# Supplementary material for: Cyclic Diaryl λ3-Chloranes: Reagents and Their C–C and C–O Couplings with Phenols via Aryne Intermediates
Source: PubMed Central journal article supplement — J Am Chem Soc. 2022 Dec 19;145(1):345–58. doi: 10.1021/jacs.2c10090 (PMC9837845; doi:10.1021/jacs.2c10090), 2022-12-19

## Supporting Information

# Cyclic Diaryl $\lambda^3$ -chloranes: reagents and their C-C and C-O couplings with phenols *via* aryne intermediates

Matteo Lanzi,<sup>a</sup> Torben Rogge,<sup>b</sup> Tan Sang Truong,<sup>a</sup> K. N. Houk,<sup>\*b</sup> and Joanna Wencel-Delord<sup>\*a</sup>

<sup>a</sup> Laboratoire d'Innovation Moléculaire et Applications (UMR CNRS 7042), Université de Strasbourg/Université de Haute Alsace, ECPM 25 rue Becquerel, 67087 Strasbourg (France)

<sup>b</sup> Department of Chemistry and Biochemistry, University of California, Los Angeles, CA 90095, USA

## Contents

|                                                                                                                             |     |
|-----------------------------------------------------------------------------------------------------------------------------|-----|
| General Remarks .....                                                                                                       | 3   |
| General procedure A: Synthesis of 2'-chloro-[1,1'-biphenyl]-2-amine <b>1a-z</b> .....                                       | 5   |
| Transition metal-free preparation of the 2'-chloro-[1,1'-biphenyl]-2-amine <b>1a</b> .....                                  | 14  |
| Optimization of the preparation of cyclic diaryl $\lambda^3$ -chloranes.....                                                | 15  |
| General procedure B: Preparation of cyclic diaryl $\lambda^3$ -chloranes <b>2a-z</b> .....                                  | 16  |
| Preparation of cyclic diaryl $\lambda^3$ -iodane <b>4a-OTf</b> .....                                                        | 26  |
| Preparation of cyclic diaryl $\lambda^3$ -bromane <b>3a-OTf</b> .....                                                       | 26  |
| Optimization of the reactions conditions:.....                                                                              | 27  |
| Control Experiments.....                                                                                                    | 27  |
| Optimization of metal-free CDC C-C bond formation with cyclic diaryl $\lambda^3$ -chloranes .....                           | 32  |
| Optimization of metal free C-O arylation of phenols with cyclic diaryl $\lambda^3$ -chloride.....                           | 34  |
| General procedure C: Metal-free CDC C-C bond formation with cyclic diaryl $\lambda^3$ -chloranes <b>5a-u</b> .....          | 35  |
| General procedure D: Metal free C-O arylation of phenols with cyclic diaryl $\lambda^3$ -chloranes <b>7a-I</b> .....        | 43  |
| General procedure E: Metal free C-O arylation of phenols with cyclic diaryl $\lambda^3$ -bromanes <b>9a-E</b> .....         | 49  |
| Unsymmetric Substrates.....                                                                                                 | 51  |
| Cycloadditions with cyclic diaryl $\lambda^3$ -chloranes .....                                                              | 58  |
| General procedure, Optimization and Set-up of metal free C-O arylation of phenols with cyclic diaryl $\lambda^3$ -chloranes | 60  |
| Preparation of deuterated substrates: .....                                                                                 | 63  |
| Mechanistic Investigations: .....                                                                                           | 65  |
| Competition experiments: Metal-free CDC C-C bond formation with cyclic diaryl $\lambda^3$ -chloranes.....                   | 65  |
| Competition experiments: Metal free C-O arylation of phenols with cyclic diaryl $\lambda^3$ -chloranes .....                | 66  |
| Deuterated solvent: Metal free C-O arylation of phenols with cyclic diaryl $\lambda^3$ -chloranes .....                     | 67  |
| Deuterated solvent: Metal-free CDC C-C bond formation with cyclic diaryl $\lambda^3$ -chloranes .....                       | 72  |
| Deuterated Substrate: .....                                                                                                 | 74  |
| Metal free C-O arylation of phenols with cyclic diaryl $\lambda^3$ -chloranes .....                                         | 74  |
| Metal-free CDC C-C bond formation with cyclic diaryl $\lambda^3$ -chloranes .....                                           | 77  |
| Kinetic Studies: .....                                                                                                      | 80  |
| Metal-free CDC C-C bond formation with cyclic diaryl $\lambda^3$ -chloranes .....                                           | 80  |
| Metal free C-O arylation of phenols with cyclic diaryl $\lambda^3$ -chloranes .....                                         | 81  |
| Computational Data.....                                                                                                     | 82  |
| Summary of Energies .....                                                                                                   | 87  |
| Cartesian Coordinates of Optimized Structures.....                                                                          | 89  |
| Post-Functionalization:.....                                                                                                | 105 |
| Crystallographic data.....                                                                                                  | 116 |
| <b>2a</b> -BF <sub>4</sub> .....                                                                                            | 117 |
| <b>2w</b> .....                                                                                                             | 124 |
| <b>19</b> .....                                                                                                             | 131 |
| <b>22</b> .....                                                                                                             | 138 |
| References .....                                                                                                            | 150 |
| Copy of NMR spectra .....                                                                                                   | 152 |

## General Remarks

All reactions were carried out under nitrogen atmosphere in flame-dried glassware. Liquids and solutions were transferred with syringes or cannula purged with nitrogen prior to use. Air- and moisture-sensitive materials were stored, protected and handled under an atmosphere of argon, with appropriate glassware. Tetrahydrofuran (THF) was freshly distilled from sodium/benzophenone prior to use. Technical grade solvents for extraction and chromatography (cyclohexane and ethyl acetate) were used without purification. All reagents, if commercially available, were purchased from standard suppliers (Sigma Aldrich, ABCR, Fluorochem, TCI, Alfa Aesar and Apollo scientific) and used without further purification unless otherwise stated. Reactions were cooled using acetone / dry ice / liquid nitrogen baths and heated using an oil bath on a magnetic stirrer.

**Chromatography:** Analytical thin-layer chromatography (TLC) was performed using aluminum plates coated with silica (0.25 mm, Merck silica-gel 60-F254). Flash column chromatography was performed on VWR silica gel (40 – 63  $\mu\text{m}$ ) using the indicated solvents. Spots were visualized by UV light irradiation and/or by staining of the TLC plate with potassium permanganate ( $\text{KMnO}_4$  (0.3 g),  $\text{K}_2\text{CO}_3$  (20 g) and  $\text{KOH}$  (0.3 g) in water (300 mL)), followed by heating with a heat gun if necessary.

**Analytical data:** NMR:  $^1\text{H}$  NMR (400 or 500 MHz),  $^{19}\text{F}$  NMR (376 or 471 MHz) and  $^{13}\text{C}$  NMR (101 or 126 MHz) spectra were recorded on Bruker Avance III HD 400 and 500 MHz instruments respectively. Chemical shifts are reported as  $\delta$ -values in parts per million (ppm) and are referred to partially deuterated chloroform, DMSO or Acetone (chloroform  $\delta[^1\text{H}] = 7.26$  ppm and  $\delta[^{13}\text{C}] = 77.0$  ppm; DMSO  $\delta[^1\text{H}] = 2.50$  ppm and  $\delta[^{13}\text{C}] = 39.52$  ppm; Acetone  $\delta[^1\text{H}] = 2.05$  ppm and  $\delta[^{13}\text{C}] = 29.84$  ppm). The spectra were processed with MestreNova (Mestrelab). Multiplicities were abbreviated as s (singlet), brs (broad signal), d (doublet), t (triplet), q (quartet), m (multiplet), dd (doublet of doublets), ddd (doublet of doublets of doublets). Coupling constants  $J$  were given in Hz. If not otherwise noted, the coupling constants given are either H-H or HF coupling constants for proton signals, and C-F and Si-F coupling constants for carbon and silicon signals. HRMS: High resolution mass spectrometry (HRMS) analysis were performed by the analytical facility at the University of Strasbourg. APCI-TOF-MS: MS experiments were performed on a Bruker Daltonics microTOF spectrometer (Bruker Daltonik GmbH, Bremen, Germany) equipped with an Agilent APCI source. Calibration was performed using APCI/APPI calibrant solution (Agilent Technologies). Sample solutions were introduced into the spectrometer source with a syringe pump (Harvard type 55 1111: Harvard Apparatus Inc., South Natick, MA, USA) with a flow rate of 4  $\mu\text{L}\cdot\text{min}^{-1}$ . ESI-TOF-MS: MS experiments were performed on a Bruker Daltonics microTOF spectrometer (Bruker Daltonik GmbH, Bremen, Germany) equipped with an orthogonal electrospray (ESI) interface. Calibration was performed using Tuning mix (Agilent Technologies). Sample solutions were introduced into the spectrometer source with a syringe pump (Harvard type 55 1111: Harvard Apparatus Inc., South Natick, MA, USA) with a flow rate of 4  $\mu\text{L}\cdot\text{min}^{-1}$ . X-Ray:

The X-ray crystallographic structure analysis was performed by the radio-crystallographic facility at the Université de Strasbourg. The crystals were placed in oil, and a single crystal was selected, mounted on a glass fibre and placed in a low-temperature N<sub>2</sub> stream. X-ray diffraction data collection was carried out on a Bruker PHOTON III DUO CPAD diffractometer equipped with an Oxford Cryosystem liquid N<sub>2</sub> device, using Mo-K $\alpha$  radiation ( $\lambda = 0.71073 \text{ \AA}$ ). The crystal-detector distance was 37mm. The cell parameters were determined (APEX3 software) <sup>1</sup> from reflections taken from 1 set of 180 frames at 1s exposure. The structure was solved using the program SHELXT-2014 <sup>2</sup>. The refinement and all further calculations were carried out using SHELXL-2014 <sup>3</sup>. The H-atoms were included in calculated positions and treated as riding atoms using SHELXL default parameters. The non-H atoms were refined anisotropically, using weighted full-matrix least-squares on F<sup>2</sup>. A semi-empirical absorption correction was applied using SADABS in APEX3 <sup>1</sup>; transmission factors: T<sub>min</sub>/T<sub>max</sub> = 0.7209/0.7458.

CCDC 2176956, 2176957, 2176958, 2176959 contain respectively the supplementary crystallographic data for compounds **2a**-BF<sub>4</sub>, **2w**, **19** and **22**.

## General procedure A: Synthesis of 2'-chloro-[1,1'-biphenyl]-2-amine 1a-z

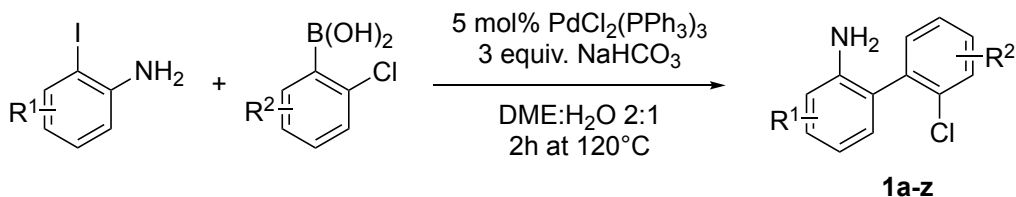

SCHEME S-1

To a flame dried Schlenk was charged 2-iodoanilines (1 equiv), 2-chlorophenylboronic acid (1.05 to 1.2 equiv), dichlorobis(triphenylphosphine)palladium (3 mol%), and NaHCO<sub>3</sub> (3 equiv). The tube was evacuated and refilled with argon three times. Then DME (0.32 M) was added. The mixture was stirred at room temperature for 5 min then H<sub>2</sub>O (2:1 DME:H<sub>2</sub>O) was added. The resulting mixture was stirred at 120 °C for 2 hours. After being cooled to room temperature, the mixture was extracted with EtOAc. The extracts were combined, dried over Na<sub>2</sub>SO<sub>4</sub>, filtered and concentrated. The resulting crude product was purified by flash chromatography (Gradient Cyclohexane:EtOAc 9:1 to 7:3) yielding the desired product as pale orange-red solid. A subsequent distillation under a high vacuum (Kugelrohr, m.p. 70-90 °C; b.p. 150 – 260°C) guarantees the isolation of **1a-z** as a metal-free white solid.

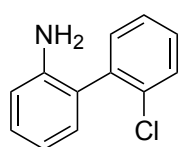

**2'-chloro-[1,1'-biphenyl]-2-amine 1a**

Following the **GP-A** using 2-iodoaniline (4 g, 18.3 mmol) and 2-chlorophenylboronic acid (3.43 g, 22 mmol) **1a** was obtained as colorless solid in 82% yield (15 mmol, 3.06 g).

**<sup>1</sup>H NMR** (400 MHz, CDCl<sub>3</sub>) δ 7.52 – 7.50 (m, 1H), 7.36 – 7.31 (m, 3H), 7.22 (ddd, *J* = 8.0, 7.3, 1.6 Hz, 1H), 7.06 (dd, *J* = 7.5, 1.6 Hz, 1H), 6.84 (td, *J* = 7.5, 1.2 Hz, 1H), 6.80 (dd, *J* = 8.1, 1.2 Hz, 1H), 3.56 (brs, 2H). The spectral data correspond to the literature.<sup>4</sup>

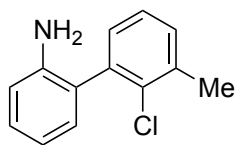

**2'-chloro-3-methyl-[1,1'-biphenyl]-2-amine 1d**

Following the **GP-A** using 2-iodoaniline (380 mg, 1.73 mmol) and (2-chloro-3-methylphenyl)boronic acid (310 mg, 1.82 mmol) **1b** was obtained in 68% yield (1.17 mmol, 255 mg) as colorless oil.

**<sup>1</sup>H NMR** (400 MHz, CDCl<sub>3</sub>) δ 7.26 – 7.16 (m, 4H), 7.05 (dd, *J* = 7.6, 1.6 Hz, 1H), 6.83 (td, *J* = 7.5, 1.2 Hz, 1H), 6.79 (dd, *J* = 7.9, 1.2 Hz, 1H), 3.25 (brs, 2H), 2.46 (s, 3H). **<sup>13</sup>C NMR** (101 MHz, CDCl<sub>3</sub>) δ 143.6, 138.1, 137.1, 134.0, 130.3, 130.3, 129.3, 128.9, 126.7, 126.1, 118.3, 115.5, 20.9. **HRMS (ESI):** *m/z* [M+H]<sup>+</sup> calcd for C<sub>13</sub>H<sub>13</sub>ClN<sup>+</sup>: 218.0731; found: 218.0718.

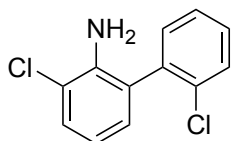

### 2',3-dichloro-[1,1'-biphenyl]-2-amine **1c**

Following the **GP-A** using 2-chloro-6-iodoaniline (486 mg, 1.9 mmol) and 2-chlorophenylboronic acid (315 mg, 2 mmol) **1c** was obtained in 89% yield (1.71 mmol, 408 mg) as colorless oil.

**<sup>1</sup>H NMR** (500 MHz, CDCl<sub>3</sub>) δ 7.53 – 7.52 (m, 1H), 7.37 – 7.30 (m, 4H), 6.97 (dd, *J* = 7.6, 1.4 Hz, 1H), 6.76 (t, *J* = 7.8 Hz, 1H), 3.96 (brs, 2H). **<sup>13</sup>C NMR** (126 MHz, CDCl<sub>3</sub>) δ 140.6, 137.1, 133.8, 131.7, 130.0, 129.4, 129.1, 128.8, 127.3, 126.1, 119.5, 118.0. **HRMS (ESI)**: *m/z* [M+H]<sup>+</sup> calcd for C<sub>12</sub>H<sub>10</sub>Cl<sub>2</sub>N<sup>+</sup>: 238.0185; found: 238.0187.

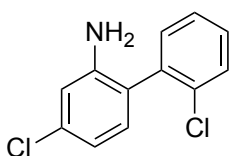

### 2',4-dichloro-[1,1'-biphenyl]-2-amine **1d**

Following the **GP-A** using 5-chloro-2-iodoaniline (486 mg, 1.92 mmol) and 2-chlorophenylboronic acid (315 mg, 2.01 mmol) **1d** was obtained in 73% yield (1.4 mmol, 333.6 mg) as colorless oil.

**<sup>1</sup>H NMR** (500 MHz, CDCl<sub>3</sub>) δ 7.52 – 7.50 (m, 1H), 7.35 – 7.30 (m, 3H), 6.97 (d, *J* = 7.9 Hz, 1H), 6.81 – 6.78 (m, 2H), 3.63 (brs, 2H). **<sup>13</sup>C NMR** (126 MHz, CDCl<sub>3</sub>) δ 145.0, 136.9, 134.6, 133.9, 131.9, 131.6, 130.1, 129.4, 127.4, 123.6, 118.3, 115.2. **HRMS (ESI)**: *m/z* [M+H]<sup>+</sup> calcd for C<sub>12</sub>H<sub>10</sub>Cl<sub>2</sub>N<sup>+</sup>: 238.0185; found: 238.0187.

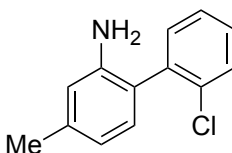

### 2'-chloro-4-methyl-[1,1'-biphenyl]-2-amine **1e**

Following the **GP-A** using 2-iodo-5-methylaniline (466 mg, 2 mmol) and 2-chlorophenylboronic acid (328 mg, 2.1 mmol) **1e** was obtained in 68% yield (1.37 mmol, 298 mg) as colorless oil.

**<sup>1</sup>H NMR** (500 MHz, CDCl<sub>3</sub>) δ 7.52 – 7.50 (m, 1H), 7.35 – 7.30 (m, 3H), 6.97 (d, *J* = 7.6 Hz, 1H), 6.69 – 6.67 (m, 1H), 6.64 – 6.63 (brs, 1H), 3.51 (brs, 2H), 2.34 (s, 3H). **<sup>13</sup>C NMR** (126 MHz, CDCl<sub>3</sub>) δ 143.5, 139.0, 137.9, 134.0, 132.0, 130.2, 129.8, 128.9, 127.1, 122.6, 119.2, 116.2, 21.3. **HRMS (ESI)**: *m/z* [M+H]<sup>+</sup> calcd for C<sub>13</sub>H<sub>13</sub>ClN<sup>+</sup>: 218.0731; found: 218.0743.

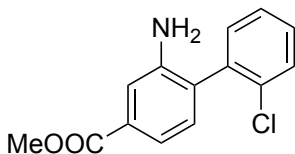

### methyl 2-amino-2'-chloro-[1,1'-biphenyl]-4-carboxylate **1f**

Following the **GP-A** using methyl 3-amino-4-iodobenzoate (531 mg, 1.92 mmol) and 2-chlorophenylboronic acid (315 mg, 2.01 mmol) **1f** was obtained in 58% yield (1.11 mmol, 289 mg) as colorless oil.

**<sup>1</sup>H NMR** (500 MHz, CDCl<sub>3</sub>) δ 7.52 – 7.47 (m, 3H), 7.36 – 7.30 (m, 3H), 7.11 (d, *J* = 7.8 Hz, 1H), 3.91 (s, 3H), 3.70 (brs, 2H). **<sup>13</sup>C NMR** (126 MHz, CDCl<sub>3</sub>) δ 167.1, 143.9, 137.0, 133.4, 131.4, 130.8, 130.5, 130.0, 129.5, 129.4, 127.3, 119.2, 116.3, 52.0. **HRMS (ESI)**: *m/z* [M+H]<sup>+</sup> calcd for C<sub>14</sub>H<sub>13</sub>ClNO<sub>2</sub><sup>+</sup>: 262.0629; found: 262.0619.

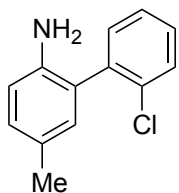

### 2'-chloro-5-methyl-[1,1'-biphenyl]-2-amine **1g**

Following the **GP-A** using 2-iodo-4-methylaniline (447 mg, 1.9 mmol) and 2-chlorophenylboronic acid (315 mg, 2.0 mmol) **1g** was obtained in 78% yield (1.49 mmol, 324 mg) as colorless oil.

**<sup>1</sup>H NMR** (500 MHz, CDCl<sub>3</sub>) δ 7.51 – 7.49 (m, 1H), 7.35 – 7.30 (m, 3H), 7.04 (ddd, *J* = 8.1, 2.3, 0.8 Hz, 1H), 6.89 (d, *J* = 2.6 Hz, 1H), 6.72 (d, *J* = 8.1 Hz, 1H), 3.45 (brs, 2H), 2.29 (s, 3H). **<sup>13</sup>C NMR** (126 MHz, CDCl<sub>3</sub>) δ 141.2, 138.1, 133.8, 131.9, 130.7, 129.8, 129.7, 128.9, 127.5, 127.1, 125.4, 115.7, 20.4. **HRMS (ESI)**: *m/z* [M+H]<sup>+</sup> calcd for C<sub>13</sub>H<sub>13</sub>ClN<sup>+</sup>: 218.0731; found: 218.0735.

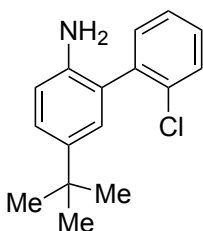

### 5-(tert-butyl)-2'-chloro-[1,1'-biphenyl]-2-amine **1h**

Following the **GP-A** using 4-tert-butyl-2-iodoaniline (455 mg, 1.65 mmol) and 2-chlorophenylboronic acid (271 mg, 1.74 mmol) **1h** was obtained in 94% yield (1.55 mmol, 402 mg) as colorless oil.

**<sup>1</sup>H NMR** (400 MHz, CDCl<sub>3</sub>) δ 7.56 – 7.53 (m, 1H), 7.42 – 7.34 (m, 3H), 7.29 – 7.26 (m, 1H), 7.12 (d, *J* = 2.4 Hz, 1H), 6.78 (d, *J* = 8.3 Hz, 1H), 3.50 (brs, 2H), 1.34 (s, 9H). **<sup>13</sup>C NMR** (101 MHz, CDCl<sub>3</sub>) δ 141.1, 141.1, 138.4, 133.9, 131.9, 129.9, 128.8, 127.4, 127.1, 125.9, 124.9, 115.3, 34.0, 31.5 (3C). **HRMS (ESI)**: *m/z* [M+H]<sup>+</sup> calcd for C<sub>16</sub>H<sub>19</sub>ClN<sup>+</sup>: 260.1201; found: 260.1205.

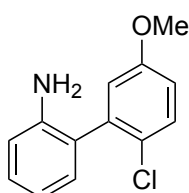

### 2'-chloro-5'-methoxy-[1,1'-biphenyl]-2-amine **1i**

Following the **GP-A** using 2-iodoaniline (392 mg, 1.79 mmol) and (2-chloro-5-methoxyphenyl)boronic acid (350 mg, 1.88 mmol) **1i** was obtained in 88% yield (1.57 mmol, 365.9 mg) as colorless oil.

**<sup>1</sup>H NMR** (500 MHz, CDCl<sub>3</sub>) δ 7.28 – 7.26 (m, 1H), 7.09 (ddd, *J* = 8.1, 7.3, 1.5 Hz, 1H), 6.94 (dd, *J* = 7.6, 1.6 Hz, 1H), 6.76 – 6.74 (m, 2H), 6.72 (td, *J* = 7.5, 1.2 Hz, 1H), 6.67 (dd, *J* = 7.9, 1.2 Hz, 1H), 3.68 (s, 3H), 3.48 (brs, 2H). **<sup>13</sup>C NMR** (126 MHz, CDCl<sub>3</sub>) δ 158.5, 143.7, 138.7, 130.5, 130.2, 129.1, 125.3, 125.0, 118.2, 116.6, 115.5, 115.1, 55.5. **HRMS (ESI)**: *m/z* [M+H]<sup>+</sup> calcd for C<sub>13</sub>H<sub>13</sub>ClNO<sup>+</sup>: 234.0680; found: 234.0684.

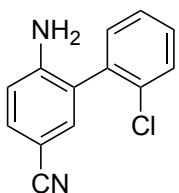

### 6-amino-2'-chloro-[1,1'-biphenyl]-3-carbonitrile **1j**

Following the **GP-A** using 4-amino-3-iodobenzonitrile (488 mg, 2.0 mmol) and 2-chlorophenylboronic acid (328 mg, 2.1 mmol) **1j** was obtained in 73% yield (1.46 mmol, 335 mg) as colorless oil.

**<sup>1</sup>H NMR** (400 MHz, CDCl<sub>3</sub>) δ 7.54 – 7.50 (m, 1H), 7.45 (dd, *J* = 8.4, 2.0 Hz, 1H), 7.39 – 7.35 (m, 2H), 7.33 (d, *J* = 2.0 Hz, 1H), 7.31 – 7.28 (m, 1H), 6.76 (d, *J* = 8.4 Hz, 1H), 4.07 (s, 2H). **<sup>13</sup>C NMR**

(101 MHz, CDCl<sub>3</sub>)  $\delta$  147.9, 135.4, 134.7, 133.8, 133.2, 131.6, 130.2, 130.0, 127.6, 124.8, 119.9, 115.0, 100.2. **HRMS (ESI):**  $m/z$  [M+H]<sup>+</sup> calcd for C<sub>13</sub>H<sub>10</sub>ClN<sub>2</sub><sup>+</sup>: 229.0527; found: 229.0531.

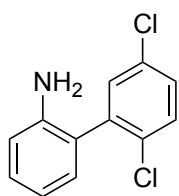

### 2',5'-dichloro-[1,1'-biphenyl]-2-amine **1k**

Following the **GP-A** using 2-iodoaniline (438 mg, 2.0 mmol) and 2,5-dichlorophenylboronic acid (401 mg, 2.1 mmol) **1k** was obtained in 64% yield (1.28 mmol, 305 mg) as colorless oil.

**<sup>1</sup>H NMR** (400 MHz, CDCl<sub>3</sub>)  $\delta$  7.44 (d,  $J$  = 8.6 Hz, 1H), 7.36 (d,  $J$  = 2.6 Hz, 1H), 7.30 (dd,  $J$  = 8.6, 2.6 Hz, 1H), 7.23 (ddd,  $J$  = 8.1, 7.3, 1.6 Hz, 1H), 7.03 (dd,  $J$  = 7.6, 1.6 Hz, 1H), 6.84 (td,  $J$  = 7.5, 1.1 Hz, 1H), 6.79 (dd,  $J$  = 8.1, 1.2 Hz, 1H), 3.57 (brs, 2H). **<sup>13</sup>C NMR** (101 MHz, CDCl<sub>3</sub>)  $\delta$  143.6, 139.5, 132.9, 132.3, 131.8, 130.9, 130.2, 129.5, 129.0, 124.0, 118.4, 115.6. **HRMS (ESI):**  $m/z$  [M+H]<sup>+</sup> calcd for C<sub>12</sub>H<sub>10</sub>Cl<sub>2</sub>N<sup>+</sup>: 238.0185; found: 238.0187.

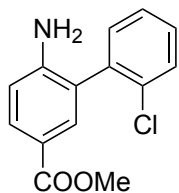

### methyl 6-amino-2'-chloro-[1,1'-biphenyl]-3-carboxylate **1l**

Following the **GP-A** using methyl 4-amino-3-iodobenzoate (531 mg, 1.9 mmol) and 2-chlorophenylboronic acid (315 mg, 2.0 mmol) **1l** was obtained in 79% yield (1.51 mmol, 395 mg) as colorless oil.

**<sup>1</sup>H NMR** (500 MHz, CDCl<sub>3</sub>)  $\delta$  7.89 (dd,  $J$  = 8.5, 2.1 Hz, 1H), 7.77 (d,  $J$  = 2.1 Hz, 1H), 7.52 – 7.50 (m, 1H), 7.37 – 7.31 (m, 3H), 6.75 (d,  $J$  = 8.5 Hz, 1H), 3.98 (brs, 2H), 3.85 (s, 3H). **<sup>13</sup>C NMR** (126 MHz, CDCl<sub>3</sub>)  $\delta$  167.0, 148.2, 136.7, 133.9, 132.5, 131.9, 131.1, 130.0, 129.5, 127.4, 124.0, 119.5, 114.3, 51.6. **HRMS (ESI):**  $m/z$  [M+H]<sup>+</sup> calcd for C<sub>14</sub>H<sub>13</sub>ClNO<sub>2</sub><sup>+</sup>: 262.0629; found: 262.0640.

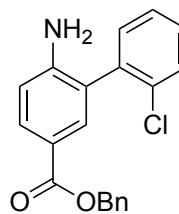

### benzyl 6-amino-2'-chloro-[1,1'-biphenyl]-3-carboxylate **1m**

Following the **GP-A** using benzyl 4-amino-3-iodobenzoate (530 mg, 1.5 mmol) and 2-chlorophenylboronic acid (246 mg, 1.58 mmol) **1m** was obtained in 63% yield (0.94 mmol, 318 mg) as colorless oil.

**<sup>1</sup>H NMR** (400 MHz, CDCl<sub>3</sub>)  $\delta$  7.95 (dd,  $J$  = 8.5, 2.0 Hz, 1H), 7.81 (d,  $J$  = 2.1 Hz, 1H), 7.53 – 7.50 (m, 1H), 7.45 – 7.43 (m, 2H), 7.40 – 7.31 (m, 6H), 6.75 (d,  $J$  = 8.4 Hz, 1H), 5.33 (s, 2H), 4.06 (brs, 2H). **<sup>13</sup>C NMR** (101 MHz, CDCl<sub>3</sub>)  $\delta$  166.4, 148.3, 136.6, 136.4, 133.9, 132.6, 131.9, 131.3, 129.9, 129.5, 128.5 (2C), 128.1 (2C), 128.0, 127.4, 124.0, 119.4, 114.3, 66.1. **HRMS (ESI):**  $m/z$  [M+H]<sup>+</sup> calcd for C<sub>20</sub>H<sub>17</sub>ClNO<sub>2</sub><sup>+</sup>: 338.0942; found: 338.0951.



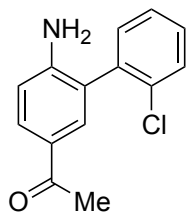

**1-(6-amino-2'-chloro-[1,1'-biphenyl]-3-yl)ethan-1-one 1n**

Following the **GP-A** using 1-(4-amino-3-iodophenyl)ethan-1-one (706 mg, 2.7 mmol) and 2-chlorophenylboronic acid (444 mg, 2.84 mmol) **1n** was obtained in 56% yield (1.52 mmol, 374 mg) as colorless oil.

**<sup>1</sup>H NMR** (400 MHz, CDCl<sub>3</sub>) δ 7.84 (dd, *J* = 8.5, 2.1 Hz, 1H), 7.70 (d, *J* = 2.2 Hz, 1H), 7.52 – 7.50 (m, 1H), 7.36 – 7.31 (m, 3H), 6.75 (d, *J* = 8.4 Hz, 1H), 4.04 (brs, 2H), 2.50 (s, 3H). **<sup>13</sup>C NMR** (101 MHz, CDCl<sub>3</sub>) δ 196.3, 148.5, 136.6, 133.8, 131.8, 131.8, 130.2, 130.0, 129.5, 127.5, 127.4, 123.8, 114.2, 26.0. **HRMS (ESI)**: *m/z* [M+Na]<sup>+</sup> calcd for C<sub>14</sub>H<sub>12</sub>ClNNaO<sup>+</sup>: 268.0500; found: 268.0501.

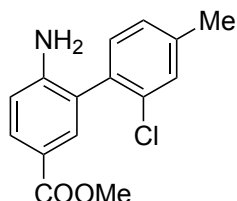

**methyl 6-amino-2'-chloro-4'-methyl-[1,1'-biphenyl]-3-carboxylate 1o**

Following the **GP-A** using methyl 4-amino-3-iodobenzoate (532 mg, 1.92 mmol) and (2-chloro-4-methylphenyl)boronic acid (343 mg, 2.04 mmol) **1o** was obtained in 47% yield (0.9 mmol, 249 mg) as colorless oil.

**<sup>1</sup>H NMR** (400 MHz, CDCl<sub>3</sub>) δ 7.88 (dd, *J* = 8.4, 2.1 Hz, 1H), 7.75 (d, *J* = 2.0 Hz, 1H), 7.33 (brs, 1H), 7.20 (d, *J* = 7.7 Hz, 1H), 7.15 (ddd, *J* = 7.7, 1.7, 0.7 Hz, 1H), 6.74 (d, *J* = 8.4 Hz, 1H), 3.90 (brs, 2H), 3.84 (s, 3H), 2.39 (s, 3H). **<sup>13</sup>C NMR** (101 MHz, CDCl<sub>3</sub>) δ 167.1, 148.4, 139.7, 133.6, 133.5, 132.7, 131.6, 131.0, 130.4, 128.2, 124.1, 119.5, 114.2, 51.6, 20.9. **HRMS (ESI)**: *m/z* [M+H]<sup>+</sup> calcd for C<sub>15</sub>H<sub>15</sub>ClNO<sub>2</sub><sup>+</sup>: 276.0786; found: 276.0791.

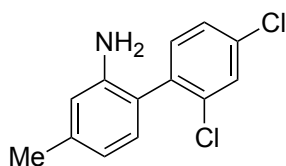

**2',4'-dichloro-4-methyl-[1,1'-biphenyl]-2-amine 1p**

Following the **GP-A** using 2-iodo-5-methylaniline (466 mg, 2 mmol) and 2,4-dichlorophenylboronic acid (457 mg, 2.4 mmol) **1p** was obtained in 65% yield (1.30 mmol, 328.5 mg) as colorless oil.

**<sup>1</sup>H NMR** (500 MHz, CDCl<sub>3</sub>) δ 7.53 (d, *J* = 2.1 Hz, 1H), 7.32 (dd, *J* = 8.2, 2.1 Hz, 1H), 7.28 (d, *J* = 8.2 Hz, 1H), 6.92 (d, *J* = 7.6 Hz, 1H), 6.68 – 6.66 (m, 1H), 6.62 (brs, 1H), 3.50 (brs, 2H), 2.33 (s, 3H). **<sup>13</sup>C NMR** (126 MHz, CDCl<sub>3</sub>) δ 143.5, 139.4, 136.5, 134.8, 134.0, 132.8, 130.2, 129.6, 127.5, 121.3, 119.3, 116.2, 21.3. **HRMS (ESI)**: *m/z* [M+H]<sup>+</sup> calcd for C<sub>13</sub>H<sub>12</sub>Cl<sub>2</sub>N<sup>+</sup>: 252.0341; found: 252.0343.

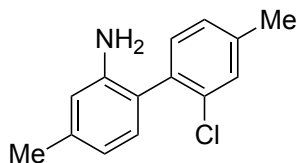

**2'-chloro-4,4'-dimethyl-[1,1'-biphenyl]-2-amine 1q**

Following the **GP-A** using 2-iodo-5-methylaniline (466 mg, 2 mmol) and (2-chloro-4-methylphenyl)boronic acid (357 mg, 2.1 mmol) **1q** was obtained in 32% yield (0.64 mmol, 148 mg) as colorless oil.

**<sup>1</sup>H NMR** (500 MHz, CDCl<sub>3</sub>) δ 7.32 (d, *J* = 0.8 Hz, 1H), 7.21 (d, *J* = 7.8 Hz, 1H), 7.13 (ddd, *J* = 7.8, 1.8, 0.8 Hz, 1H), 6.94 (d, *J* = 7.6 Hz, 1H), 6.65 (ddd, *J* = 7.8, 1.7, 0.8 Hz, 1H), 6.62 (s, 1H),

3.51 (brs, 2H), 2.38 (s, 3H), 2.32 (s, 3H).  $^{13}\text{C}$  NMR (126 MHz,  $\text{CDCl}_3$ )  $\delta$  143.7, 139.1, 138.9, 134.8, 133.6, 131.7, 130.4, 130.2, 128.0, 122.6, 119.2, 116.1, 21.3, 20.9. HRMS (ESI):  $m/z$   $[\text{M}+\text{H}]^+$  calcd for  $\text{C}_{14}\text{H}_{15}\text{ClN}^+$ : 232.0888; found: 232.0876.

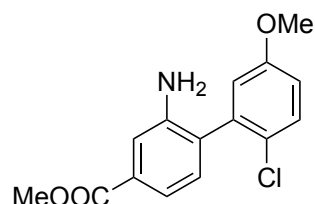

**methyl 2-amino-2'-chloro-5'-methoxy-[1,1'-biphenyl]-4-carboxylate 1r**

Following the GP-A using methyl 3-amino-4-iodobenzoate (554 mg, 2 mmol) and (2-chloro-5-methoxyphenyl)boronic acid (447 mg, 2.4 mmol) **1r** was obtained in 57% yield (1.14 mmol, 333.3 mg) as colorless oil.

$^1\text{H}$  NMR (500 MHz,  $\text{CDCl}_3$ )  $\delta$  7.48 (dd,  $J = 7.8, 1.7$  Hz, 1H), 7.46 (d,  $J = 1.5$  Hz, 1H), 7.39 (d,  $J = 8.9$  Hz, 1H), 7.11 (d,  $J = 7.8$  Hz, 1H), 6.88 (dd,  $J = 8.9, 3.1$  Hz, 1H), 6.84 (d,  $J = 3.1$  Hz, 1H), 3.90 (s, 3H), 3.80 (s, 3H), 3.76 (brs, 2H).  $^{13}\text{C}$  NMR (126 MHz,  $\text{CDCl}_3$ )  $\delta$  167.0, 158.5, 143.9, 137.7, 130.8, 130.7, 130.3, 129.4, 124.5, 119.1, 116.3, 116.2, 115.4, 55.5, 52.0. HRMS (ESI):  $m/z$   $[\text{M}+\text{H}]^+$  calcd for  $\text{C}_{15}\text{H}_{15}\text{ClNO}_3^+$ : 292.0735; found: 292.0742.

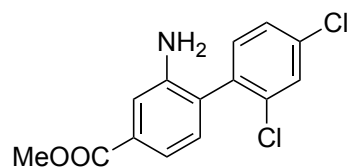

**methyl 2-amino-2',4'-dichloro-[1,1'-biphenyl]-4-carboxylate 1s**

Following the GP-A using 2methyl 3-amino-4-iodobenzoate (554 mg, 2 mmol) and 2,4-dichlorophenylboronic acid (458 mg, 2.4 mmol) **1s** was obtained in 64% yield (1.28 mmol, 380 mg) as colorless oil.

$^1\text{H}$  NMR (500 MHz,  $\text{CDCl}_3$ )  $\delta$  7.53 (d,  $J = 2.0$  Hz, 1H), 7.48 – 7.46 (m, 2H), 7.34 (dd,  $J = 8.2, 2.1$  Hz, 1H), 7.26 (d,  $J = 8.2$  Hz, 1H), 7.07 (d,  $J = 7.8$  Hz, 1H), 3.90 (s, 3H), 3.65 (brs, 2H).  $^{13}\text{C}$  NMR (126 MHz,  $\text{CDCl}_3$ )  $\delta$  166.9, 143.9, 135.5, 134.7, 134.3, 132.3, 131.1, 130.5, 129.9, 128.1, 127.7, 119.2, 116.4, 52.1. HRMS (ESI):  $m/z$   $[\text{M}+\text{H}]^+$  calcd for  $\text{C}_{14}\text{H}_{12}\text{Cl}_2\text{NO}_2^+$ : 296.0240; found: 296.0247.

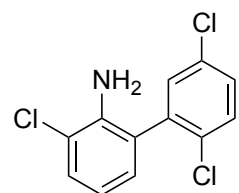

**2',3,5'-trichloro-[1,1'-biphenyl]-2-amine 1t**

Following the GP-A using 2-iodoaniline (438 mg, 2.0 mmol) and 2,5-dichlorophenylboronic acid (401 mg, 2.1 mmol) **1t** was obtained in 64% yield (1.28 mmol, 305 mg) as colorless oil.

$^1\text{H}$  NMR (400 MHz,  $\text{CDCl}_3$ )  $\delta$  7.37 (dd,  $J = 7.9, 1.0$  Hz, 1H), 7.27 – 7.23 (m, 3H), 6.86 (dd,  $J = 7.6, 1.5$  Hz, 1H), 6.68 (t,  $J = 7.8$  Hz, 1H), 3.89 (brs, 2H).  $^{13}\text{C}$  NMR (101 MHz,  $\text{CDCl}_3$ )  $\delta$  140.5, 138.7, 133.0, 132.2, 131.6, 131.1, 129.5 (2C), 128.7, 124.8, 119.6, 118.2. HRMS (ESI):  $m/z$   $[\text{M}+\text{H}]^+$  calcd for  $\text{C}_{12}\text{H}_9\text{Cl}_3\text{N}^+$ : 271.9795; found: 271.9795.

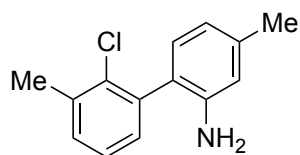

**2'-chloro-3',4-dimethyl-[1,1'-biphenyl]-2-amine **1u****

Following the **GP-A** using 2-iodo-5-methylaniline (651 mg, 2.79 mmol) and (2-chloro-3-methylphenyl)boronic acid (500 mg, 2.93 mmol) **1u** was obtained in 60% yield (1.67 mmol, 388 mg) as colorless oil.

**<sup>1</sup>H NMR** (500 MHz, CDCl<sub>3</sub>) δ 7.30 – 7.28 (m, 1H), 7.26 (t, *J* = 7.4 Hz, 1H), 7.21 – 7.19 (m, 1H), 6.98 (d, *J* = 7.6 Hz, 1H), 6.71 (ddd, *J* = 7.6, 1.7, 0.8 Hz, 1H), 6.67 (brs, 1H), 3.57 (brs, 2H), 2.50 (s, 3H), 2.37 (s, 3H). **<sup>13</sup>C NMR** (126 MHz, CDCl<sub>3</sub>) δ 143.5, 138.8, 138.1, 137.0, 134.1, 130.2, 130.1, 129.4, 126.6, 123.3, 119.2, 116.1, 21.3, 20.9. **HRMS (ESI)**: *m/z* [M+H]<sup>+</sup> calcd for C<sub>14</sub>H<sub>15</sub>ClN<sup>+</sup>: 232.0888; found: 232.0877.

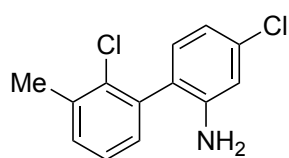

**2',4-dichloro-3'-methyl-[1,1'-biphenyl]-2-amine **1v****

Following the **GP-A** using 5-Chloro-2-iodoaniline (556 mg, 2.24 mmol) and (2-chloro-3-methylphenyl)boronic acid (420 mg, 2.46 mmol) **1v** was obtained in 47% yield (1.05 mmol, 263.7 mg) as colorless oil.

**<sup>1</sup>H NMR** (400 MHz, CDCl<sub>3</sub>) δ 7.29 – 7.26 (m, 1H), 7.23 (t, *J* = 7.5 Hz, 1H), 7.13 (ddd, *J* = 7.3, 2.0, 0.7 Hz, 1H), 6.95 (dd, *J* = 7.8, 0.6 Hz, 1H), 6.80 – 6.77 (m, 2H), 3.61 (brs, 2H), 2.45 (s, 3H). **<sup>13</sup>C NMR** (101 MHz, CDCl<sub>3</sub>) δ 144.9, 137.3, 137.0, 134.3, 134.0, 131.4, 130.6, 129.2, 126.8, 124.3, 118.2, 115.0, 20.9. **HRMS (ESI)**: *m/z* [M+H]<sup>+</sup> calcd for C<sub>13</sub>H<sub>12</sub>Cl<sub>2</sub>N<sup>+</sup>: 252.0341; found: 252.0345

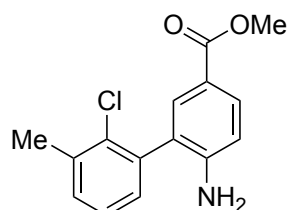

**methyl 6-amino-2'-chloro-3'-methyl-[1,1'-biphenyl]-3-carboxylate **1w****

Following the **GP-A** using methyl 4-amino-3-iodobenzoate (650 mg, 2.35 mmol) and (2-chloro-3-methylphenyl)boronic acid (420 mg, 2.46 mmol) **1w** was obtained in 74% yield (1.74 mmol, 480.1 mg) as white solid.

**<sup>1</sup>H NMR** (400 MHz, CDCl<sub>3</sub>) δ 7.89 (dd, *J* = 8.4, 2.1 Hz, 1H), 7.76 (d, *J* = 2.1 Hz, 1H), 7.29 (ddd, *J* = 7.5, 2.0, 0.6 Hz, 1H), 7.23 (d, *J* = 7.6 Hz, 1H), 7.15 (ddd, *J* = 7.3, 2.0, 0.6 Hz, 1H), 6.75 (d, *J* = 8.4 Hz, 1H), 3.95 (brs, 2H), 3.85 (s, 3H), 2.46 (s, 3H). **<sup>13</sup>C NMR** (101 MHz, CDCl<sub>3</sub>) δ 167.1, 148.2, 137.3, 137.0, 134.0, 132.4, 131.0, 130.7, 129.3, 126.8, 124.9, 119.5, 114.2, 51.6, 20.8. **HRMS (ESI)**: *m/z* [M+Na]<sup>+</sup> calcd for C<sub>15</sub>H<sub>14</sub>ClNNaO<sub>2</sub><sup>+</sup>: 298.0605; found: 298.0599.

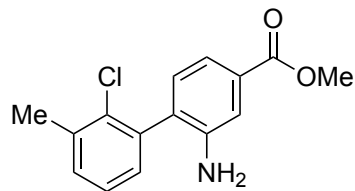

**methyl 2-amino-2'-chloro-3'-methyl-[1,1'-biphenyl]-4-carboxylate 1x**

colorless oil.

Following the **GP-A** using methyl 3-amino-4-iodobenzoate (867 mg, 3.13 mmol) and (2-chloro-3-methylphenyl)boronic acid (560 mg, 3.29 mmol) **1x** was obtained in 69% yield (2.16 mmol, 596 mg) as

**<sup>1</sup>H NMR** (500 MHz, CDCl<sub>3</sub>) δ 7.49 (dd, *J* = 7.8, 1.7 Hz, 1H), 7.47 (d, *J* = 1.4 Hz, 1H), 7.29 (ddd, *J* = 7.5, 1.9, 0.8 Hz, 1H), 7.24 (d, *J* = 7.6 Hz, 1H), 7.14 (ddd, *J* = 7.3, 1.9, 0.7 Hz, 1H), 7.11 (d, *J* = 7.8 Hz, 1H), 3.91 (s, 3H), 2.45 (s, 3H). **<sup>13</sup>C NMR** (126 MHz, CDCl<sub>3</sub>) δ 167.1, 143.7, 137.4, 137.2, 133.6, 130.8, 130.6, 130.4, 130.4, 128.8, 126.8, 119.4, 116.4, 52.1, 20.8. **HRMS (ESI):** *m/z* [M+H]<sup>+</sup> calcd for C<sub>15</sub>H<sub>15</sub>ClNO<sub>2</sub><sup>+</sup>: 276.0786; found: 276.0783.

## Synthesis of 2'-chloro-[1,1'-biphenyl]-2-amine **1b** and **1c**

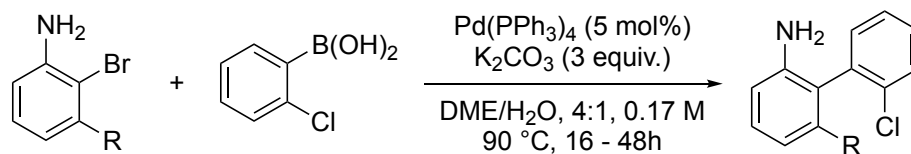

SCHEME S-2

A 25-mL round bottom flask was charged with aniline (1 equiv.), (2-chlorophenyl)boronic acid (1.2 equiv), K<sub>2</sub>CO<sub>3</sub> (3 equiv) and Pd(PPh<sub>3</sub>)<sub>4</sub> (5 mol%), and it was then evacuated and backfilled with Argon three times. After adding dioxane and H<sub>2</sub>O (5:1, 0.17 M), the resulting mixture was stirred at 90 °C for 16h (**1b**) or 48h (**1c**). After the reaction was cooled down to room temperature, H<sub>2</sub>O was added, and the resulting solution was extracted with EtOAc (3 times). The organic phase was dried over anhydrous MgSO<sub>4</sub> and concentrated under reduced pressure. The crude product was purified by flash chromatography on silica gel (cyclohexane : ethyl acetate) and further purified through distillation under a high vacuum (Kugelrohr) to afford the pure compound.

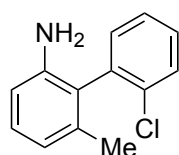

### 2'-chloro-6-methyl-[1,1'-biphenyl]-2-amine **1b**

Following the procedure reported above using 2-bromo-3-methylaniline (372 mg, 2 mmol, 1 equiv.) **1b** was obtained in 48% as a white solid (0.96 mmol, 210 mg).

**<sup>1</sup>H NMR** (400 MHz, CDCl<sub>3</sub>) δ 7.55 – 7.53 (m, 1H), 7.39 – 7.31 (m, 2H), 7.27 – 7.25 (m, 1H), 7.11 (t, J = 7.8 Hz, 1H), 6.72 (dt, J = 7.6, 0.9 Hz, 1H), 6.66 (d, J = 8.0 Hz, 1H), 1.97 (s, 3H). **<sup>13</sup>C NMR** (101 MHz, CDCl<sub>3</sub>) δ 143.7, 137.2, 136.8, 134.4, 131.7, 130.1, 129.1, 128.6, 127.6, 125.2, 120.0, 112.9, 20.1. **HRMS (ESI)**: m/z [M+H]<sup>+</sup> calcd for C<sub>13</sub>H<sub>13</sub>ClN<sup>+</sup>: 218.0731; found: 218.0739.

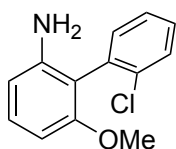

### 2'-chloro-6-methoxy-[1,1'-biphenyl]-2-amine **1c**

Following the procedure reported above using 2-bromo-3-methoxyaniline (404 mg, 2 mmol, 1 equiv.) **1c** was obtained in 51% as a white solid (1.02 mmol, 238 mg).

**<sup>1</sup>H NMR** (400 MHz, CDCl<sub>3</sub>) δ 7.55 – 7.53 (m, 1H), 7.37 – 7.30 (m, 3H), 7.18 (t, J = 8.2 Hz, 1H), 6.47 – 6.42 (m, 2H), 3.72 (s, 3H). **<sup>13</sup>C NMR** (101 MHz, CDCl<sub>3</sub>) δ 157.7, 145.0, 134.9, 134.1, 132.4, 129.8, 129.4, 128.9, 127.2, 113.9, 108.4, 101.0, 55.7. **HRMS (ESI)**: m/z [M+H]<sup>+</sup> calcd for C<sub>13</sub>H<sub>13</sub>ClNO<sup>+</sup>: 234.0680; found: 234.0664.

### Transition metal-free preparation of the 2'-chloro-[1,1'-biphenyl]-2-amine **1a**

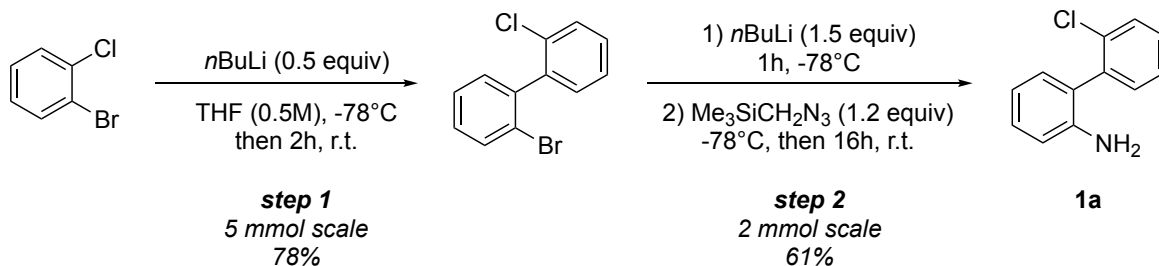

SCHEME S-3

**Step 1:** A 50-mL round-bottom flask was charged with 1-bromo-2-chlorobenzene (957 mg, 5 mmol), the reaction flask was evacuated and backfilled with Argon 3 times, followed by the addition of dried THF (10 mL). A solution of *n*-BuLi (1.6 M, 1.56 mL, 2.5 mmol, 0.5 equiv) was added dropwise at -78 °C, and the reaction mixture was stirred at rt for 2 h. The reaction was quenched with a saturated solution of NH<sub>4</sub>Cl (10 mL), extracted with EtOAc (3 x 10 mL) and washed with brine (10 mL). The organic layer was dried over MgSO<sub>4</sub> and concentrated under reduced pressure to give 2-bromo-2'-chloro-1,1'-biphenyl as pale yellow solid in 78% (522 mg, 1.95 mmol). The crude product was used for the next step without further purification.

**Step 2:** In a 25-mL round-bottom flask, the crude of 2-bromo-2'-chloro-1,1'-biphenyl (522 mg, 1.95 mmol) was redissolved in dried THF (4 mL) under Argon. A solution of *n*-BuLi (1.6 M, 1.88 mL, 3 mmol, 1.54 equiv) was added at -78 °C and the resulting mixture was stirred at -78 °C for 1 h. After adding (trimethylsilyl)methyl azide (0.45 mL, 3 mmol, 1.54 equiv) at -78 °C, the resulting mixture was stirred overnight at room temperature. The reaction was quenched with a saturated solution of NH<sub>4</sub>Cl (10 mL) and stirred for 20 min, extracted with EtOAc (3 x 20 mL) and washed with brine (10 mL). The organic layer was dried over MgSO<sub>4</sub> and concentrated under reduced pressure. Purification was performed by flash column chromatography (CyH:EtOAc 8:1) to afford **1a** as colorless oil in 61% yield (242 mg, 1.19 mmol).

## Optimization of the preparation of cyclic diaryl $\lambda^3$ -chloranes

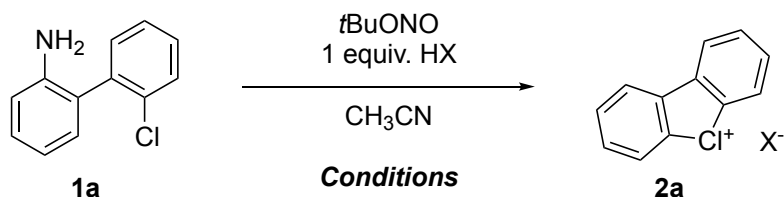

To a solution of 2'-Chloro-[1,1'-biphenyl]-2-amine **1a** (1 equiv. 0.5 mmol) in  $\text{CH}_3\text{CN}$  at  $0^\circ\text{C}$   $t\text{BuONO}$  was added followed by the protic acid (1 equiv.). The mixture was stirred at the same temperature for 1h then, following the conditions of the **Table S-1** heated at the corresponding temperature for the indicated time. The cooled reaction was purged in cold  $\text{Et}_2\text{O}$  ( $\text{Et}_2\text{O}:\text{CH}_3\text{CN}$  5:1) where a white solid precipitate. The product was collected through filtration and washed twice with  $\text{Et}_2\text{O}$  and dried under high vacuum.

**TABLE S-1**

|          | <i>HX</i>                        | <i>tBuONO equiv.</i> | <i>Solvent (M)</i>                              | <i>Conditions</i>                                                                | <i>Yields</i> |
|----------|----------------------------------|----------------------|-------------------------------------------------|----------------------------------------------------------------------------------|---------------|
| 1        | MsOH                             | 2                    | $\text{CH}_3\text{CN}$ (0.1M)                   | 1h @ $0^\circ\text{C}$ + 30min @ $65^\circ\text{C}$                              | 63%           |
| 2        | HPF <sub>6</sub>                 | 2                    | $\text{CH}_3\text{CN}$ (0.1M)                   | 1h @ $0^\circ\text{C}$ + 30min @ $65^\circ\text{C}$                              | 58%           |
| 3        | TfOH                             | 2                    | $\text{CH}_3\text{CN}$ (0.1M)                   | 1h @ $0^\circ\text{C}$ + 30min @ $65^\circ\text{C}$                              | 52%           |
| 4        | $\text{HBF}_4$                   | 2                    | $\text{CH}_3\text{CN}$ (0.1M)                   | 1h @ $0^\circ\text{C}$ + 30min @ $65^\circ\text{C}$                              | 79%           |
| 5        | $\text{HBF}_4$                   | 2                    | $\text{CH}_3\text{CN}$ (0.05M)                  | 1h @ $0^\circ\text{C}$ + 30min @ $65^\circ\text{C}$                              | 66%           |
| <b>6</b> | <b><math>\text{HBF}_4</math></b> | <b>2</b>             | <b><math>\text{CH}_3\text{CN}</math> (0.2M)</b> | <b>1h @ <math>0^\circ\text{C}</math> + 30min @ <math>65^\circ\text{C}</math></b> | <b>76%</b>    |
| 7        | $\text{HBF}_4$                   | 1.2                  | $\text{CH}_3\text{CN}$ (0.1M)                   | 1h @ $0^\circ\text{C}$ + 30min @ $65^\circ\text{C}$                              | 73%           |
| 8        | $\text{HBF}_4$                   | 2                    | $\text{CH}_3\text{CN}$ (0.1M)                   | 1h @ $0^\circ\text{C}$ + 1h @ $65^\circ\text{C}$                                 | 75%           |
| 9        | $\text{HBF}_4$                   | 2                    | $\text{CH}_3\text{CN}$ (0.1M)                   | 1h @ $0^\circ\text{C}$ + 1h @ $45^\circ\text{C}$                                 | 66%           |
| 10       | $\text{HBF}_4$                   | 2                    | $\text{CH}_3\text{CN}$ (0.1M)                   | 1h @ $0^\circ\text{C}$ + 1h @ r.t.                                               | Traces        |

## General procedure B: Preparation of cyclic diaryl $\lambda^3$ -chloranes **2a-z**

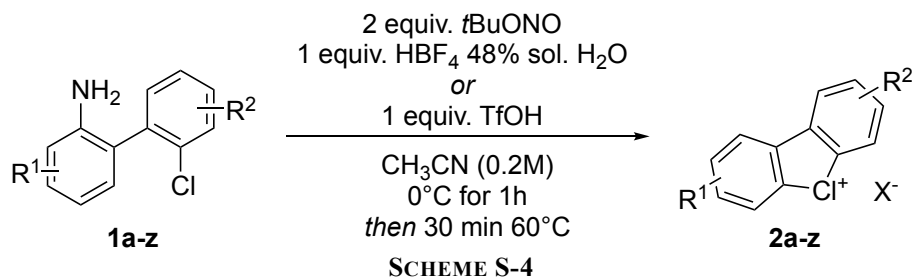

To a solution of 2'-Chloro-[1,1'-biphenyl]-2-amine **1a-z** (1 equiv. 0.5 mmol) in CH<sub>3</sub>CN (2.5 mL, 0.2 M) at 0 °C, *t*BuONO (120  $\mu$ L, 1 mmol, 2 equiv.) was added followed by the acid (*HBF*<sub>4</sub> 48% H<sub>2</sub>O sol.: 65  $\mu$ L, 0.5 mmol, 1 equiv.; *TfOH*: 45  $\mu$ L, 0.5 mmol, 1 equiv.). The mixture was stirred at the same temperature for 1h, then heated to 65 °C and stirred at the same temperature for 30 min. The cooled reaction was purged in cold Et<sub>2</sub>O (Et<sub>2</sub>O:CH<sub>3</sub>CN 5:1) where a white solid precipitate. The desired product **2a-z** was collected through filtration and washed twice with Et<sub>2</sub>O and dried under high vacuum.

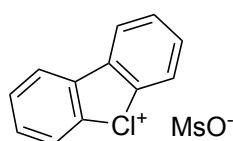

### dibenzo[b,d]chlorol-5-ium methanesulfonate **2a-OMs**

**Table S-1, Entry 1:** Following the **GP-B** using **1a** (101 mg, 0.5 mmol) **2a-OMs** was obtained as white solid in 63% yield. (88.9 mg, 0.31 mmol).

<sup>1</sup>H NMR (500 MHz, DMSO)  $\delta$  8.69 – 8.67 (m, 4H), 8.03 – 8.00 (m, 2H), 7.97 – 7.94 (m, 2H), 2.31 (s, 3H). <sup>13</sup>C NMR (126 MHz, DMSO)  $\delta$  140.0, 132.0 (2C), 131.7, 125.5, 123.0, 39.8. HRMS (ESI): *m/z* [M-MsO]<sup>+</sup> calcd for C<sub>12</sub>H<sub>8</sub>Cl<sup>+</sup>: 187.0309; found: 187.0306.

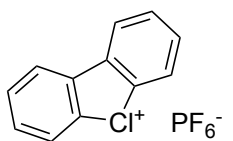

### dibenzo[b,d]chlorol-5-ium hexafluorophosphate **2a-PF<sub>6</sub>**

**Table S-1, Entry 2:** Following the **GP-B** using **1a** (101 mg, 0.5 mmol) **2a-PF<sub>6</sub>** was obtained as white solid in 58% yield. (96.3 mg, 0.29 mmol).

<sup>1</sup>H NMR (400 MHz, DMSO)  $\delta$  8.69 – 8.65 (m, 4H), 8.03 – 7.99 (m, 2H), 7.98 – 7.93 (m, 2H). <sup>13</sup>C NMR (126 MHz, DMSO)  $\delta$  140.5, 132.5 (2C), 132.2, 126.0, 123.4. <sup>19</sup>F NMR (377 MHz, DMSO)  $\delta$  -70.2 (d, *J* = 711.2 Hz). HRMS (ESI): *m/z* [M-PF<sub>6</sub>]<sup>+</sup> calcd for C<sub>12</sub>H<sub>8</sub>Cl<sup>+</sup>: 187.0309; found: 187.0304.



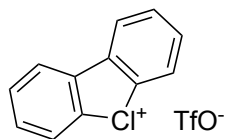

**dibenzo[b,d]chlorol-5-ium trifluoromethanesulfonate 2a-OTf**

**Table 1, Entry 3:** Following the **GP-B** using **1a** (101 mg, 0.5 mmol) **2a-OTf** was obtained as white solid in 52% yield. (87.5 mg, 0.26 mmol). (15 mmol scale: 60%, 3.05 g).

**<sup>1</sup>H NMR** (500 MHz, DMSO)  $\delta$  8.68 – 8.65 (m, 4H), 8.02 – 7.99 (m, 2H), 7.95 (ddd,  $J = 9.0, 7.2, 1.8$  Hz, 2H). **<sup>13</sup>C NMR** (126 MHz, DMSO)  $\delta$  140.0, 132.0 (2C), 131.7, 125.5, 122.9. **<sup>19</sup>F NMR** (377 MHz, DMSO)  $\delta$  -77.7. **HRMS (ESI):**  $m/z$  [M-TfO]<sup>+</sup> calcd for C<sub>12</sub>H<sub>8</sub>Cl<sup>+</sup>: 187.0309; found: 187.0309.

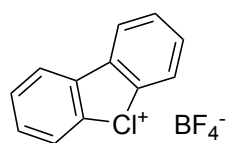

**dibenzo[b,d]chlorol-5-ium tetrafluoroborate 2a-BF<sub>4</sub>**

**Table S-1, Entry 4:** Following the **GP-B** using **1a** (101 mg, 0.5 mmol) **2a-BF<sub>4</sub>** was obtained as white solid in 79% yield. (107 mg, 0.39 mmol).

**<sup>1</sup>H NMR** (500 MHz, DMSO)  $\delta$  8.67 – 8.65 (m, 4H), 8.02 – 7.99 (m, 2H), 7.97 – 7.93 (m, 2H). **<sup>13</sup>C NMR** (126 MHz, DMSO)  $\delta$  140.0, 132.0 (2C), 131.7, 125.5, 122.9. **<sup>19</sup>F NMR** (377 MHz, DMSO)  $\delta$  -148.3. **HRMS (ESI):**  $m/z$  [M-BF<sub>4</sub>]<sup>+</sup> calcd for C<sub>12</sub>H<sub>8</sub>Cl<sup>+</sup>: 187.0309; found: 187.0303.

X-ray suitable crystals of **2a-BF<sub>4</sub>** were obtained through vapor diffusion from DCM/Hexane (Ellipsoid probability at 50%) CCDC 2176956

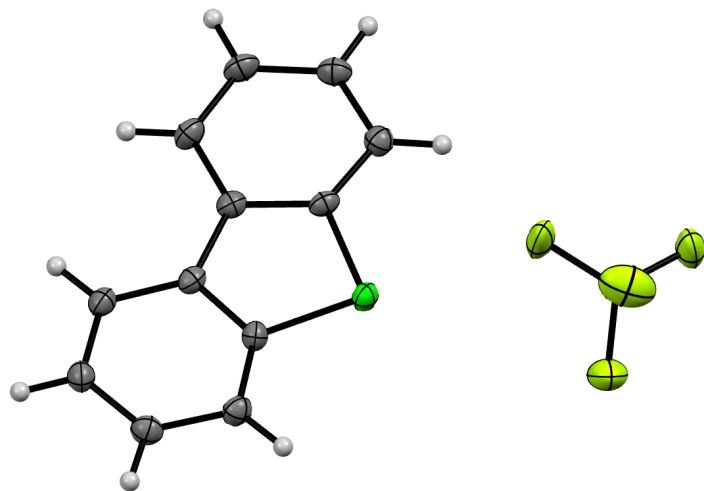

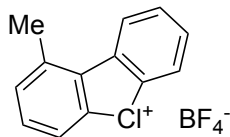

### 1-methyldibenzo[*b,d*]chlorol-5-ium tetrafluoroborate **2b**

Following the **GP-B** using **1b** (109 mg, 0.5 mmol) **2b** was obtained as white solid in 49% yield. (71 mg, 0.25 mmol).

**<sup>1</sup>H NMR** (400 MHz, DMSO)  $\delta$  8.71 (dd,  $J = 8.4, 1.3$  Hz, 1H), 8.58 – 8.53 (m, 2H), 8.03 – 7.94 (m, 2H), 7.86 – 7.81 (m, 2H), 2.91 (s, 3H). **<sup>13</sup>C NMR** (101 MHz, DMSO)  $\delta$  139.5, 138.8, 138.6, 133.9, 132.5, 131.8, 131.2, 131.1, 129.7, 127.9, 123.0, 120.4, 21.1. **<sup>19</sup>F NMR** (377 MHz, DMSO)  $\delta$  -148.2. **HRMS (ESI)**:  $m/z$  [M-BF<sub>4</sub>]<sup>+</sup> calcd for C<sub>10</sub>H<sub>10</sub>Cl<sup>+</sup>: 201.0466; found: 201.0473.

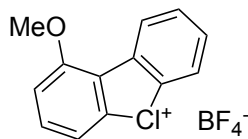

### 1-methoxydibenzo[*b,d*]chlorol-5-ium tetrafluoroborate **2c**

Following the **GP-B** using **1c** (109 mg, 0.5 mmol) **2c** was obtained as white solid in 49% yield. (71 mg, 0.25 mmol).

**<sup>1</sup>H NMR** (400 MHz, DMSO)  $\delta$  8.65 (dd,  $J = 8.5, 1.2$  Hz, 1H), 8.61 (dd,  $J = 7.7, 1.7$  Hz, 1H), 8.24 (d,  $J = 8.7$  Hz, 1H), 7.99 – 7.89 (m, 3H), 7.64 (d,  $J = 8.4$  Hz, 1H), 4.17 (s, 3H). **<sup>13</sup>C NMR** (101 MHz, DMSO)  $\delta$  158.2, 140.0, 139.0, 132.9, 132.2, 131.8, 131.3, 128.1, 123.1, 120.4, 114.7, 114.6, 57.7. **<sup>19</sup>F NMR** (377 MHz, DMSO)  $\delta$  -148.2. **HRMS (ESI)**:  $m/z$  [M-BF<sub>4</sub>]<sup>+</sup> calcd for C<sub>13</sub>H<sub>10</sub>ClO<sup>+</sup>: 217.0415; found: 217.0418.

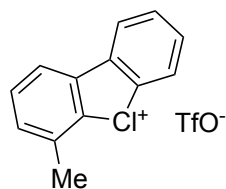

### 4-methyldibenzo[*b,d*]chlorol-5-ium trifluoromethanesulfonate **2d**

Following the **GP-B** using **1d** (255 mg, 1.17 mmol) **2d** was obtained as white solid in 58% yield. (237.7 mg, 0.68 mmol).

**<sup>1</sup>H NMR** (400 MHz, DMSO)  $\delta$  8.71 – 8.66 (m, 2H), 8.54 – 8.51 (m, 1H), 8.04 (td,  $J = 7.5, 1.2$  Hz, 1H), 8.00 – 7.92 (m, 2H), 7.85 – 7.82 (m, 1H), 2.75 (s, 3H). **<sup>13</sup>C NMR** (101 MHz, DMSO)  $\delta$  140.4, 140.1, 132.9, 132.5, 132.3, 132.1, 132.0, 131.7, 131.6, 126.2, 123.3, 122.8, 19.0. **<sup>19</sup>F NMR** (377 MHz, DMSO)  $\delta$  -77.7. **HRMS (ESI)**:  $m/z$  [M-OTf]<sup>+</sup> calcd for C<sub>13</sub>H<sub>10</sub>Cl<sup>+</sup>: 201.0466; found: 201.0462.

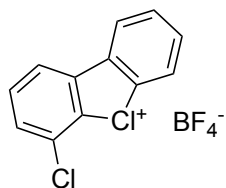

### 4-chlorodibenzo[*b,d*]chlorol-5-ium tetrafluoroborate **2e**

Following the **GP-B** using **1e** (119 mg, 0.5 mmol) **2e** was obtained as white solid in 91% yield. (140 mg, 0.45 mmol).

**<sup>1</sup>H NMR** (500 MHz, DMSO)  $\delta$  8.40 (t,  $J = 8.2$  Hz, 1H), 8.33 (dd,  $J = 8.3, 1.1$  Hz, 1H), 8.11 (dd,  $J = 7.9, 1.1$  Hz, 1H), 7.87 (dd,  $J = 7.5, 1.8$  Hz, 1H), 7.84 (dd,  $J = 8.1, 1.4$  Hz, 1H), 7.73 (td,  $J = 7.9, 1.8$  Hz, 1H), 7.68 (td,  $J = 7.5, 1.3$  Hz, 1H). **<sup>13</sup>C NMR** (126 MHz, DMSO)  $\delta$  143.1, 141.6, 136.5, 133.2, 132.6, 132.0, 131.9, 131.0, 131.0, 130.4, 128.5, 116.4. **<sup>19</sup>F NMR** (377 MHz, DMSO)  $\delta$  -148.3. **HRMS (ESI)**:  $m/z$  [M-BF<sub>4</sub>]<sup>+</sup> calcd for C<sub>12</sub>H<sub>7</sub>Cl<sub>2</sub><sup>+</sup>: 220.9919; found: 220.9914.

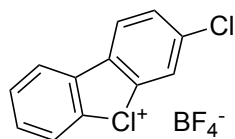

### 3-chlorodibenzo[b,d]chlorol-5-ium tetrafluoroborate **2f**

Following the **GP-B** using **1f** (119 mg, 0.5 mmol) **2f** was obtained as white solid in 66% yield. (101 mg, 0.33 mmol).

**<sup>1</sup>H NMR** (500 MHz, DMSO)  $\delta$  8.80 (d,  $J = 2.0$  Hz, 1H), 8.68 – 8.65 (m, 3H), 8.12 (dd,  $J = 8.5, 1.9$  Hz, 1H), 8.01 (td,  $J = 7.5, 1.2$  Hz, 1H), 7.97 (ddd,  $J = 9.0, 7.3, 1.8$  Hz, 1H). **<sup>13</sup>C NMR** (126 MHz, DMSO)  $\delta$  140.9, 139.4, 135.1, 132.3, 132.2, 131.9, 131.3, 131.2, 126.2, 125.7, 122.9, 122.8. **<sup>19</sup>F NMR** (377 MHz, DMSO)  $\delta$  -148.2. **HRMS (ESI)**:  $m/z$   $[M-BF_4]^+$  calcd for  $C_{12}H_7Cl_2^+$ : 220.9919; found: 220.9918.

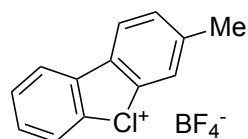

### 3-methyldibenzo[b,d]chlorol-5-ium tetrafluoroborate **2g**

Following the **GP-B** using **1g** (109 mg, 0.5 mmol) **2g** was obtained as white solid in 73% yield. (106 mg, 0.37 mmol).

**<sup>1</sup>H NMR** (500 MHz, DMSO)  $\delta$  8.61 (dd,  $J = 8.7, 1.1$  Hz, 1H), 8.56 (dd,  $J = 7.8, 1.7$  Hz, 1H), 8.49 (d,  $J = 7.9$  Hz, 1H), 8.43 (s, 1H), 7.96 (td,  $J = 7.6, 1.2$  Hz, 1H), 7.90 (ddd,  $J = 9.0, 7.3, 1.7$  Hz, 1H), 7.79 (d,  $J = 7.5$  Hz, 1H), 2.56 (s, 3H). **<sup>13</sup>C NMR** (126 MHz, DMSO)  $\delta$  143.0, 140.0, 139.9, 132.6, 131.9, 131.7, 131.5, 129.3, 125.1, 124.9, 122.9, 122.4, 21.5. **<sup>19</sup>F NMR** (377 MHz, DMSO)  $\delta$  -148.3. **HRMS (ESI)**:  $m/z$   $[M-BF_4]^+$  calcd for  $C_{13}H_{10}Cl^+$ : 201.0466; found: 201.0457.

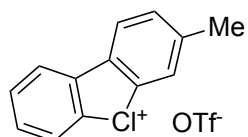

### 3-methyldibenzo[b,d]chlorol-5-ium trifluoromethanesulfonate **2g-OTf**

Following the **GP-B** using **1g** (43.5 mg, 0.2 mmol), *t*BuONO (48  $\mu$ L, 0.4 mmol, 2 equiv.) and trifluoromethanesulfonic acid (18  $\mu$ L, 0.2 mmol, 1 equiv.) **2g-OTf** was obtained as white solid in 62% yield. (43.4 mg, 0.12 mmol).

**<sup>1</sup>H NMR** (500 MHz, DMSO)  $\delta$  8.63 (dd,  $J = 8.7, 1.1$  Hz, 1H), 8.61 (dd,  $J = 7.8, 1.7$  Hz, 1H), 8.55 (d,  $J = 8.1$  Hz, 1H), 8.46 (brs, 1H), 7.98 (td,  $J = 7.5, 1.1$  Hz, 1H), 7.91 (ddd,  $J = 8.9, 7.3, 1.7$  Hz, 1H), 7.84 (dt,  $J = 7.9, 1.1$  Hz, 1H), 2.59 (s, 3H). **<sup>13</sup>C NMR** (126 MHz, DMSO)  $\delta$  142.9, 140.1, 140.0, 132.6, 132.0, 131.7, 131.5, 129.3, 125.2, 125.0, 122.9, 122.5, 21.5. **<sup>19</sup>F NMR** (377 MHz, DMSO)  $\delta$  -77.74. **HRMS (ESI)**:  $m/z$   $[M-OTf]^+$  calcd for  $C_{13}H_{10}Cl^+$ : 201.0466; found: 201.0465.

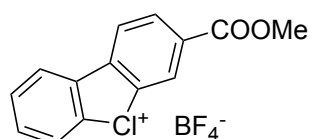

### 3-(methoxycarbonyl)dibenzo[b,d]chlorol-5-ium tetrafluoroborate **2h**

Following the **GP-B** using **1h** (131 mg, 0.5 mmol) **2h** was obtained as white solid in 85% yield. (141 mg, 0.42 mmol).

**<sup>1</sup>H NMR** (500 MHz, DMSO)  $\delta$  9.30 (d,  $J = 1.4$  Hz, 1H), 8.79 (d,  $J = 8.2$  Hz, 1H), 8.76 – 8.74 (m, 1H), 8.72 – 8.70 (m, 1H), 8.50 (dd,  $J = 8.2, 1.4$  Hz, 1H), 8.07 – 8.00 (m, 2H), 3.98 (s, 3H). **<sup>13</sup>C NMR** (126 MHz, DMSO)  $\delta$  164.1, 141.4, 139.9, 136.2, 133.1, 132.1, 132.1, 131.9, 131.1, 126.3,

125.5, 124.0, 123.1, 53.2.  $^{19}\text{F}$  NMR (377 MHz, DMSO)  $\delta$  -148.3. HRMS (ESI):  $m/z$   $[\text{M-BF}_4]^+$  calcd for  $\text{C}_{14}\text{H}_{10}\text{ClO}_2^+$ : 245.0364; found: 245.0356.

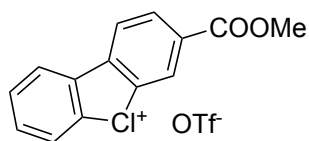

**3-(methoxycarbonyl)dibenzo[b,d]chlorol-5-ium trifluoromethanesulfonate 2h-OTf**

Following the GP-B using **2h** (52.3 mg, 0.2 mmol), *t*BuONO (48  $\mu\text{L}$ , 0.4 mmol, 2 equiv) and trifluoromethanesulfonic acid (18  $\mu\text{L}$ , 0.2 mmol, 1 equiv.) **2h-OTf** was obtained as white solid in 62% yield. (43.4 mg, 0.12 mmol).

$^1\text{H}$  NMR (400 MHz, DMSO)  $\delta$  9.30 (d,  $J$  = 1.5 Hz, 1H), 8.80 (d,  $J$  = 8.2 Hz, 1H), 8.76 (dd,  $J$  = 7.5, 2.1 Hz, 1H), 8.72 – 8.70 (m, 1H), 8.51 (dd,  $J$  = 8.1, 1.5 Hz, 1H), 8.07 – 8.00 (m, 2H), 3.98 (s, 3H).  $^{13}\text{C}$  NMR (101 MHz, DMSO)  $\delta$  164.6, 141.9, 140.4, 136.6, 133.5, 132.6, 132.6, 132.4, 131.6, 126.8, 126.0, 124.5, 123.6, 53.6.  $^{19}\text{F}$  NMR (377 MHz, DMSO)  $\delta$  -77.8. HRMS (ESI):  $m/z$   $[\text{M-BF}_4]^+$  calcd for  $\text{C}_{14}\text{H}_{10}\text{ClO}_2^+$ : 245.0364; found: 245.0363.

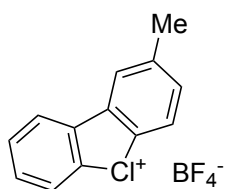

**2-methyldibenzo[b,d]chlorol-5-ium tetrafluoroborate 2i**

Following the GP-B using **1i** (109 mg, 0.5 mmol) **2i** was obtained as white solid in 72% yield. (104 mg, 0.36 mmol).

$^1\text{H}$  NMR (500 MHz, DMSO)  $\delta$  8.64 – 8.62 (m, 1H), 8.58 (dd,  $J$  = 7.6, 1.7 Hz, 1H), 8.50 – 8.48 (m, 2H), 7.99 (td,  $J$  = 7.6, 1.2 Hz, 1H), 7.93 (ddd,  $J$  = 9.0, 7.3, 1.7 Hz, 1H), 7.75 (dd,  $J$  = 9.0, 2.3 Hz, 1H), 2.56 (s, 3H).  $^{13}\text{C}$  NMR (126 MHz, DMSO)  $\delta$  142.3, 140.2, 137.3, 132.7, 131.9 (2C), 131.7 (2C), 125.5, 125.3, 123.0, 122.4, 20.8.  $^{19}\text{F}$  NMR (377 MHz, DMSO)  $\delta$  -148.3. HRMS (ESI):  $m/z$   $[\text{M-BF}_4]^+$  calcd for  $\text{C}_{13}\text{H}_{10}\text{Cl}^+$ : 201.0466; found: 201.0466.

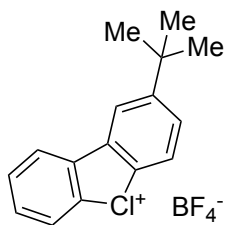

**2-(tert-butyl)dibenzo[b,d]chlorol-5-ium 2j**

Following the GP-B using **1j** (186 mg, 0.5 mmol) **2j** was obtained as white solid in 76% yield. (126 mg, 0.38 mmol).

$^1\text{H}$  NMR (400 MHz, DMSO)  $\delta$  8.80 (d,  $J$  = 7.8 Hz, 1H), 8.68 (brs, 1H), 8.64 (d,  $J$  = 8.6 Hz, 1H), 8.55 (d,  $J$  = 9.2 Hz, 1H), 8.02 – 7.98 (m, 2H), 7.93 (ddd,  $J$  = 8.8, 7.3, 1.8 Hz, 1H), 1.43 (s, 9H).  $^{13}\text{C}$  NMR (101 MHz, DMSO)  $\delta$  155.3, 140.3, 137.3, 132.2, 131.8 (2C), 131.6, 129.5, 125.7, 122.9, 122.5, 122.3, 35.4, 31.0 (3C).  $^{19}\text{F}$  NMR (377 MHz, DMSO)  $\delta$  -148.3. HRMS (ESI):  $m/z$   $[\text{M-BF}_4]^+$  calcd for  $\text{C}_{16}\text{H}_{16}\text{Cl}^+$ : 243.0935; found: 243.0949.

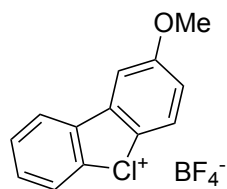

### 2-methoxydibenzo[b,d]chlorol-5-ium tetrafluoroborate **2k**

Following the **GP-B** using **1k** (117 mg, 0.5 mmol) **2k** was obtained as white solid in 81% yield. (124 mg, 0.41 mmol).

**<sup>1</sup>H NMR** (500 MHz, DMSO)  $\delta$  8.68 (d,  $J$  = 7.8 Hz, 1H), 8.63 (d,  $J$  = 8.5 Hz, 1H), 8.50 (d,  $J$  = 9.6 Hz, 1H), 8.22 (d,  $J$  = 2.9 Hz, 1H), 8.00 (t,  $J$  = 7.5 Hz, 1H), 7.94 (ddd,  $J$  = 8.9, 7.3, 1.7 Hz, 1H), 7.49 (dd,  $J$  = 9.6, 3.1 Hz, 1H), 3.97 (s, 3H). **<sup>13</sup>C NMR** (126 MHz, DMSO)  $\delta$  161.8, 140.6, 133.6, 132.0, 132.0, 131.6, 130.8, 125.7, 123.7, 123.0, 118.9, 109.3, 56.6. **<sup>19</sup>F NMR** (377 MHz, DMSO)  $\delta$  -148.3. **HRMS (ESI)**:  $m/z$  [M-BF<sub>4</sub>]<sup>+</sup> calcd for C<sub>13</sub>H<sub>10</sub>ClO<sup>+</sup>: 217.0415; found: 217.0412.

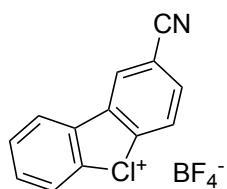

### 2-cyanodibenzo[b,d]chlorol-5-ium tetrafluoroborate **2l**

Following the **GP-B** using **1l** (114 mg, 0.5 mmol) **2l** was obtained as white solid in 47% yield. (70 mg, 0.23 mmol).

**<sup>1</sup>H NMR** (500 MHz, DMSO)  $\delta$  9.30 (d,  $J$  = 2.0 Hz, 1H), 8.86 (d,  $J$  = 9.0 Hz, 1H), 8.71 – 8.69 (m, 2H), 8.40 (dd,  $J$  = 9.0, 2.0 Hz, 1H), 8.06 (td,  $J$  = 7.4, 1.3 Hz, 1H), 8.02 (td,  $J$  = 7.9, 1.9 Hz, 1H). **<sup>13</sup>C NMR** (126 MHz, DMSO)  $\delta$  142.8, 141.2, 134.8, 133.5, 133.0, 132.0, 130.9, 129.5, 126.0, 124.3, 123.0, 117.1, 114.7. **<sup>19</sup>F NMR** (377 MHz, DMSO)  $\delta$  -148.2. **HRMS (ESI)**:  $m/z$  [M-BF<sub>4</sub>]<sup>+</sup> calcd for C<sub>13</sub>H<sub>7</sub>ClN<sup>+</sup>: 212.0262; found: 212.0264.

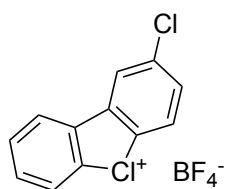

### 2-chlorodibenzo[b,d]chlorol-5-ium tetrafluoroborate **2m**

Following the **GP-B** using **1m** (119 mg, 0.5 mmol) **2m** was obtained as white solid in 82% yield. (127 mg, 0.41 mmol).

**<sup>1</sup>H NMR** (400 MHz, DMSO)  $\delta$  8.90 (d,  $J$  = 2.4 Hz, 1H), 8.71 (dd,  $J$  = 7.6, 1.8 Hz, 1H), 8.68 – 8.65 (m, 2H), 8.05 - 7.96 (m, 3H). **<sup>13</sup>C NMR** (101 MHz, DMSO)  $\delta$  141.0, 137.9, 136.8, 134.1, 132.6, 131.8, 131.5, 131.2, 125.9, 125.2, 124.4, 123.0. **<sup>19</sup>F NMR** (377 MHz, DMSO)  $\delta$  -148.3. **HRMS (ESI)**:  $m/z$  [M-BF<sub>4</sub>]<sup>+</sup> calcd for C<sub>12</sub>H<sub>7</sub>Cl<sub>2</sub><sup>+</sup>: 220.9919; found: 220.9925.

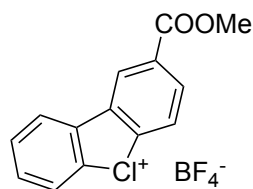

### 2-(methoxycarbonyl)dibenzo[b,d]chlorol-5-ium tetrafluoroborate **2n**

Following the **GP-B** using **1n** (131 mg, 0.5 mmol) **2n** was obtained as white solid in 79% yield. (131 mg, 0.39 mmol).

**<sup>1</sup>H NMR** (500 MHz, DMSO)  $\delta$  9.15 (d,  $J$  = 2.0 Hz, 1H), 8.87 – 8.85 (m, 1H), 8.79 (d,  $J$  = 9.2 Hz, 1H), 8.69 – 8.67 (m, 1H), 8.44 (dd,  $J$  = 9.1, 2.1 Hz, 1H), 8.02 – 7.96 (m, 2H), 3.98 (s, 3H). **<sup>13</sup>C NMR** (126 MHz, DMSO)  $\delta$  164.7, 142.9, 140.9, 132.9, 132.9, 132.5, 132.1, 131.8, 131.4, 126.2, 126.0, 123.6, 122.9, 53.1. **<sup>19</sup>F NMR** (377 MHz, DMSO)  $\delta$  -148.3. **HRMS (ESI)**:  $m/z$  [M-BF<sub>4</sub>]<sup>+</sup> calcd for C<sub>14</sub>H<sub>10</sub>ClO<sub>2</sub><sup>+</sup>: 245.0364; found: 245.0360.

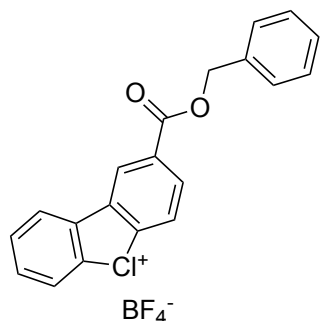

### 2-((benzyloxy)carbonyl)dibenzo[b,d]chlorol-5-ium 2o

Following the **GP-B** using **1o** (169 mg, 0.5 mmol) **2o** was obtained as white solid in 72% yield. (147 mg, 0.36 mmol).

**<sup>1</sup>H NMR** (400 MHz, DMSO)  $\delta$  9.19 (s, 1H), 8.89 (d,  $J = 6.8$  Hz, 1H), 8.81 (d,  $J = 9.2$  Hz, 1H), 8.69 (dd,  $J = 8.3, 1.5$  Hz, 1H), 8.49 (dd,  $J = 9.2, 1.7$  Hz, 1H), 8.03 – 7.96 (m, 2H), 7.55 (d,  $J = 7.8$  Hz, 2H), 7.46 – 7.37 (m, 3H), 5.49 (s, 2H). **<sup>13</sup>C NMR** (101 MHz, DMSO)  $\delta$  164.1, 143.1, 140.9, 135.6, 132.9, 132.5, 132.2, 131.8, 131.4, 128.6 (2C), 128.4, 128.2 (2C), 126.3, 126.0, 123.7, 122.9, 67.3. **<sup>19</sup>F NMR** (377 MHz, DMSO)  $\delta$  -148.3. **HRMS (ESI)**:  $m/z$   $[M-BF_4]^+$  calcd for  $C_{20}H_{14}ClO_2^+$ : 321.0677; found: 321.0695.

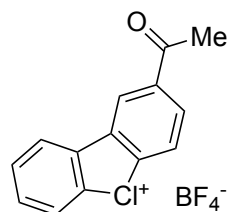

### 2-acetyldibenzo[b,d]chlorol-5-ium tetrafluoroborate 2p

Following the **GP-B** using **1p** (123 mg, 0.5 mmol) **2p** was obtained as white solid in 82% yield. (129 mg, 0.41 mmol).

**<sup>1</sup>H NMR** (500 MHz, DMSO)  $\delta$  9.18 (d,  $J = 2.0$  Hz, 1H), 8.85 (dd,  $J = 7.8, 1.7$  Hz, 1H), 8.78 (d,  $J = 9.0$  Hz, 1H), 8.69 (dd,  $J = 8.6, 1.1$  Hz, 1H), 8.44 (dd,  $J = 9.1, 2.1$  Hz, 1H), 8.04 (td,  $J = 7.6, 1.2$  Hz, 1H), 7.99 (ddd,  $J = 8.9, 7.3, 1.7$  Hz, 1H), 2.78 (s, 3H). **<sup>13</sup>C NMR** (126 MHz, DMSO)  $\delta$  196.9, 142.7, 140.9, 139.3, 132.8, 132.5, 131.8, 131.6, 131.1, 126.0, 125.1, 123.4, 123.0, 27.3. **<sup>19</sup>F NMR** (377 MHz, DMSO)  $\delta$  -148.2. **HRMS (ESI)**:  $m/z$   $[M-BF_4]^+$  calcd for  $C_{14}H_{10}ClO^+$ : 229.0415; found: 229.0418.

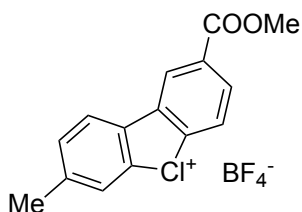

### 2-(methoxycarbonyl)-7-methyldibenzo[b,d]chlorol-5-ium tetrafluoroborate 2q

Following the **GP-B** using **1q** (138 mg, 0.5 mmol) **2q** was obtained as white solid in 92% yield. (159.5 mg, 0.46 mmol).

**<sup>1</sup>H NMR** (500 MHz, DMSO)  $\delta$  9.10 (d,  $J = 2.0$  Hz, 1H), 8.77 – 8.73 (m, 2H), 8.47 (brs, 1H), 8.41 (dd,  $J = 9.0, 2.0$  Hz, 1H), 7.83 (d,  $J = 7.9$  Hz, 1H), 3.98 (s, 3H), 2.59 (s, 3H). **<sup>13</sup>C NMR** (126 MHz, DMSO)  $\delta$  164.7, 143.6, 142.8, 141.0, 132.9, 132.8, 132.7, 131.6, 128.7, 125.7, 125.6, 123.5, 122.4, 53.1, 21.6. **<sup>19</sup>F NMR** (377 MHz, DMSO)  $\delta$  -148.26. **HRMS (ESI)**:  $m/z$   $[M-BF_4]^+$  calcd for  $C_{15}H_{12}ClO_2^+$ : 259.0520; found: 259.0524.

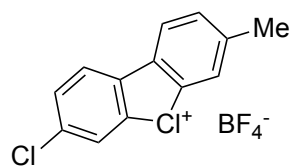

### 3-chloro-7-methyldibenzo[b,d]chlorol-5-ium tetrafluoroborate **2r**

Following the **GP-B** using **1r** (126 mg, 0.5 mmol) **2r** was obtained as white solid in 73% yield. (118 mg, 0.37 mmol).

**<sup>1</sup>H NMR** (500 MHz, DMSO)  $\delta$  8.77 (s, 1H), 8.61 (d,  $J$  = 8.4 Hz, 1H), 8.54 (d,  $J$  = 7.9 Hz, 1H), 8.45 (s, 1H), 8.10 (d,  $J$  = 8.4 Hz, 1H), 7.84 (d,  $J$  = 8.2 Hz, 1H), 2.58 (s, 3H). **<sup>13</sup>C NMR** (126 MHz, DMSO)  $\delta$  143.3, 141.0, 139.2, 134.5, 132.7, 132.2, 131.3, 128.5, 125.9, 125.2, 122.8, 122.4, 21.6. **<sup>19</sup>F NMR** (377 MHz, DMSO)  $\delta$  -148.3. **HRMS (ESI)**:  $m/z$  [M-BF<sub>4</sub>]<sup>+</sup> calcd for C<sub>13</sub>H<sub>9</sub>Cl<sub>2</sub><sup>+</sup>: 235.0076; found: 235.0070.

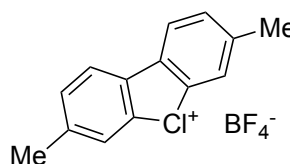

### 3,7-dimethyldibenzo[b,d]chlorol-5-ium tetrafluoroborate **2s**

Following the **GP-B** using **1s** (116 mg, 0.5 mmol) **2s** was obtained as white solid in 62% yield. (92.5 mg, 0.31 mmol).

**<sup>1</sup>H NMR** (500 MHz, DMSO)  $\delta$  8.46 (dd,  $J$  = 8.0, 1.3 Hz, 2H), 8.42 (s, 2H), 7.79 (dd,  $J$  = 8.0, 1.1 Hz, 2H), 2.56 (s, 6H). **<sup>13</sup>C NMR** (126 MHz, DMSO)  $\delta$  142.4, 139.9, 132.6, 129.3, 124.6, 122.4, 21.5. **<sup>19</sup>F NMR** (377 MHz, DMSO)  $\delta$  -148.2. **HRMS (ESI)**:  $m/z$  [M-BF<sub>4</sub>]<sup>+</sup> calcd for C<sub>14</sub>H<sub>12</sub>Cl<sup>+</sup>: 215.0622; found: 215.0616.

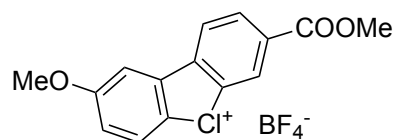

### 2-methoxy-7-(methoxycarbonyl)dibenzo[b,d]chlorol-5-ium tetrafluoroborate **2t**

Following the **GP-B** using **1t** (146 mg, 0.5 mmol) **2t** was obtained as white solid in 77% yield. (140 mg, 0.39 mmol).

**<sup>1</sup>H NMR** (500 MHz, DMSO)  $\delta$  9.22 (d,  $J$  = 1.4 Hz, 1H), 8.74 (d,  $J$  = 8.2 Hz, 1H), 8.52 (d,  $J$  = 9.6 Hz, 1H), 8.44 (dd,  $J$  = 8.2, 1.4 Hz, 1H), 8.25 (d,  $J$  = 2.9 Hz, 1H), 7.53 (dd,  $J$  = 9.6, 2.9 Hz, 1H), 3.97 (s, 3H), 3.97 (s, 3H). **<sup>13</sup>C NMR** (126 MHz, DMSO)  $\delta$  164.1, 161.9, 140.4, 136.1, 132.6, 132.1, 132.1, 132.0, 125.6, 124.1, 123.8, 120.2, 109.9, 56.7, 53.1. **<sup>19</sup>F NMR** (377 MHz, DMSO)  $\delta$  -148.3. **HRMS (ESI)**:  $m/z$  [M-BF<sub>4</sub>]<sup>+</sup> calcd for C<sub>15</sub>H<sub>12</sub>ClO<sub>3</sub><sup>+</sup>: 275.0469; found: 275.0453.

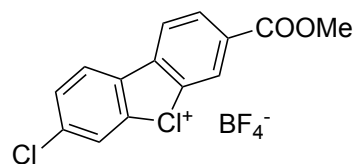

### 3-chloro-7-(methoxycarbonyl)dibenzo[b,d]chlorol-5-ium tetrafluoroborate **2u**

Following the **GP-B** using **1u** (148 mg, 0.5 mmol) **2u** was obtained as white solid in 50% yield. (91 mg, 0.25 mmol).

**<sup>1</sup>H NMR** (500 MHz, DMSO)  $\delta$  9.28 (d,  $J$  = 1.5 Hz, 1H), 8.83 (d,  $J$  = 2.0 Hz, 1H), 8.80 – 8.76 (m, 2H), 8.50 (dd,  $J$  = 8.2, 1.4 Hz, 1H), 8.18 (dd,  $J$  = 8.5, 1.9 Hz, 1H), 3.98 (s, 3H). **<sup>13</sup>C NMR** (126 MHz, DMSO)  $\delta$  164.1, 140.8 (2C), 136.2, 135.3, 132.5, 132.3, 132.3, 130.5, 127.1, 125.8, 123.9, 123.0, 53.2. **<sup>19</sup>F NMR** (377 MHz, DMSO)  $\delta$  -148.3. **HRMS (ESI)**:  $m/z$  [M-BF<sub>4</sub>]<sup>+</sup> calcd for C<sub>14</sub>H<sub>9</sub>Cl<sub>2</sub>O<sub>2</sub><sup>+</sup>: 278.9974; found: 278.9968.

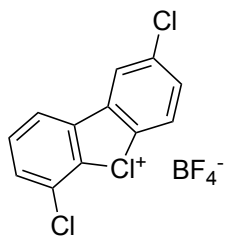

### 2,6-dichlorodibenzo[b,d]chlorol-5-ium tetrafluoroborate **2v**

Following the **GP-B** using **1v** (136 mg, 0.5 mmol) **2v** was obtained as white solid in 81% yield. (139 mg, 0.405 mmol).

$^1\text{H NMR}$  (500 MHz, DMSO)  $\delta$  8.43 – 8.40 (m, 1H), 8.35 (dd,  $J = 8.4, 1.1$  Hz, 1H), 8.10 (dd,  $J = 7.9, 1.1$  Hz, 1H), 8.01 (d,  $J = 2.6$  Hz, 1H), 7.86 (d,  $J = 8.7$  Hz, 1H), 7.80 (dd,  $J = 8.7, 2.6$  Hz, 1H).  $^{13}\text{C NMR}$  (126 MHz, DMSO)  $\delta$  141.7, 141.3, 136.7, 132.8, 132.8, 132.7, 132.6, 132.4, 132.0, 130.9, 130.7, 116.3.  $^{19}\text{F NMR}$  (377 MHz, DMSO)  $\delta$  -148.2. **HRMS (ESI)**:  $m/z$   $[\text{M-BF}_4]^+$  calcd for  $\text{C}_{12}\text{H}_6\text{Cl}_3^+$ : 254.9530; found: 254.9525.

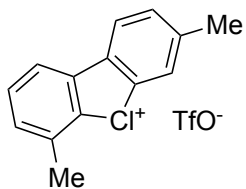

### 3,6-dimethyldibenzo[b,d]chlorol-5-ium trifluoromethanesulfonate **2w**

Following the **GP-B** using **1w** (388 mg, 1.67 mmol) **2w** was obtained as white solid in 56% yield. (343.6 mg, 0.94 mmol).

$^1\text{H NMR}$  (400 MHz, DMSO)  $\delta$  8.57 (d,  $J = 8.1$  Hz, 1H), 8.47 – 8.44 (m, 2H), 7.94 – 7.90 (m, 1H), 7.87 (d,  $J = 7.9$  Hz, 1H), 7.80 (d,  $J = 7.5$  Hz, 1H), 2.74 (s, 3H), 2.60 (s, 3H).  $^{13}\text{C NMR}$  (101 MHz, DMSO)  $\delta$  143.4, 140.3, 140.2, 133.0, 132.5, 132.0, 131.7, 131.6, 129.8, 125.6, 122.9, 122.2, 21.5, 19.0.  $^{19}\text{F NMR}$  (377 MHz, DMSO)  $\delta$  -77.7. **HRMS (ESI)**:  $m/z$   $[\text{M-OTf}]^+$  calcd for  $\text{C}_{14}\text{H}_{12}\text{Cl}^+$ : 215.0622; found: 215.0637.

X-ray suitable crystals of **2w** were obtained through vapor diffusion from DCM/Hexane (Ellipsoid probability at 50%) CCDC 2176957

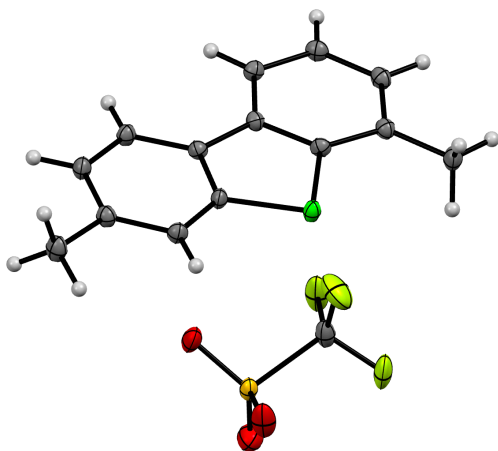



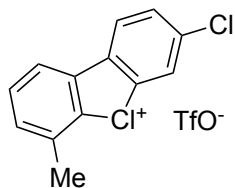

**3-chloro-6-methyldibenzo[b,d]chlorol-5-ium trifluoromethanesulfonate 2x**

Following the **GP-B** using **1x** (596 mg, 2.16 mmol) **2x** was obtained as white solid in 42% yield. (169.7 mg, 0.44 mmol).

**<sup>1</sup>H NMR** (400 MHz, DMSO)  $\delta$  8.83 (d,  $J = 1.9$  Hz, 1H), 8.73 (d,  $J = 8.4$  Hz, 1H), 8.55 – 8.52 (m, 1H), 8.17 (dd,  $J = 8.5, 1.9$  Hz, 1H), 7.95 (t,  $J = 7.6$  Hz, 1H), 7.87 – 7.84 (m, 1H), 2.76 (s, 3H). **<sup>13</sup>C NMR** (101 MHz, DMSO)  $\delta$  141.3, 139.2, 135.4, 133.2, 132.6, 132.2, 131.8, 131.8, 130.8, 126.9, 123.5, 122.6, 19.0. **<sup>19</sup>F NMR** (377 MHz, DMSO)  $\delta$  -77.7. **HRMS (ESI):**  $m/z$  [M-OTf]<sup>+</sup> calcd for C<sub>13</sub>H<sub>9</sub>Cl<sub>2</sub><sup>+</sup>: 235.0076; found: 235.0093.

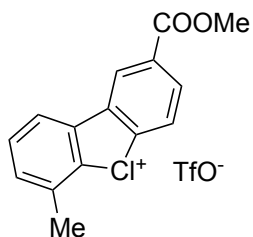

**2-(methoxycarbonyl)-6-methyldibenzo[b,d]chlorol-5-ium trifluoromethanesulfonate 2y**

Following the **GP-B** using **1y** (480 mg, 1.74 mmol) **2y** was obtained as white solid in 60% yield. (424.6 mg, 1.039 mmol).

**<sup>1</sup>H NMR** (400 MHz, DMSO)  $\delta$  9.22 – 9.20 (m, 1H), 8.81 (d,  $J = 9.1$  Hz, 1H), 8.75 – 8.73 (m, 1H), 8.48 (dd,  $J = 9.1, 2.0$  Hz, 1H), 7.97 – 7.93 (m, 1H), 7.88 – 7.86 (m, 1H), 3.99 (s, 3H), 2.76 (s, 3H). **<sup>13</sup>C NMR** (101 MHz, DMSO)  $\delta$  164.6, 142.9, 141.2, 133.5, 133.3, 133.3, 132.5, 132.1, 131.7, 131.0, 126.7, 124.0, 123.4, 53.1, 19.0. **<sup>19</sup>F NMR** (377 MHz, DMSO)  $\delta$  -77.8. **HRMS (ESI):**  $m/z$  [M-OTf]<sup>+</sup> calcd for C<sub>15</sub>H<sub>12</sub>ClO<sub>2</sub><sup>+</sup>: 259.0520; found: 259.0538.

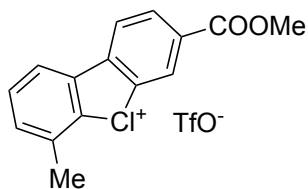

**3-(methoxycarbonyl)-6-methyldibenzo[b,d]chlorol-5-ium trifluoromethanesulfonate 2z**

Following the **GP-B** using **1z** (596 mg, 2.16 mmol) **2z** was obtained as white solid in 59% yield. (520 mg, 1.27 mmol).

**<sup>1</sup>H NMR** (400 MHz, DMSO)  $\delta$  9.30 (s, 1H), 8.82 (d,  $J = 8.2$  Hz, 1H), 8.61 (d,  $J = 7.7$  Hz, 1H), 8.54 (d,  $J = 8.2$  Hz, 1H), 7.99 (t,  $J = 7.6$  Hz, 1H), 7.91 (d,  $J = 7.3$  Hz, 1H), 3.99 (s, 3H), 2.78 (s, 3H). **<sup>13</sup>C NMR** (101 MHz, DMSO)  $\delta$  164.0, 141.6, 140.0, 136.6, 134.1, 132.5, 132.5, 132.2, 131.9, 130.7, 126.2, 124.2, 123.8, 53.2, 19.0. **<sup>19</sup>F NMR** (377 MHz, DMSO)  $\delta$  -77.8. **HRMS (ESI):**  $m/z$  [M-OTf]<sup>+</sup> calcd for C<sub>15</sub>H<sub>12</sub>ClO<sub>2</sub><sup>+</sup>: 259.0520; found: 259.0518.

## Preparation of cyclic diaryl $\lambda^3$ -iodane 4a-OTf

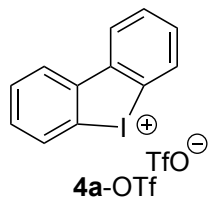

### dibenzo[b,d]iodol-5-ium trifluoromethanesulfonate 4a-OTf

Following a reported procedure<sup>5</sup>: To a stirred solution of 2-iodo-1,1'-biphenyl (1.1 g, 3.93 mmol) in anhydrous CH<sub>2</sub>Cl<sub>2</sub> (10 mL, 0.4 M) was added *m*-CPBA (1.02 g, 5.89 mmol) and TfOH (1.04 mL, 11.78 mmol). The solution was stirred for 1 h at r.t. CH<sub>2</sub>Cl<sub>2</sub> was removed by rotary evaporation before Et<sub>2</sub>O (15 mL) was added, and the mixture was stirred for 20 min, and filtered. The collected solid was washed with Et<sub>2</sub>O three times, dried in vacuo to afford **4a-OTf** (1.68g, 98% yield) as a white powder.

<sup>1</sup>H NMR (400 MHz, DMSO)  $\delta$  8.50 (dd,  $J = 7.9, 1.5$  Hz, 2H), 8.22 (dd,  $J = 8.3, 1.1$  Hz, 2H), 7.87 (td,  $J = 7.6, 1.1$  Hz, 2H), 7.72 (ddd,  $J = 8.5, 7.3, 1.4$  Hz, 2H).

The spectral data correspond to the literature.<sup>5</sup>

## Preparation of cyclic diaryl $\lambda^3$ -bromane 3a-OTf

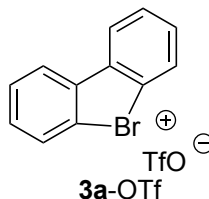

### dibenzo[b,d]bromol-5-ium trifluoromethanesulfonate 3a-OTf

To a stirred solution of 2'-bromo-[1,1'-biphenyl]-2-amine (2 g, 8 mmol) in CH<sub>3</sub>CN (40 mL, 0.2 M) was added *t*-butyl nitrite (1.9 mL, 16.1 mmol, 2 equiv.) and TfOH (1.4 mL, 16.1 mmol, 2 equiv.). The solution was stirred for 1 h at 0 °C then heated to 65 °C for 1h. The cooled reaction was purged in cold Et<sub>2</sub>O (3:1 Et<sub>2</sub>O:CH<sub>3</sub>CN) where a white solid precipitate. The collected solid was washed with Et<sub>2</sub>O three times, dried in vacuo to afford **3a-OTf** (1.8 g, 4.72 mmol, 59 %) as a white powder.

<sup>1</sup>H NMR (400 MHz, DMSO)  $\delta$  8.59 (dd,  $J = 7.8, 1.6$  Hz, 2H), 8.47 (dd,  $J = 8.6, 1.0$  Hz, 2H), 7.95 (td,  $J = 7.6, 1.1$  Hz, 2H), 7.85 (ddd,  $J = 8.7, 7.3, 1.6$  Hz, 2H).

The spectral data correspond to the literature.<sup>6</sup>

## Optimization of the reactions conditions:

### Control Experiments

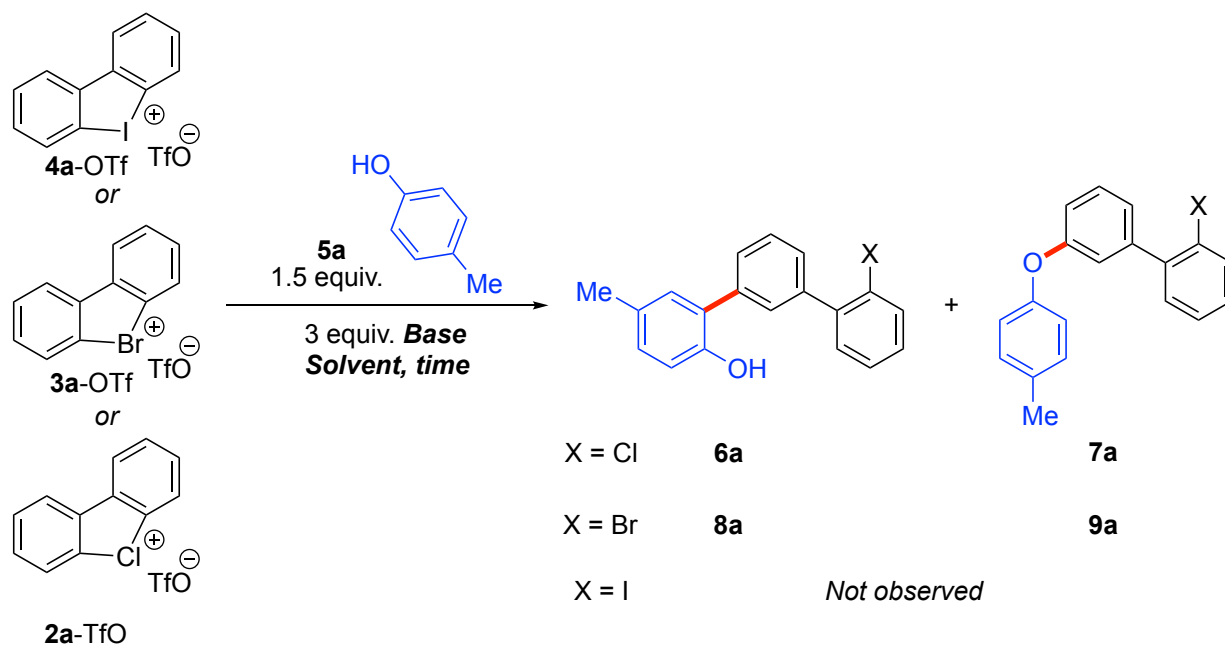

SCHEME S-5

To an oven dried tube equipped with magnetic stirring was charged the hypervalent compound **[X(III)OTf]** (0.15 mmol, 1 equiv.), the corresponding base (0.3 mmol), and the 4-Methylphenol **5a** (24 mg, 0.23 mmol, 1.5 equiv.). The tube is degassed and back refilled with argon. Then the corresponding solvent was added, and the mixture was stirred at room temperature for the corresponding time.

TABLE S-2

| Entry | X(III)-OTf                    | Base                     | Time/Temperature | Solvent              | Isolated Yield 6 or 8       | Isolated Yield 7 or 9 |
|-------|-------------------------------|--------------------------|------------------|----------------------|-----------------------------|-----------------------|
| 1     | I(III)-OTf ( <b>4a-OTf</b> )  |                          |                  |                      | No Conversion/Decomposition |                       |
| 2     | Br(III)-OTf ( <b>3a-OTf</b> ) | $\text{Cs}_2\text{CO}_3$ | 16h at r.t.      | $\text{CHCl}_3$      | 15%                         | 70%                   |
| 3     | Cl(III)-OTf ( <b>2a-TfO</b> ) |                          |                  |                      | 35%                         | 35%                   |
| 4     | I(III)-OTf ( <b>4a-OTf</b> )  |                          |                  |                      | No Conversion/Decomposition |                       |
| 5     | Br(III)-OTf ( <b>3a-OTf</b> ) | $\text{K}_2\text{CO}_3$  | 16h at r.t.      | $\text{CHCl}_3$      | 26%                         | 9%                    |
| 6     | Cl(III)-OTf ( <b>2a-TfO</b> ) |                          |                  |                      | 49%                         | Traces                |
| 7     | I(III)-OTf ( <b>4a-OTf</b> )  |                          |                  |                      | No Conversion/Decomposition |                       |
| 8     | Br(III)-OTf ( <b>3a-OTf</b> ) | $\text{K}_2\text{CO}_3$  | 3h at r.t.       | $\text{H}_2\text{O}$ | No Conversion/Decomposition |                       |
| 9     | Cl(III)-OTf ( <b>2a-TfO</b> ) |                          |                  |                      | 13%                         | 60%                   |

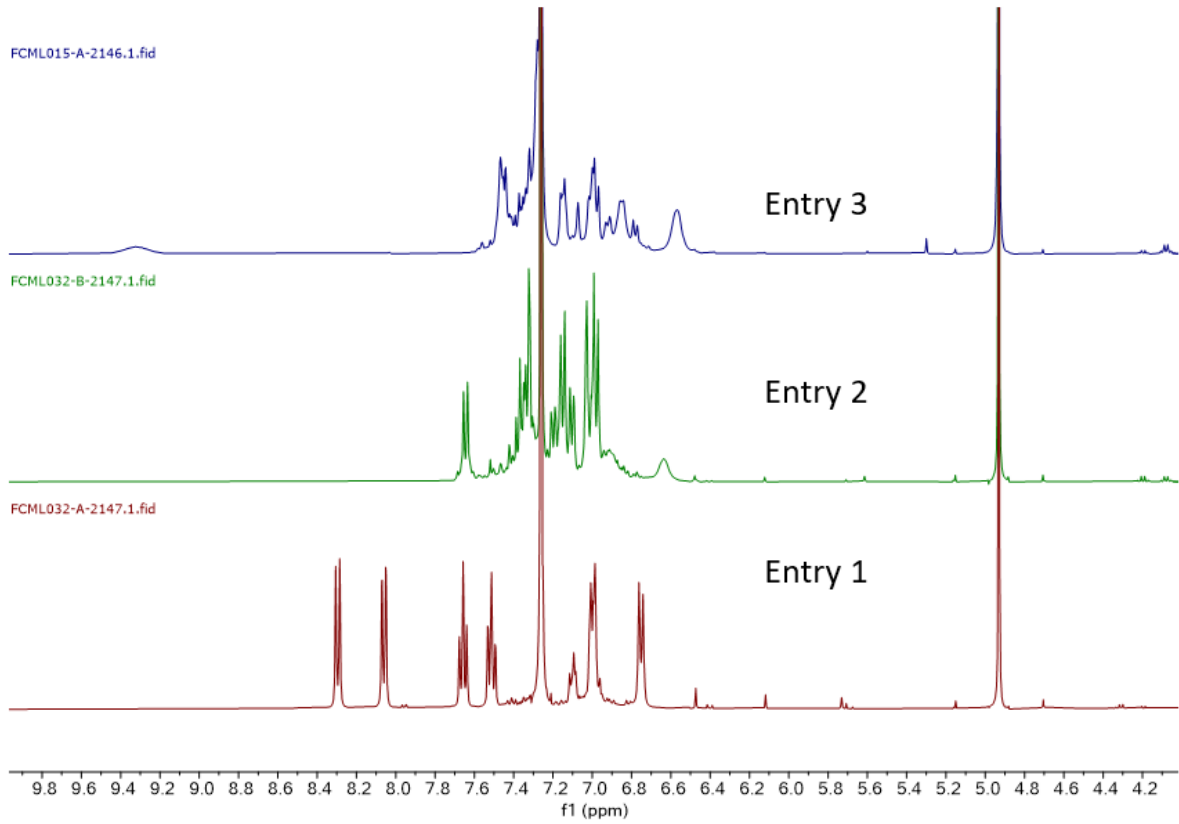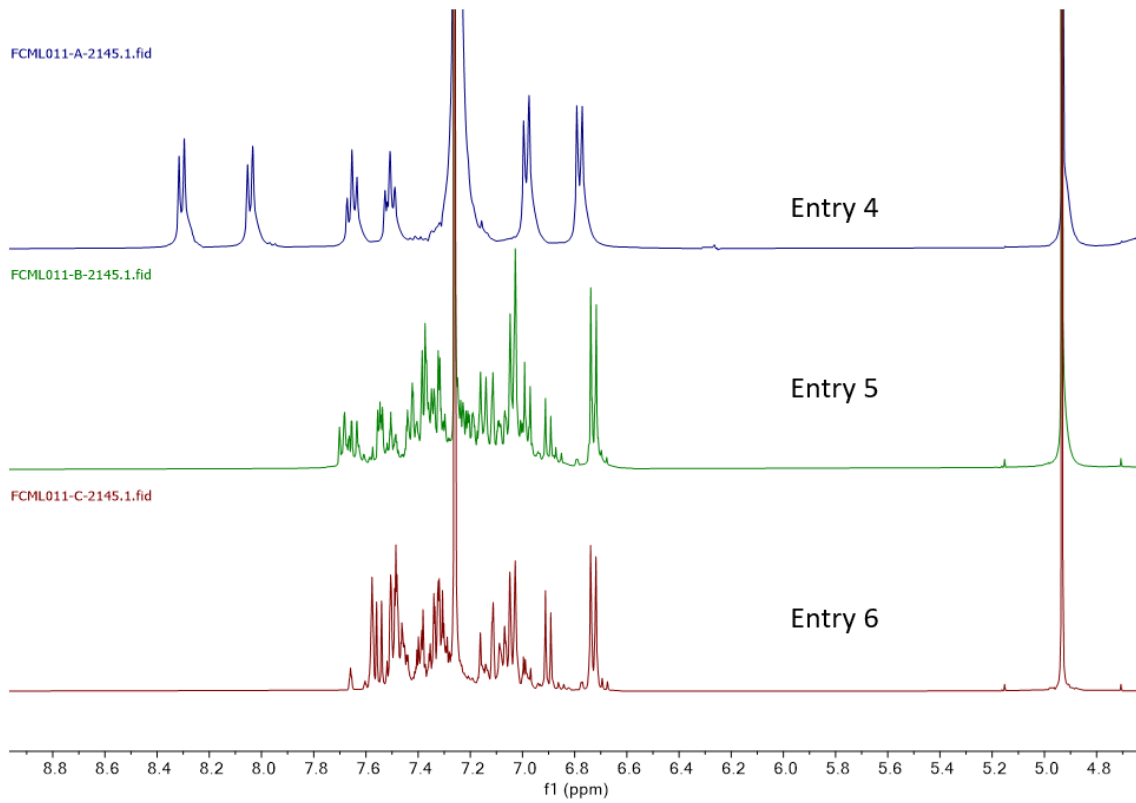

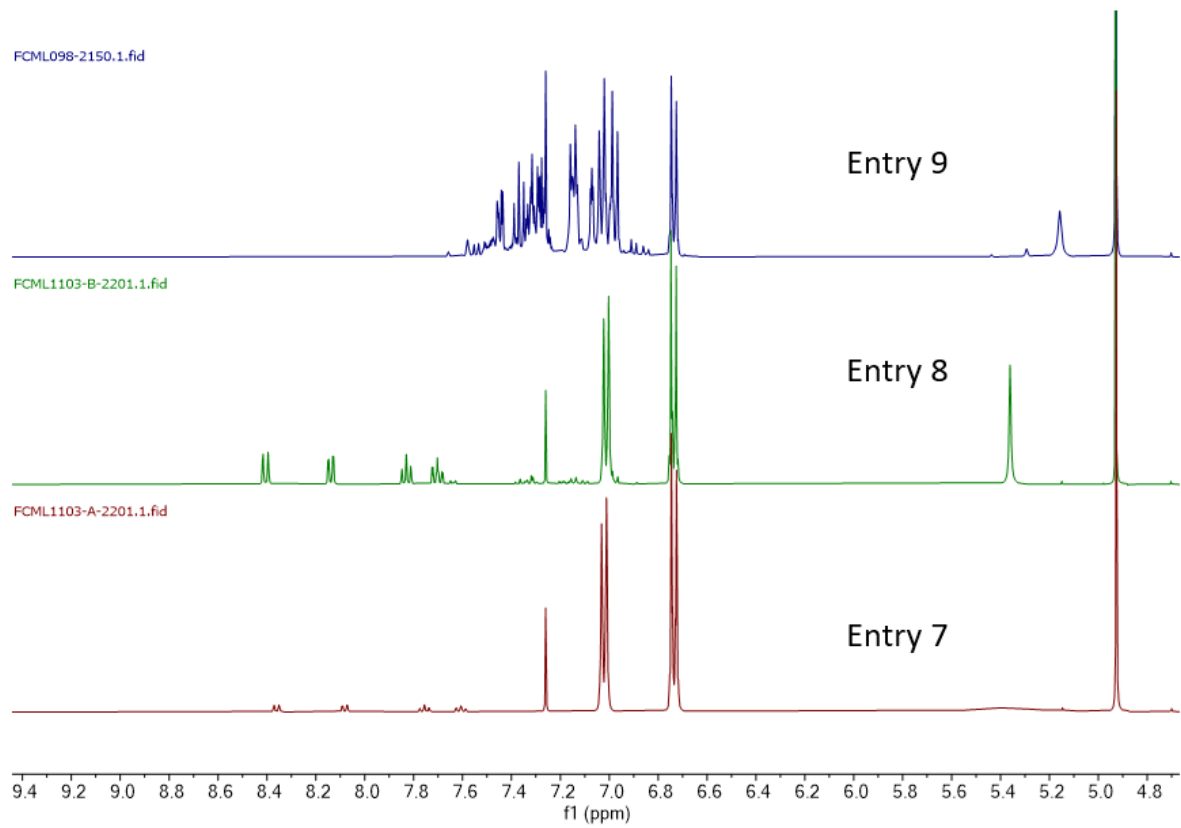

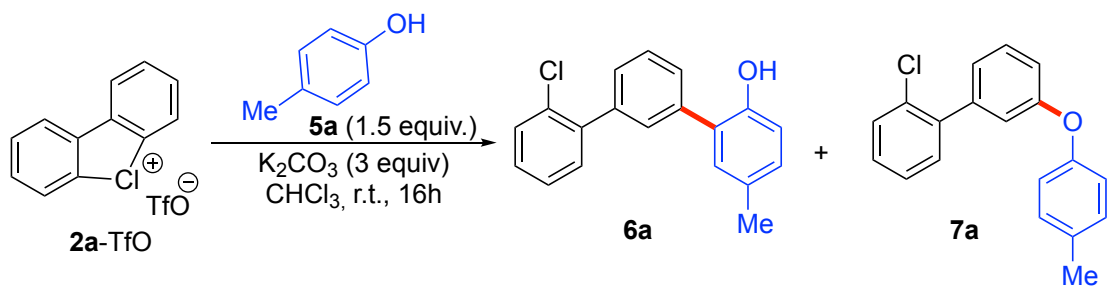

Scheme S-6

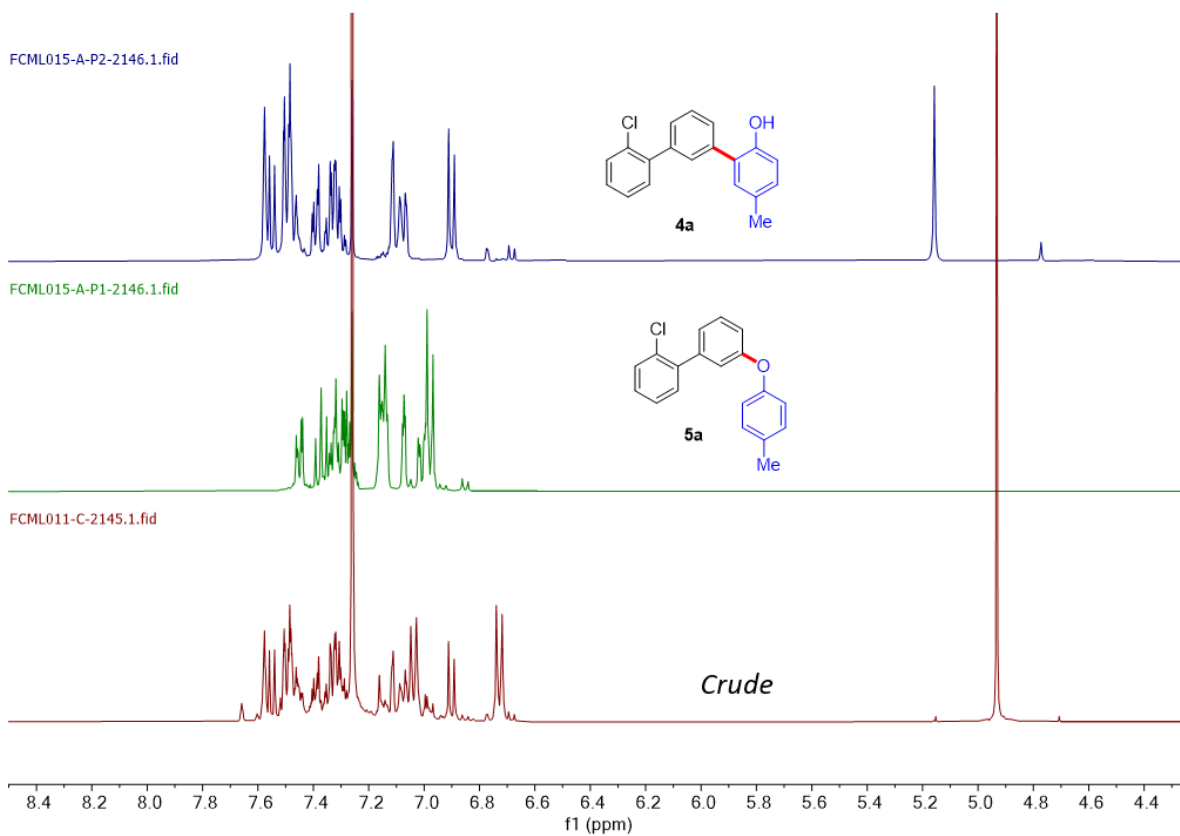

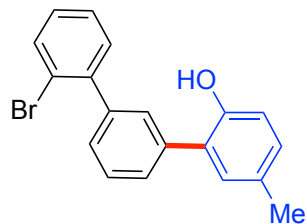

### 2''-bromo-5-methyl-[1,1':3',1''-terphenyl]-2-ol **8a**

**Table S-2; Entry 5:** **8a** was obtained as colorless oil in 26% yield. (13 mg, 0.039 mmol). Regioselective ratio determined by  $^1\text{H NMR}$   $m:o = 86:14$ .

$^1\text{H NMR}$  (500 MHz,  $\text{CDCl}_3$ )  $\delta$  7.69 (d,  $J = 7.9$  Hz, 1H), 7.57 – 7.54 (m, 2H), 7.51 – 7.48 (m, 1H), 7.44 – 7.42 (m, 1H), 7.38 – 7.37 (m, 2H), 7.24 – 7.21 (m, 1H), 7.11 (d,  $J = 2.7$  Hz, 1H), 7.07 (ddd,  $J = 8.2, 2.3, 0.7$  Hz, 1H), 6.90 (d,  $J = 8.1$  Hz, 1H), 5.18 (s, 1H), 2.32 (s, 3H).  $^{13}\text{C NMR}$  (126 MHz,  $\text{CDCl}_3$ )  $\delta$  150.3, 142.0, 141.9, 136.9, 133.2, 131.2, 130.7, 130.0 (2C), 129.8, 129.0, 129.0, 128.7, 128.3, 127.5, 127.4, 122.6, 115.7, 20.5. **HRMS (APCI):**  $m/z$   $[\text{M}+\text{H}]^+$  calcd for  $\text{C}_{19}\text{H}_{16}\text{BrO}^+$ : 339.0379; found: 339.0383.

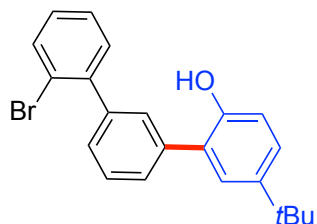

### 2''-bromo-5-(*tert*-butyl)-[1,1':3',1''-terphenyl]-2-ol **8b**

Following the conditions of **Table S-2; Entry 5:** **8b** was obtained as colorless oil in 30% yield. (17 mg, 0.045 mmol). Regioselective ratio determined by  $^1\text{H NMR}$   $m:o = 99:1$ .

$^1\text{H NMR}$  (400 MHz,  $\text{CDCl}_3$ )  $\delta$  7.65 – 7.63 (m, 1H), 7.53 – 7.45 (m, 3H), 7.39 (dt,  $J = 7.4, 1.6$  Hz, 1H), 7.34 – 7.32 (m, 2H), 7.26 – 7.24 (m, 2H), 7.20 – 7.15 (m, 1H), 6.89 (d,  $J = 9.2$  Hz, 1H), 5.18 (brs, 1H), 1.28 (s, 9H).  $^{13}\text{C NMR}$  (101 MHz,  $\text{CDCl}_3$ )  $\delta$  150.3, 143.7, 142.0, 141.9, 137.4, 133.3, 131.3, 130.2, 129.1, 129.0, 128.7, 128.4, 127.6, 127.2, 127.1, 126.3, 122.6, 115.5, 34.2, 31.6. **HRMS (APCI):**  $m/z$   $[\text{M}]^+$  calcd for  $\text{C}_{22}\text{H}_{21}\text{BrO}^+$ : 380.0770; found: 380.0763.

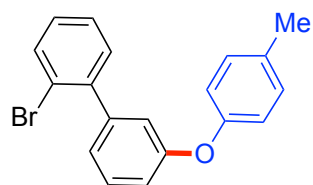

### 2-bromo-3'-(*p*-tolyloxy)-1,1'-biphenyl **9a**

**Table S-2; Entry 2:** **9a** was obtained as colorless oil in 70% yield. (36 mg, 0.105 mmol). Regioselective ratio determined by  $^1\text{H NMR}$   $m:o = 99:1$ .

$^1\text{H NMR}$  (500 MHz,  $\text{CDCl}_3$ )  $\delta$  7.91 (dd,  $J = 8.0, 1.3$  Hz, 1H), 7.64 (t,  $J = 7.9$  Hz, 1H), 7.60 – 7.57 (m, 2H), 7.47 – 7.44 (m, 1H), 7.43 – 7.41 (m, 2H), 7.37 (dt,  $J = 7.6, 1.4$  Hz, 1H), 7.31 – 7.30 (m, 1H), 7.30 – 7.27 (m, 1H), 7.27 – 7.24 (m, 2H), 2.61 (s, 3H).  $^{13}\text{C NMR}$  (126 MHz,  $\text{CDCl}_3$ )  $\delta$  157.4, 154.5, 142.6, 142.0, 133.1, 133.0, 131.1, 130.2 (2C), 129.2, 128.8, 127.3, 123.8, 122.5, 119.3, 119.2 (2C), 117.5, 20.7. **HRMS (APCI):**  $m/z$   $[\text{M}]^+$  calcd for  $\text{C}_{19}\text{H}_{15}\text{BrO}^+$ : 338.0301; found: 338.0301.

## Optimization of metal-free CDC C-C bond formation with cyclic diaryl $\lambda^3$ -chloranes

Table S-3

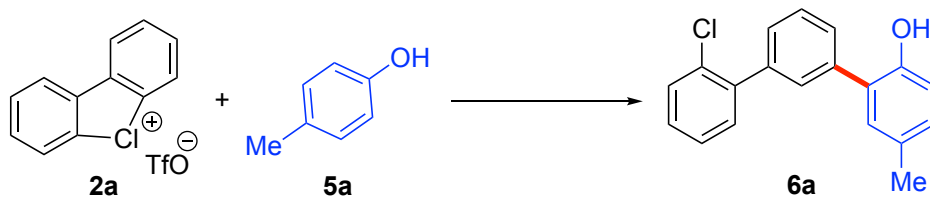

To an oven dry vial was charged **2a**-OTf (50.5 mg, 0.15 mmol, 1 equiv.) and the base. The vial was evacuated and back refilled with Argon three times. Subsequently, under argon, **5a** was added followed by the desired solvent. The resulting mixture was stirred, and the conversion was verified by GCMS and TLC. The  $^1\text{H}$  NMR of the crude was recorded, yields were calculated using  $\text{CH}_2\text{Br}_2$  as internal standard (20  $\mu\text{L}$ , 0.284 mmol). (<sup>a</sup> Isolated yields)

| <b>2a</b>                 | Eq of <b>2a</b> | Eq of <b>5a</b> | Base                     | Eq of base | Solvent (M)                | Time;temp. | NMR Yield of <b>6a</b> <sup>o</sup> % |
|---------------------------|-----------------|-----------------|--------------------------|------------|----------------------------|------------|---------------------------------------|
| <b>2a</b> -OTf            | 1               | 1.5             | $\text{K}_2\text{CO}_3$  | 3          | $\text{CHCl}_3$            | 16h; r.t.  | 66% (49%) <sup>a</sup>                |
| <b>2a</b> -OTf            | 1               | 1.5             | -                        | -          | $\text{CHCl}_3$            | 16h; r.t.  | No Conversion                         |
| <b>2a</b> - $\text{BF}_4$ | 1               | 1.5             | $\text{K}_2\text{CO}_3$  | 3          | $\text{CHCl}_3$            | 16h; r.t.  | 61%                                   |
| <b>2a</b> - $\text{PF}_6$ | 1               | 1.5             | $\text{K}_2\text{CO}_3$  | 3          | $\text{CHCl}_3$            | 16h; r.t.  | 62%                                   |
| <b>2a</b> -OMs            | 1               | 1.5             | $\text{K}_2\text{CO}_3$  | 3          | $\text{CHCl}_3$            | 16h; r.t.  | 54%                                   |
| <b>2a</b> -OTf            | 1               | 1.5             | $\text{Cs}_2\text{CO}_3$ | 3          | $\text{CHCl}_3$            | 16h; r.t.  | 47% (35%) <sup>a</sup>                |
| <b>2a</b> -OTf            | 1               | 1.5             | $\text{Li}_2\text{CO}_3$ | 3          | $\text{CHCl}_3$            | 16h; r.t.  | No Conv.                              |
| <b>2a</b> -OTf            | 1               | 1.5             | $\text{Na}_2\text{CO}_3$ | 3          | $\text{CHCl}_3$            | 16h; r.t.  | 57%                                   |
| <b>2a</b> -OTf            | 1               | 1.5             | $\text{KHCO}_3$          | 3          | $\text{CHCl}_3$            | 16h; r.t.  | 37%                                   |
| <b>2a</b> -OTf            | 1               | 1.5             | KOH                      | 3          | $\text{CHCl}_3$            | 16h; r.t.  | Decomposition                         |
| <b>2a</b> -OTf            | 1               | 1.5             | KtBuO                    | 3          | $\text{CHCl}_3$            | 16h; r.t.  | 37%                                   |
| <b>2a</b> -OTf            | 1               | 1.5             | $\text{K}_2\text{CO}_3$  | 3          | $\text{CHCl}_3$<br>(0.05M) | 16h; r.t.  | 64%                                   |
| <b>2a</b> -OTf            | 1               | 1.5             | $\text{K}_2\text{CO}_3$  | 3          | $\text{CHCl}_3$ (0.2M)     | 16h; r.t.  | 56%                                   |
| <b>2a</b> -OTf            | 1               | 1.2             | $\text{K}_2\text{CO}_3$  | 3          | $\text{CHCl}_3$            | 16h; r.t.  | 63%                                   |
| <b>2a</b> -OTf            | 1.2             | 1               | $\text{K}_2\text{CO}_3$  | 3          | $\text{CHCl}_3$            | 16h; r.t.  | 58%                                   |
| <b>2a</b> -OTf            | 1               | 1.5             | $\text{K}_2\text{CO}_3$  | 3          | DCM                        | 16h; r.t.  | 64%                                   |
| <b>2a</b> -OTf            | 1               | 1.5             | $\text{K}_2\text{CO}_3$  | 3          | Acetone                    | 16h; r.t.  | Decomposition                         |
| <b>2a</b> -OTf            | 1               | 1.5             | $\text{K}_2\text{CO}_3$  | 3          | $\text{CH}_3\text{CN}$     | 16h; r.t.  | 18%                                   |
| <b>2a</b> -OTf            | 1               | 1.5             | $\text{K}_2\text{CO}_3$  | 3          | Toluene                    | 16h; r.t.  | 68% (45%) <sup>a</sup>                |
| <b>2a</b> -OTf            | 1               | 1.5             | $\text{K}_2\text{CO}_3$  | 3          | Dioxane                    | 16h; r.t.  |                                       |
| <b>2a</b> -OTf            | 1               | 1.5             | $\text{K}_2\text{CO}_3$  | 3          | DME                        | 16h; r.t.  |                                       |
| <b>2a</b> -OTf            | 1               | 1.5             | $\text{K}_2\text{CO}_3$  | 3          | $\text{CHCl}_3$            | 16h; 0°C   | 37%                                   |
| <b>2a</b> -OTf            | 1               | 1.5             | $\text{K}_2\text{CO}_3$  | 3          | $\text{CHCl}_3$            | 16h; 50°C  | 45%                                   |



|               |          |            |                                    |          |                         |                 |            |
|---------------|----------|------------|------------------------------------|----------|-------------------------|-----------------|------------|
| <b>2a-OTf</b> | 1        | 1.5        | K <sub>2</sub> CO <sub>3</sub>     | 3        | CHCl <sub>3</sub>       | 16h; 30°C       | 37%        |
| <b>2a-OTf</b> | 1        | 1.5        | K <sub>2</sub> CO <sub>3</sub>     | 1.5      | CHCl <sub>3</sub>       | 16h; r.t.       | 56%        |
| <b>2a-OTf</b> | 1        | 1.5        | K <sub>2</sub> CO <sub>3</sub>     | 2        | CHCl <sub>3</sub>       | 16h; r.t.       | 62%        |
| <b>2a-OTf</b> | 1        | 1.5        | K <sub>2</sub> CO <sub>3</sub>     | 5        | CHCl <sub>3</sub>       | 16h; r.t.       | 68%        |
| <b>2a-OTf</b> | 1        | 1.5        | K <sub>2</sub> CO <sub>3</sub>     | 3        | CHCl <sub>3</sub>       | 9h; r.t.        | 59%        |
| <b>2a-OTf</b> | 1        | 1.5        | K <sub>2</sub> CO <sub>3</sub>     | 3        | CHCl <sub>3</sub>       | 6h; r.t.        | 66%        |
| <b>2a-OTf</b> | <i>1</i> | <i>1.5</i> | <i>K<sub>2</sub>CO<sub>3</sub></i> | <i>3</i> | <i>CHCl<sub>3</sub></i> | <i>3h; r.t.</i> | <i>66%</i> |
| <b>2a-OTf</b> | 1        | 1.5        | K <sub>2</sub> CO <sub>3</sub>     | 3        | CHCl <sub>3</sub>       | 1.5h; r.t.      | 54%        |

## Optimization of metal free C-O arylation of phenols with cyclic diaryl $\lambda^3$ -chloride

Table S-4

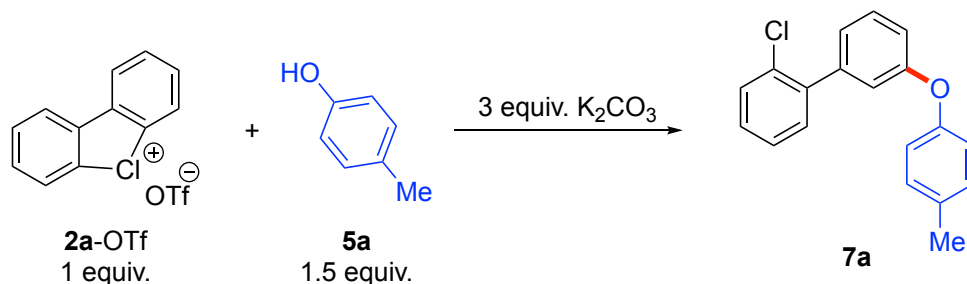

To an oven dry vial was charged **2a-OTf** (50.5 mg, 0.15 mmol, 1 equiv.) and  $K_2CO_3$  (62 mg, 0.45 mmol, 3 equiv). The vial was evacuated and back refilled with Argon three times. Subsequently, under argon, the **5a** (24 mg, 0.23 mmol, 1.5 equiv.) was added followed by the solvent. The resulting mixture was stirred at room temperature for 16 hours at the desired temperature. The conversion was verified by GCMS and TLC. The mixture was extracted with EtOAc (3 mL x 3 times). The extracts were combined, dried over  $MgSO_4$ , filtered, and concentrated. The  $^1H$  NMR of the crude was recorded, yields were calculated using  $CH_2Br_2$  as internal standard (20  $\mu$ L, 0.284 mmol). (<sup>a</sup> Isolated yields)

| Base       | Solvent (M)                     |       | time@temp. | NMR Yield of <b>7a</b> |
|------------|---------------------------------|-------|------------|------------------------|
| $K_2CO_3$  | $H_2O$                          | 0.1M  | 16h; r.t.  | 84% (60%)              |
| $KHCO_3$   | $H_2O$                          | 0.1M  | 16h; r.t.  | 51%                    |
| $Li_2CO_3$ | $H_2O$                          | 0.1M  | 16h; r.t.  | 76%                    |
| $Na_2CO_3$ | $H_2O$                          | 0.1M  | 16h; r.t.  | 72%                    |
| $K_2CO_3$  | $H_2O$                          | 0.2M  | 16h; r.t.  | 84%                    |
| $K_2CO_3$  | $H_2O$                          | 0.05M | 16h; r.t.  | 80%                    |
| $K_2CO_3$  | $H_2O$                          | 0.1M  | 16h; 50°C  | 74%                    |
| $K_2CO_3$  | $H_2O$ (1mL) + Acetone (0.5mL)  | 0.1M  | 16h; r.t.  | 78%                    |
| $K_2CO_3$  | $H_2O$ (1mL) + $CH_3CN$ (0.5mL) | 0.1M  | 16h; r.t.  | 80%                    |
| -          | $H_2O$ (1mL) + $CH_3CN$ (0.5mL) | 0.1M  | 16h; r.t.  | No conversion          |

## General procedure C: Metal-free CDC C-C bond formation with cyclic diaryl $\lambda^3$ -chloranes **5a-u**

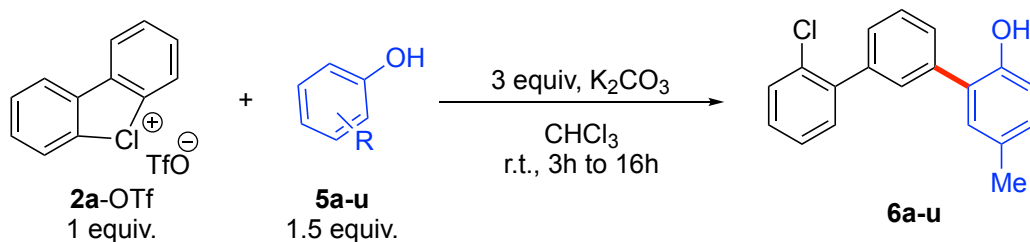

SCHEME S-7

To an oven dry vial was charged **2a-OTf** (50.5 mg, 0.15 mmol, 1 equiv.) and  $K_2CO_3$  (62 mg, 0.45 mmol, 3 equiv). The vial was evacuated and back refilled with Argon three times. Subsequently, under argon, the desired phenol **5a-u** (1.5 equiv) was added followed by  $CHCl_3$  (1.5 mL, 0.1M or 1 mL, 0.15M as specify). The resulting heterogeneous mixture was stirred at room temperature for 3 to 16 hours. The conversion was verified by GCMS and TLC. The mixture was diluted with EtOAc (3 mL) and filtered. After removal of volatile components, the crude was purified through Prep-TLC.

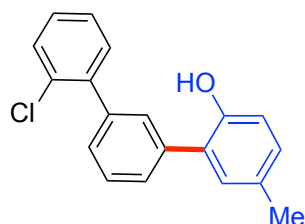

### 2''-chloro-5-methyl-[1,1':3',1''-terphenyl]-2-ol **6a**

Following the GP-C using **2a-OTf** (50.5 mg, 0.15 mmol) and *p*-cresol **5a** (24 mg, 0.23 mmol) in  $CHCl_3$  (1.5 mL, 0.1M) **6a** was obtained as colorless oil in 49% yield. (21.2 mg, 0.072 mmol). Regioselective ratio determined by  $^1H$ NMR *m:o* = 90:10.

**3 mmol scale:** To a round bottom flask was charged **2a-OTf** (1 g, 3 mmol), *p*-cresol **5a** (500 mg, 4.5 mmol) and  $K_2CO_3$  (1.24 g, 9 mmol.) followed by  $CHCl_3$  (20 mL, 0.15 M). The resulting mixture was stirred for 30 hours at room temperature. After a standard treatment **6a** was obtained as colorless oil in 64% yield. (567 mg, 1.92 mmol).

$^1H$  NMR (500 MHz,  $CDCl_3$ )  $\delta$  7.58 – 7.54 (m, 2H), 7.51 – 7.50 (m, 1H), 7.49 – 7.46 (m, 2H), 7.40 – 7.38 (m, 1H), 7.36 – 7.29 (m, 2H), 7.12 (d,  $J$  = 2.7 Hz, 1H), 7.08 (ddd,  $J$  = 8.2, 2.3, 0.8 Hz, 1H), 6.90 (d,  $J$  = 8.2 Hz, 1H), 5.18 (brs, 1H), 2.33 (s, 3H).  $^{13}C$  NMR (126 MHz,  $CDCl_3$ )  $\delta$  150.2, 140.2, 139.9, 137.0, 132.4, 131.3, 130.7, 130.1, 130.0, 130.0, 129.7, 129.0, 128.8, 128.8, 128.2, 127.4, 126.9, 115.7, 20.5. HRMS (APCI):  $m/z$   $[M]^+$  calcd for  $C_{19}H_{15}ClO^+$ : 294.0806; found: 294.0787.

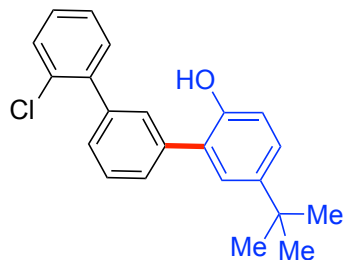

### 5-(tert-butyl)-2''-chloro-[1,1':3',1''-terphenyl]-2-ol **6b**

Following the GP-C using **2a**-OTf (50.5 mg, 0.15 mmol) and 4-tert-butylphenol **5b** (33.8 mg, 0.23 mmol) in CHCl<sub>3</sub> (1.5 mL, 0.1M) **6b** was obtained as colorless oil in 70% yield. (35.5 mg, 0.105 mmol). Regioselective ratio determined by <sup>1</sup>HNMR *m:o* = 92:8.

<sup>1</sup>H NMR (500 MHz, CDCl<sub>3</sub>) δ 7.55 (t, *J* = 1.8 Hz, 1H), 7.52 (t, *J* = 7.5 Hz, 1H), 7.48 – 7.43 (m, 3H), 7.36 (dd, *J* = 7.5, 1.8 Hz, 1H), 7.31 – 7.25 (m, 4H), 6.90 (d, *J* = 9.2 Hz, 1H), 5.14 (brs, 1H), 1.29 (s, 9H). <sup>13</sup>C NMR (126 MHz, CDCl<sub>3</sub>) δ 150.2, 143.6, 140.2, 139.9, 137.4, 132.5, 131.4, 130.2, 130.1, 129.0, 128.8, 128.7, 128.3, 127.1, 127.1, 127.0, 126.2, 115.4, 34.2, 31.5 (3C). HRMS (APCI): *m/z* [M]<sup>+</sup> calcd for C<sub>22</sub>H<sub>21</sub>ClO<sup>+</sup>: 336.1275; found: 336.1255.

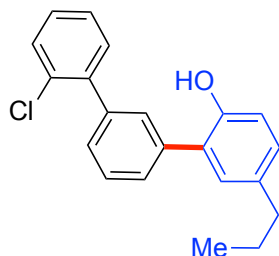

### 2''-chloro-5-propyl-[1,1':3',1''-terphenyl]-2-ol **6c**

Following the GP-C using **2a**-OTf (50.5 mg, 0.15 mmol) and 4-propylphenol **5c** (31 μL, 0.23 mmol) in CHCl<sub>3</sub> (1.5 mL, 0.1M) **6c** was obtained as colorless oil in 53% yield. (25.4 mg, 0.079 mmol). Regioselective ratio determined by <sup>1</sup>HNMR *m:o* = 94:6.

<sup>1</sup>H NMR (500 MHz, CDCl<sub>3</sub>) δ 7.73 (t, *J* = 1.8 Hz, 1H), 7.72 – 7.69 (m, 1H), 7.66 – 7.61 (m, 3H), 7.54 (dd, *J* = 7.2, 2.3 Hz, 1H), 7.50 – 7.44 (m, 2H), 7.26 (d, *J* = 2.3 Hz, 1H), 7.23 (dd, *J* = 8.1, 2.3 Hz, 1H), 7.07 (d, *J* = 8.1 Hz, 1H), 5.32 (brs, 1H), 2.73 (m, 2H), 1.79 (h, *J* = 7.5 Hz, 2H), 1.10 (t, *J* = 7.3 Hz, 3H). <sup>13</sup>C NMR (126 MHz, CDCl<sub>3</sub>) δ 150.4, 140.2, 139.9, 137.2, 135.1, 132.5, 131.3, 130.1 (2C), 130.0, 129.2, 129.0, 128.8, 128.7, 128.3, 127.4, 126.9, 115.7, 37.2, 24.8, 13.8. HRMS (APCI): *m/z* [M]<sup>+</sup> calcd for C<sub>21</sub>H<sub>19</sub>ClO<sup>+</sup>: 322.1119; found: 322.1116.

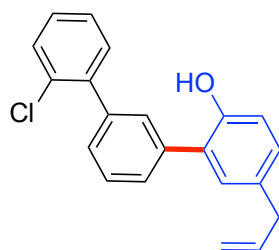

### 5-allyl-2''-chloro-[1,1':3',1''-terphenyl]-2-ol **6d**

Following the GP-C using **2a**-OTf (50.5 mg, 0.15 mmol) and 4-(prop-2-en-1-yl)phenol **5d** (30 mg, 0.23 mmol) in CHCl<sub>3</sub> (1.5 mL, 0.1M) **6d** was obtained as colorless oil in 64% yield. (30.7 mg, 0.096 mmol). Regioselective ratio determined by <sup>1</sup>HNMR *m:o* = 92:8. (2 mmol scale: 190 mg, 0.6 mmol, 30%)

<sup>1</sup>H NMR (500 MHz, CDCl<sub>3</sub>) δ 7.58 (t, *J* = 1.8 Hz, 1H), 7.56 (d, *J* = 7.6 Hz, 1H), 7.51 – 7.47 (m, 3H), 7.40 – 7.38 (m, 1H), 7.36 – 7.29 (m, 2H), 7.13 (d, *J* = 2.3 Hz, 1H), 7.10 (dd, *J* = 8.2, 2.3 Hz, 1H), 6.94 (d, *J* = 8.2 Hz, 1H), 5.99 (ddt, *J* = 16.8, 10.1, 6.7 Hz, 1H), 5.21 (brs, 1H), 5.12 – 5.05 (m, 2H), 3.37 (d, *J* = 6.7 Hz, 2H). <sup>13</sup>C NMR (126 MHz, CDCl<sub>3</sub>) δ 150.8, 140.3, 139.9, 137.7, 137.0, 132.4, 132.4, 131.3, 130.3, 130.1, 130.0, 129.3, 129.0, 128.8 (2C), 128.3, 127.6, 126.9, 115.9, 115.7, 39.4. HRMS (APCI): *m/z* [M]<sup>+</sup> calcd for C<sub>21</sub>H<sub>17</sub>ClO<sup>+</sup>: 320.0962; found: 320.0952.

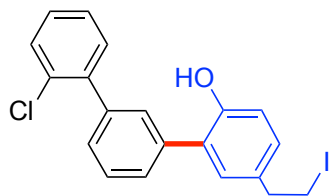

### 2''-chloro-5-(2-iodoethyl)-[1,1':3',1''-terphenyl]-2-ol **6e**

Following the GP-C using **2a**-OTf (50.5 mg, 0.15 mmol) and 4-(2-iodoethyl)phenol **5e** (55.8 mg, 0.23 mmol) in CHCl<sub>3</sub> (1.5 mL, 0.1M) **6e** was obtained as colorless oil in 30% yield. (19.5 mg, 0.045 mmol). Regioselective ratio determined by <sup>1</sup>HNMR *m:o* = 89:11.

<sup>1</sup>H NMR (400 MHz, CDCl<sub>3</sub>) δ 7.59 – 7.55 (m, 2H), 7.51 – 7.47 (m, 3H), 7.40 – 7.38 (m, 1H), 7.36 – 7.29 (m, 2H), 7.13 (d, *J* = 2.3 Hz, 1H), 7.10 (dd, *J* = 8.2, 2.3 Hz, 1H), 6.95 (d, *J* = 8.2 Hz, 1H), 5.28 (s, 1H), 3.37 – 3.33 (m, 2H), 3.15 (t, *J* = 7.8 Hz, 2H). <sup>13</sup>C NMR (101 MHz, CDCl<sub>3</sub>) δ 151.4, 140.4, 139.8, 136.6, 133.1, 132.4, 131.3, 130.1, 130.1, 130.1, 129.1, 129.1, 129.0, 128.9, 128.2, 127.9, 127.0, 116.1, 39.6, 6.2. HRMS (APCI): *m/z* [M]<sup>+</sup> calcd for C<sub>20</sub>H<sub>17</sub>ClO<sup>+</sup>: 433.9929; found: 433.9910.

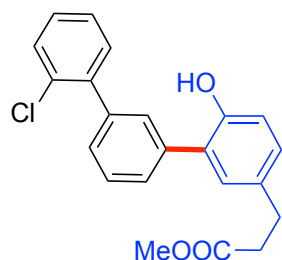

### methyl 3-(2''-chloro-6-hydroxy-[1,1':3',1''-terphenyl]-3-yl)propanoate **6f**

Following the GP-C using **2a**-OTf (50.5 mg, 0.15 mmol) and methyl 3-(4-hydroxyphenyl)propanoate **5f** (41 mg, 0.23 mmol) in CHCl<sub>3</sub> (1.5 mL, 0.1M) **6f** was obtained as colorless oil in 57% yield. (31.6 mg, 0.086 mmol). Regioselective ratio determined by <sup>1</sup>HNMR *m:o* = 90:10.

<sup>1</sup>H NMR (500 MHz, CDCl<sub>3</sub>) δ 7.57 – 7.54 (m, 2H), 7.50 – 7.46 (m, 3H), 7.40 – 7.38 (m, 1H), 7.35 – 7.29 (m, 2H), 7.13 (d, *J* = 2.3 Hz, 1H), 7.10 (dd, *J* = 8.2, 2.4 Hz, 1H), 6.92 (d, *J* = 8.1 Hz, 1H), 5.29 (brs, 1H), 3.67 (s, 3H), 2.93 (t, *J* = 7.8 Hz, 2H), 2.65 – 2.62 (m, 2H). <sup>13</sup>C NMR (126 MHz, CDCl<sub>3</sub>) δ 173.4, 151.0, 140.3, 139.9, 136.9, 132.8, 132.4, 131.3, 130.1, 130.0 (2C), 129.0, 129.0, 128.8, 128.8, 128.2, 127.7, 126.9, 116.0, 51.6, 36.0, 30.1. HRMS (APCI): *m/z* [M]<sup>+</sup> calcd for C<sub>22</sub>H<sub>19</sub>ClO<sub>3</sub><sup>+</sup>: 366.1017; found: 366.1007.

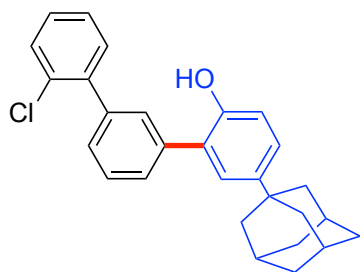

### 5-((3r,5r,7r)-adamantan-1-yl)-2''-chloro-[1,1':3',1''-terphenyl]-2-ol **6g**

Following the GP-C using **2a**-OTf (50.5 mg, 0.15 mmol) and 4-(adamantan-1-yl)phenol **5g** (51.4 mg, 0.23 mmol) in CHCl<sub>3</sub> (1 mL, 0.15 M) for 48 hours, **6g** was obtained as colorless oil in 72% yield. (45 mg, 0.108 mmol). Regioselective ratio determined by <sup>1</sup>HNMR *m:o* = 95:5.

<sup>1</sup>H NMR (400 MHz, CDCl<sub>3</sub>) δ 7.58 – 7.53 (m, 2H), 7.51 – 7.45 (m, 3H), 7.40 – 7.37 (m, 1H), 7.35 – 7.29 (m, 2H), 7.28 – 7.25 (m, 2H), 6.94 (d, *J* = 9.2 Hz, 1H), 5.17 (s, 1H), 2.09 – 2.07 (brs, 3H), 1.91 (d, *J* = 3.1 Hz, 6H), 1.77 – 1.74 (m, 6H). <sup>13</sup>C NMR (101 MHz, CDCl<sub>3</sub>) δ 150.2, 144.0, 140.2, 140.0, 137.5, 132.5, 131.4, 130.2, 130.0, 129.0, 128.8, 128.7, 128.3, 127.1, 126.9, 126.8, 125.7, 115.5, 43.4 (3C), 36.8 (3C), 35.7, 29.0 (3C). HRMS (APCI): *m/z* [M]<sup>+</sup> calcd for C<sub>28</sub>H<sub>27</sub>ClO<sup>+</sup>: 414.1745; found: 414.1754.

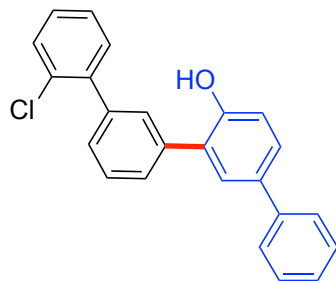

### 2'''-chloro-[1,1':3',1'':3'',1'''-quaterphenyl]-4'-ol **6h**

Following the **GP-C** using **2a-OTf** (50.5 mg, 0.15 mmol) and 4-phenylphenol **5h** (38 mg, 0.23 mmol) in  $\text{CHCl}_3$  (1.5 mL, 0.1M) **6h** was obtained as colorless oil in 52% yield. (25.4 mg, 0.071 mmol). Regioselective ratio determined by  $^1\text{H NMR}$   $m:o = 89:11$ .

$^1\text{H NMR}$  (500 MHz,  $\text{CDCl}_3$ )  $\delta$  7.57 – 7.42 (m, 9H), 7.37 – 7.33 (m, 3H), 7.29 – 7.23 (m, 3H), 7.01 (d,  $J = 8.4$  Hz, 1H), 5.29 (brs, 1H).  $^{13}\text{C NMR}$  (126 MHz,  $\text{CDCl}_3$ )  $\delta$  152.1, 140.6, 140.4, 139.8, 136.8, 134.1, 132.4, 131.3, 130.2, 130.1, 129.2, 129.0, 129.0, 128.9, 128.7 (2C), 128.3, 128.0, 127.9, 127.0, 126.8, 126.7 (2C), 116.4. **HRMS (APCI)**:  $m/z$   $[\text{M}]^+$  calcd for  $\text{C}_{24}\text{H}_{17}\text{ClO}^+$ : 356.0962; found: 356.0943.

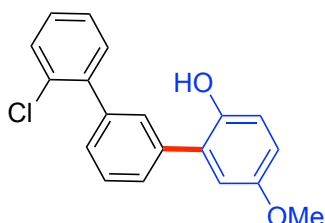

### 2''-chloro-5-methoxy-[1,1':3',1''-terphenyl]-2-ol **6i**

Following the **GP-C** using **2a-OTf** (50.5 mg, 0.15 mmol) and 4-Methoxyphenol **5i** (28 mg, 0.23 mmol) in  $\text{CHCl}_3$  (1.5 mL, 0.1M) **6i** was obtained as colorless oil in 53% yield. (24.5 mg, 0.079 mmol). Regioselective ratio determined by  $^1\text{H NMR}$   $m:o = 89:11$ .

$^1\text{H NMR}$  (500 MHz,  $\text{CDCl}_3$ )  $\delta$  7.59 (t,  $J = 1.8$  Hz, 1H), 7.57 (t,  $J = 7.6$  Hz, 1H), 7.52 – 7.47 (m, 3H), 7.40 – 7.38 (m, 1H), 7.36 – 7.29 (m, 2H), 6.93 (dd,  $J = 8.7, 0.5$  Hz, 1H), 6.87 (d,  $J = 2.9$  Hz, 1H), 6.84 (dd,  $J = 8.6, 3.1$  Hz, 1H), 4.98 (brs, 1H), 3.80 (s, 3H).  $^{13}\text{C NMR}$  (126 MHz,  $\text{CDCl}_3$ )  $\delta$  153.7, 146.5, 140.3, 139.8, 137.0, 132.4, 131.3, 130.1, 130.1, 129.1, 128.9, 128.8, 128.3, 128.2, 127.0, 116.7, 115.2, 114.8, 55.8. **HRMS (APCI)**:  $m/z$   $[\text{M}]^+$  calcd for  $\text{C}_{19}\text{H}_{15}\text{ClO}_2^+$ : 310.0755; found: 310.0742.

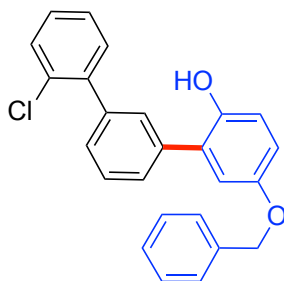

### 5-(benzyloxy)-2''-chloro-[1,1':3',1''-terphenyl]-2-ol **6j**

Following the **GP-C** using **2a-OTf** (50.5 mg, 0.15 mmol) and 4-(benzyloxy)phenol **5j** (45 mg, 0.23 mmol) in  $\text{CHCl}_3$  (1 mL, 0.15 M) for 36 hours **6j** was obtained as pale yellow oil in 69% yield. (40 mg, 0.103 mmol). Regioselective ratio determined by  $^1\text{H-NMR}$   $m:o = 92:8$ .

$^1\text{H NMR}$  (500 MHz,  $\text{CDCl}_3$ )  $\delta$  7.46 – 7.45 (m, 1H), 7.43 (d,  $J = 7.5$  Hz, 1H), 7.39 – 7.35 (m, 3H), 7.32 – 7.31 (m, 2H), 7.27 – 7.25 (m, 3H), 7.23 – 7.17 (m, 4H), 6.84 – 6.79 (m, 2H), 4.92 (s, 2H), 4.90 (brs, 1H).  $^{13}\text{C NMR}$  (126 MHz,  $\text{CDCl}_3$ )  $\delta$  152.9, 146.7, 140.3, 139.8, 137.2, 136.9, 132.4, 131.3, 130.1, 130.0, 129.0, 128.9, 128.8, 128.5 (2C), 128.3, 128.2, 127.9, 127.5 (2C), 127.0, 116.7, 116.5, 115.8, 70.8. **HRMS (APCI)**:  $m/z$   $[\text{M}]^+$  calcd for  $\text{C}_{25}\text{H}_{19}\text{ClO}_2^+$ : 386.1068; found: 386.1047.

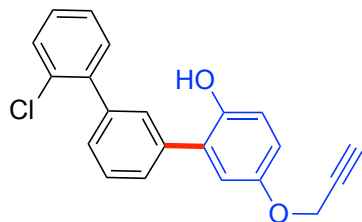

### 2''-chloro-5-(prop-2-yn-1-yloxy)-[1,1':3',1''-terphenyl]-2-ol **6k**

Following the **GP-C** using **2a-OTf** (50.5 mg, 0.15 mmol) and 4-(prop-2-yn-1-yloxy)phenol **5k** (33 mg, 0.23 mmol) in  $\text{CHCl}_3$  (1.5 mL, 0.1M) **6k** was obtained as colorless oil in 58% yield. (29 mg, 0.087 mmol). Regioselective ratio determined by  $^1\text{HNMR}$   $m:o = 88:12$ .

$^1\text{H NMR}$  (400 MHz,  $\text{CDCl}_3$ )  $\delta$  7.51 – 7.46 (m, 2H), 7.43 – 7.39 (m, 3H), 7.32 – 7.29 (m, 1H), 7.27 – 7.20 (m, 2H), 6.88 – 6.87 (m, 1H), 6.85 – 6.84 (m, 2H), 4.98 (brs, 1H), 4.59 (d,  $J = 2.4$  Hz, 2H), 2.43 (t,  $J = 2.4$  Hz, 1H).  $^{13}\text{C NMR}$  (101 MHz,  $\text{CDCl}_3$ )  $\delta$  151.6, 147.3, 140.3, 139.8, 136.7, 132.4, 131.3, 130.0 (2C), 129.1, 129.0, 128.8, 128.3, 128.2, 127.0, 116.8, 116.7, 116.1, 78.8, 75.4, 56.7. **HRMS (APCI)**:  $m/z$   $[\text{M}]^+$  calcd for  $\text{C}_{21}\text{H}_{15}\text{ClO}_2^+$ : 334.0755; found: 334.0741.

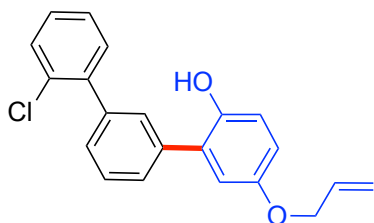

### 5-(allyloxy)-2''-chloro-[1,1':3',1''-terphenyl]-2-ol **6l**

Following the **GP-C** using **2a-OTf** (50.5 mg, 0.15 mmol) and 4-(prop-2-en-1-yloxy)phenol **5l** (33.8 mg, 0.22 mmol) in  $\text{CHCl}_3$  (1 mL, 0.15 M) for 32 hours, **6l** was obtained as pale yellow oil in 59% yield. (30 mg, 0.089 mmol). Regioselective ratio determined by  $^1\text{HNMR}$   $m:o = 89:11$ .

$^1\text{H NMR}$  (400 MHz,  $\text{CDCl}_3$ )  $\delta$  7.47 (t,  $J = 1.7$  Hz, 1H), 7.46 – 7.42 (m, 1H), 7.40 – 7.35 (m, 3H), 7.28 – 7.26 (m, 1H), 7.24 – 7.17 (m, 2H), 6.81 – 6.78 (m, 2H), 6.75 – 6.72 (m, 1H), 5.95 (ddt,  $J = 17.3, 10.6, 5.3$  Hz, 1H), 5.30 (dq,  $J = 17.3, 1.7$  Hz, 1H), 5.16 (dq,  $J = 10.5, 1.5$  Hz, 1H), 4.93 (brs, 1H), 4.40 (dt,  $J = 5.3, 1.5$  Hz, 2H).  $^{13}\text{C NMR}$  (101 MHz,  $\text{CDCl}_3$ )  $\delta$  152.6, 146.6, 140.2, 139.8, 136.9, 133.5, 132.4, 131.3, 130.1, 130.0, 129.0, 128.9, 128.8, 128.3, 128.2, 126.9, 117.6, 116.7, 116.4, 115.7, 69.6. **HRMS (APCI)**:  $m/z$   $[\text{M}]^+$  calcd for  $\text{C}_{21}\text{H}_{17}\text{ClO}_2^+$ : 336.0912; found: 336.0892.

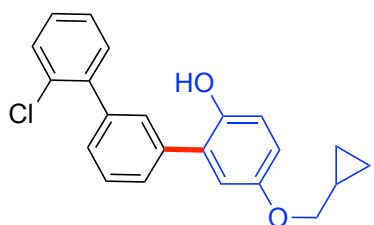

### 2''-chloro-5-(cyclopropylmethoxy)-[1,1':3',1''-terphenyl]-2-ol **6m**

Following the **GP-C** using **2a-OTf** (50.5 mg, 0.15 mmol) and 4-(cyclopropylmethoxy)phenol **5m** (37.0 mg, 0.22 mmol) in  $\text{CHCl}_3$  (1 mL, 0.15 M) for 32 hours **6m** was obtained as pale yellow oil in 55% yield. (29 mg, 0.083 mmol). Regioselective ratio determined by  $^1\text{HNMR}$   $m:o = 89:11$ .

$^1\text{H NMR}$  (400 MHz,  $\text{CDCl}_3$ )  $\delta$  7.51 – 7.50 (m, 1H), 7.50 – 7.46 (m, 1H), 7.44 – 7.38 (m, 3H), 7.32 – 7.30 (m, 1H), 7.28 – 7.20 (m, 2H), 6.85 – 6.75 (m, 3H), 4.97 (brs, 1H), 3.71 (d,  $J = 7.0$  Hz, 2H), 1.24 – 1.14 (m, 1H), 0.58 – 0.53 (m, 2H), 0.28 – 0.24 (m, 2H).  $^{13}\text{C NMR}$  (101 MHz,  $\text{CDCl}_3$ )  $\delta$  153.0, 146.5, 140.2, 139.8, 137.0, 132.4, 131.3, 130.1, 130.0, 129.0, 128.9, 128.8, 128.2, 128.2, 126.9, 116.7, 116.2, 115.7, 73.6, 10.4, 3.1 (2C). **HRMS (APCI)**:  $m/z$   $[\text{M}]^+$  calcd for  $\text{C}_{22}\text{H}_{19}\text{ClO}_2^+$ : 350.1068; found: 350.1053.

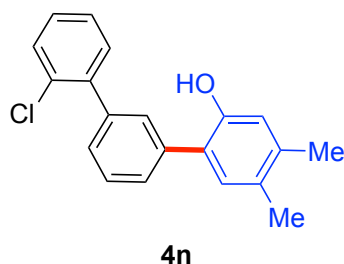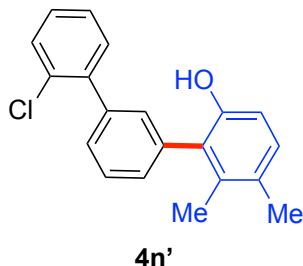

**2''-chloro-4,5-dimethyl-[1,1':3',1''-terphenyl]-2-ol 6n and 2''-chloro-5,6-dimethyl-[1,1':3',1''-terphenyl]-2-ol 6n'**

Following the **GP-C** using **2a-OTf** (50.5 mg, 0.15 mmol) and 3,4-dimethylphenol **5n** (27.5 mg, 0.23 mmol) in  $\text{CHCl}_3$  (1.5 mL, 0.1M) **6n** and **6n'** were obtained as colorless oil in 57% yield. ( $^1\text{H NMR}$  1:1.1 mixture, 26.5 mg, 0.086 mmol). Regioselective ratio determined by  $^1\text{H NMR}$   $m:o = 91:9$ .

$^1\text{H NMR}$  (500 MHz,  $\text{CDCl}_3$ )  $\delta$  7.60 – 7.56 (m, 2H), 7.54 (d,  $J = 7.5$  Hz, 1H), 7.50 – 7.48 (m, 4H), 7.45 (dt,  $J = 7.3, 1.5$  Hz, 1H), 7.41 – 7.38 (m, 3H), 7.35 – 7.28 (m, 5H), 7.10 – 7.07 (m, 2H), 6.81 – 6.79 (m, 2H), 5.23 (s, 1H), 4.74 (s, 1H), 2.28 (s, 3H), 2.27 (s, 3H), 2.24 (s, 3H), 2.04 (s, 3H).  $^{13}\text{C NMR}$  (126 MHz,  $\text{CDCl}_3$ )  $\delta$  150.9, 150.3, 140.4, 140.1, 140.0, 139.8, 137.8, 137.1, 135.7, 135.4, 132.4 (2C), 131.6, 131.3, 131.2, 131.1, 130.1, 130.0, 130.0, 129.9, 129.5, 129.1, 129.0, 128.9, 128.8, 128.7 (2C), 128.5, 128.5, 128.2, 127.9, 126.9 (2C), 125.0, 117.1, 112.1, 19.8, 19.6, 18.7, 17.3. **HRMS (APCI)**:  $m/z$   $[\text{M}]^+$  calcd for  $\text{C}_{20}\text{H}_{17}\text{ClO}^+$ : 308.0962; found: 308.0963.

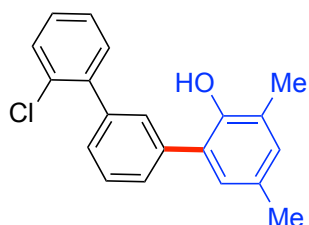

**2''-chloro-3,5-dimethyl-[1,1':3',1''-terphenyl]-2-ol 6o**

Following the **GP-C** using **2a-OTf** (33.7 mg, 0.1 mmol) and 2,4-dimethylphenol **5o** (18.3 mg, 0.15 mmol) in  $\text{CHCl}_3$  (1.5 mL, 0.1M) **6o** was obtained as colorless oil in 53% yield. (16.4 mg, 0.052 mmol). Regioselective ratio determined by  $^1\text{H NMR}$   $m:o = 91:9$ .

$^1\text{H NMR}$  (500 MHz,  $\text{CDCl}_3$ )  $\delta$  7.57 – 7.54 (m, 2H), 7.50 – 7.46 (m, 3H), 7.40 – 7.38 (m, 1H), 7.35 – 7.29 (m, 2H), 6.97 – 6.95 (m, 2H), 5.22 (brs, 1H), 2.29 (s, 3H), 2.29 (s, 3H).  $^{13}\text{C NMR}$  (126 MHz,  $\text{CDCl}_3$ )  $\delta$  148.4, 140.3, 139.9, 137.3, 132.5, 131.3, 131.3, 130.1, 130.0, 129.3, 129.1, 128.8, 128.7, 128.3, 128.1, 127.1, 126.9, 124.5, 20.4, 16.2. **HRMS (APCI)**:  $m/z$   $[\text{M}]^+$  calcd for  $\text{C}_{20}\text{H}_{17}\text{ClO}^+$ : 308.0962; found: 308.0956.

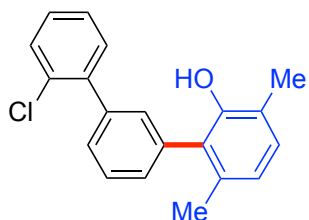

**2''-chloro-3,6-dimethyl-[1,1':3',1''-terphenyl]-2-ol 6p**

Following the **GP-C** using **2a-OTf** (50.5 mg, 0.15 mmol) and 2,5-dimethylphenol **5p** (21 mg, 0.22 mmol) in  $\text{CHCl}_3$  (1 mL, 0.15 M) **6p** was obtained as colorless oil in 76% yield. (35 mg, 0.114 mmol). Regioselective ratio determined by  $^1\text{H NMR}$   $m:o = 99:1$ .

$^1\text{H NMR}$  (400 MHz,  $\text{CDCl}_3$ )  $\delta$  7.53 (t,  $J = 7.6$  Hz, 1H), 7.46 – 7.42 (m, 2H), 7.37 – 7.36 (m, 1H), 7.34 (dd,  $J = 7.4, 2.0$  Hz, 1H), 7.30 – 7.22 (m, 3H), 7.00 (d,  $J = 7.6$  Hz, 1H), 6.73 (d,  $J = 7.6$  Hz, 1H), 4.85 (s, 1H), 2.22 (s, 3H), 2.06 (s, 3H).  $^{13}\text{C NMR}$  (101 MHz,  $\text{CDCl}_3$ )  $\delta$  150.9, 140.5, 139.8, 135.4, 134.4, 132.5, 131.5, 131.2, 130.0, 129.8, 129.5, 129.2, 129.1, 128.8, 127.2, 126.9, 121.5, 121.4, 20.3, 16.0. **HRMS (APCI)**:  $m/z$   $[\text{M}]^+$  calcd for  $\text{C}_{20}\text{H}_{17}\text{ClO}^+$ : 308.0962; found: 308.0954.



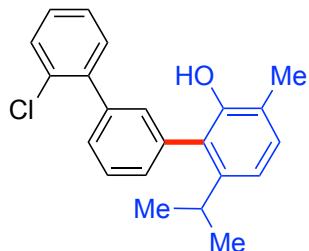

### 2''-chloro-6-isopropyl-3-methyl-[1,1':3',1''-terphenyl]-2-ol **6q**

Following the **GP-C** using **2a-OTf** (50.5 mg, 0.15 mmol) and isothymol **5q** (35 mg, 0.23 mmol) in  $\text{CHCl}_3$  (1.5 mL, 0.1M) **6q** was obtained as colorless oil in 59% yield. (30 mg, 0.089 mmol). Regioselective ratio determined by  $^1\text{H NMR}$   $m:o = 99:1$ .

$^1\text{H NMR}$  (400 MHz,  $\text{CDCl}_3$ )  $\delta$  7.53 (td,  $J = 7.6, 0.6$  Hz, 1H), 7.46 – 7.41 (m, 2H), 7.36 (td,  $J = 1.8, 0.6$  Hz, 1H), 7.35 – 7.32 (m, 1H), 7.30 – 7.22 (m, 3H), 7.09 (d,  $J = 7.9$  Hz, 1H), 6.83 (d,  $J = 7.9$  Hz, 1H), 4.72 (d,  $J = 0.6$  Hz, 1H), 2.70 (hept,  $J = 6.9$  Hz, 1H), 2.21 (s, 3H), 1.08 (d,  $J = 6.9$  Hz, 3H), 1.05 (d,  $J = 6.9$  Hz, 3H).  $^{13}\text{C NMR}$  (101 MHz,  $\text{CDCl}_3$ )  $\delta$  150.6, 145.5, 140.4, 139.8, 135.1, 132.5, 131.7, 131.2, 130.3, 130.1, 129.8, 129.2, 129.1, 128.8, 126.9, 126.3, 121.2, 116.7, 30.0, 24.1, 24.1, 15.9. **HRMS (APCI)**:  $m/z$   $[\text{M}]^+$  calcd for  $\text{C}_{22}\text{H}_{21}\text{ClO}^+$ : 336.1275; found: 336.1278.

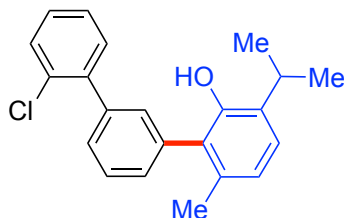

### 2''-chloro-3-isopropyl-6-methyl-[1,1':3',1''-terphenyl]-2-ol **6r**

Following the **GP-C** using **2a-OTf** (50.5 mg, 0.15 mmol) and thymol **5r** (33.8 mg, 0.22 mmol) in  $\text{CHCl}_3$  (1 mL, 0.15 M) **6r** was obtained as colorless oil in 75% yield. (38 mg, 0.108 mmol). Regioselective ratio determined by  $^1\text{H NMR}$   $m:o = 99:1$ .

$^1\text{H NMR}$  (400 MHz,  $\text{CDCl}_3$ )  $\delta$  7.52 (td,  $J = 7.6, 0.6$  Hz, 1H), 7.44 – 7.41 (m, 2H), 7.36 (td,  $J = 1.7, 0.5$  Hz, 1H), 7.33 – 7.31 (m, 1H), 7.28 – 7.20 (m, 3H), 7.07 (d,  $J = 7.9$  Hz, 1H), 6.78 (d,  $J = 7.8$  Hz, 1H), 4.84 (brs, 1H), 3.23 (hept,  $J = 6.9$  Hz, 1H), 2.04 (d,  $J = 0.7$  Hz, 3H), 1.21 (dd,  $J = 6.9, 3.7$  Hz, 6H).  $^{13}\text{C NMR}$  (101 MHz,  $\text{CDCl}_3$ )  $\delta$  149.9, 140.6, 139.8, 135.4, 134.2, 132.5, 132.0, 131.6, 131.2, 130.0, 129.6, 129.3, 129.1, 128.8, 127.4, 126.9, 125.3, 121.6, 27.1, 22.7, 22.6, 20.3. **HRMS (APCI)**:  $m/z$   $[\text{M}]^+$  calcd for  $\text{C}_{22}\text{H}_{21}\text{ClO}^+$ : 336.1275; found: 336.1263.

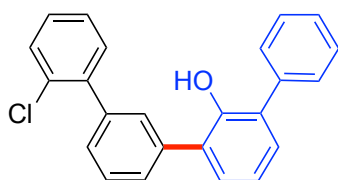

### 2'''-chloro-[1,1':3',1'':3'',1'''-quaterphenyl]-2'-ol **6t**

Following the **GP-C** using **2a-OTf** (50.5 mg, 0.15 mmol) and 2-phenylphenol **5t** (38.3 mg, 0.23 mmol) in  $\text{CHCl}_3$  (1 mL, 0.15 M) **6t** was obtained as pale-yellow oil in 52% yield. (28 mg, 0.078 mmol). Regioselective ratio determined by  $^1\text{H NMR}$   $m:o = 96:4$ .

$^1\text{H NMR}$  (400 MHz,  $\text{CDCl}_3$ )  $\delta$  7.86 (td,  $J = 1.8, 0.6$  Hz, 1H), 7.80 – 7.71 (m, 4H), 7.69 – 7.64 (m, 4H), 7.60 – 7.57 (m, 2H), 7.54 – 7.45 (m, 4H), 7.26 (t,  $J = 7.6$  Hz, 1H), 5.68 (brs, 1H).  $^{13}\text{C NMR}$  (101 MHz,  $\text{CDCl}_3$ )  $\delta$  149.4, 140.1, 139.8, 137.5, 137.3, 132.5, 131.4, 130.5, 130.0, 130.0, 129.3 (2C), 128.9 (2C), 128.8, 128.7, 128.6, 128.6, 128.6, 128.4, 127.7, 126.9, 120.7. **HRMS (APCI)**:  $m/z$   $[\text{M}]^+$  calcd for  $\text{C}_{24}\text{H}_{17}\text{ClO}^+$ : 356.0962; found: 356.0948.

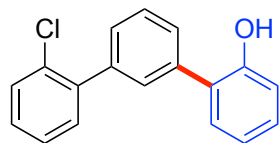

### 2''-chloro-[1,1':3',1''-terphenyl]-2-ol **6s**

Following the GP-C using **2a**-OTf (50.5 mg, 0.15 mmol) and phenol **5s** (21 mg, 0.23 mmol) in CHCl<sub>3</sub> (1 mL, 0.15 M) for 36 hours **6s** was obtained as single regioisomer as pale-yellow oil in 50% yield. (21 mg, 0.103 mmol). Regioselective ratio determined by <sup>1</sup>HNMR *m:o* = 92:8.

<sup>1</sup>H NMR (400 MHz, CDCl<sub>3</sub>) δ 7.86 – 7.85 (m, 1H), 7.84 – 7.81 (m, 1H), 7.78 – 7.74 (m, 3H), 7.67 – 7.65 (m, 1H), 7.62 – 7.52 (m, 4H), 7.30 – 7.26 (m, 2H), 5.61 (brs, 1H). <sup>13</sup>C NMR (101 MHz, CDCl<sub>3</sub>) δ 152.5, 140.3, 139.9, 136.8, 132.4, 131.3, 130.3, 130.1, 130.0, 129.3, 129.1, 128.8, 128.8, 128.3, 127.8, 126.9, 120.9, 115.9. HRMS (APCI): *m/z* [M]<sup>+</sup> calcd for C<sub>18</sub>H<sub>13</sub>ClO<sup>+</sup>: 280.0649; found: 280.0665.

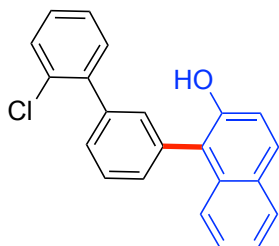

### 1-(2'-chloro-[1,1'-biphenyl]-3-yl)naphthalen-2-ol **6u**

Following the GP-C using **2a**-OTf (50.5 mg, 0.15 mmol) and 2-naphthol **5u** (32 mg, 0.23 mmol) in CHCl<sub>3</sub> (1.5 mL, 0.1M) **6u** was obtained as colorless oil in 67% yield. (33 mg, 0.1 mmol). Regioselective ratio determined by <sup>1</sup>HNMR *m:o* = 97:3.

<sup>1</sup>H NMR (500 MHz, CDCl<sub>3</sub>) δ 7.80 – 7.78 (m, 2H), 7.63 (t, *J* = 7.6 Hz, 1H), 7.56 (dt, *J* = 7.8, 1.5 Hz, 1H), 7.53 (t, *J* = 1.8 Hz, 1H), 7.51 – 7.49 (m, 1H), 7.47 – 7.45 (m, 1H), 7.43 (dt, *J* = 7.5, 1.5 Hz, 1H), 7.40 – 7.38 (m, 1H), 7.37 – 7.34 (m, 1H), 7.33 – 7.24 (m, 4H), 5.28 (s, 1H). <sup>13</sup>C NMR (126 MHz, CDCl<sub>3</sub>) δ 150.2, 140.7, 139.7, 133.9, 133.2, 132.5, 132.3, 131.3, 130.3, 130.1, 129.6, 129.4, 129.4, 128.9, 128.9, 128.0, 127.0, 126.6, 124.6, 123.3, 120.6, 117.4. HRMS (APCI): *m/z* [M]<sup>+</sup> calcd for C<sub>22</sub>H<sub>15</sub>ClO<sup>+</sup>: 330.0806; found: 330.0790.

## General procedure D: Metal free C-O arylation of phenols with cyclic diaryl $\lambda^3$ -chloranes **7a-I**

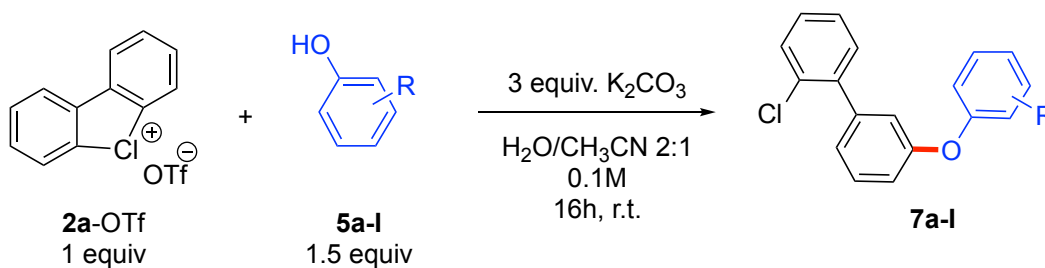

SCHEME S-8

To a dry and metal-free vial was charged **2a-OTf** (50.5 mg, 0.15 mmol, 1 equiv.) and  $\text{K}_2\text{CO}_3$  (62 mg, 0.45 mmol, 3 equiv). The vial was evacuated and back refilled with Argon three times. Subsequently, under argon, the desired phenol **5a-I** (1.5 equiv) was added followed by  $\text{H}_2\text{O/CH}_3\text{CN}$  (2:1, 1.5 mL, 0.1M). The resulting homogeneous mixture was stirred at room temperature for 16 hours. The conversion was verified by GCMS and TLC. The mixture was extracted with EtOAc (3 mL x 3 times). The extracts were combined, dried over  $\text{MgSO}_4$ , and filtered. After removal of volatile components, the crude was purified through Prep-TLC.

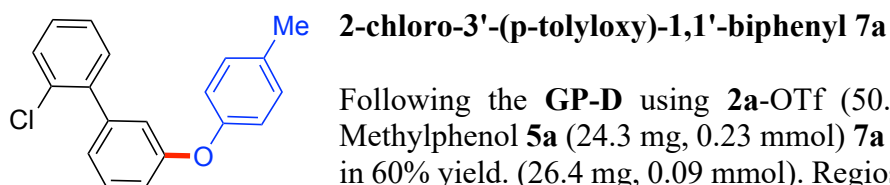

Following the **GP-D** using **2a-OTf** (50.5 mg, 0.15 mmol) and 4-Methylphenol **5a** (24.3 mg, 0.23 mmol) **7a** was obtained as colorless oil in 60% yield. (26.4 mg, 0.09 mmol). Regioselective ratio determined by  $^1\text{H NMR}$   $m:o = 93:7$ .

$^1\text{H NMR}$  (500 MHz,  $\text{CDCl}_3$ )  $\delta$  7.46 – 7.44 (m, 1H), 7.37 (t,  $J = 7.9$  Hz, 1H), 7.34 – 7.25 (m, 4H), 7.16 – 7.13 (m, 2H), 7.07 (dd,  $J = 2.5, 1.6$  Hz, 1H), 7.01 (ddd,  $J = 8.1, 2.4, 1.1$  Hz, 1H), 6.99 – 6.97 (m, 2H), 2.34 (s, 3H).  $^{13}\text{C NMR}$  (126 MHz,  $\text{CDCl}_3$ )  $\delta$  157.5, 154.5, 140.9, 139.9, 133.0, 132.4, 131.2, 130.3 (2C), 129.9, 129.3, 128.7, 126.8, 123.9, 119.3, 119.2 (2C), 117.4, 20.7. **HRMS** (APCI):  $m/z$   $[\text{M}]^+$  calcd for  $\text{C}_{19}\text{H}_{15}\text{ClO}^+$ : 294.0806; found: 294.0803.

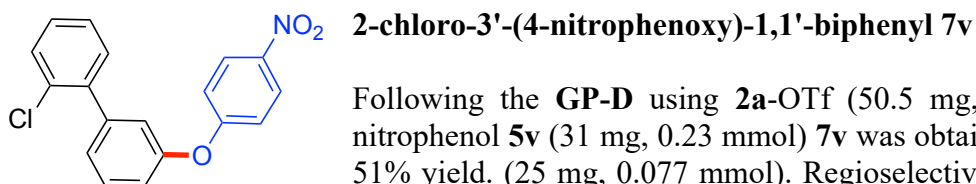

Following the **GP-D** using **2a-OTf** (50.5 mg, 0.15 mmol) and 4-nitrophenol **5v** (31 mg, 0.23 mmol) **7v** was obtained as colorless oil in 51% yield. (25 mg, 0.077 mmol). Regioselective ratio determined by  $^1\text{H NMR}$   $m:o = 94:6$ .

$^1\text{H NMR}$  (400 MHz,  $\text{CDCl}_3$ )  $\delta$  8.40 – 8.36 (m, 2H), 7.68 – 7.63 (m, 2H), 7.53 – 7.44 (m, 4H), 7.36 (t,  $J = 2.0$  Hz, 1H), 7.28 (ddd,  $J = 8.1, 2.4, 1.0$  Hz, 1H), 7.27 – 7.23 (m, 2H).  $^{13}\text{C NMR}$  (101 MHz,

CDCl<sub>3</sub>)  $\delta$  163.2, 154.3, 142.7, 141.6, 139.2, 132.3, 131.1, 130.1, 130.0, 129.1, 127.0, 126.4, 126.0 (2C), 121.6, 119.6, 117.2 (2C). **HRMS (APCI):**  $m/z$  [M]<sup>+</sup> calcd for C<sub>18</sub>H<sub>12</sub>ClNO<sub>3</sub><sup>+</sup>: 325.0500; found: 325.0521.

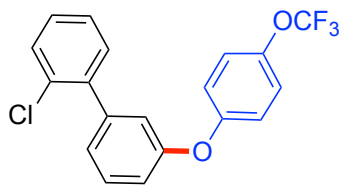

**2-chloro-3'-(4-(trifluoromethoxy)phenoxy)-1,1'-biphenyl 7w**

Following the **GP-D** using **2a-OTf** (50.5 mg, 0.15 mmol) and 4-trifluoromethoxy phenol **5w** (29  $\mu$ L, 0.23 mmol) **7w** was obtained as colorless oil in 80% yield. (44 mg, 0.12 mmol). Regioselective ratio determined by <sup>1</sup>HNMR  $m:o = 99:1$ .

<sup>1</sup>H NMR (400 MHz, CDCl<sub>3</sub>)  $\delta$  7.66 – 7.64 (m, 1H), 7.60 (t,  $J = 7.9$  Hz, 1H), 7.54 – 7.45 (m, 3H), 7.41 – 7.374 (m, 3H), 7.31 – 7.30 (m, 1H), 7.27 – 7.21 (m, 3H). <sup>13</sup>C NMR (101 MHz, CDCl<sub>3</sub>)  $\delta$  156.4, 155.7, 144.5 (q,  $J = 1.8$  Hz), 141.2, 139.6, 132.4, 131.2, 130.0, 129.6, 128.8, 126.9, 124.9, 122.6 (2C), 120.2, 120.6 (d,  $J = 243.9$  Hz), 119.6 (2C), 118.2. <sup>19</sup>F NMR (377 MHz, CDCl<sub>3</sub>)  $\delta$  -58.2. **HRMS (APCI):**  $m/z$  [M]<sup>+</sup> calcd for C<sub>19</sub>H<sub>12</sub>ClF<sub>3</sub>O<sub>2</sub><sup>+</sup>: 364.0472; found: 364.0491.

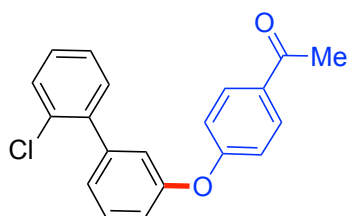

**1-(4-((2'-chloro-[1,1'-biphenyl]-3-yl)oxy)phenyl)ethan-1-one 7x**

Following the **GP-D** using **2a-OTf** (50.5 mg, 0.15 mmol) and 4'-hydroxyacetophenone **5x** (30.6 mg, 0.23 mmol) **7x** was obtained as colorless oil in 58% yield. (28.1 mg, 0.087 mmol). Regioselective ratio determined by <sup>1</sup>HNMR  $m:o = 96:4$ .

<sup>1</sup>H NMR (400 MHz, CDCl<sub>3</sub>)  $\delta$  7.89 – 7.85 (m, 2H), 7.39 – 7.35 (m, 2H), 7.27 – 7.17 (m, 5H), 7.09 – 7.08 (m, 1H), 7.012 – 6.97 (m, 2H), 2.49 (s, 3H). <sup>13</sup>C NMR (101 MHz, CDCl<sub>3</sub>)  $\delta$  196.7, 161.8, 155.1, 141.3, 139.4, 132.4, 132.0, 131.1, 130.6 (2C), 130.0, 129.7, 128.9, 126.9, 125.6, 121.2, 119.2, 117.4 (2C), 26.4. **HRMS (ESI):**  $m/z$  [M+H]<sup>+</sup> calcd for C<sub>20</sub>H<sub>16</sub>ClO<sub>2</sub><sup>+</sup>: 323.0833; found: 323.0834.

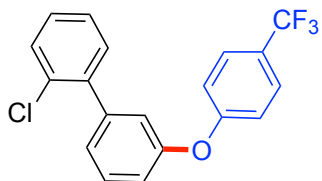

**2-chloro-3'-(4-(trifluoromethyl)phenoxy)-1,1'-biphenyl 7y**

Following the **GP-D** using **2a-OTf** (50.5 mg, 0.15 mmol) and 4-trifluoromethylphenol **5y** (36.5 mg, 0.23 mmol) **7y** was obtained as colorless oil in 67% yield. (35 mg, 0.1 mmol). (1 gram scale: 572 mg, 1.64 mmol, 55 %). Regioselective ratio determined by <sup>1</sup>HNMR  $m:o =$

95:5.

<sup>1</sup>H NMR (400 MHz, CDCl<sub>3</sub>)  $\delta$  7.51 – 7.49 (m, 2H), 7.39 – 7.35 (m, 2H), 7.27 -7.16 (m, 4H), 7.07 (t,  $J = 2.1$  Hz, 1H), 7.04 – 6.98 (m, 3H). <sup>13</sup>C NMR (101 MHz, CDCl<sub>3</sub>)  $\delta$  160.4, 160.3, 155.4, 141.4, 139.5, 132.4, 131.2, 130.0, 129.7, 128.9, 127.2 (q,  $J = 3.7$  Hz, 2C), 126.9, 126.4 – 120.2 (m, 1C),

125.5, 121.0, 119.0, 118.0 (2C).  $^{19}\text{F}$  NMR (377 MHz,  $\text{CDCl}_3$ )  $\delta$  -61.7. HRMS (APCI):  $m/z$   $[\text{M}]^+$  calcd for  $\text{C}_{19}\text{H}_{12}\text{ClF}_3\text{O}^+$ : 348.0523; found: 348.0528.

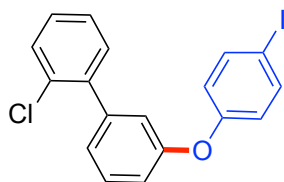

### 2-chloro-3'-(4-iodophenoxy)-1,1'-biphenyl **7z**

Following the **GP-D** using **2a**-OTf (50.5 mg, 0.15 mmol) and 4-iodophenol **5z** (49.5 mg, 0.23 mmol) **7z** was obtained as colorless oil in 62% yield. (37.7 mg, 0.093 mmol). (3 mmol scale reaction; 78%, 944 mg, 2.32 mmol). Regioselective ratio determined by  $^1\text{H}$ NMR  $m:o = 93:7$ .

$^1\text{H}$  NMR (500 MHz,  $\text{CDCl}_3$ )  $\delta$  7.65 – 7.62 (m, 2H), 7.48 – 7.46 (m, 1H), 7.41 (t,  $J = 7.9$  Hz, 1H), 7.35 – 7.27 (m, 3H), 7.22 – 7.20 (m, 1H), 7.11 (dd,  $J = 2.4, 1.5$  Hz, 1H), 7.04 (ddd,  $J = 8.1, 2.5, 1.1$  Hz, 1H), 6.86 – 6.83 (m, 2H).  $^{13}\text{C}$  NMR (126 MHz,  $\text{CDCl}_3$ )  $\delta$  157.2, 156.2, 141.2, 139.6, 138.7 (2C), 132.4, 131.2, 130.0, 129.5, 128.8, 126.9, 124.8, 120.9 (2C), 120.1, 118.2, 86.1. HRMS (APCI):  $m/z$   $[\text{M}]^+$  calcd for  $\text{C}_{18}\text{H}_{12}\text{ClIO}^+$ : 405.9616; found: 405.9617.

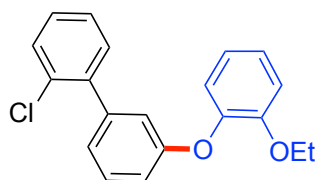

### 2-chloro-3'-(2-ethoxyphenoxy)-1,1'-biphenyl **7A**

Following the **GP-D** using **2a**-OTf (50.5 mg, 0.15 mmol) and 2-ethoxyphenol **5A** (28.5  $\mu\text{L}$ , 0.23 mmol) **7A** was obtained as colorless oil in 41% yield. (20.1 mg, 0.062 mmol). Regioselective ratio determined by  $^1\text{H}$ NMR  $m:o = 91:9$ .

$^1\text{H}$  NMR (400 MHz,  $\text{CDCl}_3$ )  $\delta$  7.45 – 7.43 (m, 1H), 7.34 (t,  $J = 7.8$  Hz, 1H), 7.33 – 7.25 (m, 3H), 7.13 – 7.07 (m, 3H), 7.02 – 6.97 (m, 3H), 6.93 (ddd,  $J = 7.9, 7.3, 1.5$  Hz, 1H), 4.06 (q,  $J = 7.0$  Hz, 2H), 1.30 (t,  $J = 7.0$  Hz, 3H).  $^{13}\text{C}$  NMR (101 MHz,  $\text{CDCl}_3$ )  $\delta$  158.0, 150.8, 145.2, 140.6, 140.1, 132.4, 131.2, 129.9, 129.0, 128.6, 126.7, 124.9, 123.4, 121.6, 121.2, 118.1, 116.3, 114.5, 64.5, 14.7. HRMS (APCI):  $m/z$   $[\text{M}]^+$  calcd for  $\text{C}_{20}\text{H}_{17}\text{ClO}_2^+$ : 324.0912; found: 324.0932.

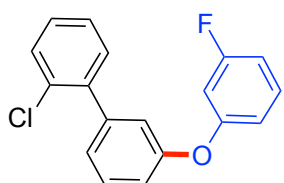

### 2-chloro-3'-(3-fluorophenoxy)-1,1'-biphenyl **7B**

Following the **GP-D** using **2a**-OTf (50.5 mg, 0.15 mmol) and 3-fluorophenol **5B** (20.3  $\mu\text{L}$ , 0.23 mmol) **7B** was obtained as colorless oil in 48% yield. (21.6 mg, 0.072 mmol). Regioselective ratio determined by  $^1\text{H}$ NMR  $m:o = 95:5$ .

$^1\text{H}$  NMR (500 MHz,  $\text{CDCl}_3$ )  $\delta$  7.31 – 7.29 (m, 1H), 7.28 – 7.24 (m, 1H), 7.19 – 7.09 (m, 4H), 7.06 (ddd,  $J = 7.6, 1.7, 1.1$  Hz, 1H), 6.98 (dd,  $J = 2.6, 1.5$  Hz, 1H), 6.90 (ddd,  $J = 8.2, 2.4, 1.1$  Hz, 1H), 6.69 (m, 1H), 6.65 – 6.59 (m, 2H).  $^{13}\text{C}$  NMR (126 MHz,  $\text{CDCl}_3$ )  $\delta$  163.5 (d,  $J = 246.6$  Hz), 155.9, 158.7 (d,  $J = 10.4$  Hz), 141.2, 139.6, 132.4, 131.2, 130.5 (d,  $J = 10.0$  Hz), 130.0, 129.5, 128.8, 126.9, 125.1, 120.5, 118.5, 114.1 (d,  $J = 3.2$  Hz), 110.0 (d,  $J = 21.3$  Hz), 106.2 (d,  $J = 24.5$  Hz).  $^{19}\text{F}$  NMR (377 MHz,  $\text{CDCl}_3$ )  $\delta$  -110.9. HRMS (APCI):  $m/z$   $[\text{M}]^+$  calcd for  $\text{C}_{18}\text{H}_{12}\text{ClFO}^+$ : 298.0555; found: 298.0545.

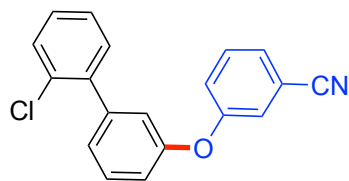

### 3-((2'-chloro-[1,1'-biphenyl]-3-yl)oxy)benzonitrile **7C**

Following the **GP-D** using **2a-OTf** (50.5 mg, 0.15 mmol) and 3-cyanophenol **5C** (27 mg, 0.23 mmol) **7C** was obtained as colorless oil in 65% yield. (30 mg, 0.098 mmol). Regioselective ratio determined by  $^1\text{H NMR}$   $m:o = 90:10$ .

$^1\text{H NMR}$  (400 MHz,  $\text{CDCl}_3$ )  $\delta$  7.44 – 7.38 (m, 3H), 7.35 – 7.25 (m, 5H), 7.25 – 7.22 (m, 2H), 7.11 – 7.10 (m, 1H), 7.06 – 7.01 (m, 1H).  $^{13}\text{C NMR}$  (101 MHz,  $\text{CDCl}_3$ )  $\delta$  157.9, 155.2, 141.5, 139.3, 132.3, 131.1, 130.7, 130.0, 129.8, 129.0, 126.9, 126.5, 125.7, 122.9, 121.3, 120.8, 118.8, 118.2, 113.6. **HRMS (APCI)**:  $m/z$   $[\text{M}]^+$  calcd for  $\text{C}_{19}\text{H}_{12}\text{ClNO}^+$ : 305.0602; found: 305.0607.

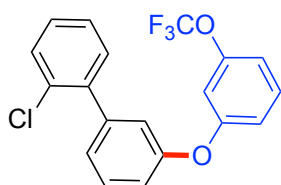

### 2-chloro-3'-(3-(trifluoromethoxy)phenoxy)-1,1'-biphenyl **7D**

Following the **GP-D** using **2a-OTf** (50.5 mg, 0.15 mmol) and 3-(trifluoromethoxy)phenol **5D** (29  $\mu\text{L}$ , 0.23 mmol) **7D** was obtained as colorless oil in 52% yield. (28.2 mg, 0.077 mmol). Regioselective ratio determined by  $^1\text{H NMR}$   $m:o = 91:9$ .

$^1\text{H NMR}$  (400 MHz,  $\text{CDCl}_3$ )  $\delta$  7.39 – 7.33 (m, 2H), 7.27 – 7.20 (m, 4H), 7.15 (dt,  $J = 7.7, 1.3$  Hz, 1H), 7.06 – 7.05 (m, 1H), 7.00 – 6.97 (m, 1H), 6.91 – 6.84 (m, 3H).  $^{13}\text{C NMR}$  (101 MHz,  $\text{CDCl}_3$ )  $\delta$  158.5, 155.8, 150.2 (q,  $J = 1.8$  Hz), 141.3, 139.6, 132.4, 131.2, 130.5, 130.0, 129.7, 128.9, 126.9, 125.3, 120.6, 120.4 (q,  $J = 257.5$  Hz), 118.6, 116.6, 115.2, 111.5.  $^{19}\text{F NMR}$  (377 MHz,  $\text{CDCl}_3$ )  $\delta$  -57.8. **HRMS (APCI)**:  $m/z$   $[\text{M}]^+$  calcd for  $\text{C}_{19}\text{H}_{12}\text{ClF}_3\text{O}_2^+$ : 364.0472; found: 364.0465.

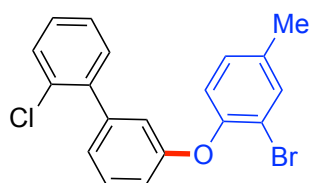

### 3'-(2-bromo-4-methylphenoxy)-2-chloro-1,1'-biphenyl **7E**

Following the **GP-D** using **2a-OTf** (50.5 mg, 0.15 mmol) and 2-bromo-4-methylphenol **5E** (27  $\mu\text{L}$ , 0.23 mmol) **7E** was obtained as colorless oil in 73% yield. (41 mg, 0.11 mmol). Regioselective ratio determined by  $^1\text{H NMR}$   $m:o = 91:9$ .

$^1\text{H NMR}$  (400 MHz,  $\text{CDCl}_3$ )  $\delta$  7.74 – 7.72 (m, 2H), 7.68 – 7.64 (m, 1H), 7.63 – 7.59 (m, 1H), 7.58 – 7.52 (m, 2H), 7.44 (ddd,  $J = 7.7, 1.7, 1.0$  Hz, 1H), 7.36 (ddd,  $J = 8.3, 2.2, 0.9$  Hz, 1H), 7.30 – 7.29 (m, 1H), 7.28 – 7.24 (m, 2H), 2.61 (s, 3H).  $^{13}\text{C NMR}$  (101 MHz,  $\text{CDCl}_3$ )  $\delta$  157.0, 150.9, 140.9, 139.8, 135.3, 134.1, 132.4, 131.2, 129.9, 129.3, 129.3, 128.7, 126.8, 124.1, 121.0, 118.6, 116.7, 114.9, 20.4. **HRMS (APCI)**:  $m/z$   $[\text{M}]^+$  calcd for  $\text{C}_{19}\text{H}_{14}\text{BrClO}^+$ : 371.9911; found: 371.9919.

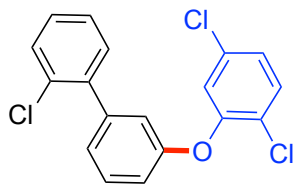

### 2-chloro-3'-(2,5-dichlorophenoxy)-1,1'-biphenyl **7F**

Following the **GP-D** using **2a-OTf** (50.5 mg, 0.15 mmol) and 2,5-dichlorophenol **5F** (36.7 mg, 0.23 mmol) **7F** was obtained as colorless oil in 65% yield. (34 mg, 0.097 mmol). Regioselective ratio determined by  $^1\text{H NMR}$   $m:o = 94:6$ .

$^1\text{H NMR}$  (500 MHz,  $\text{CDCl}_3$ )  $\delta$  7.70 – 7.68 (m, 1H), 7.66 (t,  $J = 7.9$  Hz, 1H), 7.61 – 7.60 (m, 1H), 7.58 – 7.55 (m, 1H), 7.54 – 7.49 (m, 2H), 7.46 (ddd,  $J = 7.6, 1.7, 1.1$  Hz, 1H), 7.32 (dd,  $J = 2.6, 1.5$  Hz, 1H), 7.29 – 7.25 (m, 3H).  $^{13}\text{C NMR}$  (126 MHz,  $\text{CDCl}_3$ )  $\delta$  155.7, 153.2, 141.3, 139.5, 133.1, 132.4, 131.3, 131.2, 130.0, 129.7, 128.9, 126.9, 125.2, 124.5, 123.8, 120.3, 119.7, 117.7. **HRMS** (APCI):  $m/z$   $[\text{M}]^+$  calcd for  $\text{C}_{18}\text{H}_{11}\text{Cl}_3\text{O}^+$ : 347.9870; found: 347.9846.

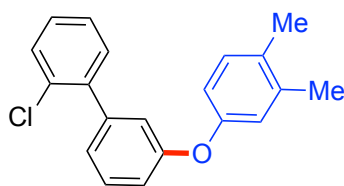

### 2-chloro-3'-(3,4-dimethylphenoxy)-1,1'-biphenyl **7G**

Following the **GP-D** using **2a-OTf** (50.5 mg, 0.15 mmol) and 3,4-dimethylphenol **5G** (27.5 mg, 0.23 mmol) **7G** was obtained as colorless oil in 57% yield. (26.2 mg, 0.085 mmol). Regioselective ratio determined by  $^1\text{H NMR}$   $m:o = 95:5$ .

$^1\text{H NMR}$  (500 MHz,  $\text{CDCl}_3$ )  $\delta$  7.35 – 7.33 (m, 1H), 7.26 (t,  $J = 7.9$  Hz, 1H), 7.23 – 7.14 (m, 3H), 7.03 (ddd,  $J = 7.5, 1.7, 1.0$  Hz, 1H), 6.99 (d,  $J = 8.1$  Hz, 1H), 6.97 (dd,  $J = 2.6, 1.5$  Hz, 1H), 6.90 (ddd,  $J = 8.2, 2.5, 1.1$  Hz, 1H), 6.78 (d,  $J = 2.7$  Hz, 1H), 6.71 (dd,  $J = 8.2, 2.7$  Hz, 1H), 2.13 (s, 6H).  $^{13}\text{C NMR}$  (126 MHz,  $\text{CDCl}_3$ )  $\delta$  157.5, 154.6, 140.9, 140.0, 138.2, 132.4, 131.7, 131.2, 130.6, 129.9, 129.2, 128.6, 126.8, 123.7, 120.6, 119.3, 117.4, 116.5, 19.9, 19.0. **HRMS** (APCI):  $m/z$   $[\text{M}]^+$  calcd for  $\text{C}_{20}\text{H}_{17}\text{ClO}^+$ : 308.0962; found: 308.0940.

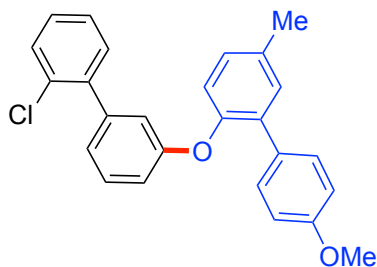

### 2-((2'-chloro-[1,1'-biphenyl]-3-yl)oxy)-4'-methoxy-5-methyl-1,1'-biphenyl **7H**

Following the **GP-D** using **2a-OTf** (50.5 mg, 0.15 mmol) and 4'-methoxy-5-methyl-[1,1'-biphenyl]-2-ol **5H** (48 mg, 0.23 mmol) **7H** was obtained as colorless oil in 42% yield. (25.2 mg, 0.063 mmol). Regioselective ratio determined by  $^1\text{H NMR}$   $m:o = 92:8$ .

$^1\text{H NMR}$  (500 MHz,  $\text{CDCl}_3$ )  $\delta$  7.48 – 7.45 (m, 2H), 7.43 – 7.41 (m, 1H), 7.30 – 7.23 (m, 5H), 7.09 – 7.07 (m, 1H), 7.04 (ddd,  $J = 7.6, 1.6, 1.1$  Hz, 1H), 6.98 (d,  $J = 8.2$  Hz, 1H), 6.96 (dd,  $J = 2.6, 1.5$  Hz, 1H), 6.91 (ddd,  $J = 8.2, 2.4, 1.1$  Hz, 1H), 6.90 – 6.87 (m, 2H), 3.79 (s, 3H), 2.37 (s, 3H).  $^{13}\text{C NMR}$  (126 MHz,  $\text{CDCl}_3$ )  $\delta$  158.8, 157.9, 150.8, 140.7, 140.0, 133.8, 133.3, 132.4, 131.6, 131.2, 130.2 (2C), 130.2, 129.9, 129.1, 128.8, 128.6, 126.7, 123.3, 120.7, 118.6, 116.8, 113.6 (2C), 55.2, 20.8. **HRMS** (APCI):  $m/z$   $[\text{M}]^+$  calcd for  $\text{C}_{26}\text{H}_{21}\text{ClO}_2^+$ : 400.1225; found: 400.1232.

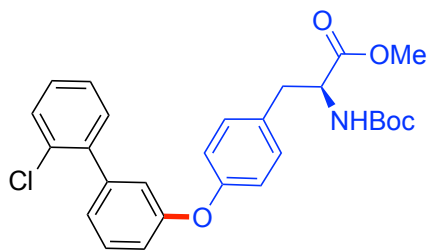

**methyl (S)-2-((tert-butoxycarbonyl)amino)-3-(4-((2'-chloro-[1,1'-biphenyl]-3-yl)oxy)phenyl)propanoate 7I**

Following the **GP-D** using **2a-OTf** (50.5 mg, 0.15 mmol) and Boc-L-tyrosine methyl ester **5I** (66 mg, 0.23 mmol) **7I** was obtained as colorless oil in 62% yield. (45 mg, 0.093 mmol). Regioselective ratio determined by  $^1\text{H NMR}$   $m:o = 95:5$ .

$^1\text{H NMR}$  (400 MHz,  $\text{CDCl}_3$ )  $\delta$  7.49 – 7.46 (m, 1H), 7.41 (t,  $J = 7.9$  Hz, 1H), 7.37 – 7.27 (m, 3H), 7.20 (dt,  $J = 7.6, 1.2$  Hz, 1H), 7.14 – 7.12 (m, 3H), 7.06 – 7.01 (m, 3H), 5.04 (d,  $J = 7.8$  Hz, 1H), 4.63 – 4.58 (m, 1H), 3.73 (s, 3H), 3.15 – 3.02 (m, 2H), 1.44 (s, 9H).  $^{13}\text{C NMR}$  (101 MHz,  $\text{CDCl}_3$ )  $\delta$  172.3, 156.8, 156.1, 155.0, 141.0, 139.8, 132.4, 131.2, 130.9, 130.6 (2C), 129.9, 129.3, 128.7, 126.8, 124.3, 120.0, 118.9 (2C), 118.0, 79.9, 54.4, 52.2, 37.7, 28.3 (3C). **HRMS (ESI)**:  $m/z$   $[\text{M}+\text{K}]^+$  calcd for  $\text{C}_{27}\text{H}_{28}\text{ClKNO}_5^+$ : 520.1288; found: 520.1265.

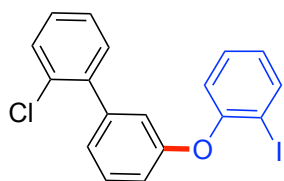

**2-chloro-3'-(2-iodophenoxy)-1,1'-biphenyl 7J**

Following the **GP-D** using **2a-OTf** (168 mg, 0.5 mmol), 2-iodophenol **5J** (165 mg, 0.75 mmol),  $\text{K}_2\text{CO}_3$  (207 mg, 1.5 mmol) in  $\text{H}_2\text{O}:\text{CH}_3\text{CN}$  (2:1, 0.1 M) **7J** was obtained as colorless oil in 68% yield through flash chromatography (138 mg, 0.34 mmol). Regioselective ratio determined by

$^1\text{H NMR}$   $m:o = 89:11$ .

$^1\text{H NMR}$  (400 MHz,  $\text{CDCl}_3$ )  $\delta$  7.79 (dd,  $J = 7.9, 1.6$  Hz, 1H), 7.39 – 7.37 (m, 1H), 7.33 (t,  $J = 7.9$  Hz, 1H), 7.28 – 7.20 (m, 4H), 7.12 (ddd,  $J = 7.7, 1.7, 1.0$  Hz, 1H), 6.98 – 6.97 (m, 1H), 6.94 (ddd,  $J = 8.1, 2.4, 1.0$  Hz, 1H), 6.91 (dd,  $J = 8.2, 1.5$  Hz, 1H), 6.80 (td,  $J = 7.6, 1.5$  Hz, 1H).  $^{13}\text{C NMR}$  (101 MHz,  $\text{CDCl}_3$ )  $\delta$  156.5, 156.4, 141.1, 139.9, 139.7, 132.4, 131.2, 130.0, 129.7, 129.4, 128.8, 126.8, 125.4, 124.6, 119.5, 119.5, 117.6, 88.9. **HRMS (APCI)**:  $m/z$   $[\text{M}]^+$  calcd for  $\text{C}_{18}\text{H}_{12}\text{ClIO}^+$ : 405.9616; found: 405.9605.



## General procedure E: Metal free C-O arylation of phenols with cyclic diaryl $\lambda^3$ -bromanes **9a-E**

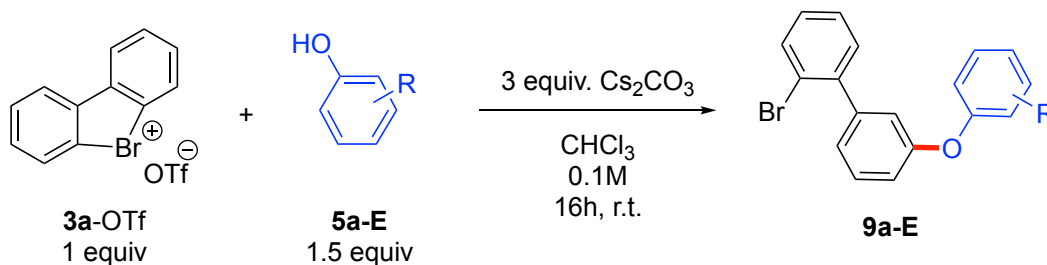

SCHEME S-9

To a dry and metal-free vial was charged **3a-OTf** (57 mg, 0.15 mmol, 1 equiv.) and  $\text{Cs}_2\text{CO}_3$  (146 mg, 0.45 mmol, 3 equiv). The vial was evacuated and back refilled with Argon three times. Subsequently, under argon, the desired phenol **3a-E** (1.5 equiv) was added followed by  $\text{CHCl}_3$  (1.5 mL, 0.1M). The resulting heterogenous mixture was stirred at room temperature for 16 hours. The conversion was verified by GCMS and TLC. The mixture was diluted with EtOAc (3 mL) and filtered. After removal of volatile components, the crude was purified through Prep-TLC.

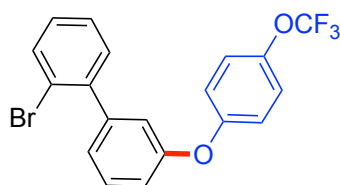

### 2-bromo-3'-(4-(trifluoromethoxy)phenoxy)-1,1'-biphenyl **9w**

Following the **GP-E** using **3a-OTf** (57 mg, 0.15 mmol) and 4-trifluoromethoxy phenol **5w** (29  $\mu\text{L}$ , 0.23 mmol) **9w** was obtained as colorless oil in 99% yield. (61 mg, 0.15 mmol). Regioselective ratio determined by  $^1\text{H NMR}$   $m:o = 92:8$ .

$^1\text{H NMR}$  (400 MHz,  $\text{CDCl}_3$ )  $\delta$  7.84 (dd,  $J = 7.9, 1.2$  Hz, 1H), 7.60 (t,  $J = 7.9$  Hz, 1H), 7.55 – 7.49 (m, 2H), 7.41 – 7.33 (m, 4H), 7.27 – 7.21 (m, 4H).  $^{13}\text{C NMR}$  (101 MHz,  $\text{CDCl}_3$ )  $\delta$  156.3, 155.7, 144.5 (q,  $J = 2.0$  Hz), 142.9, 141.7, 133.2, 131.1, 129.5, 129.0, 127.4, 124.8, 122.6 (2C), 122.5, 120.2, 120.5 (q,  $J = 256.6$  Hz), 119.6 (2C), 118.2.  $^{19}\text{F NMR}$  (377 MHz,  $\text{CDCl}_3$ )  $\delta$  -58.2. **HRMS (APCI)**:  $m/z$  [ $\text{M}$ ] $^+$  calcd for  $\text{C}_{19}\text{H}_{12}\text{BrF}_3\text{O}_2^+$ : 407.9967; found: 407.9943.

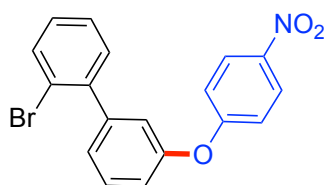

### 2-bromo-3'-(4-nitrophenoxy)-1,1'-biphenyl **9v**

Following the **GP-E** using **3a-OTf** (57 mg, 0.15 mmol) and 4-nitrophenol **5v** (31 mg, 0.23 mmol) **9v** was obtained as colorless oil in 79% yield. (44 mg, 0.12 mmol). Regioselective ratio determined by  $^1\text{H NMR}$   $m:o = 99:1$ .

$^1\text{H NMR}$  (400 MHz,  $\text{CDCl}_3$ )  $\delta$  8.40 – 8.36 (m, 2H), 7.83 (dd,  $J = 8.0, 1.2$  Hz, 1H), 7.65 (t,  $J = 7.9$  Hz, 1H), 7.54 (dd,  $J = 7.6, 1.2$  Hz, 1H), 7.51 (m, 7.48 (m, 1H), 7.44 (ddd,  $J = 7.7, 1.6, 1.0$  Hz, 1H), 7.38 (ddd,  $J = 8.0, 6.9, 2.2$  Hz, 1H), 7.32 – 7.31 (m, 1H), 7.28 (ddd,  $J = 8.1, 2.4, 1.0$  Hz, 1H), 7.26 – 7.23 (m, 2H).  $^{13}\text{C NMR}$  (101 MHz,  $\text{CDCl}_3$ )  $\delta$  163.2, 154.2, 143.3, 142.7, 141.2, 133.2, 131.0,

130.0, 129.2, 127.5, 126.3, 126.0 (2C), 122.4, 121.6, 119.6, 117.3 (2C). **HRMS (APCI):**  $m/z$   $[M]^+$  calcd for  $C_{18}H_{12}BrNO_3^+$ : 368.9995; found: 368.9990.

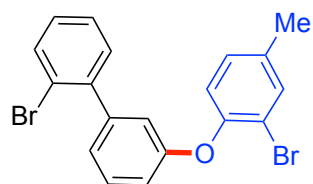

**2-bromo-3'-(2-bromo-4-methylphenoxy)-1,1'-biphenyl 9E**

Following the **GP-E** using **2z-OTf** (57 mg, 0.15 mmol) and 2-bromo-4-methylphenol **5E** (27  $\mu$ L, 0.23 mmol) **9E** was obtained as colorless oil in 85% yield. (53 mg, 0.13 mmol). Regioselective ratio determined by  $^1\text{H NMR}$   $m:o = 94:6$ .

$^1\text{H NMR}$  (400 MHz,  $\text{CDCl}_3$ )  $\delta$  7.66 – 7.64 (m, 1H), 7.46 (dd,  $J = 2.1, 0.8$  Hz, 1H), 7.41 – 7.37 (m, 1H), 7.35 – 7.32 (m, 2H), 7.20 (ddd,  $J = 8.1, 6.3, 2.9$  Hz, 1H), 7.13 (ddd,  $J = 7.6, 1.6, 1.0$  Hz, 1H), 7.09 (ddd,  $J = 8.3, 2.1, 0.7$  Hz, 1H), 7.02 – 6.97 (m, 3H), 2.34 (s, 3H).  $^{13}\text{C NMR}$  (101 MHz,  $\text{CDCl}_3$ )  $\delta$  156.9, 150.9, 142.6, 141.8, 135.3, 134.1, 133.1, 131.1, 129.3, 129.3, 128.9, 127.3, 124.0, 122.5, 121.1, 118.5, 116.8, 114.9, 20.4. **HRMS (APCI):**  $m/z$   $[M]^+$  calcd for  $C_{19}H_{14}Br_2O^+$ : 415.9406; found: 415.9383.

## Unsymmetric Substrates

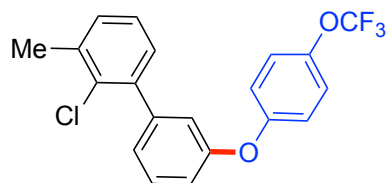

### 2-chloro-3-methyl-3'-(4-(trifluoromethoxy)phenoxy)-1,1'-biphenyl **7dw**

Following the **GP-D** using **2d** (52.6 mg, 0.15 mmol) and 4-trifluoromethoxy phenol **5w** (29  $\mu$ L, 0.23 mmol) **7dw** was obtained as colorless oil in 74% yield. (42 mg, 0.11 mmol).

**$^1\text{H}$  NMR** (400 MHz,  $\text{CDCl}_3$ )  $\delta$  7.33 – 6.93 (m, 11H), 2.35 (s, 3H).  **$^{13}\text{C}$  NMR** (101 MHz,  $\text{CDCl}_3$ )  $\delta$  156.3, 155.8, 144.5 (d,  $J = 2.2$  Hz), 142.0, 140.1, 137.1, 132.6 (brs), 130.2, 129.5, 128.7, 126.2, 124.9, 120.5 (q,  $J = 256.8$  Hz), 122.6 (2C), 120.3, 119.6 (2C), 118.0, 21.0.  **$^{19}\text{F}$  NMR** (377 MHz,  $\text{CDCl}_3$ )  $\delta$  -58.2. **HRMS (APCI)**:  $m/z$   $[\text{M}]^+$  calcd for  $\text{C}_{20}\text{H}_{14}\text{ClF}_3\text{O}_2^+$ : 378.0629; found: 378.0637.

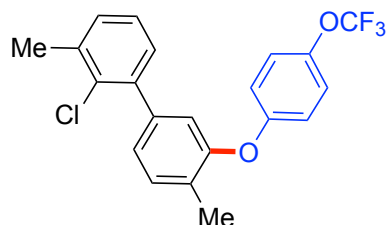

### 2-chloro-3,4'-dimethyl-3'-(4-(trifluoromethoxy)phenoxy)-1,1'-biphenyl **7ww**

Following the **GP-D** using **2w** (55 mg, 0.15 mmol) and 4-trifluoromethoxy phenol **5w** (29  $\mu$ L, 0.23 mmol) **7ww** was obtained as unique regioisomer as colorless oil in 71% yield. (42 mg, 0.11 mmol).

**$^1\text{H}$  NMR** (500 MHz,  $\text{CDCl}_3$ )  $\delta$  7.60 (dd,  $J = 7.7, 0.8$  Hz, 1H), 7.51 – 7.49 (m, 1H), 7.46 – 7.41 (m, 5H), 7.30 (d,  $J = 1.7$  Hz, 1H), 7.27 – 7.23 (m, 2H), 2.71 (s, 3H), 2.57 (s, 3H).  **$^{13}\text{C}$  NMR** (101 MHz,  $\text{CDCl}_3$ )  $\delta$  156.3, 153.5, 143.9 (q,  $J = 2.2$  Hz), 140.0, 139.4, 137.0, 132.7, 131.2, 130.0, 129.1, 128.7, 126.2, 125.5, 122.6 (2C), 121.0, 120.5 (d,  $J = 256.4$  Hz), 118.1 (2C), 21.0, 15.9.  **$^{19}\text{F}$  NMR** (377 MHz,  $\text{CDCl}_3$ )  $\delta$  -58.3. **HRMS (APCI)**:  $m/z$   $[\text{M}]^+$  calcd for  $\text{C}_{21}\text{H}_{16}\text{ClF}_3\text{O}_2^+$ : 392.0785; found: 392.0781.

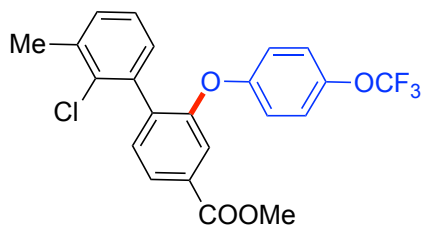

**7zw**

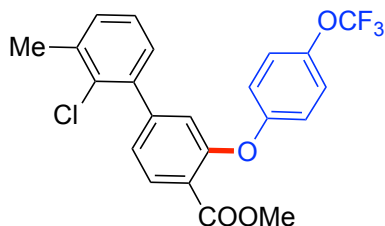

**7zw'**

**methyl 2'-chloro-3'-methyl-2-(4-(trifluoromethoxy)phenoxy)-[1,1'-biphenyl]-4-carboxylate 7zw and methyl 2'-chloro-3'-methyl-3-(4-(trifluoromethoxy)phenoxy)-[1,1'-biphenyl]-4-carboxylate 7zw'**

Following the **GP-D** using **2z** (61 mg, 0.15 mmol) and 4-trifluoromethoxy phenol **5w** (29  $\mu$ L, 0.23 mmol) **7zw** and **7zw'** were obtained in 78% total yield. Compounds separated by prep-TLC (Cy:EtOAc 9:1)

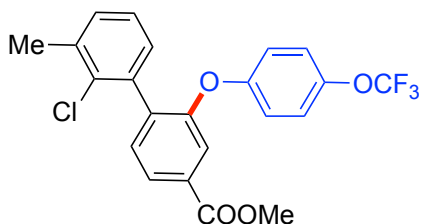

**7zw** - Colorless oil, 53% (35 mg, 0.08 mmol)

**<sup>1</sup>H NMR** (500 MHz, CDCl<sub>3</sub>)  $\delta$  7.74 (dd,  $J = 7.9, 1.7$  Hz, 1H), 7.51 (d,  $J = 1.7$  Hz, 1H), 7.25 (d,  $J = 7.9$  Hz, 1H), 7.07 (ddd,  $J = 7.5, 1.8, 0.8$  Hz, 1H), 7.01 (t,  $J = 7.6$  Hz, 1H), 6.97 – 6.94 (m, 3H), 6.79 (m, 2H), 3.76 (s, 3H), 2.25 (s, 3H). **<sup>13</sup>C NMR** (101 MHz, CDCl<sub>3</sub>)  $\delta$  166.2, 155.2, 154.3, 144.6 (d,  $J = 1.8$  Hz), 136.7, 136.5, 136.0, 133.4, 132.0, 131.3, 130.6, 128.7, 126.0, 124.6, 122.4 (2C), 120.4 (q,  $J = 256.8$  Hz), 119.8 (2C), 119.7, 52.3, 20.7. **<sup>19</sup>F NMR** (377 MHz, CDCl<sub>3</sub>)  $\delta$  -58.3. **HRMS (APCI):**  $m/z$  [M]<sup>+</sup> calcd for C<sub>22</sub>H<sub>16</sub>ClF<sub>3</sub>O<sub>4</sub><sup>+</sup>: 436.0684; found: 436.0691.

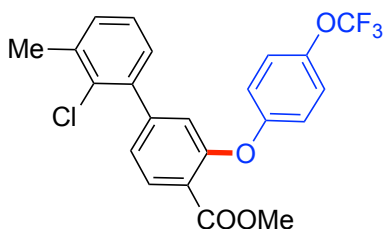

**7zw'** – Colorless oil, 24 % (15.8 mg, 0.036 mmol)

**<sup>1</sup>H NMR** (500 MHz, CDCl<sub>3</sub>)  $\delta$  7.99 (d,  $J = 8.1$  Hz, 1H), 7.27 (dd,  $J = 8.1, 1.7$  Hz, 1H), 7.25 (dd,  $J = 1.8, 0.8$  Hz, 1H), 7.20 (t,  $J = 7.6$  Hz, 1H), 7.18 – 7.15 (m, 2H), 7.13 (dd,  $J = 7.5, 2.4$  Hz, 1H), 7.09 (d,  $J = 1.7$  Hz, 1H), 7.02 – 6.99 (m, 2H), 3.84 (s, 3H), 2.43 (s, 3H). **<sup>13</sup>C NMR** (101 MHz, CDCl<sub>3</sub>)  $\delta$  165.7, 156.2, 155.1, 145.9, 144.3 (m), 139.0, 137.3, 132.4, 131.7, 130.8, 128.4, 126.4, 125.3, 122.6 (2C), 122.5, 122.1, 118.7 (2C), 52.2, 20.9. (OCF<sub>3</sub> not detected) **<sup>19</sup>F NMR** (377 MHz, CDCl<sub>3</sub>)  $\delta$  -58.3. **HRMS (ESI):**  $m/z$  [M+H]<sup>+</sup> calcd for C<sub>22</sub>H<sub>17</sub>ClF<sub>3</sub>O<sub>4</sub><sup>+</sup>: 437.0762; found: 437.0743.

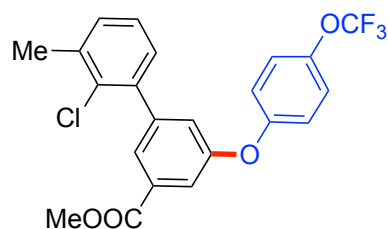

**7yw**

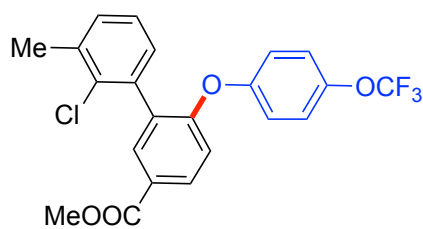

**7yw'**

**methyl 2'-chloro-3'-methyl-5-(4-(trifluoromethoxy)phenoxy)-[1,1'-biphenyl]-3-carboxylate 7yw and methyl 2'-chloro-3'-methyl-6-(4-(trifluoromethoxy)phenoxy)-[1,1'-biphenyl]-3-carboxylate 7yw'**

Following the **GP-D** using **2y** (61 mg, 0.15 mmol) and 4-trifluoromethoxy phenol **5w** (29  $\mu$ L, 0.23 mmol) **7yw** and **7yw'** were obtained in 80% total yield. Compounds separated by prep-TLC (Cy:EtOAc 9:1)

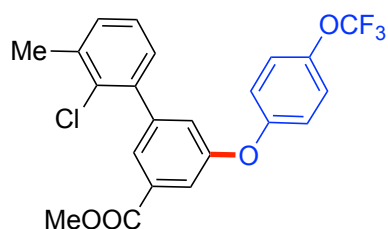

**7yw** – Colorless oil, 55% (35.8 mg, 0.082 mmol)

**<sup>1</sup>H NMR** (400 MHz, CDCl<sub>3</sub>)  $\delta$  7.78 (t,  $J$  = 1.5 Hz, 1H), 7.60 (dd,  $J$  = 2.4, 1.5 Hz, 1H), 7.22 (dd,  $J$  = 2.4, 1.6 Hz, 1H), 7.20 – 7.17 (m, 1H), 7.15 – 7.11 (m, 3H), 7.09 (dd,  $J$  = 7.4, 2.3 Hz, 1H), 7.01 – 6.97 (m, 2H), 3.83 (s, 3H), 2.36 (s, 3H). **<sup>13</sup>C NMR** (101 MHz, CDCl<sub>3</sub>)  $\delta$  166.2, 156.5, 155.2, 144.8 (q,  $J$  = 1.8 Hz), 142.2, 139.1, 137.2, 132.6, 131.8, 130.6, 128.6, 126.4, 126.0, 124.6, 122.7 (2C), 120.5 (q,  $J$  = 256.8 Hz), 119.8 (2C), 118.8, 52.4, 20.9. **<sup>19</sup>F NMR** (377 MHz, CDCl<sub>3</sub>)  $\delta$  -58.2. **HRMS (ESI)**:  $m/z$  [M+H]<sup>+</sup> calcd for C<sub>22</sub>H<sub>16</sub>ClF<sub>3</sub>NaO<sub>4</sub><sup>+</sup>: 459.0581; found: 459.0563.

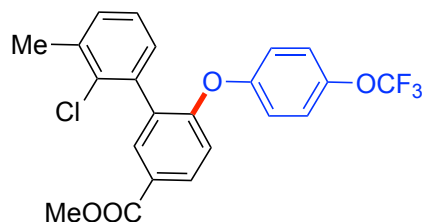

**7yw'** – Colorless oil, 26% (16.8 mg, 0.038 mmol)

**<sup>1</sup>H NMR** (400 MHz, CDCl<sub>3</sub>)  $\delta$  8.03 – 8.00 (m, 2H), 7.23 (dd,  $J$  = 7.7, 1.7 Hz, 1H), 7.19 (t,  $J$  = 7.4 Hz, 1H), 7.16 – 7.14 (m, 3H), 7.02 – 6.98 (m, 2H), 6.92 (d,  $J$  = 9.2 Hz, 1H), 3.91 (s, 3H), 2.41 (s, 3H). **<sup>13</sup>C NMR** (101 MHz, CDCl<sub>3</sub>)  $\delta$  166.4, 158.6, 154.3, 145.2 (q,  $J$  = 2.2 Hz), 136.6, 136.2, 133.8, 133.5, 131.1, 131.0, 130.5, 129.0, 126.1, 125.0, 122.5 (2C), 120.9 (2C), 120.4 (q,  $J$  = 257.1 Hz), 116.9, 52.1, 20.7. **<sup>19</sup>F NMR** (377 MHz, CDCl<sub>3</sub>)  $\delta$  -58.3. **HRMS (ESI)**:  $m/z$  [M+H]<sup>+</sup> calcd for C<sub>22</sub>H<sub>17</sub>ClF<sub>3</sub>O<sub>4</sub><sup>+</sup>: 437.0762; found: 437.0758.

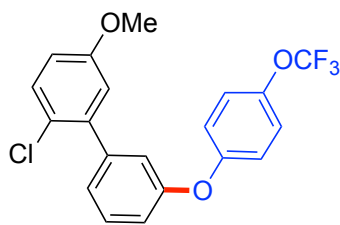

**7kw**  
Major  
(M)

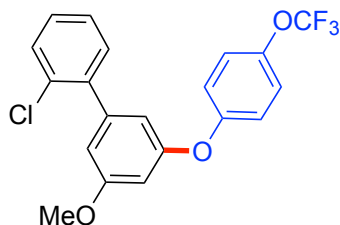

**7kw'**  
Minor  
(m)

**2-chloro-5-methoxy-3'-(4-(trifluoromethoxy)phenoxy)-1,1'-biphenyl 7kw and 2-chloro-3'-methoxy-5'-(4-(trifluoromethoxy)phenoxy)-1,1'-biphenyl 7kw'**

Following the **GP-D** using **2k** (30.5 mg, 0.1 mmol) and 4-trifluoromethoxy phenol **5w** (19.5  $\mu$ L, 0.15 mmol) **7kw** and **7kw'** were obtained as colorless oil in 81% yield. (32 mg, 0.081 mmol). **<sup>1</sup>H NMR** ratio **7kw:7kw'** 73:27

**<sup>1</sup>H NMR** (400 MHz, CDCl<sub>3</sub>)  $\delta$  7.65 – 7.63 (m, 1H, 1H m), 7.60 (t,  $J$  = 7.9 Hz, 1H, 1H M), 7.54 (d,  $J$  = 8.7 Hz, 1H, 1H M), 7.52 – 7.46 (m, 3H, 3H m), 7.41 – 7.37 (m, 5H, 3H M + 2H m), 7.31 (dd,  $J$  = 2.2, 1.9 Hz, 1H, 1H M), 7.27 – 7.21 (m, 5H, 3H M + 2H m), 7.06 (d,  $J$  = 2.9 Hz, 1H, 1H M), 7.02 (dd,  $J$  = 8.7, 3.1 Hz, 1H, 1H M), 6.94 (dd,  $J$  = 2.3, 1.3 Hz, 1H, 1H m), 6.87 (dd,  $J$  = 2.2, 1.3 Hz, 1H, 1H m), 6.79 (t,  $J$  = 2.3 Hz, 1H, 1H m), 4.01 (s, 3H, 3H m), 3.99 (s, 3H, 3H M). **<sup>13</sup>C NMR** (101 MHz, CDCl<sub>3</sub>)  $\delta$  160.6 (Cq m), 158.2 (Cq M), 157.4 (Cq m), 156.4 (Cq M), 155.7 (Cq M), 155.5 (Cq m), 144.6 (d,  $J$  = 2.1 Hz, 1Cq m), 144.5 (q,  $J$  = 2.1 Hz, 1Cq M), 141.8 (Cq m), 141.3 (Cq M), 140.4 (Cq M), 139.7 (Cq m), 132.3 (Cq M), 131.8 (Cq m), 131.0 (CH m), 130.7 (CH M), 130.0 (CH m), 129.6 (CH M), 128.9 (CH m), 126.8 (CH m), 124.8 (CH M), 123.7 (2CH m), 122.6 (2CH M), 120.8 (d,  $J$  = 297.1 Hz, C<sub>CF3</sub> m), 120.5 (q,  $J$  = 256.8 Hz, C<sub>CF3</sub> M), 120.1 (CH M), 119.8 (2CH m), 119.6 (2CH M), 118.2 (CH M), 116.5 (CH M), 114.5 (CH M), 112.4 (CH m), 110.6 (CH m), 104.3 (CH m), 55.6 (C<sub>OMe</sub> M), 55.5 (C<sub>OMe</sub> m). **<sup>19</sup>F NMR** (377 MHz, CDCl<sub>3</sub>)  $\delta$  -58.2, -58.2. **HRMS (APCI)**:  $m/z$  [M]<sup>+</sup> calcd for C<sub>20</sub>H<sub>14</sub>ClF<sub>3</sub>O<sub>3</sub><sup>+</sup>: 394.0578; found: 394.0581.

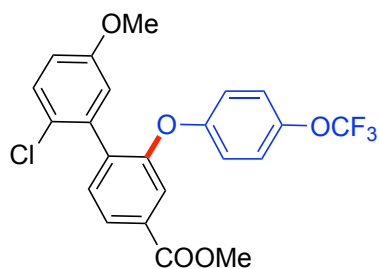

**7tw**

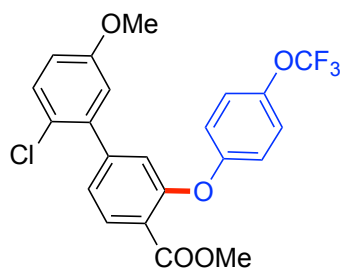

**7tw'**

**methyl 2'-chloro-5'-methoxy-2-(4-(trifluoromethoxy)phenoxy)-[1,1'-biphenyl]-4-carboxylate 7tw and methyl 2'-chloro-5'-methoxy-3-(4-(trifluoromethoxy)phenoxy)-[1,1'-biphenyl]-4-carboxylate 7tw'**

Following the **GP-D** using **2t** (36 mg, 0.1 mmol) and 4-trifluoromethoxy phenol **5w** (19.5  $\mu$ L, 0.15 mmol) **7tw** and **7tw'** were obtained in 62% total yield. Compounds separated by prep-TLC (Cy:EtOAc 15:1). **7tw**:**7tw'** 86:14

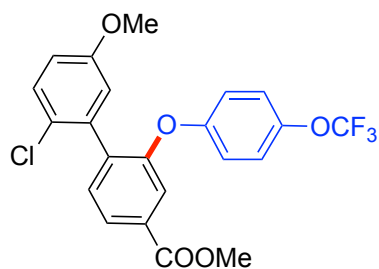

**7tw** – 53% (24 mg, 0.053 mmol)

**<sup>1</sup>H NMR** (400 MHz, CDCl<sub>3</sub>)  $\delta$  7.72 (dd,  $J$  = 7.9, 1.7 Hz, 1H), 7.49 (d,  $J$  = 1.6 Hz, 1H), 7.25 (d,  $J$  = 7.9 Hz, 1H), 7.13 (dd,  $J$  = 8.3, 0.9 Hz, 1H), 6.96 – 6.93 (m, 2H), 6.78 – 6.74 (m, 2H), 6.67 – 6.63 (m, 2H), 3.74 (s, 3H), 3.58 (s, 3H). **<sup>13</sup>C NMR** (101 MHz, CDCl<sub>3</sub>)  $\delta$  166.1, 157.9, 155.2, 154.1, 144.6 (q,  $J$  = 2.1 Hz), 136.4, 135.8, 132.0, 131.6, 130.2, 124.7 (2C), 122.5 (2C), 120.4 (d,  $J$  = 256.8 Hz), 119.8, 119.6 (2C), 116.5, 115.1, 55.5, 52.3. **<sup>19</sup>F NMR** (377 MHz, CDCl<sub>3</sub>)  $\delta$  -58.27. **HRMS (ESI)**:  $m/z$  [M+K]<sup>+</sup> calcd for C<sub>22</sub>H<sub>16</sub>ClF<sub>3</sub>KO<sub>5</sub><sup>+</sup>: 491.0270; found: 491.0252.

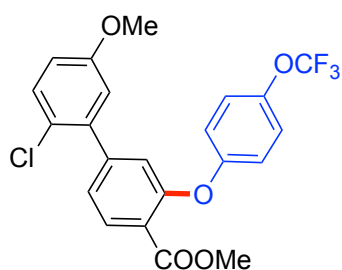

**7tw'** – 9% (4 mg, 0.0088 mmol)

**<sup>1</sup>H NMR** (400 MHz, CDCl<sub>3</sub>)  $\delta$  8.00 (d,  $J$  = 8.0 Hz, 1H), 7.35 (dd,  $J$  = 8.4, 0.8 Hz, 1H), 7.29 (dd,  $J$  = 8.1, 1.7 Hz, 1H), 7.19 – 7.16 (m, 2H), 7.11 (d,  $J$  = 1.7 Hz, 1H), 7.02 – 6.98 (m, 2H), 6.87 – 6.83 (m, 2H), 3.84 (s, 3H), 3.80 (s, 3H). **<sup>13</sup>C NMR** (101 MHz, CDCl<sub>3</sub>)  $\delta$  165.6, 158.3, 156.1, 155.1, 145.1, 144.4 (m), 139.2, 131.8, 130.9, 125.1, 124.7 – 121.7 (m), 123.5, 122.6 (2C), 122.4, 122.3, 118.7 (2C), 116.4, 114.9, 55.6, 52.3. **<sup>19</sup>F NMR** (377 MHz, CDCl<sub>3</sub>)  $\delta$  -58.3. **HRMS (ESI)**:  $m/z$  [M+H]<sup>+</sup> calcd for C<sub>22</sub>H<sub>17</sub>ClF<sub>3</sub>O<sub>5</sub><sup>+</sup>: 453.0711; found: 453.0693.

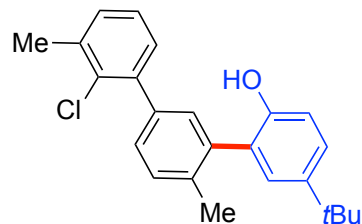

**5-(tert-butyl)-2''-chloro-3'',6'-dimethyl-[1,1':3',1''-terphenyl]-2-ol **6wb****

Following the **GP-C** using **2w** (55 mg, 0.15 mmol) and 4-tert-butylphenol **5b** (34 mg, 0.23 mmol) **6wb** was obtained in 52% yield (28.3 mg, 0.078 mmol). Regioselective ratio determined by <sup>1</sup>HNMR *m:o* 87:13

<sup>1</sup>H NMR (400 MHz, CDCl<sub>3</sub>) δ 7.46 – 7.46 (m, 2H), 7.42 – 7.42 (m, 1H), 7.35 (dd, *J* = 8.5, 2.5 Hz, 1H), 7.30 – 7.25 (m, 3H), 7.24 (d, *J* = 2.5 Hz, 1H), 6.99 (d, *J* = 8.5 Hz, 1H), 4.84 (s, 1H), 2.51 (s, 3H), 2.30 (s, 3H), 1.37 (s, 9H). <sup>13</sup>C NMR (101 MHz, CDCl<sub>3</sub>) δ 150.2, 143.1, 140.2, 138.3, 137.0, 136.6, 136.0, 132.7, 131.5, 130.4, 130.0, 129.3, 128.9, 127.2, 126.7, 126.2, 125.9, 114.8, 34.1, 31.6 (3C), 21.0, 19.7. **HRMS (APCI)**: *m/z* [M]<sup>+</sup> calcd for C<sub>24</sub>H<sub>25</sub>ClO<sup>+</sup>: 364.1588; found: 364.1597.

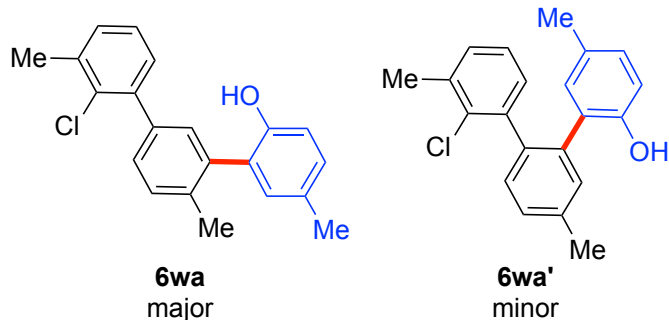

**2''-chloro-3'',5,6'-trimethyl-[1,1':3',1''-terphenyl]-2-ol **6wa** and 2''-chloro-3'',5,5'-trimethyl-[1,1':2',1''-terphenyl]-2-ol **6wa'****

Following the **GP-C** using **2w** (55 mg, 0.15 mmol) and p-cresol **5a** (24 mg, 0.23 mmol) **6wa** and **6wa'** were obtained in 59% yield (28.5 mg, 0.088 mmol). Regioselective ratio determined by <sup>1</sup>HNMR *m:o* 74:26

<sup>1</sup>H NMR (400 MHz, CDCl<sub>3</sub>) δ 7.40 – 7.39 (m, 2H, 2H M), 7.33 – 7.29 (m, 2H, 1H M, 2H m), 7.25 – 7.19 (m, 4H, 3H M, 1H m), 7.09 – 7.06 (m, 2H, 1H M, 1H m), 6.98 – 6.95 (m, 2H, 1H M, 1H m), 6.90 (d, *J* = 8.2 Hz, 1H, 1H M), 6.91 – 6.87 (m, 2H, 2H m), 6.79 (d, *J* = 2.2 Hz, 1H, 1H m), 6.67 (d, *J* = 8.2 Hz, 1H, 1H m), 4.81 (s, 1H, 1H m), 4.73 (s, 1H, 1H M), 2.45 (s, 6H, 3H M, 3H m), 2.35 (s, 3H, 3H m), 2.31 (s, 3H, 3H M), 2.25 (s, 3H, 3H M), 2.14 (s, 3H, 3H m). <sup>13</sup>C NMR (101 MHz, CDCl<sub>3</sub>) δ 150.3, 140.2, 138.3, 137.0, 136.5, 135.6, 131.5, 131.3, 130.6, 130.3, 130.0, 129.6, 129.4, 128.9, 127.2, 126.2, 115.1, 21.0, 20.5, 20.4, 19.6. (<sup>13</sup>C NMR only the Major product). **HRMS (ESI)**: *m/z* [M+H]<sup>+</sup> calcd for C<sub>22</sub>H<sub>19</sub>ClO<sup>+</sup>: 322.1119; found: 322.1116.



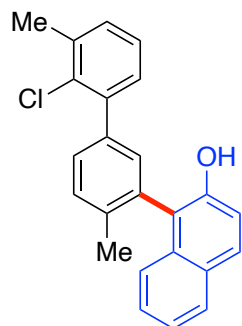

### 1-(2'-chloro-3',4-dimethyl-[1,1'-biphenyl]-3-yl)naphthalen-2-ol **6wu**

Following the **GP-C** using **2u** (55 mg, 0.15 mmol) and 2-naphthol **5u** (32 mg, 0.23 mmol) **6wu** was obtained in 59% yield (32 mg, 0.089 mmol). Regioselective ratio determined by  $^1\text{H NMR}$  *m:o* 83:17

$^1\text{H NMR}$  (400 MHz,  $\text{CDCl}_3$ )  $\delta$  7.84 – 7.82 (m, 2H), 7.51 – 7.51 (m, 2H), 7.40 – 7.39 (m, 2H), 7.36 – 7.31 (m, 3H), 7.29 (d,  $J = 8.9$  Hz, 1H), 7.23 – 7.21 (m, 2H), 5.08 (s, 1H), 2.45 (s, 3H), 2.10 (s, 3H).  $^{13}\text{C NMR}$  (101 MHz,  $\text{CDCl}_3$ )  $\delta$  150.2, 140.1, 138.7, 138.1, 137.0, 133.0, 132.8, 132.7 (2C), 130.7, 130.0, 129.9, 129.5, 128.9, 128.8, 128.1, 126.6, 126.2, 124.5, 123.3, 119.9, 117.3, 21.0, 19.3. **HRMS (APCI):**  $m/z$   $[\text{M}]^+$  calcd for  $\text{C}_{24}\text{H}_{19}\text{ClO}^+$ : 358.1119; found: 358.1090.

## Cycloadditions with cyclic diaryl $\lambda^3$ -chloranes

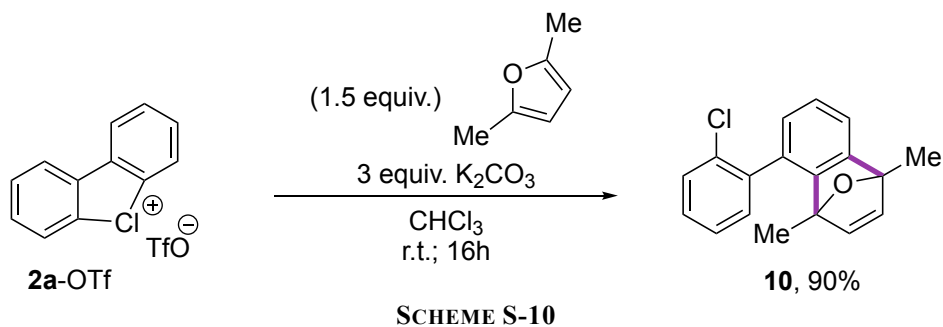

A vial was charged with **2a-OTf** (50.5 mg, 0.15 mmol, 1 equiv.) and  $K_2CO_3$  (62 mg, 0.45 mmol, 3 equiv). The vial was evacuated and back refilled with Argon three times. Subsequently, under argon, 2,5-dimethylfuran (24  $\mu$ L, 0.23 mmol, 1.5 equiv) was added followed by  $CHCl_3$  (1.5 mL, 0.1 M). The resulting heterogeneous mixture was stirred at room temperature for 16 hours. The conversion was controlled by GCMS and TLC. The mixture was diluted with EtOAc (3 mL) and filtered. After removal of volatile components, the crude was purified through Prep-TLC to afford the product as colorless oil in 90% yield (0.13 mmol, 38 mg). **10** has been obtained as mixture of two atropoisomers,  $^1H$  NMR ratio of 71:29.

$^1H$  NMR (400 MHz,  $CDCl_3$ )  $\delta$  7.42 (dd,  $J = 7.7, 1.5$  Hz, 1H, 1H m), 7.38 – 7.36 (m, 1H, 1H M), 7.29 – 7.18 (m, 5H, 2H m + 3H M), 7.09 (dd,  $J = 7.1, 1.0$  Hz, 2H, 1H M + 1H m), 7.00 – 6.93 (m, 4H, 2H M + 2H m), 6.79 (dd,  $J = 7.8, 1.0$  Hz, 1H, 1H m), 6.75 – 6.99 (m, 4H, 2H M + 2H m), 1.87 (s, 3H, 3H m), 1.85 (s, 3H, 3H M), 1.28 (s, 3H, 3H M), 1.25 (s, 3H, 3H m).  $^{13}C$  NMR (101 MHz,  $CDCl_3$ )  $\delta$  153.0, 152.7, 150.7, 149.9, 147.3, 146.6, 146.5, 145.8, 139.0, 138.6, 133.5, 133.3, 132.0, 131.9, 131.4, 131.1, 129.6, 129.0, 129.0, 128.8, 126.7, 126.7, 126.5, 126.1, 125.0, 124.2, 117.7, 117.6, 89.6, 89.6, 88.1, 87.9, 16.4, 16.0, 15.4, 15.2. HRMS (APCI):  $m/z$   $[M+H]^+$  calcd for  $C_{18}H_{16}ClO^+$ : 283.0884; found: 283.0896.

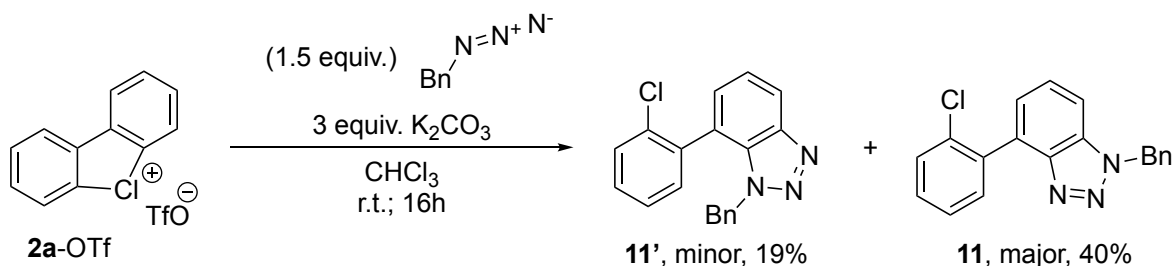

SCHEME S-11

To a dry vial were charged **2a-OTf** (50.5 mg, 0.15 mmol, 1 equiv.) and  $K_2CO_3$  (62 mg, 0.45 mmol, 3 equiv). The vial was evacuated and back refilled with Argon three times. Subsequently, under argon, Benzyl azide (30 mg, 0.23 mmol, 1.5 equiv.) was added followed by  $CHCl_3$  (1.0 mL, 0.1 M). The resulting heterogeneous mixture was stirred at room temperature for 16 hours. The conversion was controlled by GCMS and TLC. The mixture was diluted with EtOAc (3 mL) and filtered. After removal of volatile components, the crude was purified through Prep-TLC to afford the pure products as colorless oil in 59% total yield.

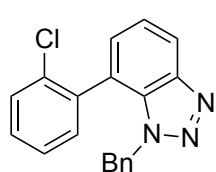

**1-benzyl-7-(2-chlorophenyl)-1H-benzo[d][1,2,3]triazole 11'**, (9 mg, 0.028 mmol, 19%)

**$^1H$  NMR** (400 MHz,  $CDCl_3$ )  $\delta$  8.14 (dd,  $J = 8.3, 1.0$  Hz, 1H), 7.48 (dd,  $J = 8.1, 1.3$  Hz, 1H), 7.43 – 7.37 (m, 2H), 7.22 (dd,  $J = 7.1, 1.0$  Hz, 1H), 7.15 – 7.11 (m, 1H), 7.07 – 7.03 (m, 2H), 7.18 (td,  $J = 7.5, 1.3$  Hz, 1H), 6.97 (dd,  $J = 7.6, 1.7$  Hz, 1H), 6.46 – 6.44 (m, 2H), 5.74 (d,  $J = 15.8$  Hz, 1H), 5.35 (d,  $J = 15.9$  Hz, 1H).  **$^{13}C$  NMR** (101 MHz,  $CDCl_3$ )  $\delta$  146.8, 136.1, 135.6, 134.2, 131.9, 130.6, 129.8, 129.3, 129.1, 128.3 (2C), 127.6, 126.7, 126.3 (2C), 123.8, 123.2, 119.9, 52.8. **HRMS (APCI)**:  $m/z$   $[M+H]^+$  calcd for  $C_{18}H_{15}ClN_3^+$ : 320.0949; found: 320.0946.

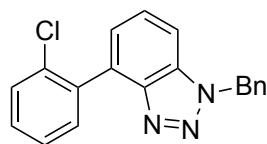

**1-benzyl-4-(2-chlorophenyl)-1H-benzo[d][1,2,3]triazole 11**, (19 mg, 0.059 mmol, 40%)

**$^1H$  NMR** (400 MHz,  $CDCl_3$ )  $\delta$  7.55 – 7.52 (m, 1H), 7.49 – 7.47 (m, 1H), 7.40 – 7.37 (m, 1H), 7.34 – 7.27 (m, 5H), 7.26 – 7.23 (m, 4H), 5.80 (s, 2H).  **$^{13}C$  NMR** (101 MHz,  $CDCl_3$ )  $\delta$  144.9, 135.7, 134.7, 133.2, 133.1, 132.4, 131.3, 130.1, 129.4, 129.0 (2C), 128.5, 127.6 (2C), 127.0, 126.7, 125.1, 109.3, 52.4. **HRMS (APCI)**:  $m/z$   $[M+H]^+$  calcd for  $C_{18}H_{15}ClN_3^+$ : 320.0949; found: 320.0945.

## General procedure, Optimization and Set-up of metal free C-O arylation of phenols with cyclic diaryl $\lambda^3$ -chloranes

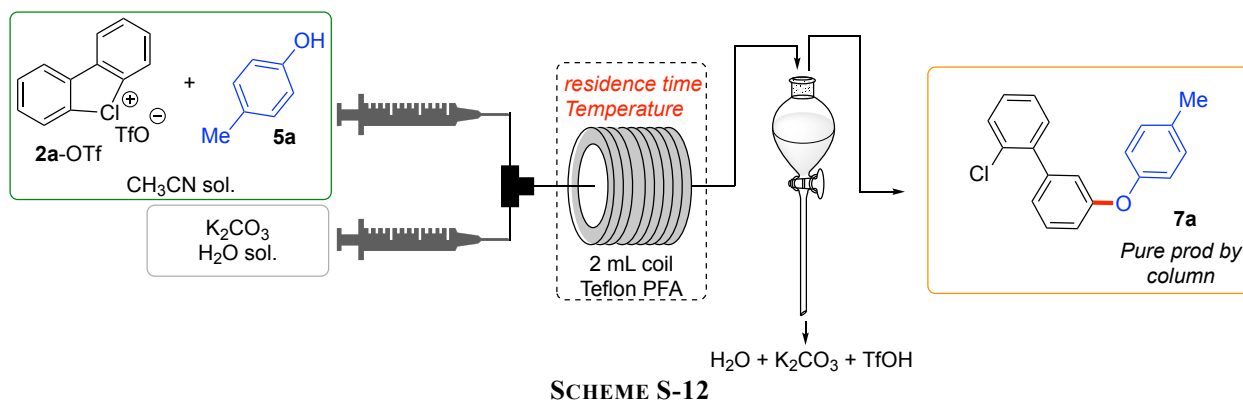

After the equilibration of the reactor, the solutions (1) **2a-OTf** (168 mg, 0.5 mmol, 1 equiv) and **5a** (81 mg, 0.75 mmol, 1.5 equiv. or 162 mg, 1.5 mmol, 3 equiv.) in CH<sub>3</sub>CN (1.5 mL) and (2) K<sub>2</sub>CO<sub>3</sub> (414 mg, 3 mmol, 6 equiv.) in H<sub>2</sub>O (3 mL) were prepared separately and charged in syringes. The infusion proceeds under the corresponding reaction conditions reported below. The biphasic mixture was collected. The water phase was washed with EtOAc (3 times), the organic phases were collected, dried over Na<sub>2</sub>SO<sub>4</sub> and concentrated. The <sup>1</sup>H NMR of the crude was recorded, yields were calculated using CH<sub>2</sub>Br<sub>2</sub> as internal standard (20  $\mu$ L, 0.284 mmol). The pure product was isolated by flash chromatography (Cyclohexane/EtOAc 95:5).

| Entry | Syringe (1) or (2) | Mmol Phenols | Flow rate syringe (mL/min) | Flow Reactor (mL/min) | Temp. (°C) | Residence time (min) | NMR Yield % (Isolated yield) |
|-------|--------------------|--------------|----------------------------|-----------------------|------------|----------------------|------------------------------|
| 1     | (1)                | 1.5          | 0.05                       | 0.15                  | r.t.       | 13.3                 | 48%                          |
|       | (2)                |              | 0.1                        |                       |            |                      |                              |
| 2     | (1)                | 1.5          | 0.03                       | 0.09                  | r.t.       | 22.2                 | 42%                          |
|       | (2)                |              | 0.06                       |                       |            |                      |                              |
| 3     | (1)                | 3            | 0.05                       | 0.15                  | r.t.       | 13.3                 | 89% (72%)                    |
|       | (2)                |              | 0.1                        |                       |            |                      |                              |

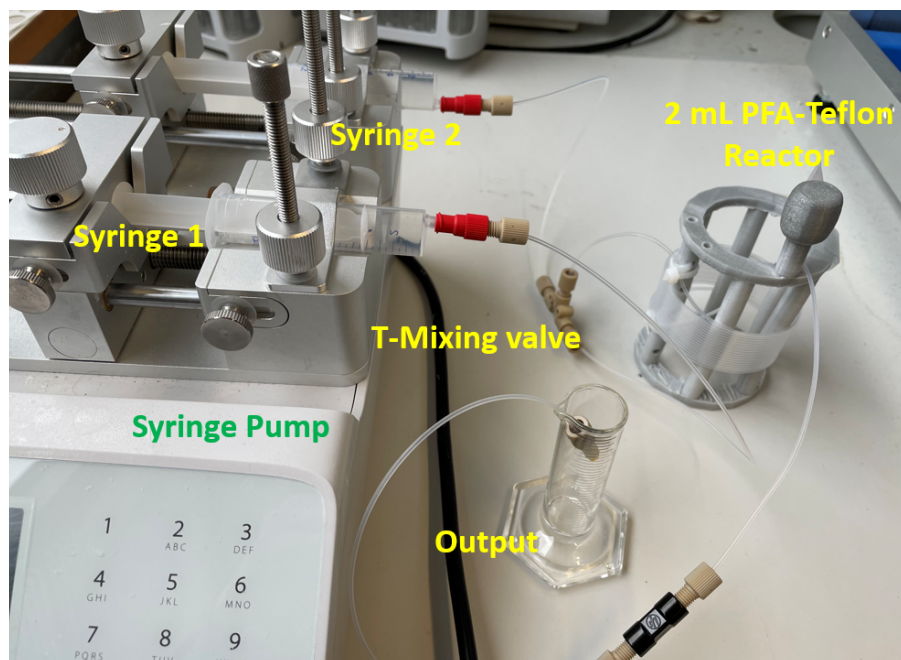

**Set-Up:** *Syringe pump:* Chemyx Fusion 4000; *Tubing:* Index Health & Science (1912L) PFA+ Tubing Natural 1/16" OD x .030" ID x 50ft; *Valve:* PEEK Low Pressure Tee Assembly 1/16" PEEK .020 thru hole; *Syringes:* 2mL, 6mL, 10mL, 20 mL NORM-JECT®

| <i>Reactor Configuration</i> |             |                                     |                  |
|------------------------------|-------------|-------------------------------------|------------------|
| tube ID (mm)                 | radius (mm) | Volume tube (mL = cm <sup>3</sup> ) | length tube (cm) |
| 0.75                         | 0.0375      | 2                                   | 453              |

# Crude $^1\text{H}$ NMR of *Entry 3*

FCML1281-2214.1.fid

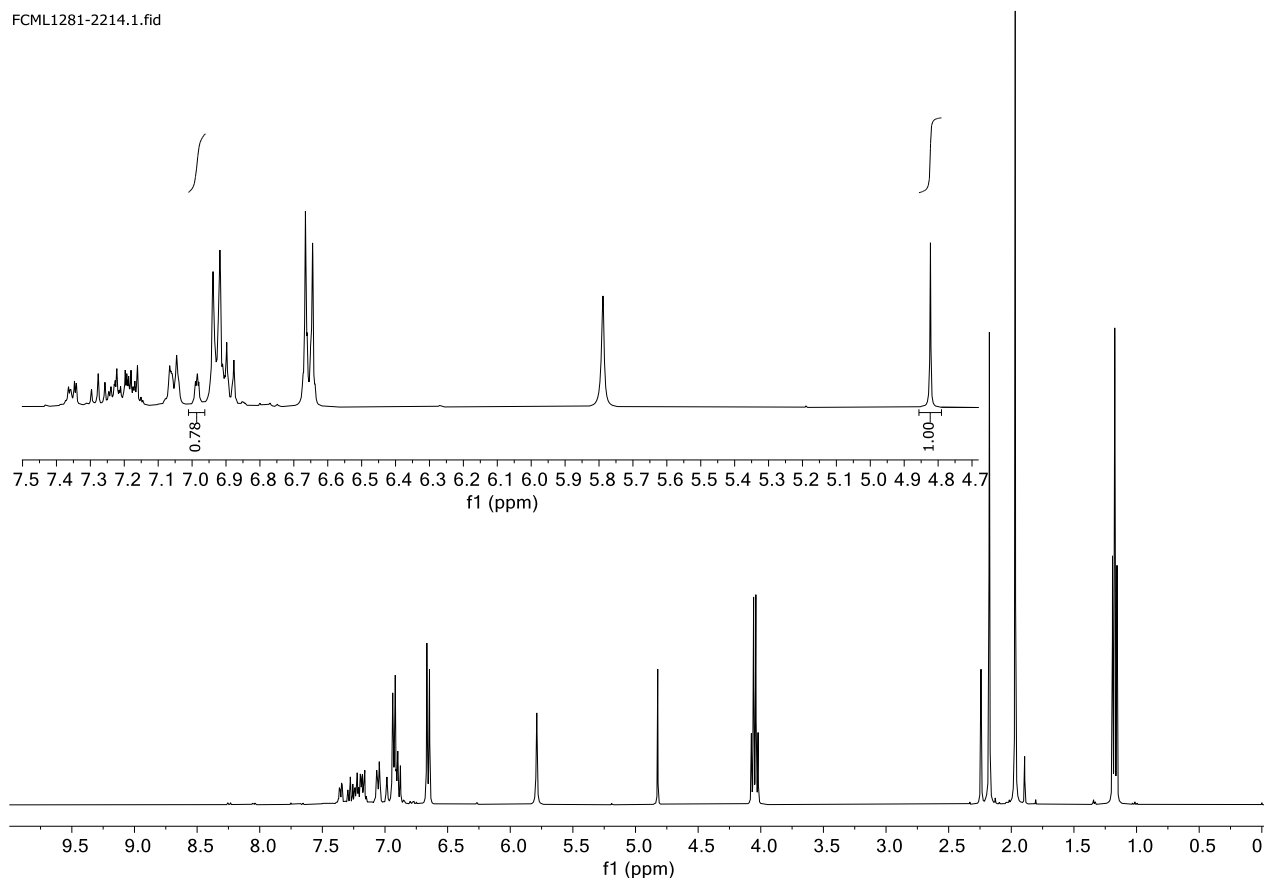

### Preparation of deuterated substrates:

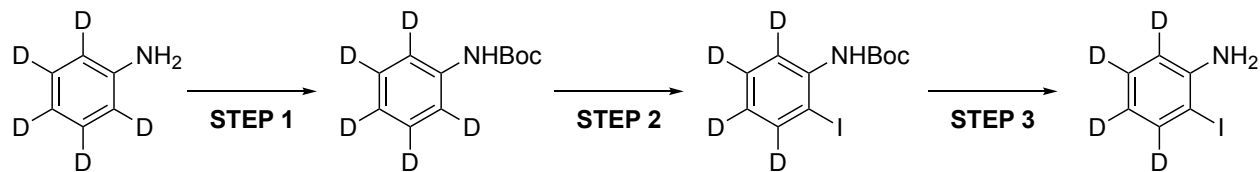

SCHEME S-13

**Step 1:** A solution of aniline-2,3,4,5,6-D<sub>5</sub> (1 mL, 11 mmol, 1 equiv) and *t*-butyl-dicarbonate (2.87 g, 13.2 mmol, 1.2 equiv) in dry THF (22 mL, M 0.5) was stirred at room temperature for 16h. The resulting mixture was concentrated and purified by flash chromatography column to obtain the *t*-butyl N-[(2,3,4,5,6-D<sub>5</sub>)phenyl]carbamate as a white solid in quantitative yield. (2.15 g, 10.8 mmol).

**Step 2:** To a schlenk tube was added *t*-butyl N-[(2,3,4,5,6-<sup>2</sup>H<sub>5</sub>)phenyl]carbamate ( g, 5.04 mmol, 1 equiv), Pd(OAc)<sub>2</sub> (1.19 g, 5.3 mmol, 1.05 equiv), dry TsOH (1.74 g, 10.08 mmol, 2 equiv) and dry MeOH (30 mL, 0.17 M). The resulting mixture was stirred for 24 hours at room temperature. NIS (1.2 g, 5.3 mmol, 1.05 equiv) was added and the reaction mixture was stirred for 30 minutes at room temperature. The resulting mixture was filtered through a pad of celite and concentrated. The residue was diluted with water, quenched with saturated aqueous Na<sub>2</sub>S<sub>2</sub>O<sub>3</sub> solution and extracted with ethyl acetate (3 times). The combined organic layers were dried over anhydrous MgSO<sub>4</sub>, filtered and concentrated under reduced pressure. The crude was purified through flash chromatography column yielding the *t*-butyl N-[2-iodo(3,4,5,6-<sup>2</sup>H<sub>4</sub>)phenyl]carbamate as colorless oil in 21% yield. (343 mg, 1.059 mmol).

**Step 3:** To a solution of *t*-butyl N-[2-iodo(3,4,5,6-<sup>2</sup>H<sub>4</sub>)phenyl]carbamate (343 mg, 1.06 mmol, 1 equiv) in dry DCM (5 mL, 0.2 M) at 0 °C was added dropwise TFA (0.93 mL, 12.57 mmol, 12.7 equiv). The resulting mixture was stirred 3 hours at room temperature. The reaction was quenched with NaHCO<sub>3</sub> extracted with EtOAc, dried concentrated to yield the crude 2-iodo(<sup>2</sup>H<sub>4</sub>)aniline as pale brown solid in quantitative yield. (219 mg, 0.98 mmol) The product was used without further purification.

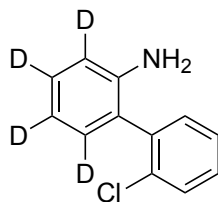

**2'-chloro-[1,1'-biphenyl]-3,4,5,6-d<sub>4</sub>-2-amine 1a-[D<sub>4</sub>]**

Following the **GP-A** using 2'-chloro-[1,1'-biphenyl]-3,4,5,6-d<sub>4</sub>-2-amine (443 mg, 2 mmol) and 2-chlorophenylboronic acid (341 mg, 2.2 mmol) **1a-[D<sub>4</sub>]** was obtained as colorless solid in 58% yield (1.16 mmol, 241 mg).

**<sup>1</sup>H NMR** (400 MHz, CDCl<sub>3</sub>) δ 7.52 – 7.49 (m, 1H), 7.35 – 7.31 (m, 3H), 3.38 (brs, 2H). **<sup>13</sup>C NMR** (101 MHz, CDCl<sub>3</sub>) δ 143.6, 137.9, 133.9, 131.9, 129.9, 129.0, 127.2, 125.2. **HRMS (ESI):** m/z [M+H]<sup>+</sup> calcd for C<sub>12</sub>H<sub>7</sub>ClD<sub>4</sub>N<sup>+</sup>: 208.0826; found: 208.0840.

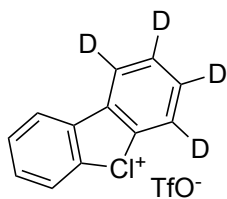

**dibenzo[b,d]chlorol-5-ium-1,2,3,4-d<sub>4</sub> trifluoromethanesulfonate 2a-[D<sub>4</sub>]-OTf**

Following the **GP-B** using **1a-[D<sub>4</sub>]** (241 mg, 1.16 mmol) and triflic acid (103 μL, 1.16 mmol) **2a-[D<sub>4</sub>]-OTf** was obtained as white solid in 63% yield (0.73 mmol, 248 mg)

**<sup>1</sup>H NMR** (400 MHz, DMSO) δ 8.69 – 8.65 (m, 2H), 8.01 (tdd, *J* = 7.5, 5.0, 1.1 Hz, 1H), 7.95 (ddd, *J* = 9.0, 7.4, 1.8 Hz, 1H). **<sup>13</sup>C NMR** (101 MHz, DMSO) δ 140.1 (2C), 132.0 (3C), 131.7, 125.5, 122.9. **<sup>19</sup>F NMR** (377 MHz, DMSO) δ -77.7. **HRMS (ESI):** m/z [M-TfO]<sup>+</sup> calcd for C<sub>12</sub>H<sub>4</sub>ClD<sub>4</sub><sup>+</sup>: 191.0560; found: 191.0560.



## Mechanistic Investigations:

### Competition experiments: Metal-free CDC C-C bond formation with cyclic diaryl $\lambda^3$ -chloranes

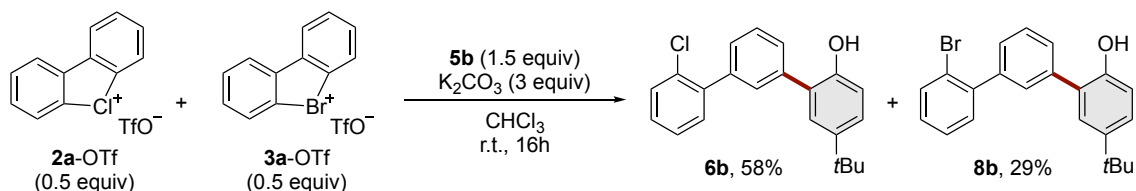

SCHEME S-14

An oven dried vial was charged with **2a-OTf** (25.3 mg, 0.075 mmol, 0.5 equiv.), **3a-OTf** (28.6 mg, 0.075 mmol, 0.5 equiv.), 4-(*tert*-butyl)phenol **5b** (33.8 mg, 0.23 mol, 1.5 equiv), and  $K_2CO_3$  (62 mg, 0.45 mmol, 3 equiv.). The vial was evacuated and back refilled with Argon three times. Subsequently,  $CHCl_3$  (1.5 mL, 0.1M) was added. The resulting heterogeneous mixture was stirred at room temperature for 16 hours. The crude was purified through Prep-TLC (Cy:EtOAc 9:1) yielding **6b** and **8b** as a mixture (23 mg) with a ratio of 2:1 from which yields were determinate.

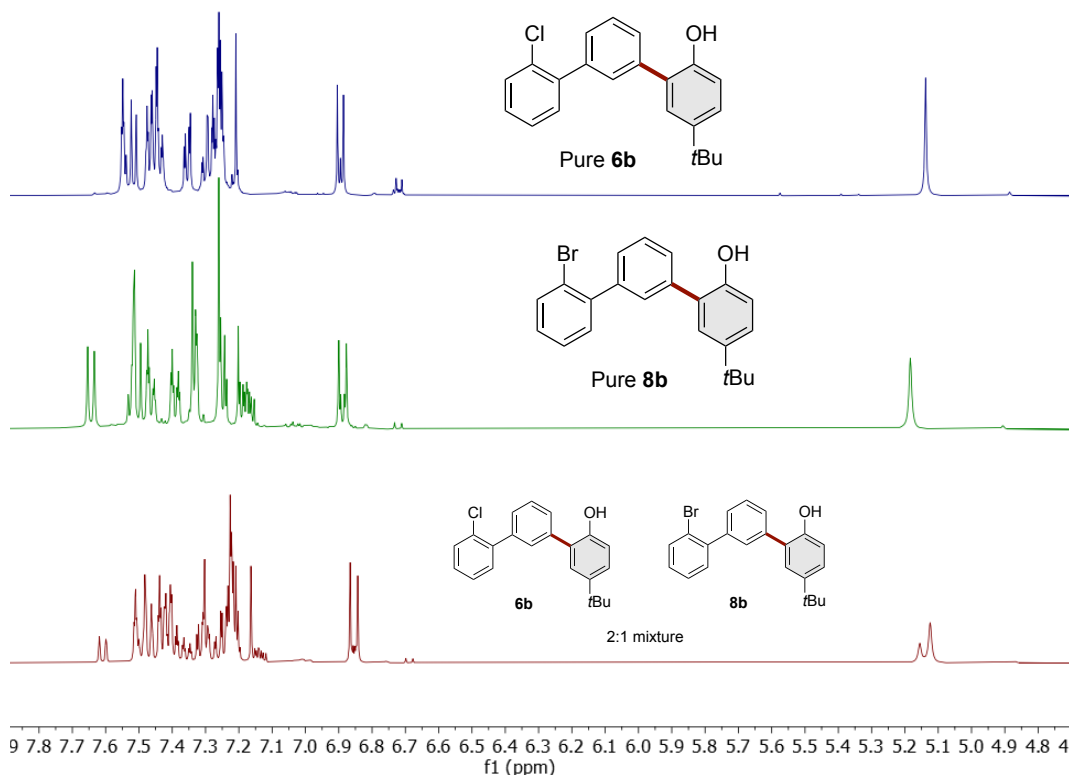

## Competition experiments: Metal free C-O arylation of phenols with cyclic diaryl $\lambda^3$ -chloranes

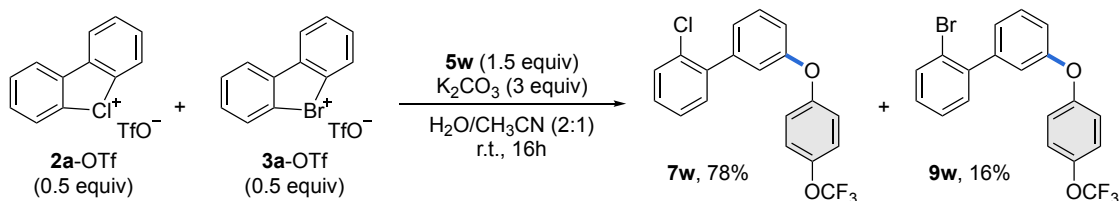

SCHEME S-15

An oven dried vial was charged with **2a-OTf** (25.3 mg, 0.075 mmol, 0.5 equiv.), **3a-OTf** (28.6 mg, 0.075 mmol, 0.5 equiv.), 4-(trifluoromethoxy)phenol **5w** (29.2  $\mu\text{L}$ , 0.23 mol, 1.5 equiv.), and  $\text{K}_2\text{CO}_3$  (62 mg, 0.45 mmol, 3 equiv.). The vial was evacuated and back refilled with Argon three times. Subsequently,  $\text{H}_2\text{O}$  (1 mL) and  $\text{CH}_3\text{CN}$  (0.5 mL) were added. The resulting heterogeneous mixture was stirred at room temperature for 16 hours. The crude was purified through Prep-TLC (Cy:EtOAc 9:1) yielding **7w** and **9w** as a mixture (26 mg) with a ratio of 5:1 from which yields were determined.

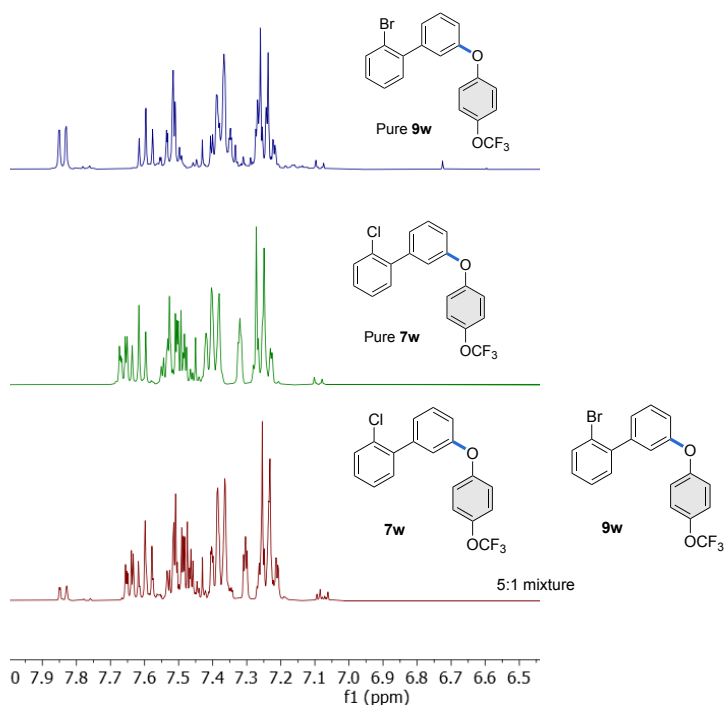

## Deuterated solvent: Metal free C-O arylation of phenols with cyclic diaryl $\lambda^3$ -chloranes

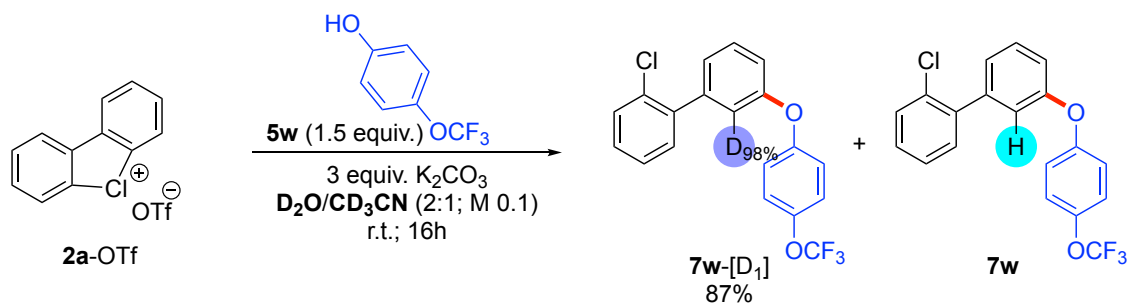

SCHEME S-16

An oven dried vial was charged with **2a-OTf** (51 mg, 0.15 mmol, 1 equiv.) and  $K_2CO_3$  (62 mg, 0.45 mmol, 3 equiv.). The vial was evacuated and back refilled with Argon three times. Subsequently, under argon, 4-trifluoromethoxy phenol **5w** (29  $\mu$ L, 0.23 mmol, 1.5 equiv.) was added followed by  $D_2O$  (1 mL) and  $CD_3CN$  (0.5 mL). The conversion was verified by GCMS and TLC. The mixture was extracted with EtOAc (3 mL x 3 times). The extracts were combined, dried over  $MgSO_4$ , and filtered. After removal of volatile components, the crude was purified through Prep-TLC (Cy:EtOAc 9:1) yielding **7w-[D]<sub>1</sub>** as colorless oil in 87% yield. (47.7 mg, 0.13 mmol).

$^1H$  NMR (400 MHz,  $CDCl_3$ )  $\delta$  7.66 – 7.64 (m, 1H), 7.62 – 7.58 (m, 1H), 7.54 – 7.45 (m, 3H), 7.41 – 7.37 (m, 3H), 7.26 – 7.21 (m, 3H).  $^{13}C$  NMR (101 MHz,  $CDCl_3$ )  $\delta$  156.3, 155.7, 144.5 (dd,  $J$  = 3.9, 1.7 Hz), 141.2, 139.6, 132.4, 131.2, 130.0, 129.6, 128.8, 126.9, 124.9, 122.6 (2C), 120.5 (q,  $J$  = 256.8 Hz), 119.6 (2C), 118.2. HRMS (APCI):  $m/z$   $[M]^+$  calcd for  $C_{19}H_{11}ClDF_3O_2^+$ : 365.0535; found: 365.0529.

FCST043-HC-2207.1.fid

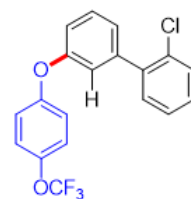

FCML1213-HC-2208.1.fid

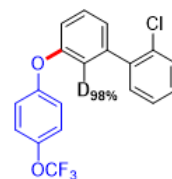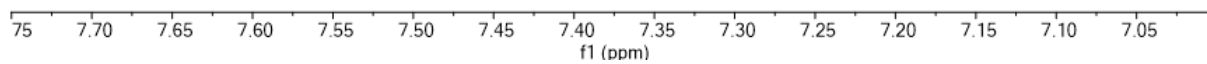

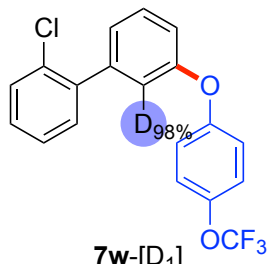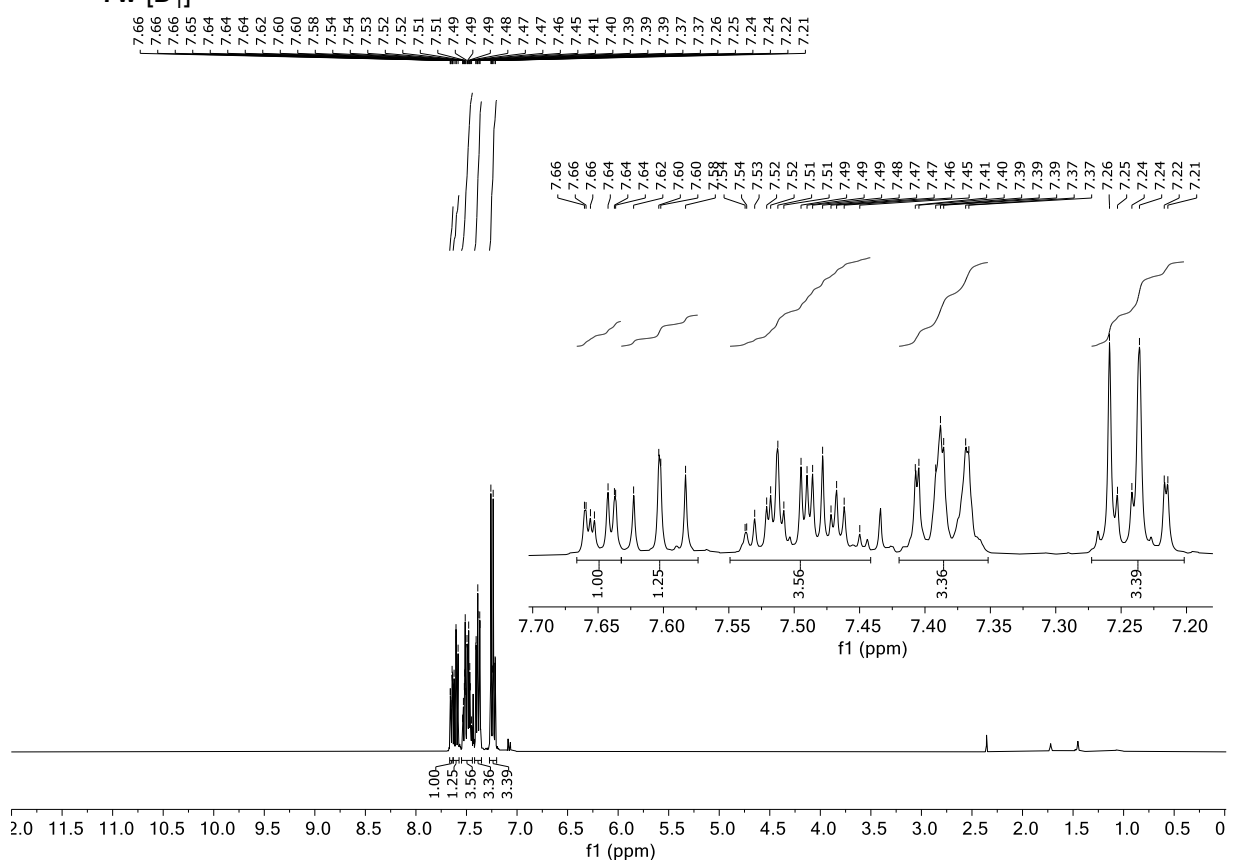

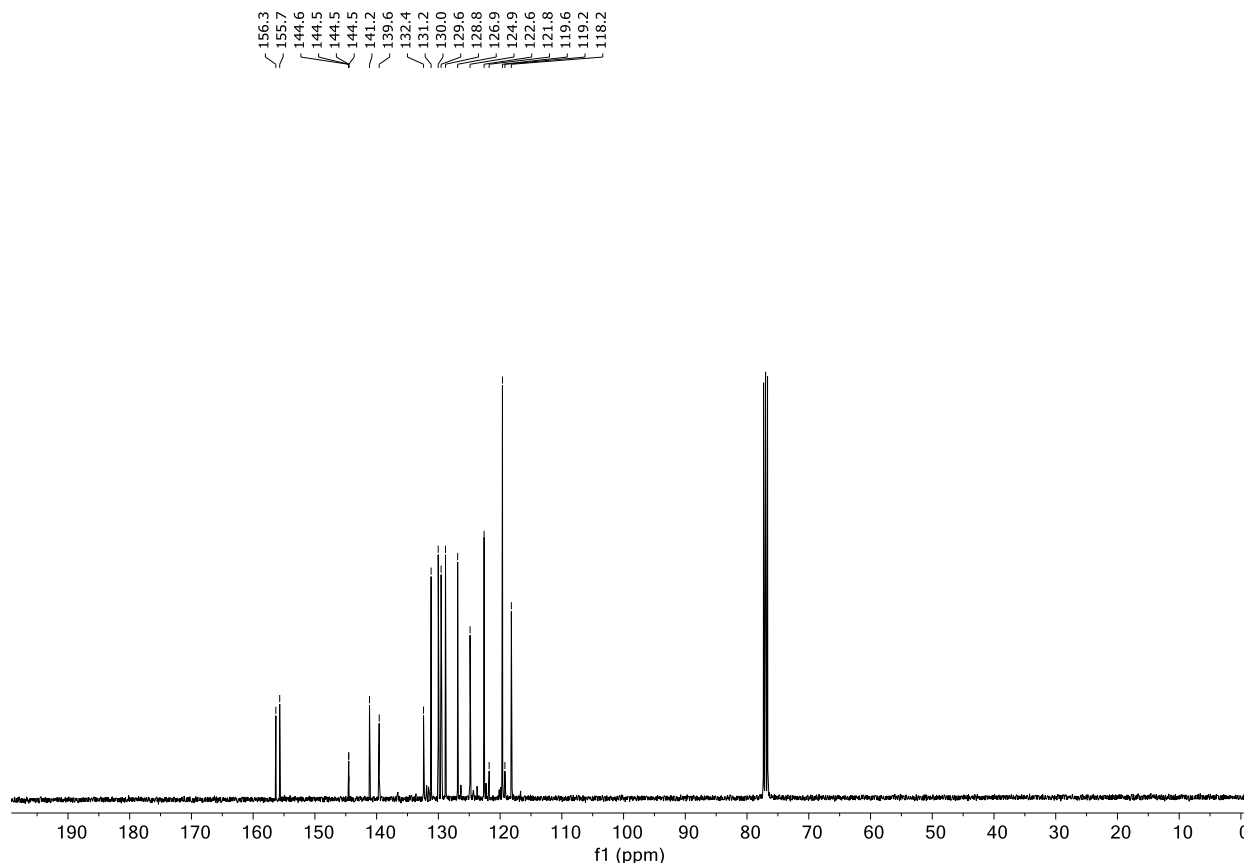

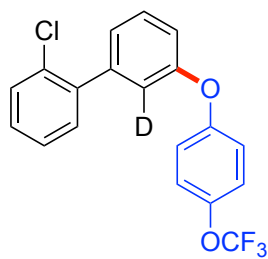

Chemical Formula: C<sub>19</sub>H<sub>11</sub>DCIF<sub>3</sub>O<sub>2</sub>  
 Exact Mass: 365,0535

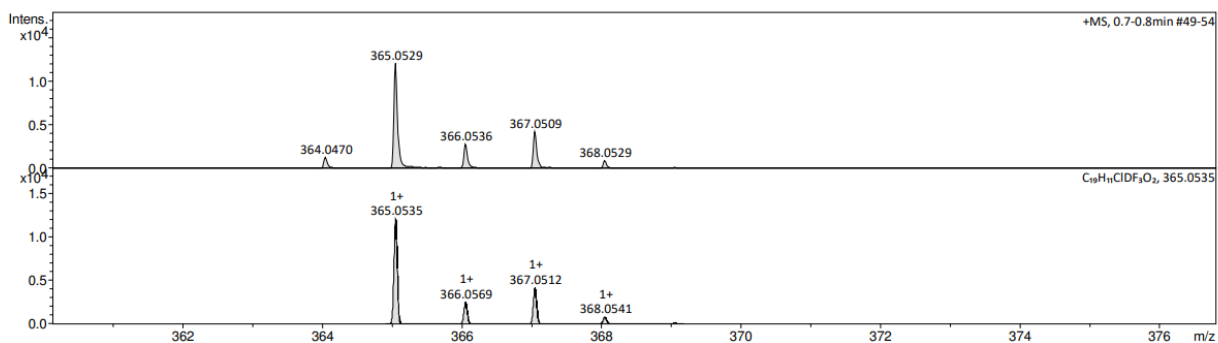

| Meas. m/z | # | Ion Formula                                                      | m/z      | err [ppm] | mSigma | # mSigma | Score  | rdb  | e <sup>-</sup> Conf | N-Rule |
|-----------|---|------------------------------------------------------------------|----------|-----------|--------|----------|--------|------|---------------------|--------|
| 365.0529  | 1 | C <sub>19</sub> H <sub>11</sub> ClDF <sub>3</sub> O <sub>2</sub> | 365.0535 | 1.8       | 13.3   | 1        | 100.00 | 12.0 | odd                 | ok     |

## Deuterated solvent: Metal-free CDC C-C bond formation with cyclic diaryl $\lambda^3$ -chloranes

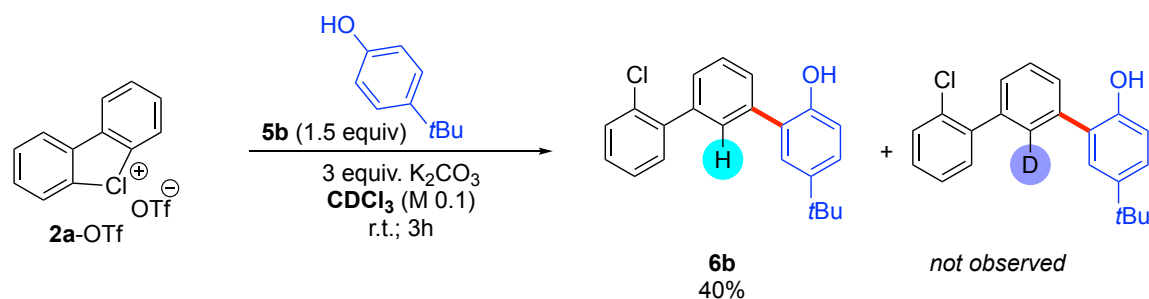

SCHEME S-17

To a dry and metal-free vial was charged **2a-OTf** (50.5 mg, 0.15 mmol, 1 equiv.) and  $K_2CO_3$  (62 mg, 0.45 mmol, 3 equiv) and 4-*t*-Butylphenol **5b** (34.5 mg, 0.22 mmol, 1.5 equiv). The vial was evacuated and back filled with Argon three times. Subsequently,  $CDCl_3$  (1.5 mL, 0.1M) was added. The resulting heterogeneous mixture was stirred at room temperature for 3 hours. The conversion was verified by GCMS and TLC. The mixture was diluted with EtOAc (3 mL) and filtered. After removal of volatile components, the crude was purified through Prep-TLC yielding **6b** as colorless oil in 40% (20 mg, 0.06 mmol). No deuteration has been observed. **HRMS (APCI)**:  $m/z$   $[M]^+$  calcd for  $C_{22}H_{21}ClO^+$ : 336.1275; found: 336.1282.

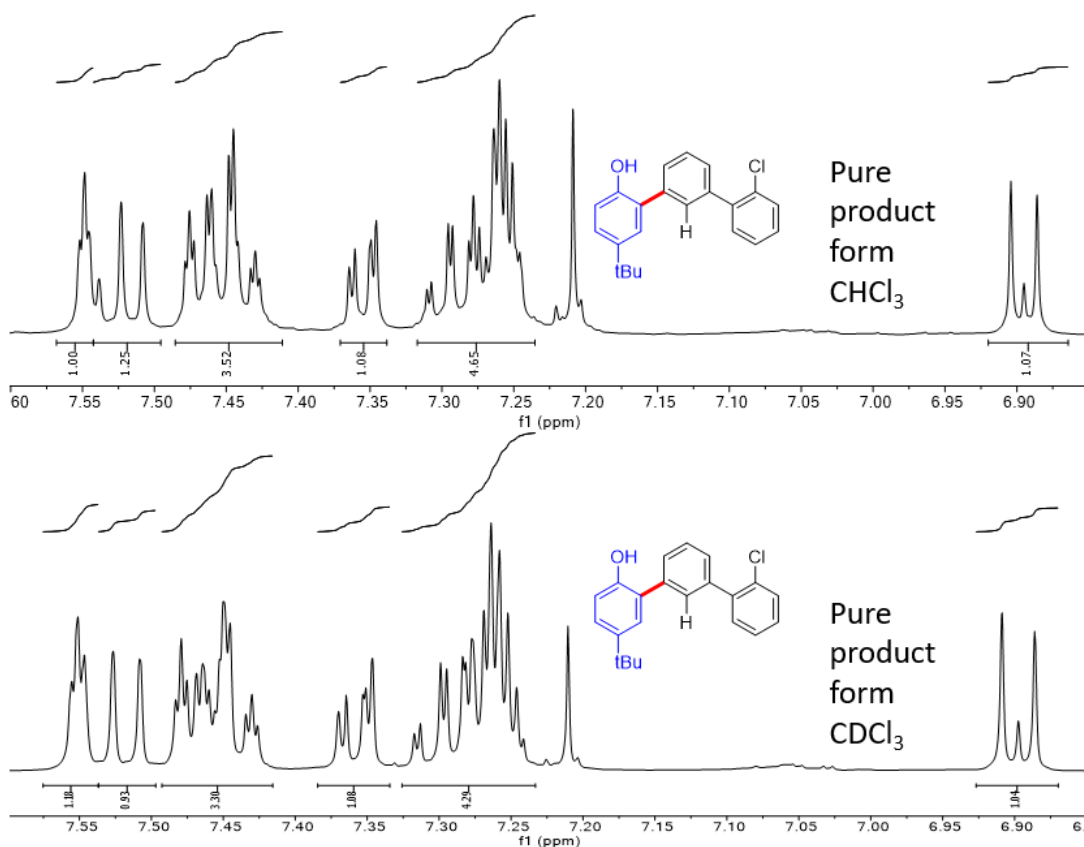



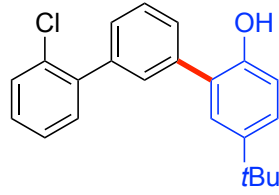

Chemical Formula: C<sub>22</sub>H<sub>21</sub>ClO  
 Exact Mass: 336,1275

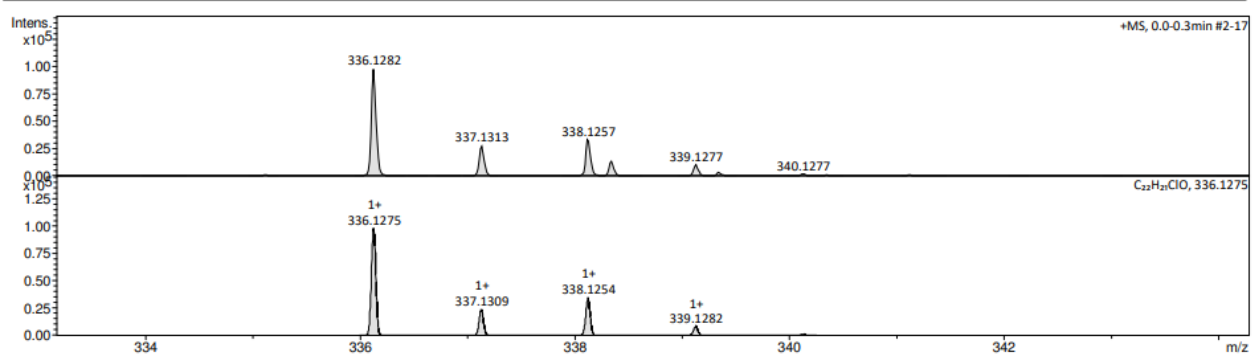

| Meas. m/z | # | Ion Formula                         | m/z      | err [ppm] | mSigma | # mSigma | Score  | rdb  | e <sup>-</sup> | Conf | N-Rule |
|-----------|---|-------------------------------------|----------|-----------|--------|----------|--------|------|----------------|------|--------|
| 336.1282  | 1 | C <sub>22</sub> H <sub>21</sub> ClO | 336.1275 | -1.8      | 20.0   | 1        | 100.00 | 12.0 |                | odd  | ok     |

## Deuterated Substrate:

### Metal free C-O arylation of phenols with cyclic diaryl $\lambda^3$ -chloranes

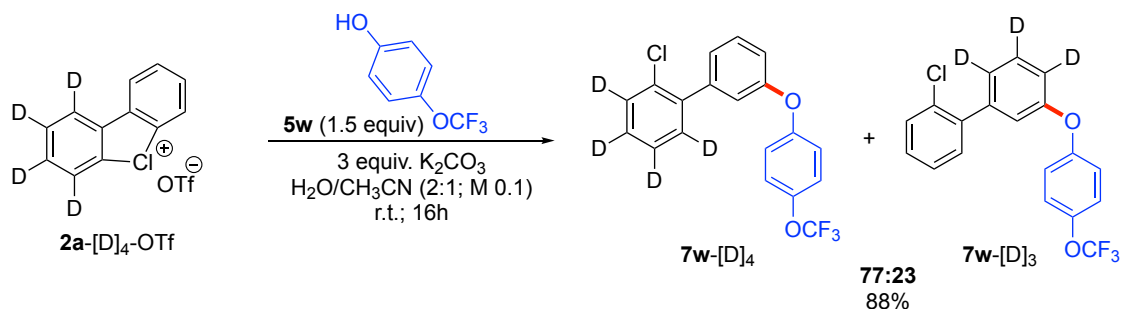

SCHEME S-18

To a dry and metal-free vial was charged **2a**-[D]<sub>4</sub>-OTf (51 mg, 0.15 mmol, 1 equiv.) and  $K_2CO_3$  (62 mg, 0.45 mmol, 3 equiv). The vial was evacuated and back filled with Argon three times. Subsequently, under argon, 4-trifluoromethoxy phenol **5w** (29  $\mu$ L, 0.23 mmol, 1.5 equiv) was added followed by  $H_2O$  (1 mL) and  $CH_3CN$  (0.5 mL). The conversion was verified by GCMS and TLC. The mixture was extracted with EtOAc (3 mL x 3 times). The extracts were combined, dried over  $MgSO_4$ , and filtered. After removal of volatile components, the crude was purified through Prep-TLC (Cy:EtOAc 9:1) yielding **7w**-[D]<sub>4</sub> and **5w**-[D]<sub>3</sub> as colorless oil in 88% yield. (48.7 mg, 0.13 mmol). The ratio has been determined by <sup>1</sup>H NMR which resulted to be 77:23 **7w**-[D]<sub>4</sub> and **7w**-[D]<sub>3</sub>. HRMS (APCI):  $m/z$  [M]<sup>+</sup> calcd for  $C_{19}H_8ClD_4F_3O_2^+$ : 368.0724; found: 368.0734.

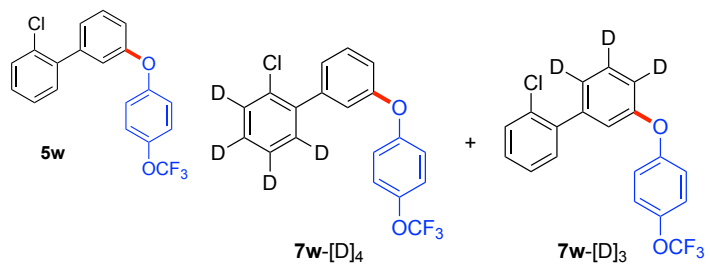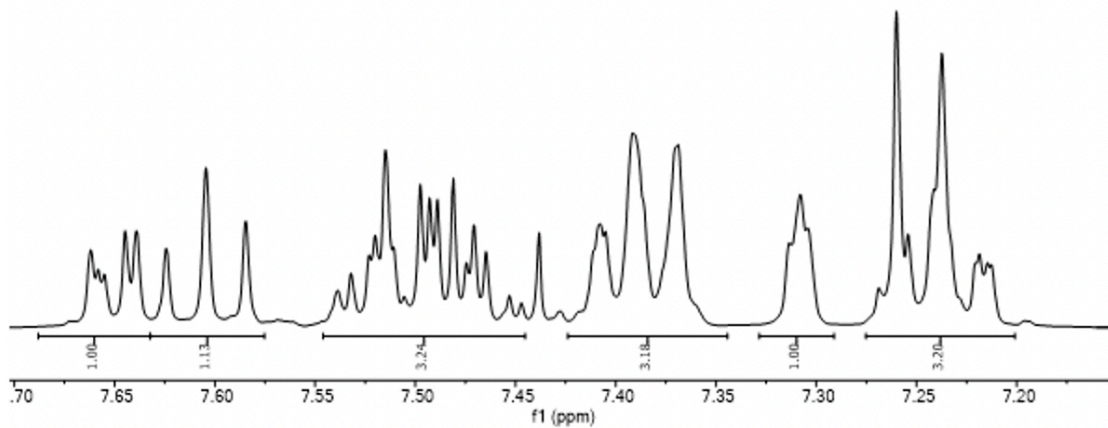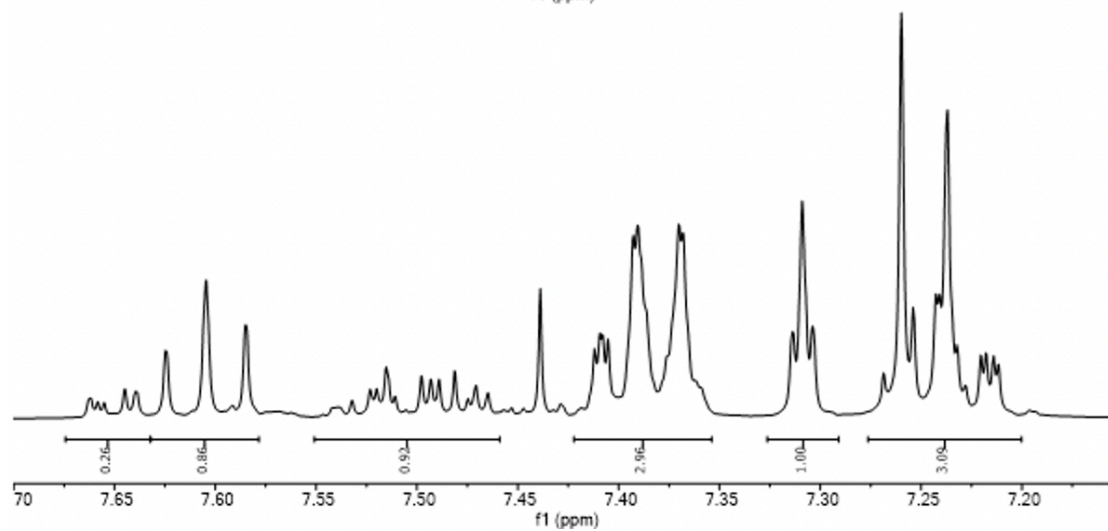

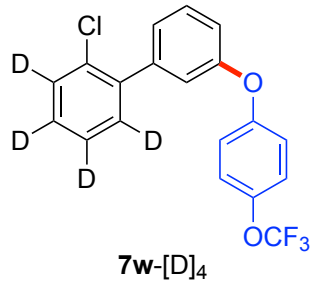

Chemical Formula: C<sub>19</sub>H<sub>8</sub>D<sub>4</sub>ClF<sub>3</sub>O<sub>2</sub>  
 Exact Mass: 368.0729

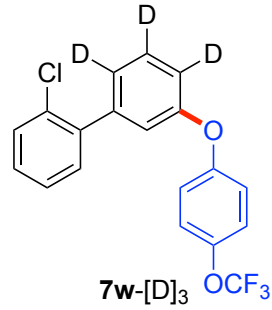

Chemical Formula: C<sub>19</sub>H<sub>9</sub>D<sub>3</sub>ClF<sub>3</sub>O<sub>2</sub>  
 Exact Mass: 367.0666

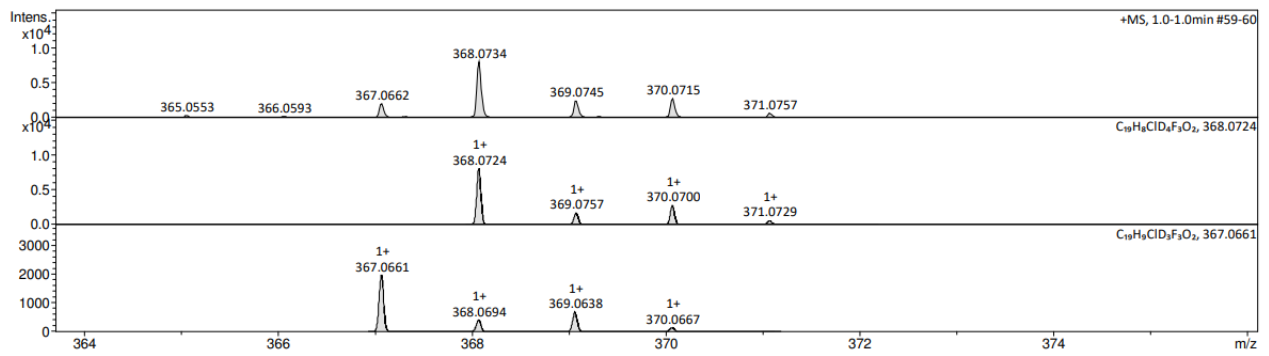

| Meas. m/z | # | Ion Formula                                                                   | m/z      | err [ppm] | mSigma | # mSigma | Score  | rdB  | e <sup>-</sup> Conf | N-Rule |
|-----------|---|-------------------------------------------------------------------------------|----------|-----------|--------|----------|--------|------|---------------------|--------|
| 367.0662  | 1 | C <sub>19</sub> H <sub>9</sub> ClD <sub>3</sub> F <sub>3</sub> O <sub>2</sub> | 367.0661 | -0.3      | 589.8  | 1        | 100.00 | 12.0 | odd                 | ok     |
| 368.0734  | 1 | C <sub>19</sub> H <sub>8</sub> ClD <sub>4</sub> F <sub>3</sub> O <sub>2</sub> | 368.0724 | -2.8      | 45.3   | 1        | 100.00 | 12.0 | odd                 | ok     |

## Metal-free CDC C-C bond formation with cyclic diaryl $\lambda^3$ -chloranes

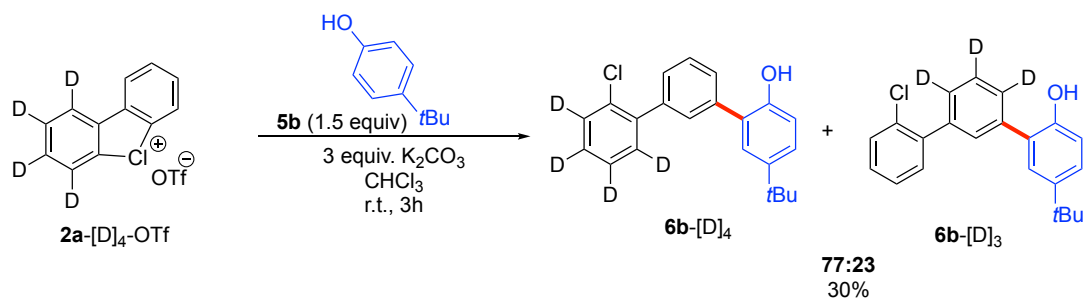

SCHEME S-19

To a dry and metal-free vial was charged **2a**-[D]<sub>4</sub>-OTf (51 mg, 0.15 mmol, 1 equiv.), K<sub>2</sub>CO<sub>3</sub> (62 mg, 0.45 mmol, 3 equiv.) and 4-*t*-Butylphenol **5b** (34 mg, 0.23 mmol, 1.5 equiv.). The vial was evacuated and back refilled with Argon three times. Subsequently, under argon, CHCl<sub>3</sub> (1.5 mL) was added. The reaction was stirred for 3h at r.t. The conversion was verified by GCMS and TLC. The mixture was filtered and after removal of volatile components, the crude was purified through Prep-TLC (Cy:EtOAc 9:1) yielding **6b**-[D]<sub>4</sub> and **6b**-[D]<sub>3</sub> as colorless oil in 30% yield. (15.7 mg, 0.046 mmol) The ratio has been determined by <sup>1</sup>H NMR which resulted to be 77:23 **6b**-[D]<sub>4</sub> and **6b**-[D]<sub>3</sub>. **HRMS (APCI)**: m/z [M]<sup>+</sup> calcd for C<sub>22</sub>H<sub>17</sub>ClD<sub>4</sub>O<sup>+</sup>: 340.1527; found: 340.1539.

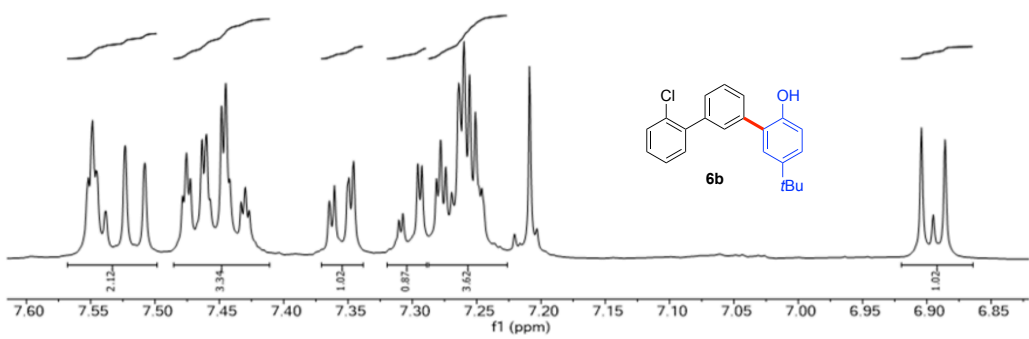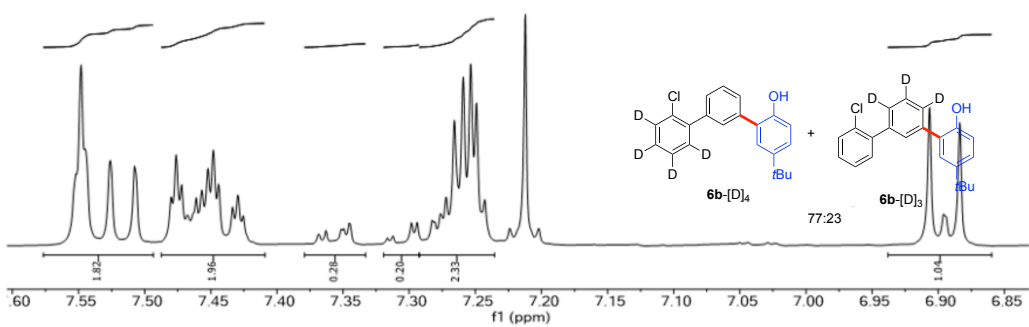

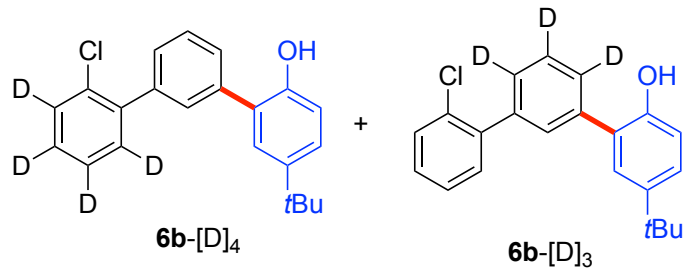

Chemical Formula:  $\text{C}_{22}\text{H}_{17}\text{D}_4\text{ClO}$   
 Exact Mass: 340.1532

Chemical Formula:  $\text{C}_{22}\text{H}_{18}\text{D}_3\text{ClO}$   
 Exact Mass: 339.1469

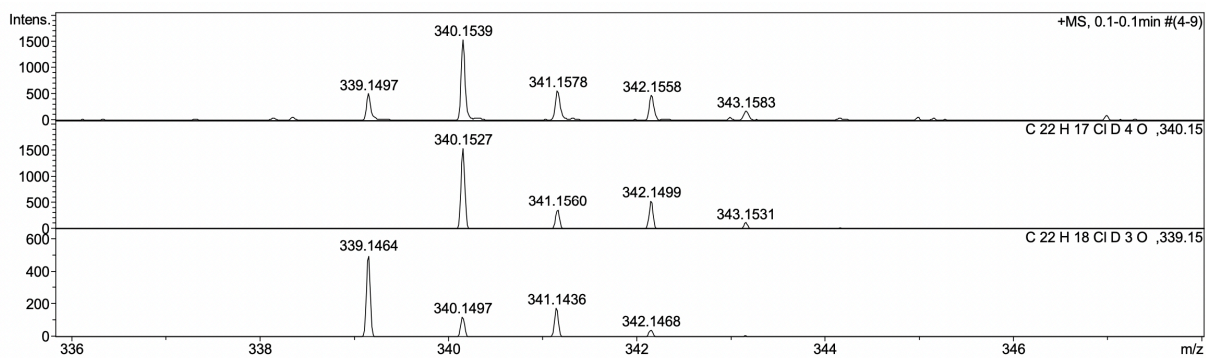

## Kinetic Studies:

### Metal-free CDC C-C bond formation with cyclic diaryl $\lambda^3$ -chloranes

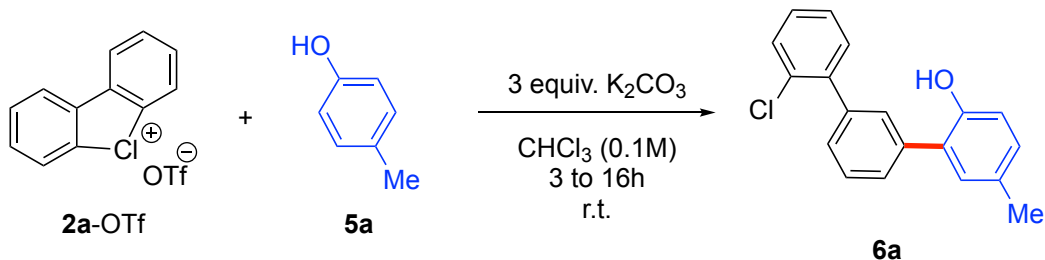

SCHEME S-20

To a dry and metal-free vial was charged **2a-OTf** (101 mg, 0.3 mmol, 1 equiv.) and  $K_2CO_3$  (124 mg, 0.9 mmol, 3 equiv) and 4-MethylPhenol **5a** (49 mg, 0.45 mmol, 1.5 equiv.). The vial was evacuated and back refilled with Argon three times. Subsequently,  $CHCl_3$  (3 mL, 0.1 M) was added. The resulting heterogeneous mixture was stirred at room temperature. Samples (100  $\mu$ L) was taken over the time, a solution (500  $\mu$ L, 0.02 M) of internal standard in  $CDCl_3$  (67.3 mg of 1,3,5-Trimethoxybenzene in 20 mL of  $CDCl_3$ ) was added, then  $^1H$ NMR was recorded. The experiment was replicated three times.

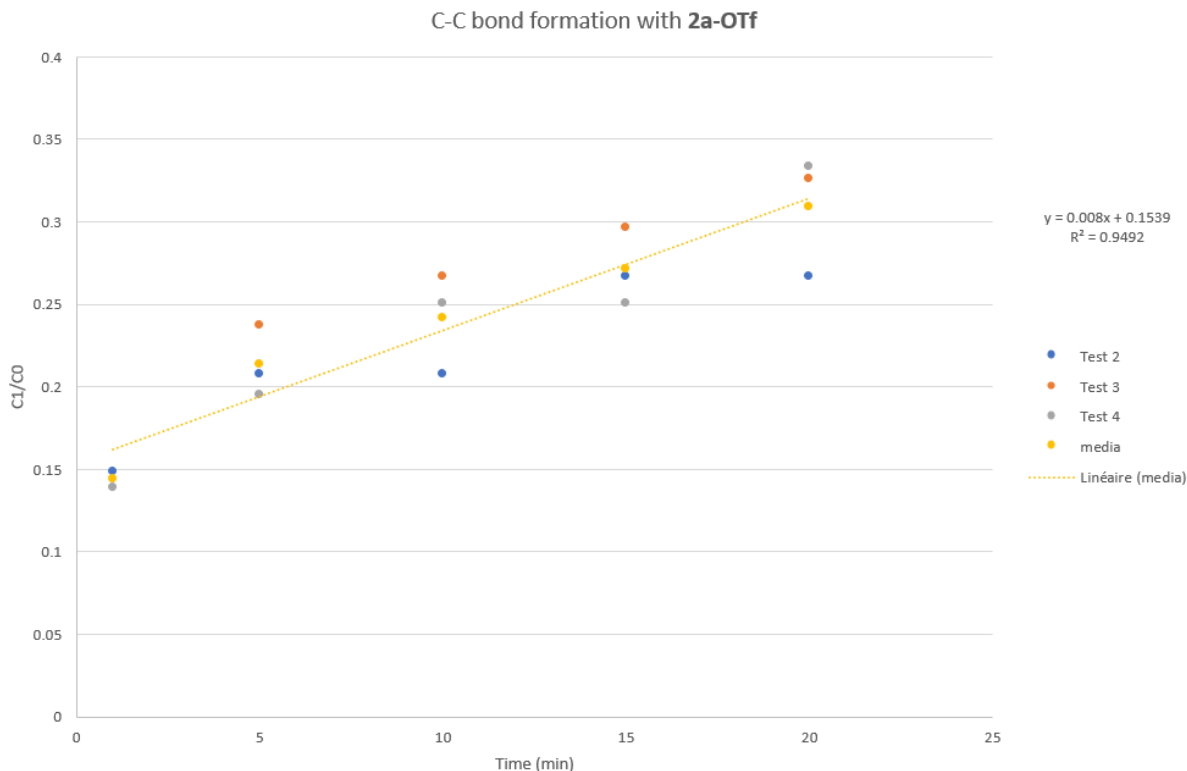

FIGURE S-1



## Metal free C-O arylation of phenols with cyclic diaryl $\lambda^3$ -chloranes

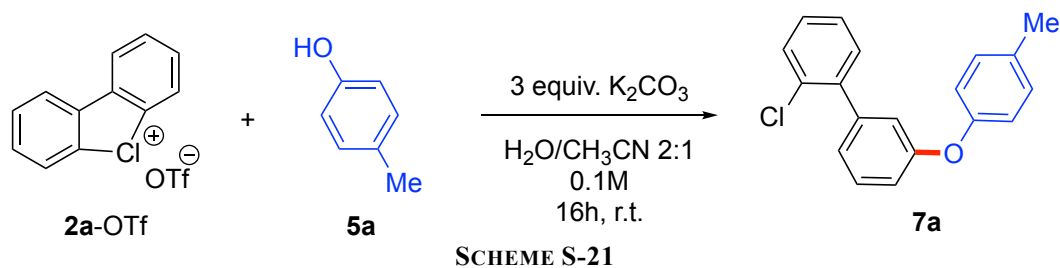

To a dry and metal-free vial was charged **2a-OTf** (101 mg, 0.3 mmol, 1 equiv.) and  $\text{K}_2\text{CO}_3$  (124 mg, 0.9 mmol, 3 equiv) and 4-methylphenol **5a** (49 mg, 0.45 mmol, 1.5 equiv.). The vial was evacuated and back refilled with Argon three times. Subsequently,  $\text{CH}_3\text{CN}/\text{H}_2\text{O}$  (0.5 mL and 1 mL respectively, 0.1 M) was added. The resulting heterogeneous mixture was stirred at room temperature. Samples (100  $\mu\text{L}$ ) was taken over the time, a solution (500  $\mu\text{L}$ , 0.02 M) of internal standard in  $\text{CDCl}_3$  (67.3 mg of 1,3,5-Trimethoxybenzene in 20 mL of  $\text{CDCl}_3$ ) was added, then  $^1\text{H NMR}$  was recorded. The experiment was replicated three times.

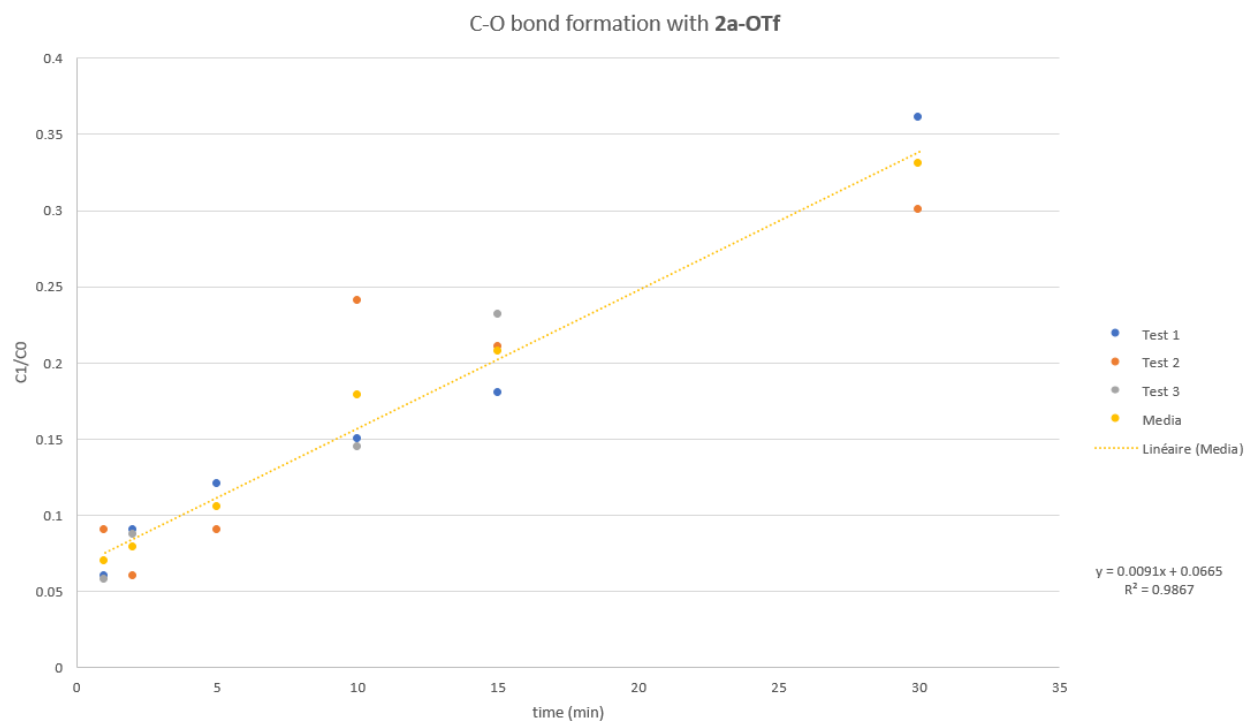

**FIGURE S-2**

## Computational Data

All density functional theory (DFT) calculations were performed with the Gaussian 16, Rev. A.03, program package.<sup>4</sup> Geometry optimizations were performed at the  $\omega$ B97X-D level of theory.<sup>5</sup> All atoms were described with a def2-TZVP basis set<sup>6</sup> in combination with SDD pseudopotential<sup>7,8</sup> for Br and I. Analytical frequency calculations were performed at the same level of theory to characterize all stationary points as intermediates (no imaginary frequencies) or transition states (exactly one imaginary frequency). Intrinsic reaction coordinate (IRC) calculations were performed at the same level of theory to confirm the intermediates linked by each transition state. The electronic energy was refined through single point calculations at the  $\omega$ B97X-D level of theory, employing a def2-QZVPP basis set<sup>6</sup> in combination with SDD pseudopotential for Br and I. Unless stated otherwise, solvent effects were taken into consideration in single-point calculations through the use of the SMD solvation model (solvent = chloroform) to model CHCl<sub>3</sub>.<sup>9</sup> *GoodVibes*<sup>10</sup> (v. 3.0.2) with quasi-harmonic entropy<sup>11</sup> and enthalpy<sup>12</sup> treatment (frequency cut-off value: 100 cm<sup>-1</sup>) was used to obtain corrected Gibbs free energies and enthalpies at 298 K and 1 atm.

NBO charges were calculated with *Natural Atomic Orbitals and Natural Bond Orbitals Analysis* (NBO 7.0) software.<sup>13</sup>

3D-visualizations of optimized structures were rendered with *CYLview20*.<sup>14</sup>

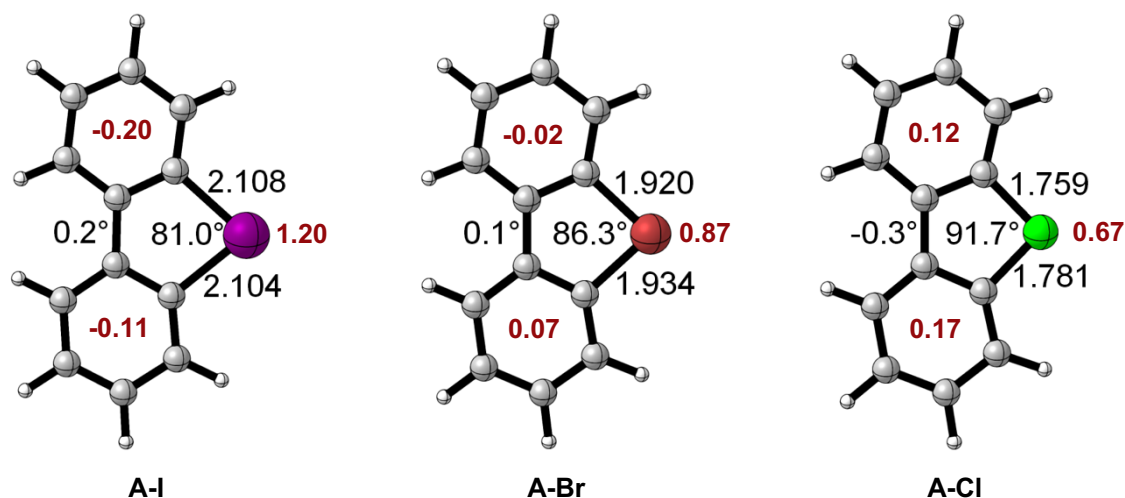

**Figure S-3.** Calculated geometries of hypervalent halonium species A (**2a**, **3a** and **4a**). Distances are given in Å and OTf was omitted for clarity. Values in red correspond to NBO charges.

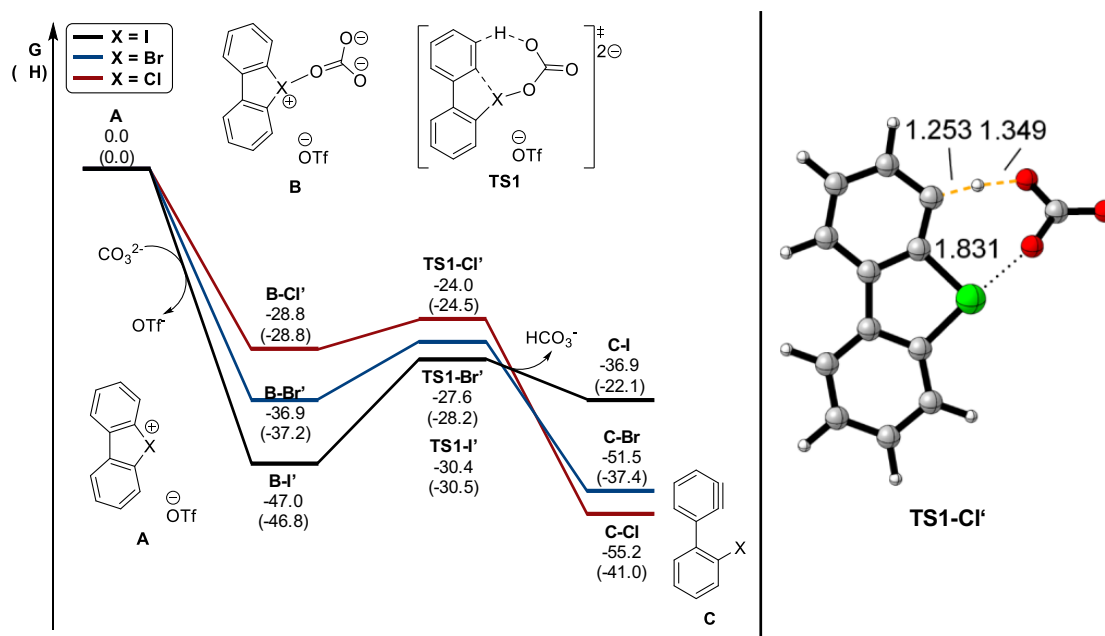

**Figure S-4.** Calculated energy diagram (in kcal mol<sup>-1</sup>) for the formation of arynes **C** from hypervalent halonium **2a**, **3a** and **4a** in the absence of OTf. Distances are given in Å.

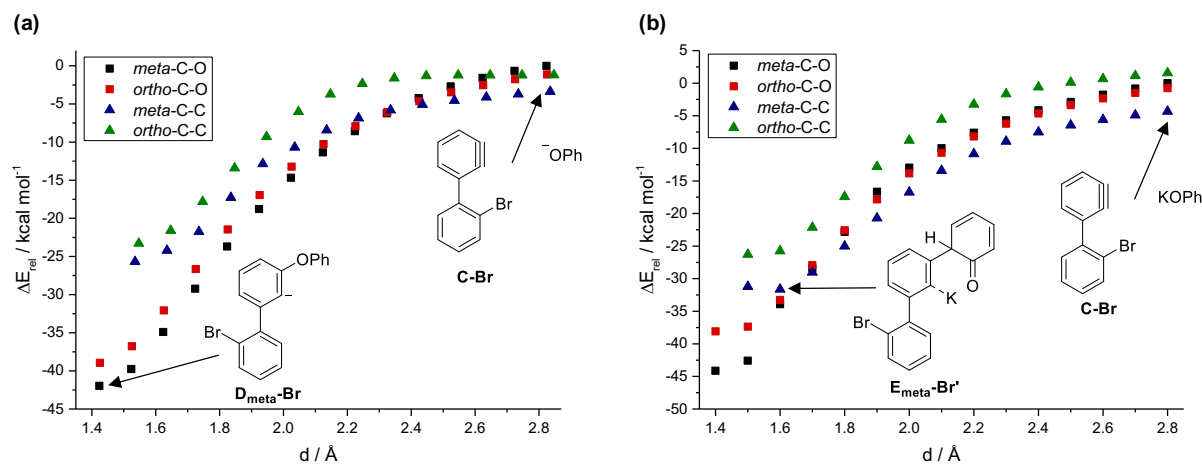

**Figure S-5.** Calculated energy profile (in kcal mol<sup>-1</sup>) for C–O bond (black and red squares) and C–C bond (blue and green triangles) formation with bromine-substituted aryne and (a) phenolate and (b) potassium phenolate.

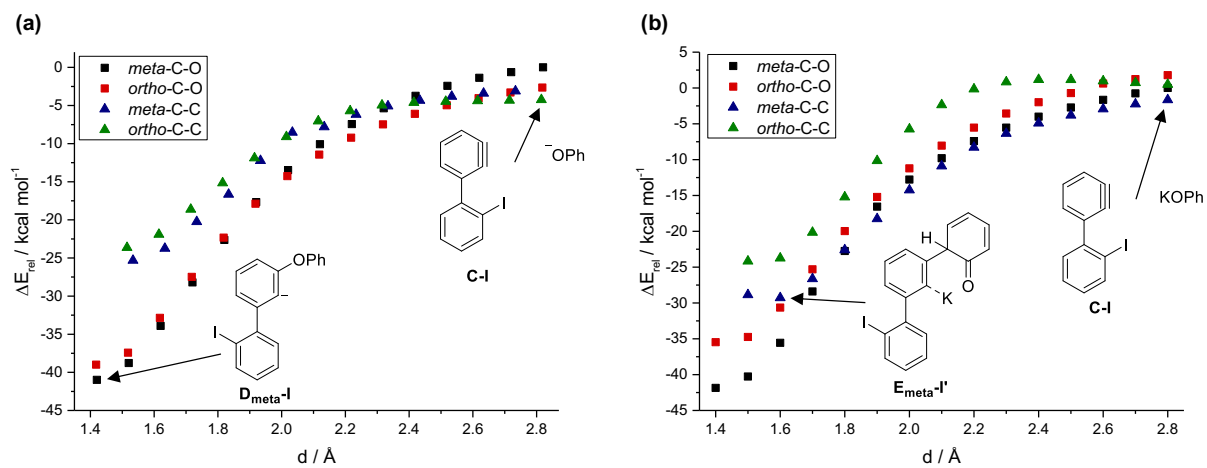

**Figure S-6.** Calculated energy profile (in kcal mol<sup>-1</sup>) for C–O bond (black and red squares) and C–C bond (blue and green triangles) formation with iodine-substituted aryne and (a) phenolate and (b) potassium phenolate.

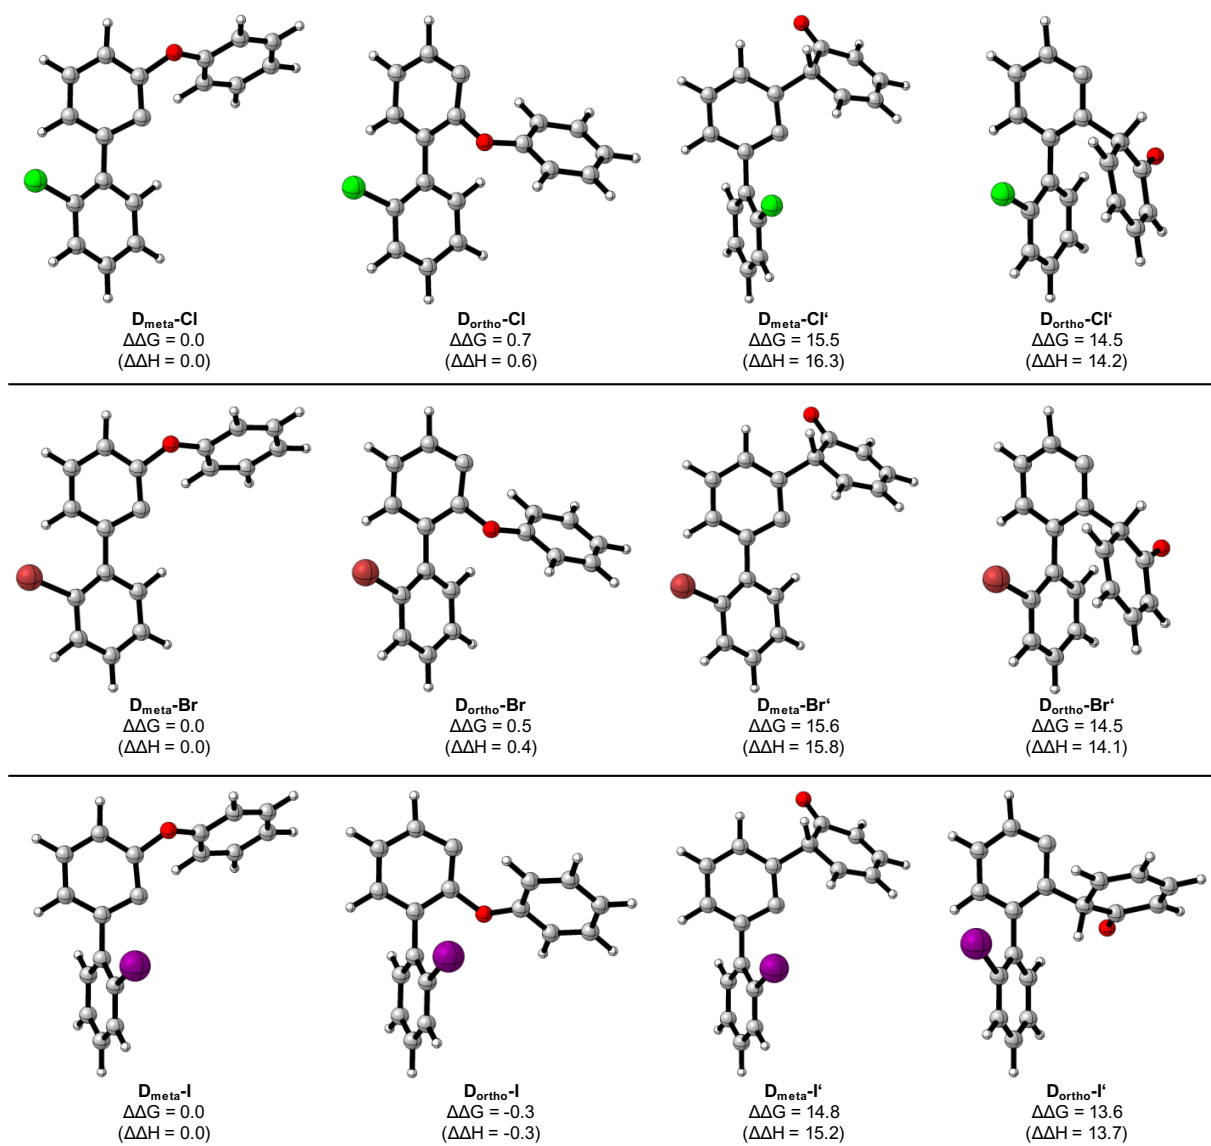

**Figure S-7.** Optimized geometries of C–O and C–C intermediates and energies relative to **D<sub>meta</sub>** (in kcal mol<sup>-1</sup>).

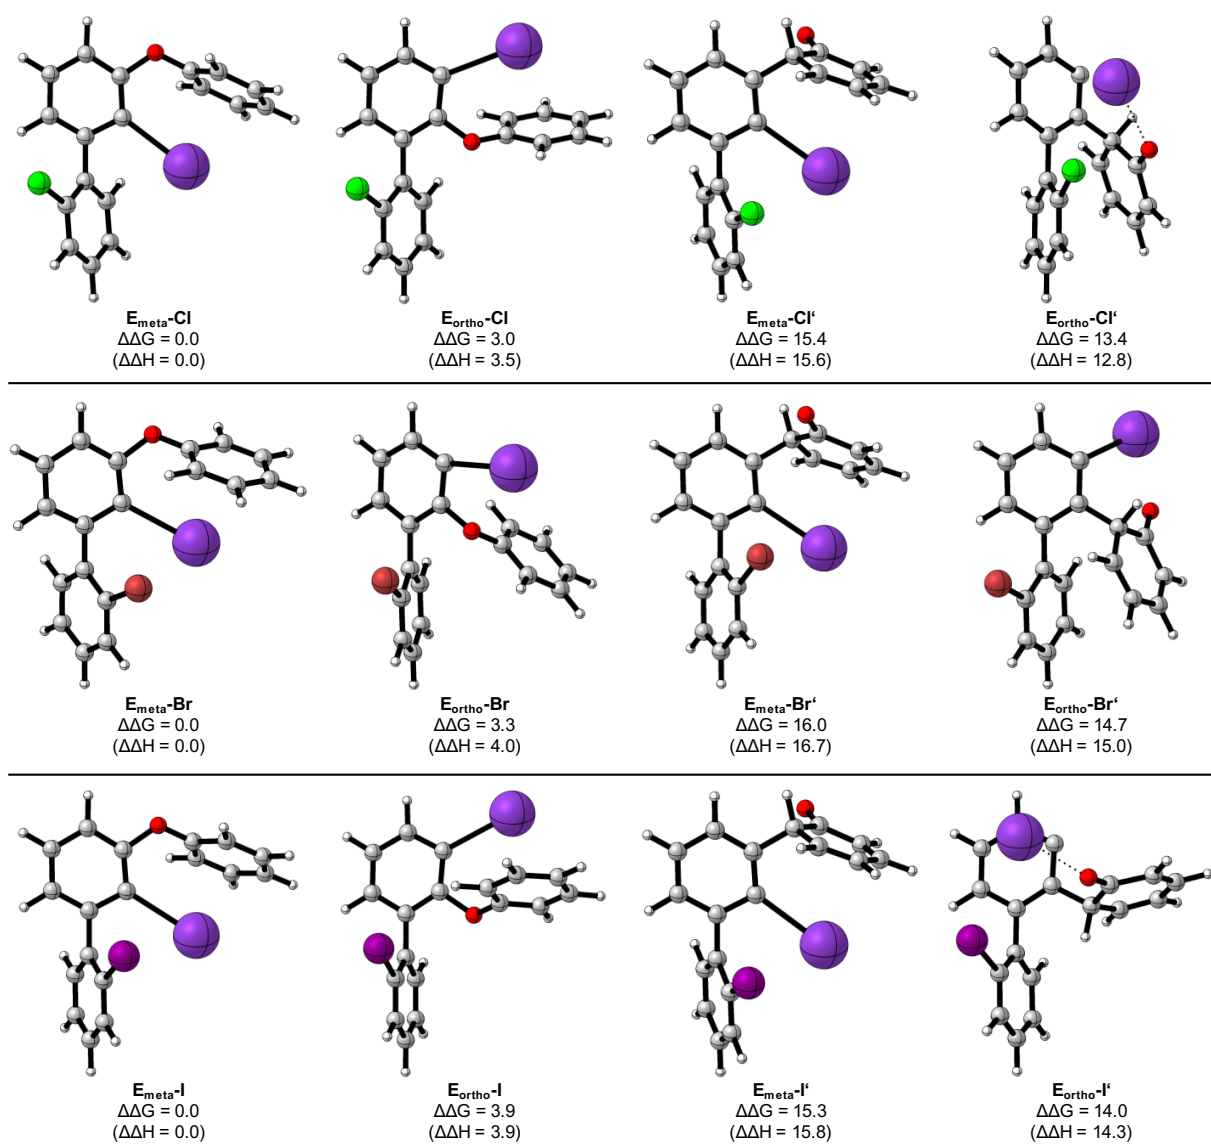

**Figure S-8.** Optimized geometries of C–O and C–C intermediates and energies relative to **E<sub>meta</sub>** (in kcal mol<sup>-1</sup>).

## Summary of Energies

| Structure                     | E_SPC (au)   | qh-H_SPC (au) | T.qh-S (au) | qh-G(T)_SPC (au) | im. freq (cm <sup>-1</sup> ) |
|-------------------------------|--------------|---------------|-------------|------------------|------------------------------|
| <b>Figure S-1</b>             |              |               |             |                  |                              |
| A-I                           | -1435.122635 | -1434.914348  | 0.065458    | -1434.979806     | --                           |
| A-Br                          | -1437.102785 | -1436.894782  | 0.065578    | -1436.960360     | --                           |
| A-Cl                          | -1883.927110 | -1883.718912  | 0.064304    | -1883.783216     | --                           |
| B-I                           | -1699.199483 | -1698.973802  | 0.078187    | -1699.051989     | --                           |
| B-Br                          | -1701.167849 | -1700.942224  | 0.077014    | -1701.019238     | --                           |
| B-Cl                          | -2147.980254 | -2147.754480  | 0.076196    | -2147.830675     | --                           |
| TS1-I                         | -1699.168627 | -1698.948784  | 0.077382    | -1699.026166     | -962.20                      |
| TS1-Br                        | -1701.147795 | -1700.927837  | 0.076491    | -1701.004328     | -1093.07                     |
| TS1-Cl                        | -2147.969198 | -2147.748308  | 0.075497    | -2147.823805     | -460.21                      |
| C-I                           | -472.790492  | -472.632873   | 0.048780    | -472.681653      | --                           |
| C-Br                          | -474.795424  | -474.637619   | 0.047906    | -474.685525      | --                           |
| C-Cl                          | -921.625570  | -921.467451   | 0.046771    | -921.514222      | --                           |
| CO <sub>3</sub> <sup>2-</sup> | -264.005957  | -263.987791   | 0.029664    | -264.017455      | --                           |
| HCO <sub>3</sub> <sup>-</sup> | -264.579846  | -264.548667   | 0.030166    | -264.578833      | --                           |
| OTf <sup>-</sup>              | -961.791521  | -961.755854   | 0.039721    | -961.795574      | --                           |
| <b>Figure S-2</b>             |              |               |             |                  |                              |
| B-I'                          | -737.411538  | -737.220853   | 0.055782    | -737.276635      | --                           |
| B-Br'                         | -739.376583  | -739.186070   | 0.055048    | -739.241118      | --                           |
| B-Cl'                         | -1186.187385 | -1185.996765  | 0.054315    | -1186.051080     | --                           |
| TS1-I'                        | -737.379683  | -737.194858   | 0.055223    | -737.250081      | -909.35                      |
| TS1-Br'                       | -739.356569  | -739.171676   | 0.054558    | -739.226234      | -1115.15                     |
| TS1-Cl'                       | -1186.175424 | -1185.989835  | 0.053562    | -1186.043398     | -799.71                      |
| <b>Figure S-5</b>             |              |               |             |                  |                              |
| D <sub>meta</sub> -Cl         | -1228.696181 | -1228.438350  | 0.059112    | -1228.497462     | --                           |

|                              |              |              |          |              |    |
|------------------------------|--------------|--------------|----------|--------------|----|
| <b>D<sub>ortho</sub>-Cl</b>  | -1228.695131 | -1228.437369 | 0.058953 | -1228.496322 | -- |
| <b>D<sub>meta</sub>-Cl'</b>  | -1228.669230 | -1228.412439 | 0.060332 | -1228.472771 | -- |
| <b>D<sub>ortho</sub>-Cl'</b> | -1228.672858 | -1228.415655 | 0.058748 | -1228.474403 | -- |
| <b>D<sub>meta</sub>-Br</b>   | -781.865704  | -781.608451  | 0.060363 | -781.668814  | -- |
| <b>D<sub>ortho</sub>-Br</b>  | -781.865066  | -781.607810  | 0.060232 | -781.668042  | -- |
| <b>D<sub>meta</sub>-Br'</b>  | -781.840359  | -781.583275  | 0.060609 | -781.643884  | -- |
| <b>D<sub>ortho</sub>-Br'</b> | -781.842702  | -781.585927  | 0.059761 | -781.645688  | -- |
| <b>D<sub>meta</sub>-I</b>    | -779.859592  | -779.602556  | 0.061164 | -779.663720  | -- |
| <b>D<sub>ortho</sub>-I</b>   | -779.860084  | -779.603082  | 0.061075 | -779.664157  | -- |
| <b>D<sub>meta</sub>-I'</b>   | -779.834883  | -779.578323  | 0.061764 | -779.640087  | -- |
| <b>D<sub>ortho</sub>-I'</b>  | -779.837031  | -779.580652  | 0.061389 | -779.642041  | -- |
| <b>PhO<sup>-</sup></b>       | -307.003778  | -306.906607  | 0.035041 | -306.941648  | -- |

**Figure S-6**

|                              |              |              |          |              |    |
|------------------------------|--------------|--------------|----------|--------------|----|
| <b>E<sub>meta</sub>-Cl</b>   | -1828.604745 | -1828.343397 | 0.063680 | -1828.407077 | -- |
| <b>E<sub>ortho</sub>-Cl</b>  | -1828.599311 | -1828.337893 | 0.064333 | -1828.402227 | -- |
| <b>E<sub>meta</sub>-Cl'</b>  | -1828.579216 | -1828.318497 | 0.064091 | -1828.382588 | -- |
| <b>E<sub>ortho</sub>-Cl'</b> | -1828.584125 | -1828.323027 | 0.062646 | -1828.385673 | -- |
| <b>E<sub>meta</sub>-Br</b>   | -1381.776519 | -1381.515317 | 0.063925 | -1381.579242 | -- |
| <b>E<sub>ortho</sub>-Br</b>  | -1381.770072 | -1381.509019 | 0.065003 | -1381.574021 | -- |
| <b>E<sub>meta</sub>-Br'</b>  | -1381.748984 | -1381.488642 | 0.065141 | -1381.553784 | -- |
| <b>E<sub>ortho</sub>-Br'</b> | -1381.751745 | -1381.491380 | 0.064434 | -1381.555813 | -- |
| <b>E<sub>meta</sub>-I</b>    | -1379.772375 | -1379.511554 | 0.065127 | -1379.576681 | -- |
| <b>E<sub>ortho</sub>-I</b>   | -1379.766343 | -1379.505272 | 0.065211 | -1379.570482 | -- |
| <b>E<sub>meta</sub>-I'</b>   | -1379.746591 | -1379.486412 | 0.065870 | -1379.552281 | -- |
| <b>E<sub>ortho</sub>-I'</b>  | -1379.749194 | -1379.488777 | 0.065536 | -1379.554313 | -- |
| <b>KOPh</b>                  | -906.904773  | -906.804209  | 0.040682 | -906.844891  | -- |



## Cartesian Coordinates of Optimized Structures

### A-I

|   |          |           |           |
|---|----------|-----------|-----------|
| C | 4.058158 | 8.995946  | 4.508179  |
| C | 3.302435 | 7.852534  | 4.324647  |
| H | 2.806035 | 7.366240  | 5.154495  |
| C | 3.189522 | 7.333797  | 3.045787  |
| H | 2.602979 | 6.440017  | 2.879276  |
| C | 3.827049 | 7.959148  | 1.980789  |
| H | 3.734890 | 7.548710  | 0.983875  |
| C | 4.578782 | 9.101673  | 2.181096  |
| H | 5.067365 | 9.574089  | 1.339186  |
| C | 4.706802 | 9.642365  | 3.459185  |
| C | 5.471009 | 10.844304 | 3.803953  |
| C | 6.184926 | 11.632629 | 2.902894  |
| H | 6.202481 | 11.368490 | 1.853910  |
| C | 6.870534 | 12.750476 | 3.339135  |
| H | 7.419384 | 13.351179 | 2.625839  |
| C | 6.860828 | 13.109283 | 4.680904  |
| H | 7.399362 | 13.985975 | 5.015025  |
| C | 6.162516 | 12.350502 | 5.606394  |
| H | 6.140747 | 12.611411 | 6.654028  |
| C | 5.489298 | 11.241081 | 5.139376  |
| C | 3.078390 | 12.482232 | 9.479584  |
| O | 5.094273 | 11.475074 | 8.205541  |
| O | 5.137618 | 11.365659 | 10.640502 |
| O | 3.622219 | 9.933830  | 9.325844  |
| S | 4.370405 | 11.159448 | 9.459777  |
| I | 4.363316 | 9.950596  | 6.362241  |
| F | 2.330072 | 12.415109 | 8.371606  |
| F | 3.634753 | 13.689130 | 9.525324  |
| F | 2.279252 | 12.343373 | 10.529113 |

### A-Br

|   |           |           |           |
|---|-----------|-----------|-----------|
| C | -1.890678 | -1.091783 | -0.398157 |
| C | -2.309008 | -2.403452 | -0.326204 |
| C | -3.568414 | -2.695901 | -0.825138 |
| C | -4.360787 | -1.692446 | -1.372907 |
| C | -3.912205 | -0.385554 | -1.433121 |
| C | -2.651061 | -0.065303 | -0.938801 |
| C | -2.005540 | 1.241263  | -0.914262 |
| C | -2.518439 | 2.448231  | -1.381612 |
| C | -1.765551 | 3.603413  | -1.278643 |
| C | -0.497497 | 3.580617  | -0.709942 |
| C | 0.047864  | 2.398225  | -0.232275 |
| C | -0.733625 | 1.276358  | -0.360032 |

|    |           |           |           |
|----|-----------|-----------|-----------|
| Br | -0.179320 | -0.482737 | 0.222695  |
| O  | 1.956163  | 0.450621  | 1.022472  |
| S  | 3.065857  | 0.301249  | 0.059571  |
| O  | 4.084103  | 1.293607  | 0.194358  |
| O  | 2.593119  | -0.007196 | -1.264911 |
| C  | 3.840854  | -1.275276 | 0.636393  |
| F  | 2.932975  | -2.265763 | 0.622188  |
| F  | 4.300155  | -1.165459 | 1.878690  |
| F  | 4.845544  | -1.630952 | -0.154949 |
| H  | 1.029230  | 2.352121  | 0.215818  |
| H  | 0.082382  | 4.490585  | -0.636162 |
| H  | -2.169610 | 4.537073  | -1.646810 |
| H  | -3.504644 | 2.477579  | -1.825903 |
| H  | -4.538372 | 0.384495  | -1.864278 |
| H  | -5.341111 | -1.937891 | -1.759140 |
| H  | -3.932589 | -3.713788 | -0.787621 |
| H  | -1.684737 | -3.178695 | 0.097264  |

### A-Cl

|    |          |          |           |
|----|----------|----------|-----------|
| C  | 6.432980 | 3.286546 | 8.260948  |
| C  | 5.801963 | 2.061818 | 8.119228  |
| C  | 6.567410 | 1.000026 | 7.649967  |
| C  | 7.902822 | 1.206304 | 7.351557  |
| C  | 8.493873 | 2.456099 | 7.513859  |
| C  | 7.756774 | 3.533641 | 7.980368  |
| C  | 4.401249 | 2.106275 | 8.503298  |
| C  | 3.983691 | 3.355593 | 8.934618  |
| C  | 2.721393 | 3.688214 | 9.350753  |
| C  | 1.799832 | 2.651412 | 9.331194  |
| C  | 2.159422 | 1.374165 | 8.912809  |
| C  | 3.449063 | 1.093155 | 8.497652  |
| Cl | 5.335780 | 4.514047 | 8.880799  |
| O  | 3.877906 | 6.422217 | 9.881400  |
| S  | 4.160971 | 6.394234 | 11.319649 |
| O  | 4.417354 | 5.054561 | 11.797705 |
| C  | 2.514038 | 6.813928 | 12.050815 |
| F  | 2.108314 | 8.022644 | 11.672130 |
| F  | 1.581420 | 5.930286 | 11.652344 |
| F  | 2.556991 | 6.783157 | 13.378600 |
| O  | 5.034210 | 7.428461 | 11.782671 |
| H  | 2.483733 | 4.690645 | 9.673640  |
| H  | 0.788066 | 2.850500 | 9.657029  |
| H  | 1.418187 | 0.586133 | 8.913374  |
| H  | 3.719854 | 0.096915 | 8.173838  |
| H  | 6.120944 | 0.022694 | 7.523235  |

|   |          |          |          |
|---|----------|----------|----------|
| H | 8.499889 | 0.380716 | 6.988038 |
| H | 9.540343 | 2.593790 | 7.278316 |
| H | 8.200932 | 4.509432 | 8.119166 |

**B-I**

|   |           |           |           |
|---|-----------|-----------|-----------|
| C | 3.092750  | 1.318749  | 0.030782  |
| C | 4.201744  | 2.142093  | 0.149015  |
| H | 5.181229  | 1.690910  | 0.221886  |
| C | 4.019568  | 3.516197  | 0.169919  |
| H | 4.880932  | 4.167339  | 0.262014  |
| C | 2.742087  | 4.053899  | 0.073446  |
| H | 2.601001  | 5.128661  | 0.089996  |
| C | 1.644587  | 3.221414  | -0.044081 |
| H | 0.652899  | 3.649599  | -0.118771 |
| C | 1.798380  | 1.833705  | -0.067867 |
| C | 0.689920  | 0.875573  | -0.190058 |
| C | -0.659785 | 1.218858  | -0.300428 |
| H | -0.968681 | 2.257790  | -0.300905 |
| C | -1.624868 | 0.233983  | -0.411861 |
| H | -2.673773 | 0.494517  | -0.500963 |
| C | -1.244508 | -1.105072 | -0.412923 |
| H | -2.012546 | -1.864244 | -0.500845 |
| C | 0.094973  | -1.450145 | -0.303286 |
| H | 0.376974  | -2.499060 | -0.305833 |
| C | 1.067245  | -0.463965 | -0.191965 |
| C | -6.569757 | -0.221035 | 0.923749  |
| O | -5.000356 | -1.376952 | -0.778100 |
| O | -6.990271 | -0.242657 | -1.627608 |
| O | -5.107188 | 1.060907  | -0.780789 |
| S | -5.824973 | -0.192701 | -0.777634 |
| I | 3.245910  | -0.803015 | -0.012486 |
| F | -5.635415 | -0.176370 | 1.882481  |
| F | -7.295290 | -1.331632 | 1.134817  |
| F | -7.391139 | 0.822403  | 1.128731  |
| C | 5.958015  | -1.655980 | 0.197019  |
| O | 5.354652  | -0.418757 | 0.178179  |
| O | 7.185056  | -1.681329 | 0.300771  |
| O | 5.150507  | -2.631764 | 0.102624  |

**B-Br**

|   |           |           |           |
|---|-----------|-----------|-----------|
| C | -2.755137 | -0.923509 | -0.237909 |
| C | -4.086008 | -0.557856 | -0.159873 |
| C | -4.380546 | 0.797439  | -0.122614 |
| C | -3.366223 | 1.749012  | -0.162556 |
| C | -2.040142 | 1.362936  | -0.241049 |
| C | -1.719424 | 0.005946  | -0.280235 |
| C | -0.373182 | -0.557062 | -0.362134 |

|    |           |           |           |
|----|-----------|-----------|-----------|
| C  | 0.823784  | 0.154741  | -0.421029 |
| C  | 2.016843  | -0.543736 | -0.494504 |
| C  | 2.019436  | -1.936245 | -0.508511 |
| C  | 0.826105  | -2.645435 | -0.451733 |
| C  | -0.366078 | -1.945913 | -0.378791 |
| Br | -2.199076 | -2.784129 | -0.295057 |
| O  | 3.074784  | 2.935429  | -0.613630 |
| S  | 2.160335  | 4.015256  | -0.328806 |
| O  | 0.758274  | 3.666878  | -0.390355 |
| O  | 2.505733  | 5.294040  | -0.899277 |
| C  | 2.420671  | 4.295326  | 1.487429  |
| F  | 3.691099  | 4.635271  | 1.761944  |
| F  | 2.143394  | 3.200980  | 2.206060  |
| F  | 1.644016  | 5.283861  | 1.957588  |
| H  | 0.829332  | -3.730286 | -0.464674 |
| H  | 2.961030  | -2.471919 | -0.565543 |
| H  | 2.942723  | 0.016018  | -0.540405 |
| H  | 0.839059  | 1.238946  | -0.416593 |
| H  | -1.250324 | 2.105702  | -0.270545 |
| H  | -3.610796 | 2.804187  | -0.131749 |
| H  | -5.416175 | 1.111291  | -0.061009 |
| H  | -4.842776 | -1.329177 | -0.130677 |
| C  | -4.164996 | -4.709838 | -0.226130 |
| O  | -4.199379 | -3.343641 | -0.201949 |
| O  | -5.248894 | -5.305061 | -0.181272 |
| O  | -3.002806 | -5.222615 | -0.293249 |

**B-Cl**

|    |           |           |           |
|----|-----------|-----------|-----------|
| C  | -0.420265 | -1.850791 | -0.381071 |
| C  | -0.351315 | -0.469513 | -0.367859 |
| C  | 0.886415  | 0.164568  | -0.433140 |
| C  | 2.024911  | -0.620510 | -0.509131 |
| C  | 1.936062  | -2.012241 | -0.519332 |
| C  | 0.702637  | -2.648359 | -0.456146 |
| C  | -1.682150 | 0.112351  | -0.280982 |
| C  | -2.693935 | -0.840762 | -0.236308 |
| C  | -4.033931 | -0.518681 | -0.152658 |
| C  | -4.351825 | 0.831688  | -0.112726 |
| C  | -3.361462 | 1.810015  | -0.155047 |
| C  | -2.025060 | 1.461621  | -0.239181 |
| Cl | -2.119309 | -2.526652 | -0.295314 |
| O  | -4.069724 | -3.227759 | -0.199121 |
| C  | -3.922536 | -4.578535 | -0.233616 |
| O  | -2.729751 | -5.015368 | -0.307905 |
| O  | -4.959970 | -5.263338 | -0.189901 |
| O  | 0.753589  | 3.666941  | -0.400852 |
| S  | 2.152308  | 4.027167  | -0.323390 |

|   |           |           |           |
|---|-----------|-----------|-----------|
| C | 2.386497  | 4.320006  | 1.494108  |
| F | 1.596677  | 5.305497  | 1.947442  |
| O | 3.076486  | 2.950654  | -0.589656 |
| O | 2.495435  | 5.304024  | -0.898342 |
| F | 3.650592  | 4.669945  | 1.783000  |
| F | 2.106849  | 3.227536  | 2.214849  |
| H | 0.610626  | -3.728079 | -0.464521 |
| H | 2.841010  | -2.606570 | -0.578542 |
| H | 2.988937  | -0.130073 | -0.559819 |
| H | 0.968188  | 1.245652  | -0.432119 |
| H | -1.247547 | 2.217569  | -0.270897 |
| H | -3.635707 | 2.857718  | -0.121457 |
| H | -5.393692 | 1.122571  | -0.046702 |
| H | -4.760262 | -1.319956 | -0.122679 |

**TS1-I**

|   |           |           |           |
|---|-----------|-----------|-----------|
| C | 3.133899  | 1.073843  | 0.103680  |
| C | 4.388664  | 1.599635  | 0.177718  |
| H | 5.526185  | 0.744811  | -0.027296 |
| C | 4.395225  | 2.999512  | 0.220308  |
| H | 5.346651  | 3.523714  | 0.274759  |
| C | 3.223298  | 3.748982  | 0.183202  |
| H | 3.269026  | 4.833362  | 0.222308  |
| C | 1.987087  | 3.130000  | 0.073171  |
| H | 1.082658  | 3.723739  | 0.020679  |
| C | 1.910880  | 1.738336  | 0.018334  |
| C | 0.676701  | 0.959243  | -0.150325 |
| C | -0.606933 | 1.497622  | -0.264302 |
| H | -0.750637 | 2.570699  | -0.219680 |
| C | -1.705633 | 0.674223  | -0.437865 |
| H | -2.704294 | 1.086737  | -0.529565 |
| C | -1.539252 | -0.705995 | -0.499249 |
| H | -2.413973 | -1.330354 | -0.638121 |
| C | -0.270255 | -1.253263 | -0.384454 |
| H | -0.144580 | -2.330106 | -0.428645 |
| C | 0.828505  | -0.424093 | -0.210924 |
| C | -6.363699 | -0.232342 | 0.945889  |
| O | -4.957324 | -1.219033 | -0.987120 |
| O | -7.073092 | -0.132908 | -1.540718 |
| O | -5.160305 | 1.208787  | -0.832402 |
| S | -5.822666 | -0.074864 | -0.823222 |
| I | 2.859882  | -1.072324 | 0.047231  |
| F | -5.325916 | -0.200142 | 1.791368  |
| F | -7.016776 | -1.384468 | 1.168725  |
| F | -7.194398 | 0.760071  | 1.305327  |
| C | 6.193621  | -1.195149 | 0.044241  |
| O | 5.003523  | -1.463989 | 0.567644  |

|   |          |           |           |
|---|----------|-----------|-----------|
| O | 7.048366 | -2.071565 | -0.058580 |
| O | 6.410649 | 0.042274  | -0.326126 |

**TS1-Br**

|    |           |           |           |
|----|-----------|-----------|-----------|
| C  | 1.122707  | -0.487167 | -0.204586 |
| C  | 0.933461  | 0.886785  | -0.147435 |
| C  | -0.360069 | 1.394110  | -0.266004 |
| C  | -1.431108 | 0.534034  | -0.438706 |
| C  | -1.221461 | -0.841666 | -0.493345 |
| C  | 0.060812  | -1.359018 | -0.373515 |
| C  | 2.171072  | 1.643359  | 0.019498  |
| C  | 3.351067  | 0.913438  | 0.096533  |
| C  | 4.631547  | 1.364395  | 0.165405  |
| C  | 4.714523  | 2.760794  | 0.210935  |
| C  | 3.585873  | 3.575381  | 0.182341  |
| C  | 2.315661  | 3.027873  | 0.077044  |
| Br | 2.987493  | -1.041276 | 0.041015  |
| O  | 4.992448  | -1.658066 | 0.560416  |
| C  | 6.217558  | -1.500112 | 0.072406  |
| O  | 6.554818  | -0.297295 | -0.306674 |
| O  | 6.991780  | -2.459861 | 0.010861  |
| O  | -4.625246 | -1.214990 | -0.978815 |
| S  | -5.499739 | -0.076996 | -0.819993 |
| O  | -4.844696 | 1.210843  | -0.829517 |
| C  | -6.044759 | -0.234168 | 0.947687  |
| F  | -6.882643 | 0.753695  | 1.302366  |
| F  | -5.009036 | -0.192985 | 1.795440  |
| F  | -6.690454 | -1.389912 | 1.171111  |
| O  | -6.746827 | -0.144191 | -1.541802 |
| H  | 5.648038  | 0.522654  | -0.003847 |
| H  | 5.695272  | 3.226144  | 0.261041  |
| H  | 3.695099  | 4.654610  | 0.223576  |
| H  | 1.440458  | 3.664675  | 0.029722  |
| H  | -0.530026 | 2.463773  | -0.225422 |
| H  | -2.441645 | 0.915253  | -0.536144 |
| H  | -2.078588 | -1.489651 | -0.631139 |
| H  | 0.224585  | -2.430196 | -0.412447 |

**TS1-Cl**

|   |          |           |           |
|---|----------|-----------|-----------|
| C | 3.566892 | 0.742465  | 0.069398  |
| C | 2.441581 | 1.554869  | 0.011241  |
| C | 2.657476 | 2.926682  | 0.090927  |
| C | 3.957691 | 3.395047  | 0.204732  |
| C | 5.034807 | 2.513330  | 0.221148  |
| C | 4.871719 | 1.127508  | 0.153302  |
| C | 1.190642 | 0.833746  | -0.159257 |
| C | 1.398294 | -0.532537 | -0.223735 |

|    |           |           |           |
|----|-----------|-----------|-----------|
| C  | 0.370550  | -1.439331 | -0.391631 |
| C  | -0.919746 | -0.940948 | -0.508148 |
| C  | -1.159015 | 0.431155  | -0.449640 |
| C  | -0.110141 | 1.318131  | -0.275109 |
| Cl | 3.111040  | -1.016060 | -0.015511 |
| O  | -4.287866 | -1.226379 | -0.980080 |
| S  | -5.159803 | -0.087688 | -0.809947 |
| O  | -4.500166 | 1.198432  | -0.823502 |
| C  | -5.685674 | -0.246781 | 0.962896  |
| F  | -6.330989 | -1.401123 | 1.191046  |
| F  | -4.639430 | -0.209344 | 1.798006  |
| F  | -6.516423 | 0.742697  | 1.328192  |
| O  | -6.413176 | -0.149990 | -1.519978 |
| H  | 0.568056  | -2.503652 | -0.432021 |
| H  | -1.764853 | -1.603900 | -0.646138 |
| H  | -2.177909 | 0.789729  | -0.546923 |
| H  | -0.300992 | 2.383884  | -0.231076 |
| H  | 1.817391  | 3.609731  | 0.057352  |
| H  | 4.133349  | 4.464032  | 0.264750  |
| H  | 6.043032  | 2.910773  | 0.283281  |
| H  | 5.791287  | 0.325741  | 0.033790  |
| C  | 6.326540  | -1.770959 | 0.119995  |
| O  | 5.053156  | -1.827709 | 0.495607  |
| O  | 7.022290  | -2.800172 | 0.149524  |
| O  | 6.787942  | -0.614010 | -0.251326 |

### C-I

|   |           |           |           |
|---|-----------|-----------|-----------|
| C | -2.271299 | -2.821139 | 0.064547  |
| C | -2.269297 | -1.452470 | -0.137940 |
| C | -1.075447 | -0.744372 | -0.139846 |
| C | 0.145774  | -1.393986 | 0.058984  |
| C | 0.110654  | -2.774684 | 0.274508  |
| C | -1.074011 | -3.484563 | 0.275668  |
| H | -1.061843 | -4.552338 | 0.451188  |
| H | 1.040001  | -3.293083 | 0.470744  |
| C | 1.450710  | -0.709815 | 0.066033  |
| C | 1.742162  | 0.563939  | 0.504956  |
| C | 2.830363  | 1.149566  | 0.561847  |
| C | 4.047351  | 0.627025  | 0.177578  |
| C | 3.889773  | -0.674352 | -0.317584 |
| C | 2.648477  | -1.312706 | -0.372148 |
| H | 2.603538  | -2.311723 | -0.789253 |
| H | 4.761496  | -1.206268 | -0.680571 |
| H | 5.009166  | 1.118288  | 0.222954  |
| I | -1.214670 | 1.337493  | -0.466283 |
| H | -3.202442 | -0.930771 | -0.298389 |
| H | -3.209107 | -3.361324 | 0.064780  |

### C-Br

|    |           |           |           |
|----|-----------|-----------|-----------|
| C  | 2.998332  | 1.783574  | 0.024643  |
| C  | 2.647618  | 0.458978  | -0.166281 |
| C  | 1.313261  | 0.084393  | -0.148741 |
| C  | 0.296322  | 1.019580  | 0.054794  |
| C  | 0.684007  | 2.346869  | 0.256860  |
| C  | 2.010767  | 2.731188  | 0.240324  |
| H  | 2.273040  | 3.767886  | 0.405835  |
| H  | -0.080722 | 3.086140  | 0.456020  |
| C  | -1.135058 | 0.675272  | 0.077540  |
| C  | -1.724790 | -0.490175 | 0.515055  |
| C  | -2.919598 | -0.801333 | 0.580385  |
| C  | -3.977243 | 0.002492  | 0.207257  |
| C  | -3.514224 | 1.231622  | -0.280916 |
| C  | -2.155971 | 1.552775  | -0.344889 |
| H  | -1.875146 | 2.514161  | -0.758414 |
| H  | -4.234838 | 1.960746  | -0.632593 |
| H  | -5.028767 | -0.243395 | 0.256035  |
| Br | 0.932684  | -1.764130 | -0.430493 |
| H  | 3.409148  | -0.290061 | -0.332273 |
| H  | 4.042278  | 2.068526  | 0.011506  |

### C-Cl

|    |           |           |           |
|----|-----------|-----------|-----------|
| C  | -3.362599 | -0.811872 | 0.008970  |
| C  | -2.804109 | 0.436887  | -0.195041 |
| C  | -1.426985 | 0.593595  | -0.169716 |
| C  | -0.574328 | -0.490326 | 0.054821  |
| C  | -1.169347 | -1.735719 | 0.267342  |
| C  | -2.540746 | -1.902924 | 0.243290  |
| H  | -2.967231 | -2.881958 | 0.417605  |
| H  | -0.533254 | -2.584997 | 0.480139  |
| C  | 0.892540  | -0.368644 | 0.085040  |
| C  | 1.652279  | 0.692340  | 0.527779  |
| C  | 2.880450  | 0.811307  | 0.594799  |
| C  | 3.805293  | -0.141537 | 0.221769  |
| C  | 3.158940  | -1.284547 | -0.267927 |
| C  | 1.767494  | -1.392568 | -0.335421 |
| H  | 1.342094  | -2.298789 | -0.750344 |
| H  | 3.759581  | -2.115959 | -0.617980 |
| H  | 4.881814  | -0.059265 | 0.272440  |
| Cl | -0.799448 | 2.188699  | -0.444783 |
| H  | -3.429564 | 1.299826  | -0.377557 |
| H  | -4.438423 | -0.927218 | -0.009791 |

### CO<sub>3</sub><sup>2-</sup>

|   |          |          |          |
|---|----------|----------|----------|
| C | 0.000009 | 0.000003 | 0.000125 |
|---|----------|----------|----------|

|   |           |           |           |
|---|-----------|-----------|-----------|
| O | -0.995874 | 0.832869  | -0.000045 |
| O | 1.219227  | 0.446021  | -0.000045 |
| O | -0.223359 | -1.278891 | -0.000045 |

**HCO<sup>3-</sup>**

|   |           |           |           |
|---|-----------|-----------|-----------|
| C | -0.124479 | -0.037190 | -0.000072 |
| O | -0.071437 | -1.281977 | 0.000027  |
| O | -1.069186 | 0.749436  | 0.000023  |
| O | 1.163076  | 0.586309  | 0.000023  |
| H | 1.749826  | -0.173706 | 0.000037  |

**OTf**

|   |           |           |           |
|---|-----------|-----------|-----------|
| C | 0.906231  | -0.000024 | 0.000001  |
| F | 1.409876  | -1.000466 | 0.740004  |
| F | 1.409851  | 1.141091  | 0.496411  |
| F | 1.409900  | -0.140604 | -1.236431 |
| S | -0.951324 | -0.000013 | 0.000007  |
| O | -1.262323 | 1.133138  | -0.838212 |
| O | -1.262280 | -1.292494 | -0.562206 |
| O | -1.262224 | 0.159343  | 1.400457  |

**B-I<sup>c</sup>**

|   |           |           |           |
|---|-----------|-----------|-----------|
| C | 0.138539  | 1.260587  | -0.000013 |
| C | -0.603155 | 2.432451  | -0.000005 |
| H | -1.681982 | 2.369758  | -0.000009 |
| C | 0.059120  | 3.649738  | 0.000006  |
| H | -0.514989 | 4.568324  | 0.000013  |
| C | 1.447420  | 3.693091  | 0.000008  |
| H | 1.962427  | 4.646472  | 0.000017  |
| C | 2.176645  | 2.518935  | -0.000001 |
| H | 3.258725  | 2.563921  | -0.000001 |
| C | 1.534672  | 1.279677  | -0.000012 |
| C | 2.231374  | -0.016175 | -0.000024 |
| C | 3.617207  | -0.179968 | -0.000034 |
| H | 4.276804  | 0.679901  | -0.000034 |
| C | 4.163664  | -1.451276 | -0.000047 |
| H | 5.240091  | -1.575445 | -0.000054 |
| C | 3.333808  | -2.567397 | -0.000050 |
| H | 3.765248  | -3.561989 | -0.000059 |
| C | 1.956731  | -2.403759 | -0.000042 |
| H | 1.317680  | -3.281790 | -0.000046 |
| C | 1.398231  | -1.132491 | -0.000030 |
| I | -0.782326 | -0.662326 | -0.000023 |
| C | -3.585020 | -0.514936 | -0.000029 |
| O | -2.589575 | 0.446781  | -0.000044 |
| O | -4.744905 | -0.122005 | -0.000029 |
| O | -3.137289 | -1.705210 | -0.000017 |

**B-Br<sup>c</sup>**

|    |           |           |           |
|----|-----------|-----------|-----------|
| C  | -0.015164 | 1.183437  | -0.000102 |
| C  | -0.808808 | 2.316941  | -0.000067 |
| C  | -0.183022 | 3.554386  | -0.000027 |
| C  | 1.203905  | 3.648835  | -0.000022 |
| C  | 1.979301  | 2.503880  | -0.000060 |
| C  | 1.376334  | 1.247265  | -0.000102 |
| C  | 2.064008  | -0.044082 | -0.000154 |
| C  | 3.440547  | -0.261737 | -0.000166 |
| C  | 3.924233  | -1.558878 | -0.000222 |
| C  | 3.043953  | -2.637373 | -0.000265 |
| C  | 1.673388  | -2.420879 | -0.000251 |
| C  | 1.189236  | -1.122988 | -0.000196 |
| Br | -0.781108 | -0.602949 | -0.000156 |
| H  | 0.988104  | -3.261769 | -0.000282 |
| H  | 3.432795  | -3.649162 | -0.000308 |
| H  | 4.993248  | -1.735067 | -0.000232 |
| H  | 4.133491  | 0.571986  | -0.000132 |
| H  | 3.059882  | 2.581611  | -0.000060 |
| H  | 1.680750  | 4.621691  | 0.000009  |
| H  | -0.787619 | 4.453034  | -0.000001 |
| H  | -1.883735 | 2.204737  | -0.000072 |
| C  | -3.469863 | -0.856491 | -0.000120 |
| O  | -2.629368 | 0.236586  | -0.000092 |
| O  | -2.870285 | -1.977079 | -0.000173 |
| O  | -4.677921 | -0.632093 | -0.000091 |

**B-Cl<sup>c</sup>**

|    |           |           |           |
|----|-----------|-----------|-----------|
| C  | 1.159291  | -0.989122 | -0.000183 |
| C  | 2.092596  | 0.030181  | -0.000155 |
| C  | 3.449826  | -0.279806 | -0.000177 |
| C  | 3.830368  | -1.611717 | -0.000226 |
| C  | 2.874254  | -2.626570 | -0.000254 |
| C  | 1.520664  | -2.321150 | -0.000232 |
| C  | 1.431027  | 1.328027  | -0.000105 |
| C  | 0.041914  | 1.237065  | -0.000097 |
| C  | -0.779862 | 2.348668  | -0.000052 |
| C  | -0.169464 | 3.594200  | -0.000014 |
| C  | 1.216177  | 3.717671  | -0.000021 |
| C  | 2.017019  | 2.590326  | -0.000066 |
| Cl | -0.603396 | -0.423215 | -0.000148 |
| O  | -2.471167 | 0.278860  | -0.000107 |
| C  | -3.238151 | -0.863186 | -0.000138 |
| O  | -4.462089 | -0.701222 | -0.000121 |
| O  | -2.593495 | -1.954588 | -0.000181 |
| H  | 0.760486  | -3.093907 | -0.000253 |

|   |           |           |           |
|---|-----------|-----------|-----------|
| H | 3.192889  | -3.662178 | -0.000292 |
| H | 4.882722  | -1.868683 | -0.000243 |
| H | 4.199414  | 0.503220  | -0.000155 |
| H | 3.096515  | 2.682460  | -0.000072 |
| H | 1.670847  | 4.700932  | 0.000009  |
| H | -0.789667 | 4.481936  | 0.000021  |
| H | -1.851137 | 2.201576  | -0.000048 |

**TS1-I'**

|   |           |           |           |
|---|-----------|-----------|-----------|
| C | -0.191270 | 1.082147  | -0.090461 |
| C | -1.301472 | 1.869679  | -0.065368 |
| H | -2.573116 | 1.248155  | 0.230619  |
| C | -1.005794 | 3.238435  | -0.062507 |
| H | -1.821178 | 3.956729  | -0.036316 |
| C | 0.300751  | 3.717205  | -0.076895 |
| H | 0.488616  | 4.786176  | -0.079345 |
| C | 1.376094  | 2.842277  | -0.060850 |
| H | 2.388567  | 3.227252  | -0.042379 |
| C | 1.147871  | 1.466605  | -0.054516 |
| C | 2.188124  | 0.433642  | 0.026635  |
| C | 3.559520  | 0.681919  | 0.089555  |
| H | 3.929699  | 1.699566  | 0.066207  |
| C | 4.457010  | -0.366943 | 0.186203  |
| H | 5.519771  | -0.162017 | 0.236087  |
| C | 4.000719  | -1.679445 | 0.219824  |
| H | 4.705780  | -2.498515 | 0.298735  |
| C | 2.639598  | -1.935936 | 0.153693  |
| H | 2.287033  | -2.961812 | 0.175472  |
| C | 1.738983  | -0.886745 | 0.057005  |
| I | -0.407888 | -1.073911 | -0.131139 |
| C | -3.583477 | -0.520709 | 0.160905  |
| O | -2.536735 | -0.935690 | -0.565800 |
| O | -4.541539 | -1.256742 | 0.343360  |
| O | -3.518043 | 0.699870  | 0.620026  |

**TS1-Br'**

|   |           |           |           |
|---|-----------|-----------|-----------|
| C | -0.266481 | 0.934405  | -0.090848 |
| C | -1.407090 | 1.669367  | -0.045940 |
| C | -1.167314 | 3.047987  | -0.028569 |
| C | 0.118588  | 3.581311  | -0.048913 |
| C | 1.230691  | 2.752860  | -0.050253 |
| C | 1.051384  | 1.371398  | -0.057566 |
| C | 2.085304  | 0.343793  | 0.015001  |
| C | 3.463012  | 0.538520  | 0.079577  |
| C | 4.308971  | -0.554206 | 0.168217  |
| C | 3.792584  | -1.845545 | 0.191726  |
| C | 2.421377  | -2.047614 | 0.123708  |

|    |           |           |           |
|----|-----------|-----------|-----------|
| C  | 1.581890  | -0.951785 | 0.039211  |
| Br | -0.381796 | -1.056670 | -0.151528 |
| H  | 2.016856  | -3.053601 | 0.137285  |
| H  | 4.461659  | -2.694654 | 0.263398  |
| H  | 5.380231  | -0.401723 | 0.220008  |
| H  | 3.873537  | 1.541087  | 0.063155  |
| H  | 2.229840  | 3.171743  | -0.032824 |
| H  | 0.259069  | 4.656998  | -0.039440 |
| H  | -2.013392 | 3.727579  | 0.015562  |
| H  | -2.561084 | 1.040752  | 0.216854  |
| C  | -3.501030 | -0.817480 | 0.107756  |
| O  | -2.418161 | -1.122541 | -0.622418 |
| O  | -3.530318 | 0.374641  | 0.628516  |
| O  | -4.405211 | -1.638060 | 0.232515  |

**TS1-Cl'**

|    |           |           |           |
|----|-----------|-----------|-----------|
| C  | -0.321281 | 0.761527  | -0.080879 |
| C  | 0.967755  | 1.276821  | -0.071190 |
| C  | 1.087408  | 2.662756  | -0.069075 |
| C  | -0.065196 | 3.432719  | -0.049396 |
| C  | -1.321429 | 2.833491  | -0.004826 |
| C  | -1.494722 | 1.446868  | -0.017963 |
| C  | 2.013709  | 0.269775  | -0.009713 |
| C  | 1.480860  | -1.008161 | 0.024135  |
| C  | 2.266052  | -2.139637 | 0.097097  |
| C  | 3.643050  | -1.975099 | 0.149808  |
| C  | 4.201146  | -0.699991 | 0.119585  |
| C  | 3.395632  | 0.424176  | 0.039370  |
| Cl | -0.314223 | -1.069091 | -0.132116 |
| H  | 1.817647  | -3.125784 | 0.113689  |
| H  | 4.286267  | -2.844020 | 0.213615  |
| H  | 5.277480  | -0.586338 | 0.159839  |
| H  | 3.836618  | 1.413437  | 0.017530  |
| H  | 2.067086  | 3.125377  | -0.070420 |
| H  | 0.018114  | 4.513944  | -0.044021 |
| H  | -2.202063 | 3.465094  | 0.053811  |
| H  | -2.557744 | 0.827120  | 0.218845  |
| C  | -3.450222 | -1.093737 | 0.050360  |
| O  | -2.319407 | -1.291173 | -0.639535 |
| O  | -4.312024 | -1.976874 | 0.067875  |
| O  | -3.572391 | 0.050010  | 0.651438  |

**D<sub>meta</sub>-Cl**

|   |           |           |           |
|---|-----------|-----------|-----------|
| C | -2.632045 | -0.321511 | 1.275590  |
| C | -2.530915 | -0.434724 | -0.097492 |
| C | -1.279985 | -0.447664 | -0.704748 |
| C | -0.093016 | -0.355315 | 0.022604  |

|                             |           |           |           |                             |           |           |           |
|-----------------------------|-----------|-----------|-----------|-----------------------------|-----------|-----------|-----------|
| C                           | -0.240492 | -0.211351 | 1.407998  | Cl                          | -0.445469 | -0.326927 | -2.773105 |
| C                           | -1.472289 | -0.201037 | 2.030854  | H                           | -3.017315 | 0.131836  | -1.831253 |
| H                           | -1.530667 | -0.093711 | 3.107655  | H                           | -3.935551 | 0.533000  | 0.433683  |
| H                           | 0.675561  | -0.077073 | 1.969751  | O                           | 1.726971  | 1.845266  | 0.535580  |
| C                           | 1.297225  | -0.373563 | -0.526556 | C                           | 1.839480  | 2.319312  | 1.780214  |
| C                           | 2.209904  | 0.555801  | 0.006674  | C                           | 1.274288  | 3.575952  | 2.016603  |
| C                           | 3.473626  | 0.428250  | -0.542906 | C                           | 2.423309  | 1.629608  | 2.845227  |
| C                           | 3.874771  | -0.497050 | -1.493396 | C                           | 1.286893  | 4.125884  | 3.285099  |
| C                           | 2.934645  | -1.406460 | -1.961928 | H                           | 0.824027  | 4.098294  | 1.181945  |
| C                           | 1.639709  | -1.344322 | -1.476463 | C                           | 2.425834  | 2.195424  | 4.110351  |
| H                           | 0.907207  | -2.061654 | -1.830164 | H                           | 2.895987  | 0.677092  | 2.657915  |
| H                           | 3.213118  | -2.156628 | -2.693542 | C                           | 1.861347  | 3.440627  | 4.348215  |
| H                           | 4.898477  | -0.511804 | -1.853816 | H                           | 0.840326  | 5.101025  | 3.445410  |
| Cl                          | -1.288979 | -0.513952 | -2.458351 | H                           | 2.887006  | 1.648767  | 4.925469  |
| H                           | -3.416983 | -0.499888 | -0.715233 | H                           | 1.873474  | 3.872206  | 5.341566  |
| H                           | -3.607568 | -0.313214 | 1.746886  |                             |           |           |           |
| O                           | 4.501660  | 1.338460  | -0.165233 | <b>D<sub>meta</sub>-Cl'</b> |           |           |           |
| C                           | 4.916796  | 1.392973  | 1.105681  | C                           | 3.334658  | 4.037428  | 2.745193  |
| C                           | 5.771391  | 2.447404  | 1.438209  | C                           | 2.969184  | 4.169958  | 1.355337  |
| C                           | 4.595975  | 0.450274  | 2.084986  | C                           | 3.233062  | 3.176292  | 0.498224  |
| C                           | 6.297140  | 2.553131  | 2.713360  | C                           | 4.026212  | 1.966092  | 0.875563  |
| H                           | 6.006236  | 3.176150  | 0.672480  | C                           | 4.526020  | 1.948633  | 2.317274  |
| C                           | 5.130237  | 0.570907  | 3.357155  | C                           | 4.024130  | 2.985514  | 3.220354  |
| H                           | 3.916592  | -0.352606 | 1.841262  | C                           | 3.210508  | 0.712732  | 0.533494  |
| C                           | 5.982365  | 1.615672  | 3.688073  | C                           | 1.832249  | 0.901513  | 0.338138  |
| H                           | 6.957655  | 3.380422  | 2.948572  | C                           | 1.150722  | -0.287795 | 0.020035  |
| H                           | 4.868552  | -0.168220 | 4.106193  | C                           | 1.765911  | -1.535512 | -0.090999 |
| H                           | 6.389701  | 1.700498  | 4.688047  | C                           | 3.134430  | -1.649516 | 0.110716  |
|                             |           |           |           | C                           | 3.863915  | -0.513825 | 0.427302  |
| <b>D<sub>ortho</sub>-Cl</b> |           |           |           | C                           | -0.330225 | -0.232470 | -0.145612 |
| C                           | -2.875462 | 0.354194  | 0.301345  | C                           | -0.980679 | 0.486704  | -1.149236 |
| C                           | -2.368893 | 0.127692  | -0.965120 | C                           | -2.363912 | 0.534152  | -1.245044 |
| C                           | -1.009229 | -0.096142 | -1.136681 | C                           | -3.147089 | -0.152823 | -0.332599 |
| C                           | -0.117526 | -0.110234 | -0.064973 | C                           | -2.533931 | -0.891928 | 0.666853  |
| C                           | -0.665030 | 0.126741  | 1.199456  | C                           | -1.151871 | -0.924788 | 0.747079  |
| C                           | -2.014026 | 0.357558  | 1.389190  | Cl                          | -0.074474 | 1.325570  | -2.379108 |
| H                           | -2.392112 | 0.543073  | 2.386975  | H                           | 2.890855  | 3.218847  | -0.526453 |
| H                           | 0.008562  | 0.134876  | 2.047284  | H                           | -3.130885 | -1.436148 | 1.389326  |
| C                           | 1.338606  | -0.363930 | -0.194765 | H                           | -0.667857 | -1.486780 | 1.536782  |
| C                           | 2.293778  | 0.585396  | 0.184190  | H                           | 1.182139  | -2.418064 | -0.342861 |
| C                           | 3.669894  | 0.437107  | 0.174561  | H                           | 3.626012  | -2.612017 | 0.019238  |
| C                           | 4.054323  | -0.834933 | -0.281933 | H                           | 4.931959  | -0.586427 | 0.606610  |
| C                           | 3.166510  | -1.827372 | -0.697070 | H                           | -2.818123 | 1.105725  | -2.043930 |
| C                           | 1.802213  | -1.595006 | -0.653779 | H                           | -4.226975 | -0.109908 | -0.408170 |
| H                           | 1.094068  | -2.355978 | -0.961988 | H                           | 4.942227  | 1.961690  | 0.267895  |
| H                           | 3.533767  | -2.788107 | -1.049831 | O                           | 5.342319  | 1.125400  | 2.692187  |
| H                           | 5.117353  | -1.082198 | -0.326482 | H                           | 2.398045  | 5.035362  | 1.043674  |

|   |          |          |          |
|---|----------|----------|----------|
| H | 4.290868 | 2.893949 | 4.266083 |
| H | 3.025170 | 4.820122 | 3.432196 |

**D<sub>ortho</sub>-Cl'**

|    |           |           |           |
|----|-----------|-----------|-----------|
| C  | -1.244557 | 3.144131  | 1.687637  |
| C  | -0.271204 | 3.558870  | 0.698284  |
| C  | 0.921821  | 2.960174  | 0.645021  |
| C  | 1.327696  | 1.851678  | 1.552465  |
| C  | 0.309355  | 1.487236  | 2.619141  |
| C  | -0.985722 | 2.184862  | 2.588349  |
| C  | 1.925288  | 0.693351  | 0.719086  |
| C  | 1.079589  | -0.203085 | 0.044293  |
| C  | 1.645213  | -1.225814 | -0.711863 |
| C  | 3.024539  | -1.315124 | -0.810707 |
| C  | 3.823500  | -0.374491 | -0.170095 |
| C  | 3.330606  | 0.674628  | 0.626307  |
| C  | -0.406361 | -0.129311 | 0.093641  |
| C  | -1.171334 | 0.529220  | -0.868409 |
| C  | -2.554582 | 0.594872  | -0.793128 |
| C  | -3.215805 | -0.027667 | 0.251502  |
| C  | -2.487610 | -0.718017 | 1.207419  |
| C  | -1.107174 | -0.761750 | 1.122311  |
| Cl | -0.404665 | 1.292995  | -2.234599 |
| H  | 1.660646  | 3.237772  | -0.098170 |
| H  | -2.991820 | -1.211610 | 2.029090  |
| H  | -0.529271 | -1.271370 | 1.881883  |
| H  | 1.000628  | -1.930912 | -1.226296 |
| H  | 3.467046  | -2.115319 | -1.400082 |
| H  | 4.902920  | -0.472606 | -0.303501 |
| H  | -3.102699 | 1.129493  | -1.557516 |
| H  | -4.296121 | 0.025735  | 0.311508  |
| O  | 0.553825  | 0.674672  | 3.491867  |
| H  | -0.537857 | 4.337308  | -0.006054 |
| H  | -1.719625 | 1.871172  | 3.320559  |
| H  | -2.216066 | 3.628853  | 1.688069  |
| H  | 2.216641  | 2.190187  | 2.099604  |

**D<sub>meta</sub>-Br**

|   |           |          |           |
|---|-----------|----------|-----------|
| C | 2.337003  | 1.211050 | 1.293844  |
| C | 2.241073  | 1.237369 | -0.084370 |
| C | 1.010453  | 1.034134 | -0.698664 |
| C | -0.160274 | 0.808417 | 0.022635  |
| C | -0.013820 | 0.758085 | 1.415492  |
| C | 1.196687  | 0.960140 | 2.046405  |
| H | 1.254255  | 0.917200 | 3.127760  |
| H | -0.908478 | 0.520744 | 1.977585  |
| C | -1.533959 | 0.601250 | -0.529030 |

|    |           |           |           |
|----|-----------|-----------|-----------|
| C  | -2.294668 | -0.448658 | 0.017119  |
| C  | -3.559040 | -0.526795 | -0.540816 |
| C  | -4.091938 | 0.311379  | -1.507365 |
| C  | -3.301046 | 1.348584  | -1.986241 |
| C  | -2.015247 | 1.493950  | -1.494654 |
| H  | -1.397782 | 2.309086  | -1.856181 |
| H  | -3.687806 | 2.036106  | -2.730035 |
| H  | -5.103391 | 0.162295  | -1.871798 |
| Br | 1.052783  | 0.994484  | -2.624786 |
| H  | 3.120698  | 1.399123  | -0.692794 |
| H  | 3.296438  | 1.370590  | 1.771299  |
| O  | -4.435996 | -1.580098 | -0.155441 |
| C  | -4.836670 | -1.691675 | 1.116483  |
| C  | -5.507320 | -2.869198 | 1.457558  |
| C  | -4.676152 | -0.701342 | 2.088133  |
| C  | -6.010296 | -3.049809 | 2.733483  |
| H  | -5.618265 | -3.632670 | 0.697733  |
| C  | -5.185103 | -0.897990 | 3.361232  |
| H  | -4.138301 | 0.200881  | 1.838959  |
| C  | -5.854660 | -2.065772 | 3.700591  |
| H  | -6.526307 | -3.972381 | 2.975460  |
| H  | -5.049337 | -0.119973 | 4.104281  |
| H  | -6.243632 | -2.208306 | 4.701325  |

**D<sub>ortho</sub>-Br**

|    |           |           |           |
|----|-----------|-----------|-----------|
| C  | 2.705320  | 0.652854  | 0.374948  |
| C  | 2.183725  | 0.645688  | -0.906174 |
| C  | 0.808332  | 0.615102  | -1.090513 |
| C  | -0.085252 | 0.602621  | -0.022609 |
| C  | 0.477813  | 0.604558  | 1.257509  |
| C  | 1.843966  | 0.626770  | 1.462317  |
| H  | 2.235988  | 0.619779  | 2.471925  |
| H  | -0.196610 | 0.576187  | 2.104343  |
| C  | -1.562569 | 0.592644  | -0.163297 |
| C  | -2.336848 | -0.491411 | 0.260839  |
| C  | -3.717172 | -0.590843 | 0.243291  |
| C  | -4.315910 | 0.569822  | -0.276132 |
| C  | -3.614051 | 1.683642  | -0.736800 |
| C  | -2.230335 | 1.699990  | -0.680408 |
| H  | -1.664165 | 2.558579  | -1.023917 |
| H  | -4.142622 | 2.546098  | -1.135686 |
| H  | -5.405380 | 0.622131  | -0.334765 |
| Br | 0.178891  | 0.543624  | -2.899641 |
| H  | 2.838996  | 0.651634  | -1.766676 |
| H  | 3.778785  | 0.671292  | 0.518961  |
| O  | -1.556465 | -1.609512 | 0.676645  |
| C  | -1.569138 | -2.010565 | 1.951371  |



|   |           |           |          |
|---|-----------|-----------|----------|
| C | -0.777886 | -3.121888 | 2.257474 |
| C | -2.266114 | -1.373097 | 2.980204 |
| C | -0.680546 | -3.579765 | 3.558251 |
| H | -0.242437 | -3.604907 | 1.449892 |
| C | -2.155949 | -1.845072 | 4.278695 |
| H | -2.909459 | -0.539413 | 2.741434 |
| C | -1.367158 | -2.944780 | 4.585535 |
| H | -0.058614 | -4.441905 | 3.772495 |
| H | -2.707026 | -1.341550 | 5.065315 |
| H | -1.293008 | -3.304507 | 5.604476 |

**D<sub>meta</sub>-Br'**

|    |           |           |           |
|----|-----------|-----------|-----------|
| C  | -3.089329 | -3.564304 | 3.196495  |
| C  | -2.551046 | -3.919115 | 1.904254  |
| C  | -2.871424 | -3.194502 | 0.826192  |
| C  | -3.882910 | -2.094582 | 0.855137  |
| C  | -4.549110 | -1.873035 | 2.209570  |
| C  | -3.989463 | -2.580439 | 3.363601  |
| C  | -3.242565 | -0.807279 | 0.316532  |
| C  | -1.839704 | -0.758647 | 0.305265  |
| C  | -1.318560 | 0.438956  | -0.223100 |
| C  | -2.115879 | 1.502701  | -0.650315 |
| C  | -3.496867 | 1.399325  | -0.588417 |
| C  | -4.068290 | 0.229182  | -0.111088 |
| C  | 0.165843  | 0.591158  | -0.237648 |
| C  | 0.952993  | 1.039110  | -1.296522 |
| C  | 2.334722  | 1.162192  | -1.203838 |
| C  | 2.979454  | 0.825311  | -0.028881 |
| C  | 2.231457  | 0.349052  | 1.040593  |
| C  | 0.861128  | 0.232529  | 0.925536  |
| Br | 0.204202  | 1.446346  | -3.024689 |
| H  | -2.410544 | -3.390029 | -0.132200 |
| H  | 2.720350  | 0.065544  | 1.965411  |
| H  | 0.260325  | -0.168852 | 1.732014  |
| H  | -1.669366 | 2.421261  | -1.017365 |
| H  | -4.122358 | 2.225929  | -0.907238 |
| H  | -5.147903 | 0.137781  | -0.045962 |
| H  | 2.898532  | 1.507200  | -2.060136 |
| H  | 4.056135  | 0.923040  | 0.043184  |
| O  | -5.532897 | -1.163738 | 2.321343  |
| H  | -1.817656 | -4.713244 | 1.842113  |
| H  | -4.386507 | -2.319062 | 4.336770  |
| H  | -2.737372 | -4.112840 | 4.065644  |
| H  | -4.706709 | -2.377414 | 0.185082  |

**D<sub>ortho</sub>-Br'**

|   |          |           |          |
|---|----------|-----------|----------|
| C | 1.532325 | -2.416815 | 1.761696 |
|---|----------|-----------|----------|

|    |           |           |           |
|----|-----------|-----------|-----------|
| C  | 0.584171  | -3.020853 | 0.848693  |
| C  | -0.680788 | -2.592400 | 0.821594  |
| C  | -1.196336 | -1.493153 | 1.683284  |
| C  | -0.193516 | -0.928638 | 2.674910  |
| C  | 1.182626  | -1.445709 | 2.618029  |
| C  | -1.981598 | -0.480055 | 0.816785  |
| C  | -1.297030 | 0.479019  | 0.051670  |
| C  | -2.029223 | 1.369766  | -0.728101 |
| C  | -3.410532 | 1.266420  | -0.762295 |
| C  | -4.044441 | 0.265570  | -0.034152 |
| C  | -3.378695 | -0.657025 | 0.792494  |
| C  | 0.185689  | 0.604541  | 0.022721  |
| C  | 0.990533  | 0.001729  | -0.941687 |
| C  | 2.371097  | 0.127903  | -0.937448 |
| C  | 2.986967  | 0.891034  | 0.040047  |
| C  | 2.214307  | 1.530250  | 0.996419  |
| C  | 0.838849  | 1.383130  | 0.981385  |
| Br | 0.210787  | -1.014277 | -2.364269 |
| H  | -1.404882 | -3.012764 | 0.133018  |
| H  | 2.681871  | 2.133567  | 1.764899  |
| H  | 0.230898  | 1.853986  | 1.742499  |
| H  | -1.509378 | 2.122069  | -1.312056 |
| H  | -3.983577 | 1.963201  | -1.370233 |
| H  | -5.131632 | 0.207989  | -0.119463 |
| H  | 2.957589  | -0.367060 | -1.699592 |
| H  | 4.066068  | 0.986732  | 0.046184  |
| H  | -2.006742 | -1.912362 | 2.292875  |
| O  | -0.510462 | -0.103435 | 3.511827  |
| H  | 0.925205  | -3.798054 | 0.175872  |
| H  | 1.896805  | -0.990406 | 3.293173  |
| H  | 2.560370  | -2.765333 | 1.740747  |

**D<sub>meta</sub>-I**

|   |           |           |           |
|---|-----------|-----------|-----------|
| C | -1.814492 | -2.104162 | 1.223760  |
| C | -1.782171 | -0.964445 | 0.436788  |
| C | -0.582632 | -0.519193 | -0.101332 |
| C | 0.619158  | -1.186025 | 0.132906  |
| C | 0.549107  | -2.340995 | 0.917844  |
| C | -0.638822 | -2.798417 | 1.460789  |
| H | -0.644507 | -3.692081 | 2.074119  |
| H | 1.473450  | -2.871563 | 1.113067  |
| C | 1.946830  | -0.742636 | -0.385820 |
| C | 2.428157  | 0.513492  | 0.014499  |
| C | 3.690992  | 0.769371  | -0.493144 |
| C | 4.436974  | -0.061758 | -1.317016 |
| C | 3.896914  | -1.286583 | -1.686693 |
| C | 2.643882  | -1.634776 | -1.208756 |

|   |           |           |           |
|---|-----------|-----------|-----------|
| H | 2.204154  | -2.588952 | -1.487019 |
| H | 4.447800  | -1.956172 | -2.337684 |
| H | 5.416322  | 0.247172  | -1.668272 |
| I | -0.671721 | 1.189505  | -1.347876 |
| H | -2.696030 | -0.422823 | 0.231773  |
| H | -2.753772 | -2.442615 | 1.644512  |
| O | 4.320232  | 2.019708  | -0.250510 |
| C | 4.502058  | 2.475868  | 0.995943  |
| C | 4.930329  | 3.800703  | 1.110743  |
| C | 4.349744  | 1.712232  | 2.154803  |
| C | 5.207891  | 4.347393  | 2.351019  |
| H | 5.036606  | 4.383981  | 0.204590  |
| C | 4.630882  | 2.274838  | 3.388790  |
| H | 3.983497  | 0.700255  | 2.075526  |
| C | 5.061632  | 3.589612  | 3.504854  |
| H | 5.538271  | 5.378238  | 2.415661  |
| H | 4.502221  | 1.670042  | 4.279496  |
| H | 5.272348  | 4.017687  | 4.477241  |

**D<sub>ortho-I</sub>**

|   |           |           |           |
|---|-----------|-----------|-----------|
| C | -2.187097 | -2.379477 | 0.531897  |
| C | -2.068536 | -1.048894 | 0.166180  |
| C | -0.812619 | -0.492982 | -0.031649 |
| C | 0.353814  | -1.238076 | 0.132557  |
| C | 0.200370  | -2.577555 | 0.495886  |
| C | -1.044968 | -3.147609 | 0.693775  |
| H | -1.122759 | -4.189789 | 0.979789  |
| H | 1.098905  | -3.166426 | 0.631940  |
| C | 1.723060  | -0.700061 | -0.065999 |
| C | 2.365567  | 0.079987  | 0.901290  |
| C | 3.656219  | 0.576830  | 0.837458  |
| C | 4.294710  | 0.231274  | -0.365335 |
| C | 3.722027  | -0.543264 | -1.373094 |
| C | 2.430006  | -1.021138 | -1.220938 |
| H | 1.959243  | -1.628997 | -1.986233 |
| H | 4.279161  | -0.780897 | -2.275914 |
| H | 5.318411  | 0.572154  | -0.535623 |
| I | -0.715145 | 1.532970  | -0.625485 |
| H | -2.954096 | -0.442445 | 0.032496  |
| H | -3.169407 | -2.808570 | 0.688302  |
| O | 1.570453  | 0.242398  | 2.064454  |
| C | 1.424884  | 1.417158  | 2.695949  |
| C | 1.865281  | 2.652290  | 2.217922  |
| C | 0.718146  | 1.368660  | 3.899271  |
| C | 1.587523  | 3.801335  | 2.939085  |
| H | 2.445680  | 2.684959  | 1.309369  |
| C | 0.450006  | 2.526603  | 4.607990  |

|   |           |          |          |
|---|-----------|----------|----------|
| H | 0.381130  | 0.402879 | 4.254839 |
| C | 0.881805  | 3.757393 | 4.134415 |
| H | 1.937092  | 4.753685 | 2.555856 |
| H | -0.103618 | 2.464586 | 5.538418 |
| H | 0.676154  | 4.665516 | 4.688136 |

**D<sub>meta-I'</sub>**

|   |           |           |           |
|---|-----------|-----------|-----------|
| C | 2.037859  | 4.254427  | 2.799238  |
| C | 1.580131  | 4.243647  | 1.430179  |
| C | 2.183711  | 3.457818  | 0.530758  |
| C | 3.417860  | 2.670944  | 0.837744  |
| C | 3.952928  | 2.838863  | 2.256645  |
| C | 3.119484  | 3.570735  | 3.211717  |
| C | 3.163972  | 1.199804  | 0.485927  |
| C | 1.821178  | 0.817583  | 0.338039  |
| C | 1.659828  | -0.534347 | -0.007290 |
| C | 2.719063  | -1.427249 | -0.180301 |
| C | 4.023950  | -0.984657 | -0.018249 |
| C | 4.248883  | 0.341963  | 0.318975  |
| C | 0.273787  | -1.062011 | -0.149860 |
| C | -0.674932 | -0.553449 | -1.036511 |
| C | -1.963600 | -1.063996 | -1.103564 |
| C | -2.341214 | -2.114825 | -0.283247 |
| C | -1.416678 | -2.653307 | 0.597503  |
| C | -0.136308 | -2.131373 | 0.652912  |
| I | -0.199246 | 0.997072  | -2.401916 |
| H | 1.802754  | 3.371303  | -0.477673 |
| H | -1.694091 | -3.474683 | 1.248057  |
| H | 0.584005  | -2.536824 | 1.353264  |
| H | 2.531013  | -2.462400 | -0.455787 |
| H | 4.856930  | -1.664615 | -0.159807 |
| H | 5.262600  | 0.701346  | 0.464551  |
| H | -2.671222 | -0.645886 | -1.807185 |
| H | -3.350250 | -2.505652 | -0.337267 |
| O | 5.049653  | 2.411862  | 2.571862  |
| H | 0.690700  | 4.803465  | 1.170137  |
| H | 3.452769  | 3.583240  | 4.242148  |
| H | 1.471202  | 4.833289  | 3.523172  |
| H | 4.225209  | 3.046834  | 0.193556  |

**D<sub>ortho-I'</sub>**

|   |           |          |          |
|---|-----------|----------|----------|
| C | -0.892743 | 3.239934 | 2.782392 |
| C | -0.550874 | 3.562117 | 1.419712 |
| C | -0.059040 | 2.610891 | 0.615326 |
| C | 0.010619  | 1.169494 | 1.004090 |
| C | -0.216632 | 0.900505 | 2.492872 |
| C | -0.734467 | 2.008286 | 3.299304 |

|                            |           |           |           |                             |           |           |           |
|----------------------------|-----------|-----------|-----------|-----------------------------|-----------|-----------|-----------|
| C                          | 1.295897  | 0.563166  | 0.478704  | C                           | -1.148636 | -0.651333 | 2.139836  |
| C                          | 1.309331  | -0.709875 | -0.102244 | H                           | -1.235280 | -1.030646 | 3.150802  |
| C                          | 2.516358  | -1.228949 | -0.562907 | H                           | 0.860971  | -1.360344 | 1.875442  |
| C                          | 3.667770  | -0.465867 | -0.448372 | C                           | 1.504308  | -0.562735 | -0.556436 |
| C                          | 3.607348  | 0.806288  | 0.114714  | C                           | 2.589612  | 0.104172  | 0.029306  |
| C                          | 2.429534  | 1.390134  | 0.606876  | C                           | 3.789928  | -0.121104 | -0.622736 |
| C                          | 0.079825  | -1.530670 | -0.262859 | C                           | 3.966284  | -0.924680 | -1.737626 |
| C                          | -0.726428 | -1.486900 | -1.398863 | C                           | 2.852936  | -1.556753 | -2.272375 |
| C                          | -1.858899 | -2.279214 | -1.530119 | C                           | 1.611226  | -1.374429 | -1.686022 |
| C                          | -2.212354 | -3.142897 | -0.507499 | H                           | 0.737841  | -1.863892 | -2.102348 |
| C                          | -1.433964 | -3.202464 | 0.638832  | H                           | 2.957959  | -2.191593 | -3.143524 |
| C                          | -0.308844 | -2.406129 | 0.754053  | H                           | 4.948026  | -1.047541 | -2.179339 |
| I                          | -0.255494 | -0.169318 | -2.989697 | Cl                          | -0.827060 | 0.894487  | -2.075763 |
| H                          | 0.262664  | 2.839260  | -0.391955 | H                           | -2.919146 | 0.972021  | -0.239627 |
| H                          | -1.708654 | -3.864281 | 1.451294  | H                           | -3.143501 | 0.155635  | 2.084768  |
| H                          | 0.284269  | -2.415382 | 1.657780  | O                           | 4.967176  | 0.534384  | -0.191253 |
| H                          | 2.541188  | -2.213806 | -1.017417 | C                           | 4.991572  | 1.022311  | 1.064915  |
| H                          | 4.611578  | -0.868674 | -0.809182 | C                           | 5.184652  | 2.386756  | 1.251764  |
| H                          | 4.542349  | 1.367406  | 0.167519  | C                           | 4.875855  | 0.187583  | 2.177861  |
| H                          | -2.462806 | -2.218594 | -2.425375 | C                           | 5.238780  | 2.916744  | 2.536195  |
| H                          | -3.097603 | -3.759449 | -0.607414 | H                           | 5.284314  | 3.018313  | 0.378545  |
| O                          | -0.036240 | -0.199537 | 2.980433  | C                           | 4.929338  | 0.721655  | 3.453644  |
| H                          | -0.625466 | 4.589873  | 1.086965  | H                           | 4.729212  | -0.872179 | 2.020067  |
| H                          | -0.940919 | 1.791778  | 4.340486  | C                           | 5.098997  | 2.091830  | 3.643389  |
| H                          | -1.260162 | 4.037774  | 3.421782  | H                           | 5.398915  | 3.979909  | 2.669304  |
| H                          | -0.869159 | 0.689476  | 0.538157  | H                           | 4.848177  | 0.064252  | 4.311000  |
| <b>PhO<sup>-</sup></b>     |           |           |           | H                           | 5.153862  | 2.502748  | 4.643360  |
| C                          | -1.004247 | -0.011370 | 0.000015  | K                           | 2.017178  | 1.774860  | 2.109522  |
| C                          | -0.206728 | -1.212153 | 0.000007  | <b>E<sub>ortho-Cl</sub></b> |           |           |           |
| C                          | 1.172945  | -1.190122 | 0.000012  | C                           | -3.039255 | 0.023994  | 0.132695  |
| C                          | 1.889431  | 0.007913  | 0.000016  | C                           | -2.439838 | 0.028985  | -1.113763 |
| C                          | 1.156964  | 1.195801  | 0.000009  | C                           | -1.061801 | -0.096829 | -1.216606 |
| C                          | -0.223239 | 1.199578  | 0.000004  | C                           | -0.252018 | -0.235291 | -0.092004 |
| H                          | -0.770993 | 2.137480  | -0.000006 | C                           | -0.886186 | -0.231656 | 1.150067  |
| H                          | 1.686416  | 2.146609  | 0.000007  | C                           | -2.257676 | -0.104214 | 1.271008  |
| H                          | 2.973249  | 0.015101  | 0.000025  | H                           | -2.716505 | -0.107221 | 2.251462  |
| H                          | 1.715412  | -2.133562 | 0.000014  | H                           | -0.272199 | -0.334289 | 2.036466  |
| H                          | -0.742793 | -2.156796 | 0.000000  | C                           | 1.223034  | -0.387698 | -0.163509 |
| O                          | -2.262452 | -0.020304 | -0.000013 | C                           | 2.084519  | 0.607883  | 0.286287  |
| <b>E<sub>meta-Cl</sub></b> |           |           |           | C                           | 3.471309  | 0.557172  | 0.311679  |
| C                          | -2.217959 | 0.003841  | 1.544371  | C                           | 3.977150  | -0.652303 | -0.183274 |
| C                          | -2.099462 | 0.456471  | 0.242590  | C                           | 3.176647  | -1.687653 | -0.661384 |
| C                          | -0.916394 | 0.256572  | -0.458684 | C                           | 1.800055  | -1.556149 | -0.653082 |
| C                          | 0.179654  | -0.390794 | 0.110570  | H                           | 1.162601  | -2.351648 | -1.019515 |
| C                          | 0.022898  | -0.839639 | 1.426220  | H                           | 3.625353  | -2.599438 | -1.040469 |
|                            |           |           |           | H                           | 5.054549  | -0.809634 | -0.214090 |

|    |           |           |           |
|----|-----------|-----------|-----------|
| Cl | -0.360444 | -0.049760 | -2.809125 |
| H  | -3.031277 | 0.135026  | -2.013011 |
| H  | -4.114422 | 0.122140  | 0.211305  |
| O  | 1.432892  | 1.810311  | 0.681688  |
| C  | 1.738277  | 2.349682  | 1.866114  |
| C  | 1.667133  | 3.740255  | 1.976849  |
| C  | 2.125537  | 1.596924  | 2.979149  |
| C  | 2.008888  | 4.366468  | 3.166325  |
| H  | 1.344056  | 4.308859  | 1.114070  |
| C  | 2.464314  | 2.236495  | 4.161093  |
| H  | 2.182989  | 0.520867  | 2.893910  |
| C  | 2.424414  | 3.622588  | 4.263348  |
| H  | 1.946422  | 5.445744  | 3.235873  |
| H  | 2.760411  | 1.640993  | 5.016396  |
| H  | 2.687658  | 4.112405  | 5.191567  |
| K  | 4.747279  | 2.673676  | 1.519142  |

**E<sub>meta</sub>-Cl<sup>+</sup>**

|    |           |           |           |
|----|-----------|-----------|-----------|
| C  | 3.189680  | 4.287451  | 2.293697  |
| C  | 3.514338  | 4.168907  | 0.881375  |
| C  | 3.920330  | 2.998451  | 0.379343  |
| C  | 4.098769  | 1.762958  | 1.202075  |
| C  | 3.796883  | 1.938155  | 2.687523  |
| C  | 3.272518  | 3.245088  | 3.134763  |
| C  | 3.276019  | 0.617727  | 0.607849  |
| C  | 1.885708  | 0.792041  | 0.544507  |
| C  | 1.198664  | -0.291859 | -0.023814 |
| C  | 1.828357  | -1.446933 | -0.489637 |
| C  | 3.205349  | -1.559018 | -0.405504 |
| C  | 3.933862  | -0.518967 | 0.151978  |
| C  | -0.292494 | -0.247744 | -0.066491 |
| C  | -1.036901 | 0.673009  | -0.805310 |
| C  | -2.424649 | 0.707895  | -0.775664 |
| C  | -3.116639 | -0.201649 | 0.004505  |
| C  | -2.411922 | -1.142654 | 0.740126  |
| C  | -1.028987 | -1.157625 | 0.698165  |
| Cl | -0.243557 | 1.834165  | -1.854004 |
| H  | 4.140031  | 2.901568  | -0.677745 |
| H  | -2.940365 | -1.864275 | 1.350163  |
| H  | -0.476610 | -1.883339 | 1.282110  |
| H  | 1.245677  | -2.254981 | -0.920936 |
| H  | 3.706908  | -2.448619 | -0.766001 |
| H  | 5.012938  | -0.603795 | 0.233274  |
| H  | -2.952643 | 1.433195  | -1.380465 |
| H  | -4.198503 | -0.179345 | 0.025684  |
| H  | 5.160003  | 1.487590  | 1.153847  |
| O  | 4.017762  | 1.056533  | 3.485345  |

|   |          |          |          |
|---|----------|----------|----------|
| H | 3.419446 | 5.042409 | 0.247782 |
| H | 3.034631 | 3.333267 | 4.187967 |
| H | 2.869952 | 5.255556 | 2.668226 |
| K | 0.375323 | 2.956028 | 1.189243 |

**E<sub>ortho</sub>-Cl<sup>+</sup>**

|    |           |           |           |
|----|-----------|-----------|-----------|
| C  | -3.083006 | 0.323985  | -0.322379 |
| C  | -2.237555 | 0.709822  | -1.347251 |
| C  | -0.871120 | 0.529002  | -1.208430 |
| C  | -0.304582 | -0.015226 | -0.055881 |
| C  | -1.189307 | -0.420765 | 0.942361  |
| C  | -2.556629 | -0.253905 | 0.821761  |
| H  | -3.211170 | -0.576432 | 1.621180  |
| H  | -0.775831 | -0.872169 | 1.834096  |
| C  | 1.161367  | -0.190059 | 0.133120  |
| C  | 1.927101  | 0.642478  | 0.972491  |
| C  | 3.322190  | 0.514646  | 1.145714  |
| C  | 3.885447  | -0.566523 | 0.440906  |
| C  | 3.163280  | -1.408544 | -0.400831 |
| C  | 1.800058  | -1.211787 | -0.564732 |
| H  | 1.223258  | -1.851174 | -1.222532 |
| H  | 3.653094  | -2.218475 | -0.932935 |
| H  | 4.953788  | -0.757027 | 0.536826  |
| Cl | 0.125752  | 0.997523  | -2.567659 |
| H  | -2.629274 | 1.147027  | -2.255279 |
| H  | -4.150929 | 0.464729  | -0.427633 |
| C  | 1.261736  | 1.818675  | 1.700821  |
| C  | 0.570932  | 2.809719  | 0.788063  |
| C  | 0.502550  | 1.434605  | 2.921945  |
| C  | -0.733202 | 3.314779  | 1.186182  |
| C  | -0.680797 | 1.969416  | 3.233378  |
| H  | 0.984523  | 0.711177  | 3.569573  |
| C  | -1.306156 | 2.913934  | 2.334917  |
| H  | -1.219401 | 4.009549  | 0.513718  |
| H  | -1.198565 | 1.690896  | 4.141969  |
| H  | -2.282203 | 3.303682  | 2.602523  |
| O  | 1.119986  | 3.198963  | -0.238926 |
| H  | 2.141533  | 2.365974  | 2.077244  |
| K  | 3.163122  | 1.920417  | -1.329343 |

**E<sub>meta</sub>-Br**

|   |           |           |          |
|---|-----------|-----------|----------|
| C | 2.208700  | 1.027544  | 1.301110 |
| C | 1.608549  | -0.204309 | 1.104142 |
| C | 0.338881  | -0.267659 | 0.548246 |
| C | -0.376659 | 0.869386  | 0.177190 |
| C | 0.269046  | 2.093061  | 0.377998 |
| C | 1.534925  | 2.180640  | 0.929167 |

|    |           |           |           |
|----|-----------|-----------|-----------|
| H  | 1.995006  | 3.150448  | 1.071017  |
| H  | -0.263815 | 2.992996  | 0.096905  |
| C  | -1.761402 | 0.856621  | -0.378104 |
| C  | -2.801734 | 0.405904  | 0.445948  |
| C  | -4.043540 | 0.479585  | -0.164181 |
| C  | -4.301262 | 0.952376  | -1.440358 |
| C  | -3.231286 | 1.399617  | -2.201413 |
| C  | -1.952796 | 1.352574  | -1.669772 |
| H  | -1.107845 | 1.691184  | -2.260179 |
| H  | -3.395427 | 1.774005  | -3.204228 |
| H  | -5.313227 | 0.969932  | -1.827159 |
| Br | -0.375754 | -2.031952 | 0.252725  |
| H  | 2.130079  | -1.115759 | 1.363059  |
| H  | 3.200174  | 1.079743  | 1.732186  |
| O  | -5.196550 | 0.089011  | 0.561992  |
| C  | -5.088744 | -0.990169 | 1.355424  |
| C  | -4.486089 | -2.176247 | 0.926547  |
| C  | -5.624633 | -0.923295 | 2.639378  |
| C  | -4.402875 | -3.259385 | 1.784495  |
| H  | -4.067082 | -2.221818 | -0.069237 |
| C  | -5.536757 | -2.016513 | 3.492091  |
| H  | -6.098272 | -0.002209 | 2.953519  |
| C  | -4.914784 | -3.186289 | 3.077577  |
| H  | -3.936333 | -4.174212 | 1.439389  |
| H  | -5.960746 | -1.951645 | 4.486909  |
| H  | -4.852746 | -4.039585 | 3.740434  |
| K  | -2.293307 | -0.890192 | 2.825332  |

**E<sub>ortho</sub>-Br**

|    |           |           |           |
|----|-----------|-----------|-----------|
| C  | 2.476908  | 0.366945  | 0.788187  |
| C  | 1.979799  | -0.173282 | -0.386075 |
| C  | 0.625809  | -0.081917 | -0.665884 |
| C  | -0.263272 | 0.539868  | 0.207150  |
| C  | 0.268699  | 1.082254  | 1.376653  |
| C  | 1.618514  | 1.001823  | 1.670715  |
| H  | 1.997013  | 1.429135  | 2.590359  |
| H  | -0.410659 | 1.564315  | 2.068470  |
| C  | -1.724723 | 0.633151  | -0.033978 |
| C  | -2.562820 | -0.475438 | 0.077835  |
| C  | -3.932531 | -0.507507 | -0.099925 |
| C  | -4.468507 | 0.751328  | -0.416414 |
| C  | -3.699714 | 1.903850  | -0.525351 |
| C  | -2.326177 | 1.848285  | -0.333416 |
| H  | -1.714001 | 2.737226  | -0.428820 |
| H  | -4.165506 | 2.853259  | -0.766765 |
| H  | -5.539081 | 0.848806  | -0.583457 |
| Br | 0.013940  | -0.806662 | -2.324731 |

|   |           |           |           |
|---|-----------|-----------|-----------|
| H | 2.641664  | -0.660183 | -1.088911 |
| H | 3.534685  | 0.292540  | 1.006037  |
| O | -1.907668 | -1.712362 | 0.380103  |
| C | -1.588205 | -1.983047 | 1.670131  |
| C | -0.763752 | -3.086067 | 1.885506  |
| C | -2.073221 | -1.255925 | 2.753751  |
| C | -0.425903 | -3.455141 | 3.175739  |
| H | -0.371698 | -3.616879 | 1.026630  |
| C | -1.721530 | -1.638591 | 4.040132  |
| H | -2.710057 | -0.399579 | 2.580536  |
| C | -0.902806 | -2.734568 | 4.262459  |
| H | 0.226345  | -4.305465 | 3.332286  |
| H | -2.096109 | -1.065170 | 4.879208  |
| H | -0.631874 | -3.020507 | 5.270215  |
| K | -4.176327 | -3.181100 | 0.229203  |

**E<sub>meta</sub>-Br'**

|    |           |           |           |
|----|-----------|-----------|-----------|
| C  | 2.846961  | 1.228869  | 0.446499  |
| C  | 2.403371  | 0.194045  | -0.358975 |
| C  | 1.040299  | -0.010060 | -0.525386 |
| C  | 0.080825  | 0.787345  | 0.097213  |
| C  | 0.567912  | 1.829912  | 0.891099  |
| C  | 1.921830  | 2.053601  | 1.068642  |
| H  | 2.255649  | 2.871919  | 1.694190  |
| H  | -0.157031 | 2.466535  | 1.383158  |
| C  | -1.392453 | 0.570369  | -0.008647 |
| C  | -1.944174 | -0.553477 | 0.625478  |
| C  | -3.337680 | -0.651052 | 0.504854  |
| C  | -4.118941 | 0.267860  | -0.187722 |
| C  | -3.520731 | 1.363829  | -0.789994 |
| C  | -2.148030 | 1.520845  | -0.693784 |
| H  | -1.666407 | 2.373991  | -1.161348 |
| H  | -4.118935 | 2.085764  | -1.332121 |
| H  | -5.192489 | 0.131036  | -0.268059 |
| Br | 0.516201  | -1.435059 | -1.705991 |
| H  | 3.110482  | -0.442473 | -0.873556 |
| H  | 3.909143  | 1.393296  | 0.574316  |
| C  | -4.014873 | -1.858109 | 1.156923  |
| C  | -3.758026 | -3.122494 | 0.339716  |
| C  | -3.632463 | -1.959108 | 2.597798  |
| C  | -3.073945 | -4.247338 | 1.008822  |
| C  | -3.102962 | -3.056756 | 3.147345  |
| H  | -3.814946 | -1.077242 | 3.200843  |
| C  | -2.819466 | -4.221690 | 2.326819  |
| H  | -2.865037 | -5.116977 | 0.397496  |
| H  | -2.867000 | -3.091366 | 4.203849  |
| H  | -2.384565 | -5.094245 | 2.805717  |

|   |           |           |           |
|---|-----------|-----------|-----------|
| H | -5.101478 | -1.708054 | 1.117930  |
| O | -4.131701 | -3.220532 | -0.806482 |
| K | -0.168651 | -2.425812 | 1.483381  |

**E<sub>ortho</sub>-Br<sup>c</sup>**

|    |           |           |           |
|----|-----------|-----------|-----------|
| C  | 1.514581  | -2.315998 | 2.253123  |
| C  | 1.045802  | -2.706610 | 0.947178  |
| C  | -0.186600 | -2.371181 | 0.554698  |
| C  | -1.149973 | -1.645513 | 1.427902  |
| C  | -0.596419 | -1.214965 | 2.775374  |
| C  | 0.756342  | -1.616451 | 3.117666  |
| C  | -1.987407 | -0.585752 | 0.697152  |
| C  | -1.338592 | 0.372892  | -0.097160 |
| C  | -2.103449 | 1.287923  | -0.812911 |
| C  | -3.483062 | 1.244253  | -0.728160 |
| C  | -4.092164 | 0.300869  | 0.092613  |
| C  | -3.387891 | -0.658673 | 0.838365  |
| C  | 0.143185  | 0.488409  | -0.163315 |
| C  | 0.902309  | 0.113842  | -1.271435 |
| C  | 2.280630  | 0.239548  | -1.290780 |
| C  | 2.939286  | 0.750321  | -0.183633 |
| C  | 2.212508  | 1.144148  | 0.927171  |
| C  | 0.834634  | 1.015944  | 0.927291  |
| Br | 0.063366  | -0.644227 | -2.812568 |
| H  | -0.546929 | -2.634460 | -0.432641 |
| H  | 2.716331  | 1.551289  | 1.794506  |
| H  | 0.261351  | 1.328854  | 1.791369  |
| H  | -1.609164 | 2.027227  | -1.431940 |
| H  | -4.077825 | 1.951811  | -1.296948 |
| H  | -5.181490 | 0.313317  | 0.136016  |
| H  | 2.836603  | -0.070898 | -2.164621 |
| H  | 4.017559  | 0.845515  | -0.198950 |
| H  | -1.911534 | -2.395733 | 1.698832  |
| O  | -1.288249 | -0.588269 | 3.576288  |
| H  | 1.712112  | -3.247501 | 0.288717  |
| H  | 1.129397  | -1.306571 | 4.085462  |
| H  | 2.525472  | -2.587608 | 2.537033  |
| K  | -3.877988 | -0.320919 | 3.463016  |

**E<sub>meta</sub>-I**

|   |           |           |          |
|---|-----------|-----------|----------|
| C | -1.648024 | -1.691529 | 1.454340 |
| C | -1.550076 | -0.544467 | 0.685180 |
| C | -0.354912 | -0.238910 | 0.045056 |
| C | 0.773230  | -1.051665 | 0.156820 |
| C | 0.632475  | -2.209658 | 0.927945 |
| C | -0.550711 | -2.530923 | 1.568723 |
| H | -0.615761 | -3.436319 | 2.159167 |

|   |           |           |           |
|---|-----------|-----------|-----------|
| H | 1.494939  | -2.857694 | 1.023703  |
| C | 2.102842  | -0.745214 | -0.448410 |
| C | 2.804573  | 0.362492  | 0.046418  |
| C | 4.047719  | 0.522550  | -0.541029 |
| C | 4.592732  | -0.286912 | -1.526123 |
| C | 3.845829  | -1.363224 | -1.979009 |
| C | 2.594415  | -1.602966 | -1.433345 |
| H | 2.002632  | -2.443920 | -1.779080 |
| H | 4.241012  | -2.011575 | -2.751235 |
| H | 5.574960  | -0.074446 | -1.931216 |
| I | -0.347179 | 1.502822  | -1.173854 |
| H | -2.408598 | 0.102870  | 0.567524  |
| H | -2.581214 | -1.929284 | 1.948697  |
| O | 4.863195  | 1.626563  | -0.194784 |
| C | 4.675737  | 2.205931  | 1.005772  |
| C | 4.410727  | 3.570921  | 1.052812  |
| C | 4.786209  | 1.487631  | 2.198256  |
| C | 4.236470  | 4.208741  | 2.275754  |
| H | 4.338772  | 4.114904  | 0.119953  |
| C | 4.609267  | 2.129307  | 3.411825  |
| H | 4.993961  | 0.427530  | 2.151340  |
| C | 4.321376  | 3.491790  | 3.460871  |
| H | 4.038194  | 5.273487  | 2.299257  |
| H | 4.704871  | 1.564696  | 4.331532  |
| H | 4.195802  | 3.990341  | 4.413407  |
| K | 1.611929  | 2.020275  | 1.886792  |

**E<sub>ortho</sub>-I**

|   |           |           |           |
|---|-----------|-----------|-----------|
| C | -2.282213 | -2.374457 | 0.216318  |
| C | -2.097686 | -1.134024 | -0.369864 |
| C | -0.822383 | -0.592960 | -0.451096 |
| C | 0.289409  | -1.267787 | 0.044863  |
| C | 0.073248  | -2.515215 | 0.629314  |
| C | -1.191707 | -3.067851 | 0.716990  |
| H | -1.326139 | -4.039168 | 1.175968  |
| H | 0.930072  | -3.048456 | 1.021531  |
| C | 1.671514  | -0.728373 | -0.028885 |
| C | 2.220582  | 0.025613  | 1.003798  |
| C | 3.497403  | 0.568761  | 1.037923  |
| C | 4.238441  | 0.284312  | -0.117987 |
| C | 3.756931  | -0.472033 | -1.183619 |
| C | 2.471370  | -0.981371 | -1.138129 |
| H | 2.072658  | -1.566065 | -1.958554 |
| H | 4.381478  | -0.665309 | -2.048943 |
| H | 5.258704  | 0.657417  | -0.204420 |
| I | -0.613057 | 1.300572  | -1.372951 |
| H | -2.944518 | -0.589350 | -0.764046 |

|   |           |           |          |
|---|-----------|-----------|----------|
| H | -3.278023 | -2.794617 | 0.278348 |
| O | 1.366289  | 0.161573  | 2.129975 |
| C | 1.322351  | 1.341917  | 2.763208 |
| C | 1.266789  | 2.561587  | 2.082745 |
| C | 1.312686  | 1.336564  | 4.157305 |
| C | 1.236107  | 3.748037  | 2.795559 |
| H | 1.257073  | 2.557097  | 1.001524 |
| C | 1.281382  | 2.533463  | 4.861659 |
| H | 1.336168  | 0.383166  | 4.669347 |
| C | 1.259235  | 3.747233  | 4.188129 |
| H | 1.183774  | 4.686991  | 2.257555 |
| H | 1.270108  | 2.514337  | 5.944781 |
| H | 1.226848  | 4.679180  | 4.737408 |
| K | 4.239094  | 2.257176  | 3.077153 |

**E<sub>meta-I'</sub>**

|   |           |           |           |
|---|-----------|-----------|-----------|
| C | 1.759160  | 4.374152  | 2.412954  |
| C | 2.024983  | 4.449671  | 0.985999  |
| C | 2.857630  | 3.577767  | 0.409277  |
| C | 3.581750  | 2.505618  | 1.158678  |
| C | 3.315690  | 2.487875  | 2.661015  |
| C | 2.318445  | 3.437799  | 3.195190  |
| C | 3.273372  | 1.144319  | 0.532519  |
| C | 1.933540  | 0.730913  | 0.529249  |
| C | 1.719659  | -0.511253 | -0.084767 |
| C | 2.737205  | -1.287582 | -0.639175 |
| C | 4.042217  | -0.826719 | -0.606282 |
| C | 4.311332  | 0.398515  | -0.013994 |
| C | 0.330586  | -1.056498 | -0.090277 |
| C | -0.729482 | -0.508023 | -0.812767 |
| C | -2.020674 | -1.016400 | -0.729354 |
| C | -2.281443 | -2.106178 | 0.083978  |
| C | -1.245776 | -2.685610 | 0.801101  |
| C | 0.032595  | -2.164819 | 0.708995  |
| I | -0.429418 | 1.126748  | -2.138676 |
| H | 3.037491  | 3.615385  | -0.658979 |
| H | -1.434246 | -3.543231 | 1.434697  |
| H | 0.841800  | -2.606756 | 1.277104  |
| H | 2.511792  | -2.244618 | -1.099254 |
| H | 4.843570  | -1.416180 | -1.034398 |
| H | 5.333344  | 0.762185  | 0.023844  |
| H | -2.816761 | -0.573125 | -1.312194 |
| H | -3.286632 | -2.503280 | 0.144465  |
| O | 3.926663  | 1.752662  | 3.402114  |
| H | 1.533960  | 5.218656  | 0.402348  |
| H | 2.125153  | 3.384823  | 4.259882  |
| H | 1.083891  | 5.104534  | 2.849275  |

|   |           |          |          |
|---|-----------|----------|----------|
| H | 4.657071  | 2.699095 | 1.056925 |
| K | -0.308346 | 1.989019 | 1.423570 |

**E<sub>ortho-I'</sub>**

|   |           |           |           |
|---|-----------|-----------|-----------|
| C | -2.208991 | -2.966804 | -0.702641 |
| C | -1.732358 | -2.187478 | -1.741704 |
| C | -0.594075 | -1.414171 | -1.558385 |
| C | 0.093528  | -1.391241 | -0.348358 |
| C | -0.410082 | -2.196158 | 0.676930  |
| C | -1.541698 | -2.972389 | 0.512061  |
| H | -1.901055 | -3.582967 | 1.330394  |
| H | 0.119634  | -2.202793 | 1.621319  |
| C | 1.311931  | -0.581360 | -0.079608 |
| C | 1.280435  | 0.587531  | 0.697579  |
| C | 2.423840  | 1.343759  | 1.037556  |
| C | 3.623551  | 0.800563  | 0.544996  |
| C | 3.694202  | -0.339384 | -0.256764 |
| C | 2.535536  | -1.028803 | -0.576813 |
| H | 2.572614  | -1.924329 | -1.185747 |
| H | 4.649557  | -0.703328 | -0.622924 |
| H | 4.564993  | 1.293348  | 0.787823  |
| I | 0.041645  | -0.271484 | -3.229878 |
| H | -2.247386 | -2.180839 | -2.692334 |
| H | -3.097744 | -3.567111 | -0.847478 |
| C | -0.049391 | 1.123189  | 1.226917  |
| C | -0.280171 | 2.559827  | 0.791212  |
| C | -0.163738 | 0.890655  | 2.697669  |
| C | -0.733156 | 3.517362  | 1.786962  |
| C | -0.549564 | 1.835704  | 3.555030  |
| H | 0.085623  | -0.103882 | 3.047416  |
| C | -0.849438 | 3.167967  | 3.078503  |
| H | -0.931607 | 4.524441  | 1.443852  |
| H | -0.622721 | 1.630515  | 4.614820  |
| H | -1.163741 | 3.911353  | 3.802984  |
| H | -0.885972 | 0.577722  | 0.762939  |
| O | -0.141268 | 2.886608  | -0.383053 |
| K | 2.075205  | 2.341616  | -1.582128 |

**KOPh**

|   |           |           |           |
|---|-----------|-----------|-----------|
| C | 0.068315  | 1.348671  | -0.000036 |
| C | -0.831342 | 0.259634  | -0.000016 |
| C | -0.252481 | -1.028856 | 0.000013  |
| C | 1.119451  | -1.207636 | 0.000038  |
| C | 1.984606  | -0.120278 | 0.000028  |
| C | 1.438555  | 1.157497  | -0.000012 |
| O | -2.119325 | 0.433446  | -0.000038 |
| K | -4.380863 | 0.739206  | 0.000089  |

|   |           |           |           |
|---|-----------|-----------|-----------|
| H | -0.347091 | 2.350849  | -0.000068 |
| H | 2.094437  | 2.021791  | -0.000025 |
| H | 3.057289  | -0.265005 | 0.000047  |
| H | 1.522815  | -2.214852 | 0.000064  |
| H | -0.918578 | -1.885154 | 0.000015  |



## Post-Functionalization:

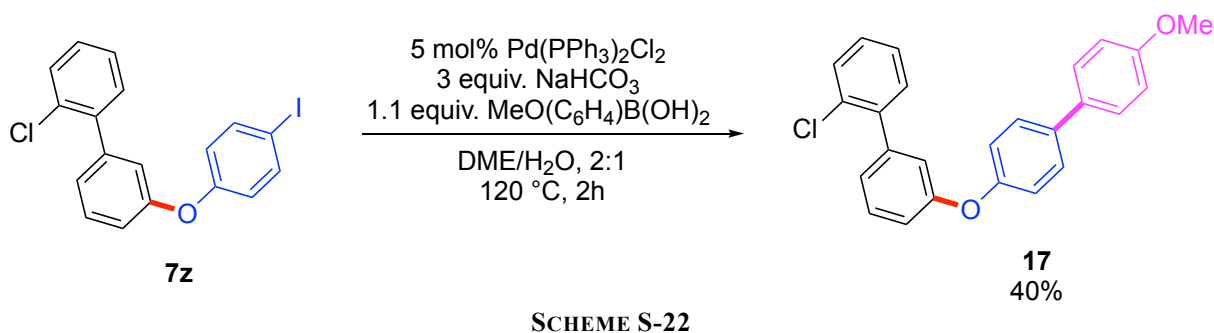

### 2-chloro-3'-((4'-methoxy-[1,1'-biphenyl]-4-yl)oxy)-1,1'-biphenyl **17**

A solution of **7z** (49 mg, 0.12 mmol, 1 equiv.), 4-methoxyphenylboronic acid (20 mg, 0.13 mmol, 1.1 equiv.), Pd(PPh<sub>3</sub>)<sub>2</sub>Cl<sub>2</sub> (4 mg, 6 μmol, 5 mol%), and NaHCO<sub>3</sub> (30 mg, 0.36 mmol, 3 equiv.) in DME (500 μL) was stirred at room temperature for 5 min. Then, H<sub>2</sub>O (240 μL) was added. The resulting mixture was sealed and stirred at 120 °C for 2 hours. After being cooled to room temperature, the mixture was extracted with EtOAc. The extracts were combined, dried over MgSO<sub>4</sub>, and filtered. After removal of volatile components from the filtrate, the resulting crude product was purified by preparative TLC (Cy/EtOAc 9:1) yielding **17** in 40% (18.5 mg, 0.048 mmol) as colorless oil.

**<sup>1</sup>H NMR** (400 MHz, CDCl<sub>3</sub>) δ 7.45 – 7.41 (m, 4H), 7.39 – 7.36 (m, 1H), 7.35 – 7.31 (m, 1H), 7.28 – 7.19 (m, 3H), 7.10 (dt, *J* = 7.7, 1.2 Hz, 1H), 7.07 – 7.06 (m, 1H), 7.05 – 7.02 (m, 2H), 6.99 (ddd, *J* = 8.2, 2.5, 1.0 Hz, 1H), 6.91 – 6.88 (m, 2H), 3.77 (s, 3H). **<sup>13</sup>C NMR** (101 MHz, CDCl<sub>3</sub>) δ 159.0, 157.0, 156.1, 141.1, 139.8, 136.1, 133.1, 132.4, 131.2, 130.0, 129.4, 128.7, 128.0 (2C), 127.9 (2C), 126.8, 124.3, 119.9, 119.2 (2C), 117.9, 114.2 (2C), 55.3. **HRMS (APCI)**: *m/z* [M]<sup>+</sup> calcd for C<sub>25</sub>H<sub>19</sub>ClO<sub>2</sub><sup>+</sup>: 386.1068; found: 386.1024.

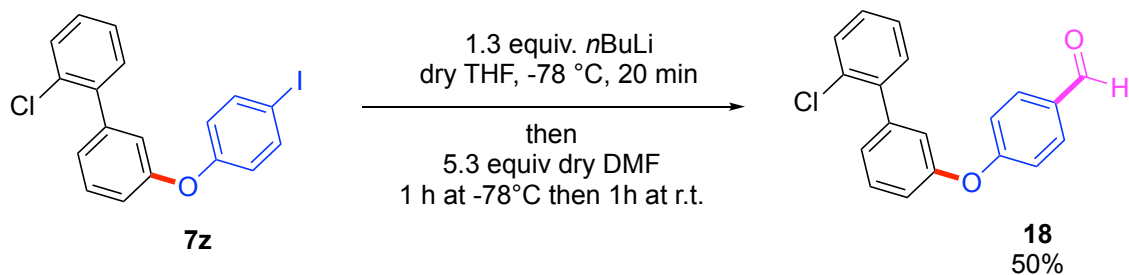

SCHEME S-23

#### 4-((2'-chloro-[1,1'-biphenyl]-3-yl)oxy)benzaldehyde **18**

To a solution of **7z** (50 mg, 0.12 mmol, 1 equiv.) in freshly distilled THF (1.3 mL, 0.1 M) at -78 °C a 1.6 M solution of *n*BuLi in hexanes (100  $\mu$ L, 0.16 mmol, 1.3 equiv.) was added dropwise. The resulting solution was stirred for 30 min at -78 °C. Then dry DMF (50  $\mu$ L, 0.65 mmol, 5.3 equiv.) was added dropwise. The solution was stirred at -78 °C for one hour then the cold bath was removed and the resulting mixture was stirred for 1h. The reaction was quenched with NaHCO<sub>3</sub> and water, then extracted with EtOAc. The organic phase was dried, filtered and concentrated. The crude was purified by preparative TLC (Cy:EtOAc 9:1) yielding **18** in 50% as colorless oil (18.5 mg, 0.06 mmol).

**<sup>1</sup>H NMR** (400 MHz, CDCl<sub>3</sub>)  $\delta$  9.93 (s, 1H), 7.87 (d, *J* = 8.8 Hz, 2H), 7.50 – 7.46 (m, 2H), 7.36 – 7.28 (m, 4H), 7.19 (t, *J* = 2.0 Hz, 1H), 7.15 – 7.10 (m, 3H). **<sup>13</sup>C NMR** (101 MHz, CDCl<sub>3</sub>)  $\delta$  190.8, 163.1, 154.8, 141.5, 139.4, 132.4, 132.0 (2C), 131.4, 131.2, 130.1, 129.9, 129.0, 127.0, 126.0, 121.5, 119.5, 117.8 (2C). **HRMS (APCI)**: *m/z* [M+H]<sup>+</sup> calcd for C<sub>19</sub>H<sub>14</sub>ClO<sub>2</sub><sup>+</sup>: 309.0677; found: 309.0673.

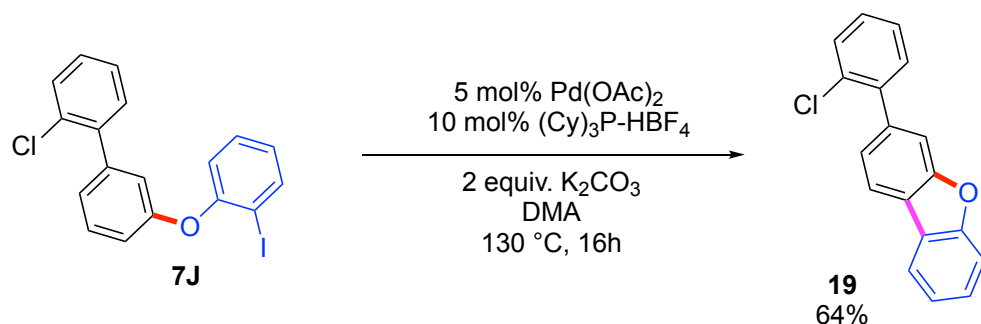

SCHEME S-24

### 3-(2-chlorophenyl)dibenzo[b,d]furan **19**

To an oven dried 7 mL vial equipped with a magnetic stirrer was charged with **7J** (50 mg, 0.12 mmol, 1 equiv) followed by Pd(OAc)<sub>2</sub> (1.4 mg, 6.1 μmol, 5 mol%), (Cy)<sub>3</sub>P-HBF<sub>4</sub> (4.5 mg, 12 μmol, 10 mol%) and K<sub>2</sub>CO<sub>3</sub> (34 mg, 0.25 mmol, 2 equiv). The vial was purged with argon, then degassed DMA (500 μL, M 0.24) was added. The resulting mixture was heated to 130 °C overnight. The crude mixture was then loaded directly onto silica and purified by flash chromatography (Cy/EtOAc 9:1) yielding **19** in 64% as colorless oil (22 mg, 0.079 mmol)

**<sup>1</sup>H NMR** (400 MHz, CDCl<sub>3</sub>) δ 7.92 – 7.88 (m, 2H), 7.58 (d, *J* = 1.1 Hz, 1H), 7.50 (d, *J* = 8.2 Hz, 1H), 7.44 – 7.40 (m, 1H), 7.39 – 7.36 (m, 1H), 7.35 – 7.33 (m, 2H), 7.29 – 7.20 (m, 3H). **<sup>13</sup>C NMR** (101 MHz, CDCl<sub>3</sub>) δ 156.6, 155.9, 140.3, 138.5, 132.6, 131.6, 130.1, 128.7, 127.3, 126.9, 124.4, 124.0, 123.6, 122.8, 120.7, 120.1, 112.8, 111.7. **HRMS (APCI):** *m/z* [M]<sup>+</sup> calcd for C<sub>18</sub>H<sub>11</sub>ClO<sup>+</sup>: 278.0493; found: 278.0507.

X-Ray suitable crystals of **19** were obtained through slow evaporation of acetone (Ellipsoid probability at 50%). CCDC 2176958

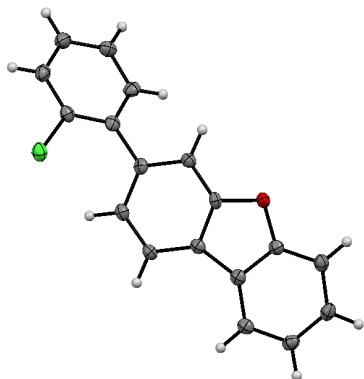

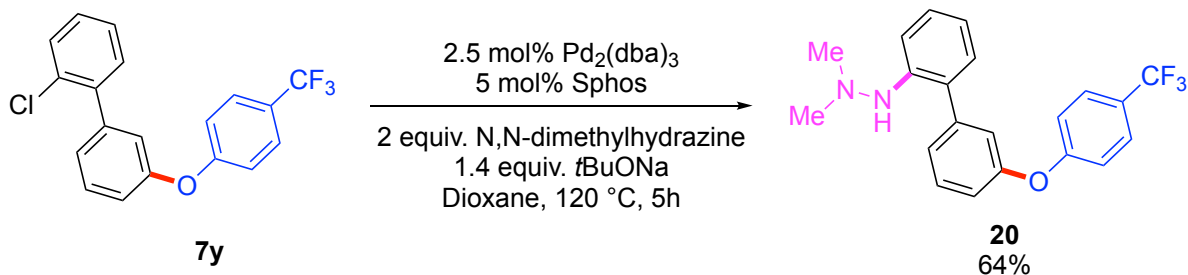

SCHEME S-25

### 1,1-dimethyl-2-(3'-(4-(trifluoromethyl)phenoxy)-[1,1'-biphenyl]-2-yl)hydrazine **20**

A 7 mL reaction tube was charged with  $\text{Pd}_2(\text{dba})_3$  (2.3 mg, 2.5  $\mu\text{mol}$ , 2.5 mol%) and Sphos (2.1 mg, 5  $\mu\text{mol}$ , 5 mol%) followed by dioxane (200  $\mu\text{L}$ ). The resulting mixture was stirred at room temperature under argon for ten minutes. The compound **7y** (34.9 mg, 0.1 mmol) in 200  $\mu\text{L}$  of dioxane, N,N-dimethylhydrazine (15  $\mu\text{L}$ , 0.2 mmol, 2 equiv.) and  $t\text{BuONa}$  (13.5 mg, 1.4 mmol, 1.4 equiv.) were then added. The reaction mixture was stirred at 120  $^\circ\text{C}$  under argon for 5 h. After cooling to room temperature, the reaction mixture was diluted with ethyl acetate, filtered and concentrated under reduced pressure. The residue was purified by preparative TLC (silica gel, Cy/EtOAc 10:1) to afford the product **20** in 64% as colorless oil (24 mg, 0.064 mmol).

$^1\text{H NMR}$  (400 MHz,  $\text{CDCl}_3$ )  $\delta$  7.61 – 7.59 (m, 2H), 7.46 (t,  $J = 7.9$  Hz, 1H), 7.33 (dd,  $J = 8.2, 1.5$  Hz, 1H), 7.30 – 7.27 (m, 1H), 7.23 (ddd,  $J = 7.6, 1.6, 1.0$  Hz, 1H), 7.13 – 7.04 (m, 5H), 6.84 (td,  $J = 7.3, 1.5$  Hz, 1H), 4.46 (s, 1H), 2.47 (s, 6H).  $^{13}\text{C NMR}$  (101 MHz,  $\text{CDCl}_3$ )  $\delta$  160.1 (m), 156.3, 144.2, 141.2, 130.4, 130.0, 129.1, 127.2 (q,  $J = 3.9$  Hz, 2C), 125.7, 125.1, 125.2 (d,  $J = 33.0$  Hz), 124.1 (q,  $J = 271.3$  Hz), 120.3, 118.8, 118.3, 118.3 (2C), 113.9, 47.6 (2C).  $^{19}\text{F NMR}$  (377 MHz,  $\text{CDCl}_3$ )  $\delta$  -61.8. **HRMS (ESI)**:  $m/z$   $[\text{M}+\text{H}]^+$  calcd for  $\text{C}_{21}\text{H}_{20}\text{F}_3\text{N}_2\text{O}^+$ : 373.1522; found: 373.1505.

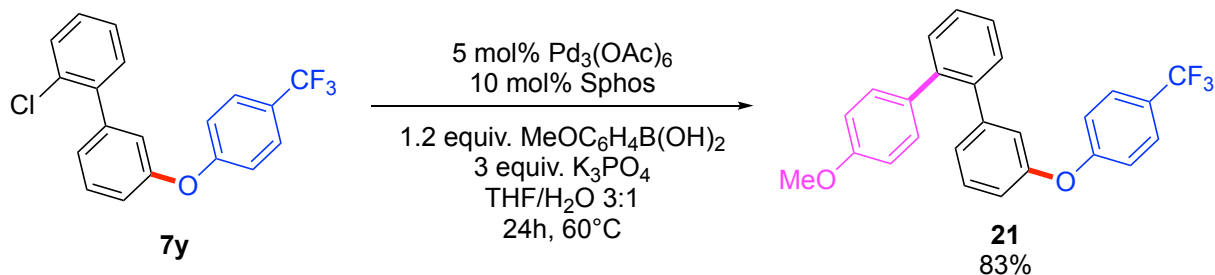

SCHEME S-26

### 4''-methoxy-3-(4-(trifluoromethyl)phenoxy)-1,1':2',1''-terphenyl **21**

A 5 mL test tube was charged with Pd<sub>3</sub>(OAc)<sub>6</sub> (4.1 mg, 0.018 mmol, 5 mol%) and S-Phos (14.8 mg, 0.036 mmol, 10 mol%), The vial was evacuated and back refilled with Ar three times. Then a mixture of THF-H<sub>2</sub>O (3/1, 1 mL) was added. The resulting mixture was stirred for 10 min to generate the active catalyst solution. A 5 mL reaction tube was charged with **7y** (42 mg, 0.12 mmol, 1 equiv.), K<sub>3</sub>PO<sub>4</sub> (76.4 mg, 0.36 mmol, 3 equiv), and 4-methoxyphenylboronic acid (21.8 mg, 0.144 mmol, 1.2 equiv), purged and filled with Ar three times. The active catalyst solution (0.33 mL) and the mixture of THF-H<sub>2</sub>O (3/1, 0.9 mL) was added. The reaction mixture was stirred at 60 °C for 24 h. The crude mixture was diluted in DCM (2 mL), filtered through celite and washed with DCM (3x2 mL). After evaporating the solvent, the residue was purified by preparative TLC (Cyclohexane/ethyl acetate 10:1) to afford product **21** in 83% as colorless oil (42 mg, 0.1 mmol).

**<sup>1</sup>H NMR** (500 MHz, CDCl<sub>3</sub>) δ 7.48 (dd, *J* = 9.1, 0.7 Hz, 2H), 7.43 – 7.39 (m, 4H), 7.37 (d, *J* = 7.9 Hz, 1H), 7.18 (dt, *J* = 7.6, 1.1 Hz, 1H), 7.07 (d, *J* = 8.9 Hz, 2H), 6.96 (ddd, *J* = 8.2, 2.5, 1.1 Hz, 1H), 6.82 (d, *J* = 8.9 Hz, 2H), 6.75 (dd, *J* = 9.2, 0.8 Hz, 2H), 6.70 (dd, *J* = 2.5, 1.4 Hz, 1H), 3.82 (s, 3H). **<sup>13</sup>C NMR** (101 MHz, CDCl<sub>3</sub>) δ 160.2 (d, *J* = 1.5 Hz), 158.4, 154.7, 143.9, 140.2, 139.5, 133.6, 131.0 (2C), 130.6, 130.3, 130.0, 127.9, 127.2, 126.9 (q, *J* = 3.7 Hz, 2C), 125.8, 124.6 (d, *J* = 271.4 Hz), 124.4 (q, *J* = 32.6 Hz), 121.7, 118.4, 117.4 (2C), 113.5 (2C), 55.0. **<sup>19</sup>F NMR** (377 MHz, CDCl<sub>3</sub>) δ -61.7. **HRMS (APCI):** *m/z* [M]<sup>+</sup> calcd for C<sub>26</sub>H<sub>19</sub>F<sub>3</sub>O<sub>2</sub><sup>+</sup>: 420.1332; found: 420.1353.

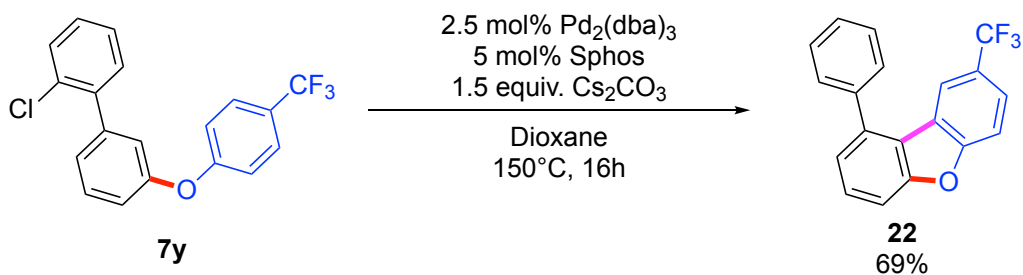

SCHEME S-27

### 1-phenyl-8-(trifluoromethyl)dibenzo[b,d]furan **22**

A 5 mL test tube was charged with  $\text{Pd}_2(\text{dba})_3$  (2.8 mg, 0.003 mmol, 2.5 mol%) and S-Phos (2.5 mg, 0.006 mmol, 5 mol%). The vial was evacuated and back filled with Ar three times. Then dioxane (0.2 mL) was added. The mixture of was stirred for 10 min at room temperature. In the meantime, **7y** (42 mg, 0.12 mmol, 1 equiv.) was dissolved in dioxane (0.2 mL), the resulting solution was added to the catalytic reaction tube followed by  $\text{Cs}_2\text{CO}_3$  (59 mg, 0.18 mmol, 1.5 equiv.). The resulting mixture was allowed to stir at  $150^\circ\text{C}$  for 16 hours. After cooling at room temperature, the crude was filtered, concentrated and purified through prep-TLC (Cy 100%) affording **22** (26 mg, 0.083 mmol) as white powder in 69% yield.

$^1\text{H NMR}$  (400 MHz,  $\text{CDCl}_3$ )  $\delta$  7.70 (brs, 1H), 7.57 (dd,  $J = 8.7, 1.8$  Hz, 1H), 7.55 – 7.42 (m, 8H), 7.22 (dd,  $J = 7.1, 1.3$  Hz, 1H).  $^{13}\text{C NMR}$  (101 MHz,  $\text{CDCl}_3$ )  $\delta$  157.8 - 157.7 (m), 157.0, 139.1, 138.3, 128.7 (4C), 128.4, 128.0, 124.9 (q,  $J = 32.3$  Hz), 124.5, 124.4 (q,  $J = 271.8$  Hz), 124.1, 124.1 - 124.0 (m), 120.9, 119.8 (q,  $J = 4.3$  Hz), 119.9, 110.7.  $^{19}\text{F NMR}$  (377 MHz,  $\text{CDCl}_3$ )  $\delta$  -61.0. **HRMS (APCI)**:  $m/z$   $[\text{M}]^+$  calcd for  $\text{C}_{19}\text{H}_{11}\text{F}_3\text{O}^+$ : 312.0757; found: 312.0732.

X-Ray suitable crystals of **22** were obtained through slow evaporation of chloroform (Ellipsoid probability at 50%) CCDC 2176959

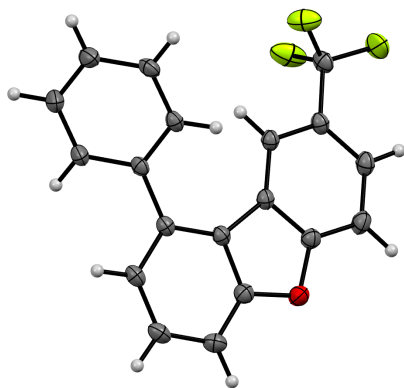

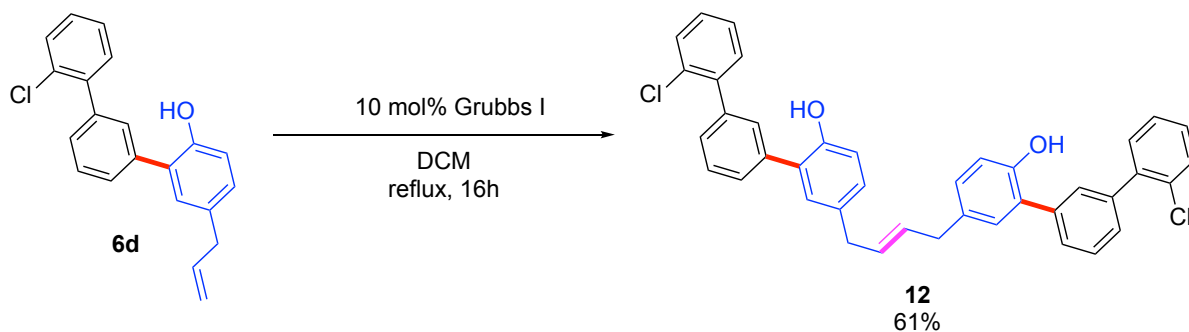

SCHEME S-28

**(E)-5,5'''-(but-2-ene-1,4-diyl)bis(2''-chloro-[1,1':3',1''-terphenyl]-2-ol) **12****

A 5 mL test tube was charged with **6d** (48 mg, 0.15 mmol, 1 equiv.) and Grubbs I catalyst (13 mg, 0.014 mmol, 10 mol%). The vial was evacuated and back refilled with Ar three times. Then DCM (0.75 mL, 0.2 M) was added. The resulting mixture was heated at reflux for 16 hours. The solvent was removed under reduced pressure and purified by prep-TLC (Cy:EtOAc 4:1) to afford **12** as pale yellow oil in 61% yield. (28 mg, 0.046 mmol)

<sup>1</sup>H NMR (400 MHz, CDCl<sub>3</sub>) δ 7.72 – 7.70 (m, 2H), 7.68 – 7.66 (m, 2H), 7.64 – 7.59 (m, 6H), 7.53 – 7.42 (m, 6H), 7.26 (d, *J* = 2.2 Hz, 2H), 7.23 (dd, *J* = 8.2, 2.3 Hz, 2H), 7.03 (d, *J* = 8.3 Hz, 2H), 5.84 (m, 2H), 5.35 (s, 2H), 3.49 – 3.48 (m, 4H). <sup>13</sup>C NMR (101 MHz, CDCl<sub>3</sub>) δ 150.7, 140.2, 139.9, 137.0, 133.1, 132.4, 131.3, 130.5, 130.2, 130.1, 130.0, 129.2, 129.0, 128.8, 128.8, 128.3, 127.6, 126.9, 115.9, 38.1. HRMS (APCI): *m/z* [M]<sup>+</sup> calcd for C<sub>40</sub>H<sub>30</sub>Cl<sub>2</sub>O<sub>2</sub><sup>+</sup>: 612.1617; found: 612.1622.

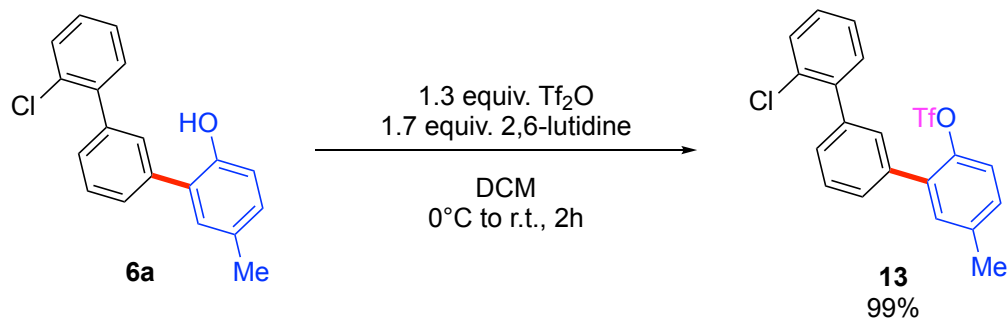

SCHEME S-29

### 2''-chloro-5-methyl-[1,1':3',1''-terphenyl]-2-yl trifluoromethanesulfonate **13**

To a solution of **6a** (59 mg, 0.2 mmol, 1 equiv.) in dry CH<sub>2</sub>Cl<sub>2</sub> (1 mL), 2,6-lutidine (40 μL, 0.34 mmol, 1.7 equiv.) was added. Then trifluoromethanesulfonic anhydride (43 μL, 0.26 mmol, 1.3 equiv.) was added dropwise at 0 °C followed by CH<sub>2</sub>Cl<sub>2</sub> (200 μL). The solution was allowed to warm to room temperature and stirring was continued for 2 hours. The reaction was quenched with H<sub>2</sub>O (1 mL) and the mixture was extracted with CH<sub>2</sub>Cl<sub>2</sub> (1 mL x times). The organic layer was concentrated under reduced pressure. The residue was purified *via* filtration on silica gel using CH<sub>2</sub>Cl<sub>2</sub> to afford **13** (85 mg, 0.2 mmol) as a colorless oil in 99% yield.

**<sup>1</sup>H NMR** (400 MHz, CDCl<sub>3</sub>) δ 7.46 – 7.39 (m, 5H), 7.34 – 7.32 (m, 1H), 7.28 – 7.19 (m, 4H), 7.16 – 7.13 (m, 1H), 2.34 (s, 3H). **<sup>13</sup>C NMR** (101 MHz, CDCl<sub>3</sub>) δ 144.8, 140.0, 139.6, 138.6, 135.6, 134.8, 132.5, 132.5, 131.4, 130.4, 129.9, 129.6, 129.3, 128.7, 128.5, 128.1, 126.9, 121.8, 20.9. **HRMS (APCI)**: m/z [M]<sup>+</sup> calcd for C<sub>20</sub>H<sub>14</sub>ClF<sub>3</sub>O<sub>3</sub>S<sup>+</sup>: 426.0299; found: 426.0298.



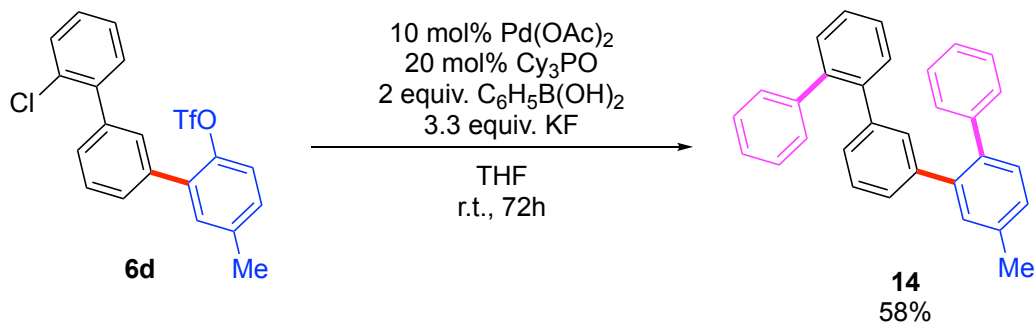

SCHEME S-30

#### 4'-methyl-1,1':2',1'':3'',1'''-quinquephenyl **14**

A 5 mL reaction tube was charged with Pd(OAc)<sub>2</sub> (2.3 mg, 0.01 mmol, 10 mol%), Cy<sub>3</sub>P (5.6 mg, 0.02 mmol, 20 mol%), phenylboronic acid (24.3 mg, 0.2 mmol, 2 equiv) and KF (19.1 mg, 0.33 mmol, 3.3 equiv). The tube was evacuated and backfilled with Argon three times. Then a solution of the **6d** (42.7 mg, 0.1 mmol, 1 equiv.) in THF (0.2 mL, 0.5 M) was added by syringe. The resulting mixture was stirred at room temperature for 72 hours. The reaction was monitored by TLC and GC-MS. The crude was filtered through a pad of celite and washing with EtOAc (2 mL x 2 times) then concentrated *in vacuo*. The residue was purified by prep-TLC (Cy:DCM 3:1) to afford **14** as colorless oil in 58% yield. (23 mg, 0.058 mmol).

**<sup>1</sup>H NMR** (400 MHz, CDCl<sub>3</sub>) δ 7.42 – 7.35 (m, 3H), 7.31 – 7.19 (m, 9H), 7.14 – 7.06 (m, 5H), 6.99 (d, *J* = 7.4 Hz, 1H), 6.95 – 6.93 (m, 2H), 6.87 (dt, *J* = 7.4, 1.6 Hz, 1H), 2.40 (s, 3H). **<sup>13</sup>C NMR** (101 MHz, CDCl<sub>3</sub>) δ 141.7, 141.5, 141.2, 141.1, 140.6, 140.5, 140.2, 137.7, 137.1, 131.5, 131.3, 130.5, 130.5, 130.3, 130.0 (2C), 130.0 (2C), 128.1, 128.1, 127.9, 127.9 (2C), 127.8 (2C), 127.4 (2C), 127.2, 126.4, 126.2, 21.0. **HRMS (APCI)**: *m/z* [M]<sup>+</sup> calcd for C<sub>31</sub>H<sub>24</sub><sup>+</sup>: 396.1873; found: 396.1902.

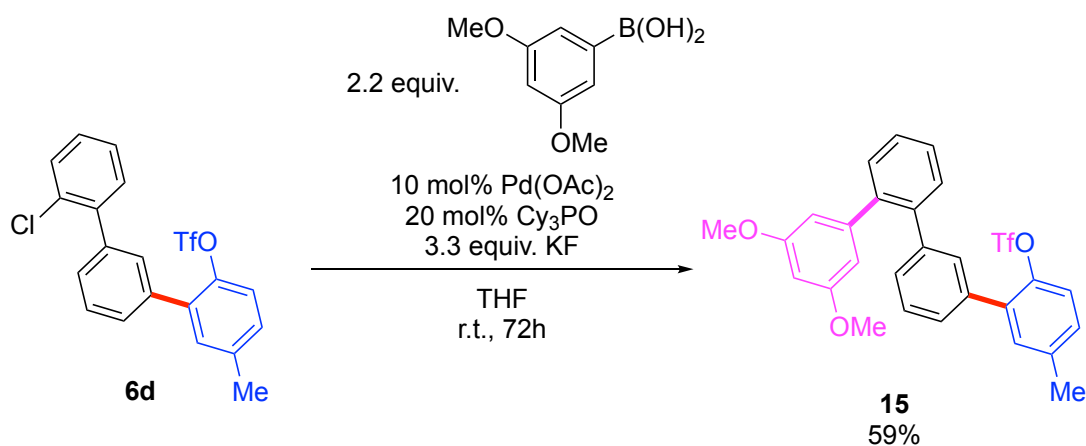

SCHEME S-31

### 3,5-dimethoxy-5'''-methyl-[1,1':2',1'':3'',1'''-quaterphenyl]-2'''-yl trifluoromethanesulfonate 15

A 5 mL reaction tube was charged with Pd(OAc)<sub>2</sub> (11 mg, 0.05 mmol, 10 mol%), Cy<sub>3</sub>P (28 mg, 0.1 mmol, 20 mol%), 3,5-dimethoxyphenylboronic acid (218 mg, 1.2 mmol, 2.2 equiv) and KF (96 mg, 1.65 mmol, 3.3 equiv). The tube was evacuated and backfilled with Argon three times. Then a solution of the **6d** (213 mg, 0.5 mmol, 1 equiv.) in THF (1 mL, 0.5 M) was added by syringe. The resulting mixture was stirred at room temperature for 72 hours. The reaction was monitored by TLC and GC-MS. The crude was filtered through a pad of celite and washing with EtOAc (2 mL x 2 times) then concentrated *in vacuo*. The residue was purified by prep-TLC (Cy:DCM 3:1) to afford **15** as colorless oil in 59% yield. (155 mg, 0.29 mmol).

<sup>1</sup>H NMR (400 MHz, CDCl<sub>3</sub>) δ 7.59 – 7.56 (m, 1H), 7.54 – 7.51 (m, 1H), 7.50 – 7.46 (m, 2H), 7.41 – 7.38 (m, 2H), 7.37 – 7.31 (m, 2H), 7.27 (d, *J* = 8.1 Hz, 1H), 7.22 – 7.19 (m, 1H), 6.45 – 6.42 (m, 3H), 6.95 (d, *J* = 2.2 Hz, 1H), 3.68 (s, 6H), 2.42 (s, 3H). <sup>13</sup>C NMR (101 MHz, CDCl<sub>3</sub>) δ 160.3 (2C), 144.7, 143.6, 141.7, 140.6, 139.8, 138.6, 135.3, 134.8, 132.6, 130.8, 130.4, 130.3, 129.3 (2C), 127.9, 127.8, 127.6, 127.4, 121.6, 108.1 (2C), 99.2, 55.1 (2C), 20.7. <sup>19</sup>F NMR (377 MHz, CDCl<sub>3</sub>) δ -73.9. HRMS (ESI): *m/z* [M+H]<sup>+</sup> calcd for C<sub>28</sub>H<sub>24</sub>F<sub>3</sub>O<sub>5</sub>S<sup>+</sup>: 529.1291; found: 529.1290.

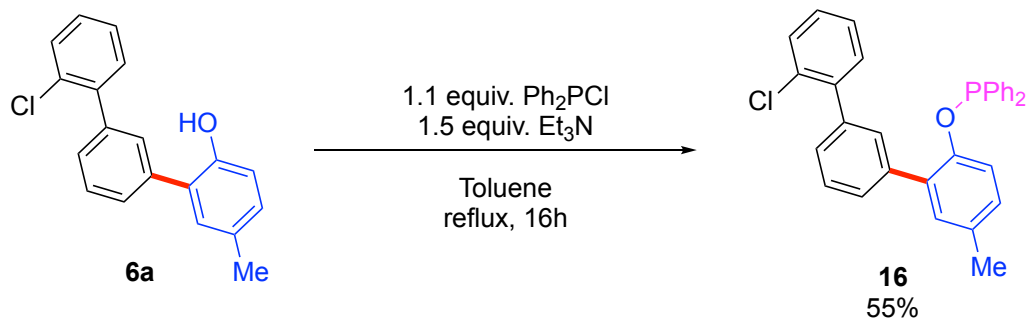

SCHEME S-32

**((2'-chloro-5-methyl-[1,1':3',1''-terphenyl]-2-yl)oxy)diphenylphosphane 16**

A Schlenk tube under an atmosphere of nitrogen was charged with **6a** (30 mg, 0.1 mmol, 1 equiv.), chlorodiphenylphosphine (19  $\mu$ L, 0.11 mmol, 1.1 equiv.), toluene (0.3 mL, 0.34 M) and triethylamine (21  $\mu$ L, 0.15 mmol, 1.5 equiv.). The resultant mixture was then heated at reflux temperature overnight, allowed to cool to room temperature and the precipitated Et<sub>3</sub>NHCl removed by filtration through a pad of Celite. The precipitate was washed with toluene (2  $\times$  10 mL) and the combined organic fractions were then evaporated, the crude product was purified through prep-TLC (Cy:EtOAc 2:1) yielding **16** (30 mg, 0.063 mmol) as colorless oil in 55% yield.

<sup>1</sup>H NMR (400 MHz, CDCl<sub>3</sub>)  $\delta$  7.54 – 7.41 (m, 9H), 7.39 – 7.33 (m, 3H), 7.28 – 7.19 (m, 7H), 7.10 – 7.09 (m, 1H), 7.00 (ddd,  $J$  = 8.3, 2.4, 0.8 Hz, 1H), 2.26 (s, 3H). <sup>13</sup>C NMR (101 MHz, CDCl<sub>3</sub>)  $\delta$  145.8 (d,  $J$  = 8.2 Hz), 140.2, 139.1, 137.9, 134.3, 132.8 (d,  $J$  = 5.7 Hz), 132.5, 132.1 (d,  $J$  = 2.9 Hz), 131.7 (d,  $J$  = 10.4 Hz, 2C), 131.5, 131.4, 131.4, 130.6, 130.0, 130.0, 129.3, 128.9, 128.6, 128.4, 128.3 (d,  $J$  = 13.4 Hz, 2C), 127.7, 126.9, 121.2 (d,  $J$  = 3.5 Hz), 20.7. <sup>31</sup>P NMR (162 MHz, CDCl<sub>3</sub>)  $\delta$  30.8.

## Crystallographic data

## 2a-BF<sub>4</sub>

Table 1. Crystal data and structure refinement for 2a-BF<sub>4</sub>.

|                                 |                                                                                                                   |
|---------------------------------|-------------------------------------------------------------------------------------------------------------------|
| Identification code             | efcmla_a                                                                                                          |
| Empirical formula               | C12 H8 B Cl F4                                                                                                    |
| Formula weight                  | 274.44                                                                                                            |
| Temperature                     | 120(2) K                                                                                                          |
| Wavelength                      | 0.71073 Å                                                                                                         |
| Crystal system, space group     | Monoclinic, P 21/c                                                                                                |
| Unit cell dimensions            | a = 11.1512(4) Å alpha = 90 deg.<br>b = 16.2741(7) Å beta = 113.4590(14) deg.<br>c = 13.1460(6) Å gamma = 90 deg. |
| Volume                          | 2188.49(16) Å <sup>3</sup>                                                                                        |
| Z, Calculated density           | 8, 1.666 Mg/m <sup>3</sup>                                                                                        |
| Absorption coefficient          | 0.378 mm <sup>-1</sup>                                                                                            |
| F(000)                          | 1104                                                                                                              |
| Crystal size                    | 0.150 x 0.100 x 0.100 mm                                                                                          |
| Theta range for data collection | 1.991 to 28.804 deg.                                                                                              |
| Limiting indices                | -14 ≤ h ≤ 15, -21 ≤ k ≤ 22, -17 ≤ l ≤ 17                                                                          |
| Reflections collected / unique  | 55828 / 5700 [R(int) = 0.0442]                                                                                    |
| Completeness to theta = 25.242  | 100.0 %                                                                                                           |
| Absorption correction           | Semi-empirical from equivalents                                                                                   |
| Max. and min. transmission      | 0.7458 and 0.6965                                                                                                 |
| Refinement method               | Full-matrix least-squares on F <sup>2</sup>                                                                       |
| Data / restraints / parameters  | 5700 / 0 / 325                                                                                                    |

Goodness-of-fit on  $F^2$  1.008

Final R indices [ $I > 2\sigma(I)$ ]  $R1 = 0.0319$ ,  $wR2 = 0.0786$

R indices (all data)  $R1 = 0.0420$ ,  $wR2 = 0.0862$

Extinction coefficient n/a

Largest diff. peak and hole 0.619 and -0.500 e. $\text{\AA}^{-3}$

Table 2. Atomic coordinates ( $\times 10^4$ ) and equivalent isotropic displacement parameters ( $\text{\AA}^2 \times 10^3$ ) for *efcmla\_a*.

$U(\text{eq})$  is defined as one third of the trace of the orthogonalized  $U_{ij}$  tensor.

---

|       | x       | y       | z        | $U(\text{eq})$ |
|-------|---------|---------|----------|----------------|
| Cl(1) | 1612(1) | 3457(1) | 5375(1)  | 19(1)          |
| C(1)  | 2431(1) | 3254(1) | 4485(1)  | 18(1)          |
| C(2)  | 2946(1) | 3860(1) | 4052(1)  | 21(1)          |
| C(3)  | 3559(1) | 3579(1) | 3384(1)  | 22(1)          |
| C(4)  | 3635(1) | 2745(1) | 3185(1)  | 22(1)          |
| C(5)  | 3095(1) | 2156(1) | 3636(1)  | 20(1)          |
| C(6)  | 2473(1) | 2413(1) | 4315(1)  | 18(1)          |
| C(7)  | 1879(1) | 1927(1) | 4913(1)  | 18(1)          |
| C(8)  | 1350(1) | 2391(1) | 5516(1)  | 18(1)          |
| C(9)  | 713(1)  | 2091(1) | 6144(1)  | 21(1)          |
| C(10) | 643(2)  | 1239(1) | 6182(1)  | 24(1)          |
| C(11) | 1187(2) | 744(1)  | 5617(1)  | 25(1)          |
| C(12) | 1787(2) | 1075(1) | 4971(1)  | 23(1)          |
| Cl(2) | 6831(1) | 1441(1) | 10158(1) | 19(1)          |
| C(13) | 7583(1) | 1858(1) | 9306(1)  | 18(1)          |
| C(14) | 8195(1) | 1380(1) | 8796(1)  | 21(1)          |
| C(15) | 8745(1) | 1819(1) | 8179(1)  | 22(1)          |
| C(16) | 8662(1) | 2671(1) | 8100(1)  | 22(1)          |
| C(17) | 8019(1) | 3122(1) | 8623(1)  | 20(1)          |
| C(18) | 7463(1) | 2708(1) | 9257(1)  | 18(1)          |
| C(19) | 6798(1) | 3034(1) | 9918(1)  | 18(1)          |
| C(20) | 6387(1) | 2435(1) | 10461(1) | 18(1)          |
| C(21) | 5727(1) | 2561(1) | 11133(1) | 20(1)          |
| C(22) | 5485(2) | 3381(1) | 11284(1) | 22(1)          |
| C(23) | 5888(2) | 4012(1) | 10776(1) | 24(1)          |
| C(24) | 6531(2) | 3848(1) | 10090(1) | 23(1)          |

---

|      |         |         |         |       |
|------|---------|---------|---------|-------|
| B(1) | 4824(2) | 472(1)  | 1939(1) | 20(1) |
| F(1) | 5620(1) | 616(1)  | 1371(1) | 29(1) |
| F(2) | 3715(1) | 44(1)   | 1256(1) | 35(1) |
| F(3) | 5501(1) | 20(1)   | 2889(1) | 34(1) |
| F(4) | 4446(1) | 1224(1) | 2228(1) | 30(1) |
| B(2) | -101(2) | 4577(1) | 6925(1) | 23(1) |
| F(5) | -702(1) | 4994(1) | 5932(1) | 41(1) |
| F(6) | 190(1)  | 3783(1) | 6699(1) | 41(1) |
| F(7) | 1019(1) | 4983(1) | 7585(1) | 50(1) |
| F(8) | -940(1) | 4528(1) | 7464(1) | 37(1) |

---

Table 3. Bond lengths [Å] and angles [deg] for efcmla\_a.

---

|             |            |
|-------------|------------|
| Cl(1)-C(1)  | 1.7791(14) |
| Cl(1)-C(8)  | 1.7814(13) |
| C(1)-C(2)   | 1.3739(19) |
| C(1)-C(6)   | 1.3908(18) |
| C(2)-C(3)   | 1.387(2)   |
| C(2)-H(2)   | 0.9500     |
| C(3)-C(4)   | 1.391(2)   |
| C(3)-H(3)   | 0.9500     |
| C(4)-C(5)   | 1.385(2)   |
| C(4)-H(4)   | 0.9500     |
| C(5)-C(6)   | 1.3932(19) |
| C(5)-H(5)   | 0.9500     |
| C(6)-C(7)   | 1.4488(19) |
| C(7)-C(8)   | 1.3851(19) |
| C(7)-C(12)  | 1.3950(19) |
| C(8)-C(9)   | 1.374(2)   |
| C(9)-C(10)  | 1.391(2)   |
| C(9)-H(9)   | 0.9500     |
| C(10)-C(11) | 1.388(2)   |
| C(10)-H(10) | 0.9500     |
| C(11)-C(12) | 1.382(2)   |
| C(11)-H(11) | 0.9500     |
| C(12)-H(12) | 0.9500     |
| Cl(2)-C(13) | 1.7803(14) |
| Cl(2)-C(20) | 1.7830(14) |
| C(13)-C(14) | 1.373(2)   |
| C(13)-C(18) | 1.3889(19) |
| C(14)-C(15) | 1.393(2)   |
| C(14)-H(14) | 0.9500     |
| C(15)-C(16) | 1.392(2)   |
| C(15)-H(15) | 0.9500     |
| C(16)-C(17) | 1.384(2)   |

|             |            |
|-------------|------------|
| C(16)-H(16) | 0.9500     |
| C(17)-C(18) | 1.3936(19) |
| C(17)-H(17) | 0.9500     |
| C(18)-C(19) | 1.4495(19) |
| C(19)-C(20) | 1.3875(19) |
| C(19)-C(24) | 1.3955(19) |
| C(20)-C(21) | 1.3720(19) |
| C(21)-C(22) | 1.391(2)   |
| C(21)-H(21) | 0.9500     |
| C(22)-C(23) | 1.394(2)   |
| C(22)-H(22) | 0.9500     |
| C(23)-C(24) | 1.384(2)   |
| C(23)-H(23) | 0.9500     |
| C(24)-H(24) | 0.9500     |
| B(1)-F(3)   | 1.3857(19) |
| B(1)-F(1)   | 1.3899(18) |
| B(1)-F(2)   | 1.3913(19) |
| B(1)-F(4)   | 1.3941(17) |
| B(2)-F(7)   | 1.374(2)   |
| B(2)-F(8)   | 1.3823(19) |
| B(2)-F(5)   | 1.385(2)   |
| B(2)-F(6)   | 1.3921(18) |

|                 |            |
|-----------------|------------|
| C(1)-Cl(1)-C(8) | 92.06(7)   |
| C(2)-C(1)-C(6)  | 126.44(13) |
| C(2)-C(1)-Cl(1) | 123.20(11) |
| C(6)-C(1)-Cl(1) | 110.36(10) |
| C(1)-C(2)-C(3)  | 114.70(13) |
| C(1)-C(2)-H(2)  | 122.7      |
| C(3)-C(2)-H(2)  | 122.7      |
| C(2)-C(3)-C(4)  | 121.50(13) |
| C(2)-C(3)-H(3)  | 119.2      |
| C(4)-C(3)-H(3)  | 119.2      |
| C(5)-C(4)-C(3)  | 121.70(13) |
| C(5)-C(4)-H(4)  | 119.2      |
| C(3)-C(4)-H(4)  | 119.2      |
| C(4)-C(5)-C(6)  | 118.58(13) |
| C(4)-C(5)-H(5)  | 120.7      |
| C(6)-C(5)-H(5)  | 120.7      |
| C(1)-C(6)-C(5)  | 117.08(13) |
| C(1)-C(6)-C(7)  | 113.42(12) |
| C(5)-C(6)-C(7)  | 129.47(13) |
| C(8)-C(7)-C(12) | 116.92(13) |
| C(8)-C(7)-C(6)  | 113.88(12) |
| C(12)-C(7)-C(6) | 129.20(13) |
| C(9)-C(8)-C(7)  | 126.16(13) |
| C(9)-C(8)-Cl(1) | 123.58(11) |



|                   |            |
|-------------------|------------|
| C(7)-C(8)-Cl(1)   | 110.26(10) |
| C(8)-C(9)-C(10)   | 115.13(14) |
| C(8)-C(9)-H(9)    | 122.4      |
| C(10)-C(9)-H(9)   | 122.4      |
| C(11)-C(10)-C(9)  | 121.15(14) |
| C(11)-C(10)-H(10) | 119.4      |
| C(9)-C(10)-H(10)  | 119.4      |
| C(12)-C(11)-C(10) | 121.56(13) |
| C(12)-C(11)-H(11) | 119.2      |
| C(10)-C(11)-H(11) | 119.2      |
| C(11)-C(12)-C(7)  | 119.03(14) |
| C(11)-C(12)-H(12) | 120.5      |
| C(7)-C(12)-H(12)  | 120.5      |
| C(13)-Cl(2)-C(20) | 92.07(6)   |
| C(14)-C(13)-C(18) | 126.88(13) |
| C(14)-C(13)-Cl(2) | 122.74(11) |
| C(18)-C(13)-Cl(2) | 110.38(10) |
| C(13)-C(14)-C(15) | 114.35(13) |
| C(13)-C(14)-H(14) | 122.8      |
| C(15)-C(14)-H(14) | 122.8      |
| C(16)-C(15)-C(14) | 121.55(14) |
| C(16)-C(15)-H(15) | 119.2      |
| C(14)-C(15)-H(15) | 119.2      |
| C(17)-C(16)-C(15) | 121.55(13) |
| C(17)-C(16)-H(16) | 119.2      |
| C(15)-C(16)-H(16) | 119.2      |
| C(16)-C(17)-C(18) | 118.87(13) |
| C(16)-C(17)-H(17) | 120.6      |
| C(18)-C(17)-H(17) | 120.6      |
| C(13)-C(18)-C(17) | 116.79(13) |
| C(13)-C(18)-C(19) | 113.51(12) |
| C(17)-C(18)-C(19) | 129.67(13) |
| C(20)-C(19)-C(24) | 116.64(13) |
| C(20)-C(19)-C(18) | 113.86(12) |
| C(24)-C(19)-C(18) | 129.50(13) |
| C(21)-C(20)-C(19) | 126.69(13) |
| C(21)-C(20)-Cl(2) | 123.14(11) |
| C(19)-C(20)-Cl(2) | 110.16(10) |
| C(20)-C(21)-C(22) | 114.79(13) |
| C(20)-C(21)-H(21) | 122.6      |
| C(22)-C(21)-H(21) | 122.6      |
| C(21)-C(22)-C(23) | 121.39(14) |
| C(21)-C(22)-H(22) | 119.3      |
| C(23)-C(22)-H(22) | 119.3      |
| C(24)-C(23)-C(22) | 121.27(14) |
| C(24)-C(23)-H(23) | 119.4      |
| C(22)-C(23)-H(23) | 119.4      |

|                   |            |
|-------------------|------------|
| C(23)-C(24)-C(19) | 119.20(13) |
| C(23)-C(24)-H(24) | 120.4      |
| C(19)-C(24)-H(24) | 120.4      |
| F(3)-B(1)-F(1)    | 109.78(13) |
| F(3)-B(1)-F(2)    | 109.97(12) |
| F(1)-B(1)-F(2)    | 109.35(13) |
| F(3)-B(1)-F(4)    | 109.62(13) |
| F(1)-B(1)-F(4)    | 108.99(12) |
| F(2)-B(1)-F(4)    | 109.12(13) |
| F(7)-B(2)-F(8)    | 109.53(14) |
| F(7)-B(2)-F(5)    | 109.69(13) |
| F(8)-B(2)-F(5)    | 109.81(14) |
| F(7)-B(2)-F(6)    | 110.53(14) |
| F(8)-B(2)-F(6)    | 108.60(12) |
| F(5)-B(2)-F(6)    | 108.66(13) |

---

Symmetry transformations used to generate equivalent atoms:

Table 4. Anisotropic displacement parameters ( $\text{\AA}^2 \times 10^3$ ) for efcmla\_a.

The anisotropic displacement factor exponent takes the form:

$$-2 \pi^2 [ h^2 a^{*2} U_{11} + \dots + 2 h k a^* b^* U_{12} ]$$

---

|       | U11   | U22   | U33   | U23   | U13   | U12   |
|-------|-------|-------|-------|-------|-------|-------|
| Cl(1) | 22(1) | 14(1) | 24(1) | -2(1) | 12(1) | 0(1)  |
| C(1)  | 18(1) | 18(1) | 19(1) | -2(1) | 9(1)  | 1(1)  |
| C(2)  | 23(1) | 16(1) | 24(1) | -1(1) | 9(1)  | -1(1) |
| C(3)  | 23(1) | 21(1) | 24(1) | 1(1)  | 10(1) | -2(1) |
| C(4)  | 22(1) | 22(1) | 21(1) | -1(1) | 11(1) | 2(1)  |
| C(5)  | 21(1) | 17(1) | 21(1) | -1(1) | 7(1)  | 2(1)  |
| C(6)  | 17(1) | 16(1) | 18(1) | 0(1)  | 4(1)  | 1(1)  |
| C(7)  | 18(1) | 16(1) | 19(1) | 1(1)  | 6(1)  | 0(1)  |
| C(8)  | 19(1) | 13(1) | 21(1) | 1(1)  | 6(1)  | -1(1) |
| C(9)  | 21(1) | 20(1) | 22(1) | 0(1)  | 9(1)  | 0(1)  |
| C(10) | 25(1) | 22(1) | 25(1) | 4(1)  | 10(1) | -2(1) |
| C(11) | 28(1) | 16(1) | 30(1) | 3(1)  | 11(1) | -1(1) |
| C(12) | 25(1) | 15(1) | 28(1) | -1(1) | 10(1) | 1(1)  |
| Cl(2) | 23(1) | 14(1) | 24(1) | 2(1)  | 13(1) | 0(1)  |
| C(13) | 19(1) | 18(1) | 20(1) | 2(1)  | 9(1)  | -2(1) |
| C(14) | 20(1) | 19(1) | 24(1) | 0(1)  | 9(1)  | 0(1)  |
| C(15) | 20(1) | 24(1) | 22(1) | 0(1)  | 10(1) | 0(1)  |
| C(16) | 22(1) | 24(1) | 20(1) | 2(1)  | 10(1) | -4(1) |

|       |       |       |       |        |       |        |
|-------|-------|-------|-------|--------|-------|--------|
| C(17) | 23(1) | 17(1) | 20(1) | 2(1)   | 8(1)  | -3(1)  |
| C(18) | 18(1) | 17(1) | 18(1) | 0(1)   | 6(1)  | -2(1)  |
| C(19) | 19(1) | 16(1) | 17(1) | 1(1)   | 6(1)  | -1(1)  |
| C(20) | 20(1) | 13(1) | 19(1) | -1(1)  | 6(1)  | 0(1)   |
| C(21) | 20(1) | 20(1) | 20(1) | 1(1)   | 9(1)  | -1(1)  |
| C(22) | 25(1) | 22(1) | 21(1) | -1(1)  | 10(1) | 1(1)   |
| C(23) | 30(1) | 17(1) | 25(1) | -2(1)  | 12(1) | 1(1)   |
| C(24) | 28(1) | 17(1) | 23(1) | 1(1)   | 10(1) | -2(1)  |
| B(1)  | 27(1) | 14(1) | 25(1) | 0(1)   | 16(1) | -1(1)  |
| F(1)  | 36(1) | 25(1) | 38(1) | 3(1)   | 26(1) | 1(1)   |
| F(2)  | 38(1) | 30(1) | 39(1) | -10(1) | 17(1) | -14(1) |
| F(3)  | 52(1) | 26(1) | 27(1) | 6(1)   | 19(1) | 9(1)   |
| F(4)  | 38(1) | 18(1) | 40(1) | -4(1)  | 23(1) | 2(1)   |
| B(2)  | 30(1) | 16(1) | 27(1) | 1(1)   | 17(1) | 1(1)   |
| F(5)  | 51(1) | 38(1) | 37(1) | 15(1)  | 22(1) | 14(1)  |
| F(6)  | 63(1) | 19(1) | 62(1) | 2(1)   | 47(1) | 8(1)   |
| F(7)  | 47(1) | 49(1) | 47(1) | 2(1)   | 12(1) | -24(1) |
| F(8)  | 54(1) | 26(1) | 49(1) | -2(1)  | 40(1) | -1(1)  |

---

**2w**

Table 1. Crystal data and structure refinement for jwdml220325.

|                                 |                                                                                                                                           |
|---------------------------------|-------------------------------------------------------------------------------------------------------------------------------------------|
| Identification code             | jwdml220325                                                                                                                               |
| Empirical formula               | C <sub>15</sub> H <sub>12</sub> Cl F <sub>3</sub> O <sub>3</sub> S                                                                        |
| Formula weight                  | 364.76                                                                                                                                    |
| Temperature                     | 120(2) K                                                                                                                                  |
| Wavelength                      | 0.71073 Å                                                                                                                                 |
| Crystal system, space group     | Triclinic, P -1                                                                                                                           |
| Unit cell dimensions            | a = 6.8197(2) Å    alpha = 65.2470(10) deg.<br>b = 9.9960(3) Å    beta = 87.4440(10) deg.<br>c = 11.8872(3) Å    gamma = 79.7850(10) deg. |
| Volume                          | 723.83(4) Å <sup>3</sup>                                                                                                                  |
| Z, Calculated density           | 2, 1.674 Mg/m <sup>3</sup>                                                                                                                |
| Absorption coefficient          | 0.454 mm <sup>-1</sup>                                                                                                                    |
| F(000)                          | 372                                                                                                                                       |
| Crystal size                    | 0.140 x 0.100 x 0.060 mm                                                                                                                  |
| Theta range for data collection | 2.272 to 29.075 deg.                                                                                                                      |
| Limiting indices                | -9 ≤ h ≤ 9, -13 ≤ k ≤ 13, -16 ≤ l ≤ 16                                                                                                    |
| Reflections collected / unique  | 48653 / 3870 [R(int) = 0.0366]                                                                                                            |
| Completeness to theta = 25.242  | 100.0 %                                                                                                                                   |
| Absorption correction           | Semi-empirical from equivalents                                                                                                           |
| Max. and min. transmission      | 0.7458 and 0.7209                                                                                                                         |
| Refinement method               | Full-matrix least-squares on F <sup>2</sup>                                                                                               |
| Data / restraints / parameters  | 3870 / 0 / 210                                                                                                                            |

Goodness-of-fit on  $F^2$       1.052

Final R indices [ $I > 2\sigma(I)$ ]     $R1 = 0.0344$ ,  $wR2 = 0.0913$

R indices (all data)             $R1 = 0.0393$ ,  $wR2 = 0.0960$

Extinction coefficient          n/a

Largest diff. peak and hole    0.605 and -0.419 e. $\text{\AA}^{-3}$

Table 2. Atomic coordinates ( $\times 10^4$ ) and equivalent isotropic displacement parameters ( $\text{\AA}^2 \times 10^3$ ) for jwdml220325.

U(eq) is defined as one third of the trace of the orthogonalized  $U_{ij}$  tensor.

|       | x       | y        | z        | U(eq) |
|-------|---------|----------|----------|-------|
| C(1)  | 2581(2) | 4315(2)  | 9424(1)  | 15(1) |
| C(2)  | 2465(2) | 2831(2)  | 10160(1) | 16(1) |
| C(3)  | 2333(2) | 2515(2)  | 11425(1) | 17(1) |
| C(4)  | 2313(2) | 3612(2)  | 11859(1) | 18(1) |
| C(5)  | 2390(2) | 5095(2)  | 11062(1) | 16(1) |
| C(6)  | 2528(2) | 5473(2)  | 9792(1)  | 14(1) |
| C(7)  | 2583(2) | 6921(2)  | 8767(1)  | 14(1) |
| C(8)  | 2502(2) | 8327(2)  | 8771(1)  | 16(1) |
| C(9)  | 2499(2) | 9569(2)  | 7649(1)  | 17(1) |
| C(10) | 2585(2) | 9465(2)  | 6506(1)  | 17(1) |
| C(11) | 2696(2) | 8070(2)  | 6476(1)  | 16(1) |
| C(12) | 2684(2) | 6877(2)  | 7613(1)  | 15(1) |
| C(13) | 2437(2) | 1695(2)  | 9648(2)  | 22(1) |
| C(14) | 2498(3) | 10853(2) | 5313(1)  | 22(1) |
| C(15) | 2084(3) | 6175(2)  | 3939(1)  | 22(1) |
| O(1)  | 5348(2) | 7227(2)  | 3268(1)  | 32(1) |
| O(2)  | 2365(2) | 8914(1)  | 3354(1)  | 25(1) |
| O(3)  | 2679(2) | 8006(1)  | 1730(1)  | 33(1) |
| F(1)  | 2921(2) | 4927(1)  | 3826(1)  | 34(1) |
| F(2)  | 2253(2) | 5901(1)  | 5134(1)  | 38(1) |
| F(3)  | 158(2)  | 6427(2)  | 3647(1)  | 45(1) |
| S(1)  | 3258(1) | 7766(1)  | 2964(1)  | 17(1) |
| Cl(1) | 2774(1) | 5002(1)  | 7779(1)  | 16(1) |

Table 3. Bond lengths [ $\text{\AA}$ ] and angles [ $^\circ$ ] for jwdml220325.

---

|                 |            |
|-----------------|------------|
| C(1)-C(2)       | 1.3854(19) |
| C(1)-C(6)       | 1.3935(19) |
| C(1)-Cl(1)      | 1.7882(14) |
| C(2)-C(3)       | 1.404(2)   |
| C(2)-C(13)      | 1.500(2)   |
| C(3)-C(4)       | 1.392(2)   |
| C(3)-H(3)       | 0.9500     |
| C(4)-C(5)       | 1.394(2)   |
| C(4)-H(4)       | 0.9500     |
| C(5)-C(6)       | 1.3973(19) |
| C(5)-H(5)       | 0.9500     |
| C(6)-C(7)       | 1.4559(19) |
| C(7)-C(12)      | 1.3894(19) |
| C(7)-C(8)       | 1.3989(19) |
| C(8)-C(9)       | 1.390(2)   |
| C(8)-H(8)       | 0.9500     |
| C(9)-C(10)      | 1.403(2)   |
| C(9)-H(9)       | 0.9500     |
| C(10)-C(11)     | 1.398(2)   |
| C(10)-C(14)     | 1.507(2)   |
| C(11)-C(12)     | 1.3783(19) |
| C(11)-H(11)     | 0.9500     |
| C(12)-Cl(1)     | 1.7906(14) |
| C(13)-H(13A)    | 0.9800     |
| C(13)-H(13B)    | 0.9800     |
| C(13)-H(13C)    | 0.9800     |
| C(14)-H(14A)    | 0.9800     |
| C(14)-H(14B)    | 0.9800     |
| C(14)-H(14C)    | 0.9800     |
| C(15)-F(3)      | 1.326(2)   |
| C(15)-F(1)      | 1.3343(19) |
| C(15)-F(2)      | 1.3356(17) |
| C(15)-S(1)      | 1.8274(16) |
| O(1)-S(1)       | 1.4366(13) |
| O(2)-S(1)       | 1.4412(11) |
| O(3)-S(1)       | 1.4445(12) |
|                 |            |
| C(2)-C(1)-C(6)  | 128.04(13) |
| C(2)-C(1)-Cl(1) | 121.79(11) |
| C(6)-C(1)-Cl(1) | 110.17(10) |
| C(1)-C(2)-C(3)  | 113.02(13) |
| C(1)-C(2)-C(13) | 123.24(13) |
| C(3)-C(2)-C(13) | 123.73(13) |
| C(4)-C(3)-C(2)  | 121.93(13) |
| C(4)-C(3)-H(3)  | 119.0      |

|                     |            |
|---------------------|------------|
| C(2)-C(3)-H(3)      | 119.0      |
| C(3)-C(4)-C(5)      | 122.03(13) |
| C(3)-C(4)-H(4)      | 119.0      |
| C(5)-C(4)-H(4)      | 119.0      |
| C(4)-C(5)-C(6)      | 118.49(13) |
| C(4)-C(5)-H(5)      | 120.8      |
| C(6)-C(5)-H(5)      | 120.8      |
| C(1)-C(6)-C(5)      | 116.47(12) |
| C(1)-C(6)-C(7)      | 113.73(12) |
| C(5)-C(6)-C(7)      | 129.78(13) |
| C(12)-C(7)-C(8)     | 116.20(13) |
| C(12)-C(7)-C(6)     | 113.73(12) |
| C(8)-C(7)-C(6)      | 130.06(13) |
| C(9)-C(8)-C(7)      | 119.16(13) |
| C(9)-C(8)-H(8)      | 120.4      |
| C(7)-C(8)-H(8)      | 120.4      |
| C(8)-C(9)-C(10)     | 122.33(13) |
| C(8)-C(9)-H(9)      | 118.8      |
| C(10)-C(9)-H(9)     | 118.8      |
| C(11)-C(10)-C(9)    | 119.71(13) |
| C(11)-C(10)-C(14)   | 119.97(13) |
| C(9)-C(10)-C(14)    | 120.29(13) |
| C(12)-C(11)-C(10)   | 115.63(13) |
| C(12)-C(11)-H(11)   | 122.2      |
| C(10)-C(11)-H(11)   | 122.2      |
| C(11)-C(12)-C(7)    | 126.97(13) |
| C(11)-C(12)-Cl(1)   | 122.77(11) |
| C(7)-C(12)-Cl(1)    | 110.26(10) |
| C(2)-C(13)-H(13A)   | 109.5      |
| C(2)-C(13)-H(13B)   | 109.5      |
| H(13A)-C(13)-H(13B) | 109.5      |
| C(2)-C(13)-H(13C)   | 109.5      |
| H(13A)-C(13)-H(13C) | 109.5      |
| H(13B)-C(13)-H(13C) | 109.5      |
| C(10)-C(14)-H(14A)  | 109.5      |
| C(10)-C(14)-H(14B)  | 109.5      |
| H(14A)-C(14)-H(14B) | 109.5      |
| C(10)-C(14)-H(14C)  | 109.5      |
| H(14A)-C(14)-H(14C) | 109.5      |
| H(14B)-C(14)-H(14C) | 109.5      |
| F(3)-C(15)-F(1)     | 107.60(13) |
| F(3)-C(15)-F(2)     | 107.78(14) |
| F(1)-C(15)-F(2)     | 107.24(13) |
| F(3)-C(15)-S(1)     | 111.30(11) |
| F(1)-C(15)-S(1)     | 111.75(11) |
| F(2)-C(15)-S(1)     | 110.96(11) |
| O(1)-S(1)-O(2)      | 115.15(8)  |

|                  |           |
|------------------|-----------|
| O(1)-S(1)-O(3)   | 114.41(9) |
| O(2)-S(1)-O(3)   | 115.53(8) |
| O(1)-S(1)-C(15)  | 103.95(8) |
| O(2)-S(1)-C(15)  | 102.94(7) |
| O(3)-S(1)-C(15)  | 102.37(7) |
| C(1)-Cl(1)-C(12) | 92.06(7)  |

Symmetry transformations used to generate equivalent atoms:

Table 4. Anisotropic displacement parameters ( $\text{\AA}^2 \times 10^3$ ) for jwdml220325. The anisotropic displacement factor exponent takes the form:  $-2 \pi^2 [ h^2 a^{*2} U_{11} + \dots + 2 h k a^* b^* U_{12} ]$

|       | U11   | U22   | U33   | U23    | U13  | U12    |
|-------|-------|-------|-------|--------|------|--------|
| C(1)  | 16(1) | 16(1) | 11(1) | -5(1)  | 0(1) | -3(1)  |
| C(2)  | 17(1) | 14(1) | 16(1) | -5(1)  | 0(1) | -3(1)  |
| C(3)  | 18(1) | 14(1) | 16(1) | -3(1)  | 0(1) | -3(1)  |
| C(4)  | 19(1) | 18(1) | 13(1) | -4(1)  | 0(1) | -3(1)  |
| C(5)  | 17(1) | 16(1) | 14(1) | -7(1)  | 0(1) | -3(1)  |
| C(6)  | 14(1) | 13(1) | 14(1) | -5(1)  | 0(1) | -3(1)  |
| C(7)  | 15(1) | 14(1) | 13(1) | -6(1)  | 0(1) | -3(1)  |
| C(8)  | 20(1) | 15(1) | 15(1) | -8(1)  | 0(1) | -4(1)  |
| C(9)  | 22(1) | 14(1) | 18(1) | -7(1)  | 0(1) | -4(1)  |
| C(10) | 19(1) | 15(1) | 15(1) | -5(1)  | 0(1) | -4(1)  |
| C(11) | 21(1) | 16(1) | 13(1) | -6(1)  | 1(1) | -3(1)  |
| C(12) | 19(1) | 11(1) | 15(1) | -7(1)  | 1(1) | -3(1)  |
| C(13) | 31(1) | 15(1) | 21(1) | -8(1)  | 3(1) | -6(1)  |
| C(14) | 32(1) | 15(1) | 15(1) | -4(1)  | 0(1) | -4(1)  |
| C(15) | 38(1) | 17(1) | 14(1) | -6(1)  | 2(1) | -10(1) |
| O(1)  | 26(1) | 28(1) | 44(1) | -18(1) | 3(1) | -5(1)  |
| O(2)  | 37(1) | 14(1) | 23(1) | -9(1)  | 5(1) | -3(1)  |
| O(3)  | 62(1) | 25(1) | 12(1) | -5(1)  | 0(1) | -16(1) |
| F(1)  | 67(1) | 15(1) | 23(1) | -10(1) | 4(1) | -12(1) |
| F(2)  | 81(1) | 24(1) | 12(1) | -7(1)  | 9(1) | -22(1) |
| F(3)  | 36(1) | 44(1) | 53(1) | -12(1) | 3(1) | -22(1) |
| S(1)  | 27(1) | 12(1) | 13(1) | -5(1)  | 2(1) | -5(1)  |
| Cl(1) | 24(1) | 13(1) | 12(1) | -6(1)  | 2(1) | -4(1)  |

Table 5. Hydrogen coordinates ( $\times 10^4$ ) and isotropic displacement parameters ( $\text{\AA}^2 \times 10^3$ ) for jwdml220325.



|        | x    | y     | z     | U(eq) |
|--------|------|-------|-------|-------|
| H(3)   | 2254 | 1523  | 12002 | 21    |
| H(4)   | 2245 | 3343  | 12725 | 21    |
| H(5)   | 2350 | 5831  | 11375 | 19    |
| H(8)   | 2450 | 8432  | 9530  | 19    |
| H(9)   | 2437 | 10523 | 7656  | 21    |
| H(11)  | 2776 | 7952  | 5722  | 20    |
| H(13A) | 1253 | 1991  | 9103  | 32    |
| H(13B) | 2402 | 715   | 10331 | 32    |
| H(13C) | 3638 | 1636  | 9174  | 32    |
| H(14A) | 1133 | 11415 | 5146  | 33    |
| H(14B) | 2907 | 10567 | 4631  | 33    |
| H(14C) | 3399 | 11477 | 5385  | 33    |

Table 6. Torsion angles [deg] for jwdml220325.

|                        |             |
|------------------------|-------------|
| C(6)-C(1)-C(2)-C(3)    | -1.7(2)     |
| Cl(1)-C(1)-C(2)-C(3)   | 179.67(10)  |
| C(6)-C(1)-C(2)-C(13)   | 176.90(14)  |
| Cl(1)-C(1)-C(2)-C(13)  | -1.7(2)     |
| C(1)-C(2)-C(3)-C(4)    | 0.3(2)      |
| C(13)-C(2)-C(3)-C(4)   | -178.33(14) |
| C(2)-C(3)-C(4)-C(5)    | 1.1(2)      |
| C(3)-C(4)-C(5)-C(6)    | -1.2(2)     |
| C(2)-C(1)-C(6)-C(5)    | 1.7(2)      |
| Cl(1)-C(1)-C(6)-C(5)   | -179.63(10) |
| C(2)-C(1)-C(6)-C(7)    | -177.01(14) |
| Cl(1)-C(1)-C(6)-C(7)   | 1.71(15)    |
| C(4)-C(5)-C(6)-C(1)    | -0.1(2)     |
| C(4)-C(5)-C(6)-C(7)    | 178.34(14)  |
| C(1)-C(6)-C(7)-C(12)   | -0.22(18)   |
| C(5)-C(6)-C(7)-C(12)   | -178.66(14) |
| C(1)-C(6)-C(7)-C(8)    | 178.10(14)  |
| C(5)-C(6)-C(7)-C(8)    | -0.3(3)     |
| C(12)-C(7)-C(8)-C(9)   | 0.9(2)      |
| C(6)-C(7)-C(8)-C(9)    | -177.42(14) |
| C(7)-C(8)-C(9)-C(10)   | -0.3(2)     |
| C(8)-C(9)-C(10)-C(11)  | -0.6(2)     |
| C(8)-C(9)-C(10)-C(14)  | 177.63(14)  |
| C(9)-C(10)-C(11)-C(12) | 0.9(2)      |

|                         |             |
|-------------------------|-------------|
| C(14)-C(10)-C(11)-C(12) | -177.34(13) |
| C(10)-C(11)-C(12)-C(7)  | -0.3(2)     |
| C(10)-C(11)-C(12)-Cl(1) | 178.97(11)  |
| C(8)-C(7)-C(12)-C(11)   | -0.6(2)     |
| C(6)-C(7)-C(12)-C(11)   | 178.01(14)  |
| C(8)-C(7)-C(12)-Cl(1)   | -179.94(10) |
| C(6)-C(7)-C(12)-Cl(1)   | -1.37(15)   |
| F(3)-C(15)-S(1)-O(1)    | -171.66(12) |
| F(1)-C(15)-S(1)-O(1)    | -51.33(13)  |
| F(2)-C(15)-S(1)-O(1)    | 68.31(14)   |
| F(3)-C(15)-S(1)-O(2)    | 67.91(13)   |
| F(1)-C(15)-S(1)-O(2)    | -171.76(11) |
| F(2)-C(15)-S(1)-O(2)    | -52.11(14)  |
| F(3)-C(15)-S(1)-O(3)    | -52.30(14)  |
| F(1)-C(15)-S(1)-O(3)    | 68.04(13)   |
| F(2)-C(15)-S(1)-O(3)    | -172.32(13) |
| C(2)-C(1)-Cl(1)-C(12)   | 176.72(12)  |
| C(6)-C(1)-Cl(1)-C(12)   | -2.09(11)   |
| C(11)-C(12)-Cl(1)-C(1)  | -177.44(13) |
| C(7)-C(12)-Cl(1)-C(1)   | 1.97(11)    |

---

Symmetry transformations used to generate equivalent atoms:

Table 1. Crystal data and structure refinement for **19**.

|                                 |                                                                                                                  |
|---------------------------------|------------------------------------------------------------------------------------------------------------------|
| Identification code             | jwdml220324                                                                                                      |
| Empirical formula               | C <sub>18</sub> H <sub>11</sub> Cl O                                                                             |
| Formula weight                  | 278.72                                                                                                           |
| Temperature                     | 120(2) K                                                                                                         |
| Wavelength                      | 1.54178 Å                                                                                                        |
| Crystal system, space group     | Orthorhombic, P 21 21 21                                                                                         |
| Unit cell dimensions            | a = 3.8406(2) Å    alpha = 90 deg.<br>b = 13.4224(8) Å    beta = 90 deg.<br>c = 24.5771(15) Å    gamma = 90 deg. |
| Volume                          | 1266.95(13) Å <sup>3</sup>                                                                                       |
| Z, Calculated density           | 4, 1.461 Mg/m <sup>3</sup>                                                                                       |
| Absorption coefficient          | 2.579 mm <sup>-1</sup>                                                                                           |
| F(000)                          | 576                                                                                                              |
| Crystal size                    | 0.250 x 0.120 x 0.100 mm                                                                                         |
| Theta range for data collection | 3.597 to 66.664 deg.                                                                                             |
| Limiting indices                | -4 ≤ h ≤ 4, -15 ≤ k ≤ 15, -29 ≤ l ≤ 29                                                                           |
| Reflections collected / unique  | 25318 / 2259 [R(int) = 0.0620]                                                                                   |
| Completeness to theta = 66.664  | 100.1 %                                                                                                          |
| Absorption correction           | Semi-empirical from equivalents                                                                                  |
| Max. and min. transmission      | 0.7528 and 0.5309                                                                                                |
| Refinement method               | Full-matrix least-squares on F <sup>2</sup>                                                                      |
| Data / restraints / parameters  | 2259 / 0 / 182                                                                                                   |

Goodness-of-fit on  $F^2$  1.100

Final R indices [ $I > 2\sigma(I)$ ]  $R1 = 0.0277$ ,  $wR2 = 0.0731$

R indices (all data)  $R1 = 0.0279$ ,  $wR2 = 0.0733$

Absolute structure parameter 0.466(18)

Extinction coefficient n/a

Largest diff. peak and hole 0.454 and -0.244 e. $\text{\AA}^{-3}$

Table 2. Atomic coordinates ( $\times 10^4$ ) and equivalent isotropic displacement parameters ( $\text{\AA}^2 \times 10^3$ ) for jwdml220324.  $U(\text{eq})$  is defined as one third of the trace of the orthogonalized  $U_{ij}$  tensor.

|       | x       | y       | z       | $U(\text{eq})$ |
|-------|---------|---------|---------|----------------|
| C(1)  | 6814(6) | 1663(2) | 7392(1) | 20(1)          |
| C(2)  | 6303(7) | 1347(2) | 7924(1) | 25(1)          |
| C(3)  | 4892(7) | 1998(2) | 8304(1) | 26(1)          |
| C(4)  | 4069(7) | 2966(2) | 8149(1) | 24(1)          |
| C(5)  | 4631(7) | 3271(2) | 7620(1) | 23(1)          |
| C(6)  | 6002(6) | 2630(2) | 7223(1) | 20(1)          |
| C(7)  | 6466(7) | 3020(2) | 6659(1) | 18(1)          |
| C(8)  | 7912(6) | 3969(2) | 6595(1) | 19(1)          |
| C(9)  | 8043(6) | 4358(2) | 6078(1) | 18(1)          |
| C(10) | 8895(7) | 5395(2) | 5397(1) | 19(1)          |
| C(11) | 9798(7) | 6230(2) | 5106(1) | 23(1)          |
| C(12) | 9093(7) | 6206(2) | 4550(1) | 24(1)          |
| C(13) | 7517(7) | 5387(2) | 4309(1) | 23(1)          |
| C(14) | 6586(7) | 4555(2) | 4609(1) | 21(1)          |
| C(15) | 7304(6) | 4556(2) | 5168(1) | 19(1)          |
| C(16) | 6774(6) | 3870(2) | 5618(1) | 18(1)          |
| C(17) | 5351(6) | 2918(2) | 5683(1) | 18(1)          |
| C(18) | 5226(6) | 2504(2) | 6199(1) | 20(1)          |
| O(1)  | 9391(5) | 5286(1) | 5953(1) | 20(1)          |
| Cl(1) | 8673(2) | 800(1)  | 6945(1) | 25(1)          |

Table 3. Bond lengths [ $\text{\AA}$ ] and angles [ $\text{deg}$ ] for jwdml220324.

|                 |            |
|-----------------|------------|
| C(1)-C(2)       | 1.389(3)   |
| C(1)-C(6)       | 1.398(3)   |
| C(1)-Cl(1)      | 1.749(2)   |
| C(2)-C(3)       | 1.388(4)   |
| C(2)-H(2)       | 0.9500     |
| C(3)-C(4)       | 1.390(4)   |
| C(3)-H(3)       | 0.9500     |
| C(4)-C(5)       | 1.381(3)   |
| C(4)-H(4)       | 0.9500     |
| C(5)-C(6)       | 1.403(3)   |
| C(5)-H(5)       | 0.9500     |
| C(6)-C(7)       | 1.493(3)   |
| C(7)-C(8)       | 1.397(3)   |
| C(7)-C(18)      | 1.407(3)   |
| C(8)-C(9)       | 1.376(3)   |
| C(8)-H(8)       | 0.9500     |
| C(9)-O(1)       | 1.384(3)   |
| C(9)-C(16)      | 1.395(3)   |
| C(10)-C(11)     | 1.373(3)   |
| C(10)-O(1)      | 1.386(3)   |
| C(10)-C(15)     | 1.400(3)   |
| C(11)-C(12)     | 1.394(3)   |
| C(11)-H(11)     | 0.9500     |
| C(12)-C(13)     | 1.388(4)   |
| C(12)-H(12)     | 0.9500     |
| C(13)-C(14)     | 1.385(3)   |
| C(13)-H(13)     | 0.9500     |
| C(14)-C(15)     | 1.402(3)   |
| C(14)-H(14)     | 0.9500     |
| C(15)-C(16)     | 1.453(3)   |
| C(16)-C(17)     | 1.399(3)   |
| C(17)-C(18)     | 1.387(3)   |
| C(17)-H(17)     | 0.9500     |
| C(18)-H(18)     | 0.9500     |
|                 |            |
| C(2)-C(1)-C(6)  | 122.2(2)   |
| C(2)-C(1)-Cl(1) | 116.51(19) |
| C(6)-C(1)-Cl(1) | 121.30(18) |
| C(3)-C(2)-C(1)  | 119.7(2)   |
| C(3)-C(2)-H(2)  | 120.1      |
| C(1)-C(2)-H(2)  | 120.1      |
| C(2)-C(3)-C(4)  | 119.5(2)   |
| C(2)-C(3)-H(3)  | 120.2      |
| C(4)-C(3)-H(3)  | 120.2      |
| C(5)-C(4)-C(3)  | 119.9(2)   |
| C(5)-C(4)-H(4)  | 120.0      |

|                   |            |
|-------------------|------------|
| C(3)-C(4)-H(4)    | 120.0      |
| C(4)-C(5)-C(6)    | 122.2(2)   |
| C(4)-C(5)-H(5)    | 118.9      |
| C(6)-C(5)-H(5)    | 118.9      |
| C(1)-C(6)-C(5)    | 116.5(2)   |
| C(1)-C(6)-C(7)    | 125.1(2)   |
| C(5)-C(6)-C(7)    | 118.4(2)   |
| C(8)-C(7)-C(18)   | 119.6(2)   |
| C(8)-C(7)-C(6)    | 118.1(2)   |
| C(18)-C(7)-C(6)   | 122.1(2)   |
| C(9)-C(8)-C(7)    | 117.6(2)   |
| C(9)-C(8)-H(8)    | 121.2      |
| C(7)-C(8)-H(8)    | 121.2      |
| C(8)-C(9)-O(1)    | 124.2(2)   |
| C(8)-C(9)-C(16)   | 123.9(2)   |
| O(1)-C(9)-C(16)   | 111.94(19) |
| C(11)-C(10)-O(1)  | 124.3(2)   |
| C(11)-C(10)-C(15) | 123.9(2)   |
| O(1)-C(10)-C(15)  | 111.8(2)   |
| C(10)-C(11)-C(12) | 116.3(2)   |
| C(10)-C(11)-H(11) | 121.9      |
| C(12)-C(11)-H(11) | 121.9      |
| C(13)-C(12)-C(11) | 121.4(2)   |
| C(13)-C(12)-H(12) | 119.3      |
| C(11)-C(12)-H(12) | 119.3      |
| C(14)-C(13)-C(12) | 121.6(2)   |
| C(14)-C(13)-H(13) | 119.2      |
| C(12)-C(13)-H(13) | 119.2      |
| C(13)-C(14)-C(15) | 118.0(2)   |
| C(13)-C(14)-H(14) | 121.0      |
| C(15)-C(14)-H(14) | 121.0      |
| C(10)-C(15)-C(14) | 118.7(2)   |
| C(10)-C(15)-C(16) | 105.40(19) |
| C(14)-C(15)-C(16) | 135.9(2)   |
| C(9)-C(16)-C(17)  | 118.3(2)   |
| C(9)-C(16)-C(15)  | 105.6(2)   |
| C(17)-C(16)-C(15) | 136.0(2)   |
| C(18)-C(17)-C(16) | 118.9(2)   |
| C(18)-C(17)-H(17) | 120.6      |
| C(16)-C(17)-H(17) | 120.6      |
| C(17)-C(18)-C(7)  | 121.7(2)   |
| C(17)-C(18)-H(18) | 119.1      |
| C(7)-C(18)-H(18)  | 119.1      |
| C(9)-O(1)-C(10)   | 105.24(18) |

---

Symmetry transformations used to generate equivalent atoms:

Table 4. Anisotropic displacement parameters ( $\text{Å}^2 \times 10^3$ ) for jwdml220324.  
 The anisotropic displacement factor exponent takes the form:  
 $-2 \pi^2 [ h^2 a^{*2} U_{11} + \dots + 2 h k a^* b^* U_{12} ]$

|       | U11   | U22   | U33   | U23   | U13   | U12   |
|-------|-------|-------|-------|-------|-------|-------|
| C(1)  | 16(1) | 19(1) | 25(1) | -1(1) | 1(1)  | -3(1) |
| C(2)  | 24(1) | 23(1) | 27(1) | 5(1)  | -4(1) | -5(1) |
| C(3)  | 29(1) | 27(1) | 21(1) | 2(1)  | -2(1) | -5(1) |
| C(4)  | 24(1) | 27(1) | 21(1) | -3(1) | 0(1)  | -1(1) |
| C(5)  | 20(1) | 27(1) | 21(1) | 3(1)  | -4(1) | -2(1) |
| C(6)  | 14(1) | 22(1) | 23(1) | 1(1)  | -3(1) | -3(1) |
| C(7)  | 15(1) | 17(1) | 22(1) | 0(1)  | 0(1)  | 2(1)  |
| C(8)  | 19(1) | 18(1) | 20(1) | -2(1) | -1(1) | 1(1)  |
| C(9)  | 17(1) | 13(1) | 24(1) | -1(1) | 2(1)  | 0(1)  |
| C(10) | 19(1) | 19(1) | 19(1) | -1(1) | 1(1)  | 3(1)  |
| C(11) | 24(1) | 18(1) | 25(1) | -1(1) | 4(1)  | 0(1)  |
| C(12) | 28(1) | 20(1) | 24(1) | 4(1)  | 5(1)  | 4(1)  |
| C(13) | 25(1) | 25(1) | 19(1) | 1(1)  | 2(1)  | 5(1)  |
| C(14) | 18(1) | 22(1) | 22(1) | -3(1) | 1(1)  | 2(1)  |
| C(15) | 16(1) | 19(1) | 21(1) | -1(1) | 3(1)  | 4(1)  |
| C(16) | 16(1) | 18(1) | 19(1) | -2(1) | 1(1)  | 3(1)  |
| C(17) | 16(1) | 18(1) | 21(1) | -4(1) | 1(1)  | 0(1)  |
| C(18) | 18(1) | 17(1) | 24(1) | -1(1) | 1(1)  | -1(1) |
| O(1)  | 25(1) | 15(1) | 20(1) | -1(1) | 0(1)  | -3(1) |
| Cl(1) | 26(1) | 19(1) | 30(1) | -2(1) | 4(1)  | 2(1)  |

Table 5. Hydrogen coordinates ( $\times 10^4$ ) and isotropic displacement parameters ( $\text{Å}^2 \times 10^3$ ) for jwdml220324.

|       | x     | y    | z    | U(eq) |
|-------|-------|------|------|-------|
| H(2)  | 6916  | 688  | 8028 | 30    |
| H(3)  | 4491  | 1783 | 8667 | 31    |
| H(4)  | 3121  | 3417 | 8407 | 29    |
| H(5)  | 4071  | 3936 | 7521 | 27    |
| H(8)  | 8773  | 4331 | 6899 | 23    |
| H(11) | 10844 | 6792 | 5275 | 27    |

|       |      |      |      |    |
|-------|------|------|------|----|
| H(12) | 9704 | 6763 | 4332 | 29 |
| H(13) | 7068 | 5397 | 3929 | 28 |
| H(14) | 5492 | 4000 | 4441 | 25 |
| H(17) | 4484 | 2561 | 5378 | 22 |
| H(18) | 4279 | 1856 | 6245 | 24 |

Table 6. Torsion angles [deg] for jwdml220324.

|                         |             |
|-------------------------|-------------|
| C(6)-C(1)-C(2)-C(3)     | 1.0(4)      |
| Cl(1)-C(1)-C(2)-C(3)    | 179.0(2)    |
| C(1)-C(2)-C(3)-C(4)     | -1.3(4)     |
| C(2)-C(3)-C(4)-C(5)     | 0.5(4)      |
| C(3)-C(4)-C(5)-C(6)     | 0.5(4)      |
| C(2)-C(1)-C(6)-C(5)     | 0.0(4)      |
| Cl(1)-C(1)-C(6)-C(5)    | -177.89(19) |
| C(2)-C(1)-C(6)-C(7)     | -179.7(2)   |
| Cl(1)-C(1)-C(6)-C(7)    | 2.4(3)      |
| C(4)-C(5)-C(6)-C(1)     | -0.7(4)     |
| C(4)-C(5)-C(6)-C(7)     | 179.0(2)    |
| C(1)-C(6)-C(7)-C(8)     | -136.0(3)   |
| C(5)-C(6)-C(7)-C(8)     | 44.3(3)     |
| C(1)-C(6)-C(7)-C(18)    | 49.6(4)     |
| C(5)-C(6)-C(7)-C(18)    | -130.1(3)   |
| C(18)-C(7)-C(8)-C(9)    | 0.2(3)      |
| C(6)-C(7)-C(8)-C(9)     | -174.4(2)   |
| C(7)-C(8)-C(9)-O(1)     | 179.9(2)    |
| C(7)-C(8)-C(9)-C(16)    | 1.1(4)      |
| O(1)-C(10)-C(11)-C(12)  | -179.8(2)   |
| C(15)-C(10)-C(11)-C(12) | -1.0(4)     |
| C(10)-C(11)-C(12)-C(13) | 0.9(4)      |
| C(11)-C(12)-C(13)-C(14) | -0.2(4)     |
| C(12)-C(13)-C(14)-C(15) | -0.5(4)     |
| C(11)-C(10)-C(15)-C(14) | 0.3(4)      |
| O(1)-C(10)-C(15)-C(14)  | 179.3(2)    |
| C(11)-C(10)-C(15)-C(16) | -179.1(2)   |
| O(1)-C(10)-C(15)-C(16)  | -0.1(3)     |
| C(13)-C(14)-C(15)-C(10) | 0.5(3)      |
| C(13)-C(14)-C(15)-C(16) | 179.6(3)    |
| C(8)-C(9)-C(16)-C(17)   | -1.5(4)     |
| O(1)-C(9)-C(16)-C(17)   | 179.6(2)    |
| C(8)-C(9)-C(16)-C(15)   | 177.7(2)    |
| O(1)-C(9)-C(16)-C(15)   | -1.2(3)     |
| C(10)-C(15)-C(16)-C(9)  | 0.7(3)      |
| C(14)-C(15)-C(16)-C(9)  | -178.4(3)   |
| C(10)-C(15)-C(16)-C(17) | 179.8(3)    |



|                         |           |
|-------------------------|-----------|
| C(14)-C(15)-C(16)-C(17) | 0.6(5)    |
| C(9)-C(16)-C(17)-C(18)  | 0.7(3)    |
| C(15)-C(16)-C(17)-C(18) | -178.3(3) |
| C(16)-C(17)-C(18)-C(7)  | 0.5(4)    |
| C(8)-C(7)-C(18)-C(17)   | -1.0(4)   |
| C(6)-C(7)-C(18)-C(17)   | 173.3(2)  |
| C(8)-C(9)-O(1)-C(10)    | -177.8(2) |
| C(16)-C(9)-O(1)-C(10)   | 1.2(3)    |
| C(11)-C(10)-O(1)-C(9)   | 178.4(2)  |
| C(15)-C(10)-O(1)-C(9)   | -0.6(3)   |

---

Symmetry transformations used to generate equivalent atoms:

Table 7. Hydrogen bonds for jwdml220324 [Å and deg.].

---

| D-H...A | d(D-H) | d(H...A) | d(D...A) | <(DHA) |
|---------|--------|----------|----------|--------|
|---------|--------|----------|----------|--------|

Table 1. Crystal data and structure refinement for **22**.

|                                 |                                                                                                                                            |
|---------------------------------|--------------------------------------------------------------------------------------------------------------------------------------------|
| Identification code             | jwdtst220422                                                                                                                               |
| Empirical formula               | C <sub>19</sub> H <sub>11</sub> F <sub>3</sub> O                                                                                           |
| Formula weight                  | 312.28                                                                                                                                     |
| Temperature                     | 120(2) K                                                                                                                                   |
| Wavelength                      | 0.71073 Å                                                                                                                                  |
| Crystal system, space group     | Triclinic, P -1                                                                                                                            |
| Unit cell dimensions            | a = 9.6217(3) Å    alpha = 89.6190(10) deg.<br>b = 10.1702(3) Å    beta = 78.1910(10) deg.<br>c = 14.7670(5) Å    gamma = 83.7530(10) deg. |
| Volume                          | 1405.86(8) Å <sup>3</sup>                                                                                                                  |
| Z, Calculated density           | 4, 1.475 Mg/m <sup>3</sup>                                                                                                                 |
| Absorption coefficient          | 0.117 mm <sup>-1</sup>                                                                                                                     |
| F(000)                          | 640                                                                                                                                        |
| Crystal size                    | 0.250 x 0.220 x 0.200 mm                                                                                                                   |
| Theta range for data collection | 2.015 to 29.176 deg.                                                                                                                       |
| Limiting indices                | -13 ≤ h ≤ 13, -13 ≤ k ≤ 13, -20 ≤ l ≤ 20                                                                                                   |
| Reflections collected / unique  | 84490 / 7592 [R(int) = 0.0283]                                                                                                             |
| Completeness to theta = 25.242  | 99.9 %                                                                                                                                     |
| Absorption correction           | Semi-empirical from equivalents                                                                                                            |
| Max. and min. transmission      | 0.7458 and 0.7185                                                                                                                          |
| Refinement method               | Full-matrix least-squares on F <sup>2</sup>                                                                                                |
| Data / restraints / parameters  | 7592 / 0 / 415                                                                                                                             |

Goodness-of-fit on  $F^2$  1.042

Final R indices [ $I > 2\sigma(I)$ ]  $R1 = 0.0383$ ,  $wR2 = 0.1050$

R indices (all data)  $R1 = 0.0423$ ,  $wR2 = 0.1093$

Extinction coefficient n/a

Largest diff. peak and hole 0.426 and -0.403 e. $\text{\AA}^{-3}$

Table 2. Atomic coordinates ( $\times 10^4$ ) and equivalent isotropic displacement parameters ( $\text{\AA}^2 \times 10^3$ ) for jwdtst220422.

$U(\text{eq})$  is defined as one third of the trace of the orthogonalized  $U_{ij}$  tensor.

---

|       | x       | y        | z       | $U(\text{eq})$ |
|-------|---------|----------|---------|----------------|
| C(1)  | 1908(1) | 1632(1)  | 3928(1) | 19(1)          |
| C(2)  | 1662(1) | 3011(1)  | 3918(1) | 23(1)          |
| C(3)  | 1572(1) | 3759(1)  | 4717(1) | 29(1)          |
| C(4)  | 1705(1) | 3141(1)  | 5541(1) | 31(1)          |
| C(5)  | 1931(1) | 1772(1)  | 5564(1) | 29(1)          |
| C(6)  | 2038(1) | 1022(1)  | 4763(1) | 23(1)          |
| C(7)  | 1955(1) | 828(1)   | 3086(1) | 20(1)          |
| C(8)  | 1195(1) | -278(1)  | 3161(1) | 25(1)          |
| C(9)  | 1148(1) | -1063(1) | 2399(1) | 30(1)          |
| C(10) | 1881(1) | -788(1)  | 1518(1) | 29(1)          |
| C(11) | 2646(1) | 297(1)   | 1452(1) | 24(1)          |
| C(12) | 4091(1) | 1748(1)  | 854(1)  | 23(1)          |
| C(13) | 5015(1) | 2416(1)  | 218(1)  | 26(1)          |
| C(14) | 5540(1) | 3495(1)  | 549(1)  | 25(1)          |
| C(15) | 5146(1) | 3859(1)  | 1486(1) | 21(1)          |
| C(16) | 4230(1) | 3162(1)  | 2120(1) | 20(1)          |
| C(17) | 3671(1) | 2087(1)  | 1799(1) | 20(1)          |
| C(18) | 2708(1) | 1120(1)  | 2197(1) | 20(1)          |
| C(19) | 5643(1) | 5077(1)  | 1819(1) | 25(1)          |
| C(20) | 6710(1) | 1981(1)  | 3979(1) | 20(1)          |
| C(21) | 8008(1) | 2128(1)  | 4235(1) | 21(1)          |
| C(22) | 8032(1) | 2736(1)  | 5069(1) | 24(1)          |
| C(23) | 6762(1) | 3234(1)  | 5654(1) | 31(1)          |
| C(24) | 5471(1) | 3130(1)  | 5393(1) | 34(1)          |
| C(25) | 5442(1) | 2502(1)  | 4565(1) | 26(1)          |
| C(26) | 6687(1) | 1173(1)  | 3151(1) | 19(1)          |

---

|       |          |         |         |       |
|-------|----------|---------|---------|-------|
| C(27) | 5773(1)  | 179(1)  | 3232(1) | 23(1) |
| C(28) | 5785(1)  | -697(1) | 2504(1) | 26(1) |
| C(29) | 6716(1)  | -618(1) | 1657(1) | 27(1) |
| C(30) | 7599(1)  | 384(1)  | 1579(1) | 23(1) |
| C(31) | 9173(1)  | 1718(1) | 967(1)  | 23(1) |
| C(32) | 10161(1) | 2310(1) | 324(1)  | 27(1) |
| C(33) | 10617(1) | 3460(1) | 607(1)  | 25(1) |
| C(34) | 10087(1) | 3972(1) | 1504(1) | 21(1) |
| C(35) | 9111(1)  | 3348(1) | 2149(1) | 20(1) |
| C(36) | 8643(1)  | 2188(1) | 1877(1) | 20(1) |
| C(37) | 7615(1)  | 1285(1) | 2289(1) | 20(1) |
| C(38) | 10497(1) | 5281(1) | 1756(1) | 24(1) |
| O(1)  | 3479(1)  | 669(1)  | 632(1)  | 27(1) |
| O(2)  | 8560(1)  | 621(1)  | 776(1)  | 26(1) |
| F(1)  | 5966(1)  | 4936(1) | 2660(1) | 32(1) |
| F(2)  | 6801(1)  | 5453(1) | 1249(1) | 37(1) |
| F(3)  | 4629(1)  | 6124(1) | 1898(1) | 36(1) |
| F(4)  | 10713(1) | 5337(1) | 2621(1) | 39(1) |
| F(5)  | 11670(1) | 5621(1) | 1202(1) | 54(1) |
| F(6)  | 9471(1)  | 6275(1) | 1720(1) | 45(1) |

---

Table 3. Bond lengths [Å] and angles [deg] for jwdtst220422.

---

|             |            |
|-------------|------------|
| C(1)-C(2)   | 1.3966(13) |
| C(1)-C(6)   | 1.3996(13) |
| C(1)-C(7)   | 1.4822(13) |
| C(2)-C(3)   | 1.3897(15) |
| C(2)-H(2)   | 0.9500     |
| C(3)-C(4)   | 1.3893(18) |
| C(3)-H(3)   | 0.9500     |
| C(4)-C(5)   | 1.3872(17) |
| C(4)-H(4)   | 0.9500     |
| C(5)-C(6)   | 1.3906(15) |
| C(5)-H(5)   | 0.9500     |
| C(6)-H(6)   | 0.9500     |
| C(7)-C(8)   | 1.3992(13) |
| C(7)-C(18)  | 1.4105(13) |
| C(8)-C(9)   | 1.3956(15) |
| C(8)-H(8)   | 0.9500     |
| C(9)-C(10)  | 1.3893(16) |
| C(9)-H(9)   | 0.9500     |
| C(10)-C(11) | 1.3843(14) |
| C(10)-H(10) | 0.9500     |
| C(11)-O(1)  | 1.3830(12) |
| C(11)-C(18) | 1.4013(14) |

|             |            |
|-------------|------------|
| C(12)-O(1)  | 1.3721(12) |
| C(12)-C(13) | 1.3840(14) |
| C(12)-C(17) | 1.4052(13) |
| C(13)-C(14) | 1.3871(15) |
| C(13)-H(13) | 0.9500     |
| C(14)-C(15) | 1.4000(14) |
| C(14)-H(14) | 0.9500     |
| C(15)-C(16) | 1.3938(12) |
| C(15)-C(19) | 1.4964(14) |
| C(16)-C(17) | 1.3962(13) |
| C(16)-H(16) | 0.9500     |
| C(17)-C(18) | 1.4625(13) |
| C(19)-F(2)  | 1.3419(11) |
| C(19)-F(1)  | 1.3432(12) |
| C(19)-F(3)  | 1.3516(13) |
| C(20)-C(25) | 1.3967(13) |
| C(20)-C(21) | 1.3998(13) |
| C(20)-C(26) | 1.4828(13) |
| C(21)-C(22) | 1.3875(14) |
| C(21)-H(21) | 0.9500     |
| C(22)-C(23) | 1.3909(15) |
| C(22)-H(22) | 0.9500     |
| C(23)-C(24) | 1.3889(16) |
| C(23)-H(23) | 0.9500     |
| C(24)-C(25) | 1.3902(15) |
| C(24)-H(24) | 0.9500     |
| C(25)-H(25) | 0.9500     |
| C(26)-C(27) | 1.3999(13) |
| C(26)-C(37) | 1.4096(13) |
| C(27)-C(28) | 1.3979(15) |
| C(27)-H(27) | 0.9500     |
| C(28)-C(29) | 1.3893(15) |
| C(28)-H(28) | 0.9500     |
| C(29)-C(30) | 1.3850(14) |
| C(29)-H(29) | 0.9500     |
| C(30)-O(2)  | 1.3840(12) |
| C(30)-C(37) | 1.4009(13) |
| C(31)-O(2)  | 1.3735(12) |
| C(31)-C(32) | 1.3838(14) |
| C(31)-C(36) | 1.4043(13) |
| C(32)-C(33) | 1.3880(15) |
| C(32)-H(32) | 0.9500     |
| C(33)-C(34) | 1.4008(14) |
| C(33)-H(33) | 0.9500     |
| C(34)-C(35) | 1.3955(13) |
| C(34)-C(38) | 1.4984(14) |
| C(35)-C(36) | 1.3970(13) |

|                   |            |
|-------------------|------------|
| C(35)-H(35)       | 0.9500     |
| C(36)-C(37)       | 1.4611(13) |
| C(38)-F(5)        | 1.3294(12) |
| C(38)-F(4)        | 1.3387(12) |
| C(38)-F(6)        | 1.3428(13) |
|                   |            |
| C(2)-C(1)-C(6)    | 118.37(9)  |
| C(2)-C(1)-C(7)    | 120.92(9)  |
| C(6)-C(1)-C(7)    | 120.63(9)  |
| C(3)-C(2)-C(1)    | 120.77(10) |
| C(3)-C(2)-H(2)    | 119.6      |
| C(1)-C(2)-H(2)    | 119.6      |
| C(4)-C(3)-C(2)    | 120.28(10) |
| C(4)-C(3)-H(3)    | 119.9      |
| C(2)-C(3)-H(3)    | 119.9      |
| C(5)-C(4)-C(3)    | 119.59(10) |
| C(5)-C(4)-H(4)    | 120.2      |
| C(3)-C(4)-H(4)    | 120.2      |
| C(4)-C(5)-C(6)    | 120.20(10) |
| C(4)-C(5)-H(5)    | 119.9      |
| C(6)-C(5)-H(5)    | 119.9      |
| C(5)-C(6)-C(1)    | 120.78(10) |
| C(5)-C(6)-H(6)    | 119.6      |
| C(1)-C(6)-H(6)    | 119.6      |
| C(8)-C(7)-C(18)   | 117.09(9)  |
| C(8)-C(7)-C(1)    | 118.95(8)  |
| C(18)-C(7)-C(1)   | 123.95(8)  |
| C(9)-C(8)-C(7)    | 122.56(9)  |
| C(9)-C(8)-H(8)    | 118.7      |
| C(7)-C(8)-H(8)    | 118.7      |
| C(10)-C(9)-C(8)   | 121.11(10) |
| C(10)-C(9)-H(9)   | 119.4      |
| C(8)-C(9)-H(9)    | 119.4      |
| C(11)-C(10)-C(9)  | 115.93(10) |
| C(11)-C(10)-H(10) | 122.0      |
| C(9)-C(10)-H(10)  | 122.0      |
| O(1)-C(11)-C(10)  | 123.05(9)  |
| O(1)-C(11)-C(18)  | 112.11(8)  |
| C(10)-C(11)-C(18) | 124.82(10) |
| O(1)-C(12)-C(13)  | 123.70(9)  |
| O(1)-C(12)-C(17)  | 112.03(8)  |
| C(13)-C(12)-C(17) | 124.27(10) |
| C(12)-C(13)-C(14) | 116.88(9)  |
| C(12)-C(13)-H(13) | 121.6      |
| C(14)-C(13)-H(13) | 121.6      |
| C(13)-C(14)-C(15) | 120.34(9)  |
| C(13)-C(14)-H(14) | 119.8      |

|                   |            |
|-------------------|------------|
| C(15)-C(14)-H(14) | 119.8      |
| C(16)-C(15)-C(14) | 122.04(9)  |
| C(16)-C(15)-C(19) | 118.22(9)  |
| C(14)-C(15)-C(19) | 119.64(9)  |
| C(15)-C(16)-C(17) | 118.51(9)  |
| C(15)-C(16)-H(16) | 120.7      |
| C(17)-C(16)-H(16) | 120.7      |
| C(16)-C(17)-C(12) | 117.94(9)  |
| C(16)-C(17)-C(18) | 136.76(9)  |
| C(12)-C(17)-C(18) | 105.29(8)  |
| C(11)-C(18)-C(7)  | 118.49(9)  |
| C(11)-C(18)-C(17) | 104.95(8)  |
| C(7)-C(18)-C(17)  | 136.49(9)  |
| F(2)-C(19)-F(1)   | 106.90(8)  |
| F(2)-C(19)-F(3)   | 106.00(8)  |
| F(1)-C(19)-F(3)   | 105.72(9)  |
| F(2)-C(19)-C(15)  | 113.07(9)  |
| F(1)-C(19)-C(15)  | 112.77(8)  |
| F(3)-C(19)-C(15)  | 111.84(9)  |
| C(25)-C(20)-C(21) | 118.63(9)  |
| C(25)-C(20)-C(26) | 120.95(8)  |
| C(21)-C(20)-C(26) | 120.14(8)  |
| C(22)-C(21)-C(20) | 120.64(9)  |
| C(22)-C(21)-H(21) | 119.7      |
| C(20)-C(21)-H(21) | 119.7      |
| C(21)-C(22)-C(23) | 120.28(9)  |
| C(21)-C(22)-H(22) | 119.9      |
| C(23)-C(22)-H(22) | 119.9      |
| C(24)-C(23)-C(22) | 119.48(10) |
| C(24)-C(23)-H(23) | 120.3      |
| C(22)-C(23)-H(23) | 120.3      |
| C(23)-C(24)-C(25) | 120.39(10) |
| C(23)-C(24)-H(24) | 119.8      |
| C(25)-C(24)-H(24) | 119.8      |
| C(24)-C(25)-C(20) | 120.53(9)  |
| C(24)-C(25)-H(25) | 119.7      |
| C(20)-C(25)-H(25) | 119.7      |
| C(27)-C(26)-C(37) | 117.22(9)  |
| C(27)-C(26)-C(20) | 119.21(8)  |
| C(37)-C(26)-C(20) | 123.42(8)  |
| C(28)-C(27)-C(26) | 122.31(9)  |
| C(28)-C(27)-H(27) | 118.8      |
| C(26)-C(27)-H(27) | 118.8      |
| C(29)-C(28)-C(27) | 121.14(9)  |
| C(29)-C(28)-H(28) | 119.4      |
| C(27)-C(28)-H(28) | 119.4      |
| C(30)-C(29)-C(28) | 116.07(10) |

|                   |           |
|-------------------|-----------|
| C(30)-C(29)-H(29) | 122.0     |
| C(28)-C(29)-H(29) | 122.0     |
| O(2)-C(30)-C(29)  | 123.43(9) |
| O(2)-C(30)-C(37)  | 111.95(8) |
| C(29)-C(30)-C(37) | 124.61(9) |
| O(2)-C(31)-C(32)  | 123.71(9) |
| O(2)-C(31)-C(36)  | 112.02(8) |
| C(32)-C(31)-C(36) | 124.24(9) |
| C(31)-C(32)-C(33) | 116.77(9) |
| C(31)-C(32)-H(32) | 121.6     |
| C(33)-C(32)-H(32) | 121.6     |
| C(32)-C(33)-C(34) | 120.48(9) |
| C(32)-C(33)-H(33) | 119.8     |
| C(34)-C(33)-H(33) | 119.8     |
| C(35)-C(34)-C(33) | 122.00(9) |
| C(35)-C(34)-C(38) | 118.95(9) |
| C(33)-C(34)-C(38) | 118.90(9) |
| C(34)-C(35)-C(36) | 118.29(9) |
| C(34)-C(35)-H(35) | 120.9     |
| C(36)-C(35)-H(35) | 120.9     |
| C(35)-C(36)-C(31) | 118.20(9) |
| C(35)-C(36)-C(37) | 136.43(9) |
| C(31)-C(36)-C(37) | 105.27(8) |
| C(30)-C(37)-C(26) | 118.63(9) |
| C(30)-C(37)-C(36) | 105.11(8) |
| C(26)-C(37)-C(36) | 136.20(9) |
| F(5)-C(38)-F(4)   | 106.76(9) |
| F(5)-C(38)-F(6)   | 105.83(9) |
| F(4)-C(38)-F(6)   | 104.49(9) |
| F(5)-C(38)-C(34)  | 113.47(9) |
| F(4)-C(38)-C(34)  | 113.40(8) |
| F(6)-C(38)-C(34)  | 112.17(9) |
| C(12)-O(1)-C(11)  | 105.61(8) |
| C(31)-O(2)-C(30)  | 105.60(8) |

---

Symmetry transformations used to generate equivalent atoms:



Table 4. Anisotropic displacement parameters ( $\text{Å}^2 \times 10^3$ ) for jwdtst220422.  
 The anisotropic displacement factor exponent takes the form:  
 $-2 \pi^2 [ h^2 a^{*2} U_{11} + \dots + 2 h k a^* b^* U_{12} ]$

|       | U11   | U22   | U33   | U23    | U13   | U12    |
|-------|-------|-------|-------|--------|-------|--------|
| C(1)  | 14(1) | 20(1) | 22(1) | 2(1)   | -1(1) | -5(1)  |
| C(2)  | 16(1) | 21(1) | 29(1) | 4(1)   | 2(1)  | -4(1)  |
| C(3)  | 19(1) | 24(1) | 40(1) | -6(1)  | 4(1)  | -7(1)  |
| C(4)  | 18(1) | 43(1) | 31(1) | -11(1) | 2(1)  | -9(1)  |
| C(5)  | 19(1) | 44(1) | 23(1) | 3(1)   | -2(1) | -9(1)  |
| C(6)  | 18(1) | 25(1) | 26(1) | 6(1)   | -2(1) | -6(1)  |
| C(7)  | 16(1) | 19(1) | 24(1) | 2(1)   | -2(1) | -4(1)  |
| C(8)  | 22(1) | 22(1) | 29(1) | 2(1)   | -1(1) | -8(1)  |
| C(9)  | 28(1) | 25(1) | 36(1) | -2(1)  | -3(1) | -11(1) |
| C(10) | 29(1) | 28(1) | 31(1) | -5(1)  | -4(1) | -9(1)  |
| C(11) | 22(1) | 26(1) | 23(1) | 0(1)   | -2(1) | -5(1)  |
| C(12) | 23(1) | 24(1) | 22(1) | 1(1)   | -3(1) | -4(1)  |
| C(13) | 28(1) | 30(1) | 19(1) | 2(1)   | 1(1)  | -4(1)  |
| C(14) | 23(1) | 27(1) | 22(1) | 6(1)   | 2(1)  | -4(1)  |
| C(15) | 18(1) | 22(1) | 22(1) | 5(1)   | -1(1) | -4(1)  |
| C(16) | 18(1) | 22(1) | 19(1) | 4(1)   | -1(1) | -4(1)  |
| C(17) | 17(1) | 21(1) | 19(1) | 4(1)   | -2(1) | -3(1)  |
| C(18) | 17(1) | 20(1) | 22(1) | 2(1)   | -4(1) | -3(1)  |
| C(19) | 22(1) | 27(1) | 24(1) | 5(1)   | 0(1)  | -8(1)  |
| C(20) | 19(1) | 20(1) | 20(1) | 3(1)   | -2(1) | -6(1)  |
| C(21) | 18(1) | 20(1) | 25(1) | 4(1)   | -2(1) | -6(1)  |
| C(22) | 22(1) | 25(1) | 27(1) | 3(1)   | -6(1) | -11(1) |
| C(23) | 30(1) | 38(1) | 24(1) | -5(1)  | -1(1) | -15(1) |
| C(24) | 22(1) | 47(1) | 29(1) | -10(1) | 4(1)  | -11(1) |
| C(25) | 18(1) | 35(1) | 26(1) | -3(1)  | 0(1)  | -8(1)  |
| C(26) | 16(1) | 20(1) | 22(1) | 2(1)   | -4(1) | -3(1)  |
| C(27) | 19(1) | 24(1) | 27(1) | 4(1)   | -4(1) | -7(1)  |
| C(28) | 24(1) | 23(1) | 33(1) | 2(1)   | -9(1) | -8(1)  |
| C(29) | 28(1) | 24(1) | 30(1) | -2(1)  | -7(1) | -7(1)  |
| C(30) | 23(1) | 22(1) | 23(1) | 0(1)   | -3(1) | -3(1)  |
| C(31) | 24(1) | 21(1) | 23(1) | 0(1)   | -2(1) | -3(1)  |
| C(32) | 29(1) | 27(1) | 21(1) | -1(1)  | 3(1)  | -3(1)  |
| C(33) | 24(1) | 26(1) | 23(1) | 5(1)   | 2(1)  | -4(1)  |
| C(34) | 19(1) | 21(1) | 23(1) | 4(1)   | -2(1) | -4(1)  |
| C(35) | 19(1) | 20(1) | 20(1) | 2(1)   | -1(1) | -3(1)  |
| C(36) | 18(1) | 20(1) | 21(1) | 2(1)   | -1(1) | -2(1)  |
| C(37) | 18(1) | 19(1) | 22(1) | 2(1)   | -3(1) | -3(1)  |
| C(38) | 25(1) | 24(1) | 24(1) | 7(1)   | -2(1) | -8(1)  |

|      |       |       |       |        |        |        |
|------|-------|-------|-------|--------|--------|--------|
| O(1) | 29(1) | 29(1) | 22(1) | -2(1)  | -2(1)  | -8(1)  |
| O(2) | 30(1) | 25(1) | 23(1) | -3(1)  | 0(1)   | -7(1)  |
| F(1) | 38(1) | 35(1) | 26(1) | 3(1)   | -7(1)  | -14(1) |
| F(2) | 33(1) | 45(1) | 33(1) | 4(1)   | 5(1)   | -23(1) |
| F(3) | 37(1) | 22(1) | 48(1) | 2(1)   | -7(1)  | -3(1)  |
| F(4) | 63(1) | 28(1) | 32(1) | 7(1)   | -20(1) | -15(1) |
| F(5) | 51(1) | 57(1) | 48(1) | -11(1) | 18(1)  | -38(1) |
| F(6) | 50(1) | 20(1) | 74(1) | 4(1)   | -32(1) | -4(1)  |

Table 5. Hydrogen coordinates ( $\times 10^4$ ) and isotropic displacement parameters ( $\text{\AA}^2 \times 10^3$ ) for jwdtst220422.

|       | x     | y     | z    | U(eq) |
|-------|-------|-------|------|-------|
| H(2)  | 1555  | 3442  | 3360 | 27    |
| H(3)  | 1419  | 4696  | 4698 | 35    |
| H(4)  | 1641  | 3654  | 6087 | 37    |
| H(5)  | 2012  | 1345  | 6127 | 34    |
| H(6)  | 2203  | 86    | 4783 | 27    |
| H(8)  | 692   | -504  | 3754 | 30    |
| H(9)  | 605   | -1797 | 2483 | 36    |
| H(10) | 1857  | -1313 | 992  | 35    |
| H(13) | 5278  | 2149  | -414 | 32    |
| H(14) | 6171  | 3989  | 136  | 30    |
| H(16) | 3992  | 3414  | 2756 | 24    |
| H(21) | 8881  | 1808  | 3834 | 25    |
| H(22) | 8919  | 2813  | 5241 | 29    |
| H(23) | 6778  | 3642  | 6228 | 37    |
| H(24) | 4602  | 3490  | 5782 | 40    |
| H(25) | 4552  | 2427  | 4396 | 32    |
| H(27) | 5120  | 96    | 3802 | 28    |
| H(28) | 5146  | -1358 | 2590 | 31    |
| H(29) | 6746  | -1216 | 1160 | 32    |
| H(32) | 10511 | 1948  | -281 | 32    |
| H(33) | 11293 | 3903  | 189  | 30    |
| H(35) | 8774  | 3702  | 2758 | 24    |

Table 6. Torsion angles [deg] for jwdtst220422.

---

|                         |             |
|-------------------------|-------------|
| C(6)-C(1)-C(2)-C(3)     | 1.01(14)    |
| C(7)-C(1)-C(2)-C(3)     | 177.88(9)   |
| C(1)-C(2)-C(3)-C(4)     | -0.96(15)   |
| C(2)-C(3)-C(4)-C(5)     | 0.11(15)    |
| C(3)-C(4)-C(5)-C(6)     | 0.67(15)    |
| C(4)-C(5)-C(6)-C(1)     | -0.62(15)   |
| C(2)-C(1)-C(6)-C(5)     | -0.22(14)   |
| C(7)-C(1)-C(6)-C(5)     | -177.10(9)  |
| C(2)-C(1)-C(7)-C(8)     | -133.26(10) |
| C(6)-C(1)-C(7)-C(8)     | 43.55(13)   |
| C(2)-C(1)-C(7)-C(18)    | 45.71(13)   |
| C(6)-C(1)-C(7)-C(18)    | -137.49(10) |
| C(18)-C(7)-C(8)-C(9)    | -1.06(15)   |
| C(1)-C(7)-C(8)-C(9)     | 177.98(10)  |
| C(7)-C(8)-C(9)-C(10)    | 0.93(17)    |
| C(8)-C(9)-C(10)-C(11)   | 0.05(17)    |
| C(9)-C(10)-C(11)-O(1)   | 177.26(10)  |
| C(9)-C(10)-C(11)-C(18)  | -0.88(17)   |
| O(1)-C(12)-C(13)-C(14)  | 179.63(9)   |
| C(17)-C(12)-C(13)-C(14) | -0.51(16)   |
| C(12)-C(13)-C(14)-C(15) | 0.58(15)    |
| C(13)-C(14)-C(15)-C(16) | 0.35(15)    |
| C(13)-C(14)-C(15)-C(19) | -175.91(10) |
| C(14)-C(15)-C(16)-C(17) | -1.38(15)   |
| C(19)-C(15)-C(16)-C(17) | 174.93(9)   |
| C(15)-C(16)-C(17)-C(12) | 1.42(14)    |
| C(15)-C(16)-C(17)-C(18) | -179.65(10) |
| O(1)-C(12)-C(17)-C(16)  | 179.37(8)   |
| C(13)-C(12)-C(17)-C(16) | -0.51(15)   |
| O(1)-C(12)-C(17)-C(18)  | 0.12(11)    |
| C(13)-C(12)-C(17)-C(18) | -179.75(10) |
| O(1)-C(11)-C(18)-C(7)   | -177.58(8)  |
| C(10)-C(11)-C(18)-C(7)  | 0.73(16)    |
| O(1)-C(11)-C(18)-C(17)  | -0.12(11)   |
| C(10)-C(11)-C(18)-C(17) | 178.19(10)  |
| C(8)-C(7)-C(18)-C(11)   | 0.25(14)    |
| C(1)-C(7)-C(18)-C(11)   | -178.73(9)  |
| C(8)-C(7)-C(18)-C(17)   | -176.18(10) |
| C(1)-C(7)-C(18)-C(17)   | 4.84(17)    |
| C(16)-C(17)-C(18)-C(11) | -179.03(11) |
| C(12)-C(17)-C(18)-C(11) | 0.00(10)    |
| C(16)-C(17)-C(18)-C(7)  | -2.3(2)     |
| C(12)-C(17)-C(18)-C(7)  | 176.75(11)  |
| C(16)-C(15)-C(19)-F(2)  | 162.29(9)   |

|                         |             |
|-------------------------|-------------|
| C(14)-C(15)-C(19)-F(2)  | -21.30(14)  |
| C(16)-C(15)-C(19)-F(1)  | 40.86(13)   |
| C(14)-C(15)-C(19)-F(1)  | -142.73(9)  |
| C(16)-C(15)-C(19)-F(3)  | -78.14(11)  |
| C(14)-C(15)-C(19)-F(3)  | 98.27(11)   |
| C(25)-C(20)-C(21)-C(22) | 2.31(14)    |
| C(26)-C(20)-C(21)-C(22) | -171.70(9)  |
| C(20)-C(21)-C(22)-C(23) | -1.37(15)   |
| C(21)-C(22)-C(23)-C(24) | -0.66(17)   |
| C(22)-C(23)-C(24)-C(25) | 1.72(19)    |
| C(23)-C(24)-C(25)-C(20) | -0.75(18)   |
| C(21)-C(20)-C(25)-C(24) | -1.26(16)   |
| C(26)-C(20)-C(25)-C(24) | 172.70(10)  |
| C(25)-C(20)-C(26)-C(27) | -45.60(13)  |
| C(21)-C(20)-C(26)-C(27) | 128.27(10)  |
| C(25)-C(20)-C(26)-C(37) | 139.02(10)  |
| C(21)-C(20)-C(26)-C(37) | -47.11(13)  |
| C(37)-C(26)-C(27)-C(28) | 1.51(14)    |
| C(20)-C(26)-C(27)-C(28) | -174.16(9)  |
| C(26)-C(27)-C(28)-C(29) | -0.09(16)   |
| C(27)-C(28)-C(29)-C(30) | -1.00(16)   |
| C(28)-C(29)-C(30)-O(2)  | -178.29(10) |
| C(28)-C(29)-C(30)-C(37) | 0.68(16)    |
| O(2)-C(31)-C(32)-C(33)  | 176.19(10)  |
| C(36)-C(31)-C(32)-C(33) | -1.58(16)   |
| C(31)-C(32)-C(33)-C(34) | 0.16(16)    |
| C(32)-C(33)-C(34)-C(35) | 1.11(16)    |
| C(32)-C(33)-C(34)-C(38) | -174.31(10) |
| C(33)-C(34)-C(35)-C(36) | -1.00(15)   |
| C(38)-C(34)-C(35)-C(36) | 174.42(9)   |
| C(34)-C(35)-C(36)-C(31) | -0.35(14)   |
| C(34)-C(35)-C(36)-C(37) | -176.02(10) |
| O(2)-C(31)-C(36)-C(35)  | -176.31(8)  |
| C(32)-C(31)-C(36)-C(35) | 1.69(16)    |
| O(2)-C(31)-C(36)-C(37)  | 0.60(11)    |
| C(32)-C(31)-C(36)-C(37) | 178.60(10)  |
| O(2)-C(30)-C(37)-C(26)  | 179.80(8)   |
| C(29)-C(30)-C(37)-C(26) | 0.73(15)    |
| O(2)-C(30)-C(37)-C(36)  | 2.11(11)    |
| C(29)-C(30)-C(37)-C(36) | -176.96(10) |
| C(27)-C(26)-C(37)-C(30) | -1.77(13)   |
| C(20)-C(26)-C(37)-C(30) | 173.69(9)   |
| C(27)-C(26)-C(37)-C(36) | 175.00(10)  |
| C(20)-C(26)-C(37)-C(36) | -9.53(17)   |
| C(35)-C(36)-C(37)-C(30) | 174.46(11)  |
| C(31)-C(36)-C(37)-C(30) | -1.59(10)   |
| C(35)-C(36)-C(37)-C(26) | -2.6(2)     |

|                         |             |
|-------------------------|-------------|
| C(31)-C(36)-C(37)-C(26) | -178.66(11) |
| C(35)-C(34)-C(38)-F(5)  | 164.07(10)  |
| C(33)-C(34)-C(38)-F(5)  | -20.37(14)  |
| C(35)-C(34)-C(38)-F(4)  | 42.03(13)   |
| C(33)-C(34)-C(38)-F(4)  | -142.41(10) |
| C(35)-C(34)-C(38)-F(6)  | -76.06(12)  |
| C(33)-C(34)-C(38)-F(6)  | 99.50(11)   |
| C(13)-C(12)-O(1)-C(11)  | 179.68(10)  |
| C(17)-C(12)-O(1)-C(11)  | -0.20(11)   |
| C(10)-C(11)-O(1)-C(12)  | -178.15(10) |
| C(18)-C(11)-O(1)-C(12)  | 0.20(11)    |
| C(32)-C(31)-O(2)-C(30)  | -177.35(10) |
| C(36)-C(31)-O(2)-C(30)  | 0.66(11)    |
| C(29)-C(30)-O(2)-C(31)  | 177.33(10)  |
| C(37)-C(30)-O(2)-C(31)  | -1.76(11)   |

---

Symmetry transformations used to generate equivalent atoms:

Table 7. Hydrogen bonds for jwdtst220422 [Å and deg.].

---

| D-H...A | d(D-H) | d(H...A) | d(D...A) | <(DHA) |
|---------|--------|----------|----------|--------|
|---------|--------|----------|----------|--------|

## References

- (1) "M86-EXX229V1 APEX3 User Manual", Bruker AXS Inc., Madison, USA, 2016.
- (2) G. M. Sheldrick, *Acta Cryst.* **2015**, A71, 3-8.
- (3) G. M. Sheldrick, *Acta Cryst.* **2015**, C71, 3-8.
- (4) Frisch, M. J.; Trucks, G. W.; Schlegel, H. B.; Scuseria, G. E.; Robb, M. A.; Cheeseman, J. R.; Scalmani, G.; Barone, V.; Petersson, G. A.; Nakatsuji, H.; Li, X.; Caricato, M.; Marenich, A. V.; Bloino, J.; Janesko, B. G.; Gomperts, R.; Mennucci, B.; Hratchian, H. P.; Ortiz, J. V.; Izmaylov, A. F.; Sonnenberg, J. L.; Williams, D.; Ding, F.; Lipparini, F.; Egidi, F.; Goings, J.; Peng, B.; Petrone, A.; Henderson, T.; Ranasinghe, D.; Zakrzewski, V. G.; Gao, J.; Rega, N.; Zheng, G.; Liang, W.; Hada, M.; Ehara, M.; Toyota, K.; Fukuda, R.; Hasegawa, J.; Ishida, M.; Nakajima, T.; Honda, Y.; Kitao, O.; Nakai, H.; Vreven, T.; Throssell, K.; Montgomery Jr., J. A.; Peralta, J. E.; Ogliaro, F.; Bearpark, M. J.; Heyd, J. J.; Brothers, E. N.; Kudin, K. N.; Staroverov, V. N.; Keith, T. A.; Kobayashi, R.; Normand, J.; Raghavachari, K.; Rendell, A. P.; Burant, J. C.; Iyengar, S. S.; Tomasi, J.; Cossi, M.; Millam, J. M.; Klene, M.; Adamo, C.; Cammi, R.; Ochterski, J. W.; Martin, R. L.; Morokuma, K.; Farkas, O.; Foresman, J. B.; Fox, D. J., *Gaussian 16, Rev. A.03*. Gaussian, Inc.: Wallingford, CT, 2016.
- (5) Chai, J.-D.; Head-Gordon, M., Long-range corrected hybrid density functionals with damped atom-atom dispersion corrections. *Phys. Chem. Chem. Phys.* **2008**, 10 (44), 6615-6620.
- (6) Weigend, F.; Ahlrichs, R., Balanced basis sets of split valence, triple zeta valence and quadruple zeta valence quality for H to Rn: Design and assessment of accuracy. *Phys. Chem. Chem. Phys.* **2005**, 7 (18), 3297-3305.
- (7) Andrae, D.; Häußermann, U.; Dolg, M.; Stoll, H.; Preuß, H., Energy-adjusted ab initio pseudopotentials for the second and third row transition elements. *Theor. Chim. Acta* **1990**, 77 (2), 123-141.
- (8) Dolg, M.; Wedig, U.; Stoll, H.; Preuss, H., Energy-adjusted ab initio pseudopotentials for the first row transition elements. *J. Chem. Phys.* **1987**, 86 (2), 866-872.
- (9) Marenich, A. V.; Cramer, C. J.; Truhlar, D. G., Universal Solvation Model Based on Solute Electron Density and on a Continuum Model of the Solvent Defined by the Bulk Dielectric Constant and Atomic Surface Tensions. *J. Phys. Chem. B* **2009**, 113 (18), 6378-6396.
- (10) Luchini, G.; Alegre-Requena, J. V.; Funes-Ardoiz, I.; Paton, R. S., GoodVibes: automated thermochemistry for heterogeneous computational chemistry data. *FI000Research* **2020**, 9 (291).
- (11) Grimme, S., Supramolecular Binding Thermodynamics by Dispersion-Corrected Density Functional Theory. *Chem. Eur. J.* **2012**, 18 (32), 9955-9964.

- (12) Li, Y.-P.; Gomes, J.; Mallikarjun Sharada, S.; Bell, A. T.; Head-Gordon, M., Improved Force-Field Parameters for QM/MM Simulations of the Energies of Adsorption for Molecules in Zeolites and a Free Rotor Correction to the Rigid Rotor Harmonic Oscillator Model for Adsorption Enthalpies. *J. Phys. Chem. C* **2015**, *119* (4), 1840-1850.
- (13) Glendening, E. D.; Badenhop, J. K.; Reed, A. E.; Carpenter, J. E.; Bohmann, J. A.; Morales, C. M.; P. Karafiloglou, P.; Landis, C. R.; Weinhold, F., *NBO 7.0*. Theoretical Chemistry Institute, University of Wisconsin: Madison, 2018.
- (14) Legault, C. Y., *CYLVIEW20*. Université de Sherbrooke: 2020.
- (15) Guerra, W. D.; Rossi, R. A.; Pierini, A. B.; Barolo, S. M. "Transition-Metal-Free" Synthesis of Carbazoles by Photostimulated Reactions of 2'-Halo[1,1'-Biphenyl]-2-Amines. *J. Org. Chem.* **2015**, *80*, 928-941.
- (16) Jiang, M.; Guo, J.; Liu, B.; Tan, Q.; Xu, B. Synthesis of Tellurium-Containing  $\pi$ -Extended Aromatics with Room-Temperature Phosphorescence. *Org. Lett.* **2019**, *21*, 8328-8333.
- (17) Lanzi, M.; Dherbassy, Q.; Wencel-Delord, J. Cyclic Diaryl  $\lambda^3$ -Bromanes as Original Aryne Precursors. *Angew. Chem. Int. Ed.* **2021**, *60*, 14852-14857; Lanzi, M.; Ali Abdine, R. A.; De Abreu, M.; Wencel-Delord, J. Cyclic Diaryl  $\lambda^3$ -Bromanes: A Rapid Access to Molecular Complexity via Cycloaddition Reactions. *Org. Lett.* **2021**, *23*, 9047-9052.

## Copy of NMR spectra



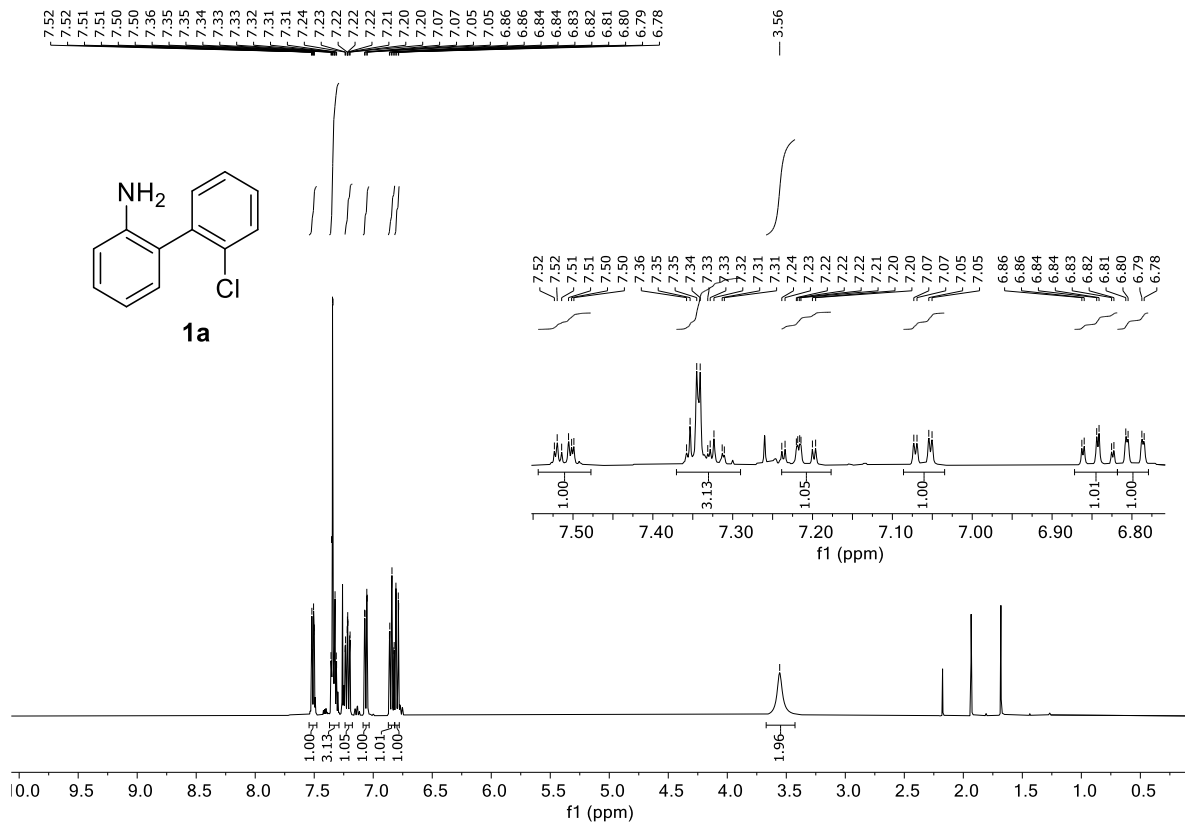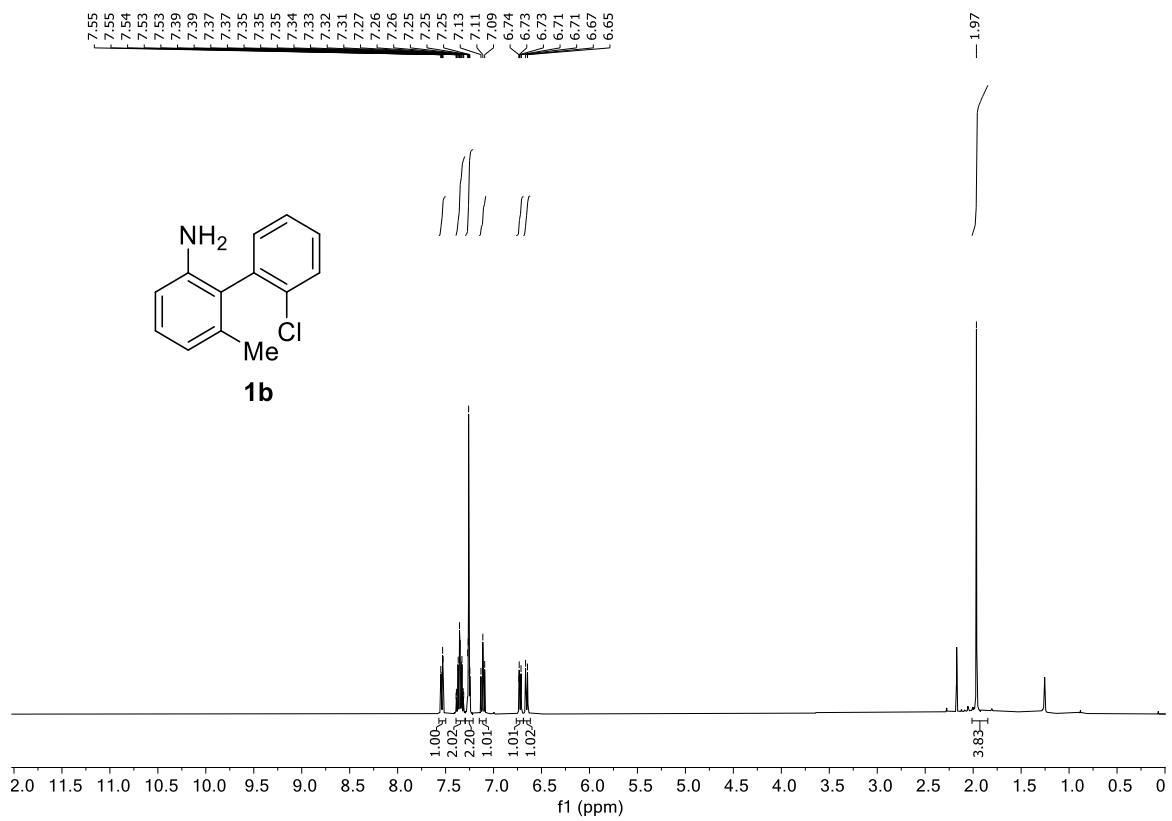

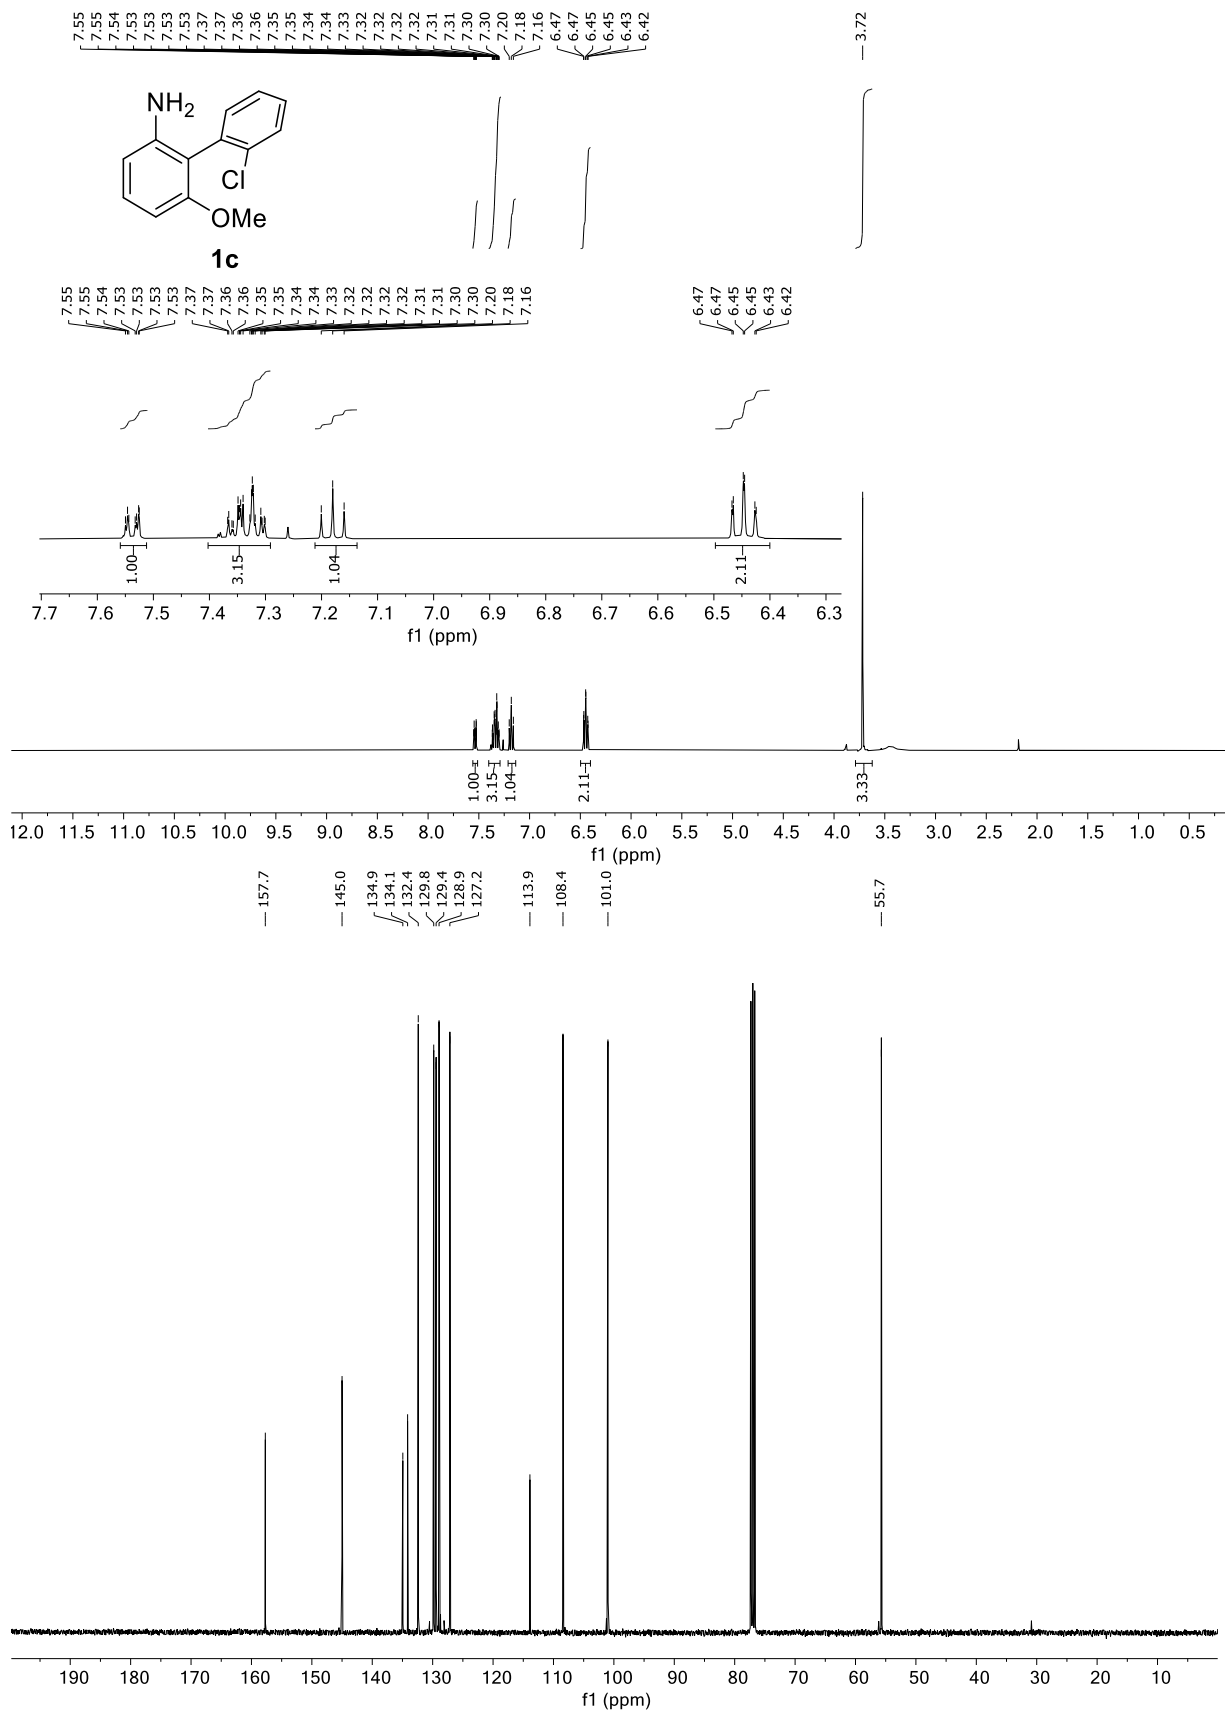

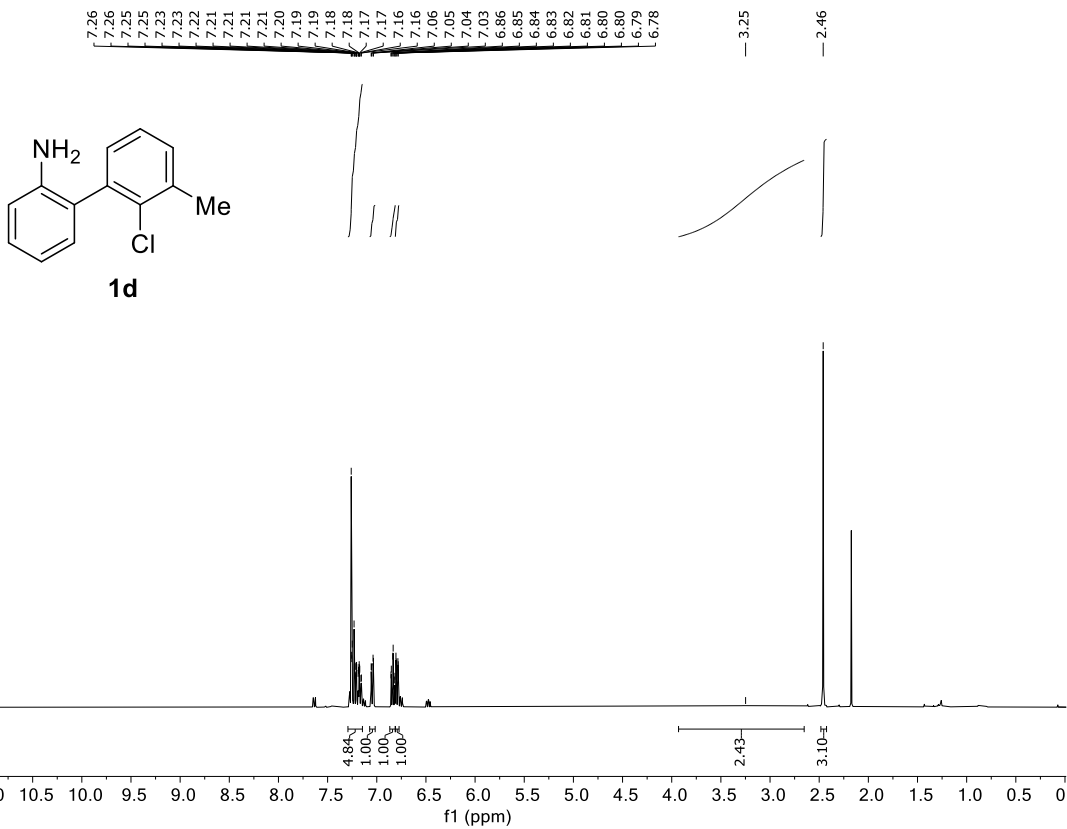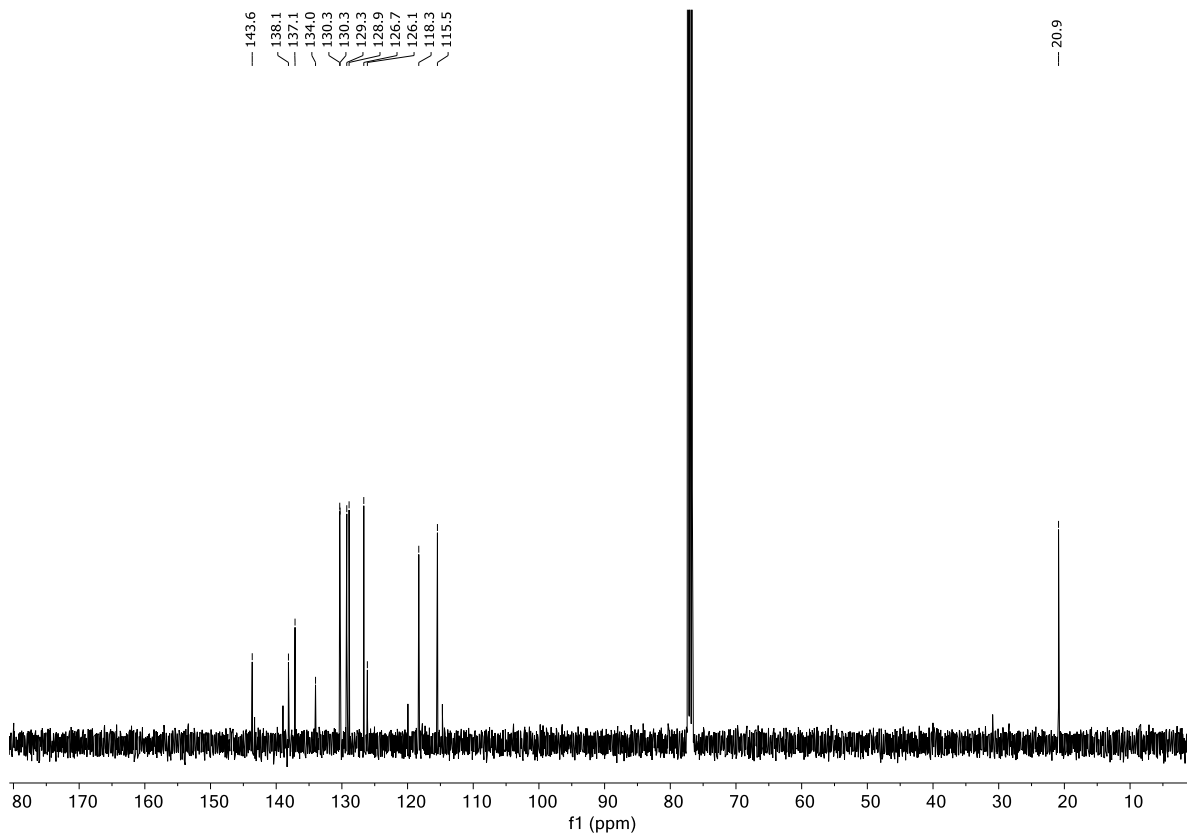

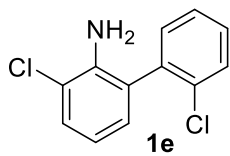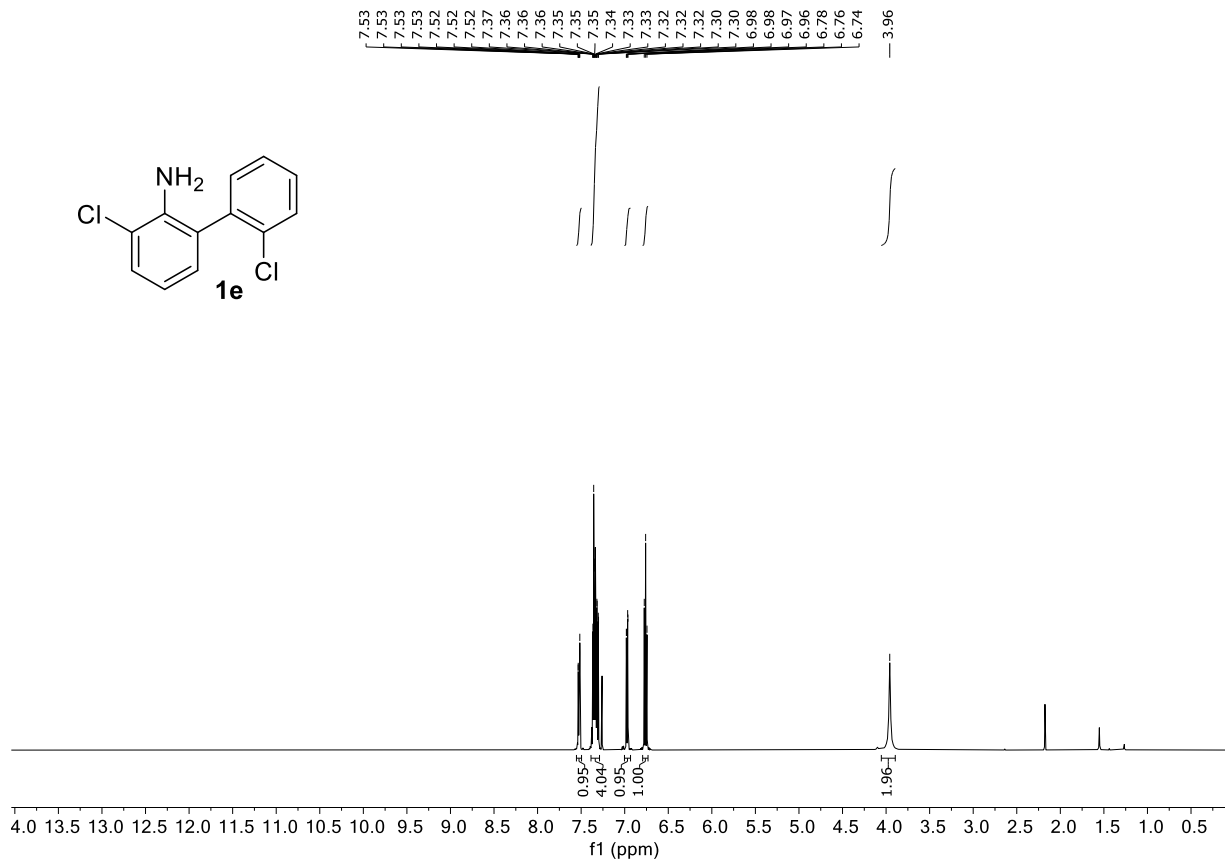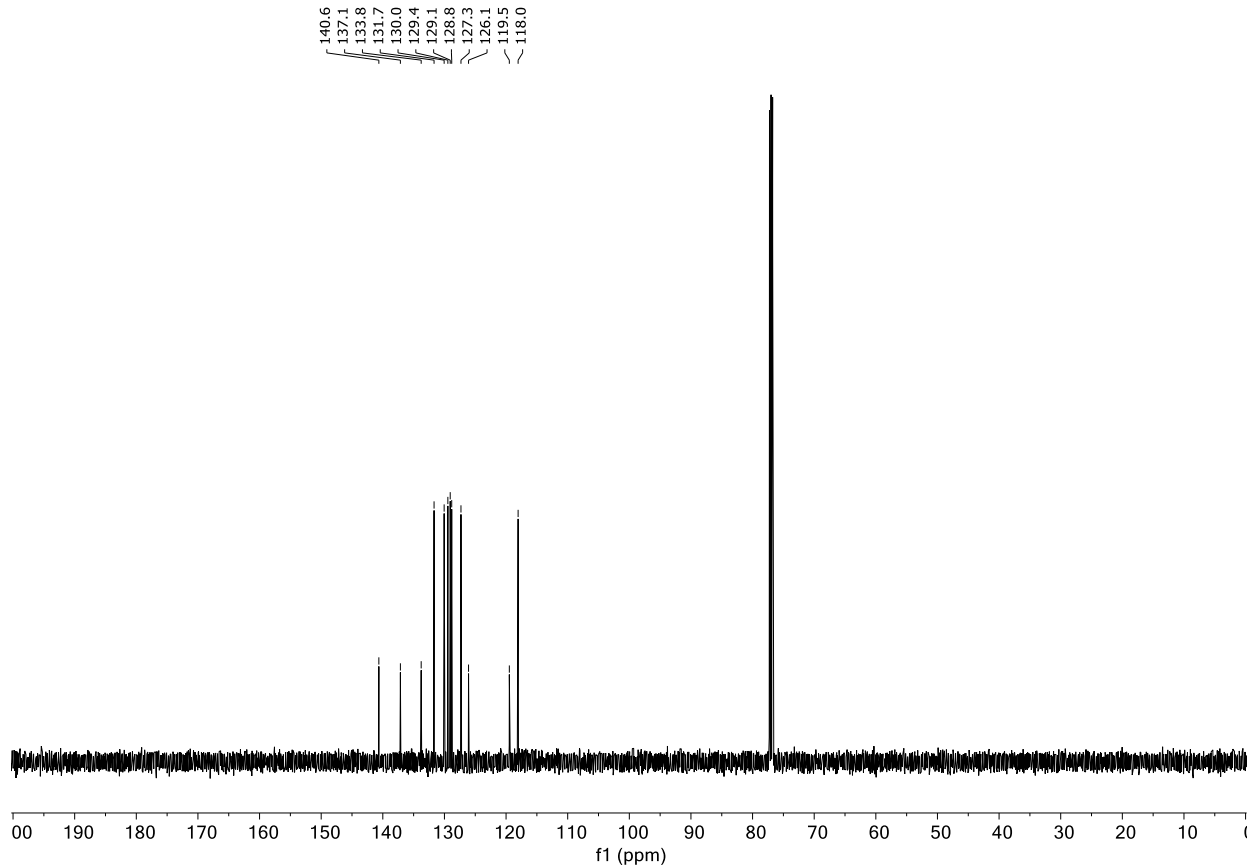

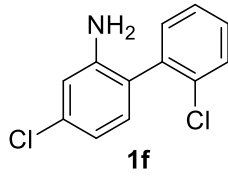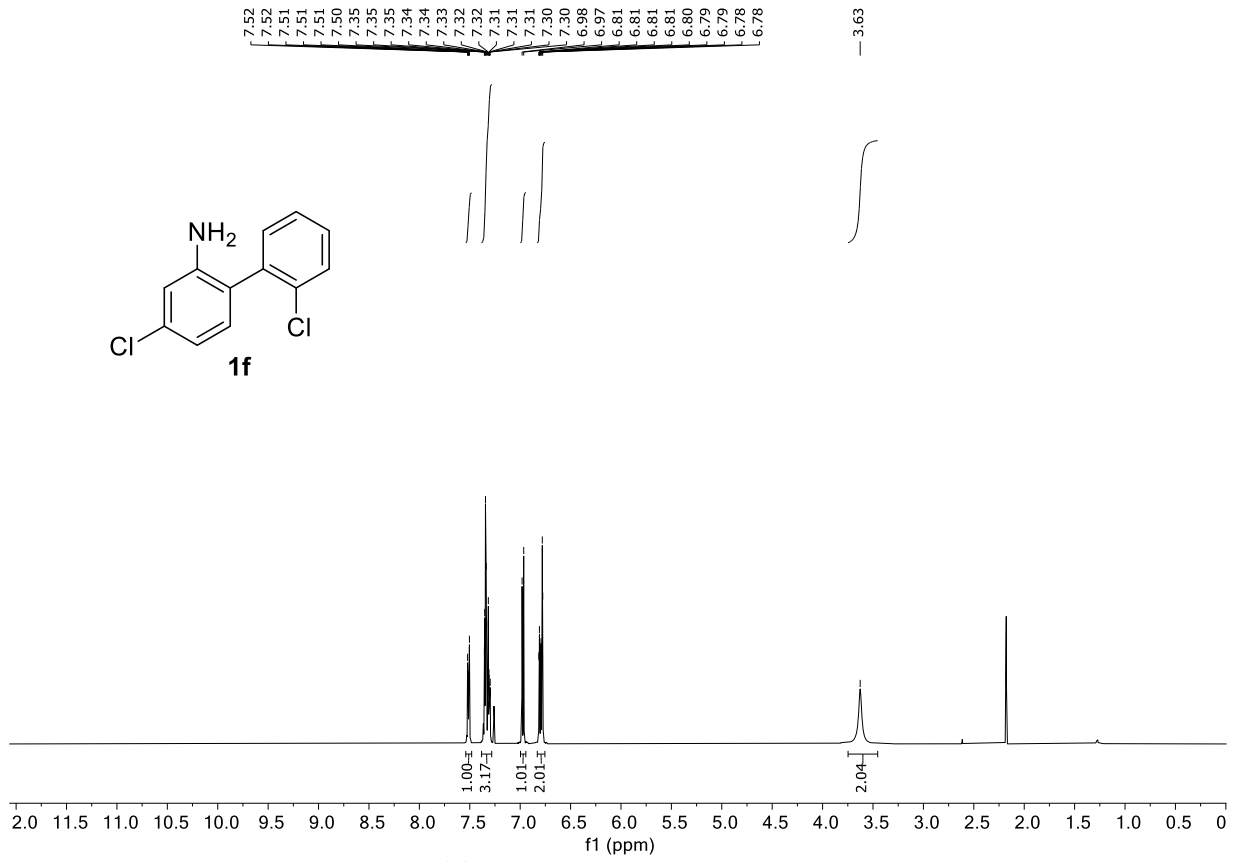

145.0  
 136.9  
 134.6  
 133.9  
 131.9  
 131.6  
 130.1  
 129.4  
 127.4  
 123.6  
 118.3  
 115.2

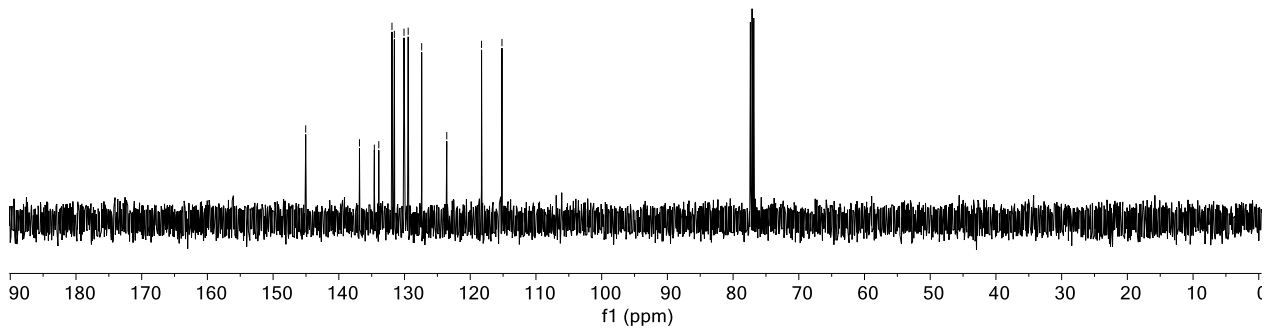

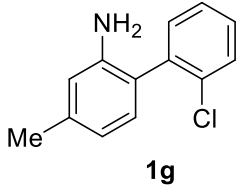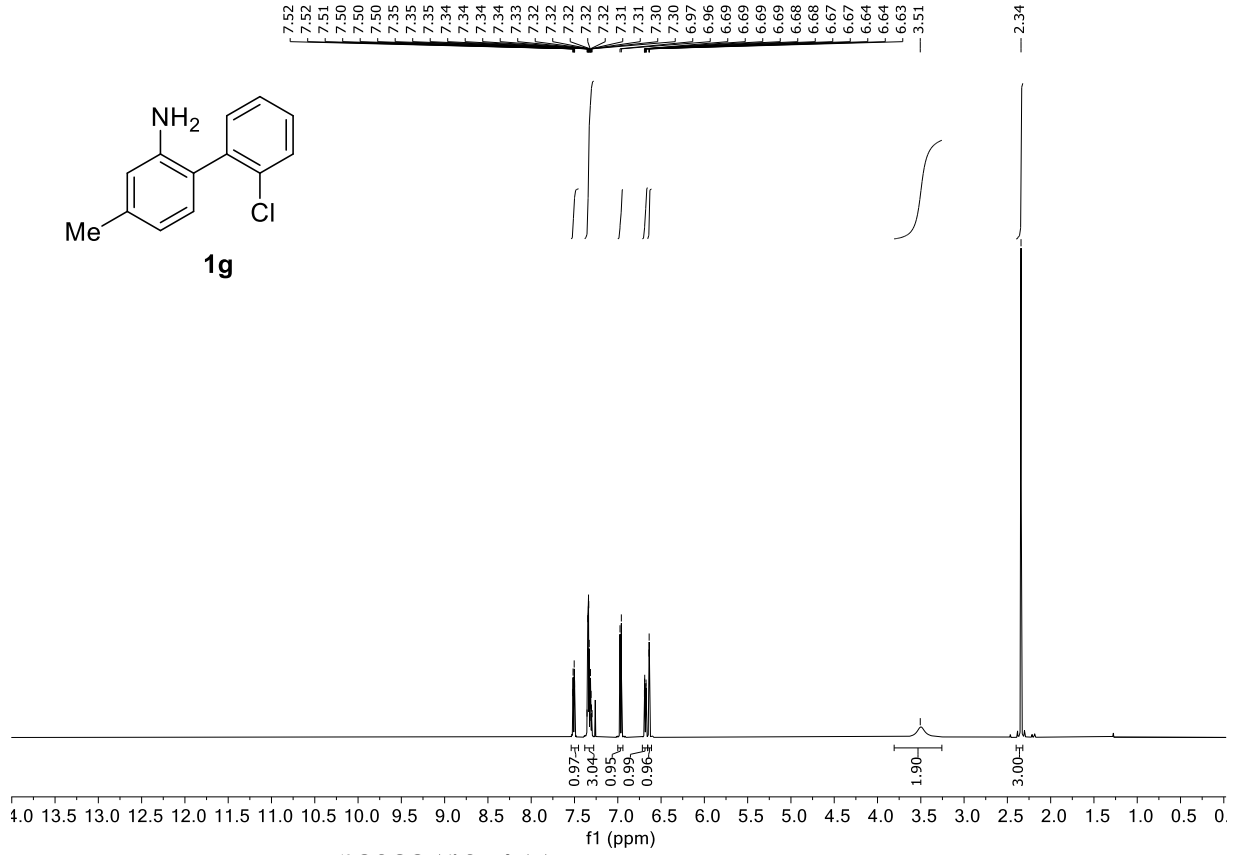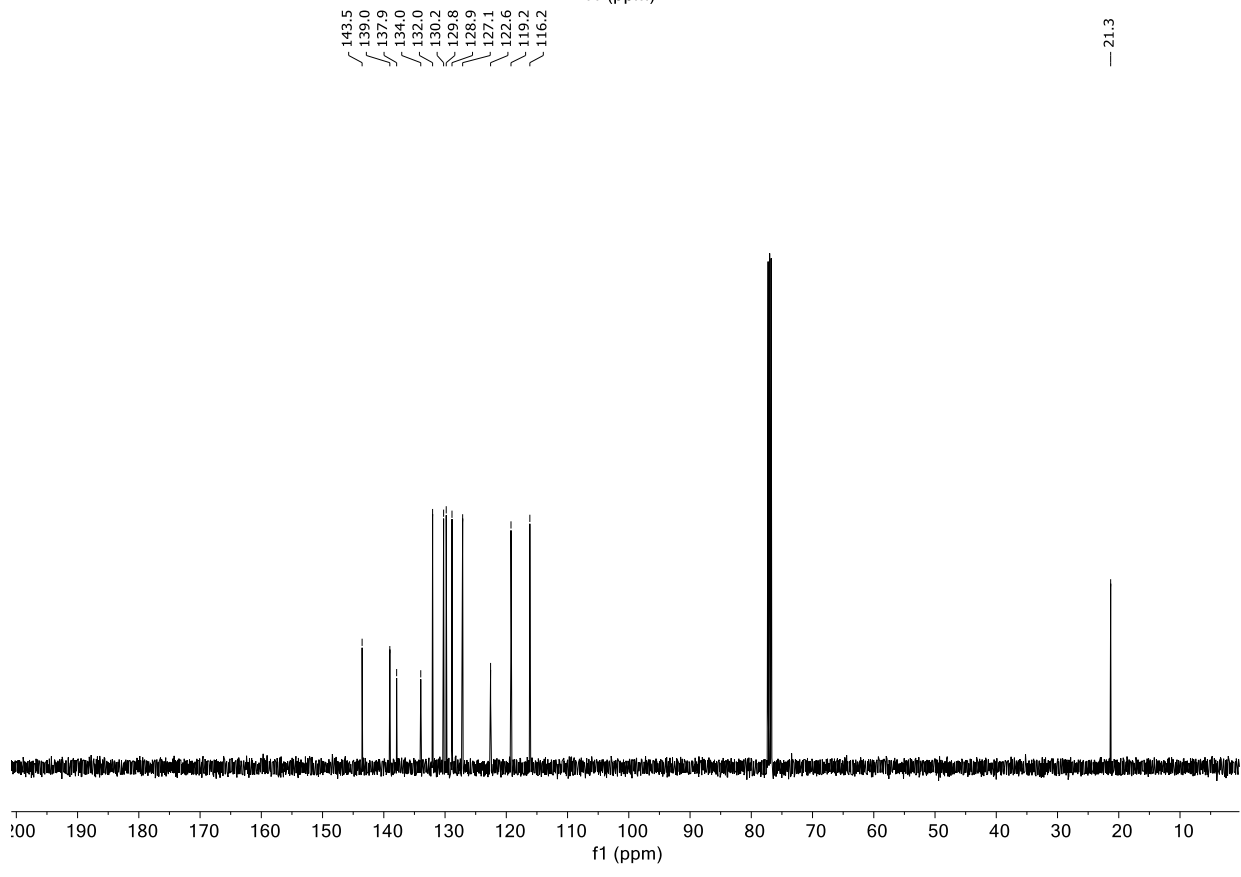

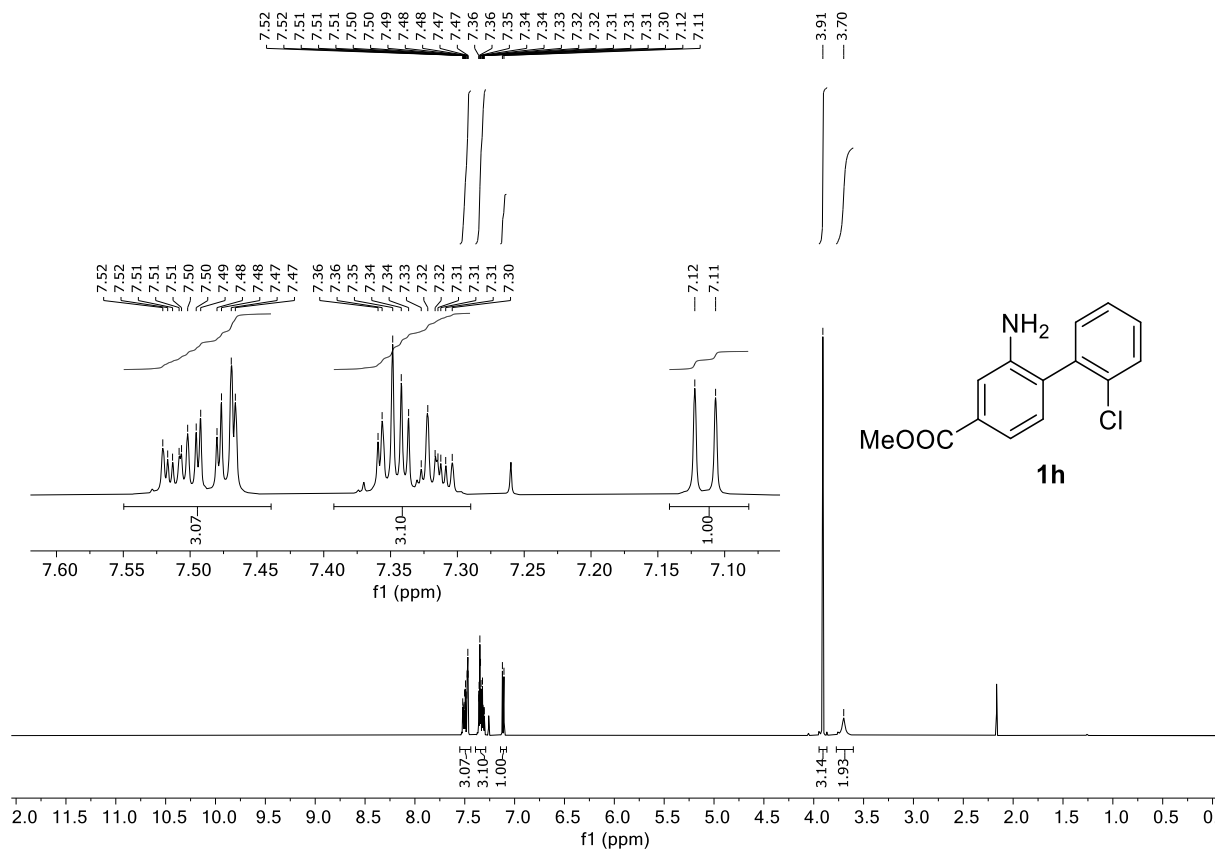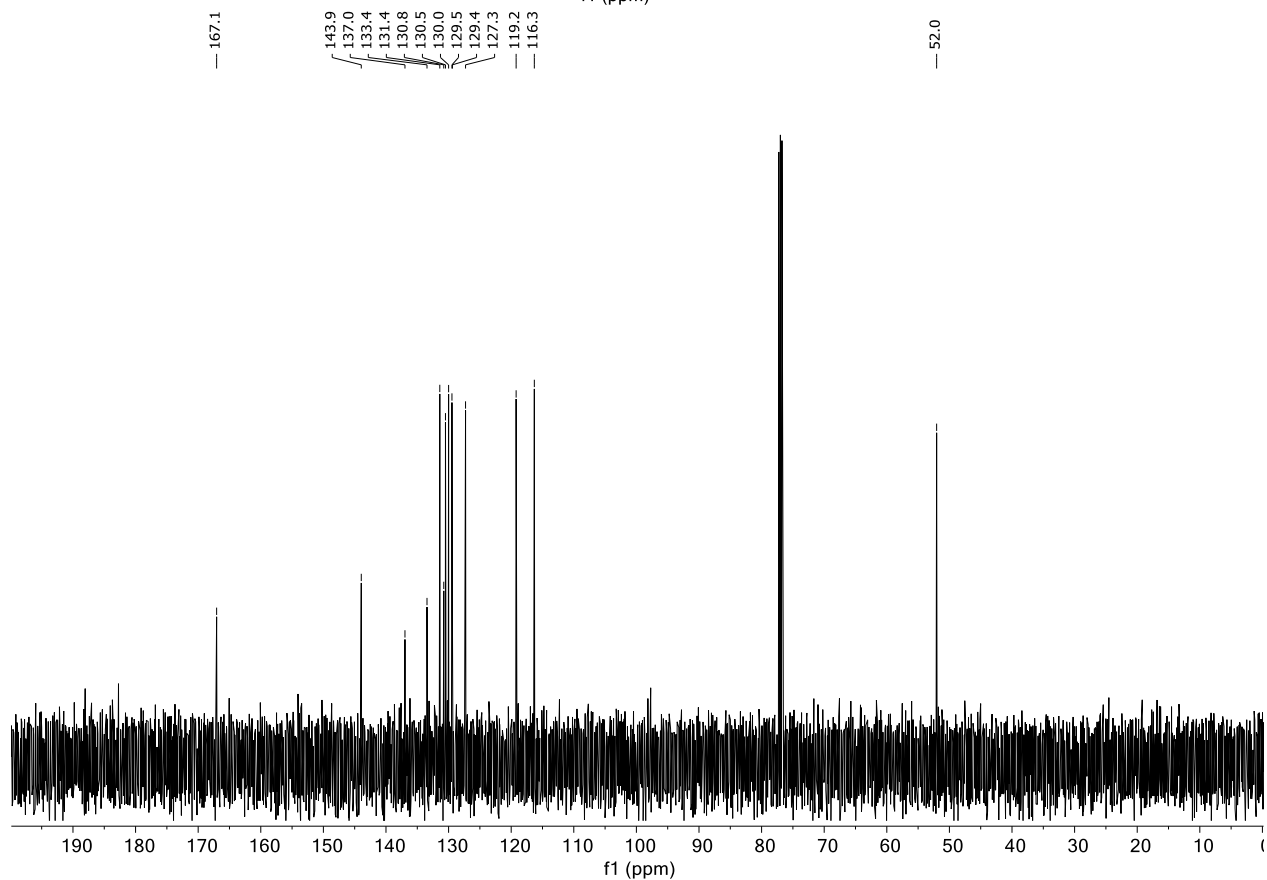

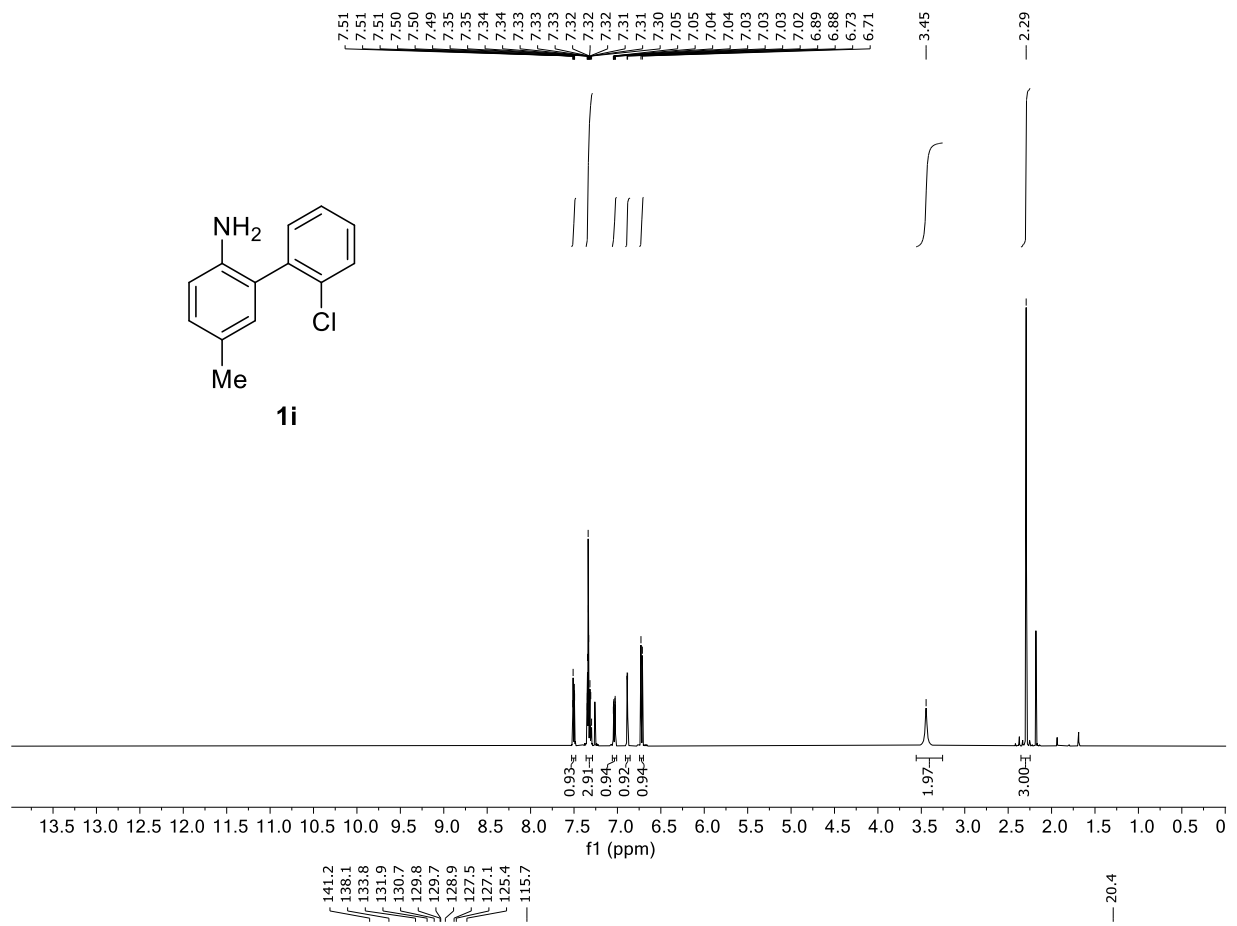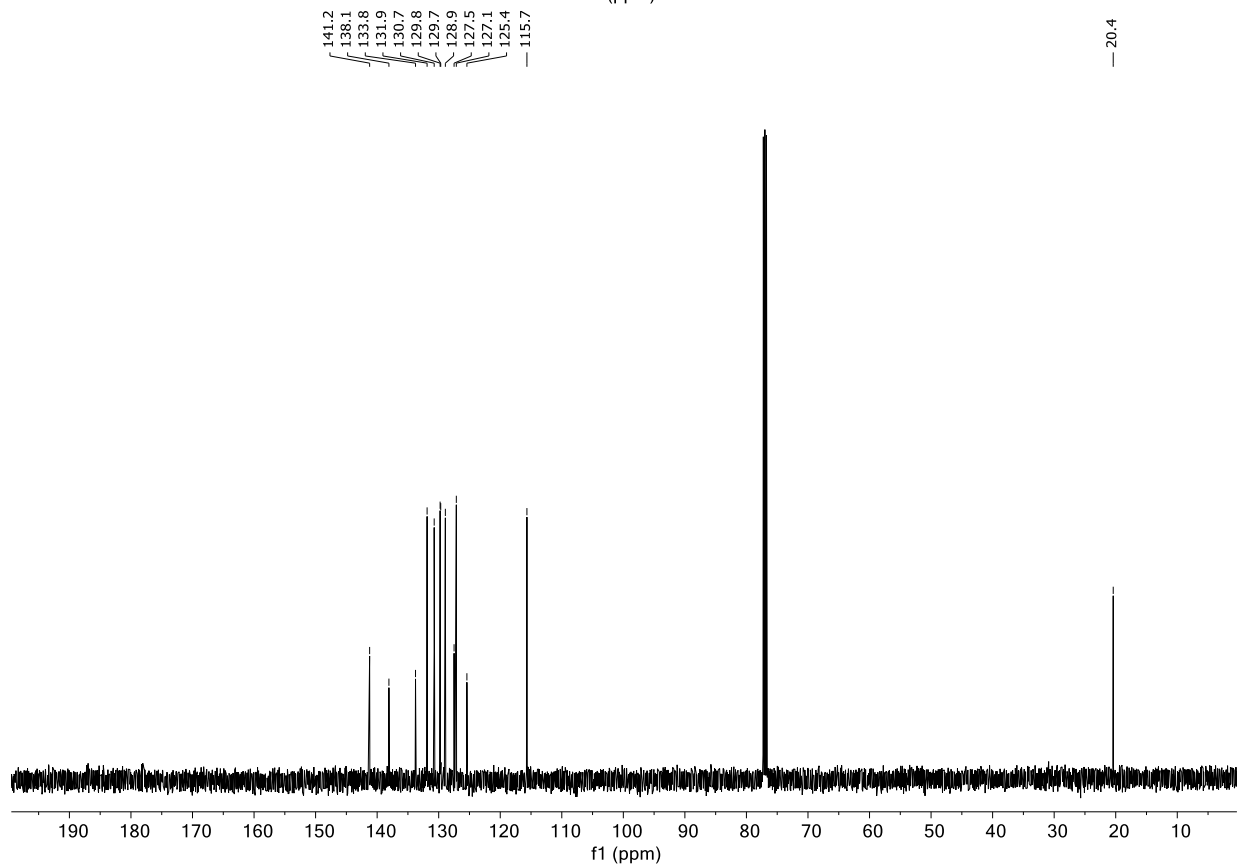



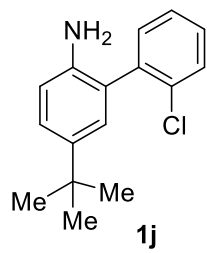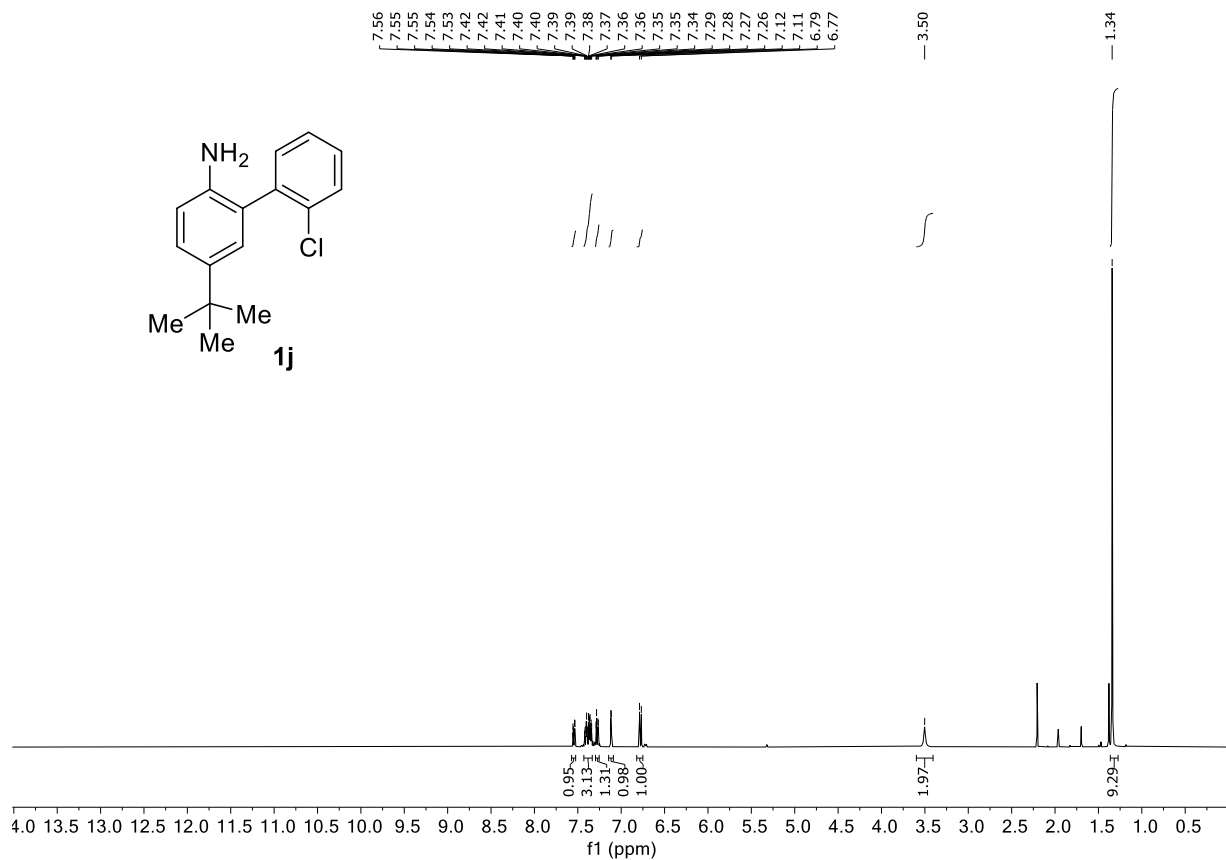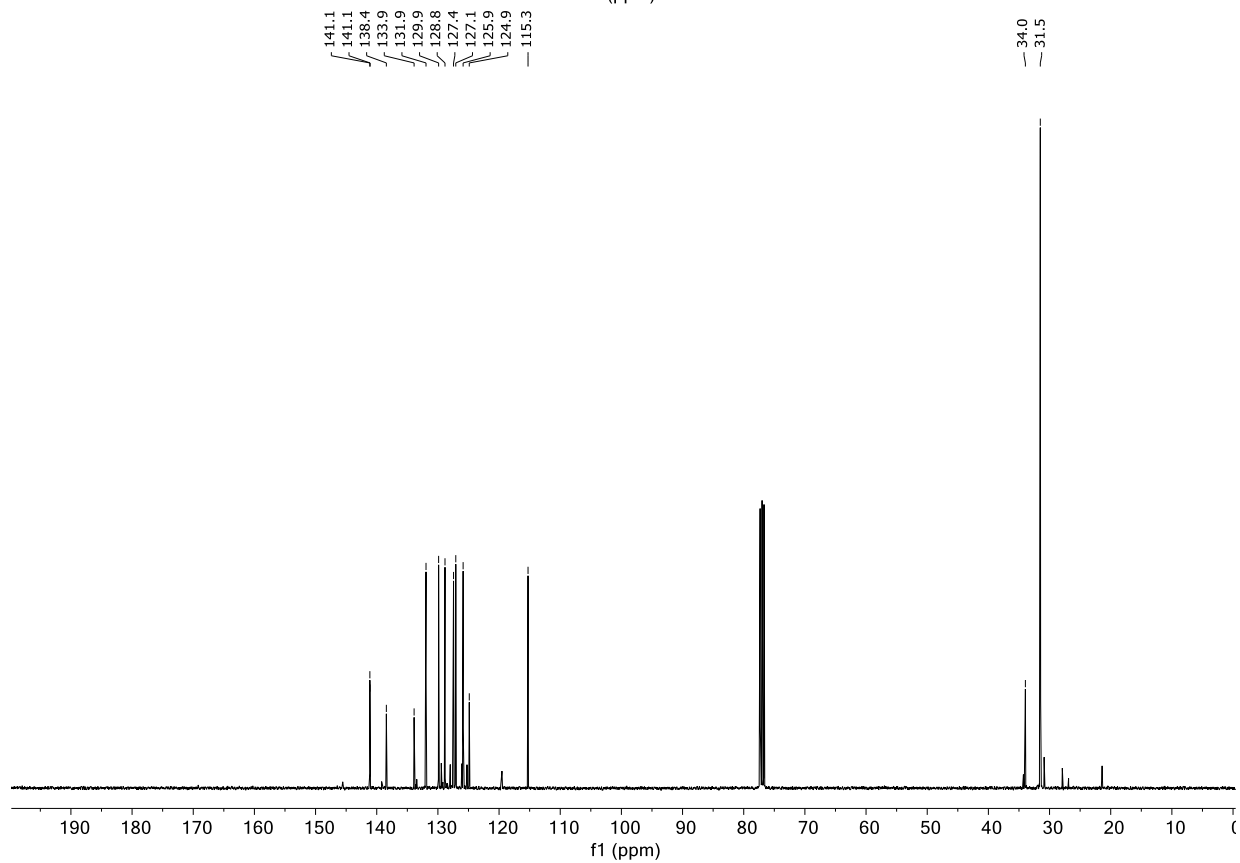

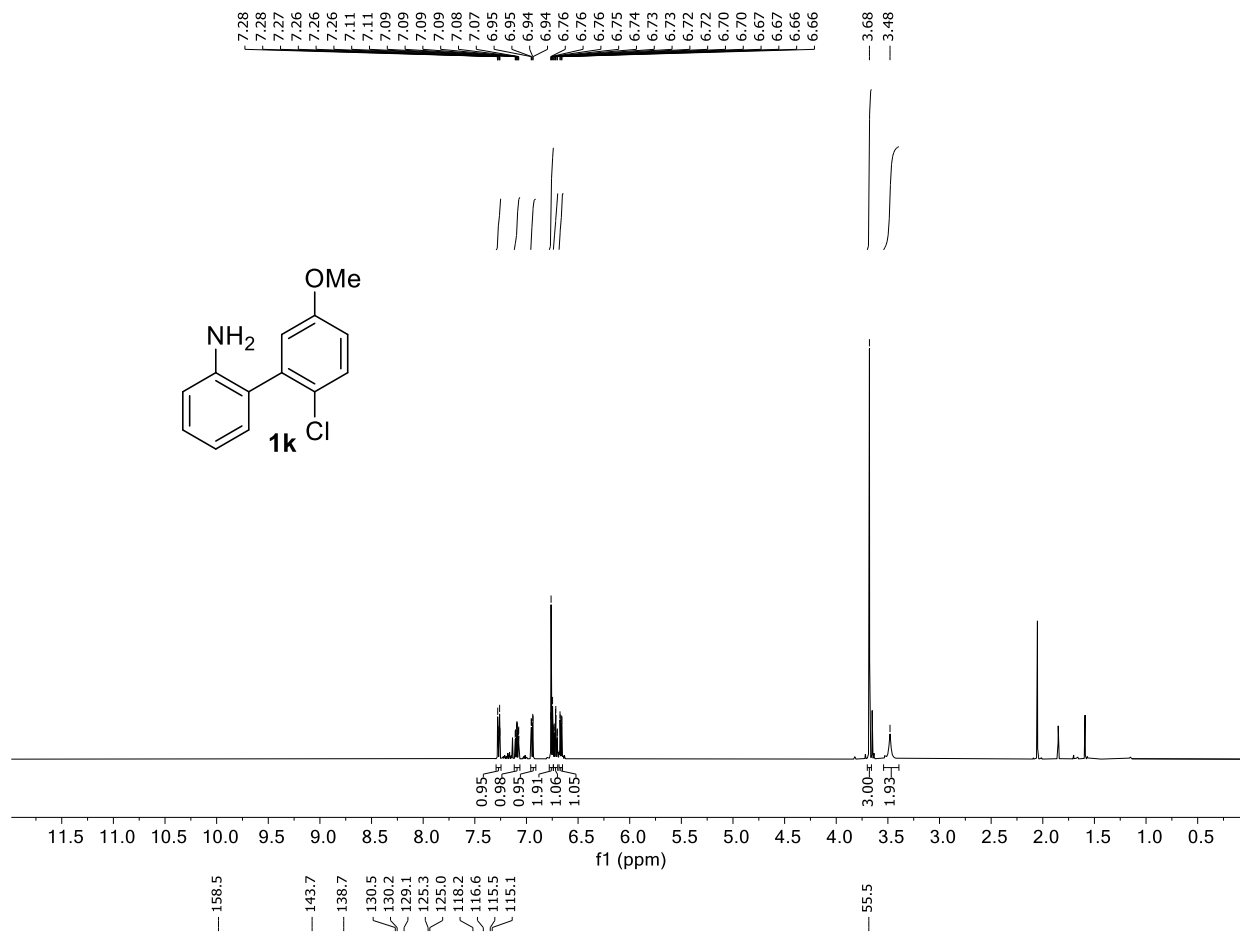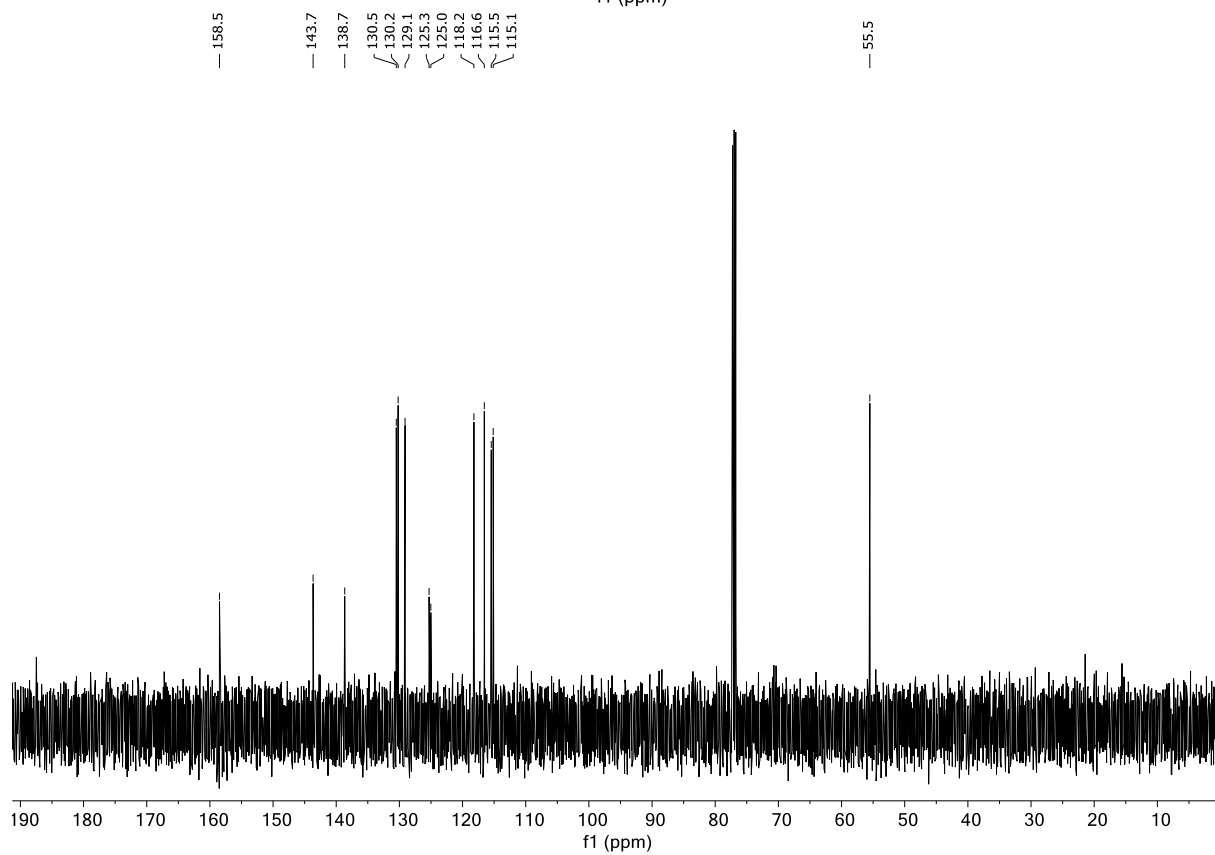

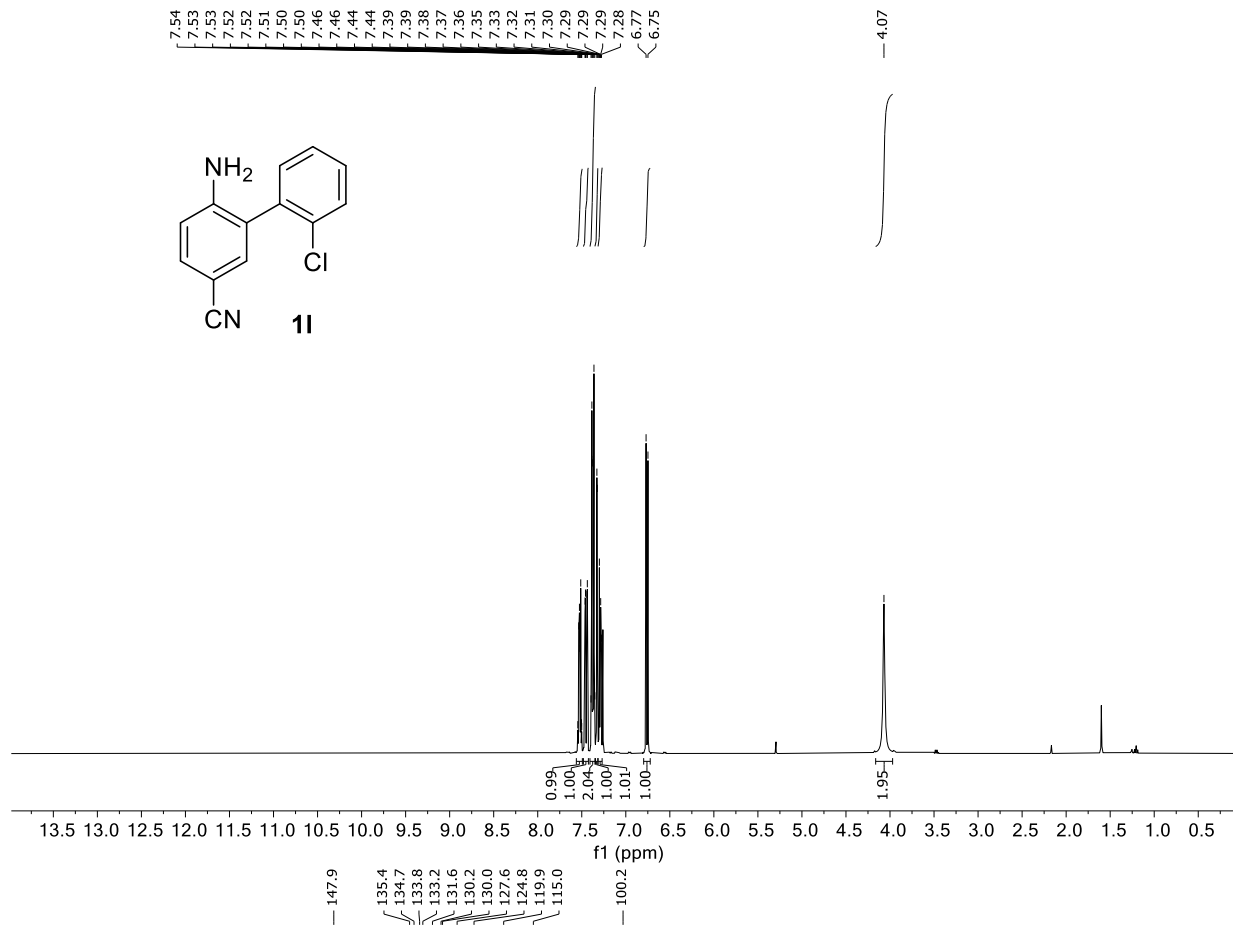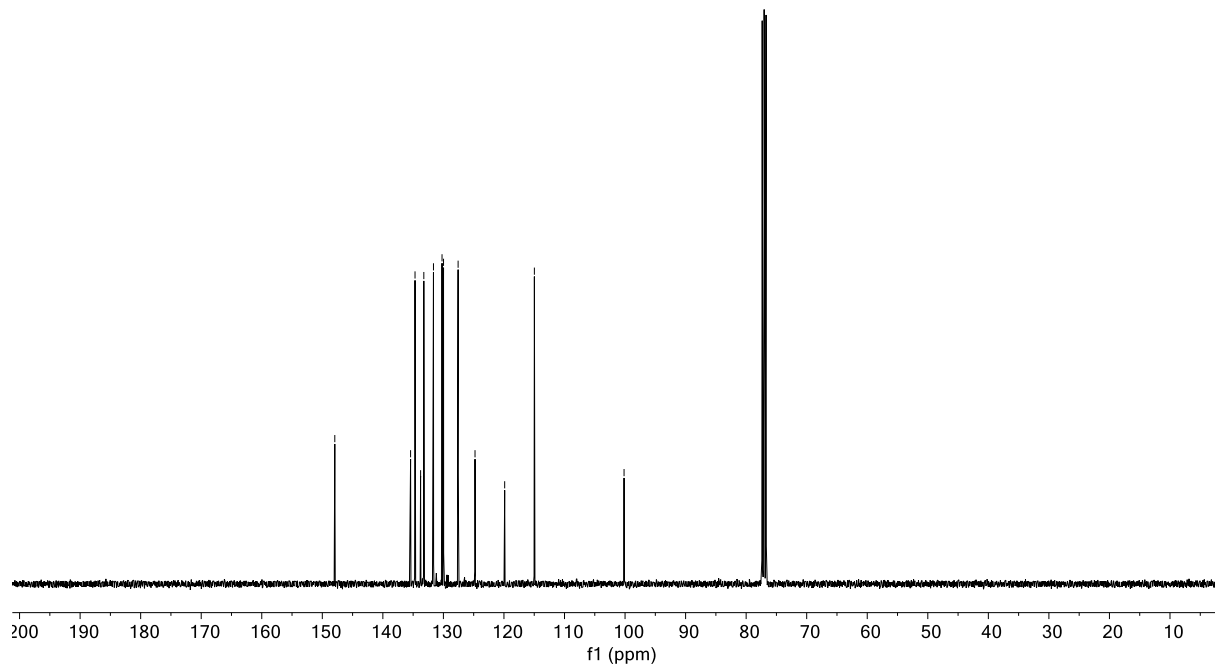

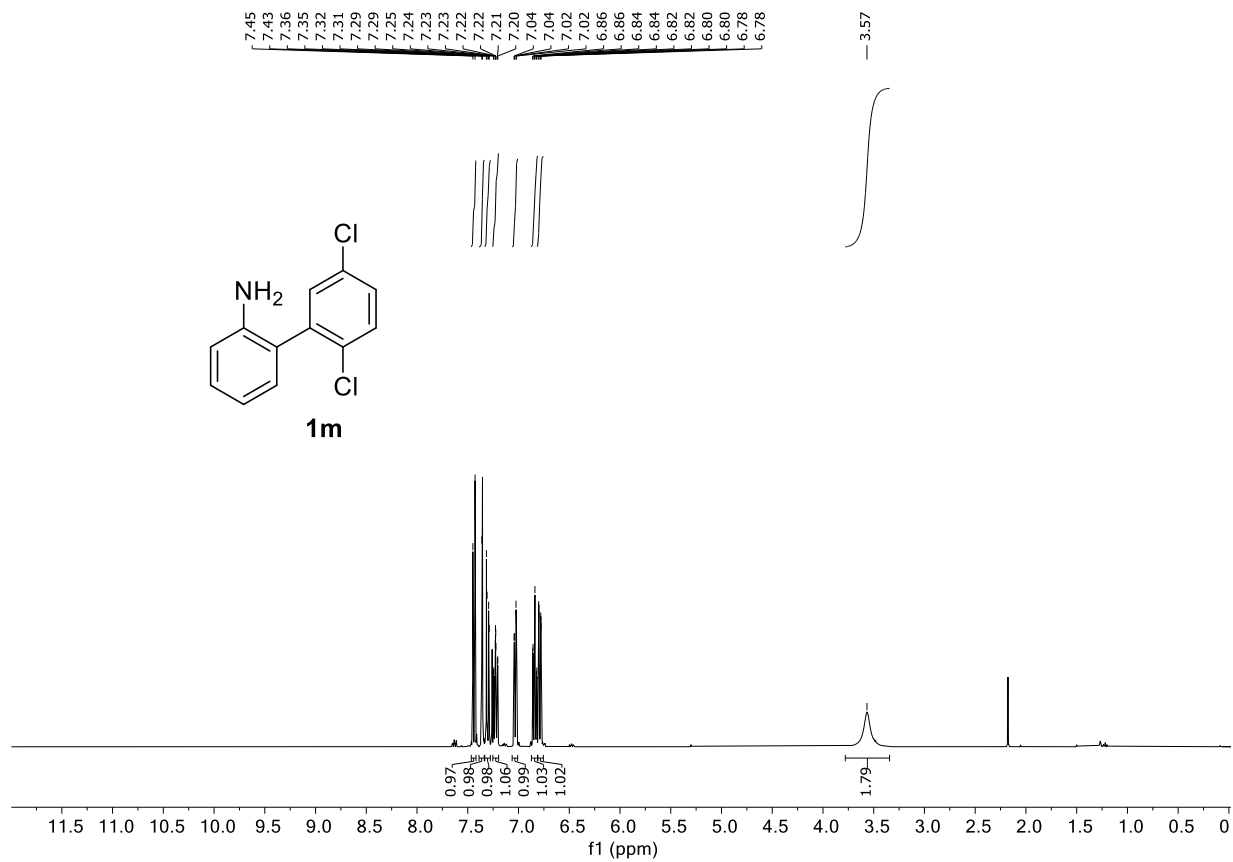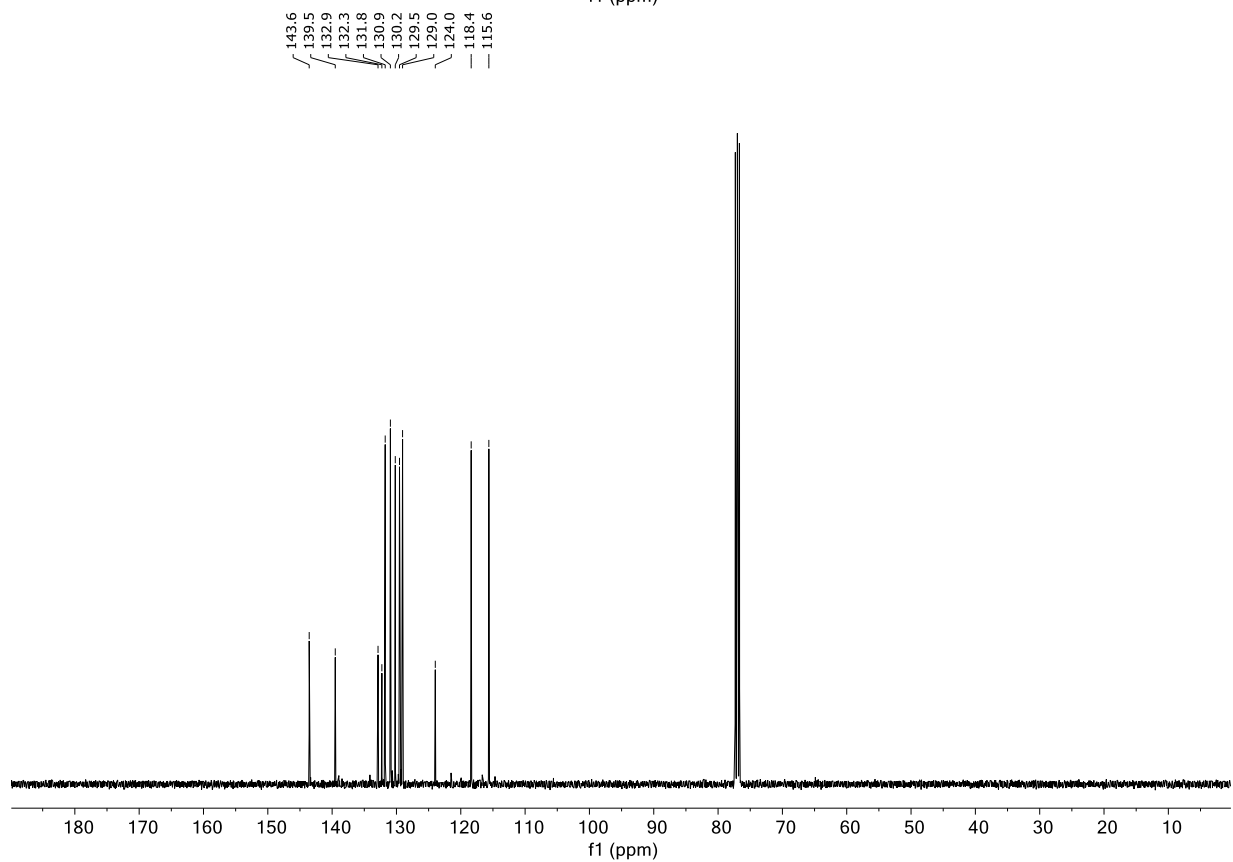

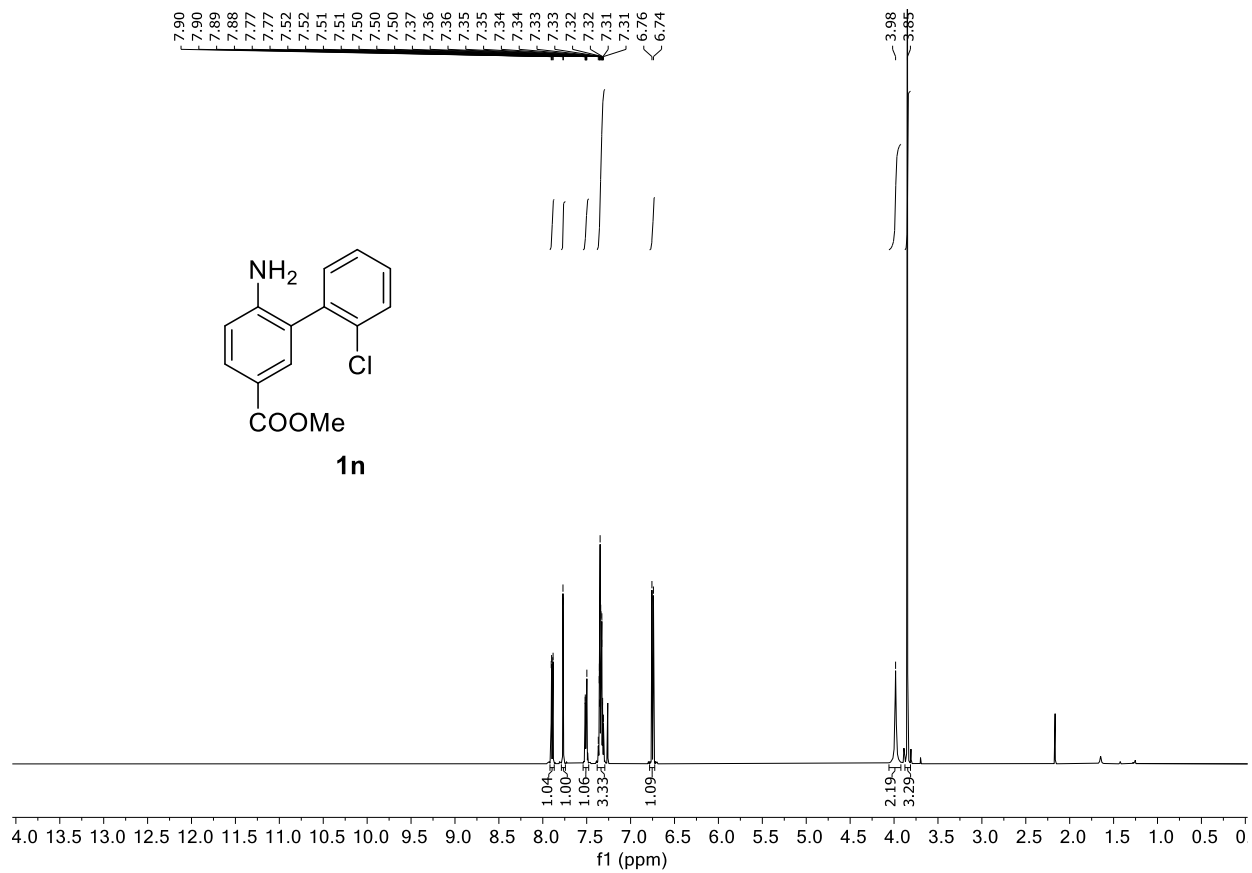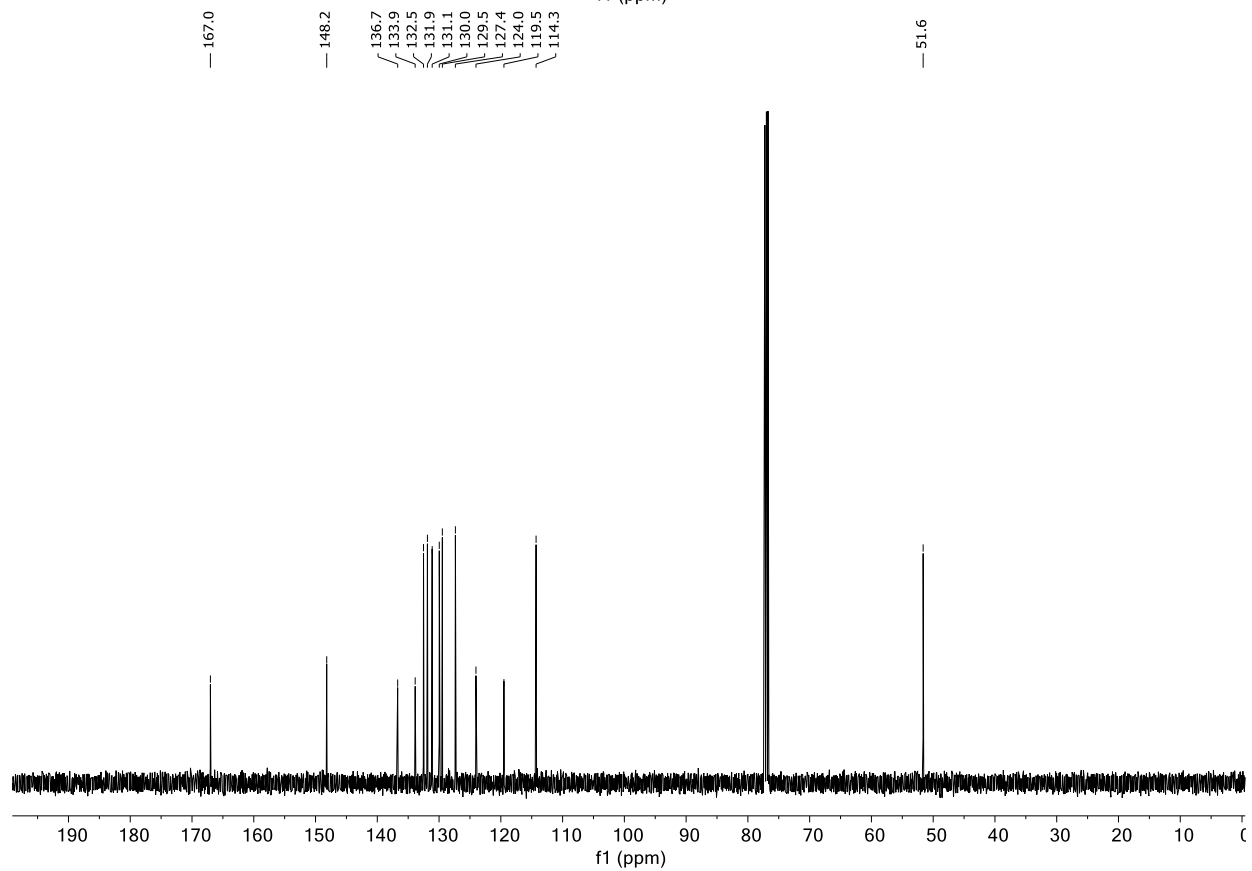

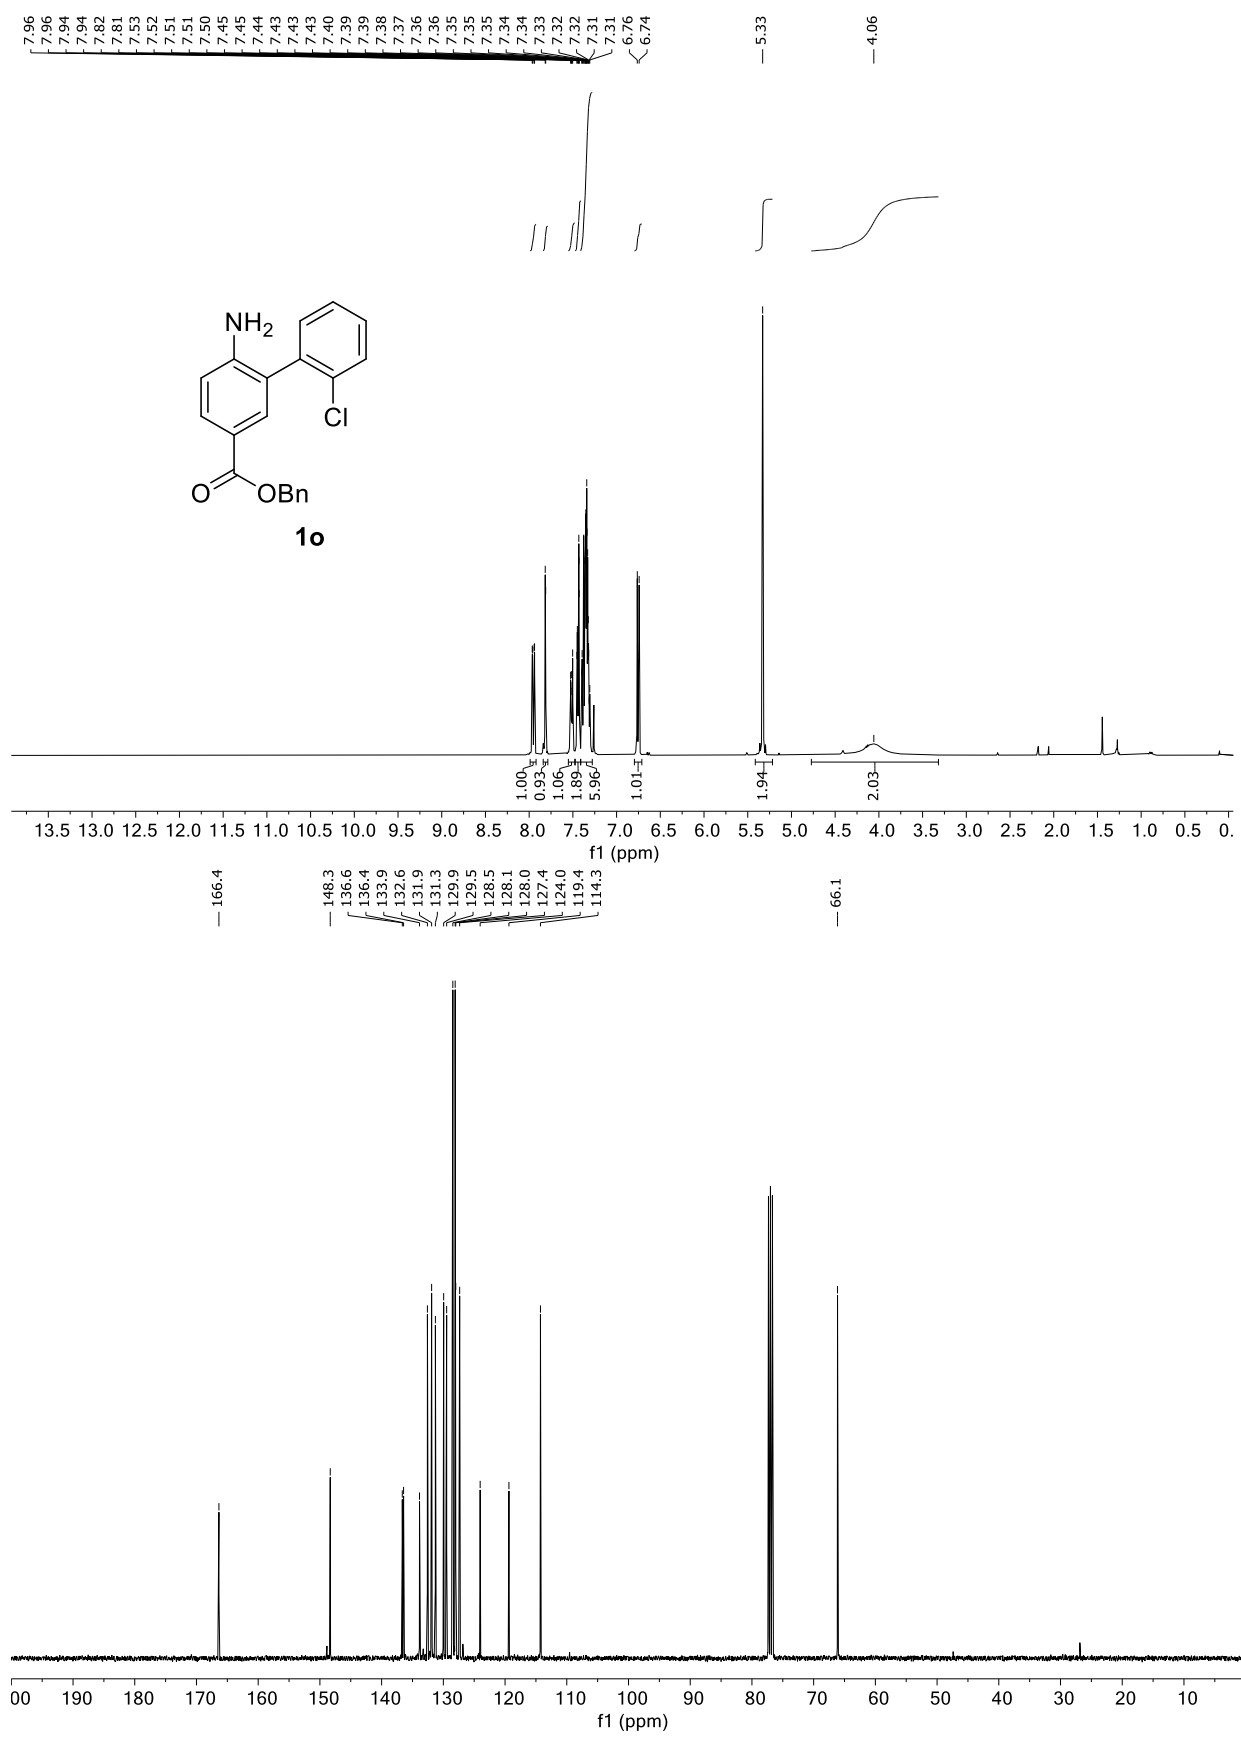

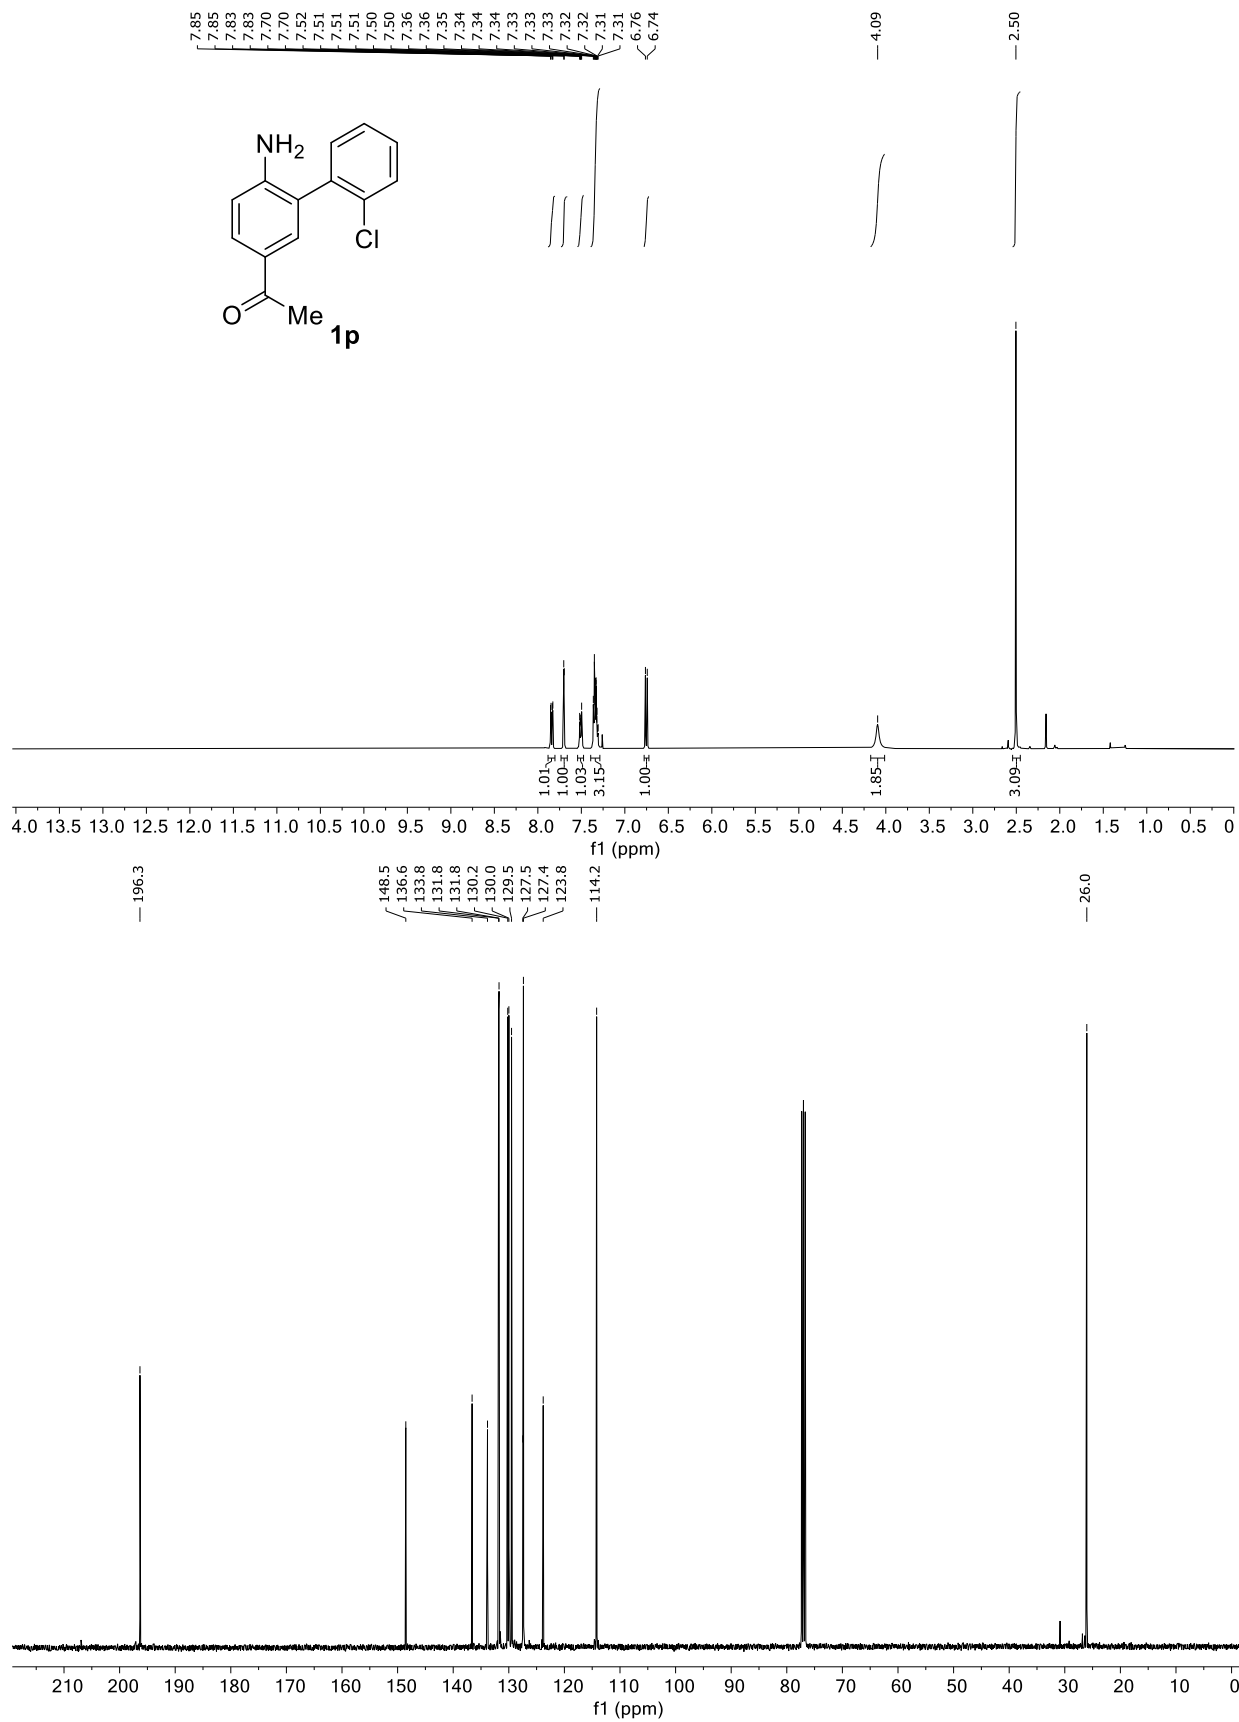

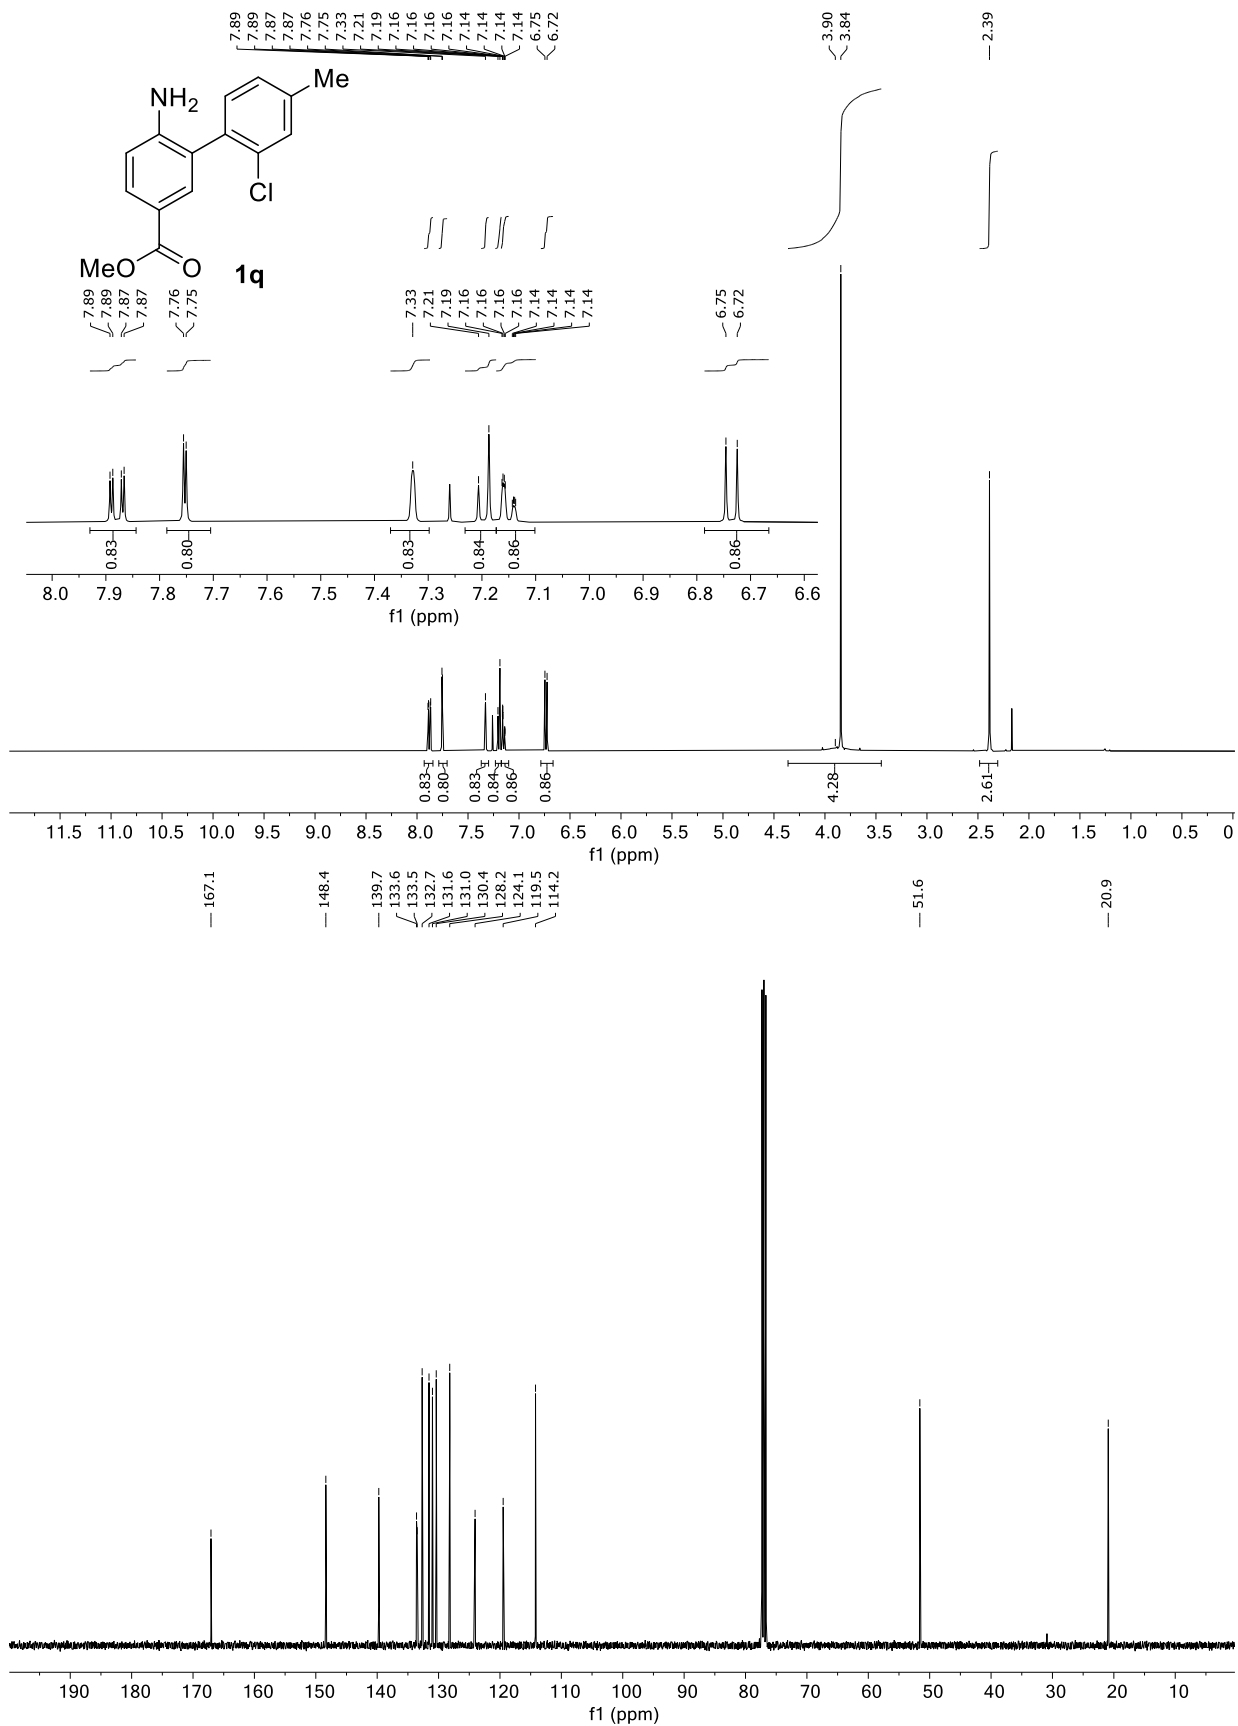



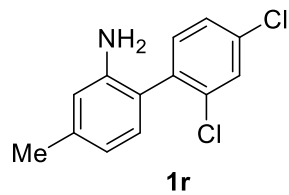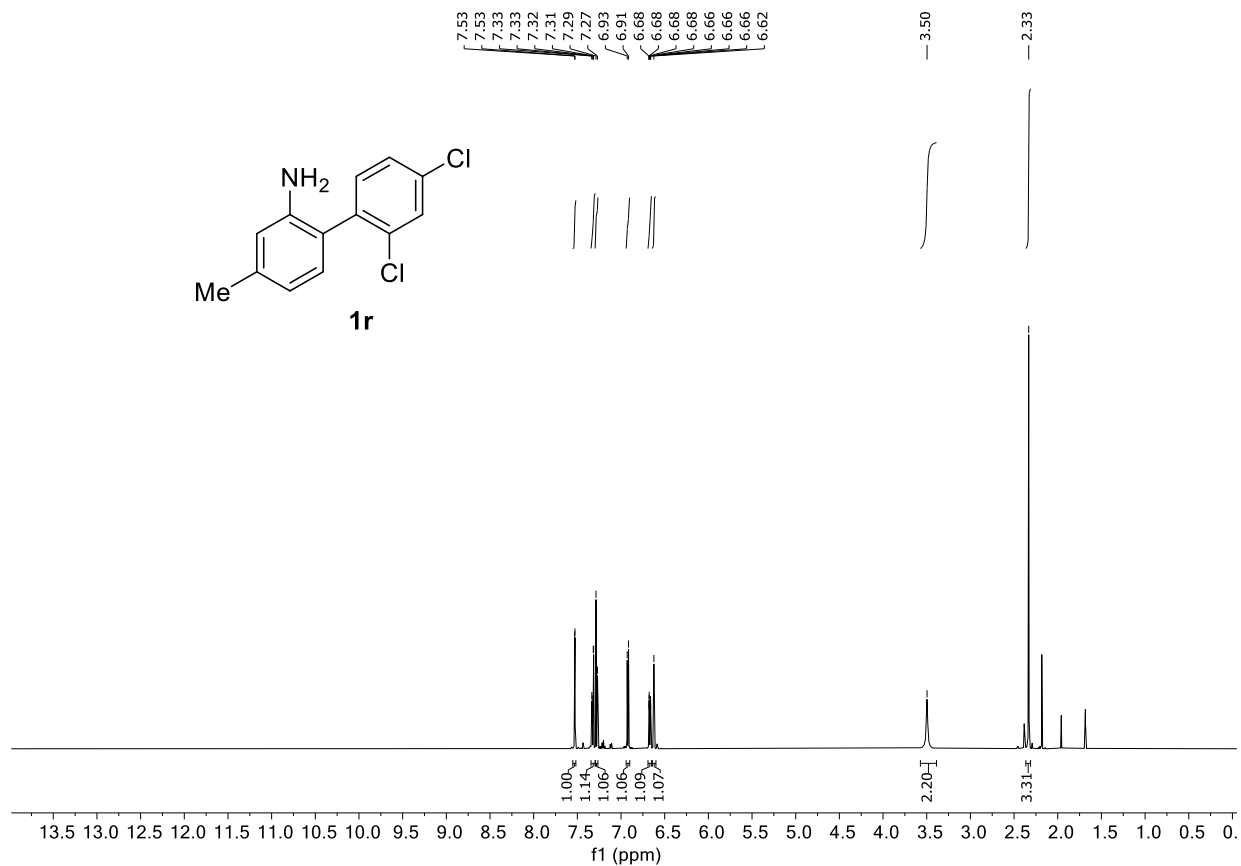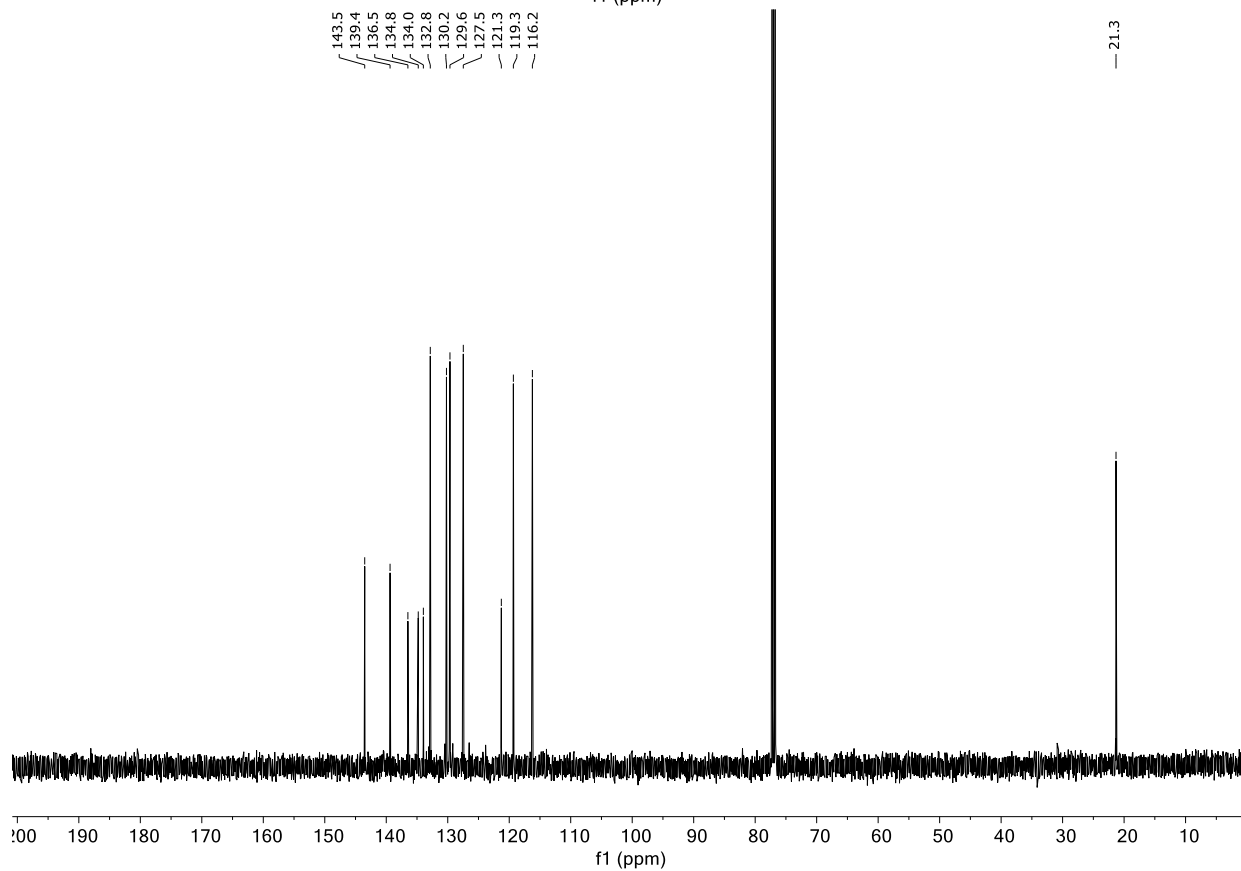

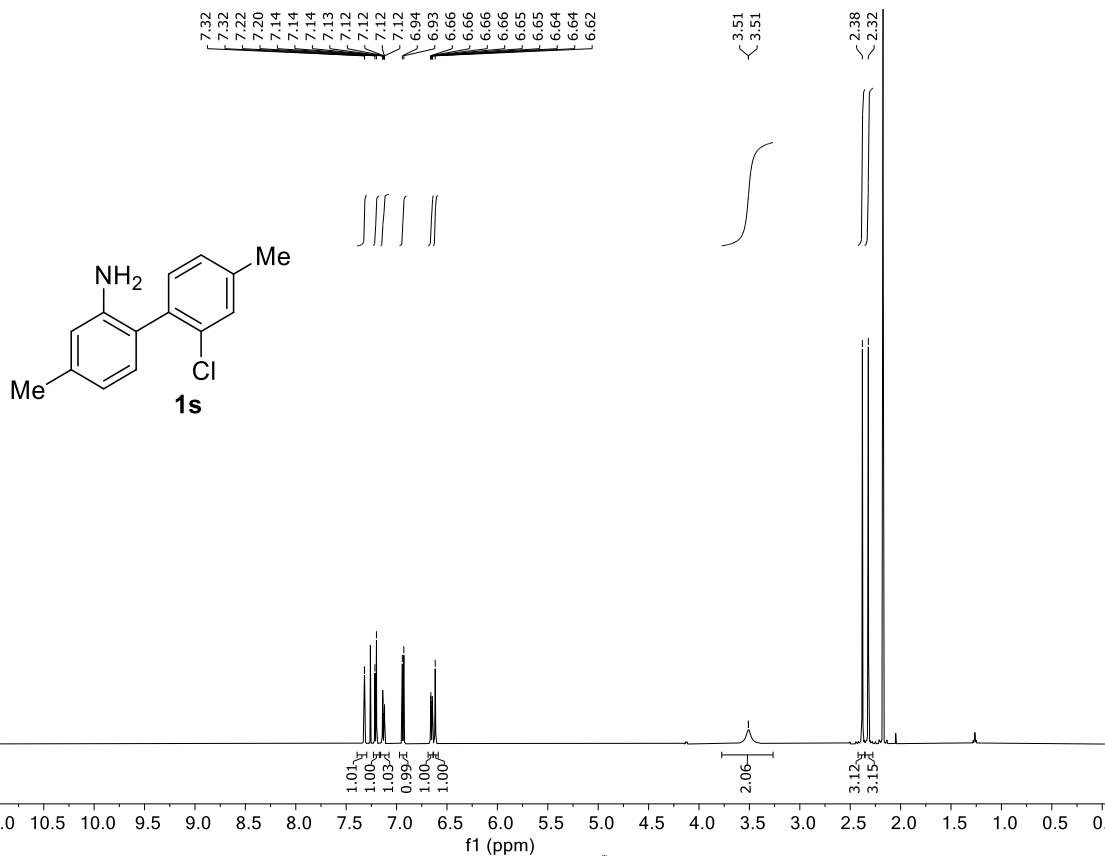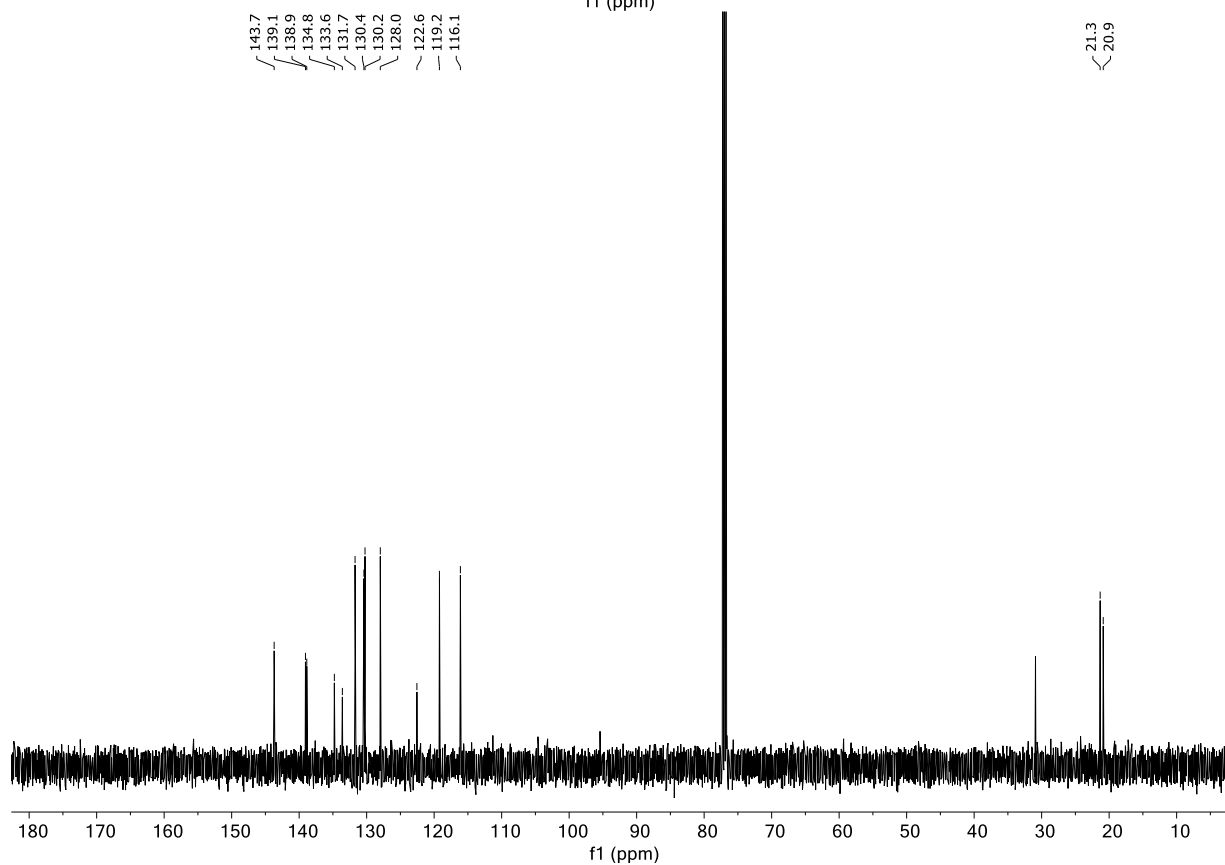

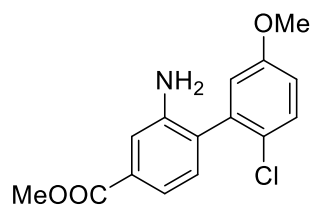

**1t**

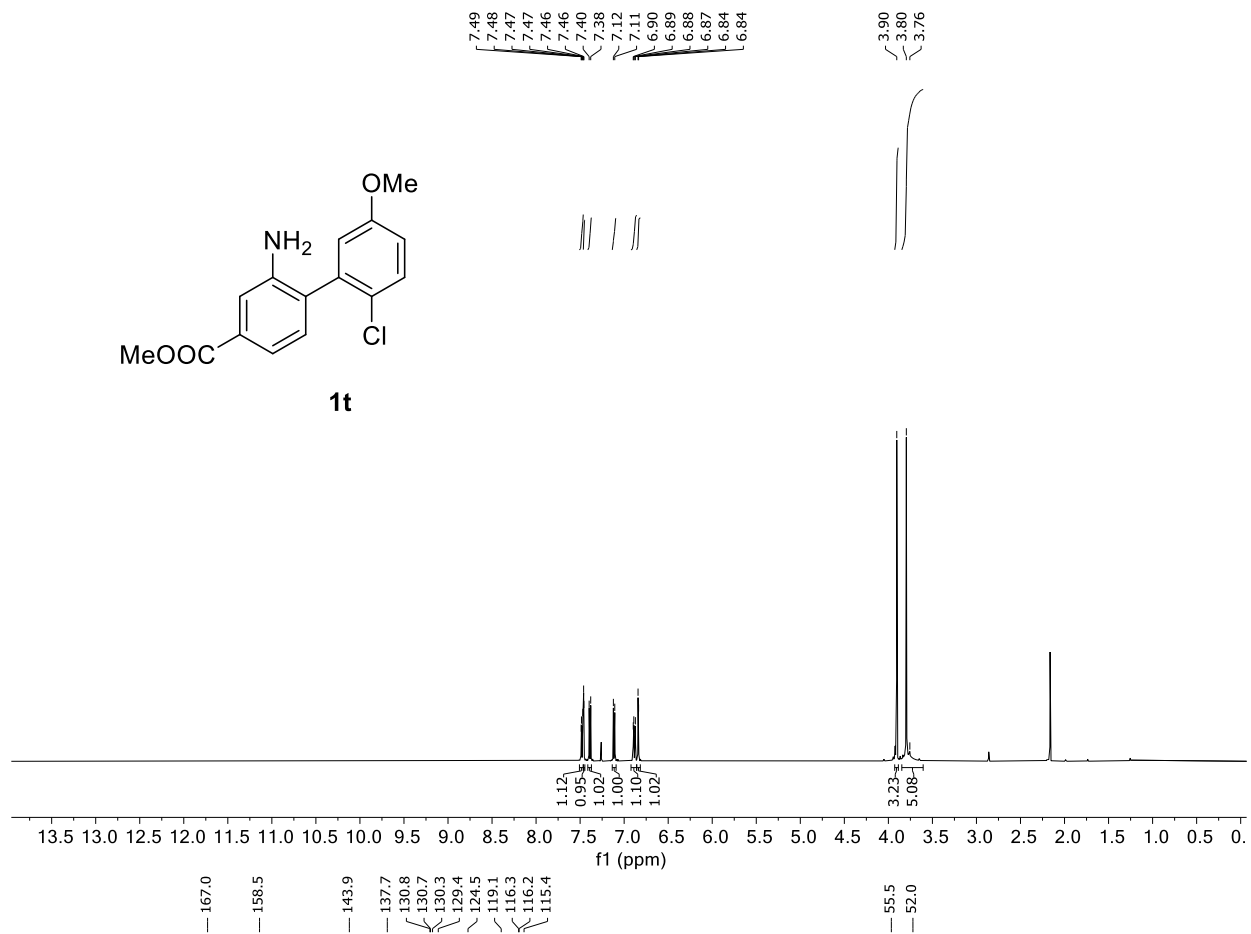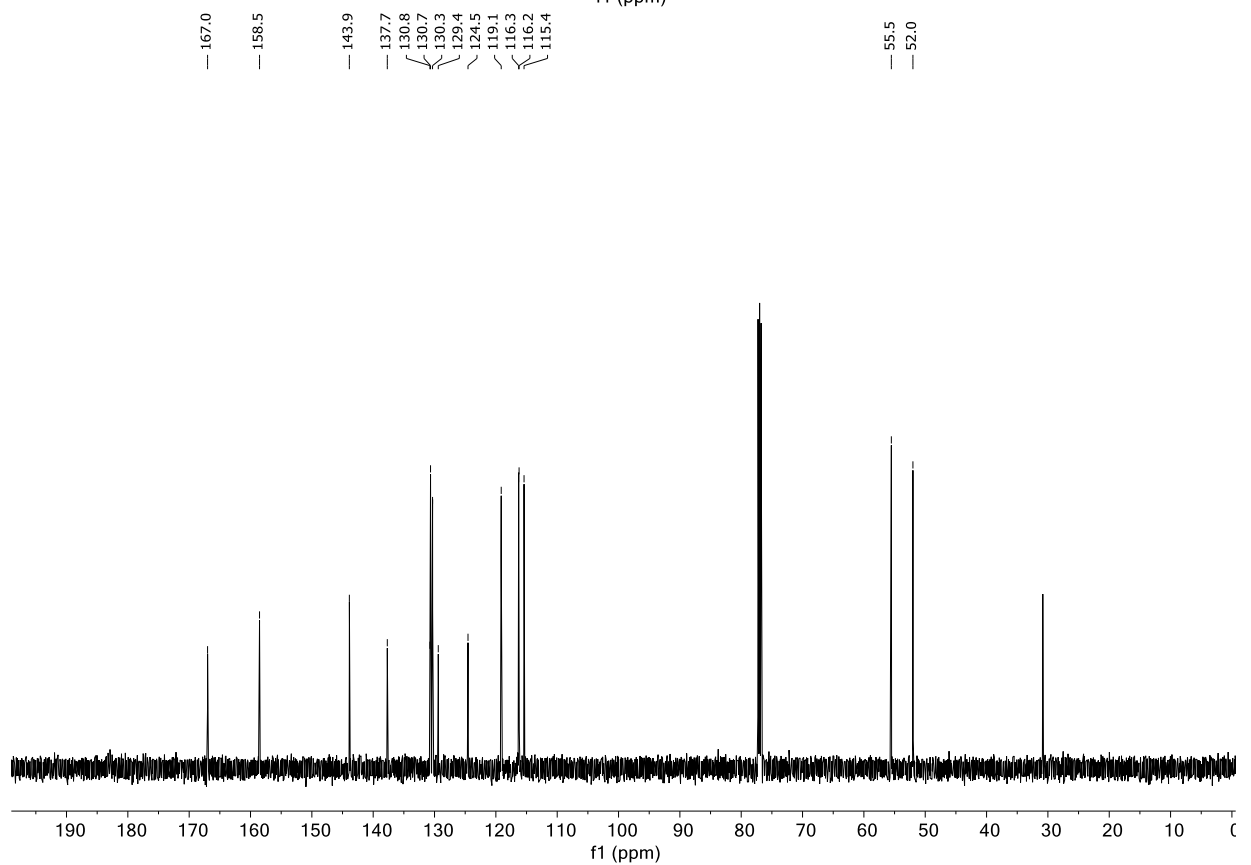

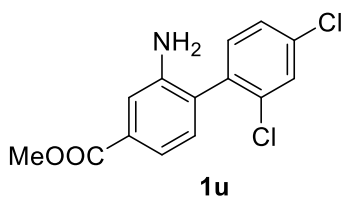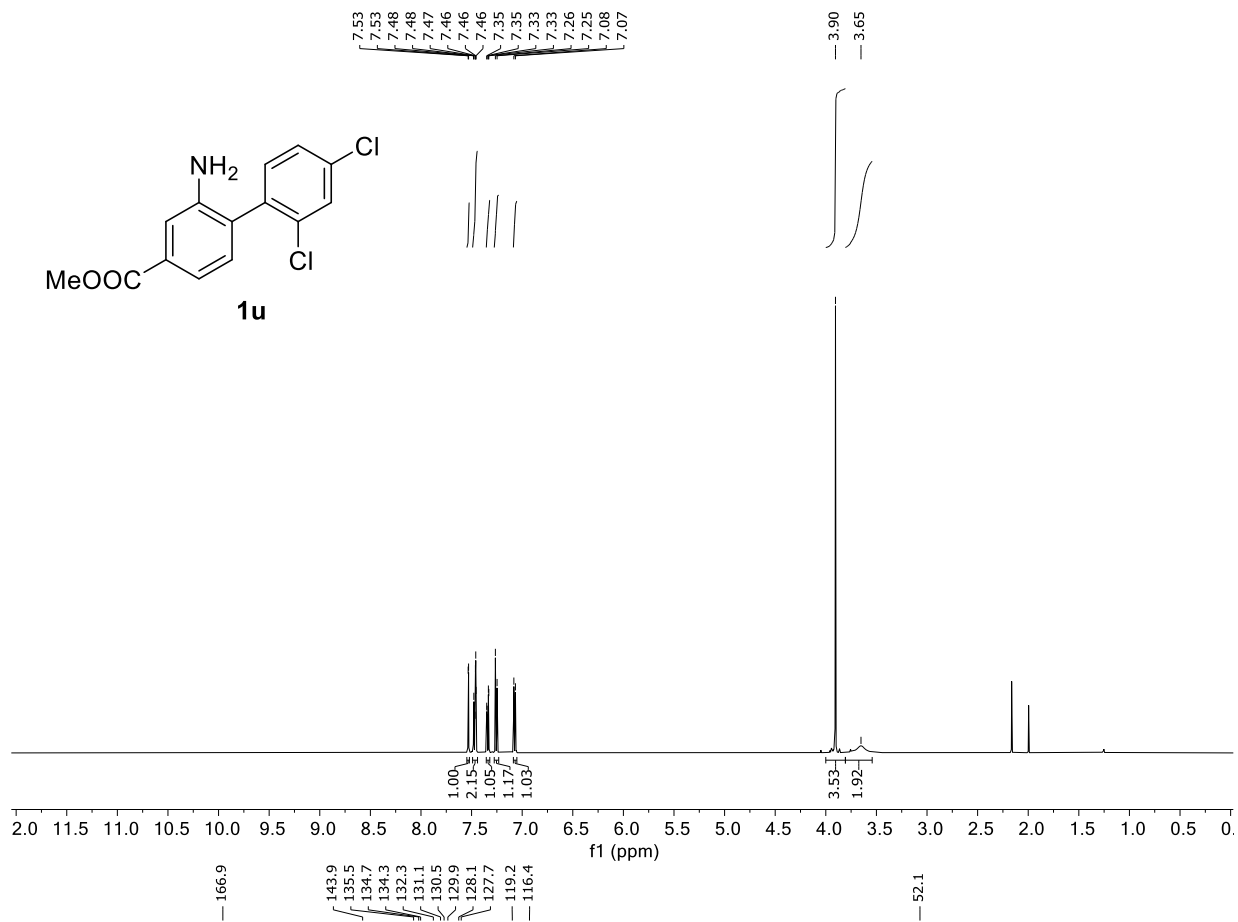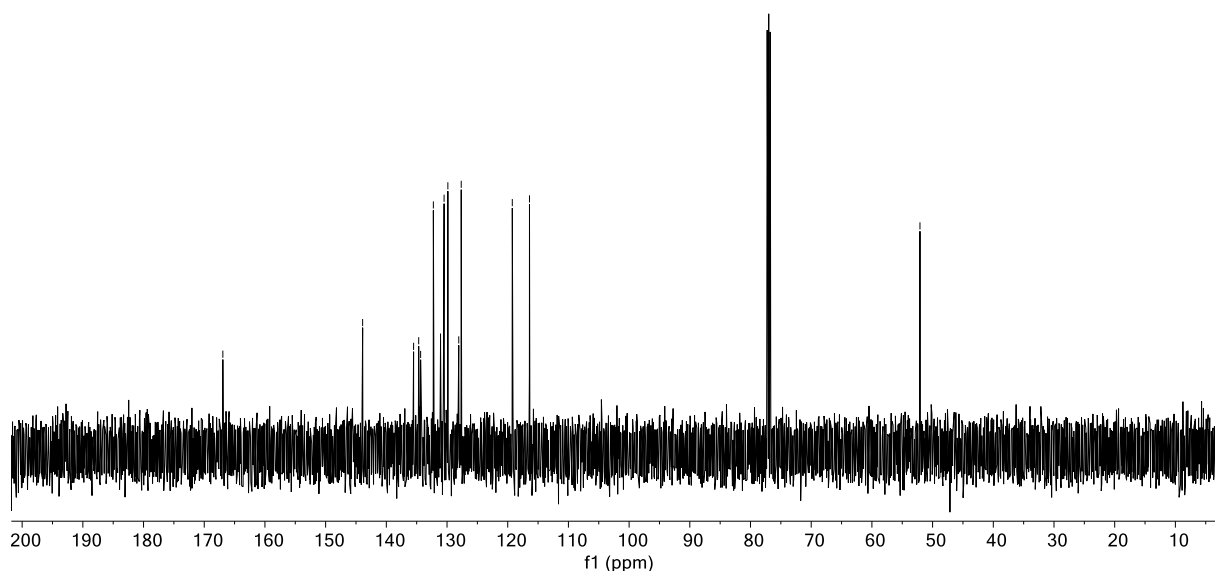

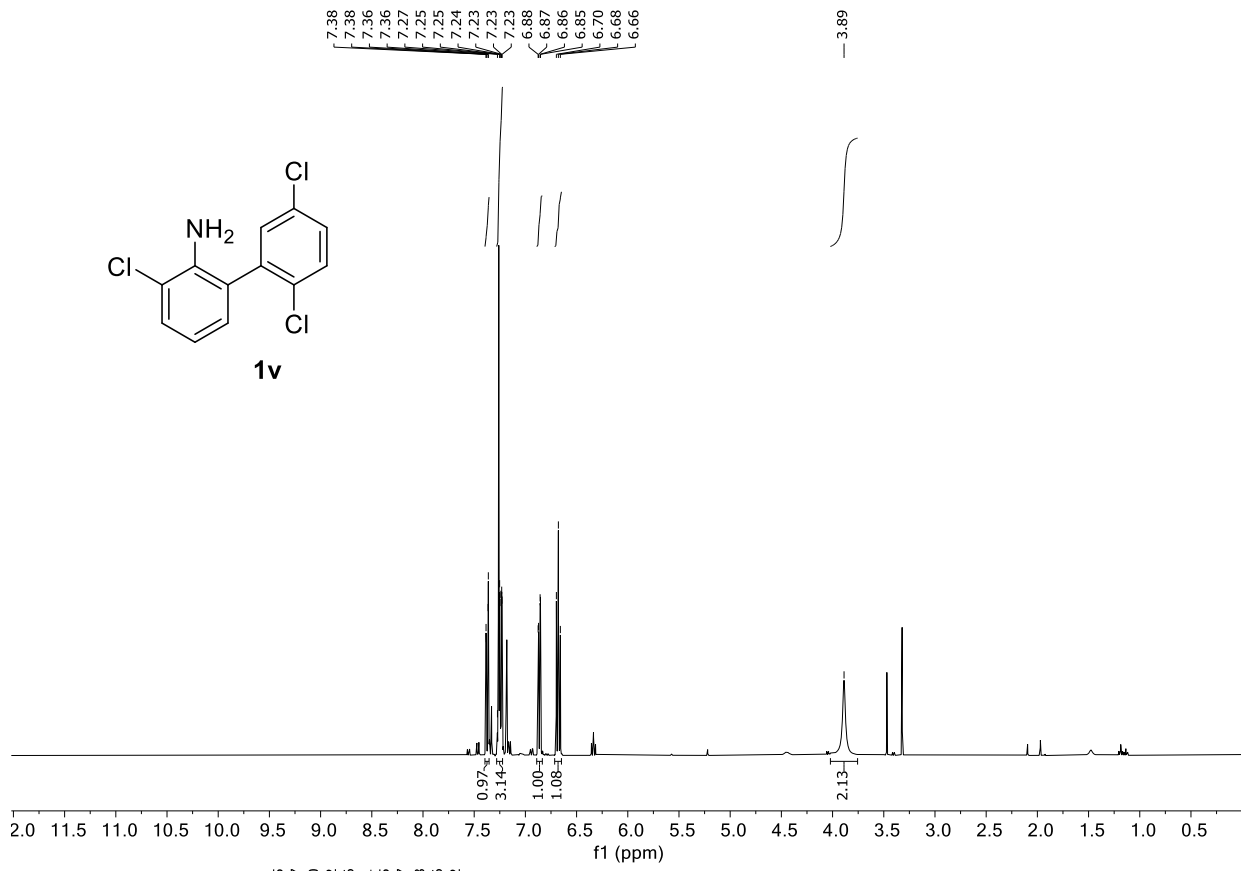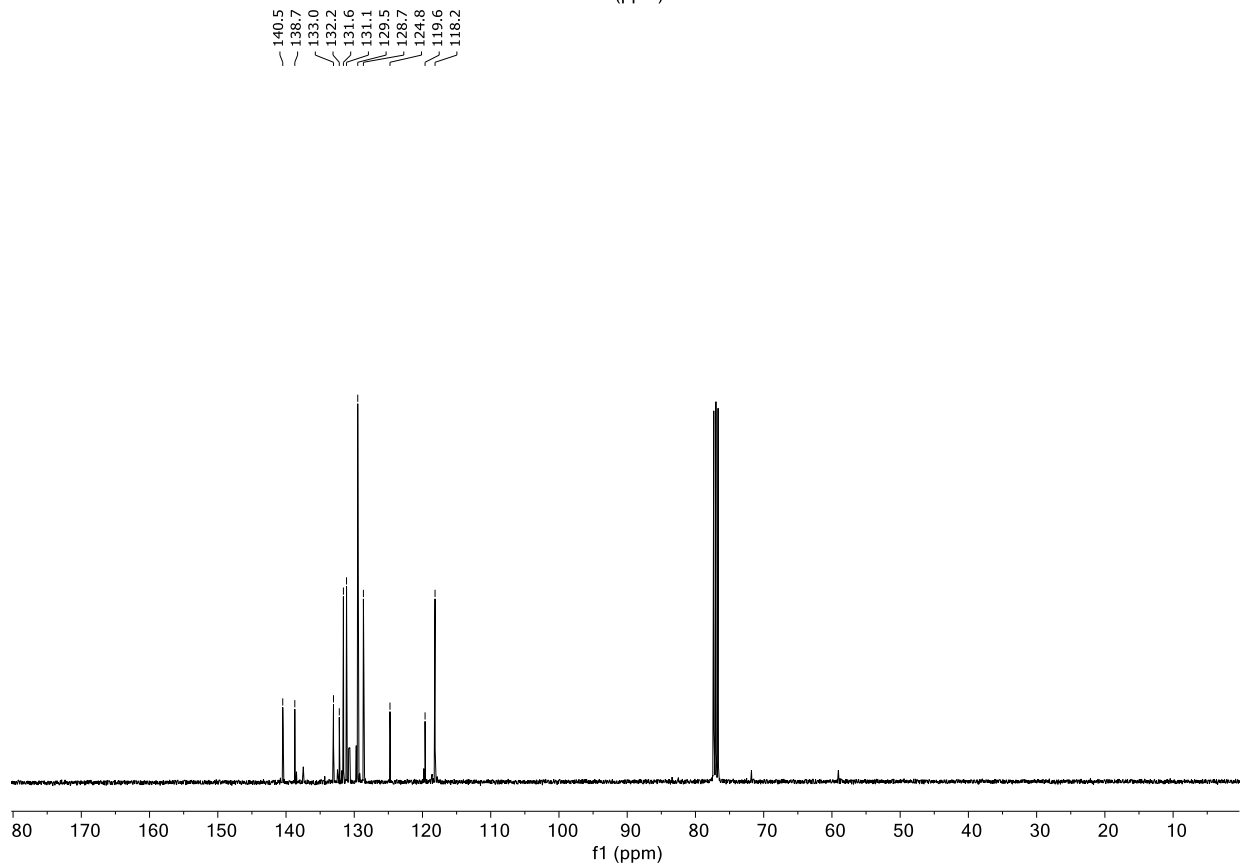

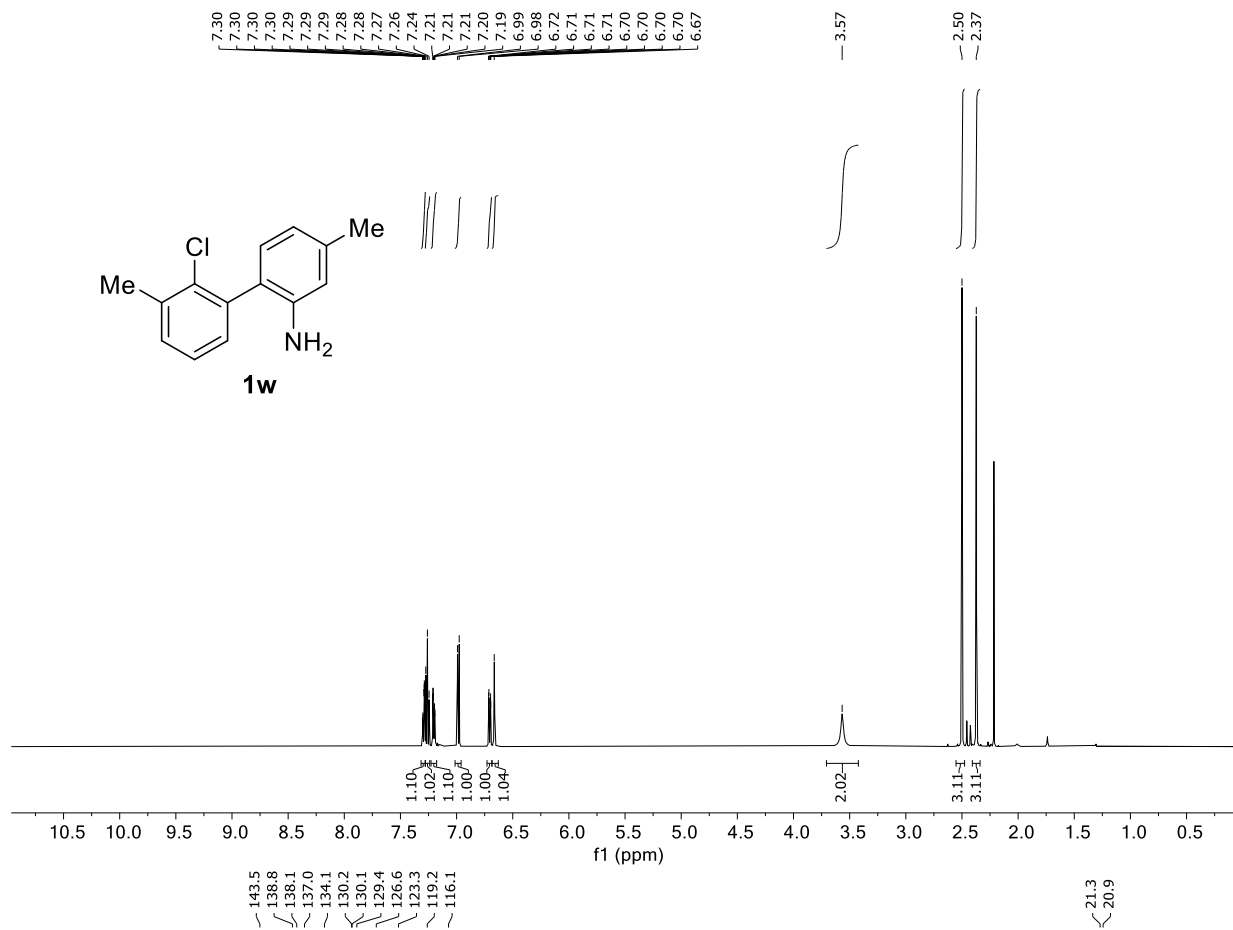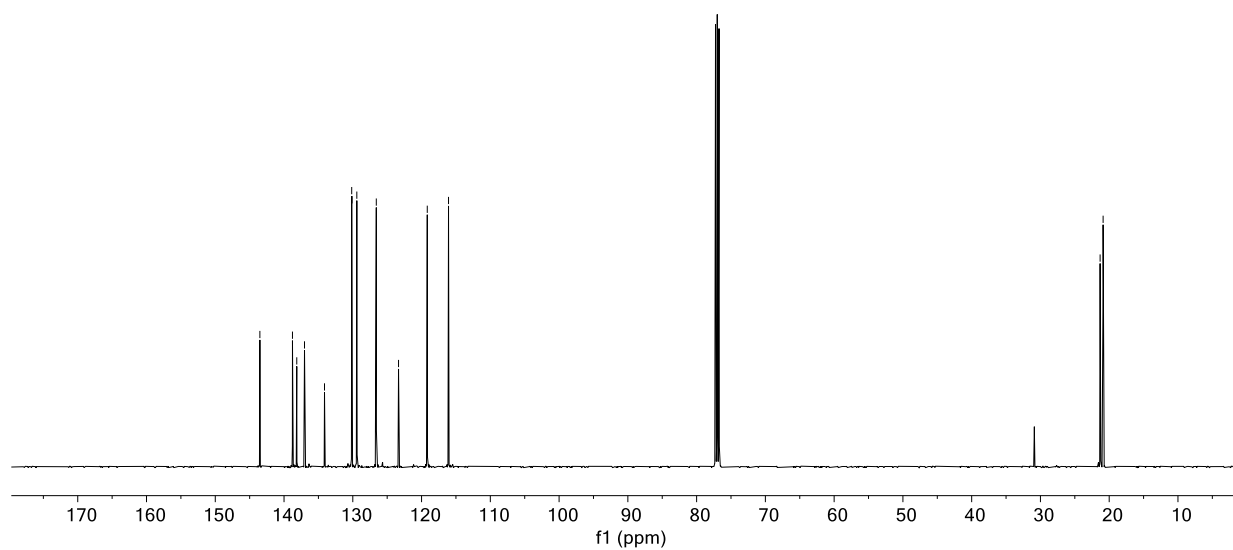

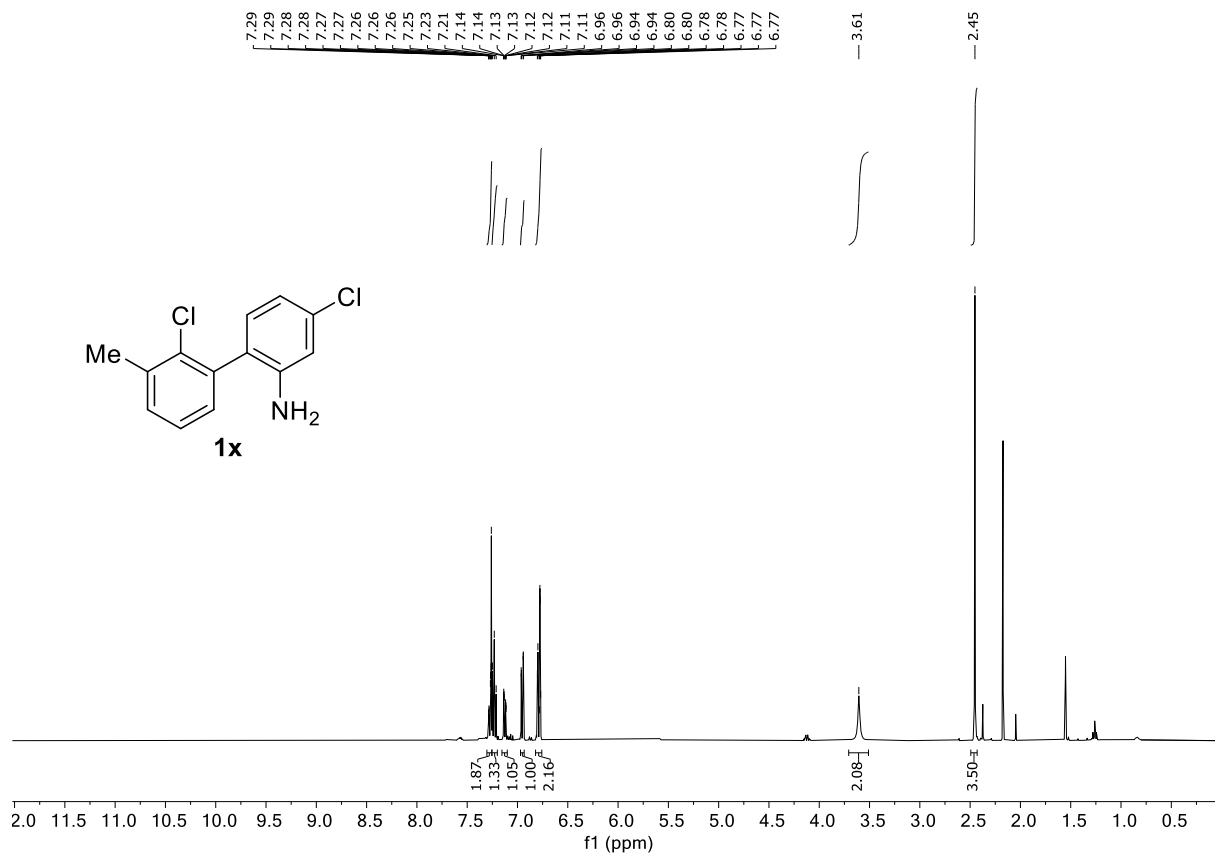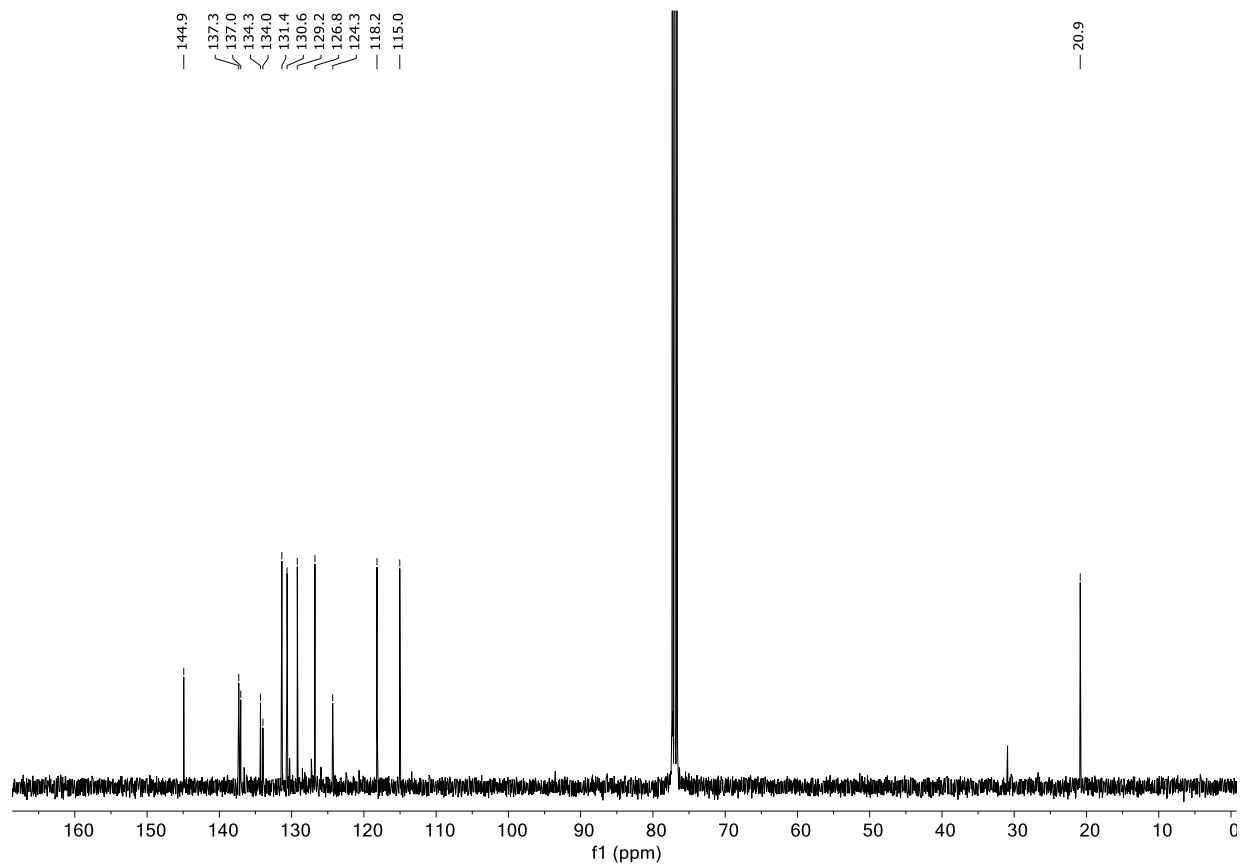

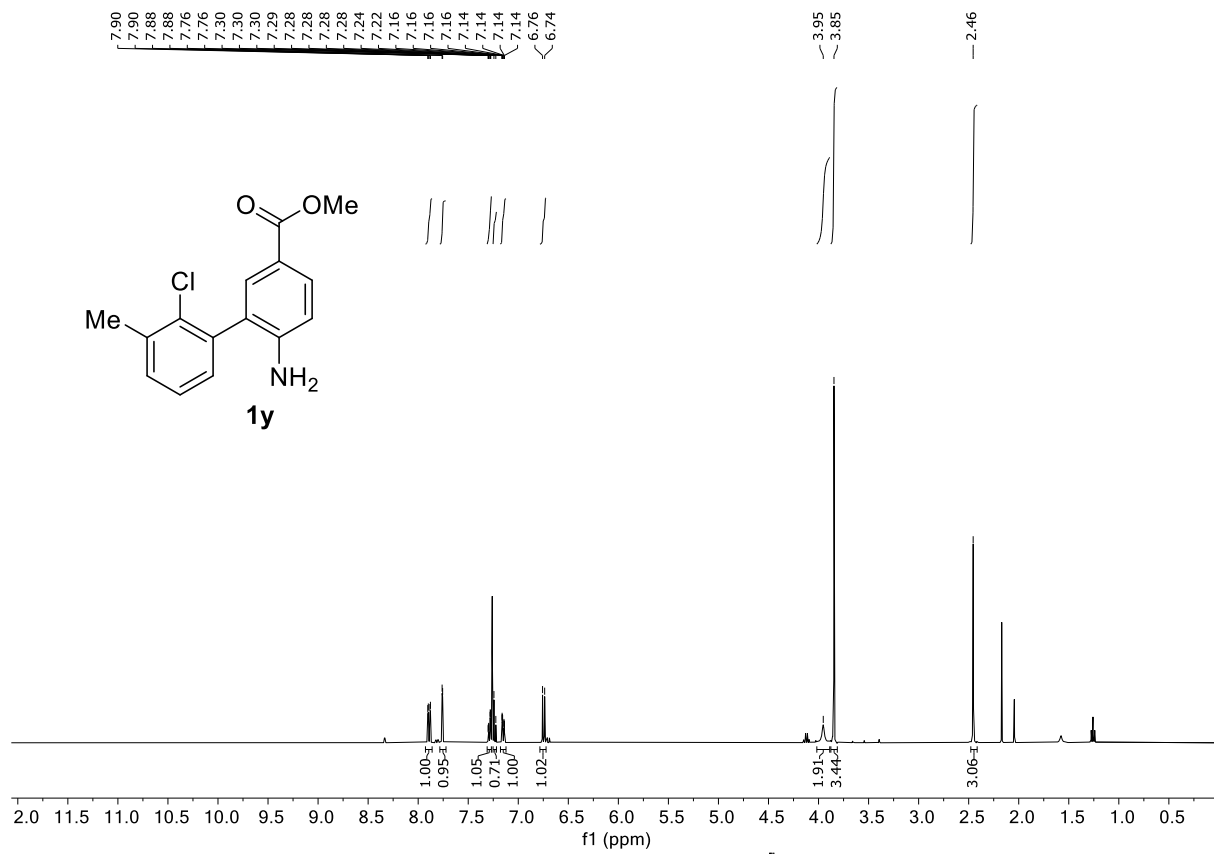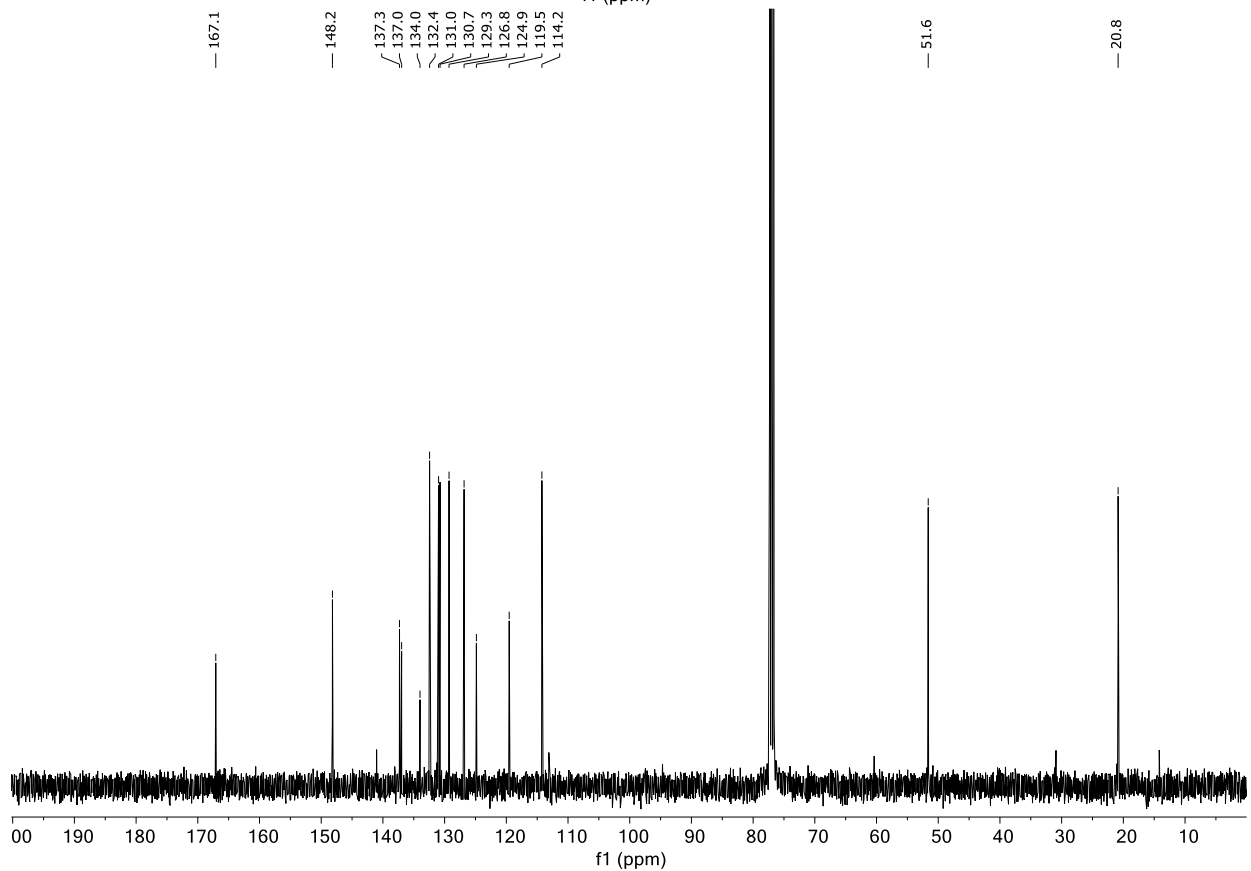



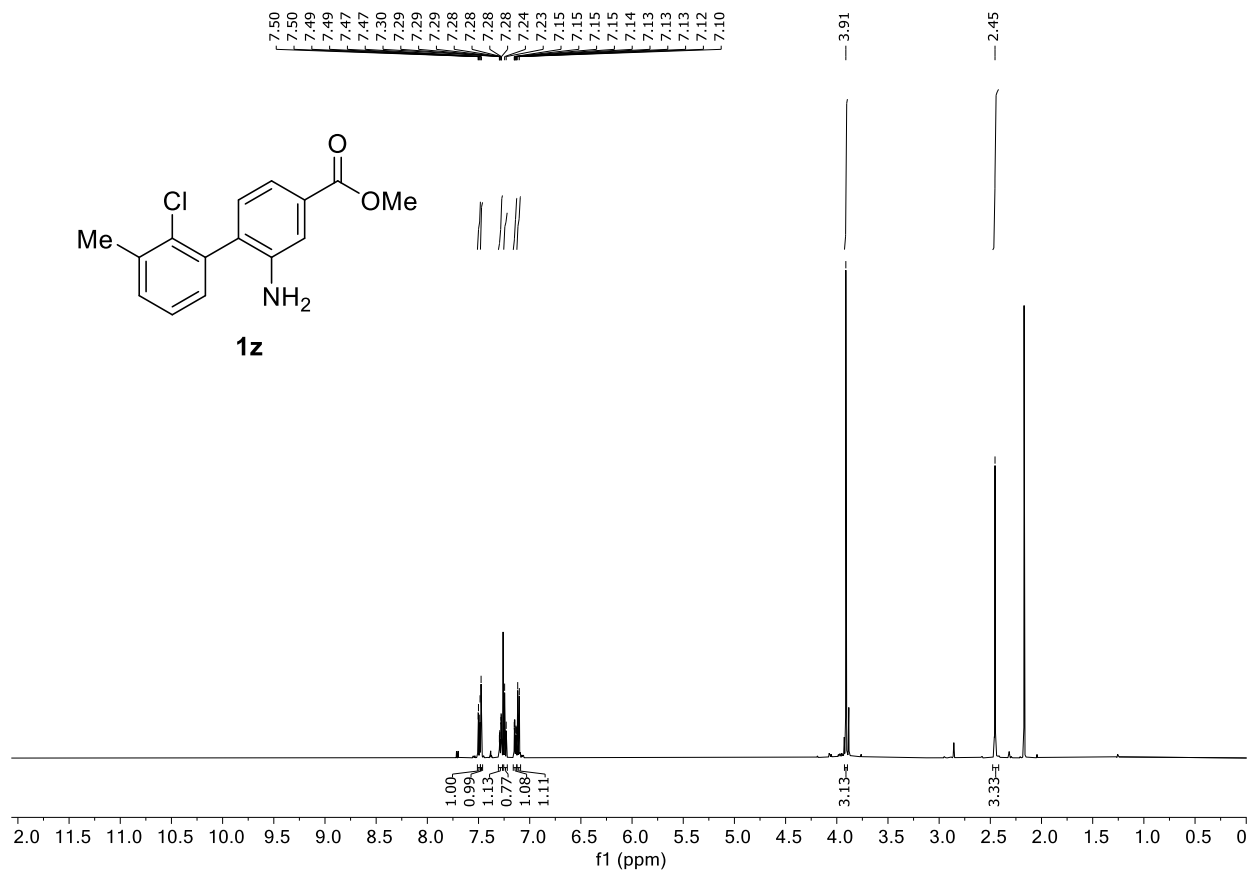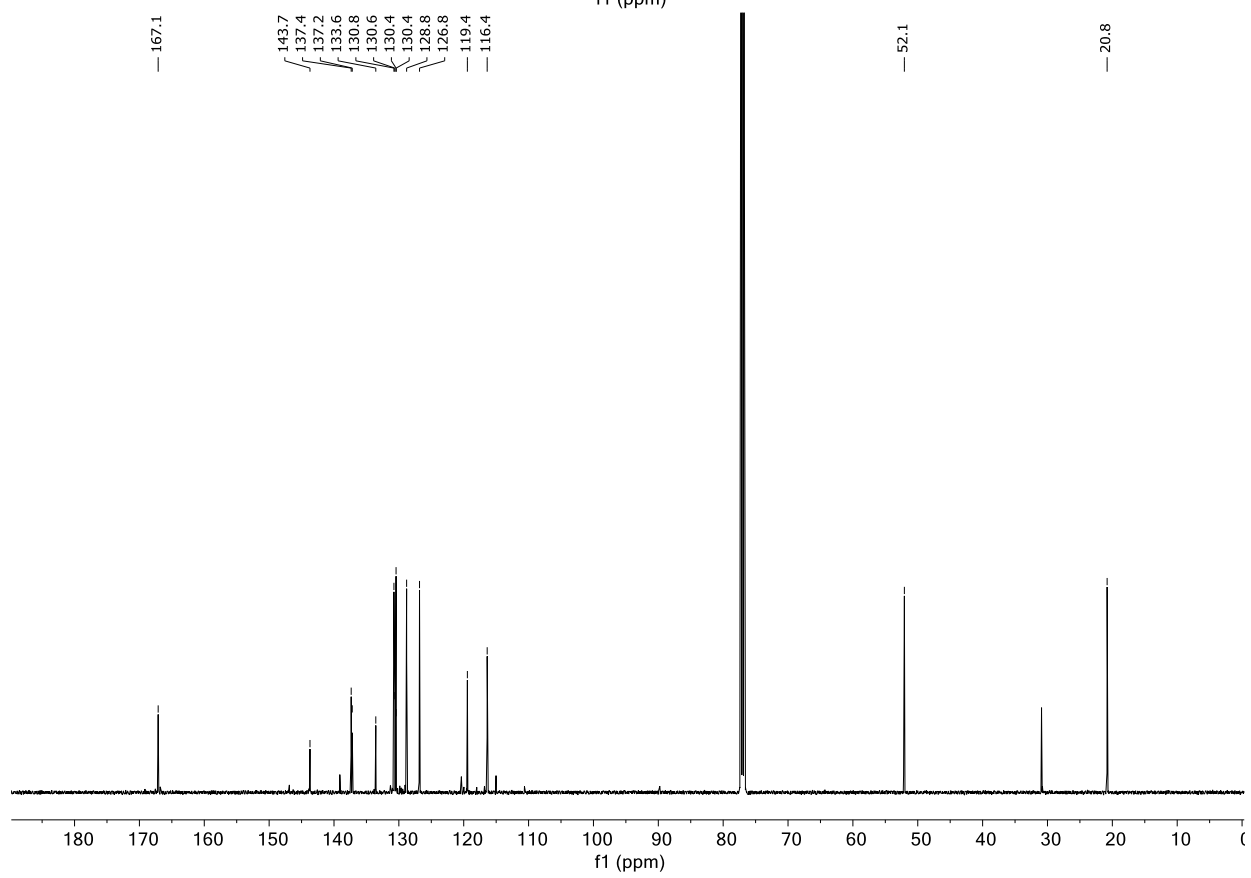

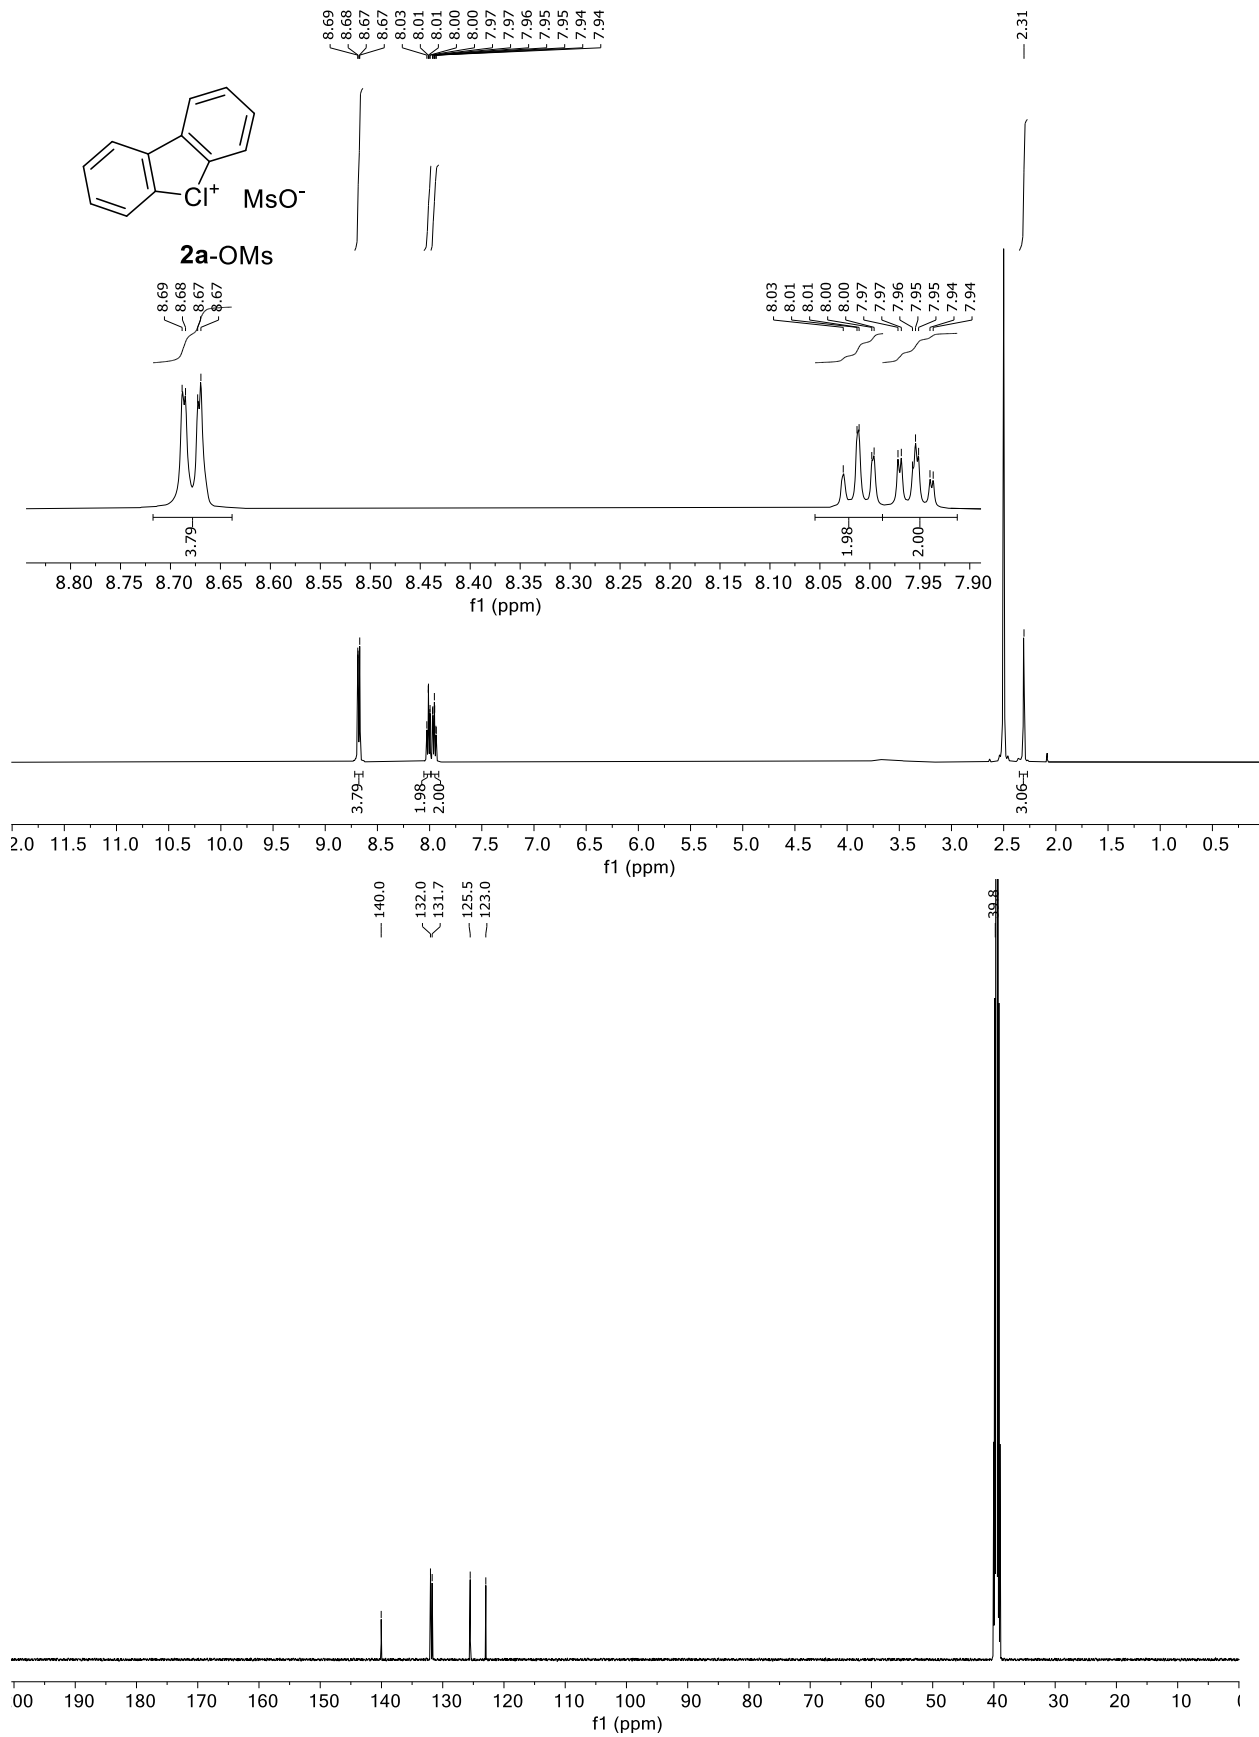

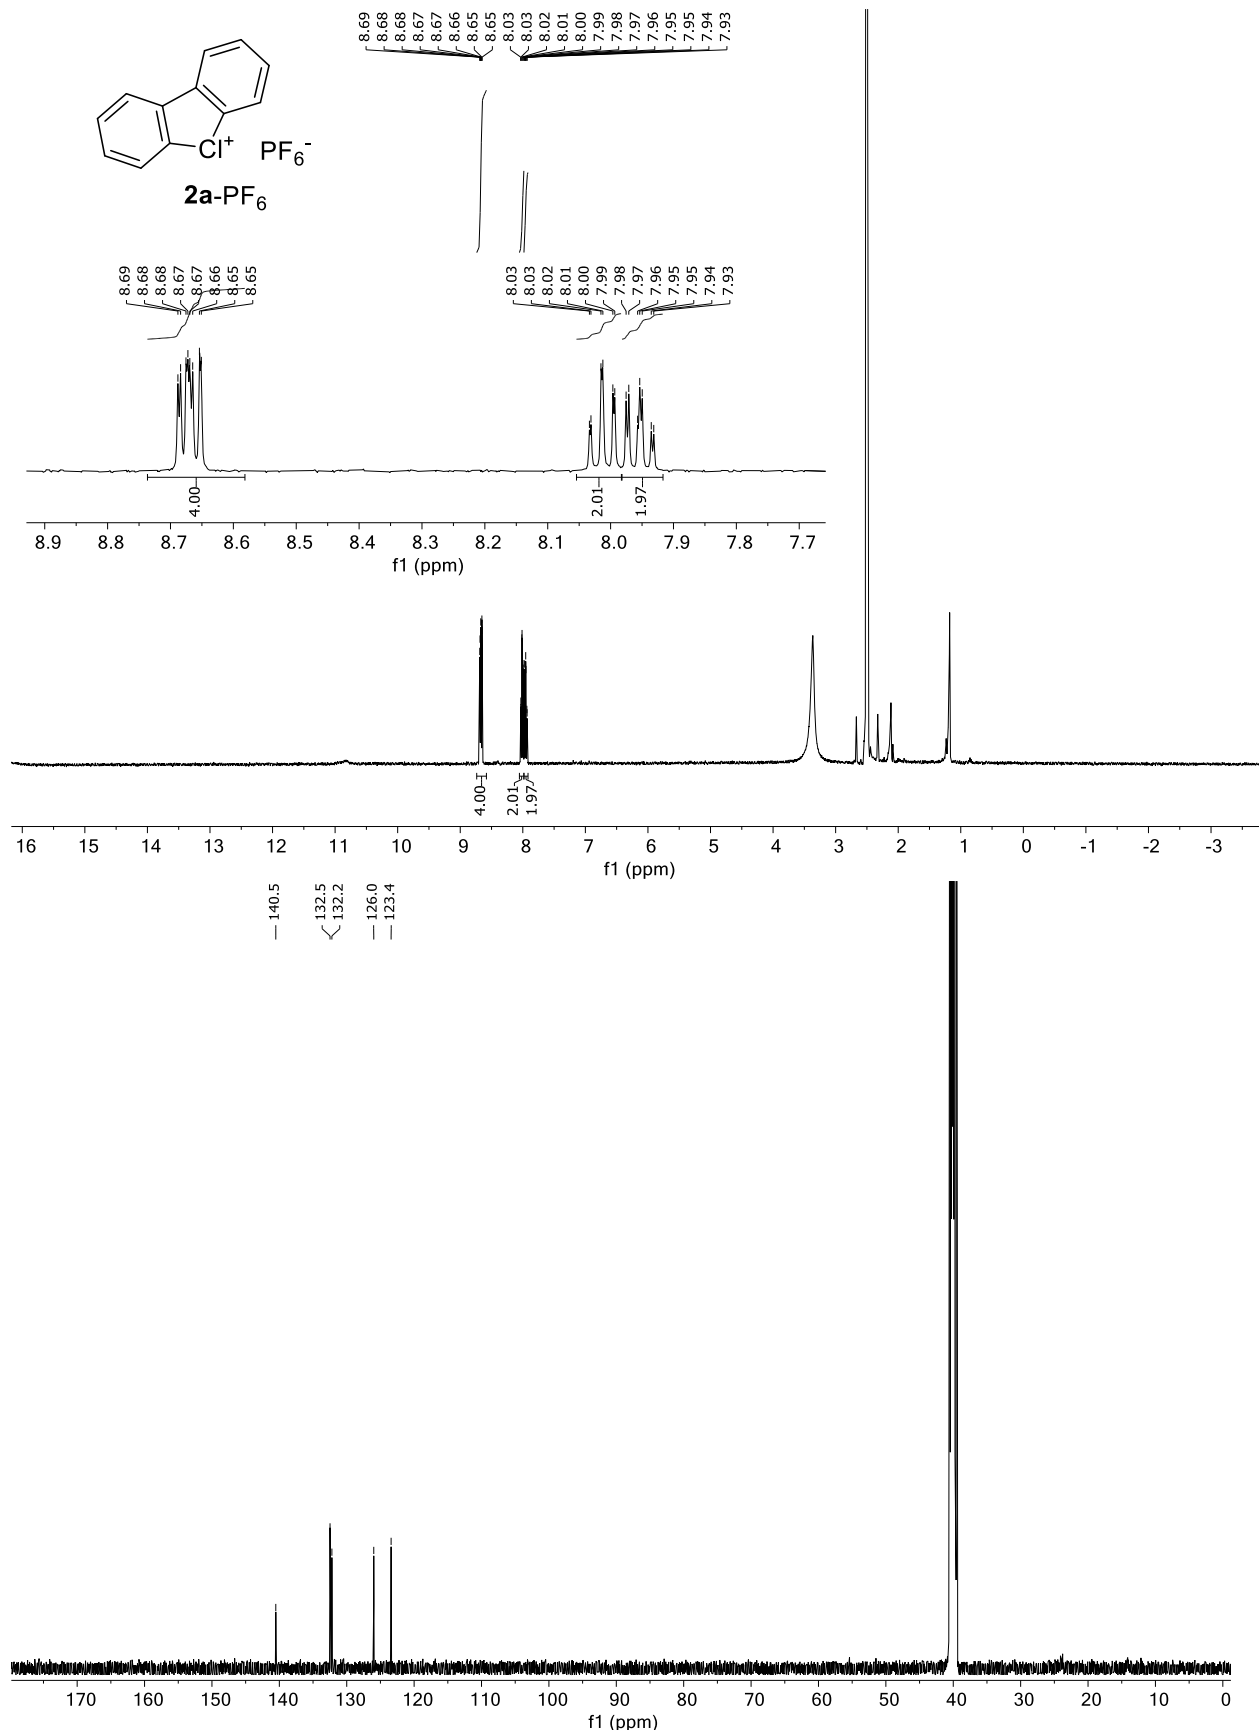

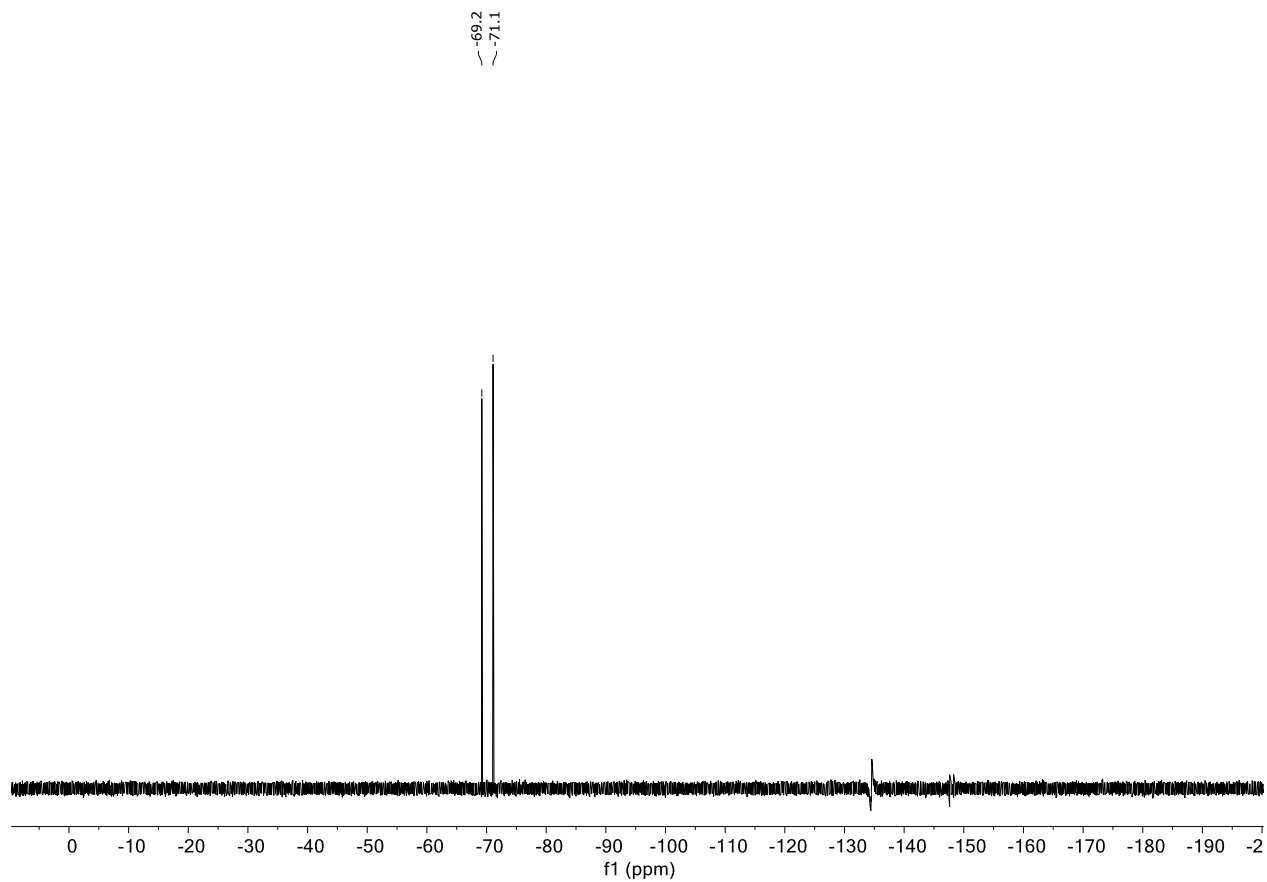

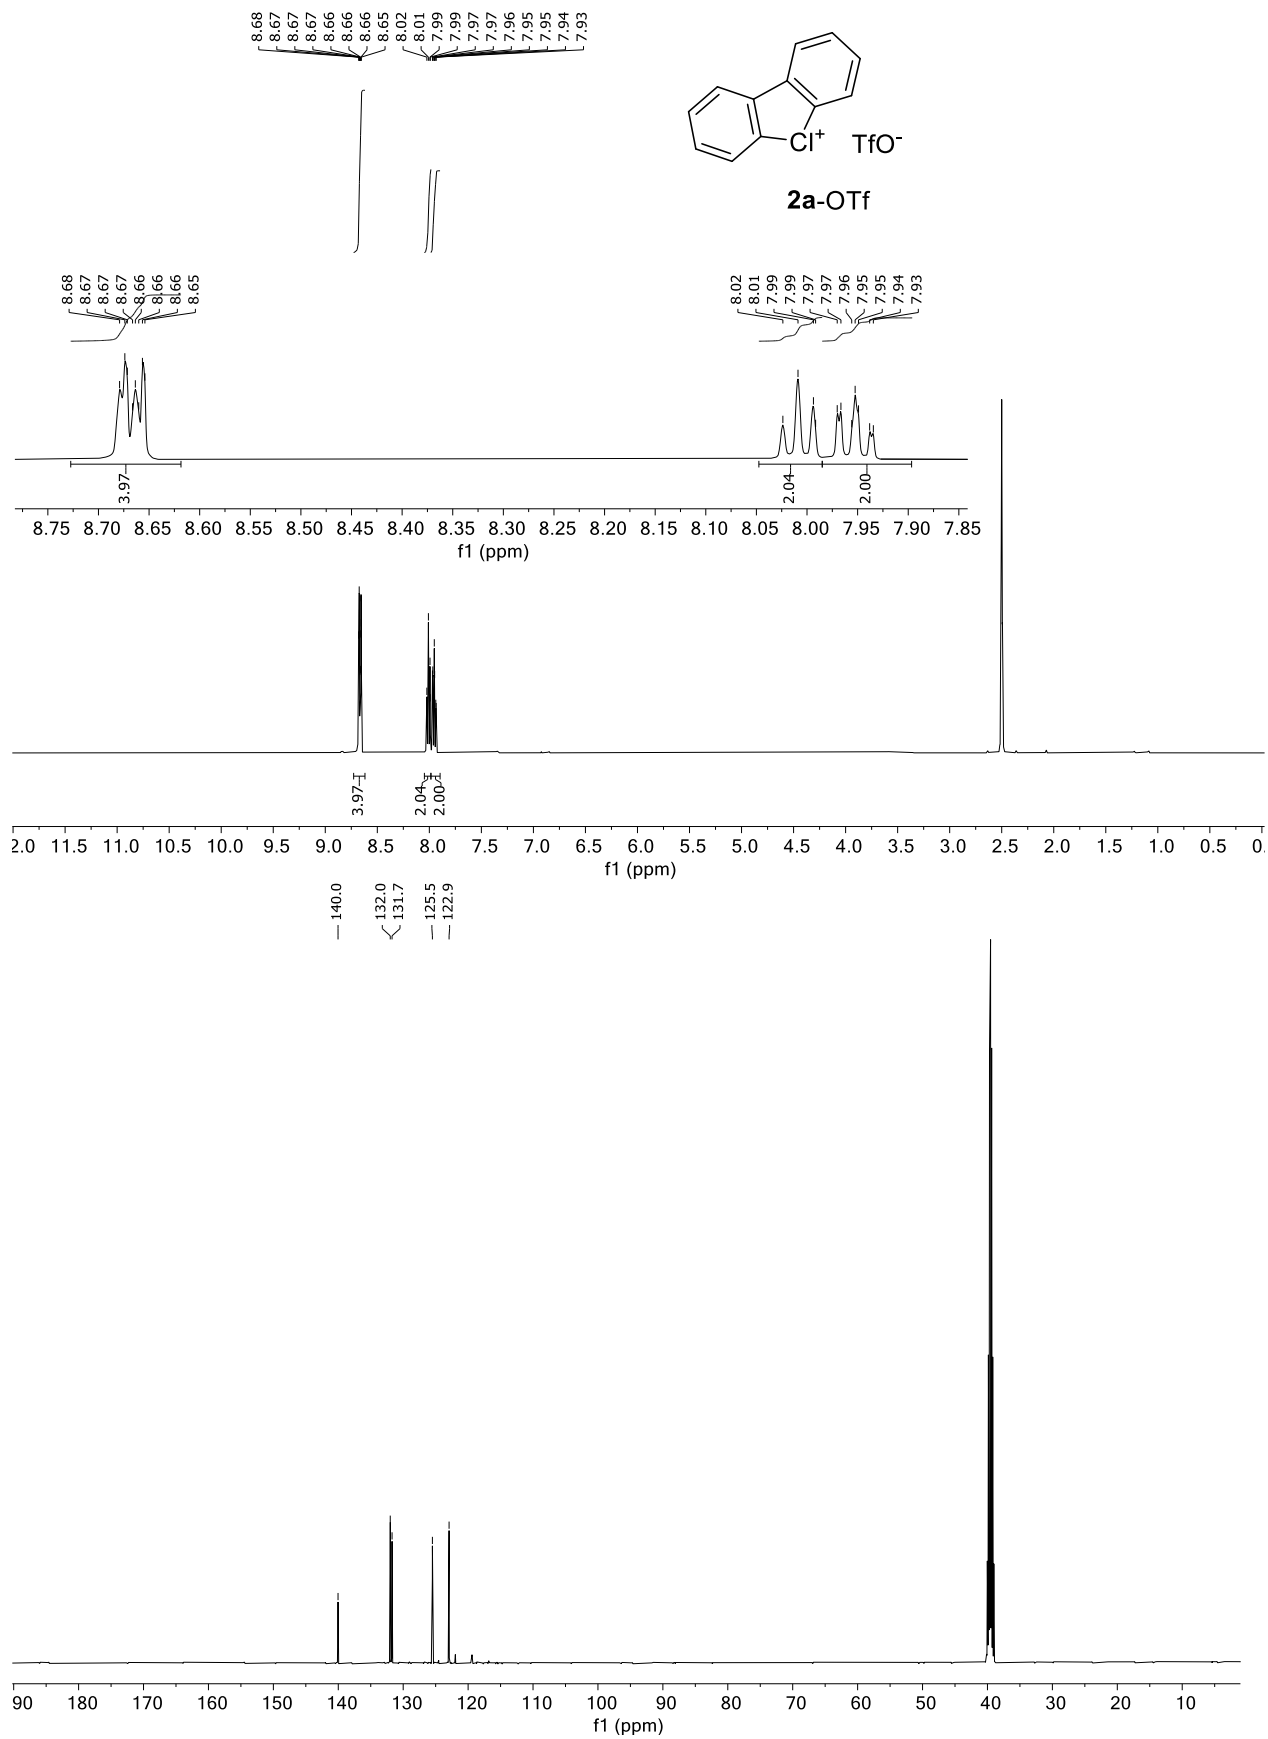

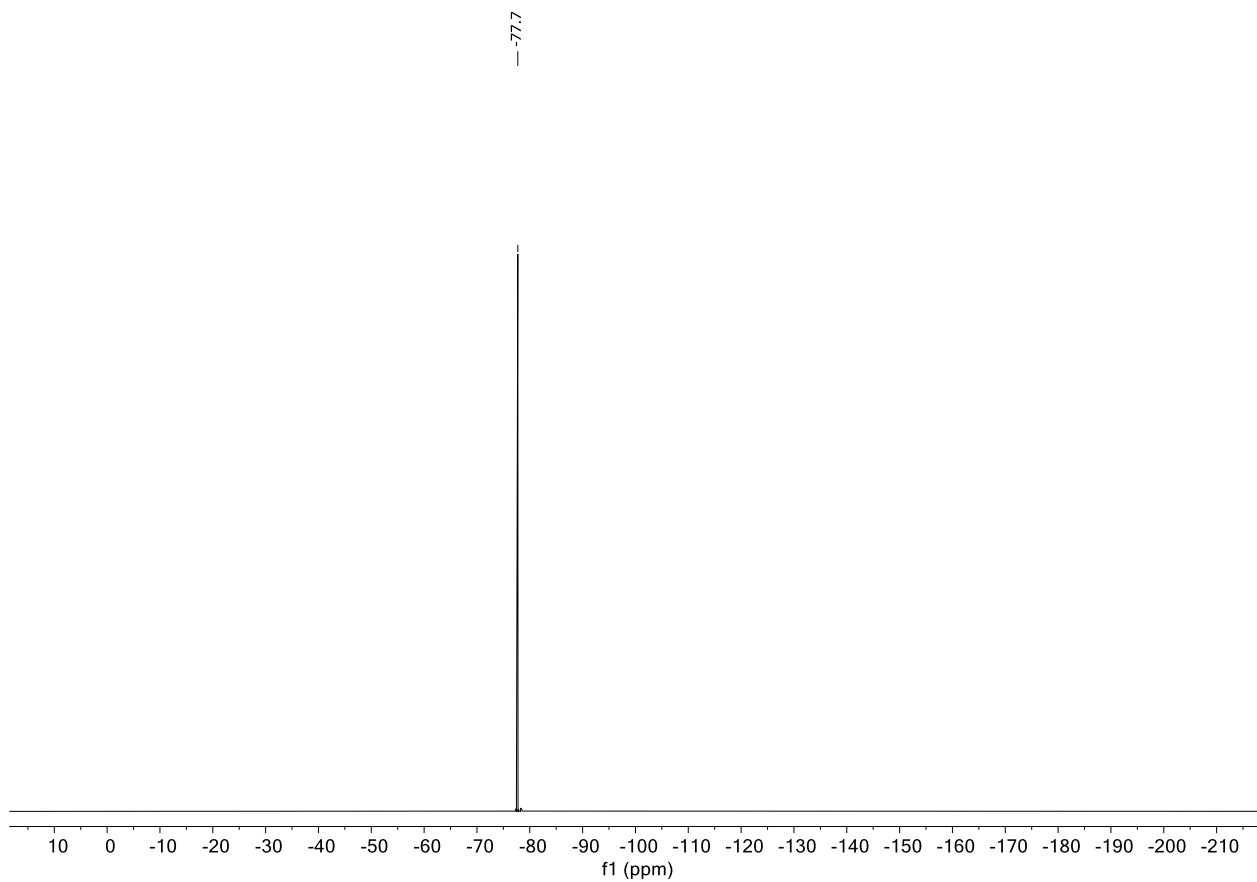

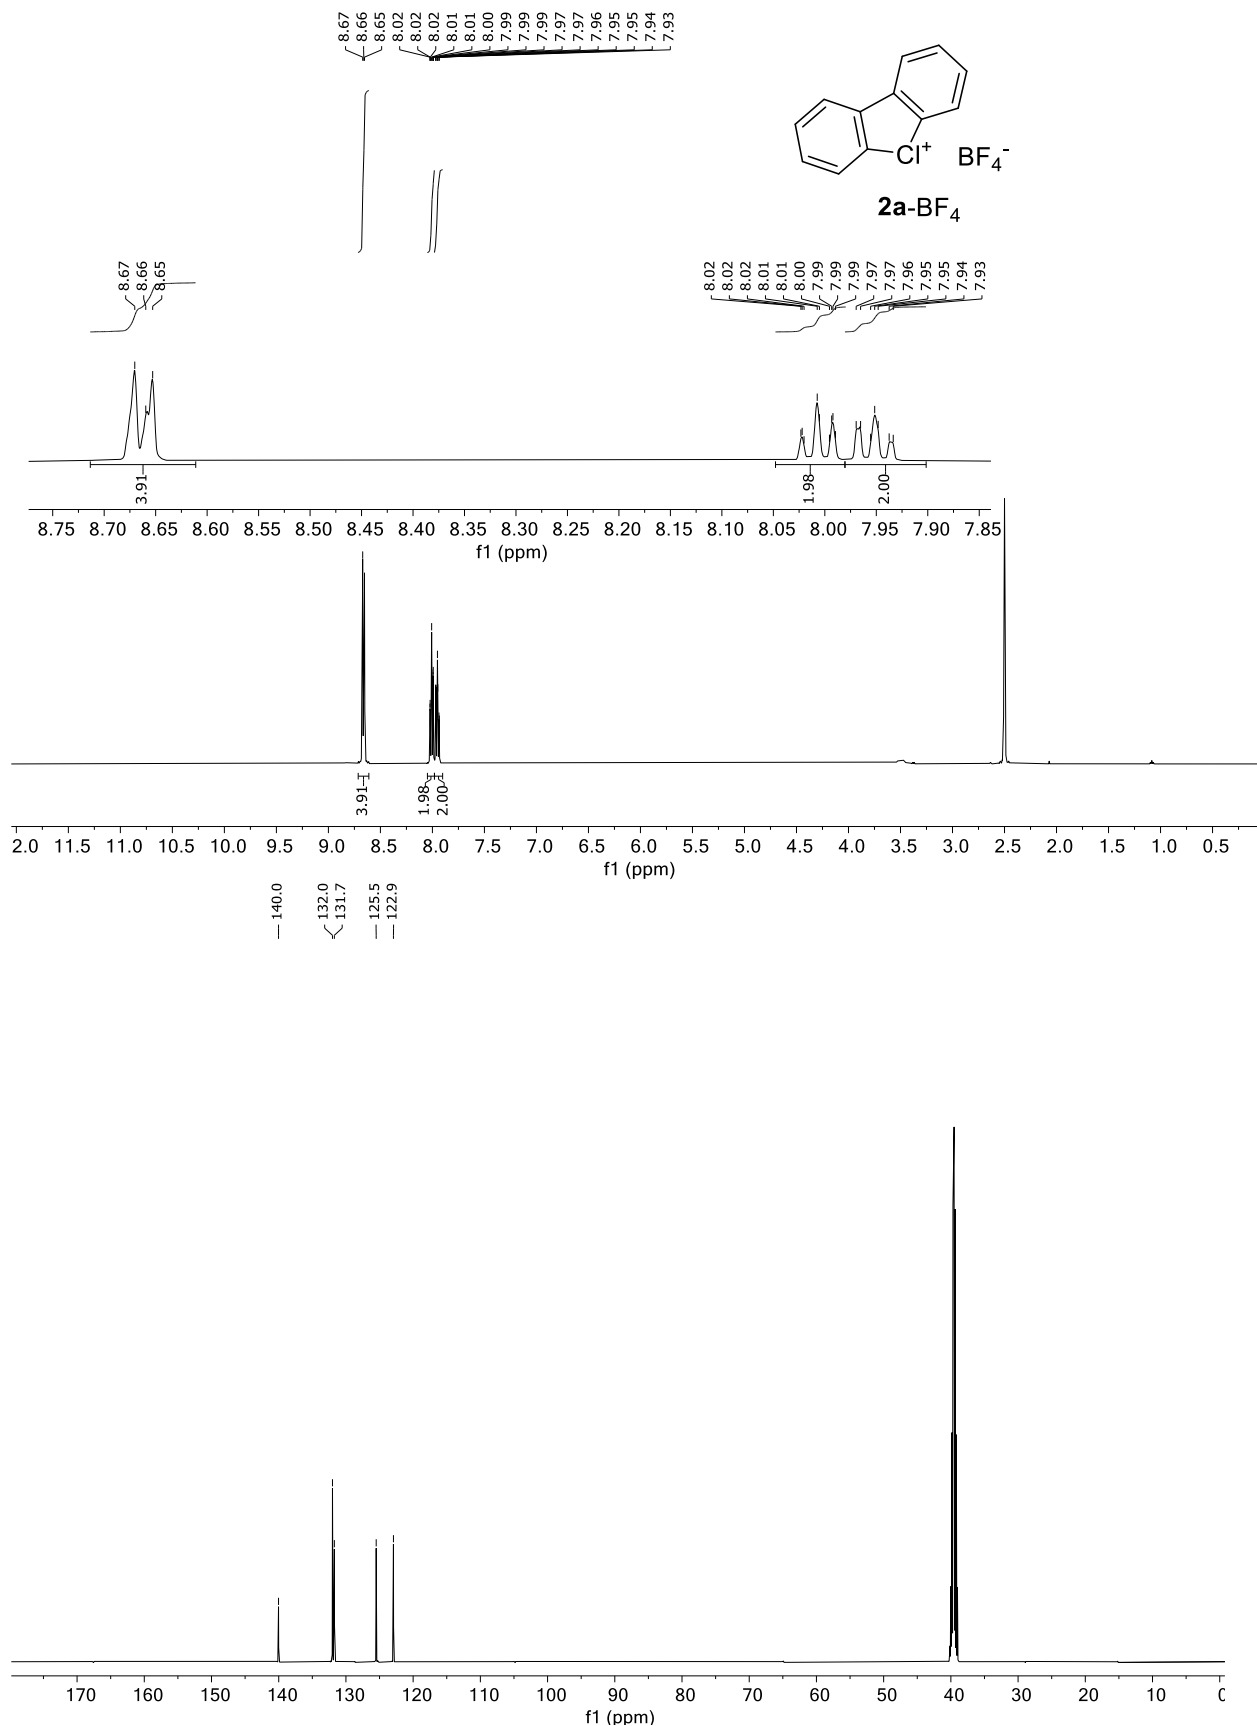

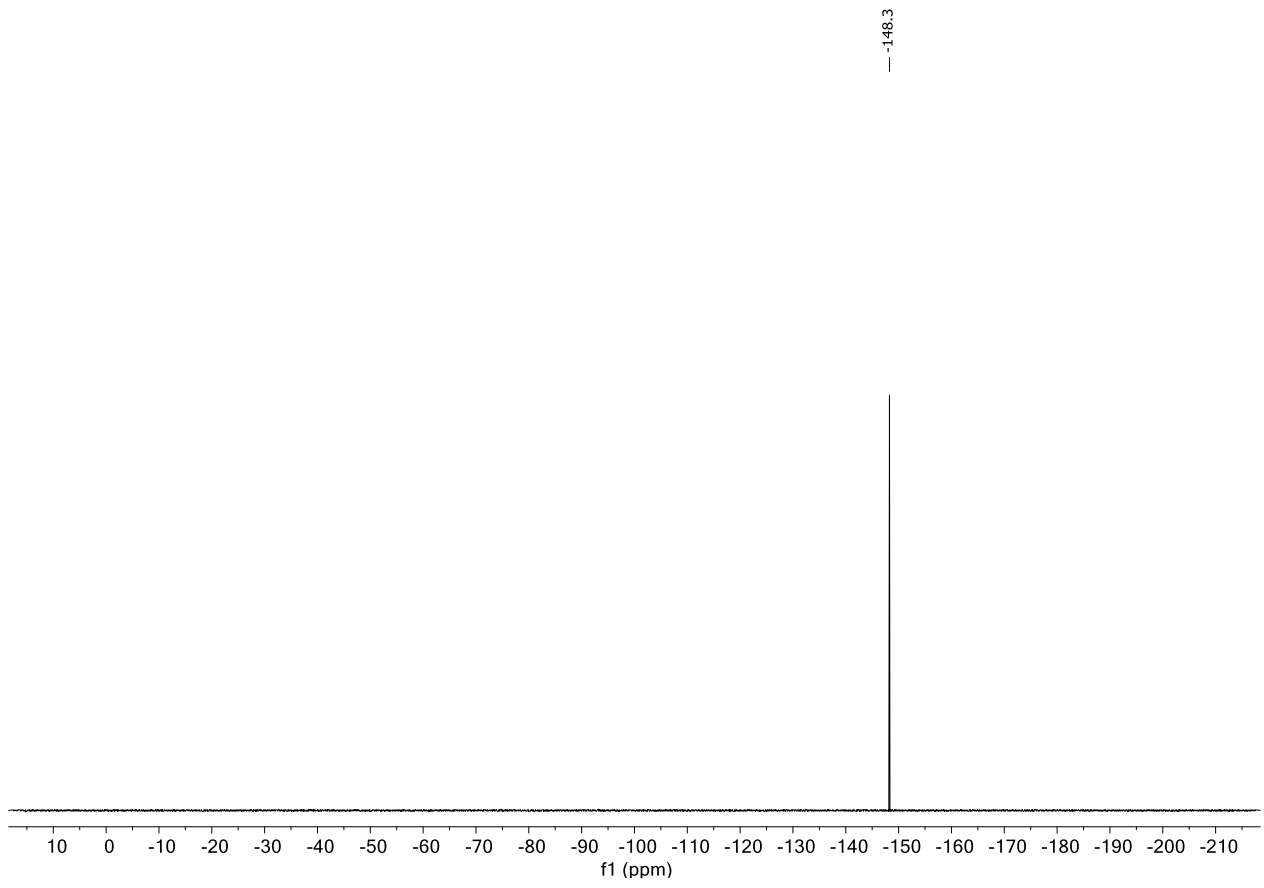



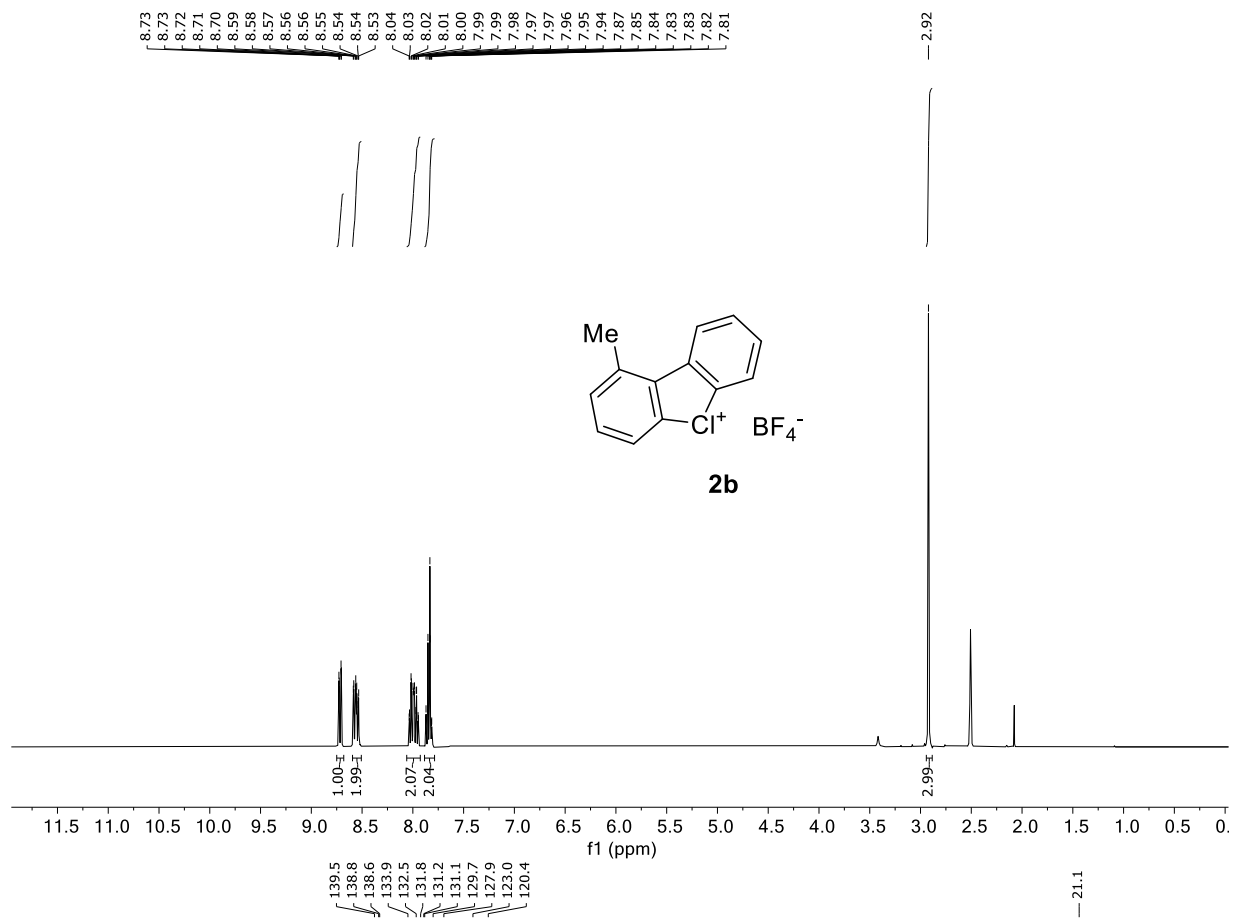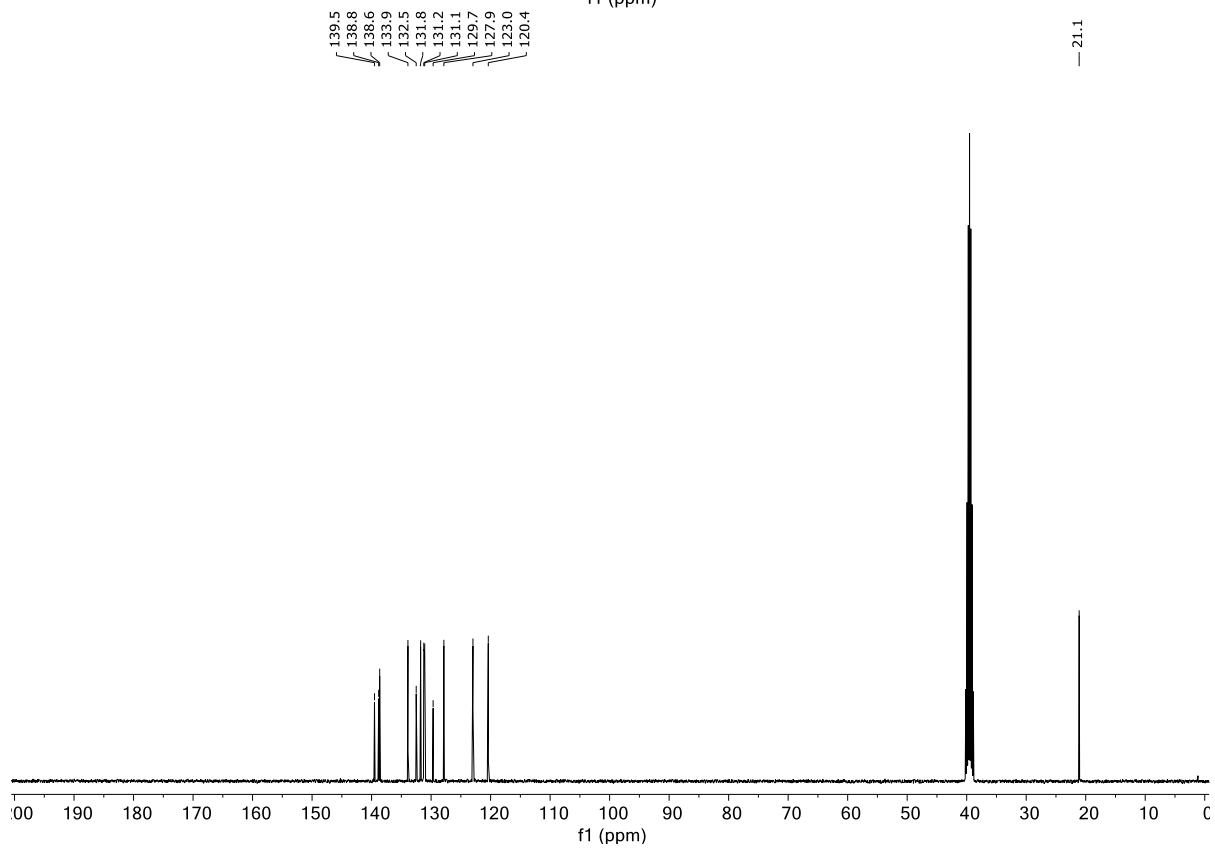

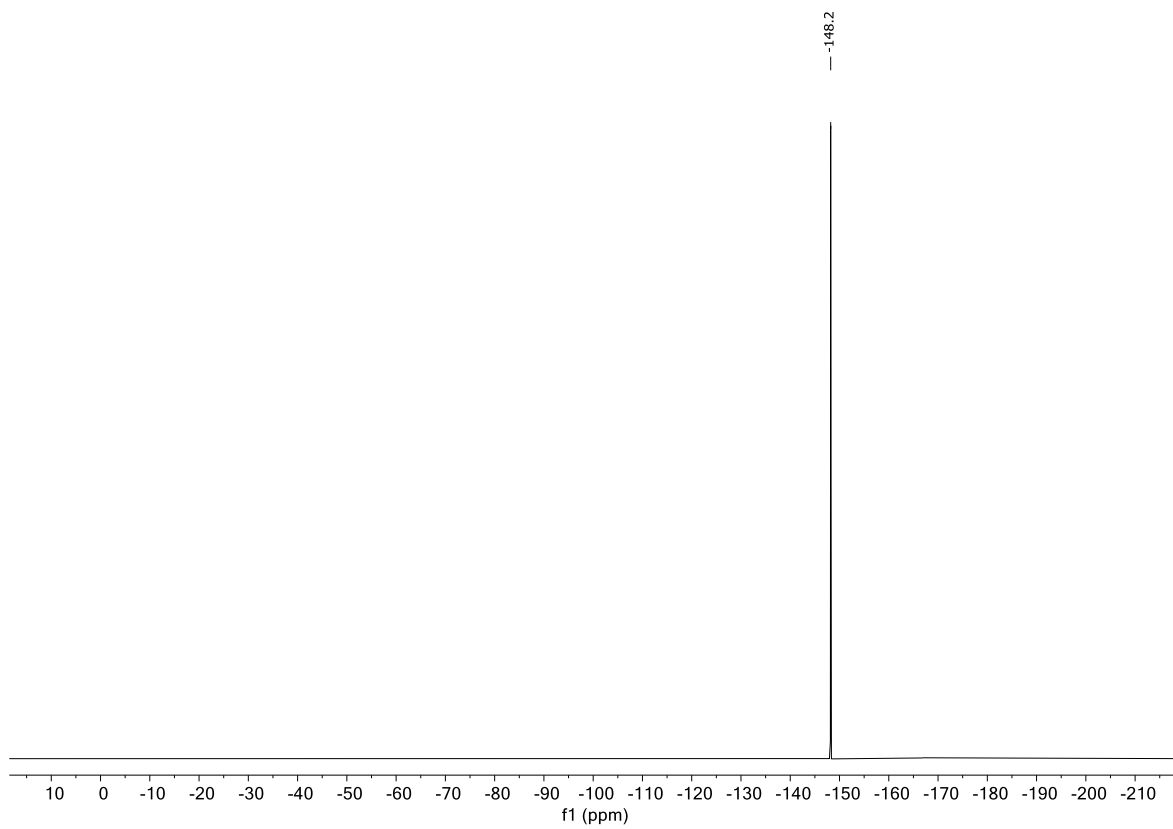

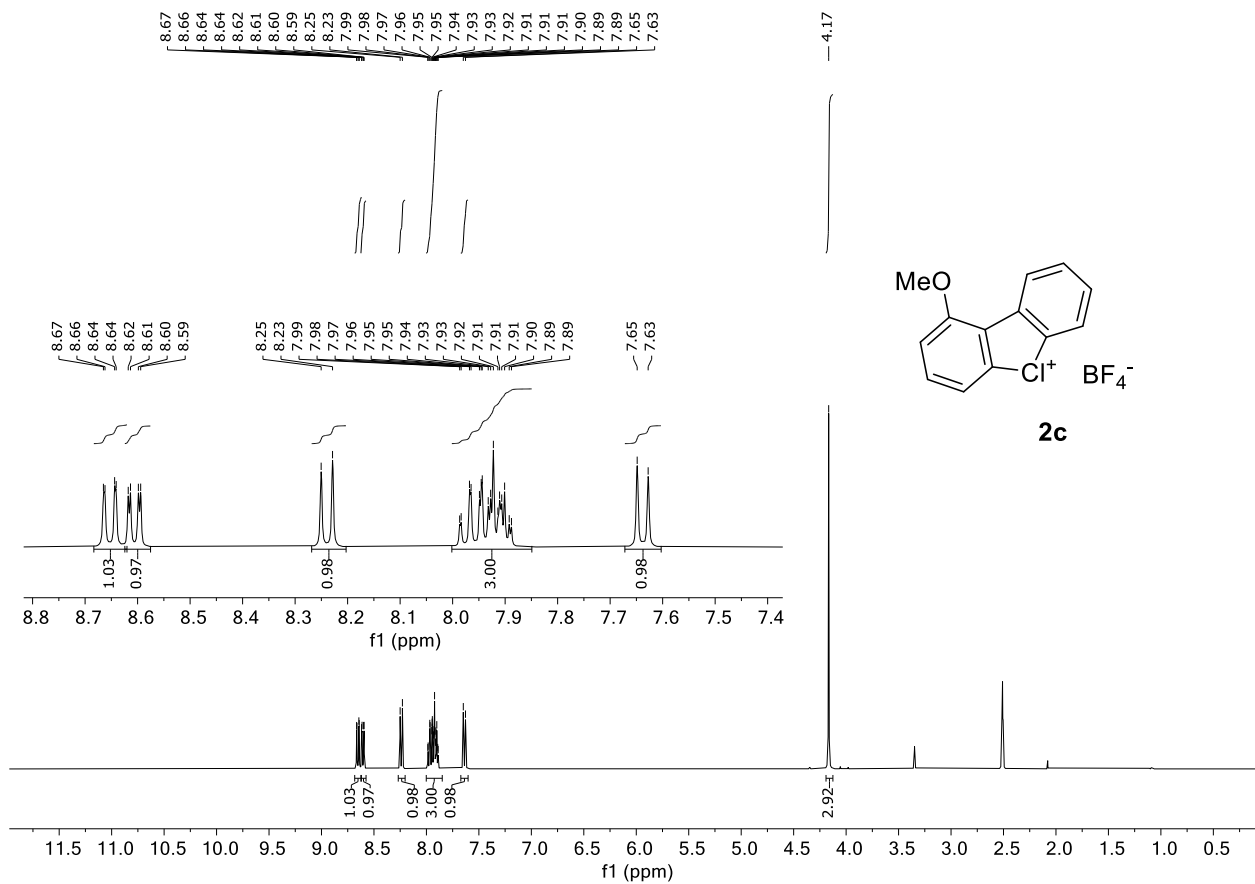

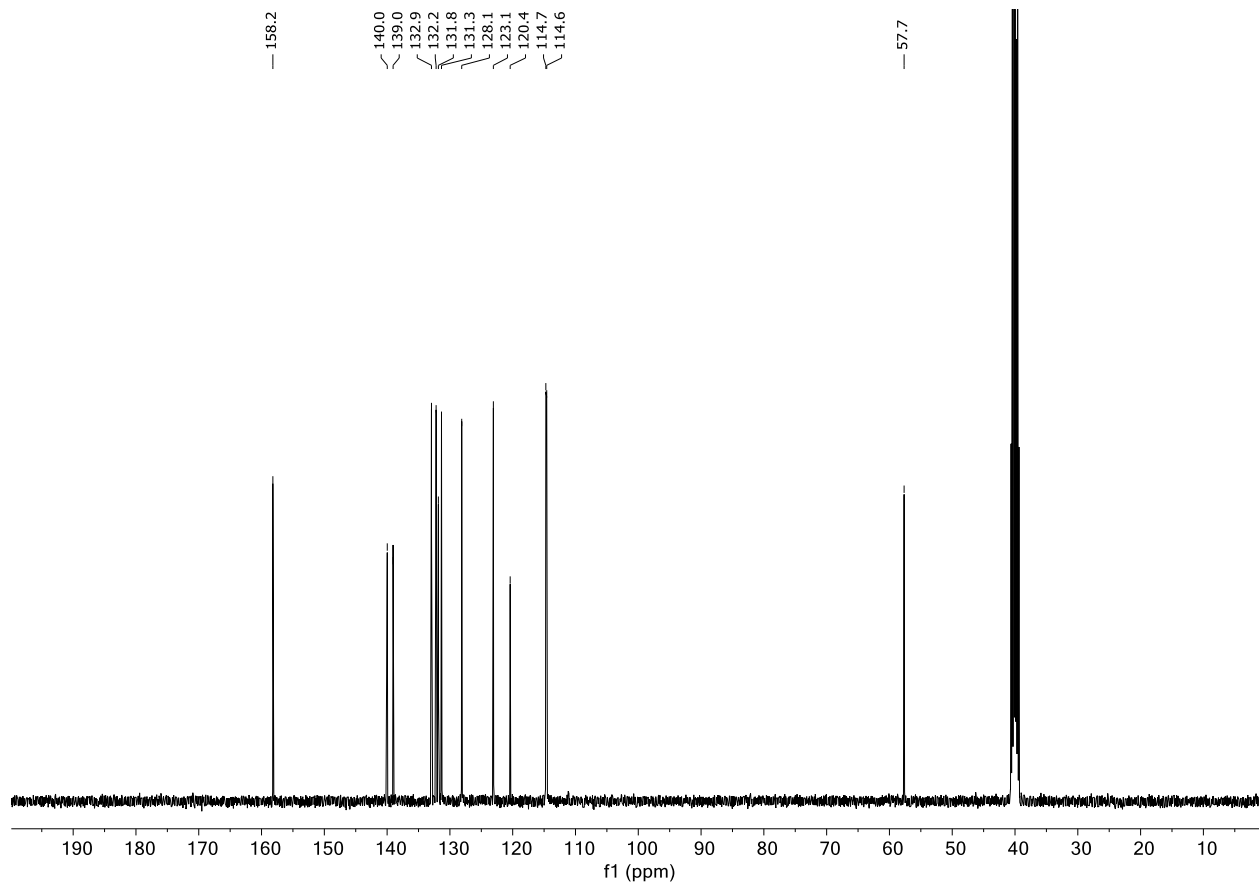

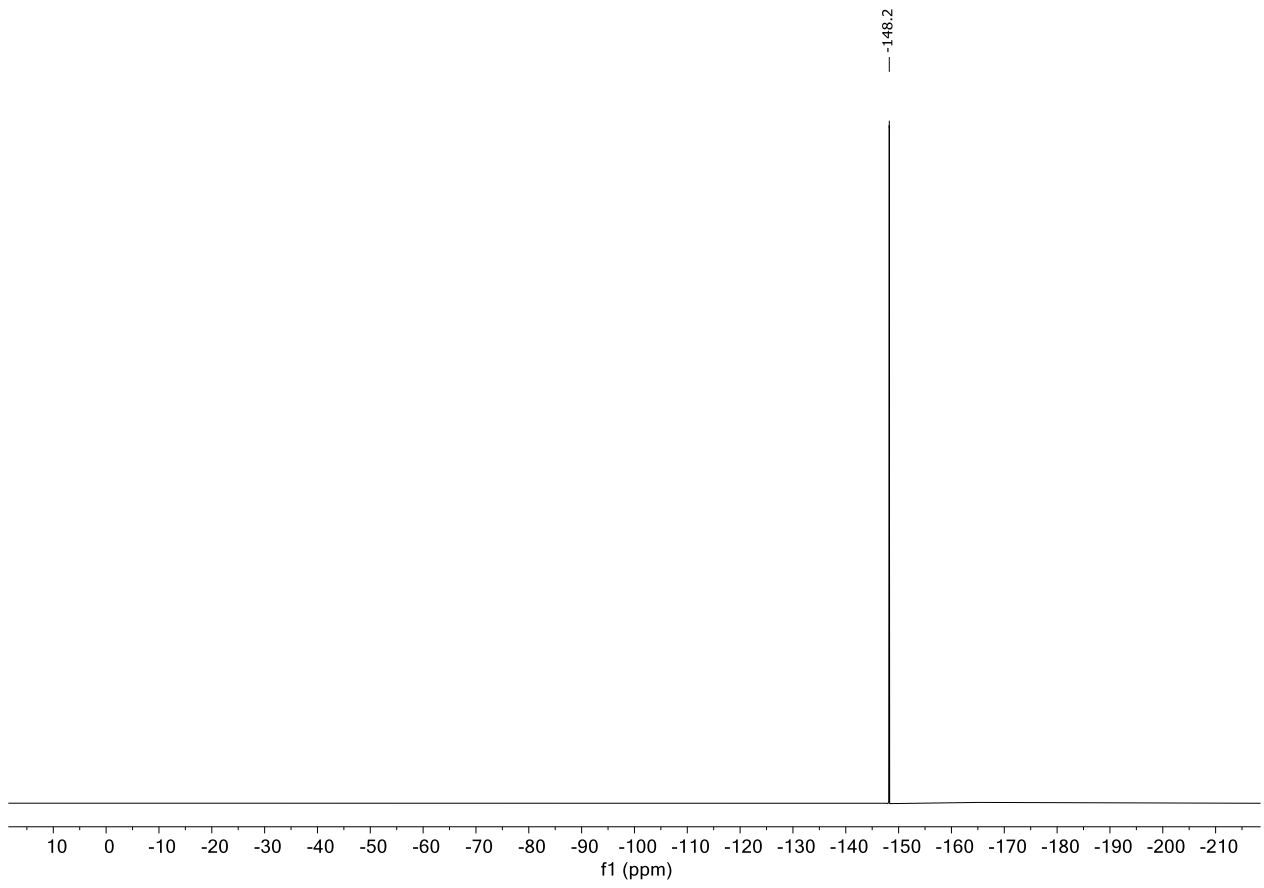

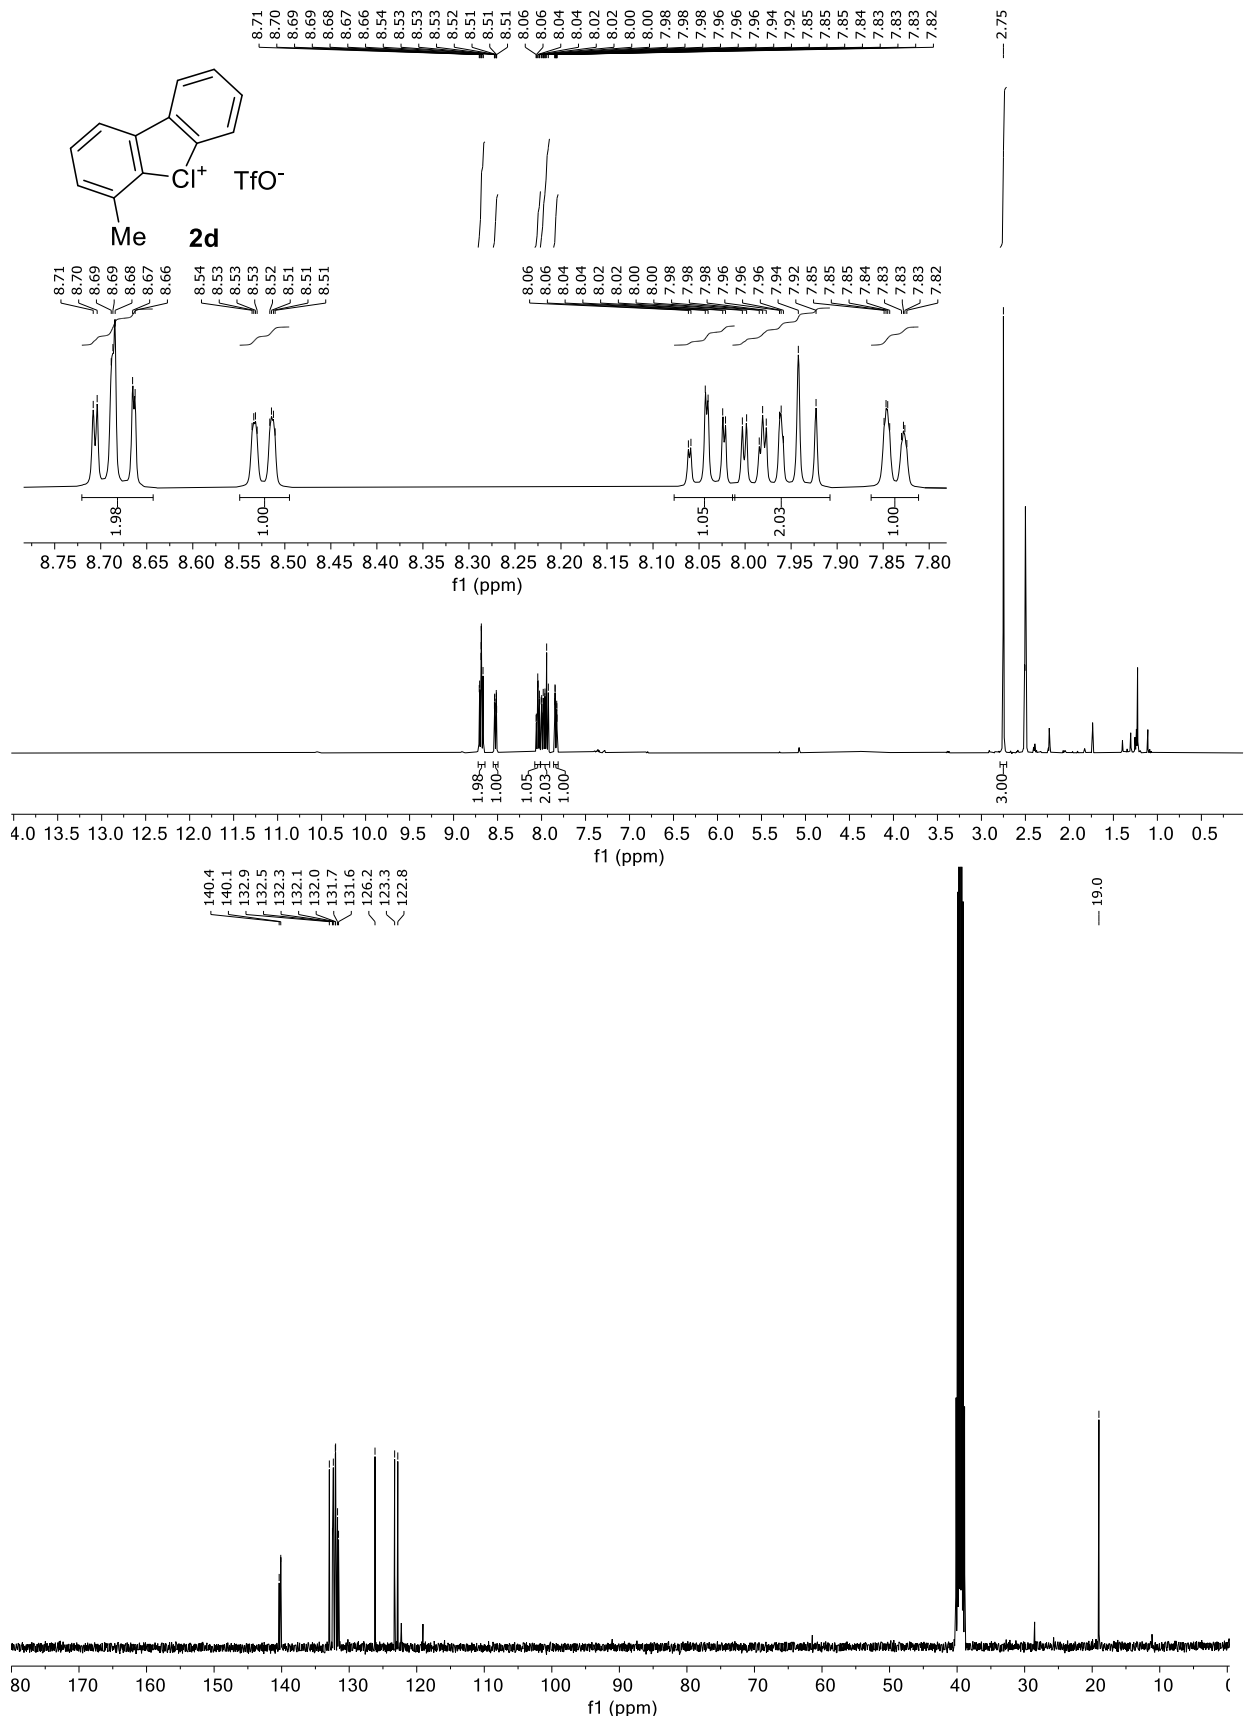

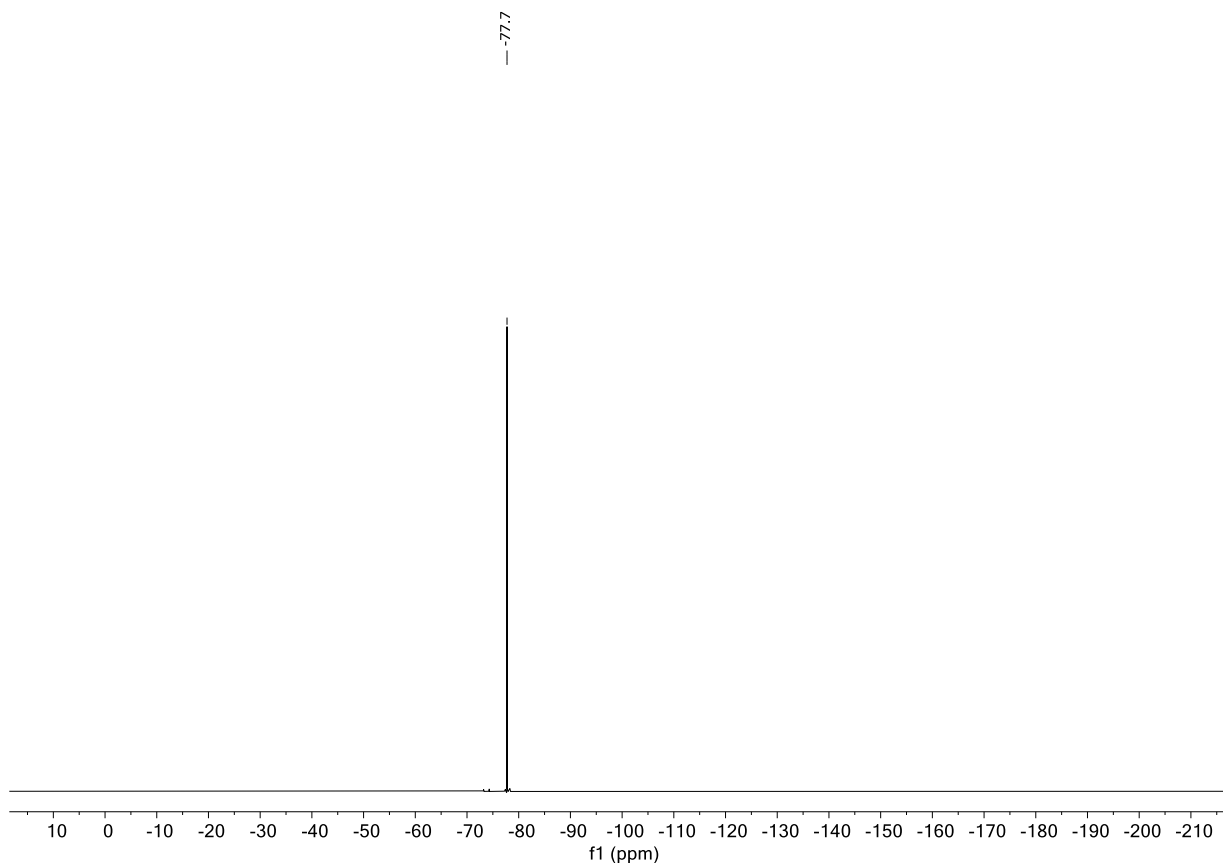

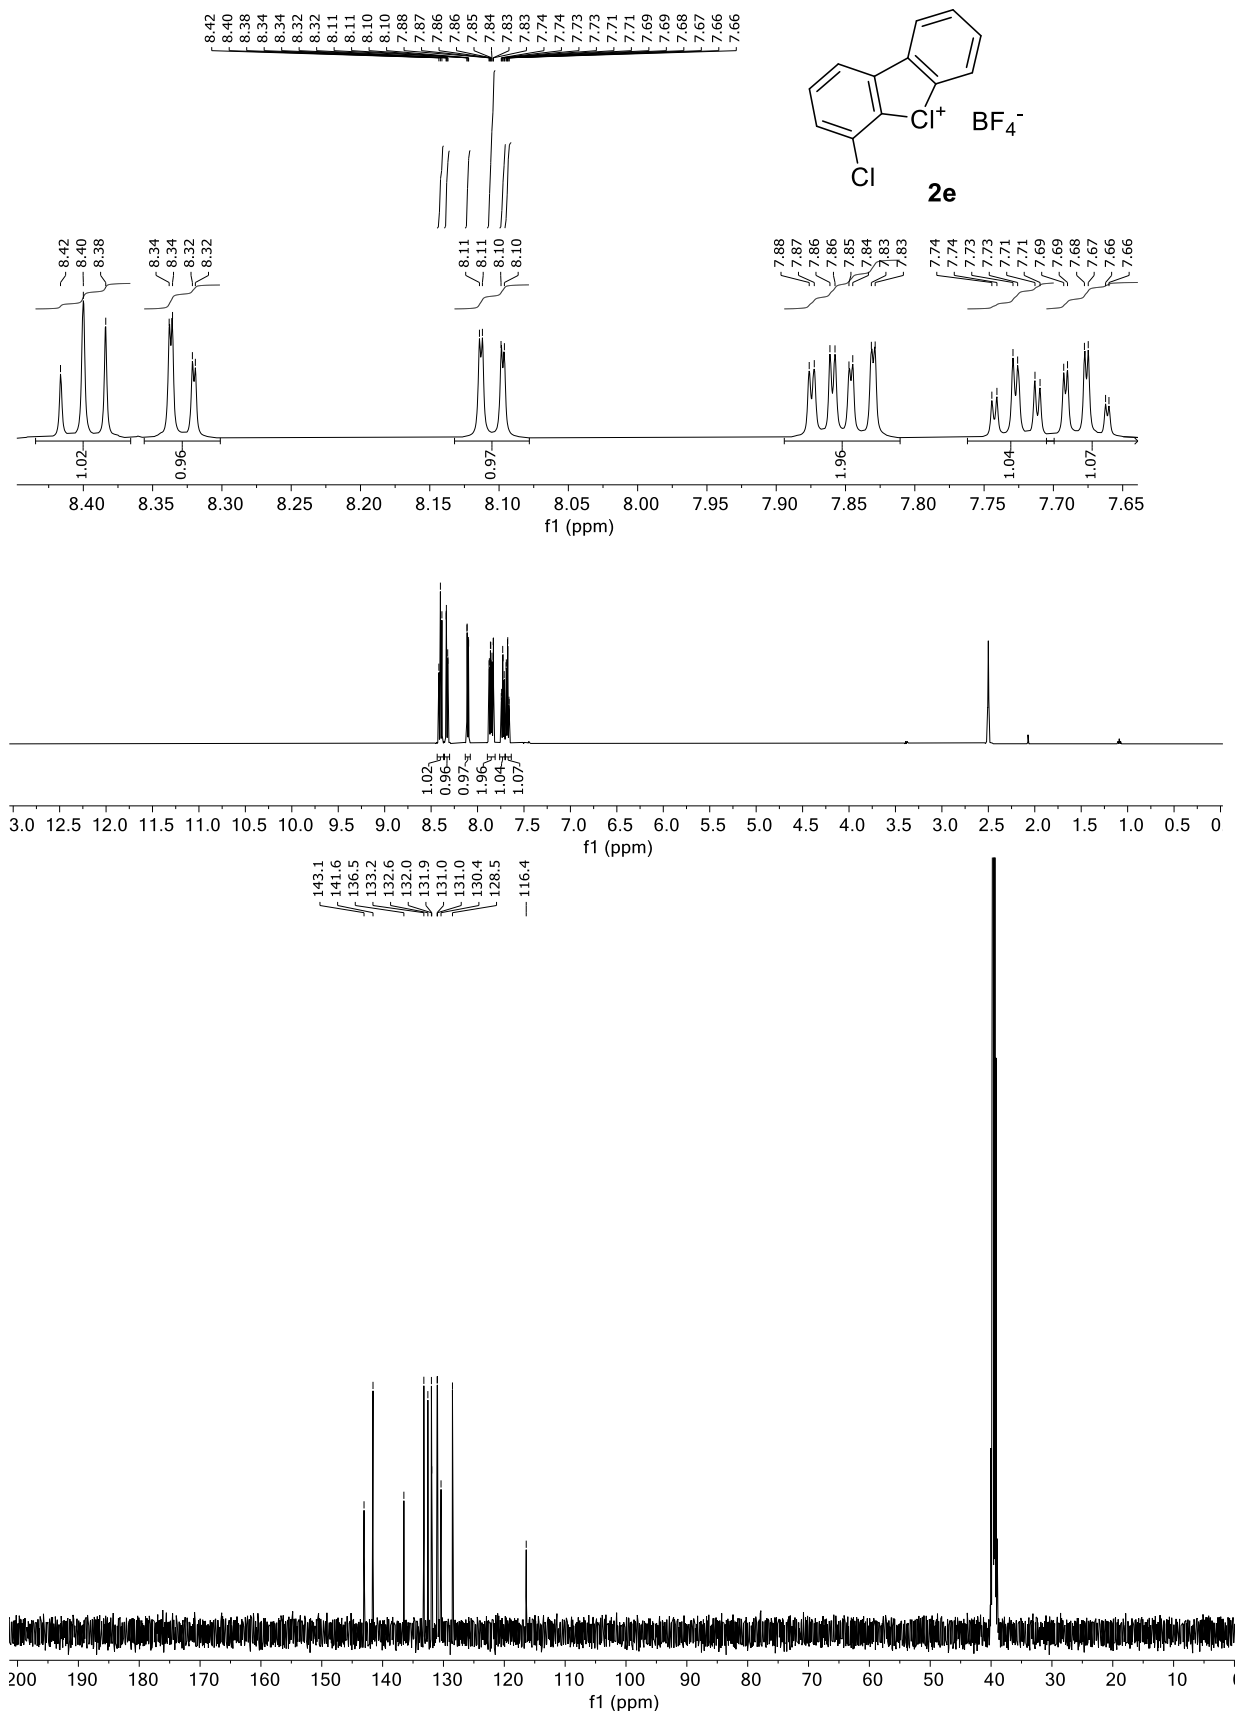



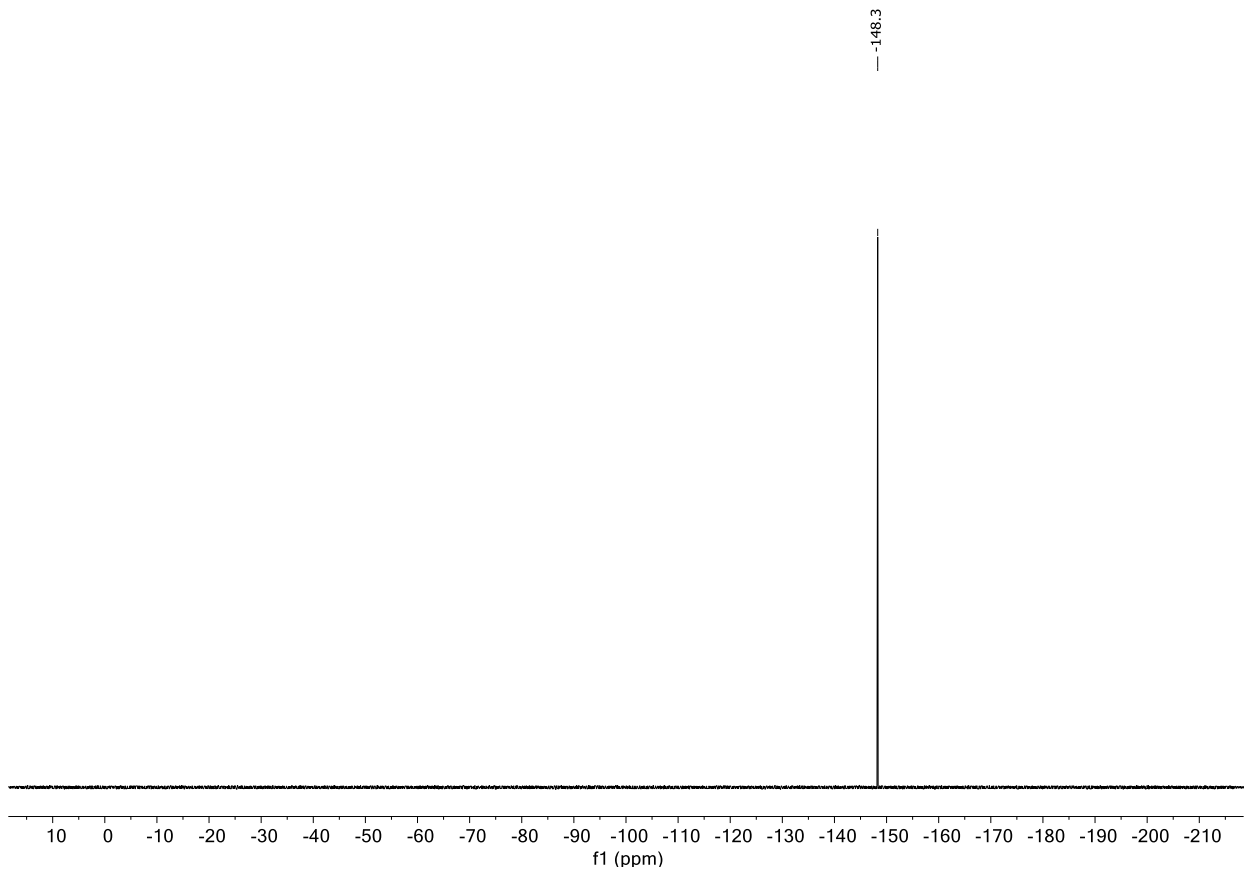

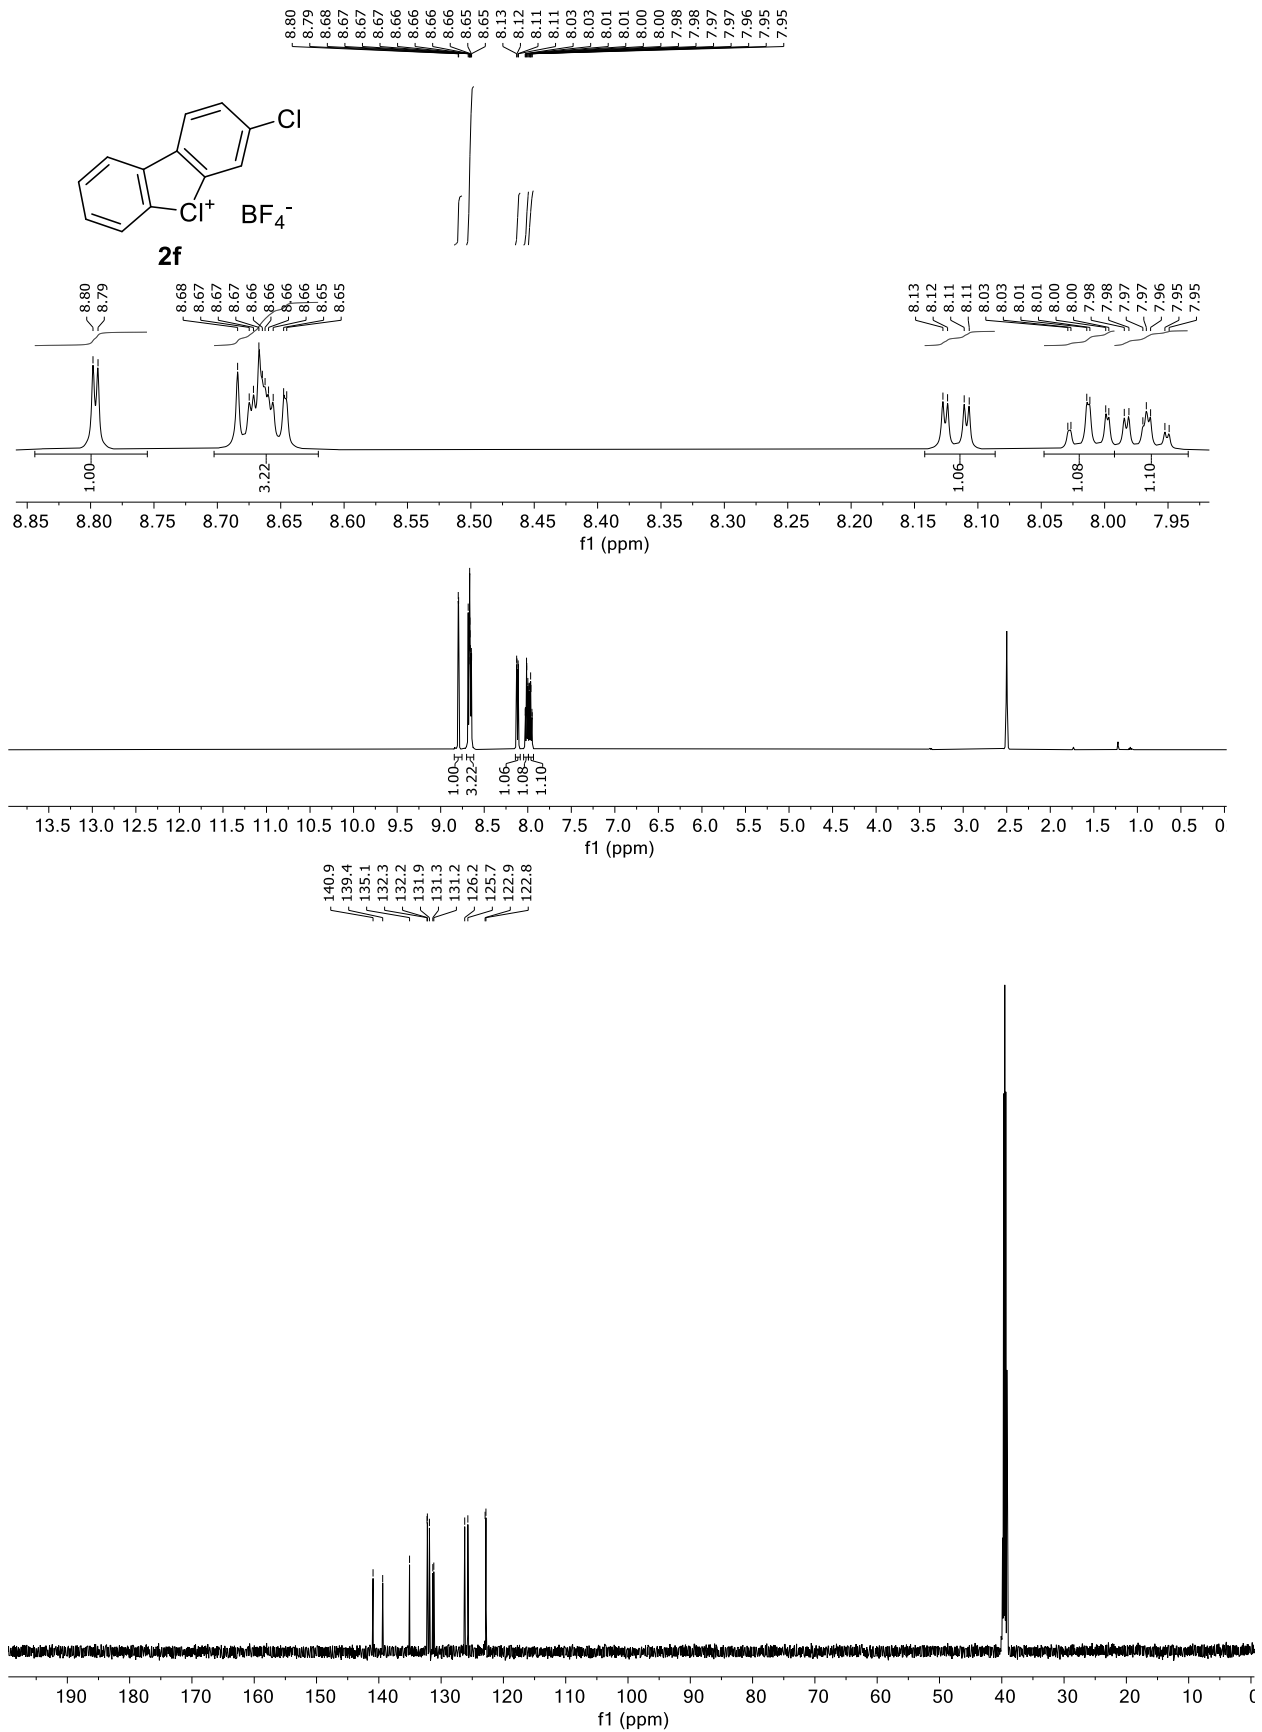

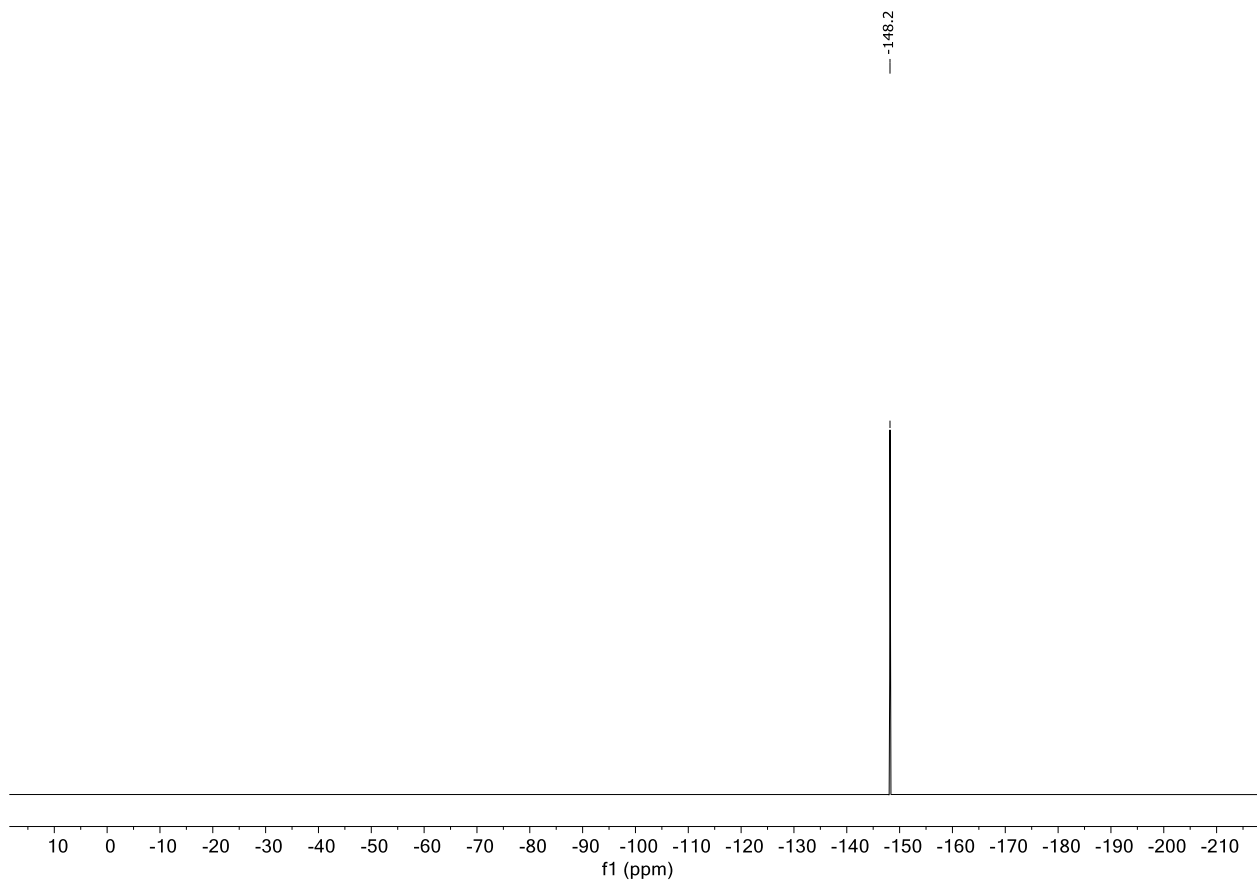

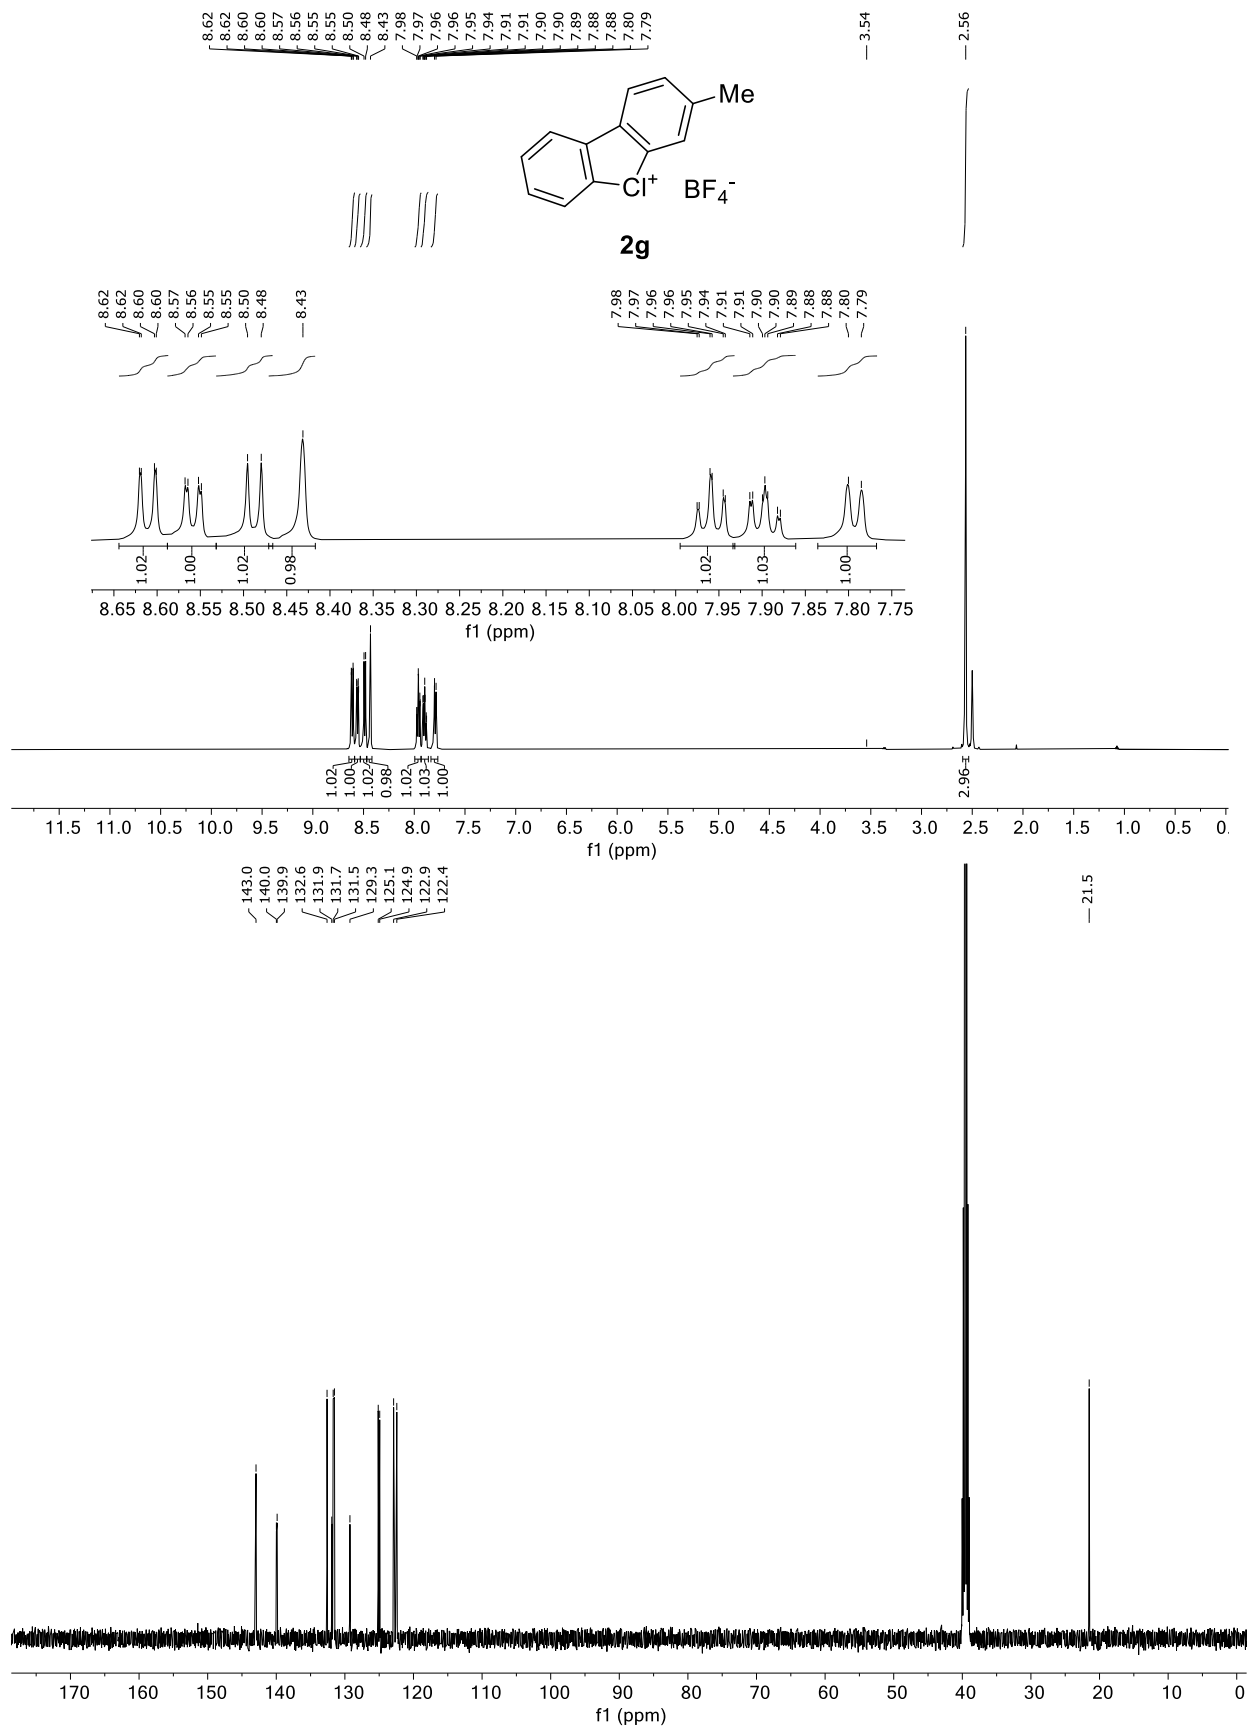

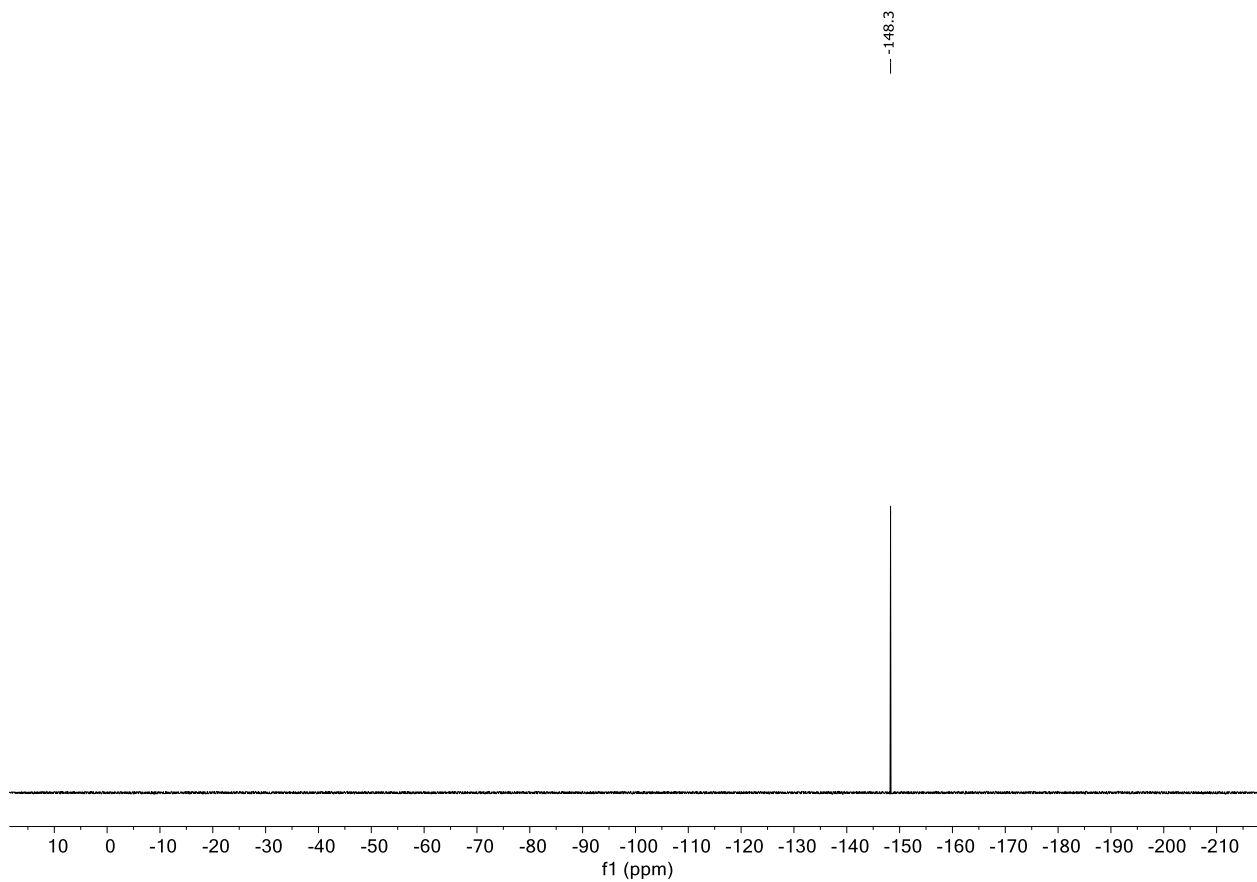

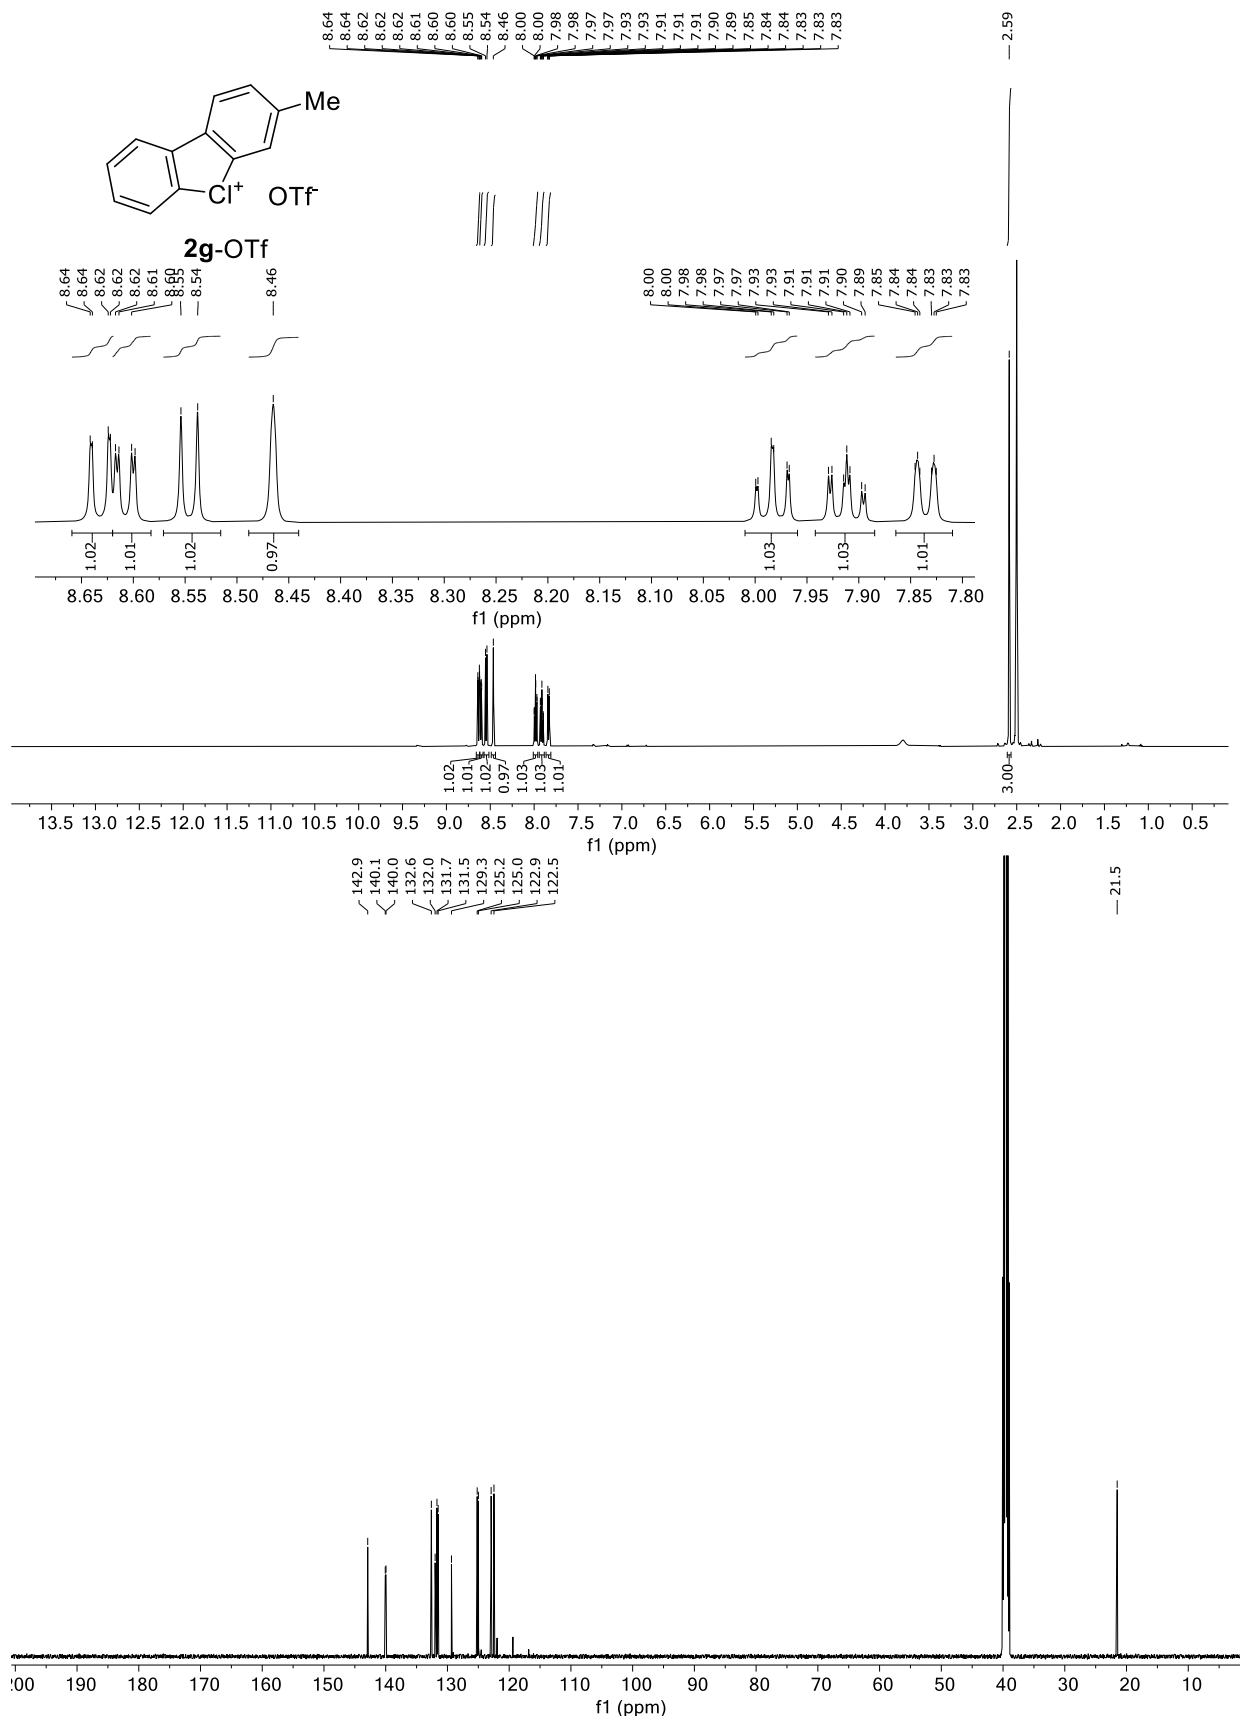

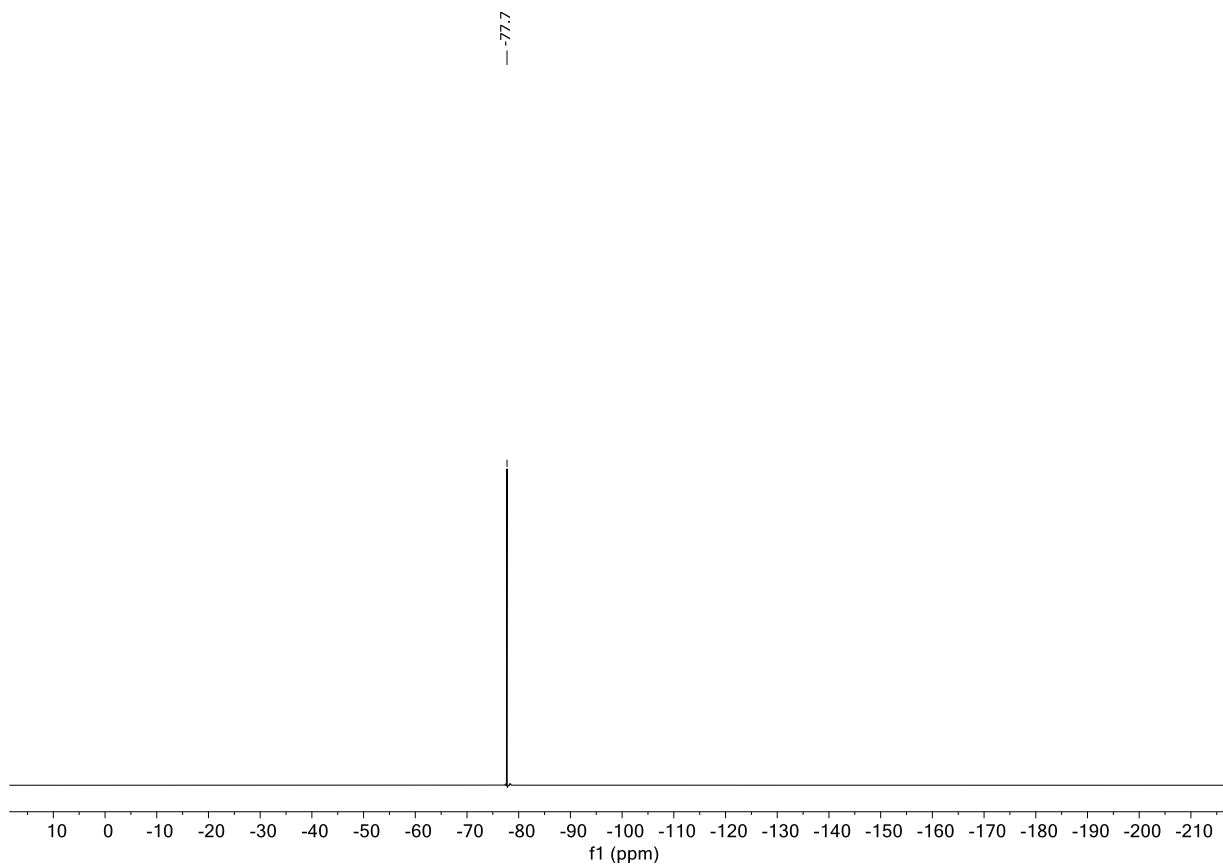

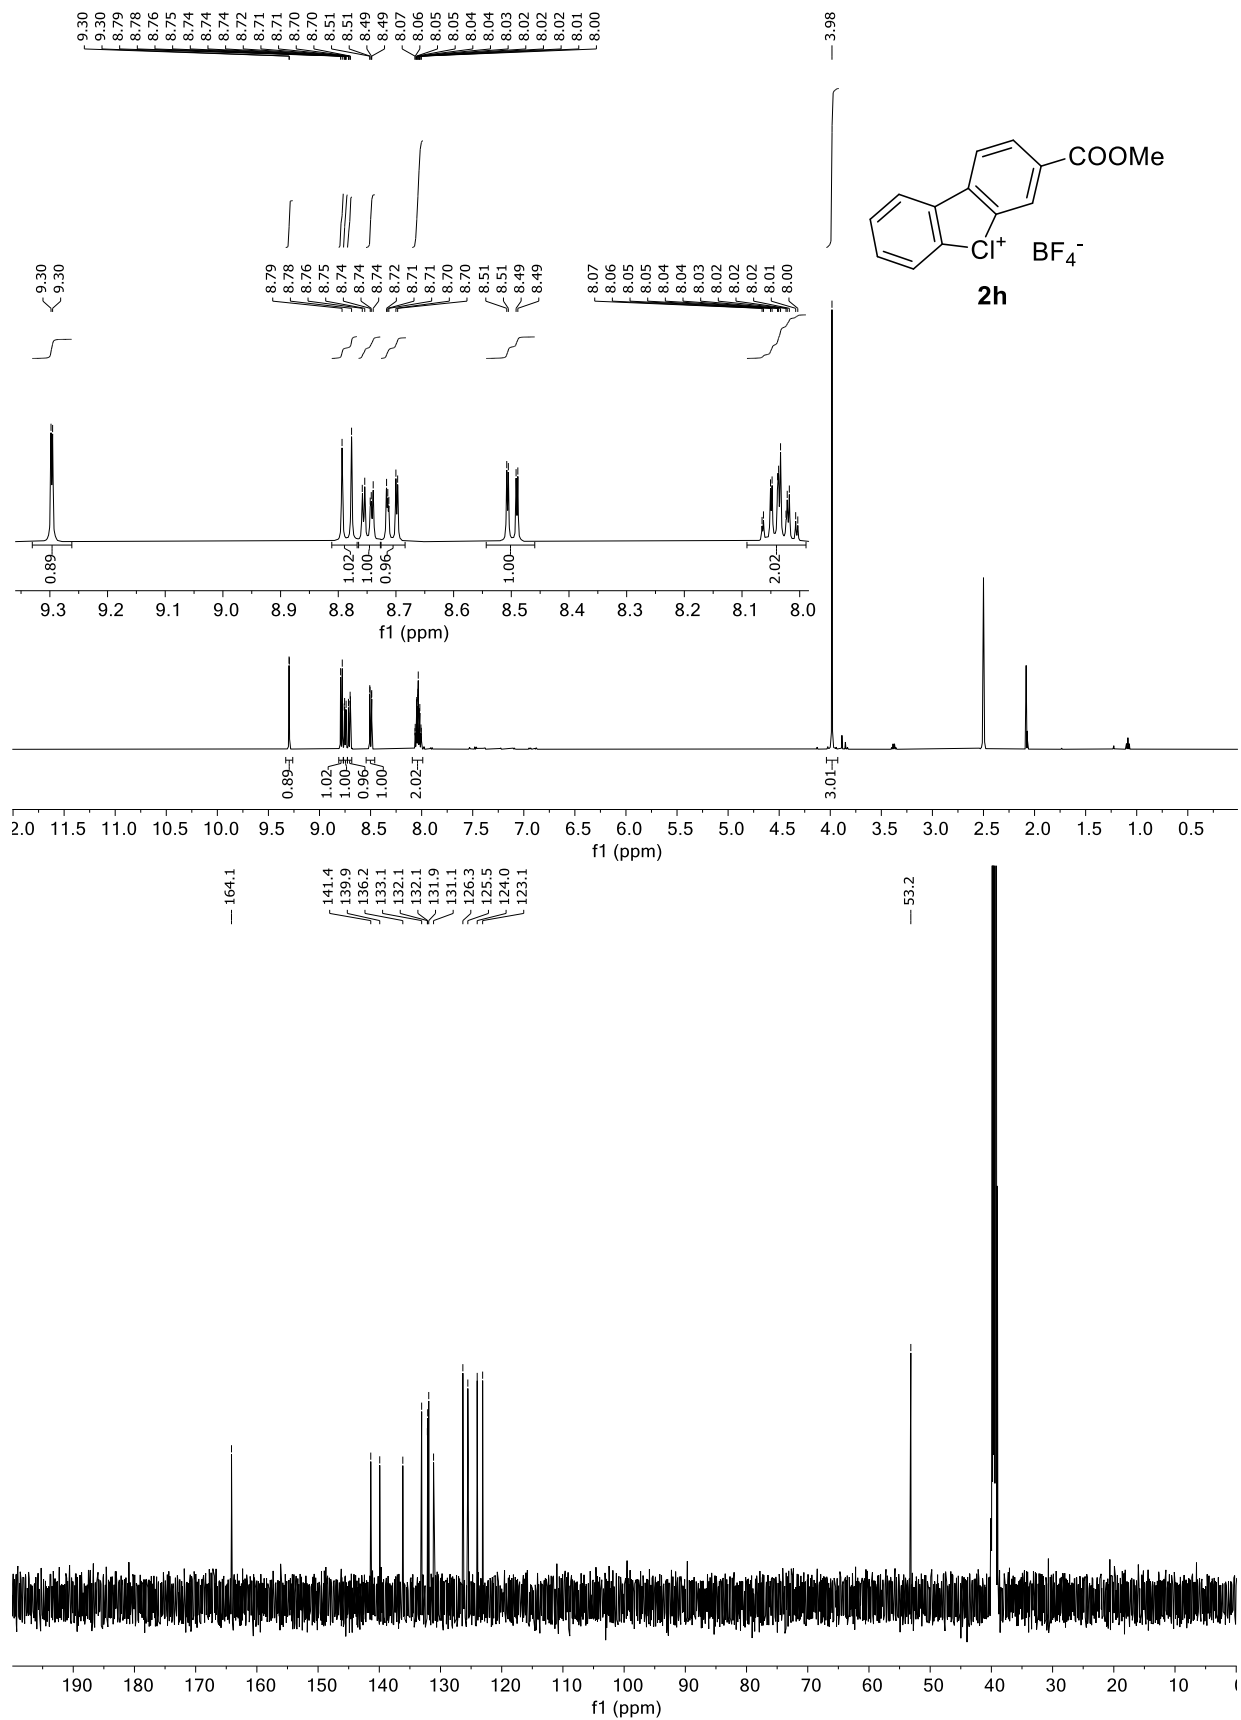



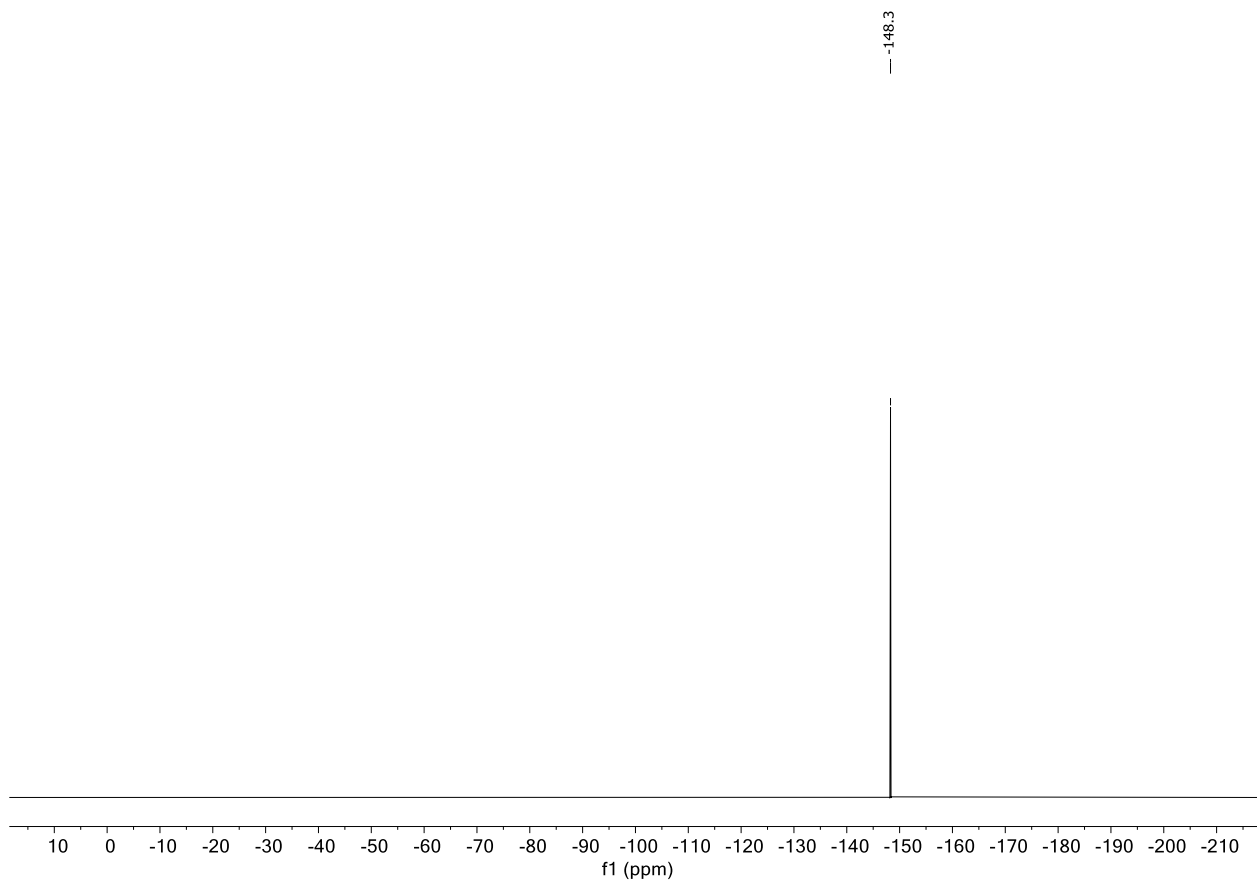

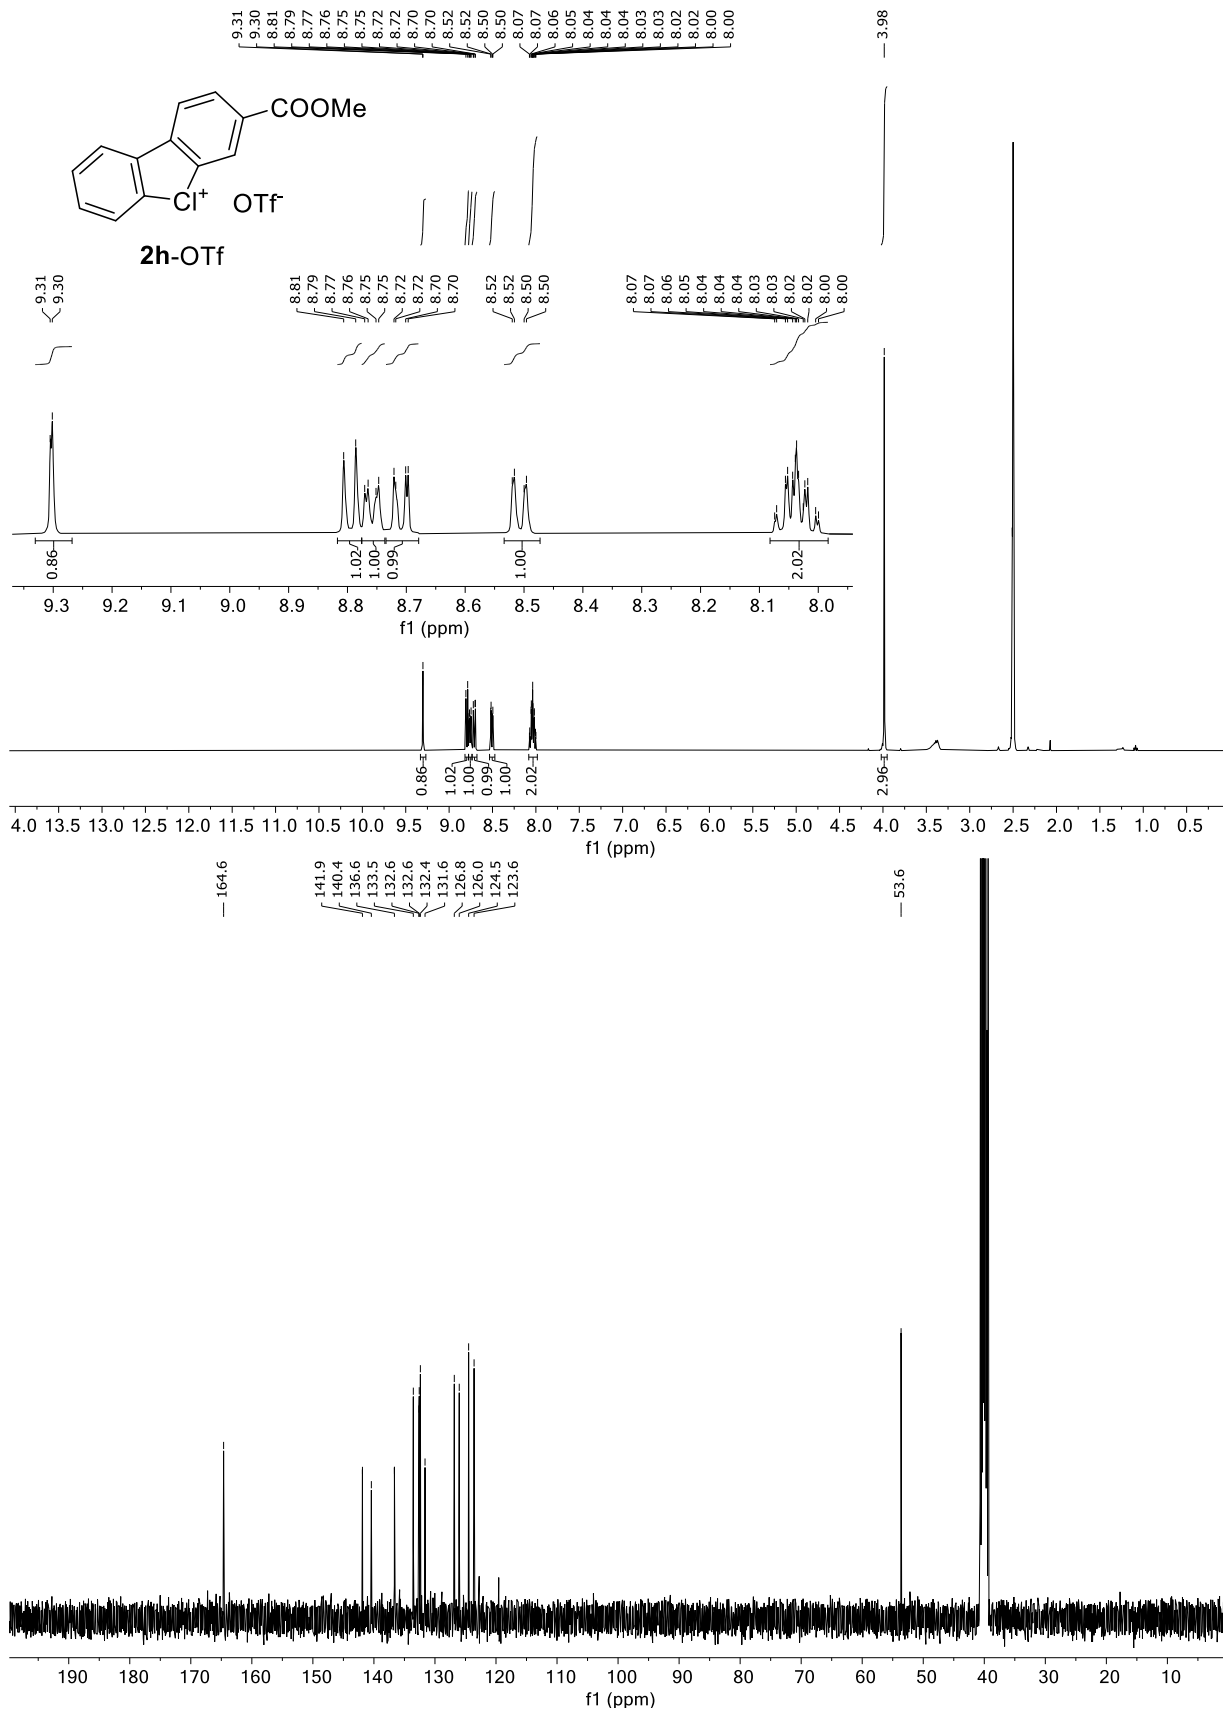

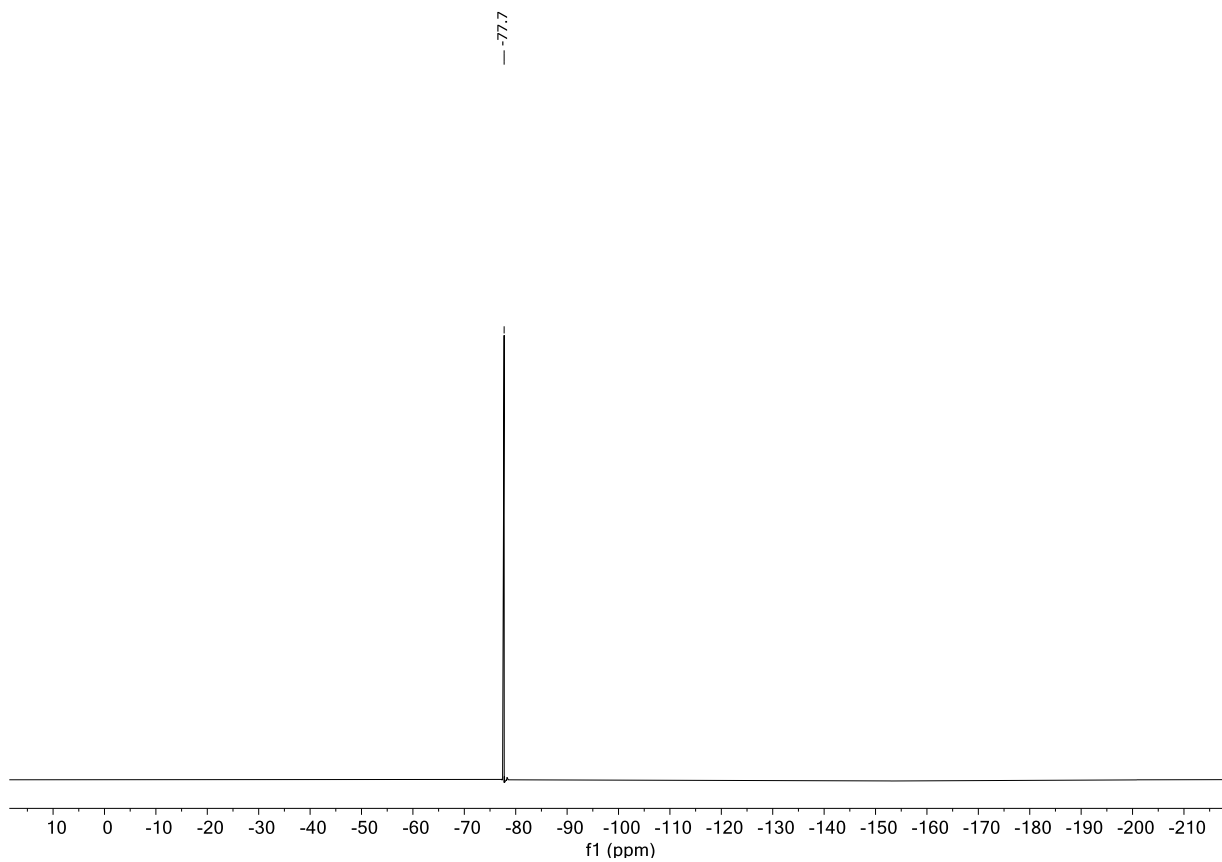

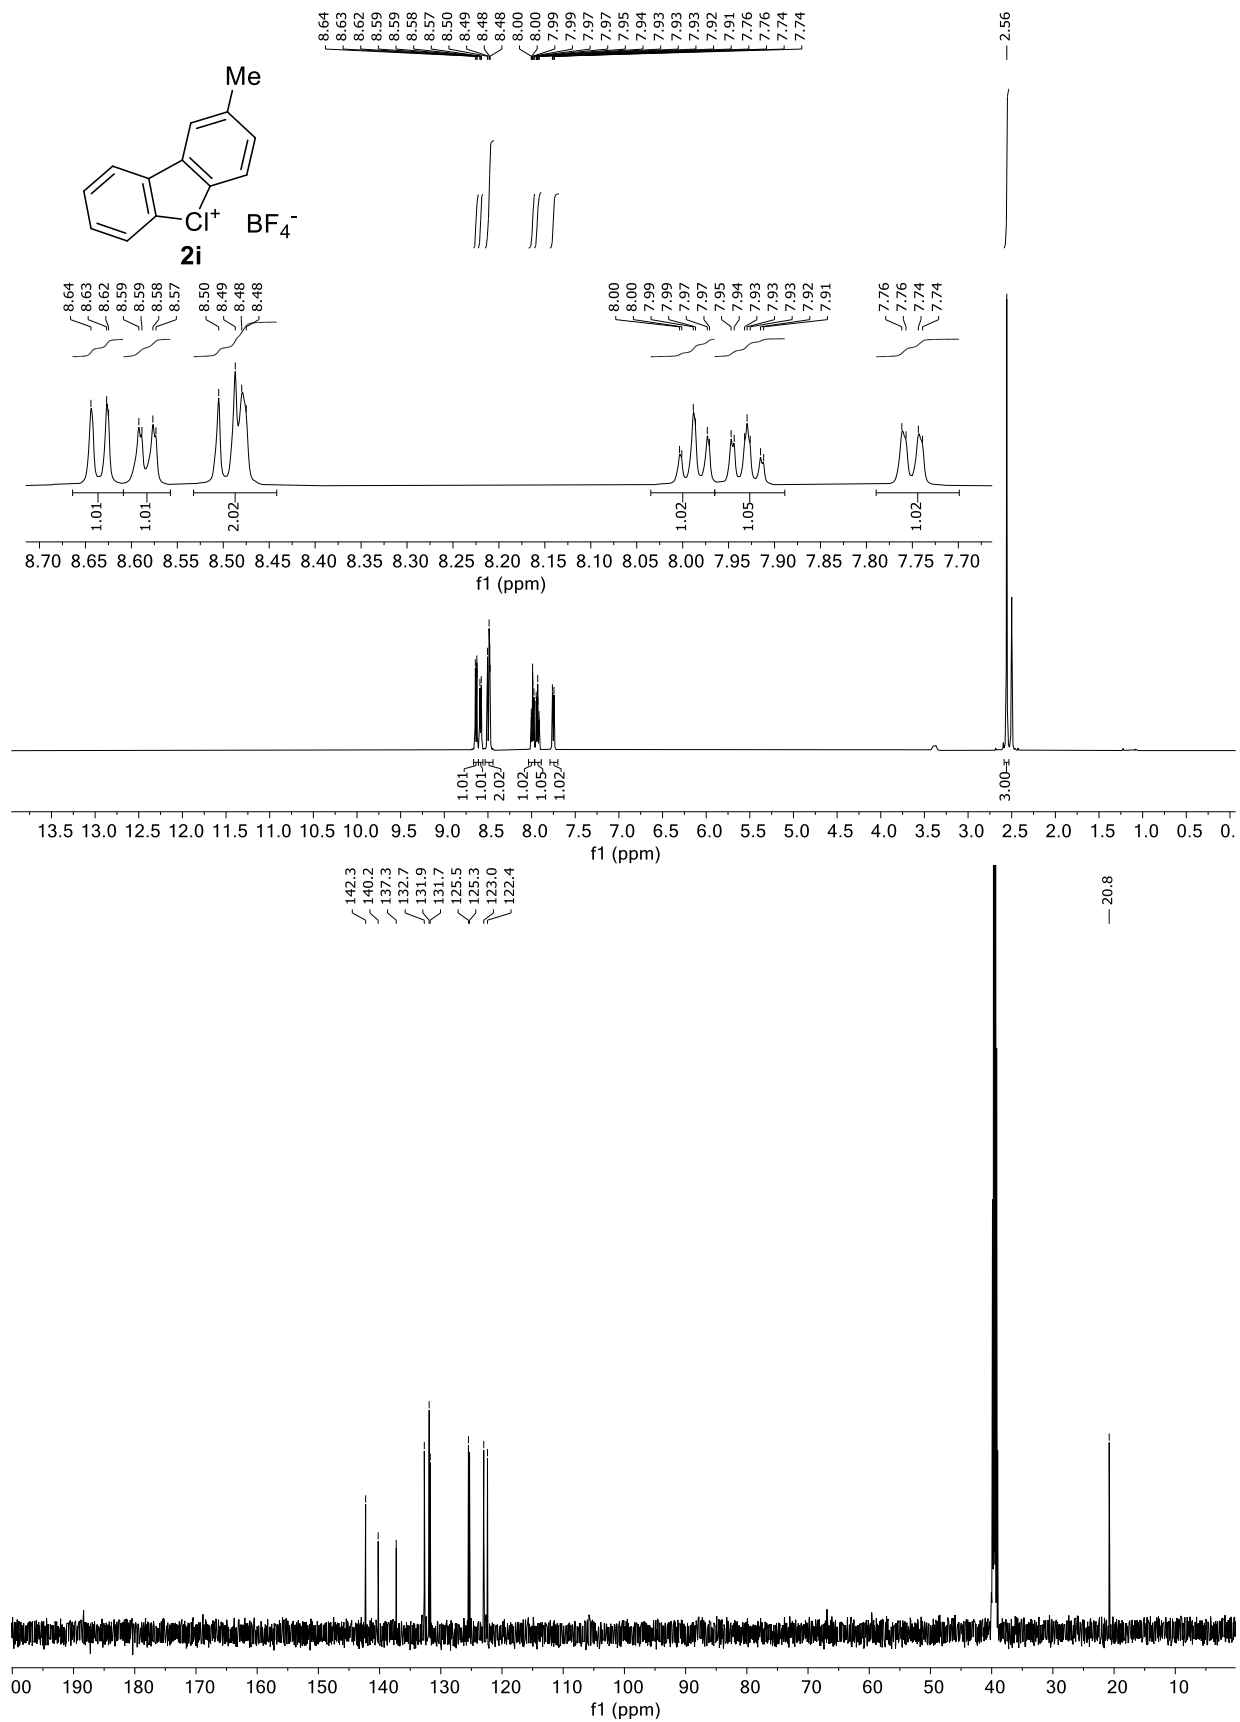

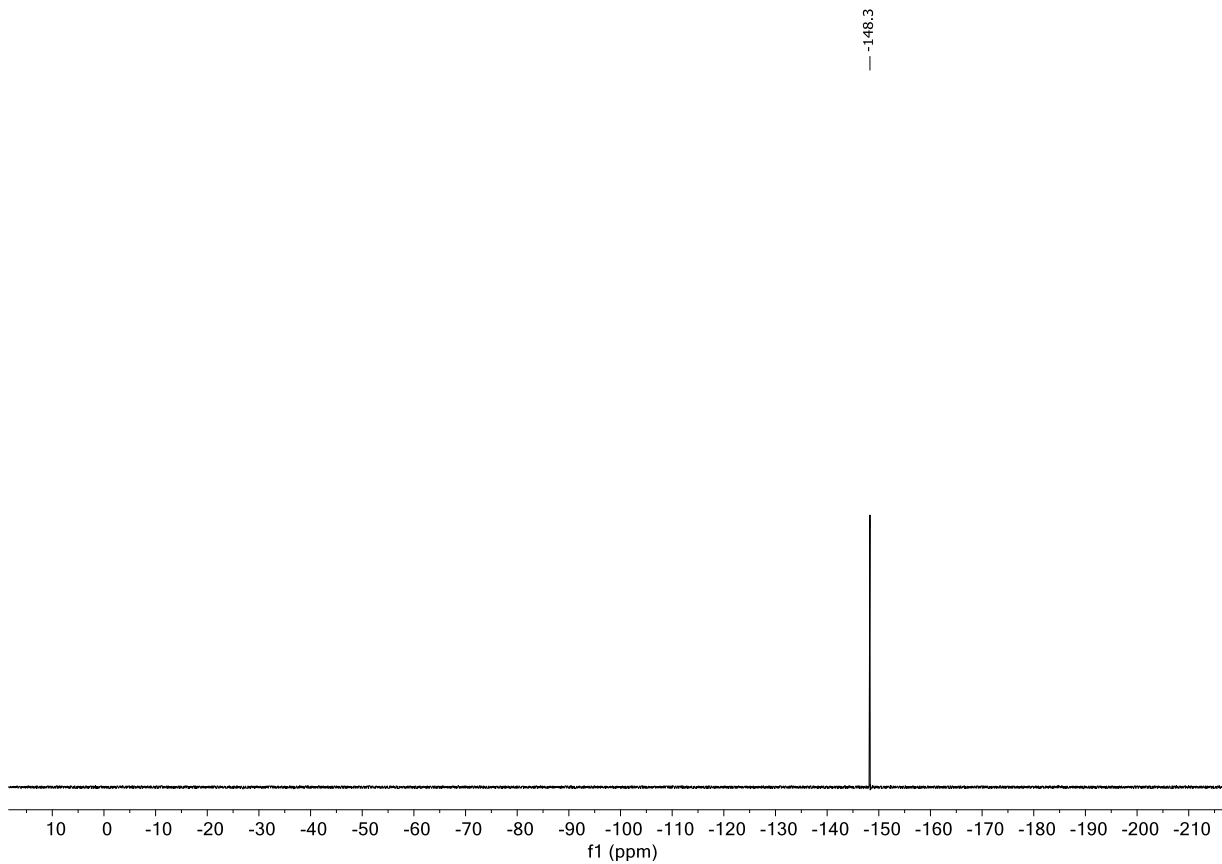

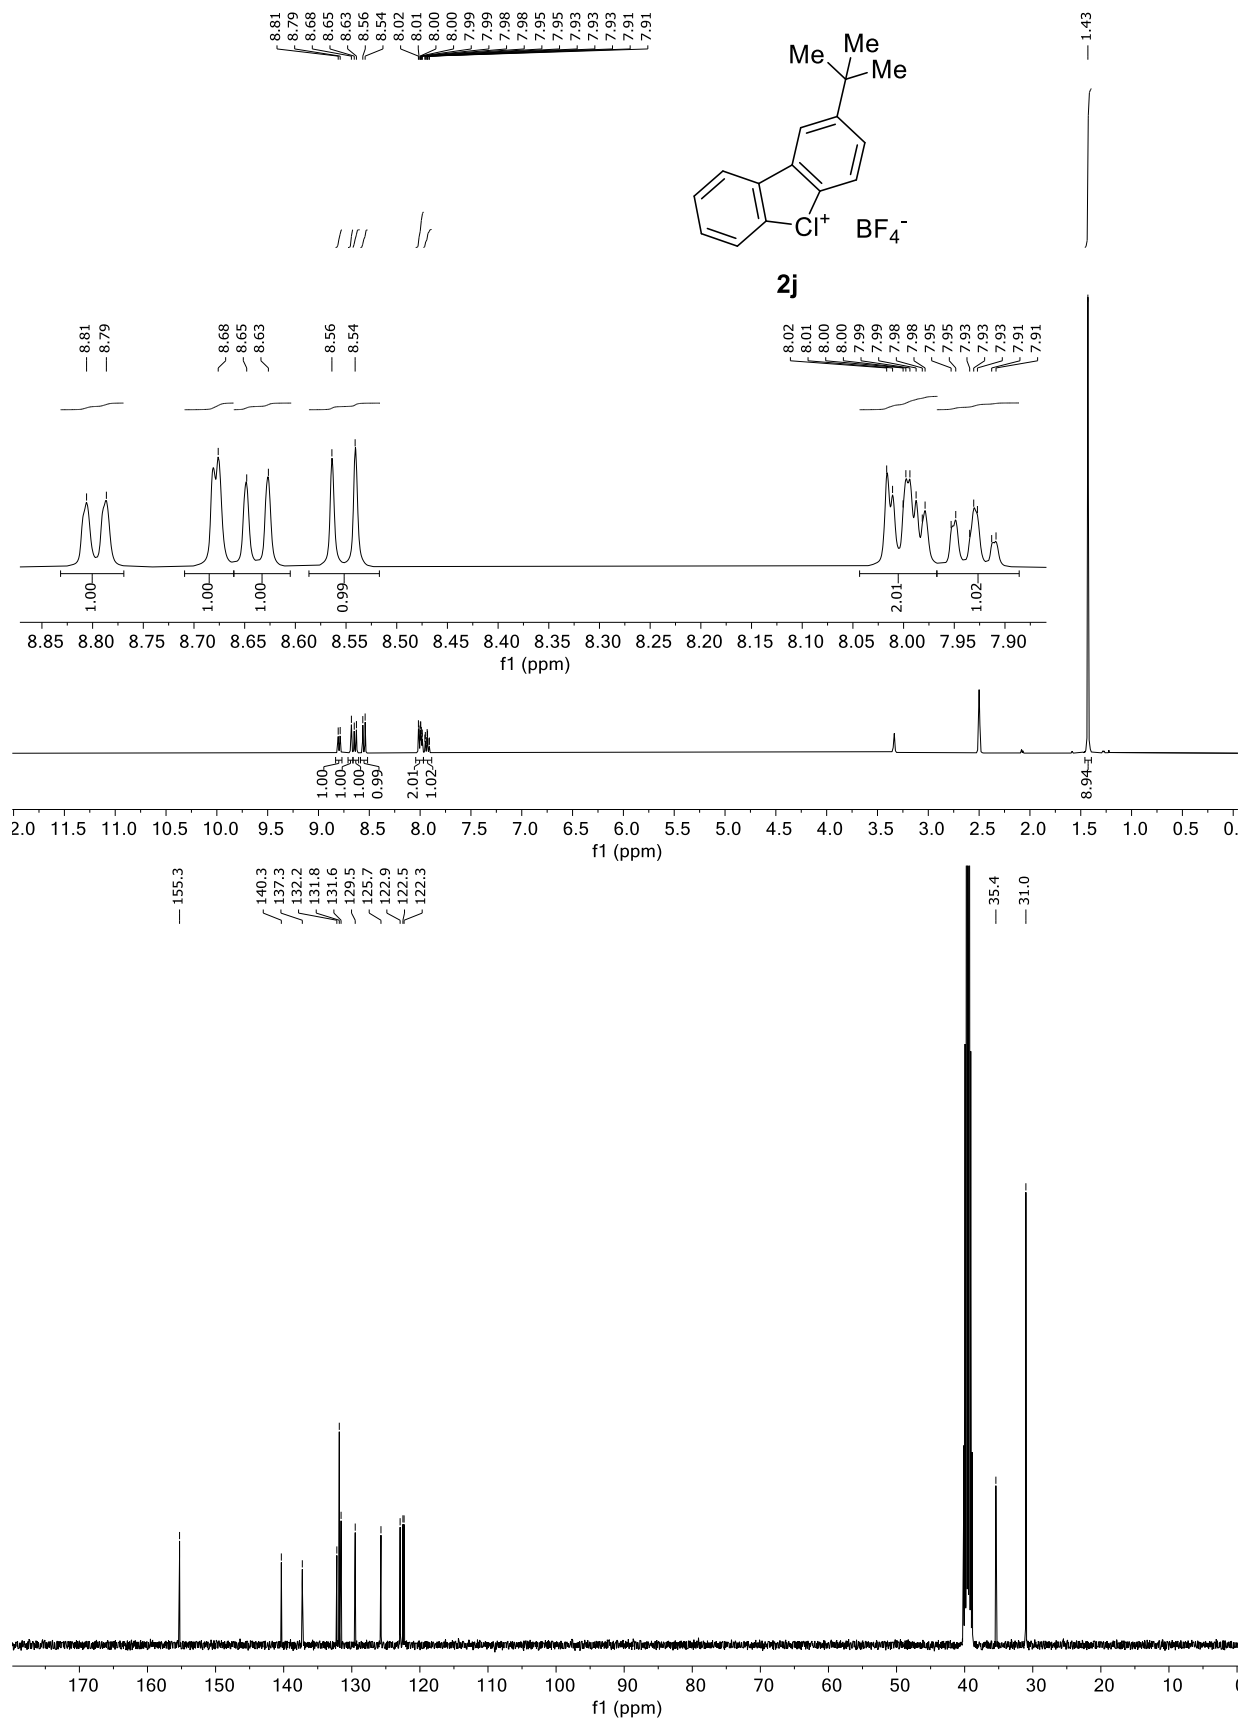

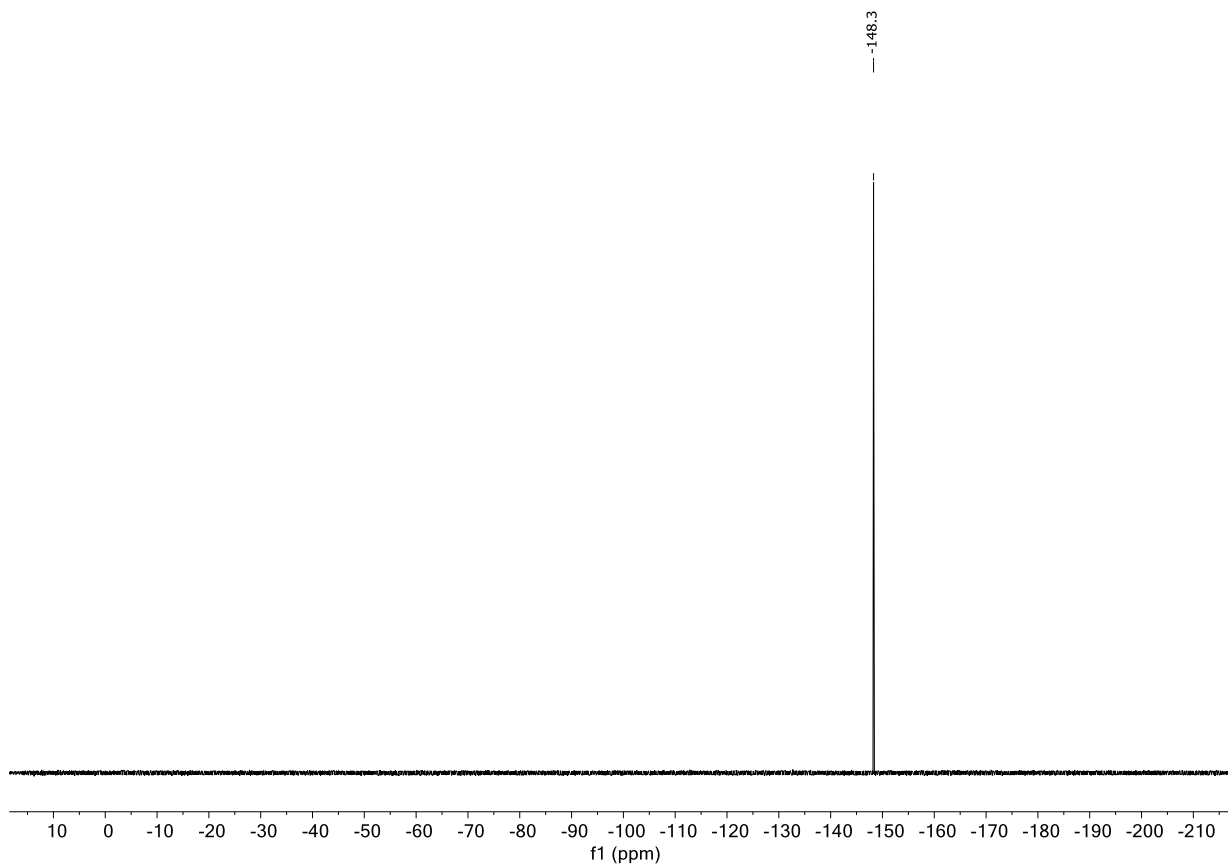

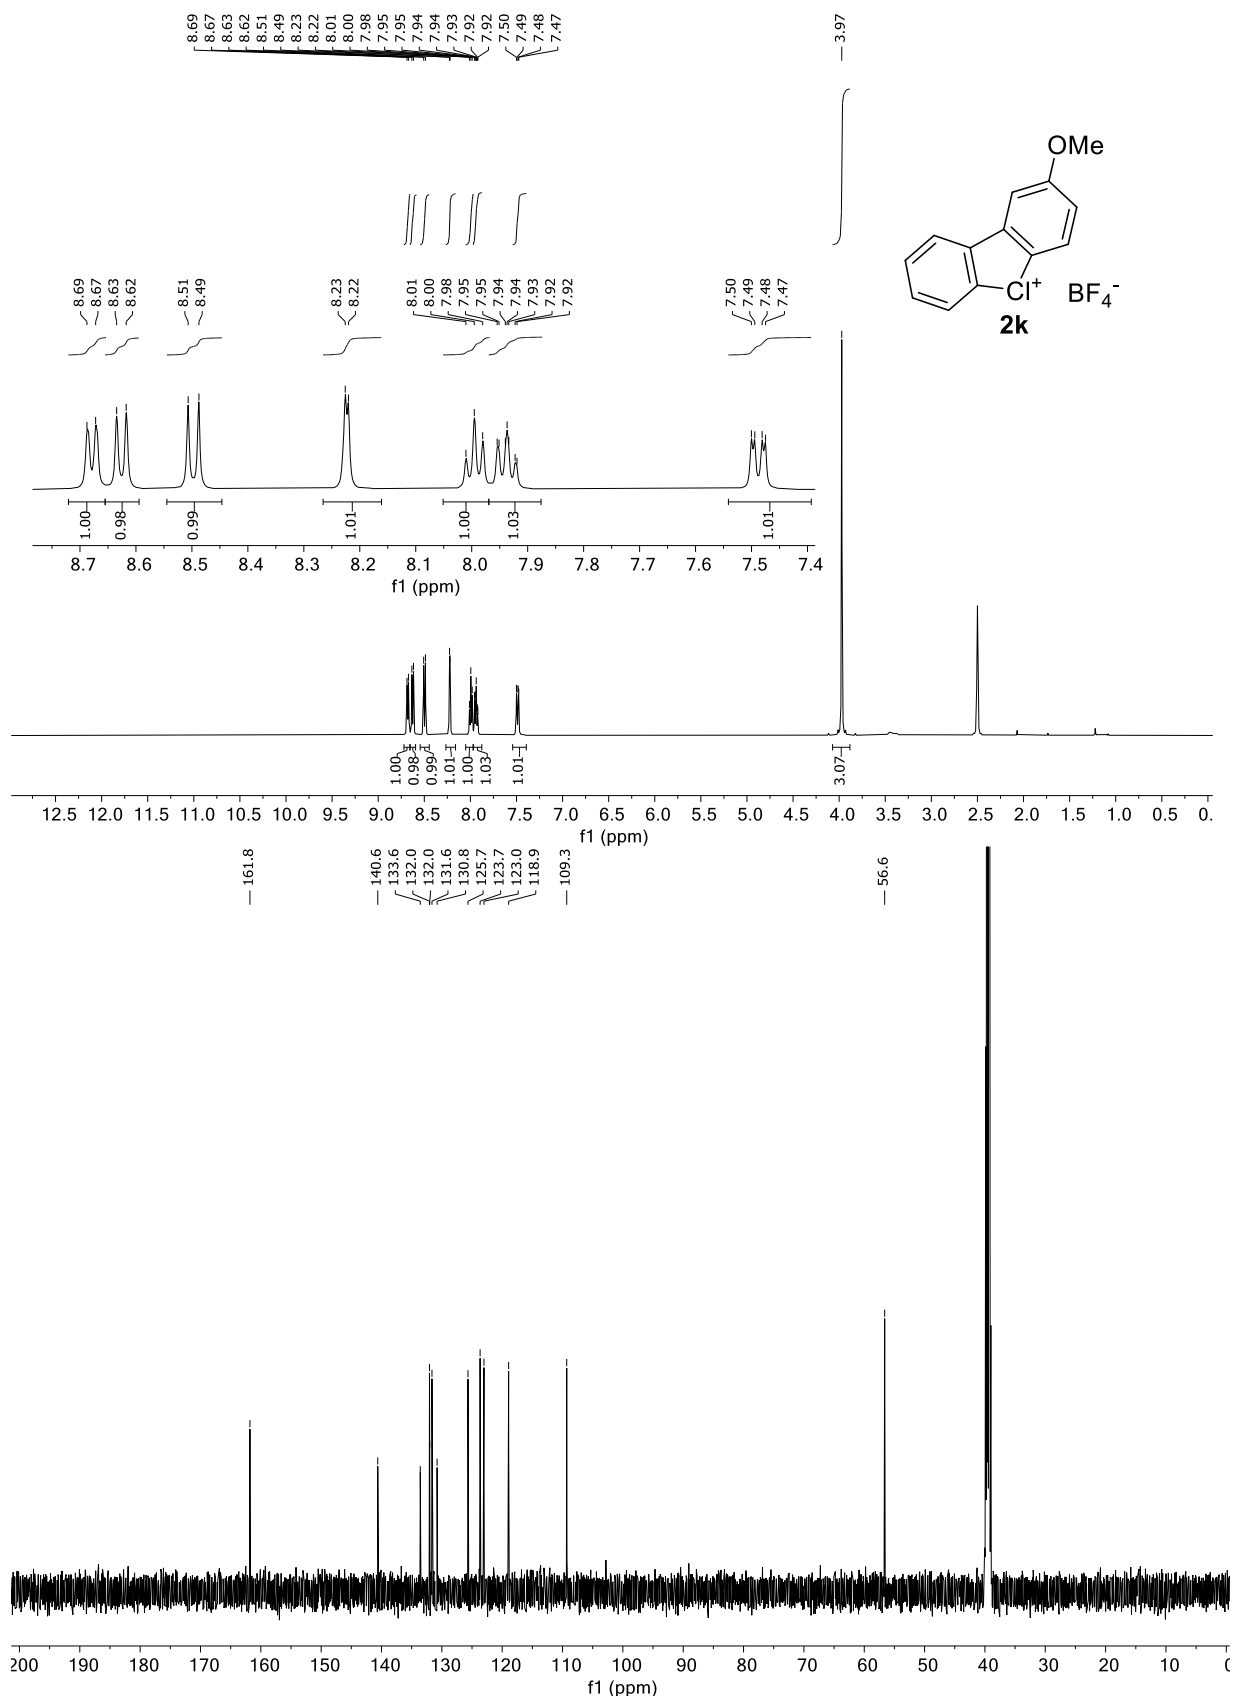



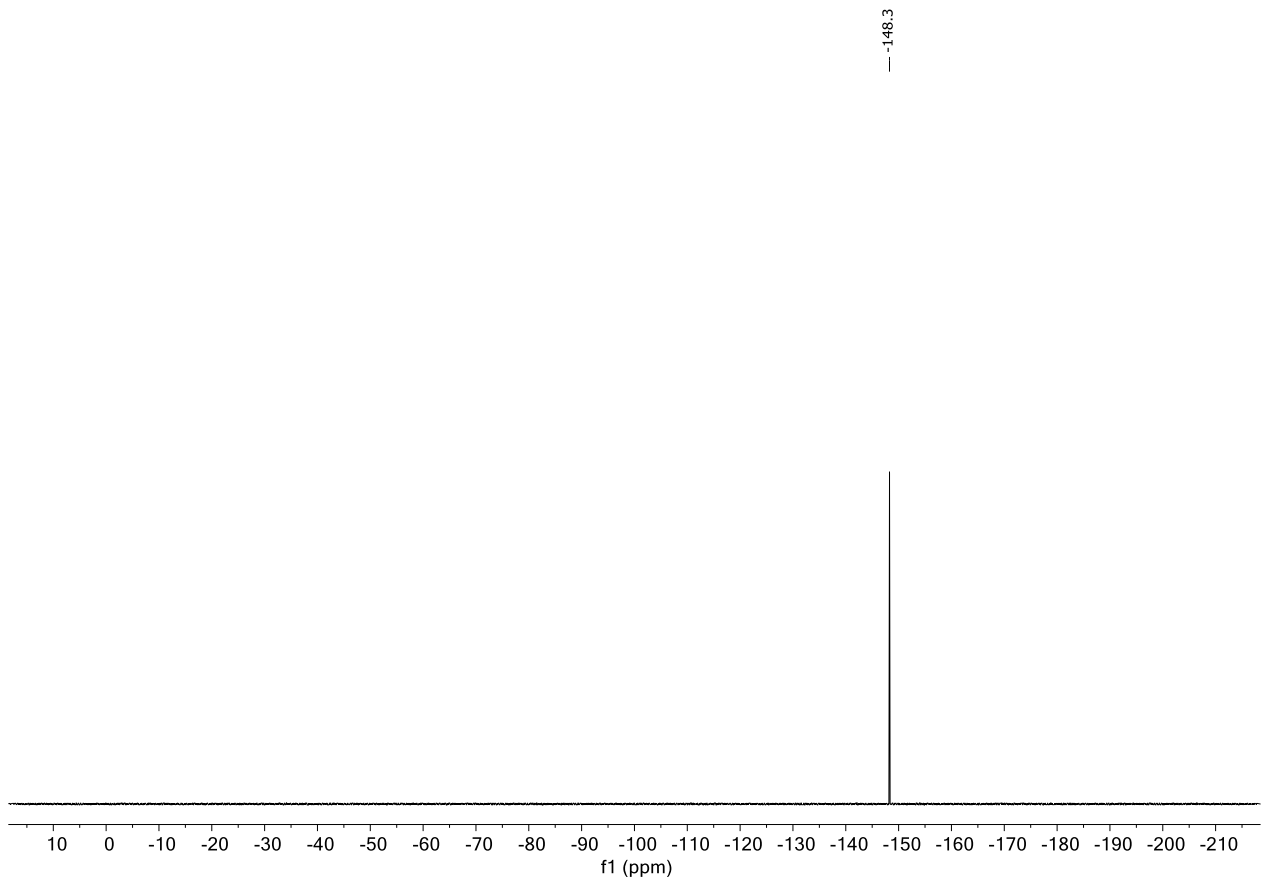

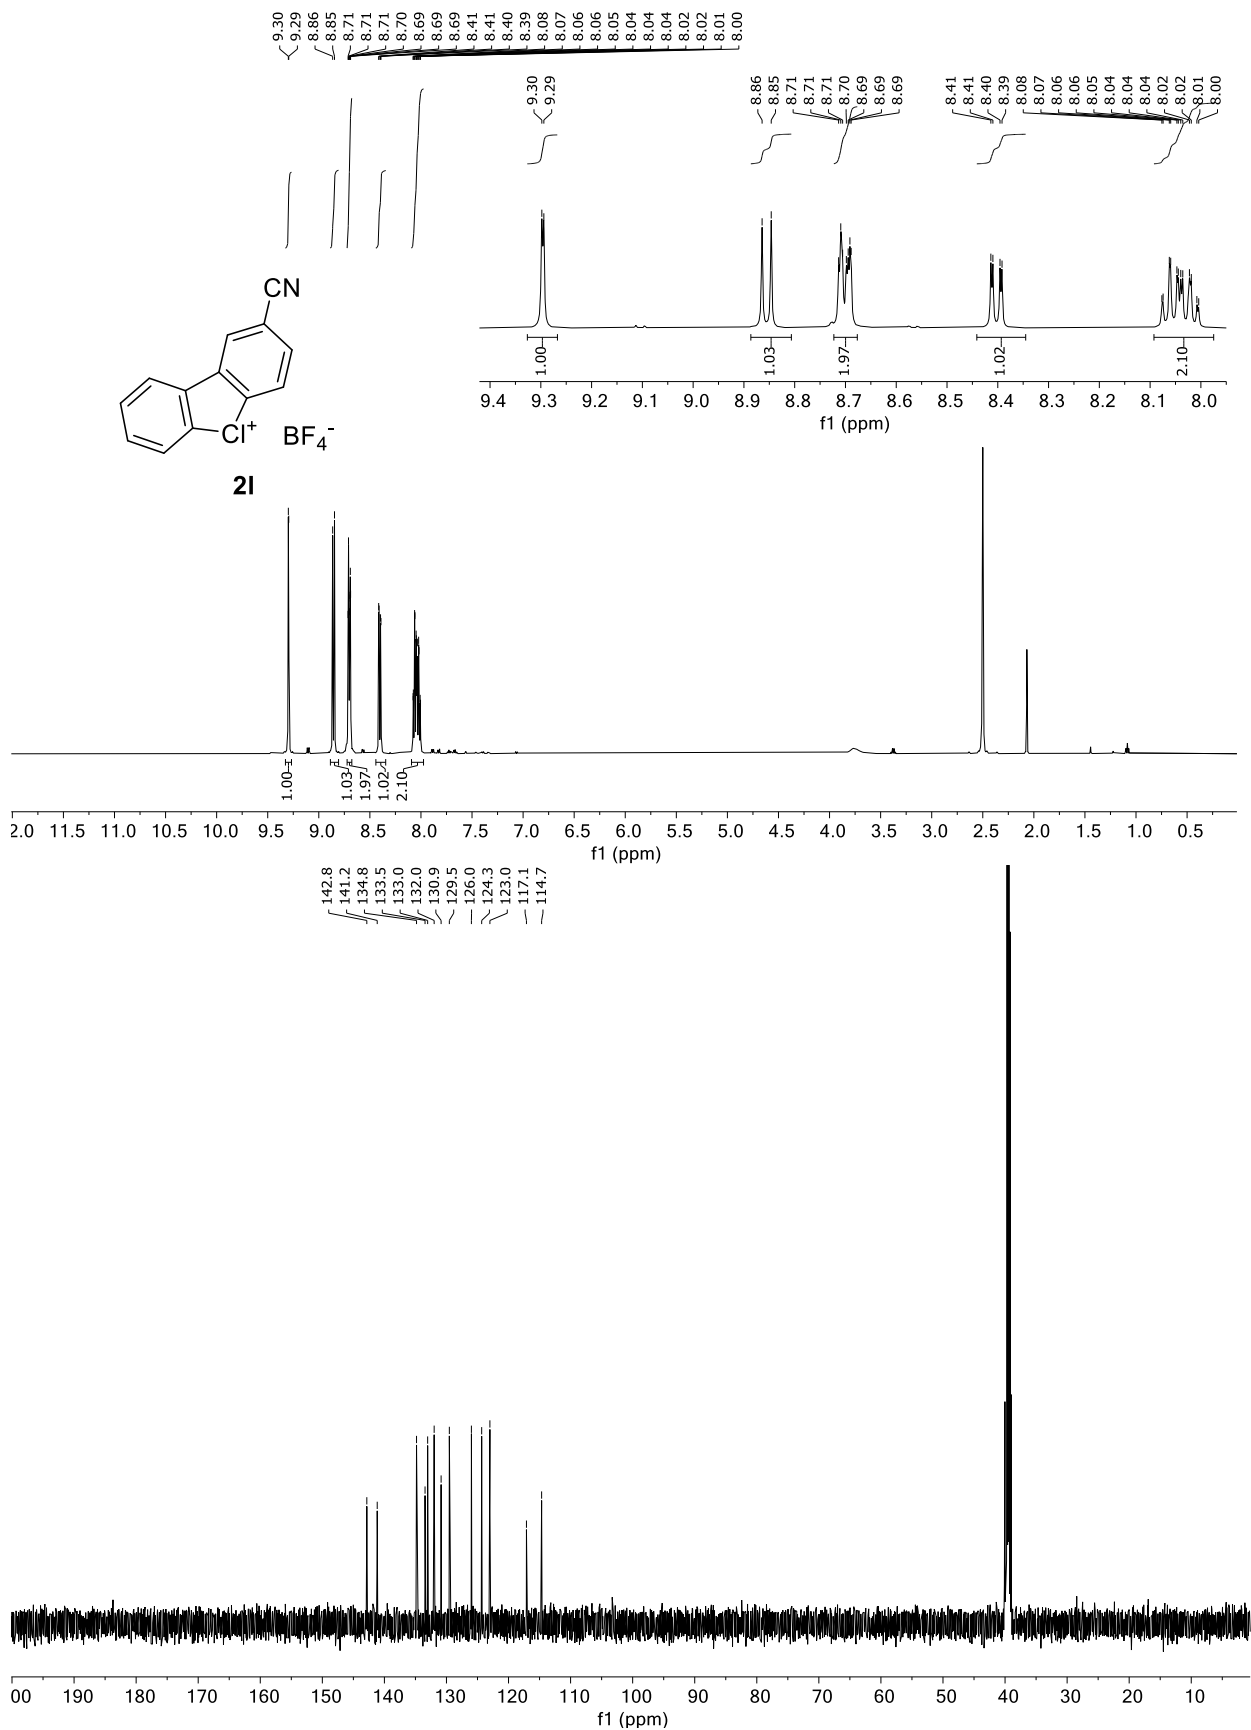

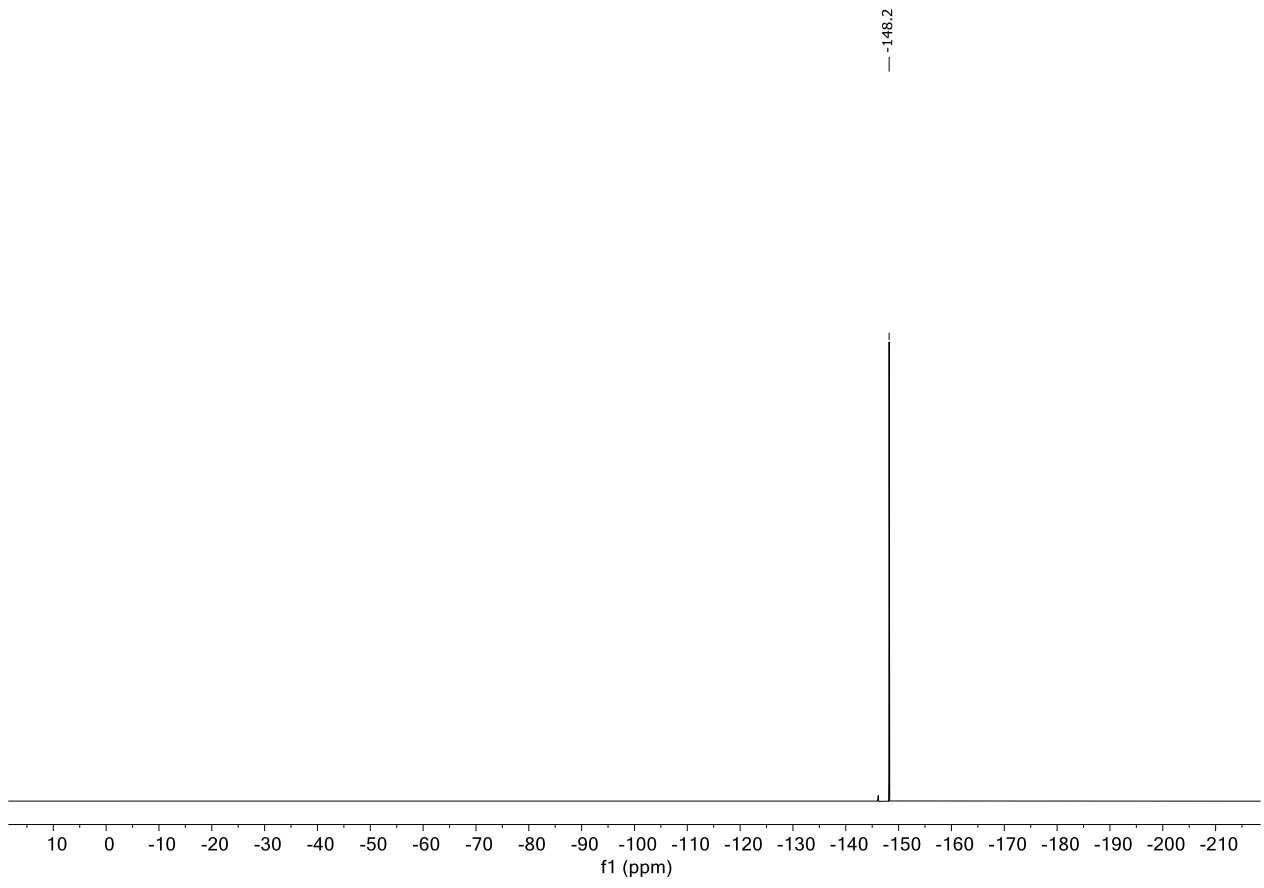

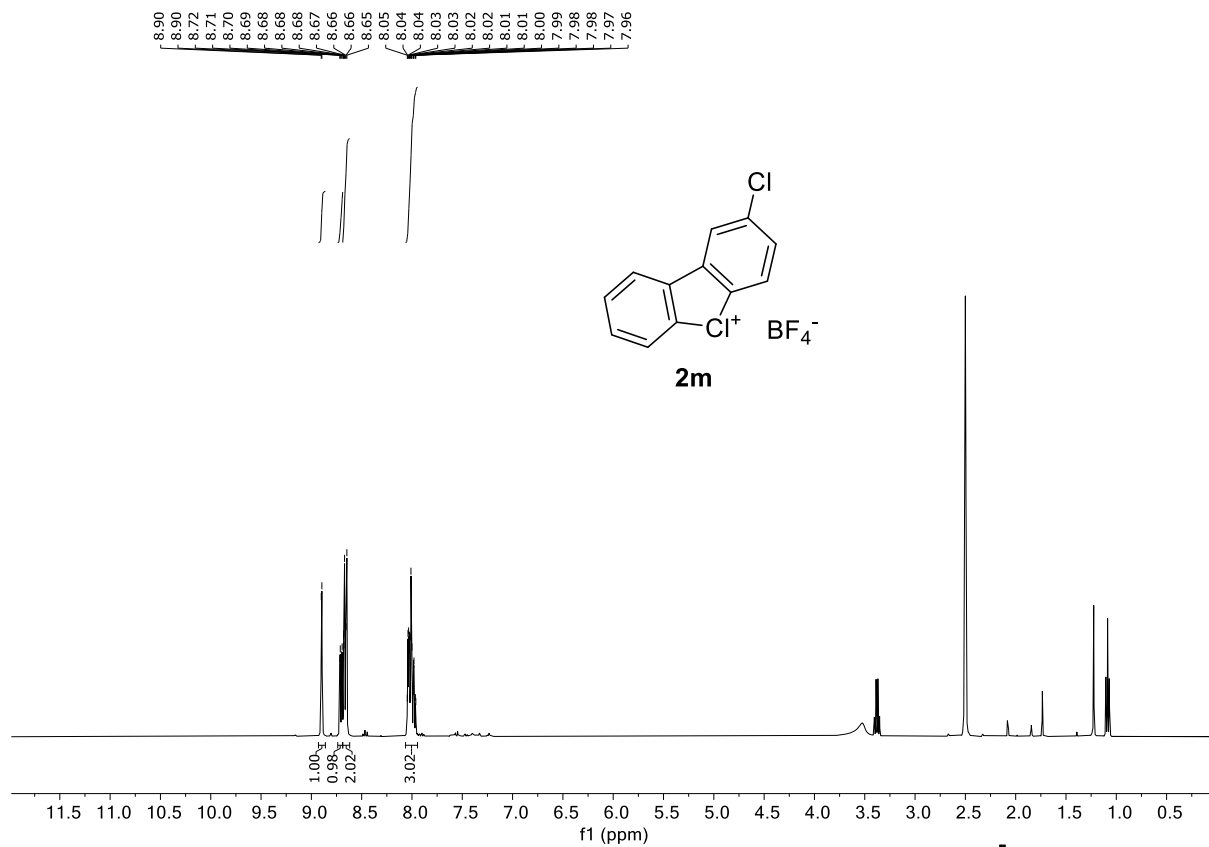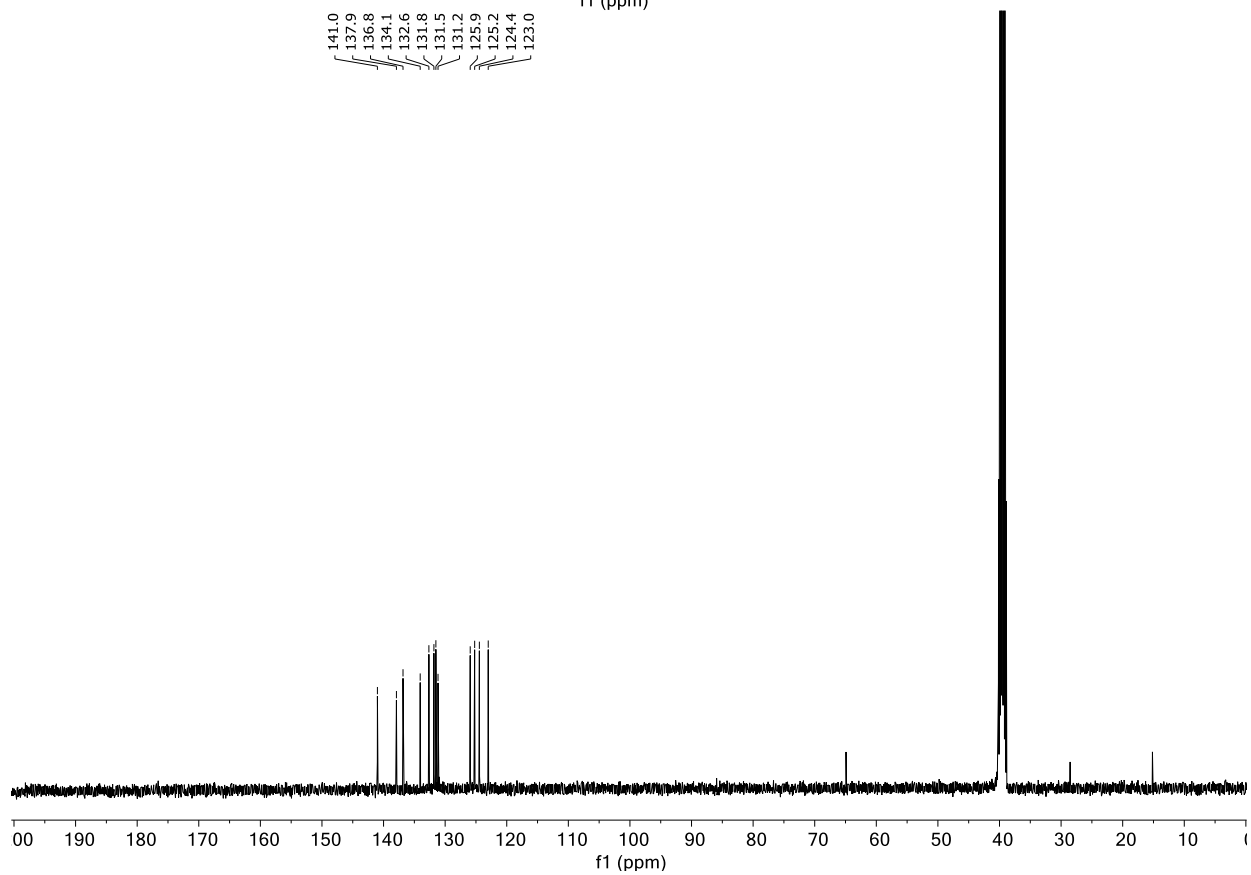

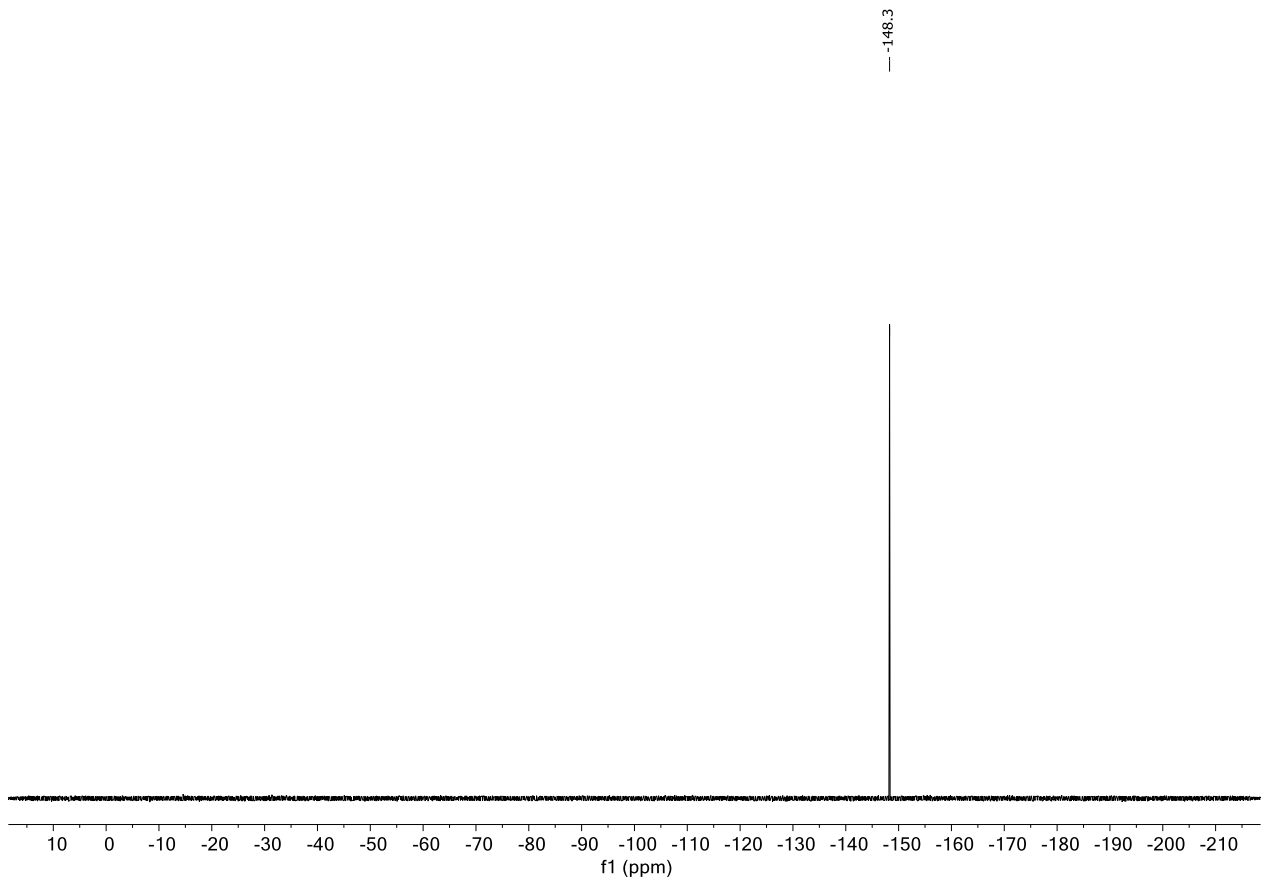

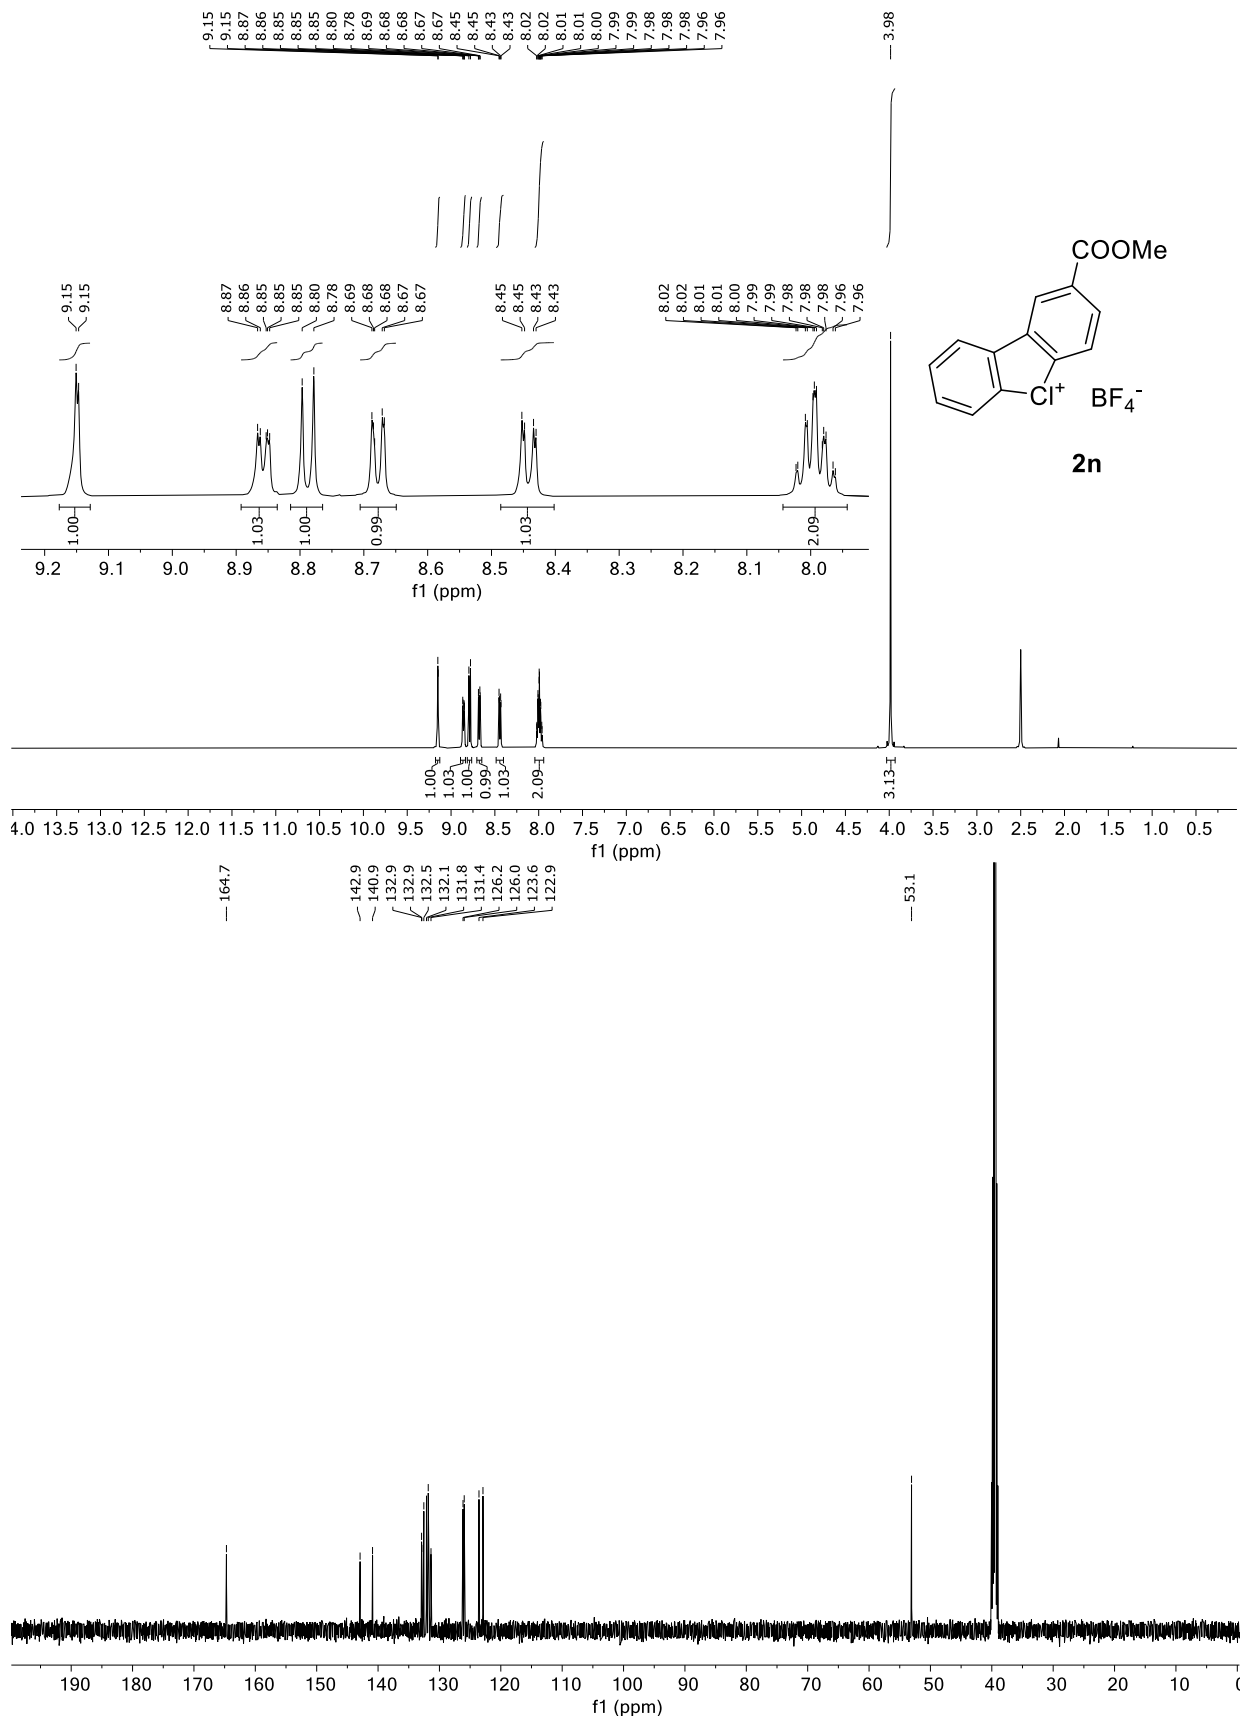

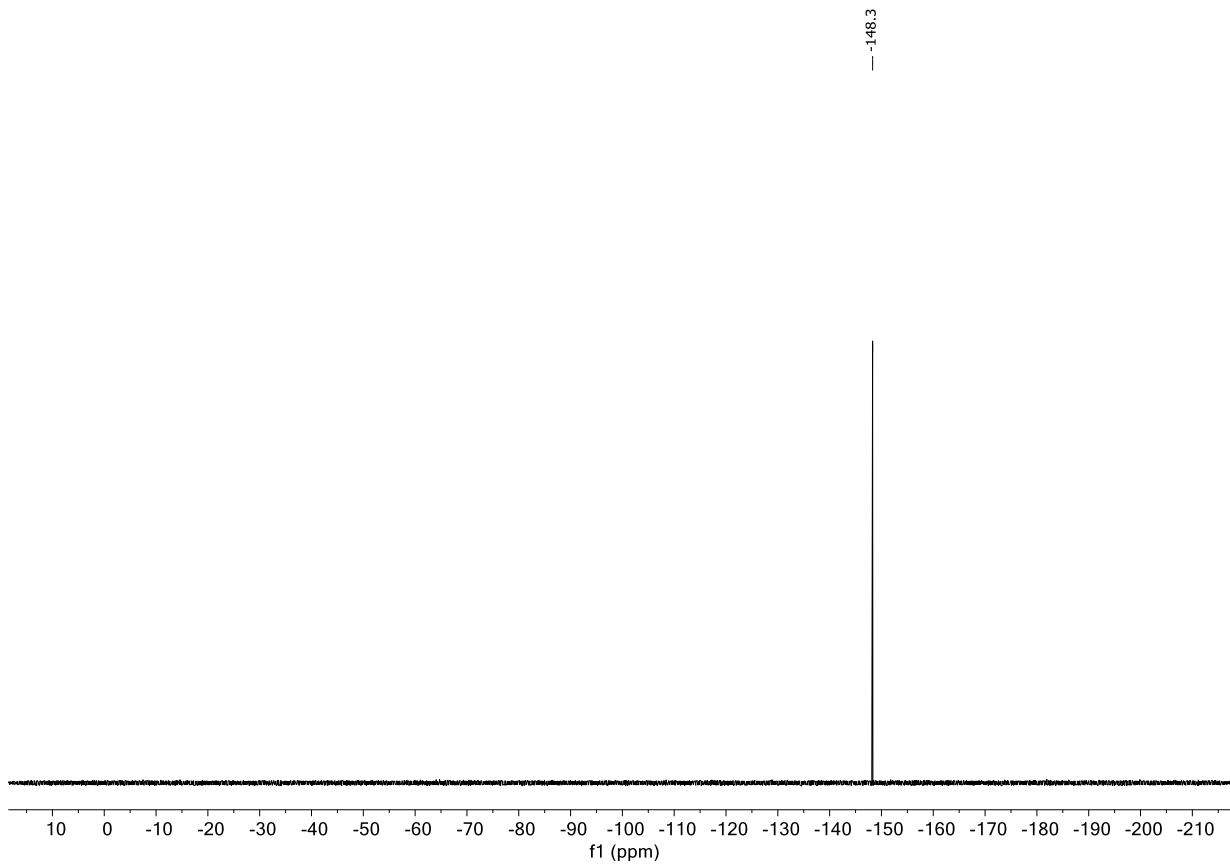

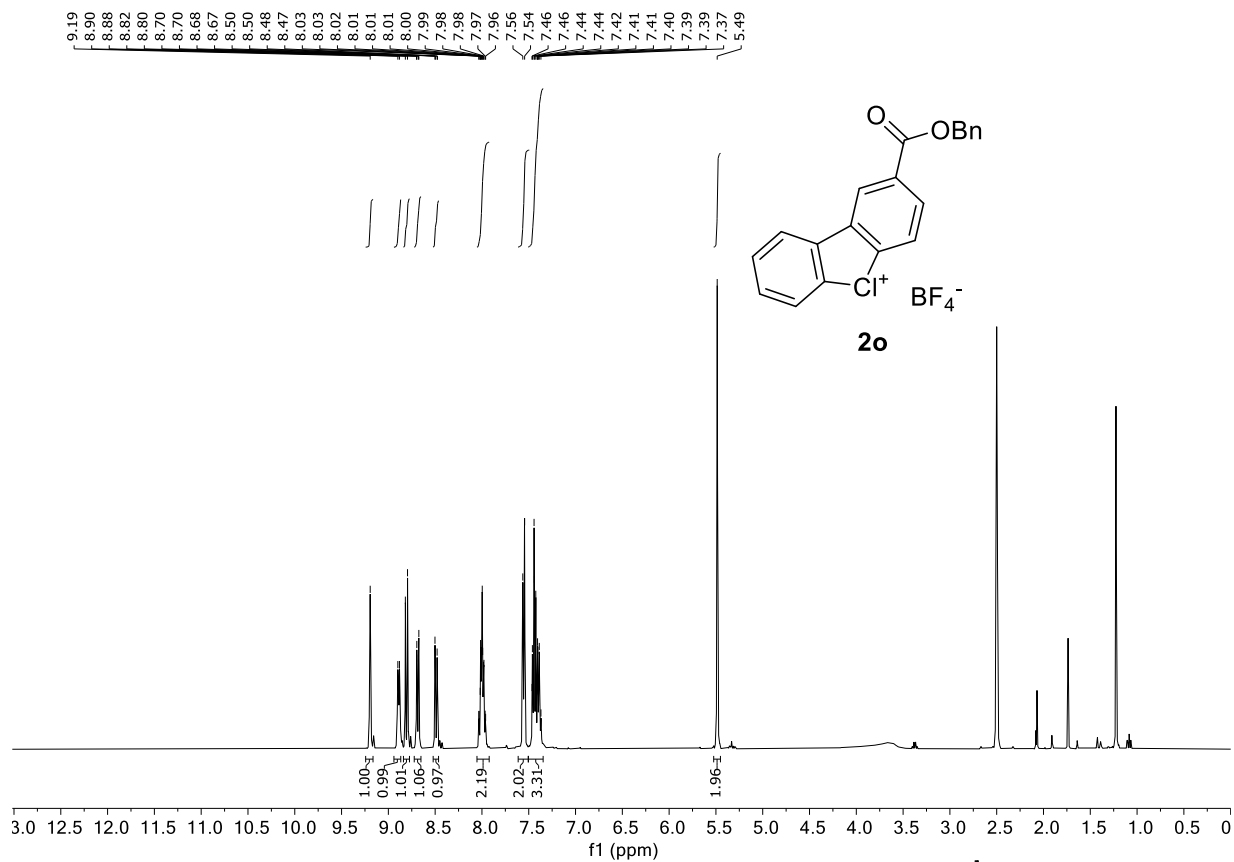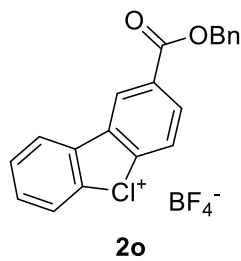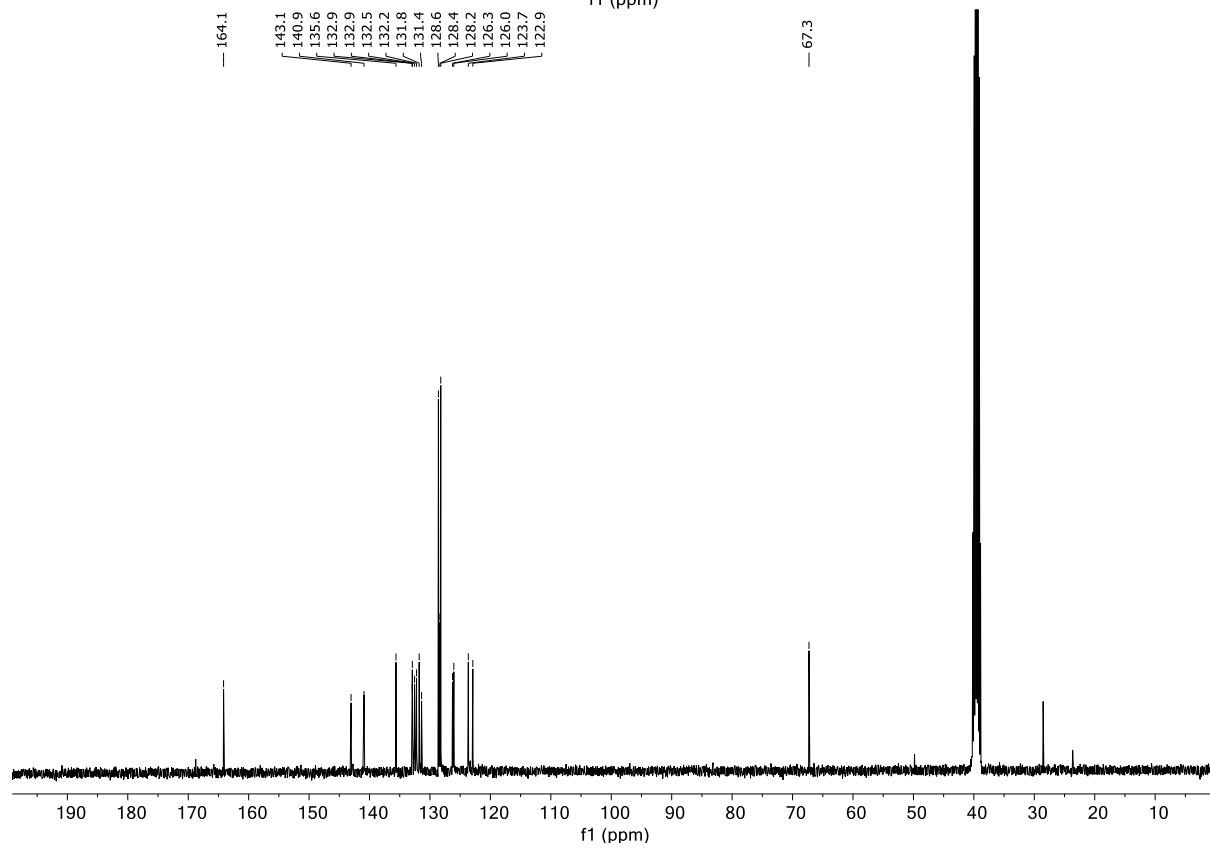



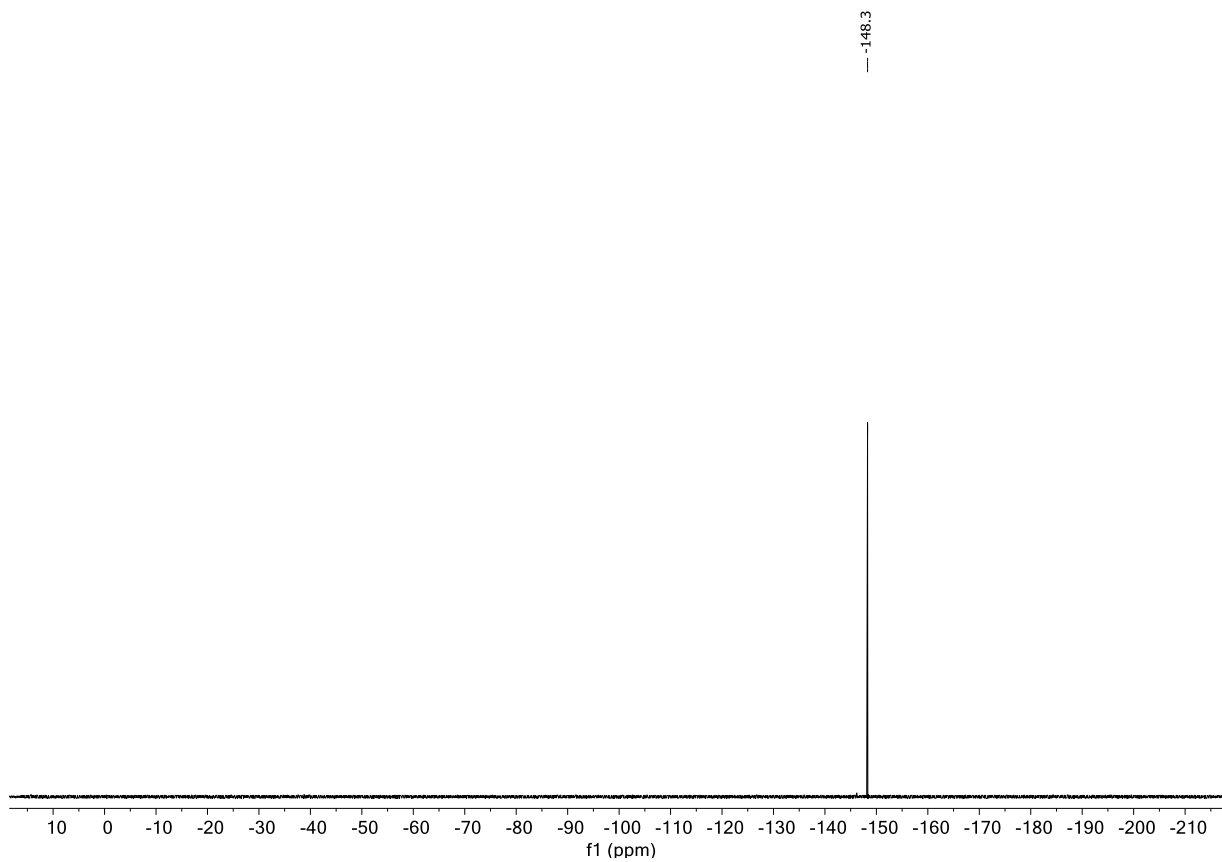

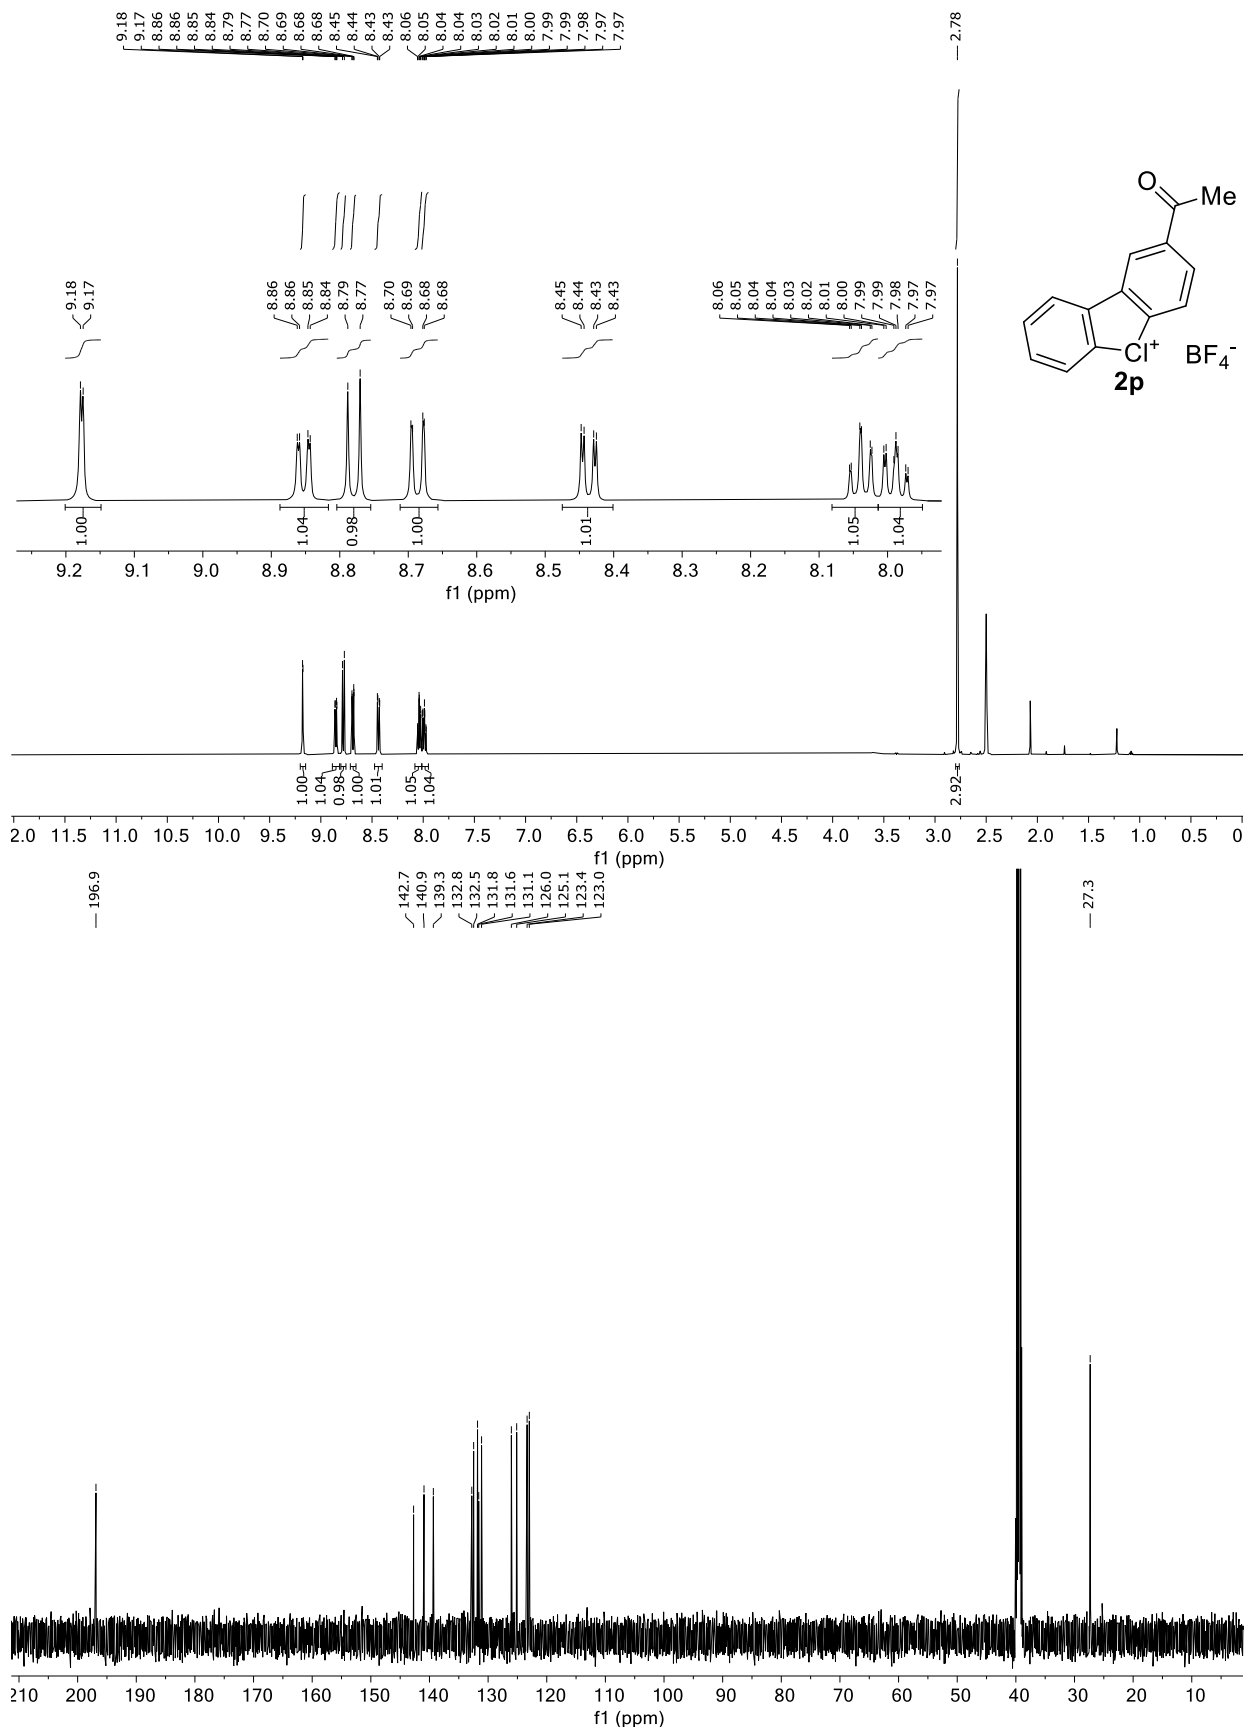

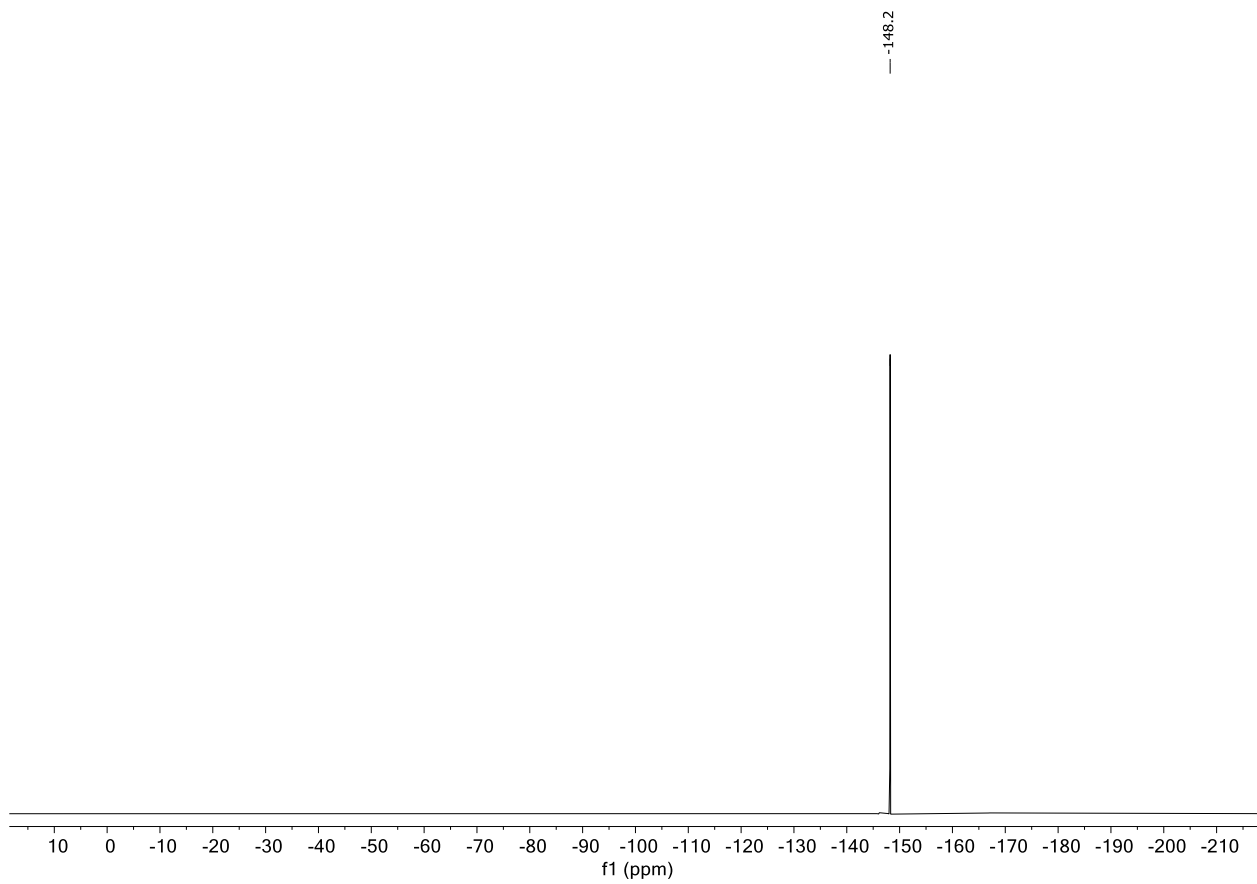

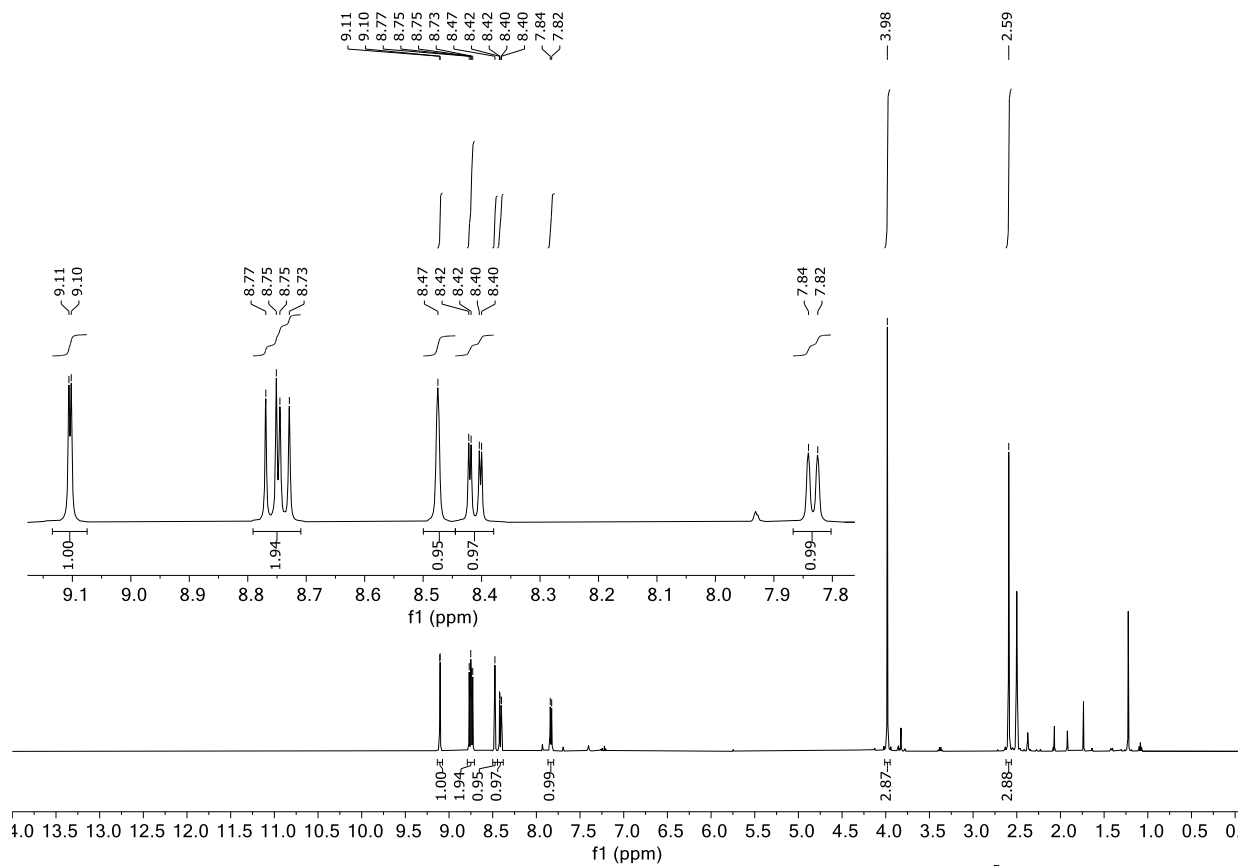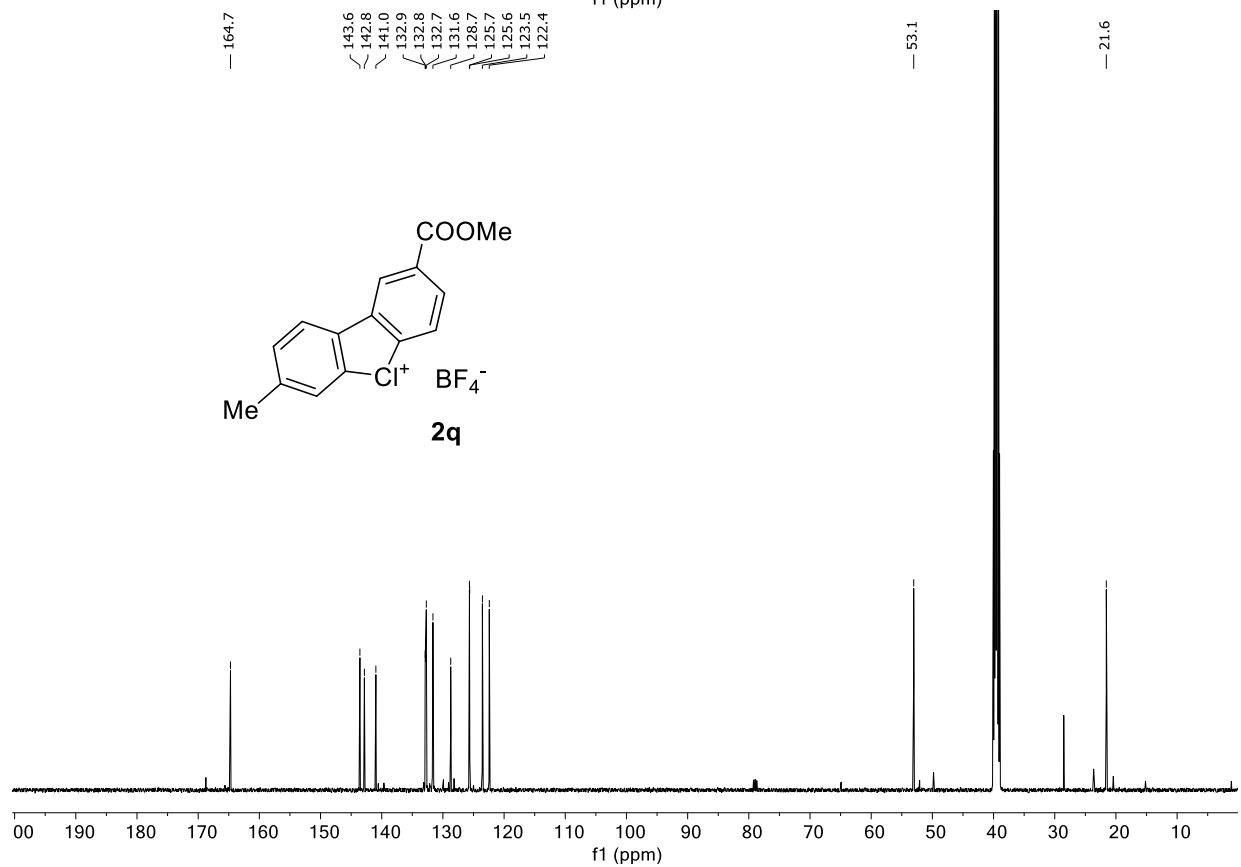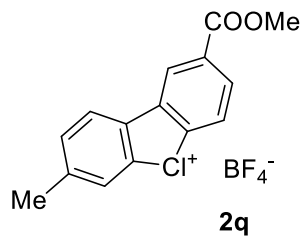

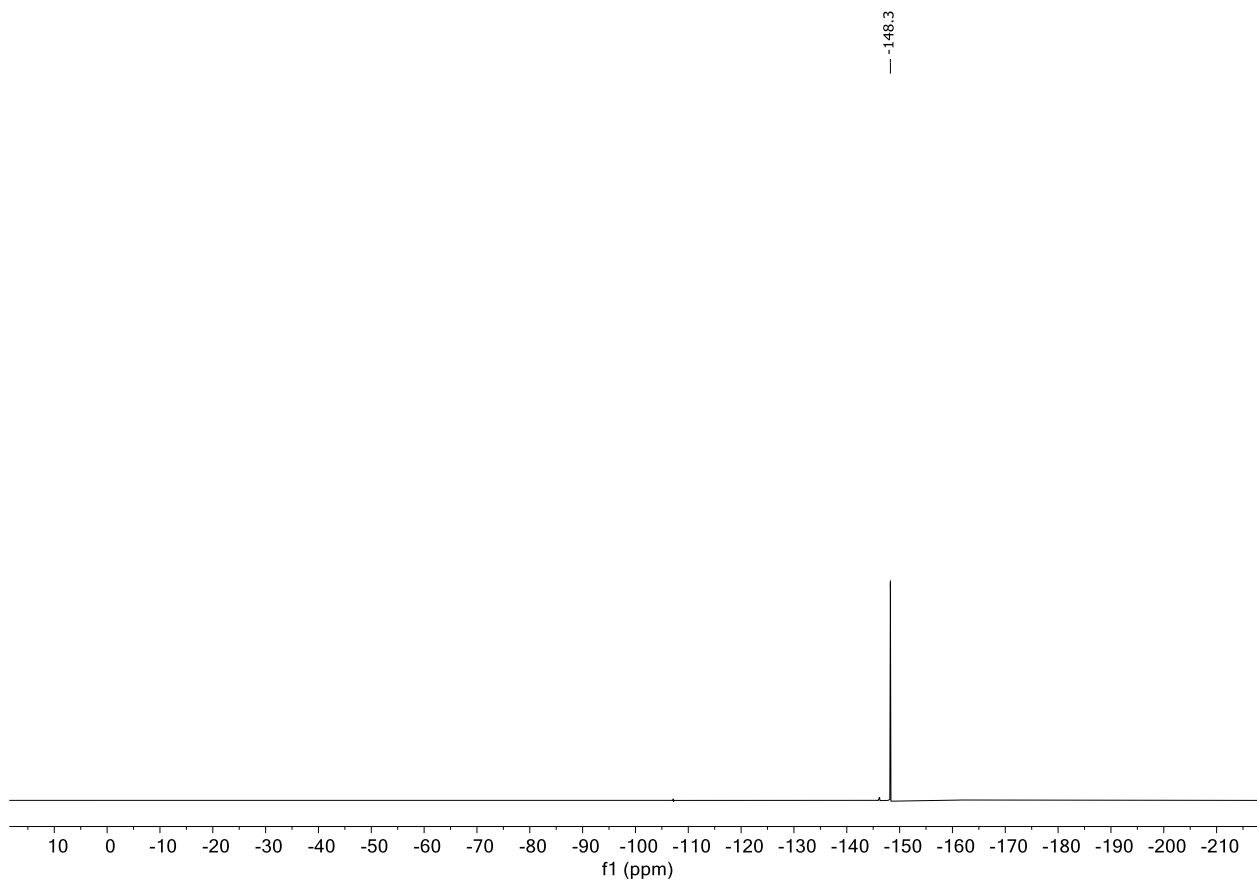

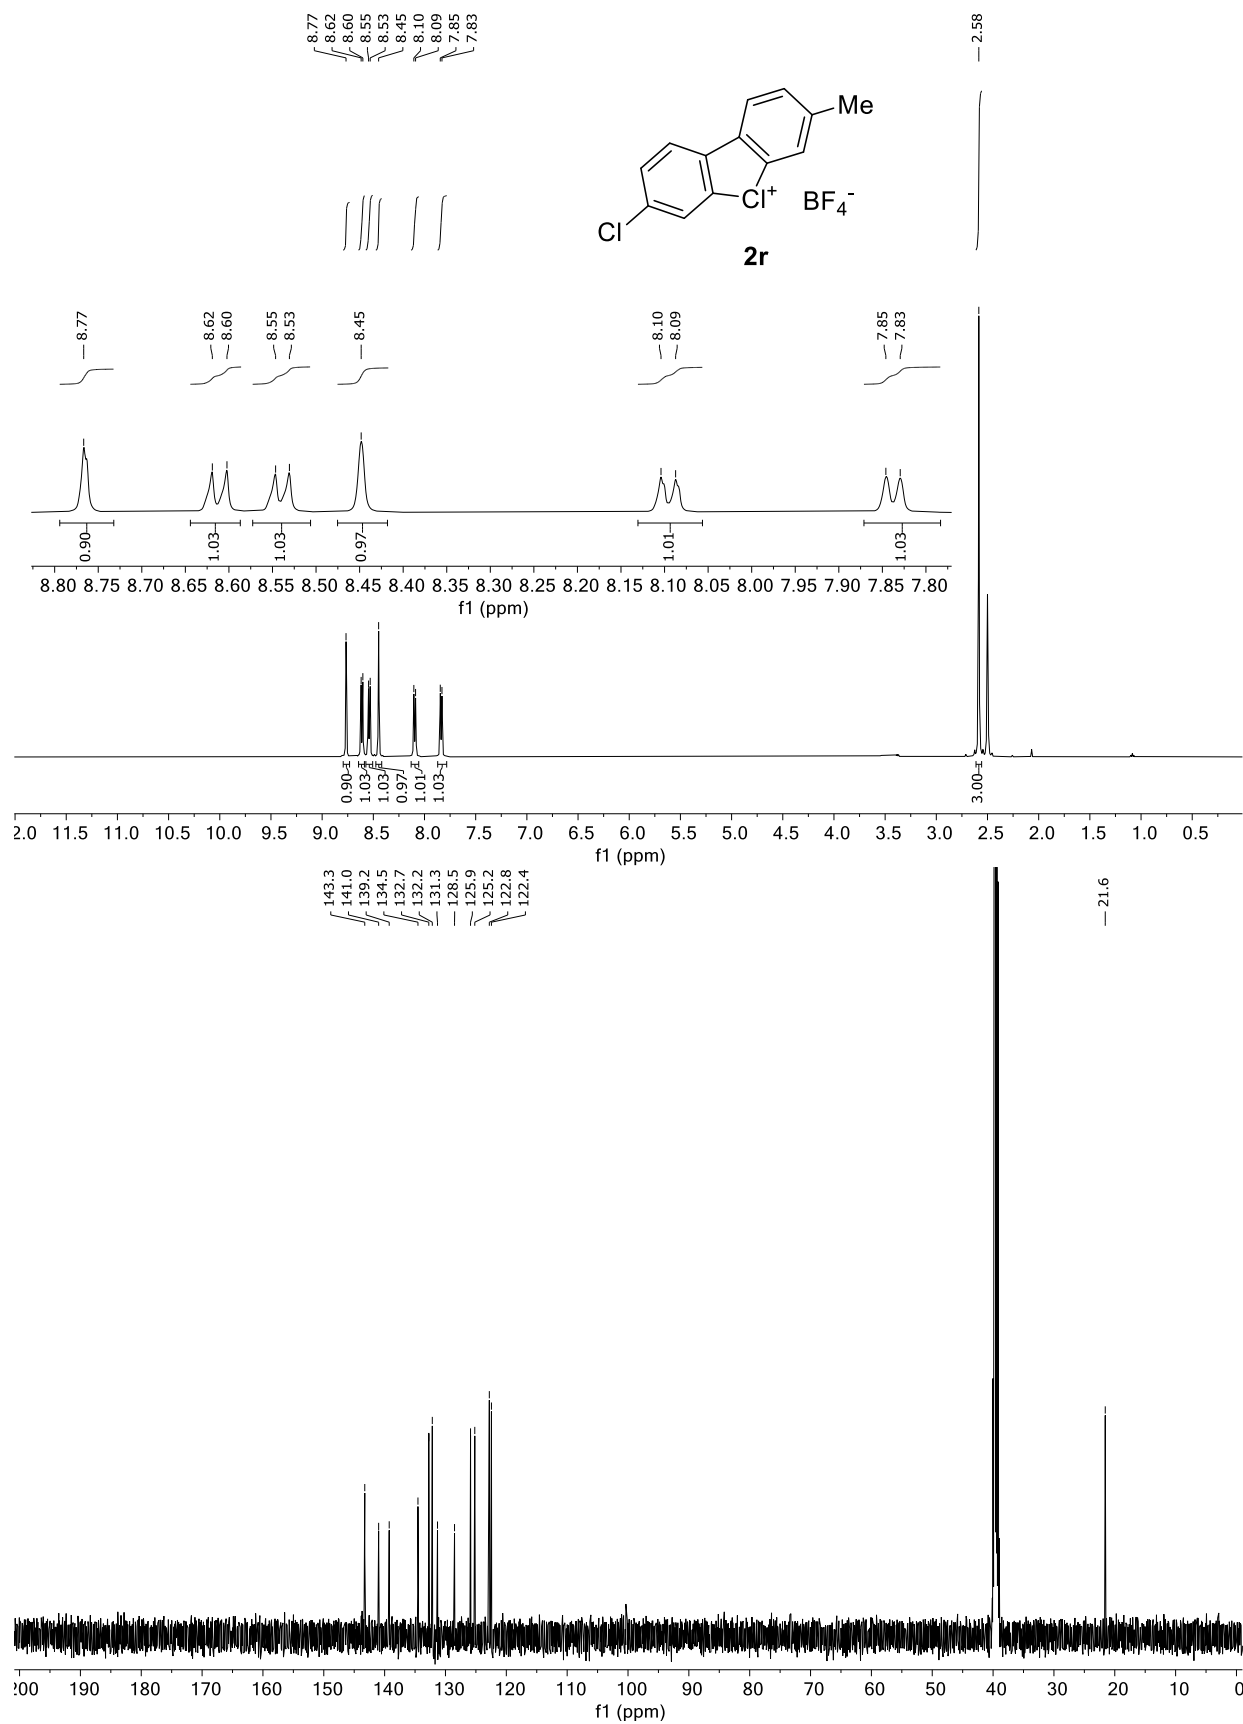

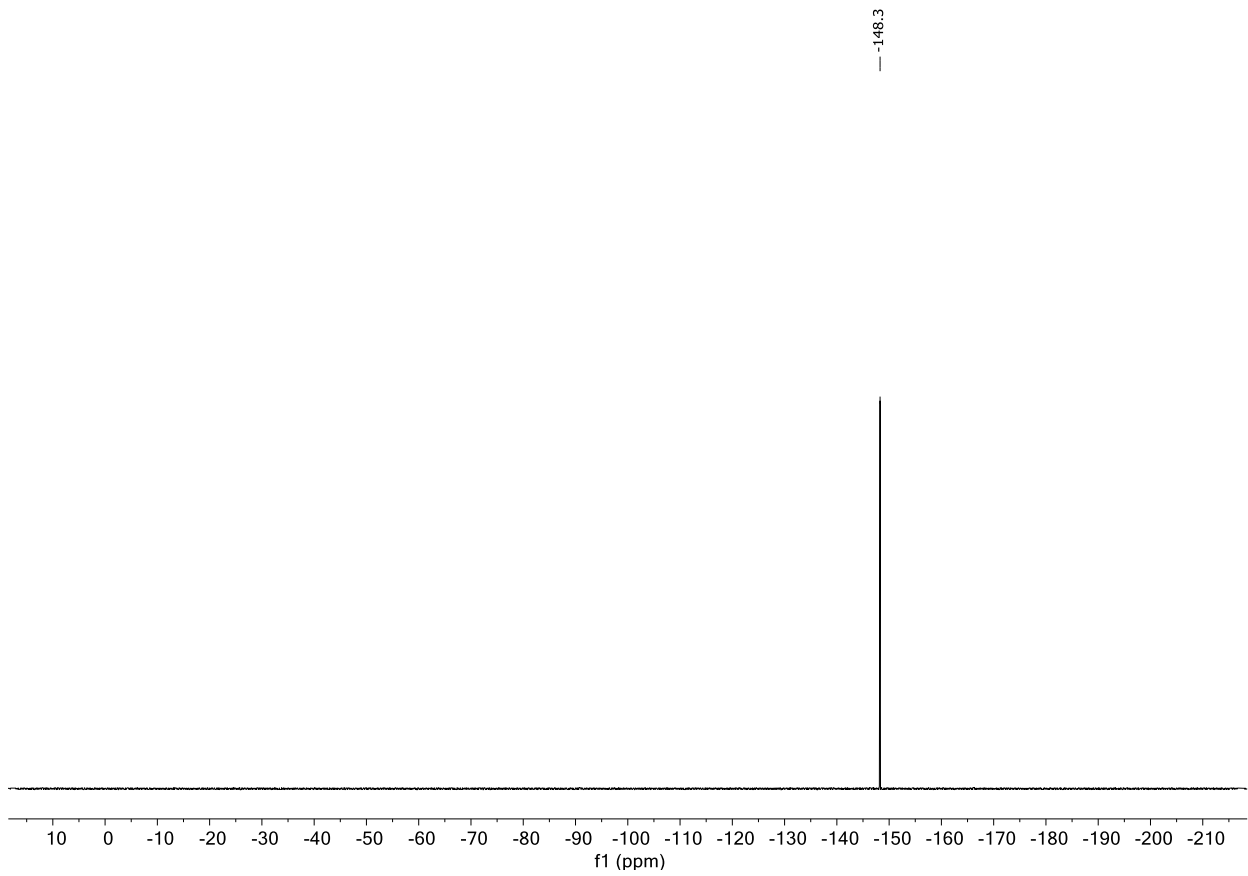

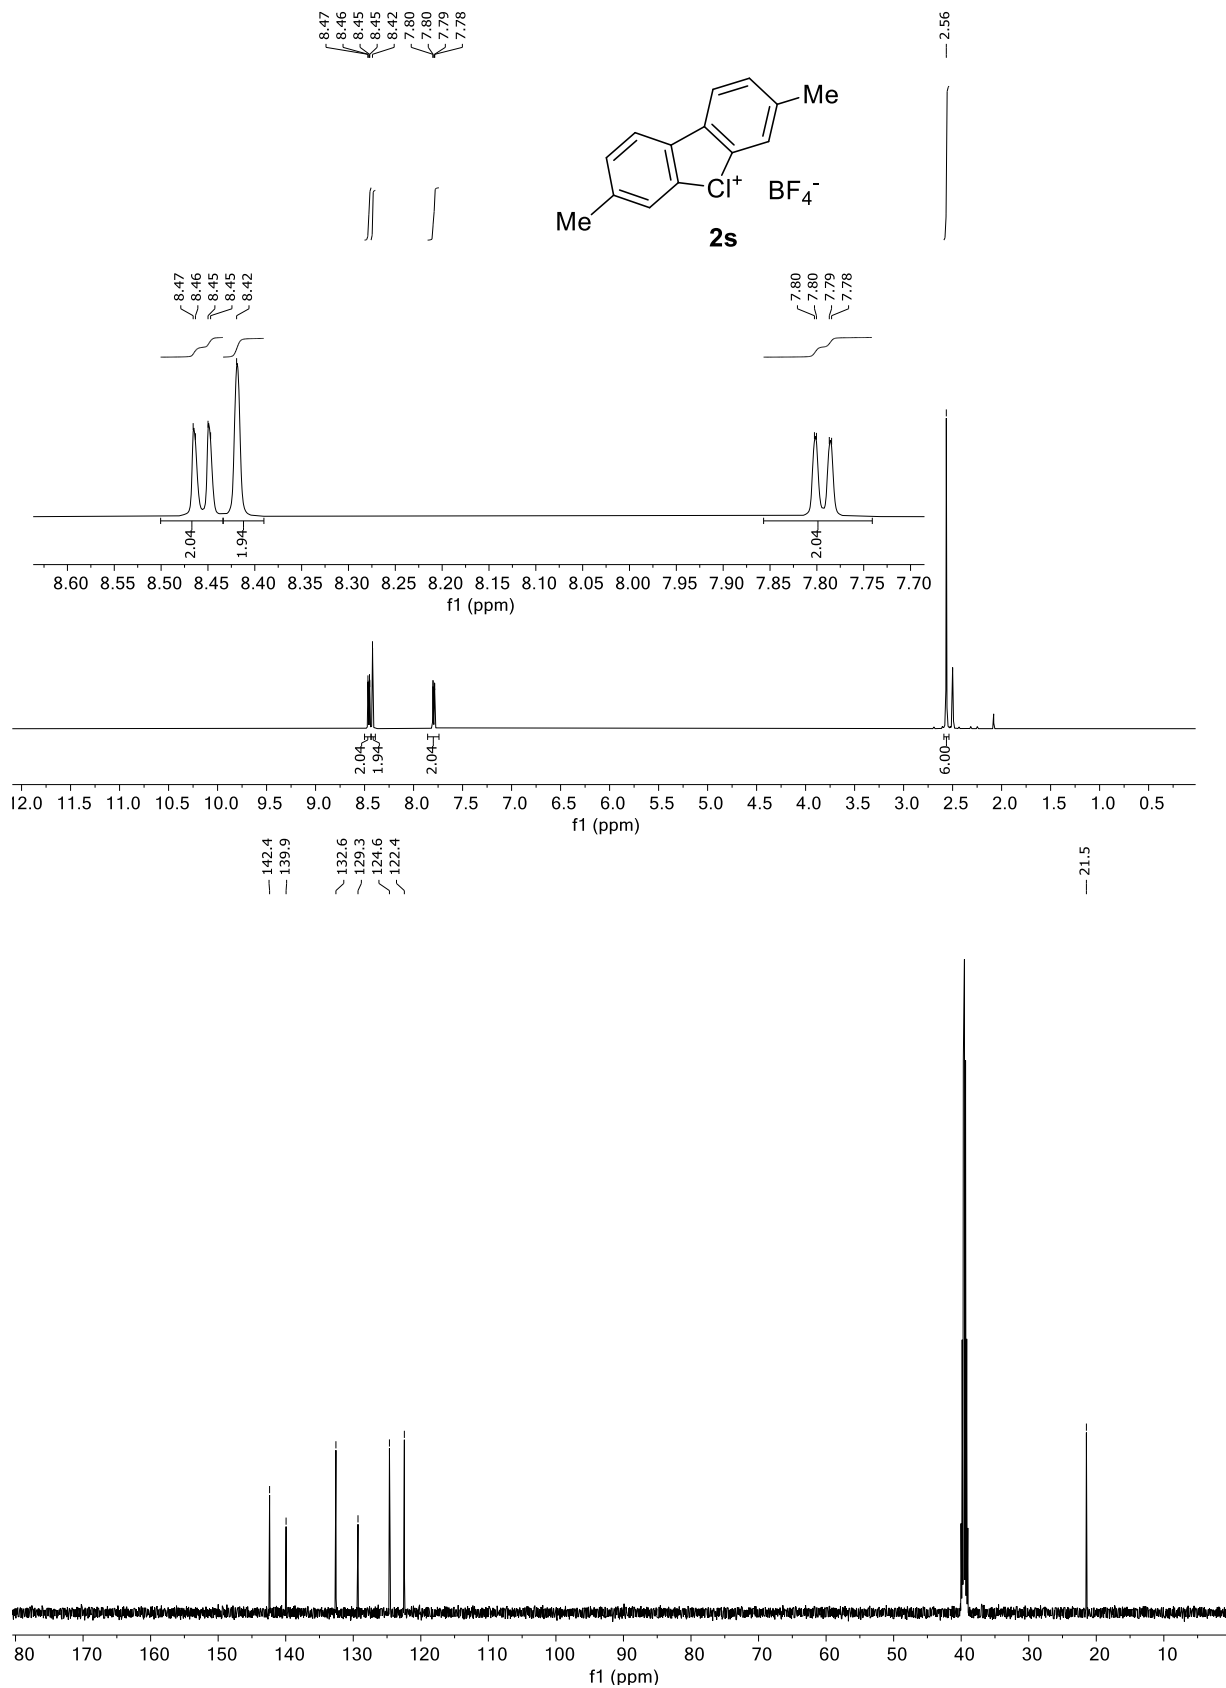



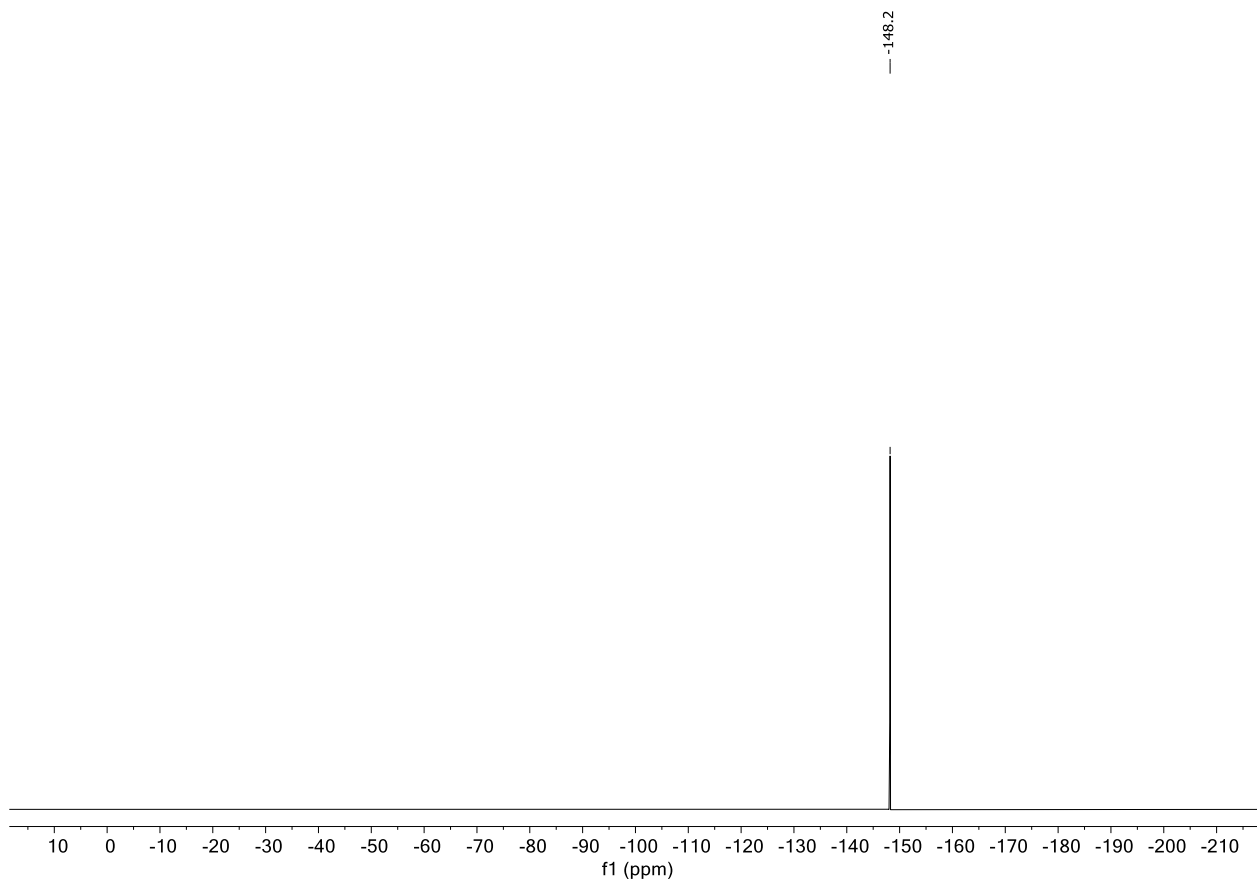

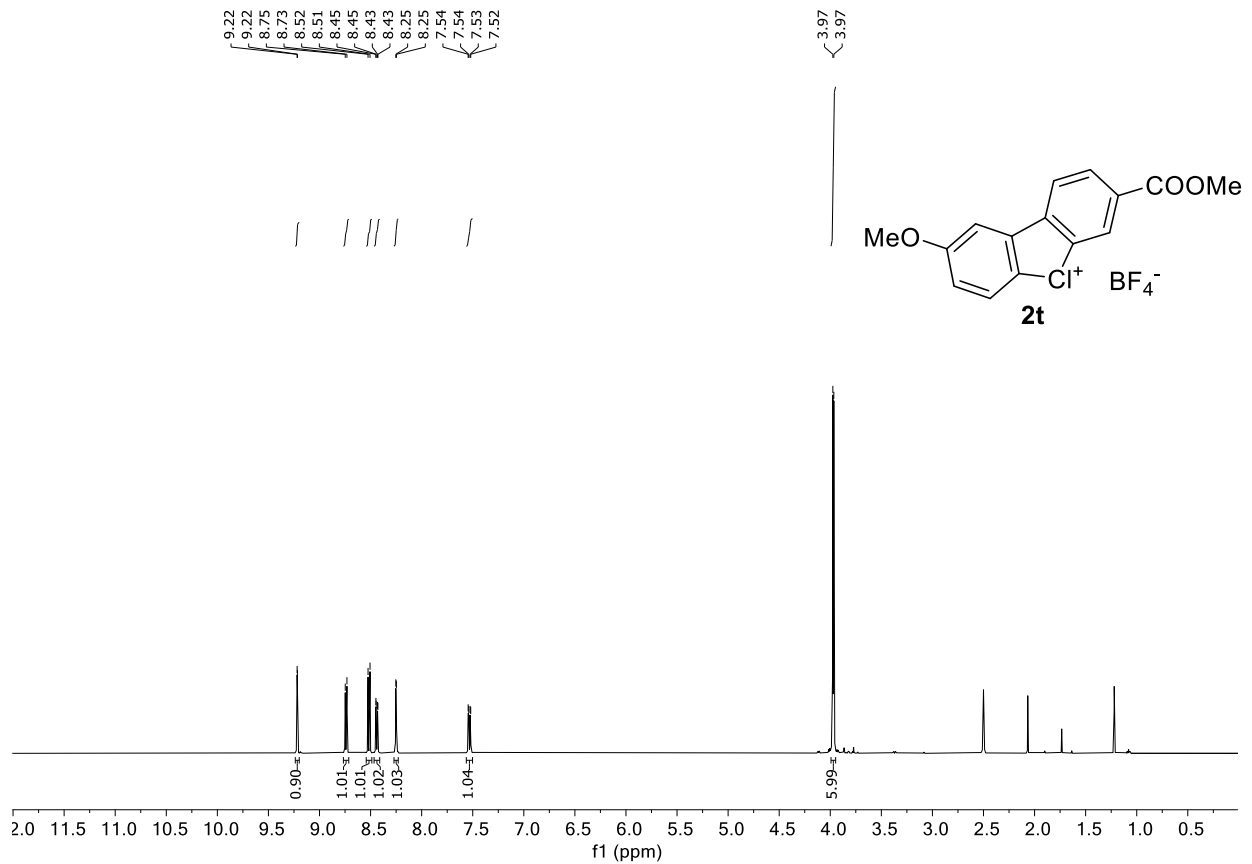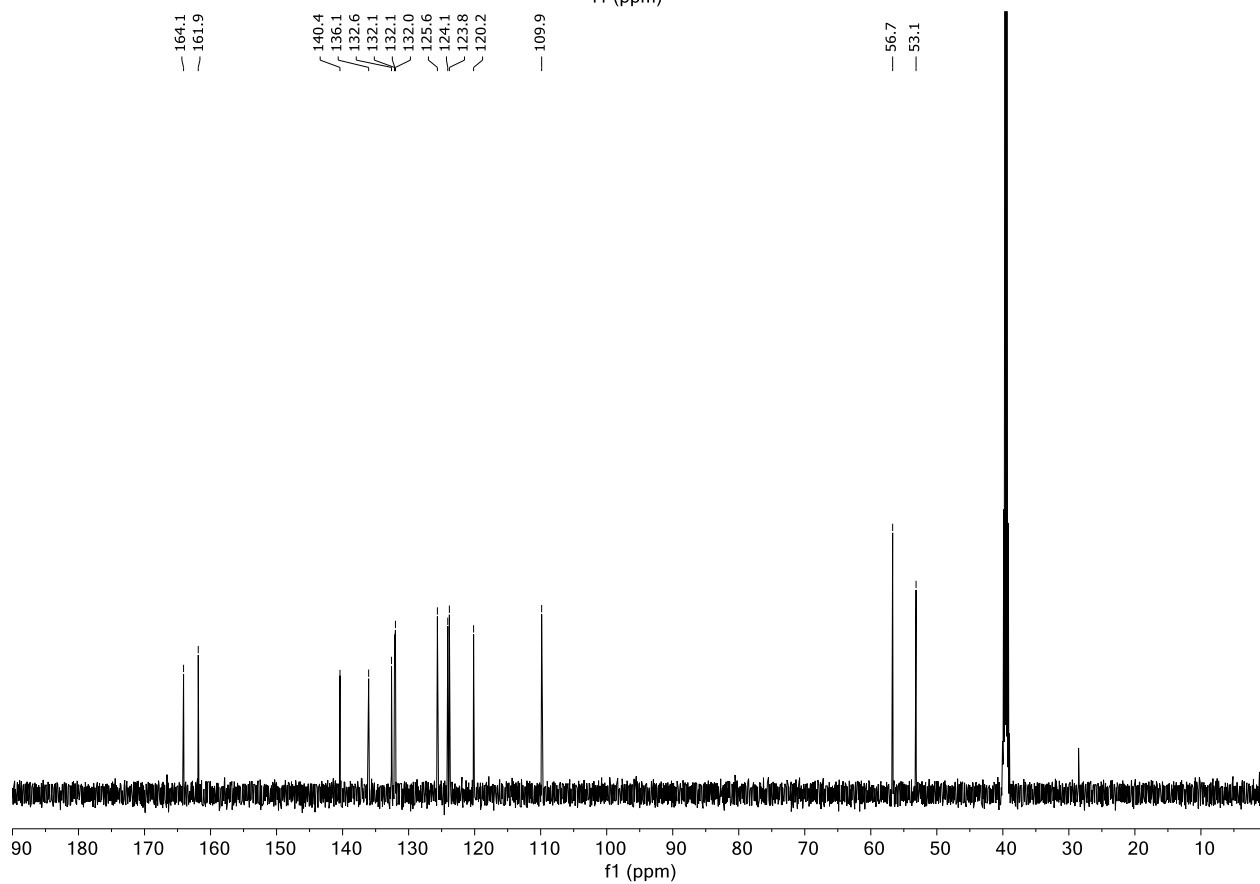

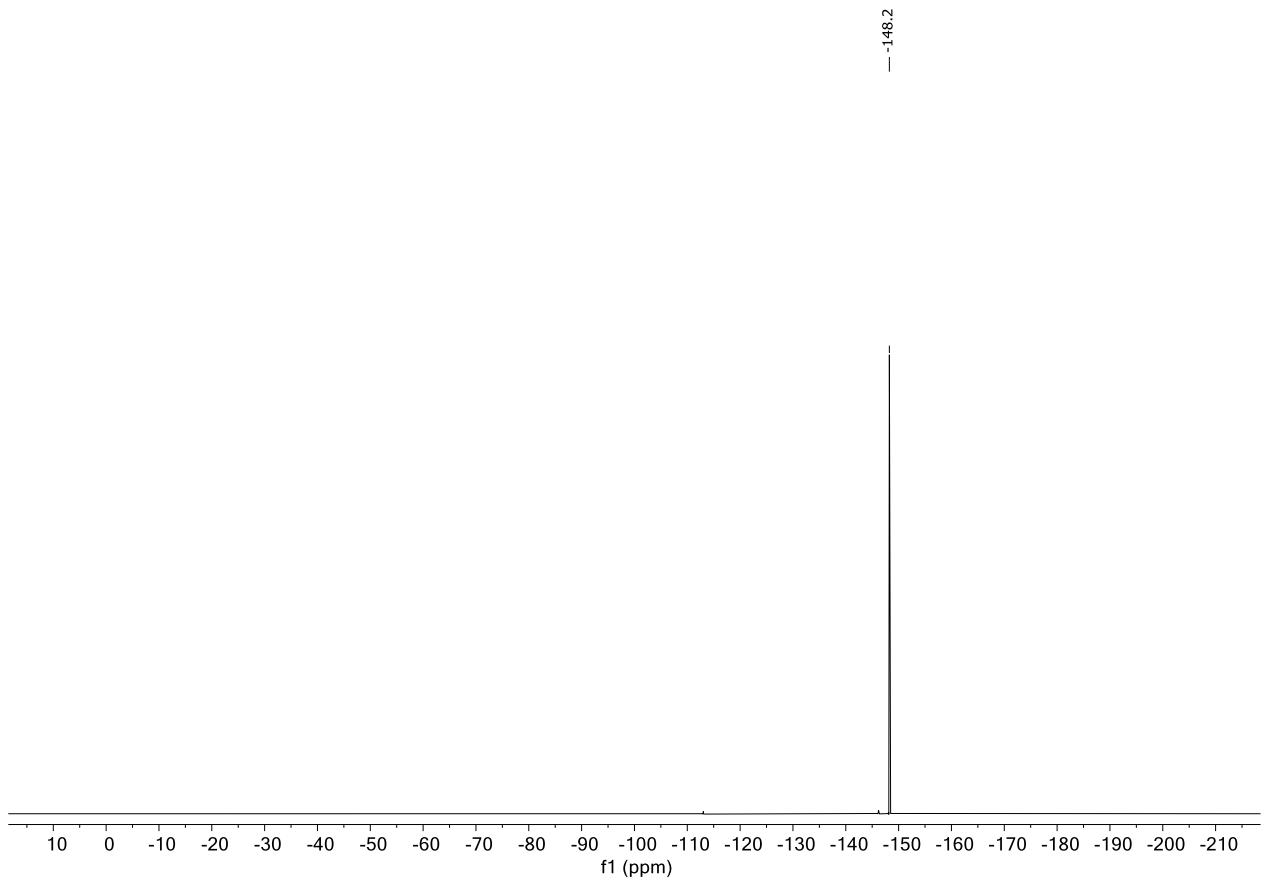

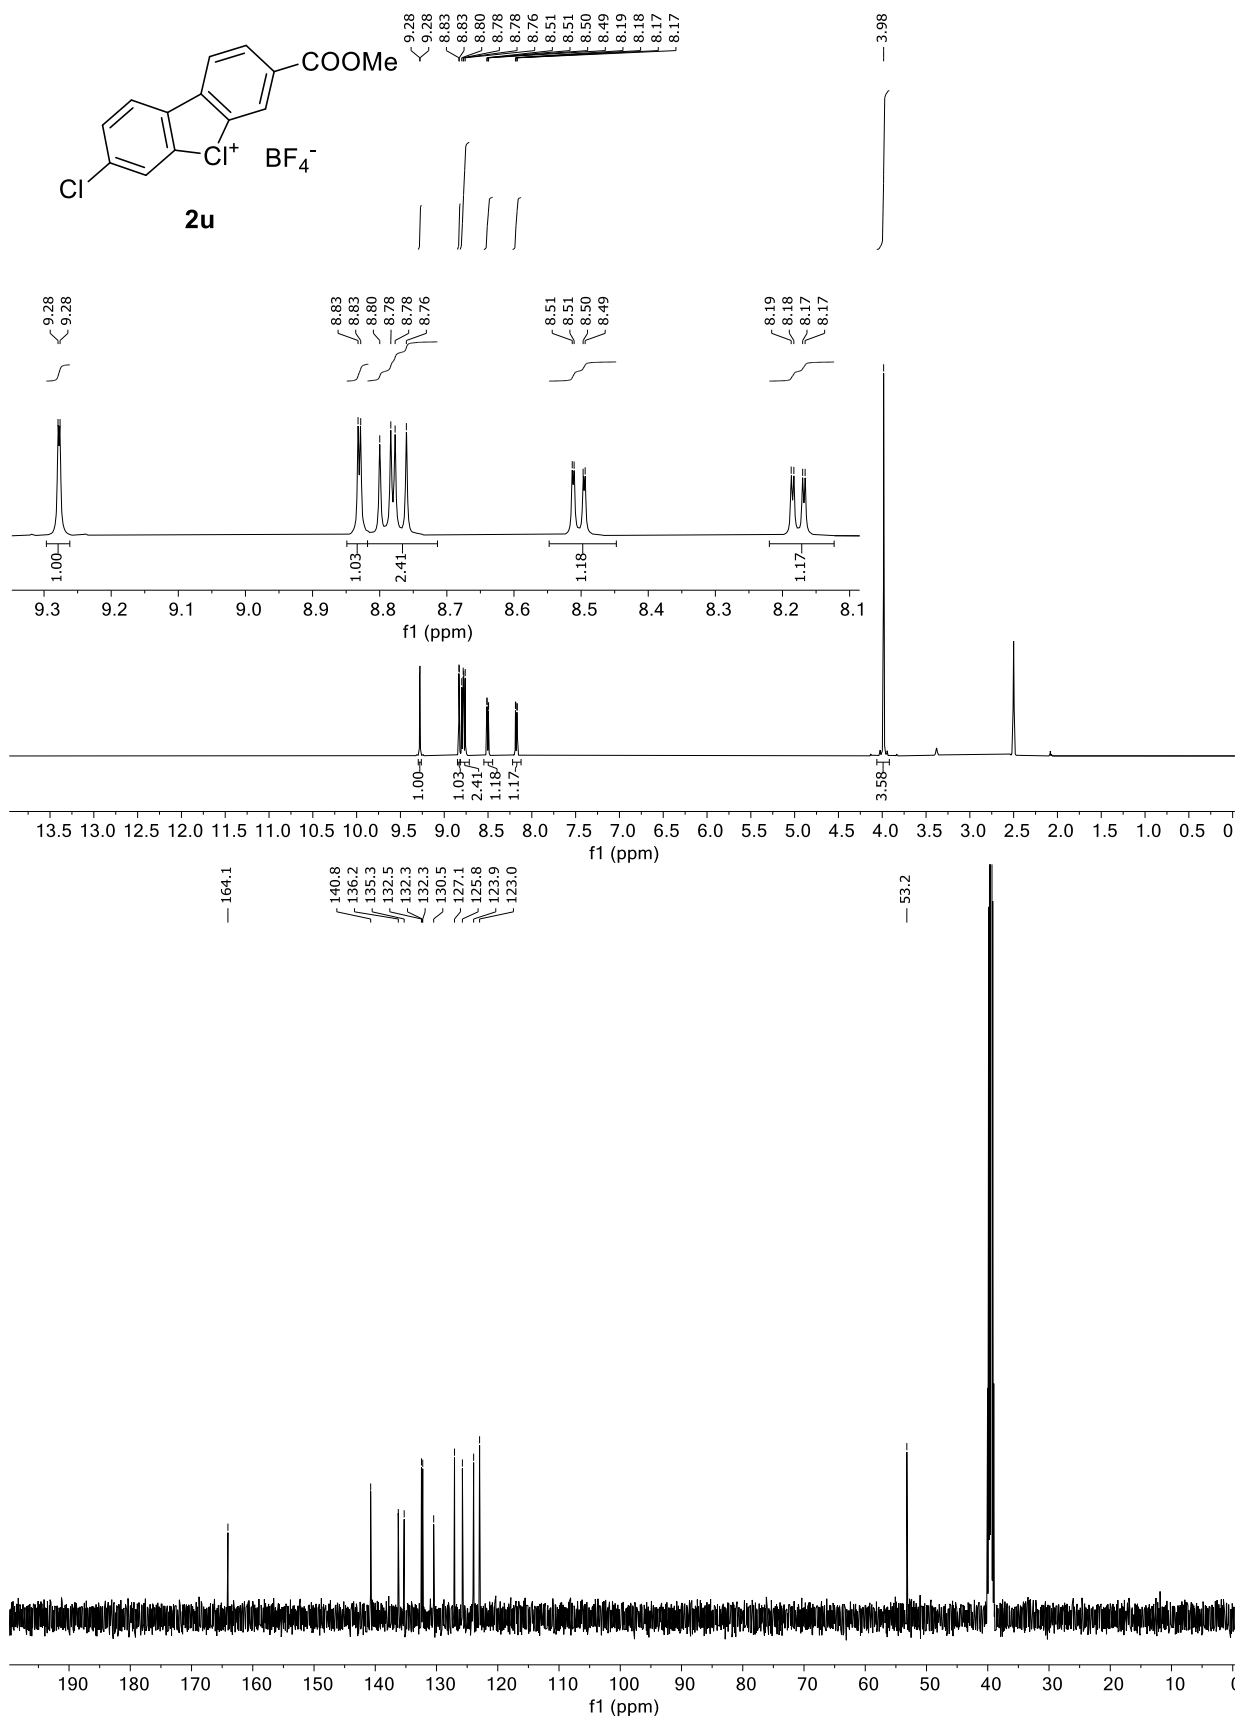

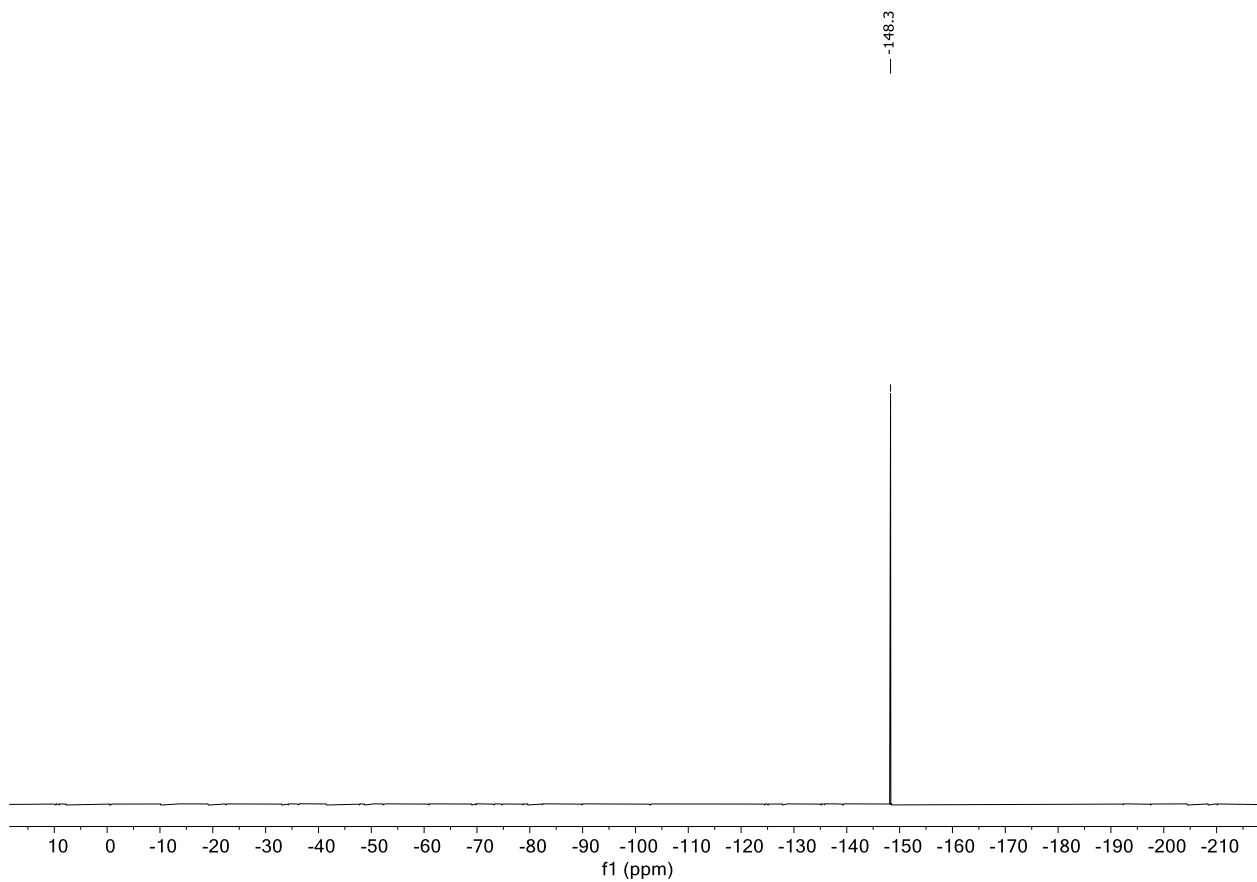

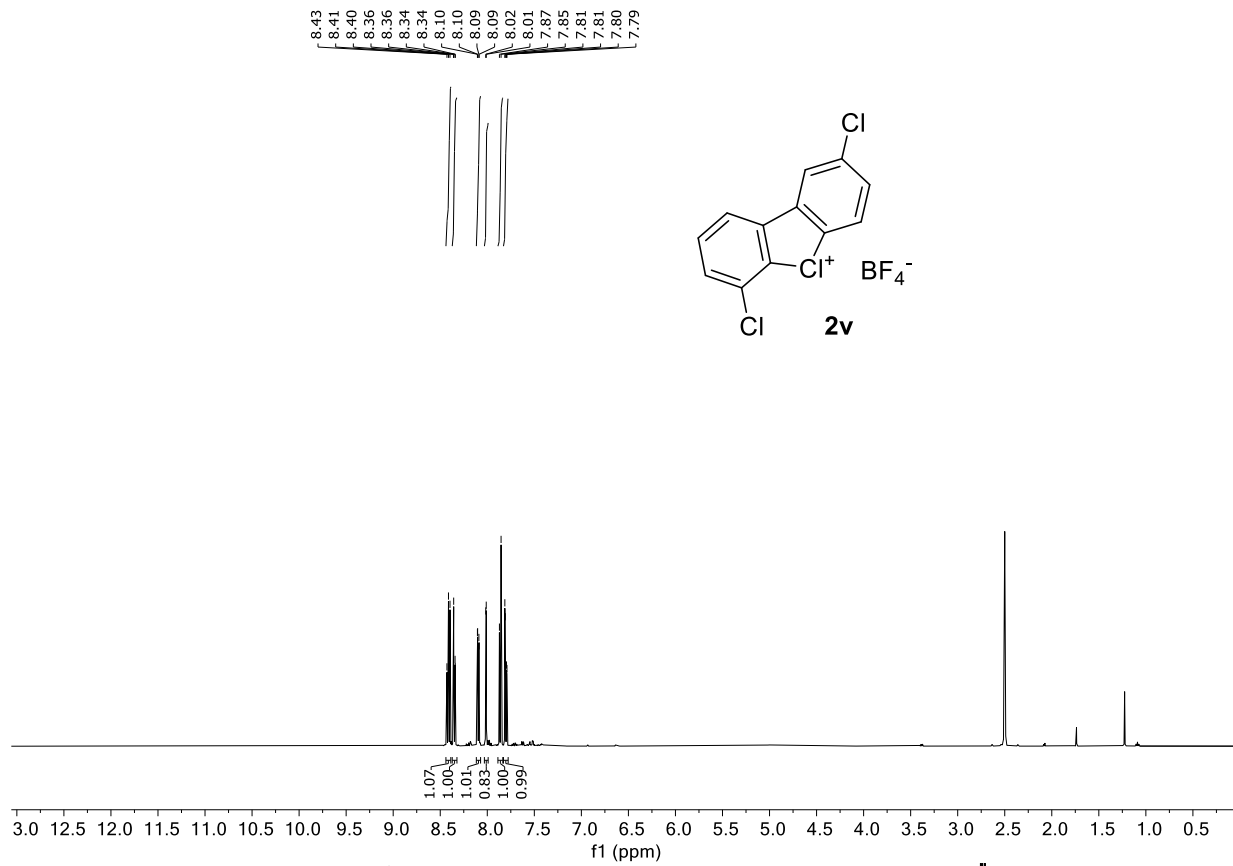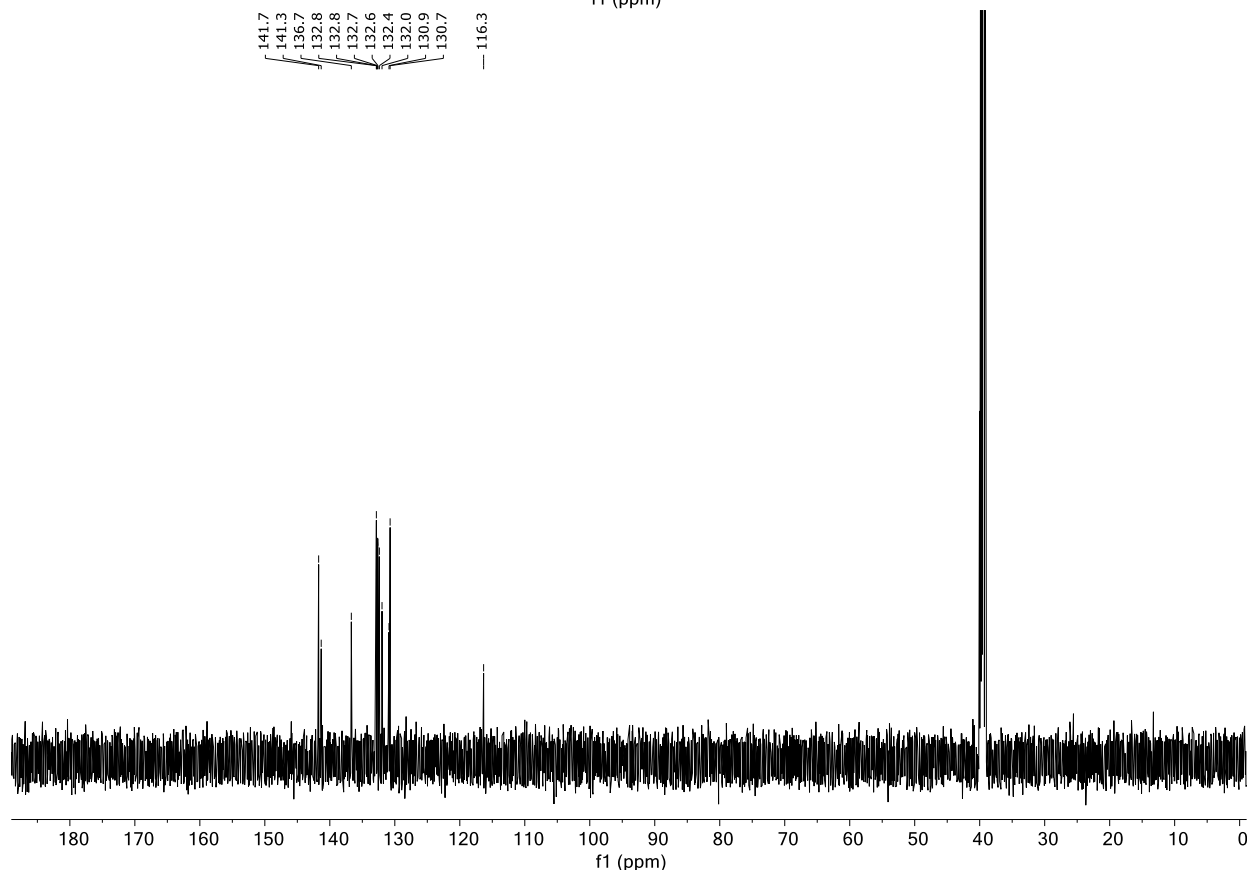

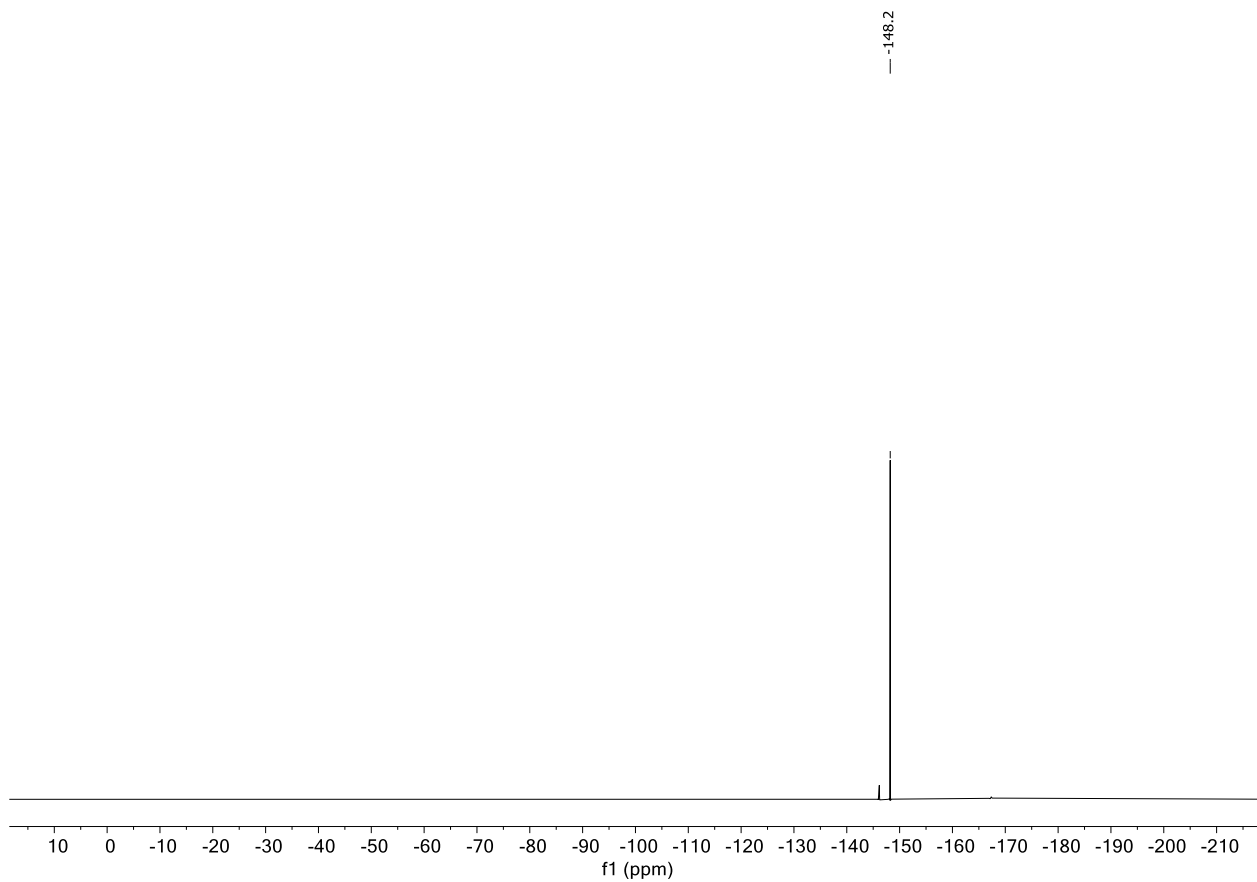

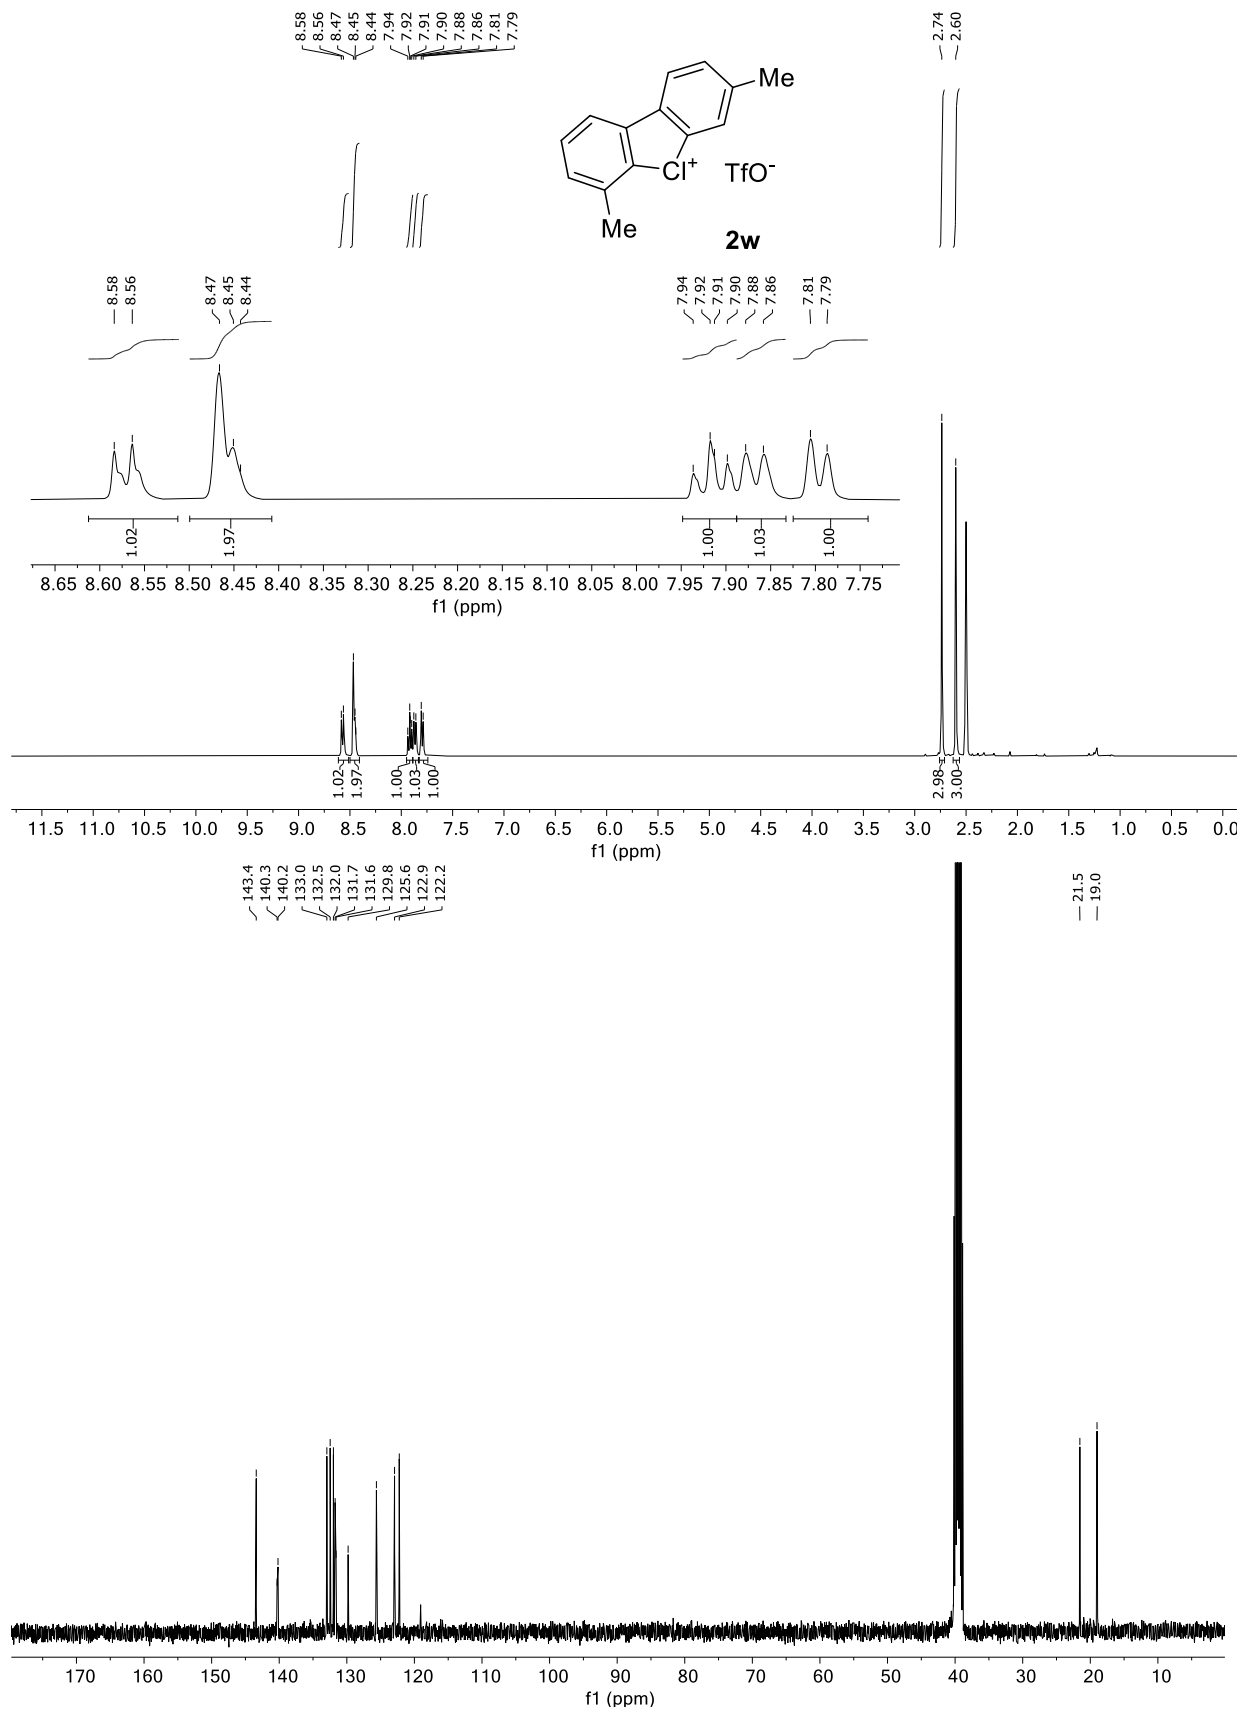



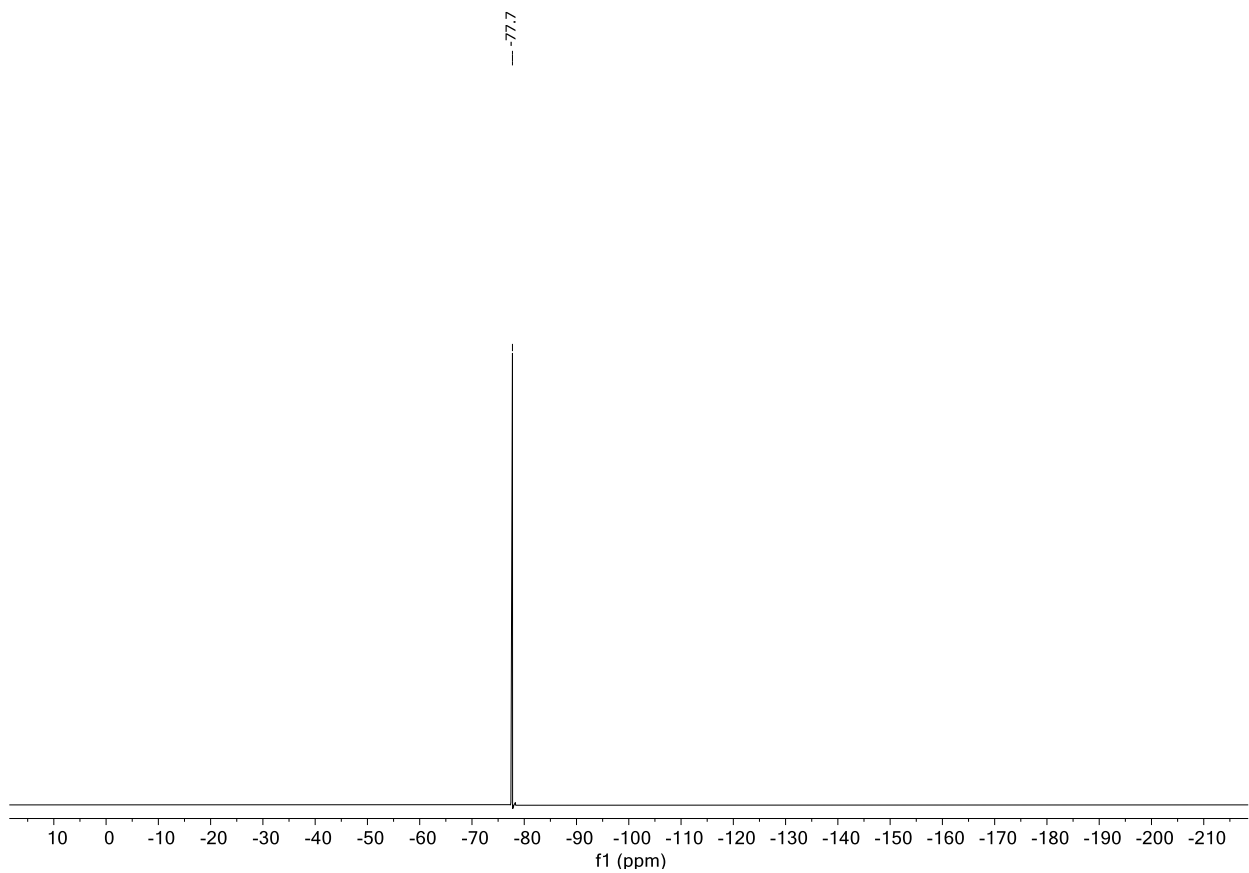

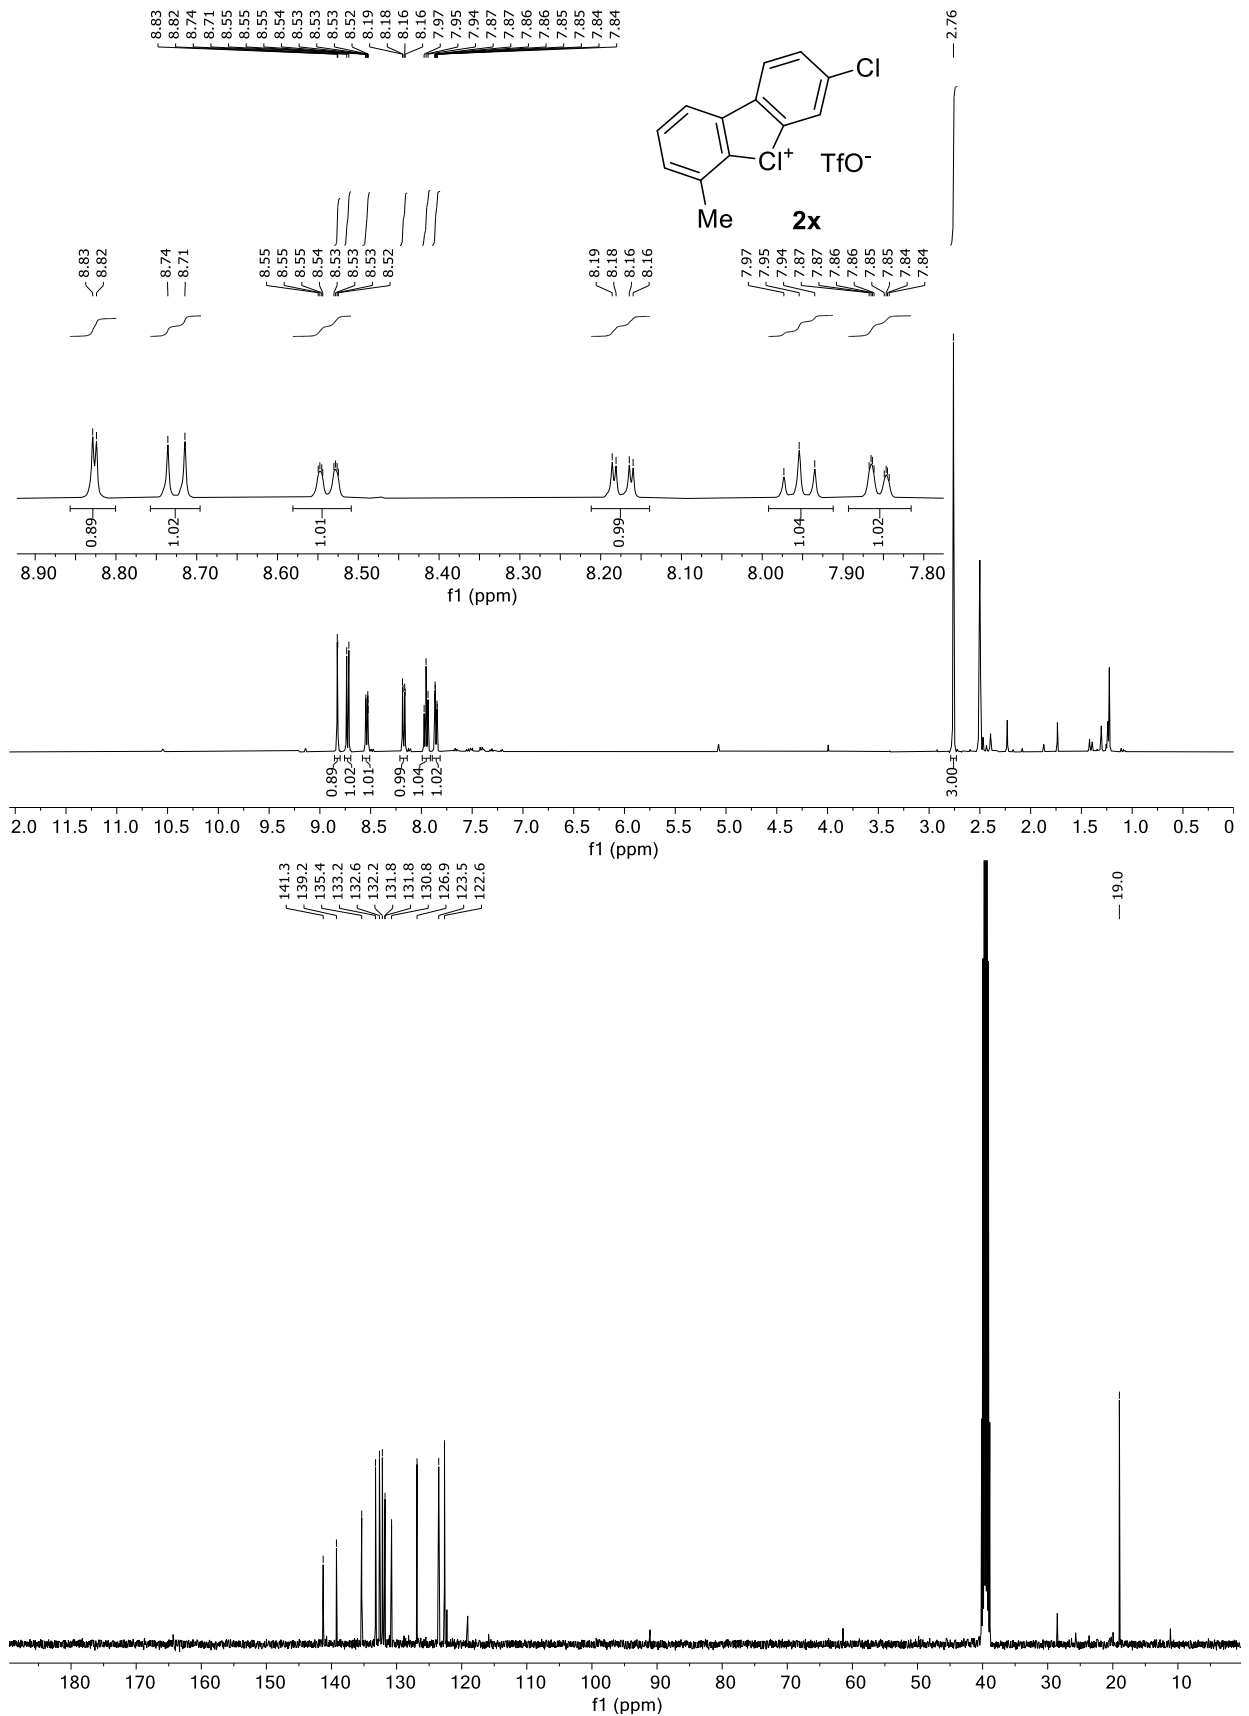

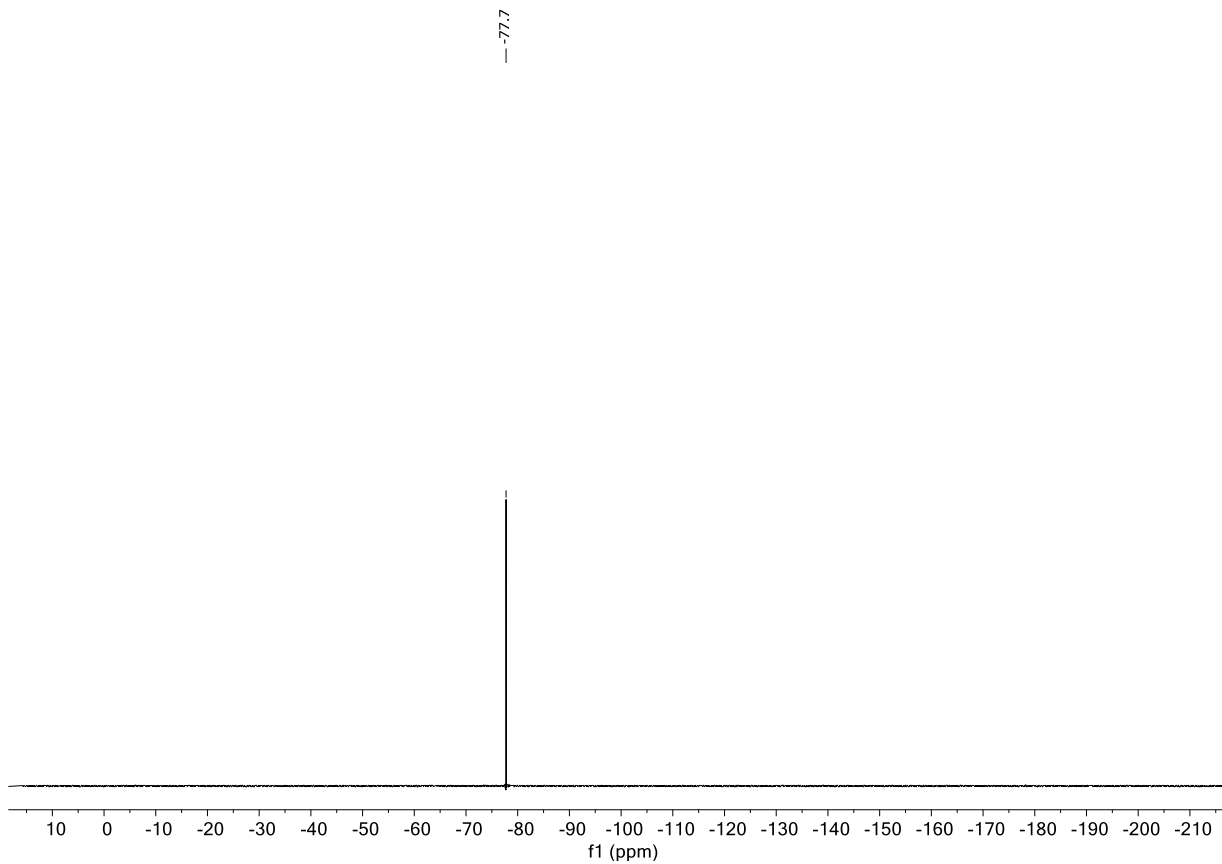

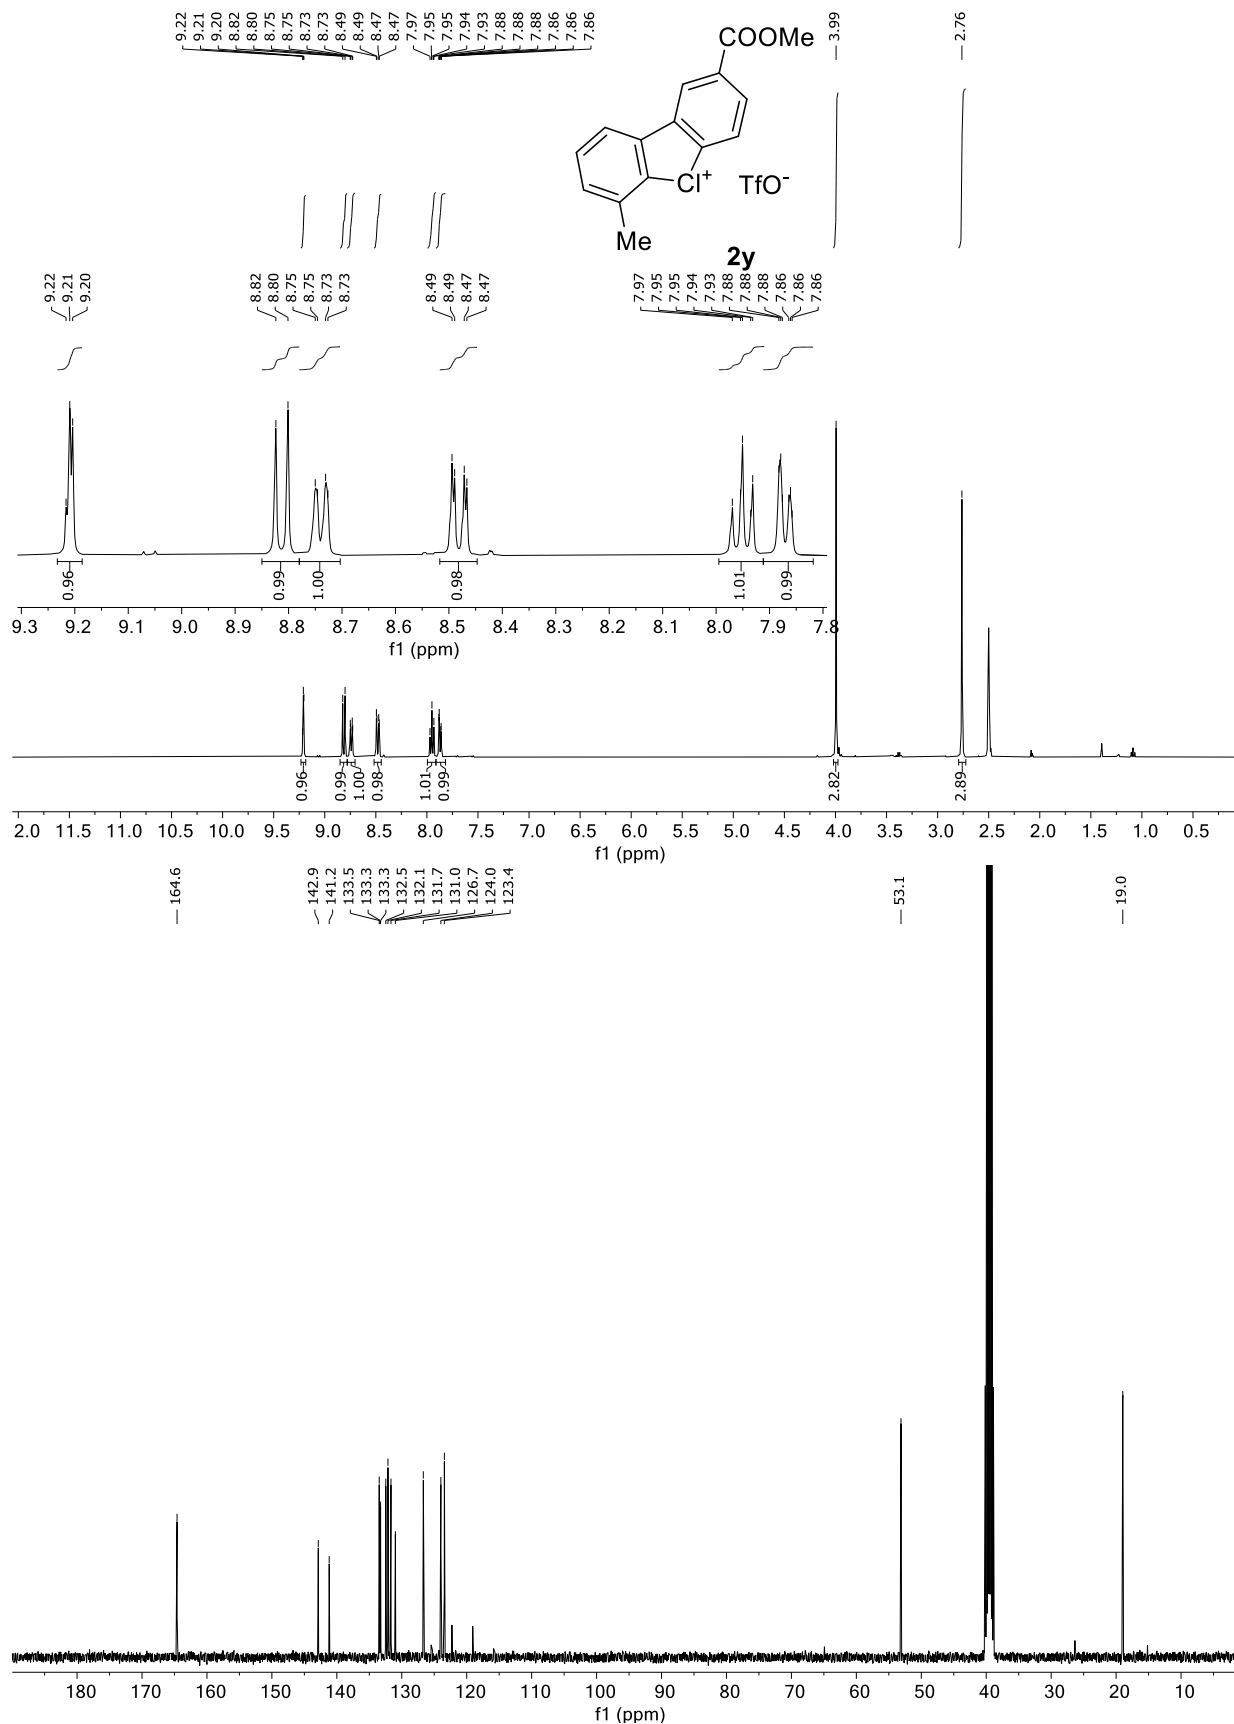

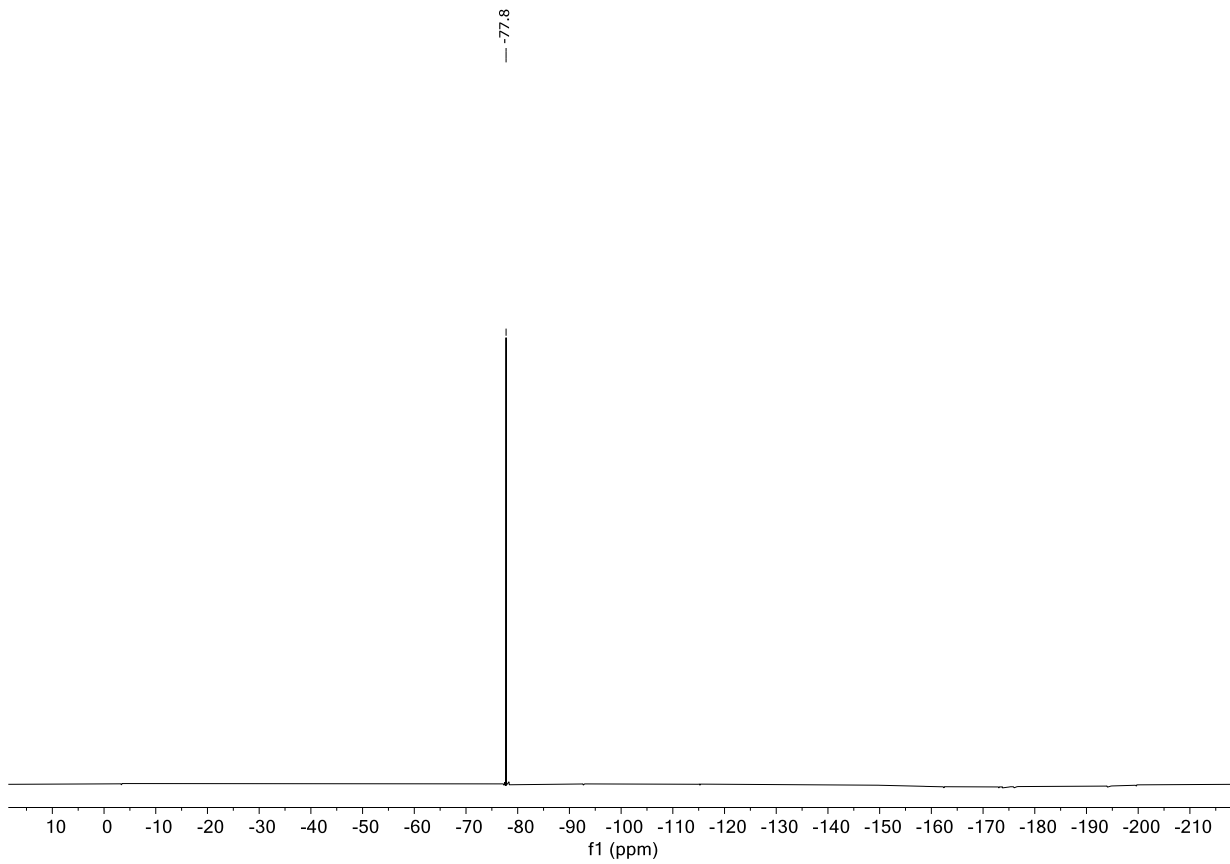

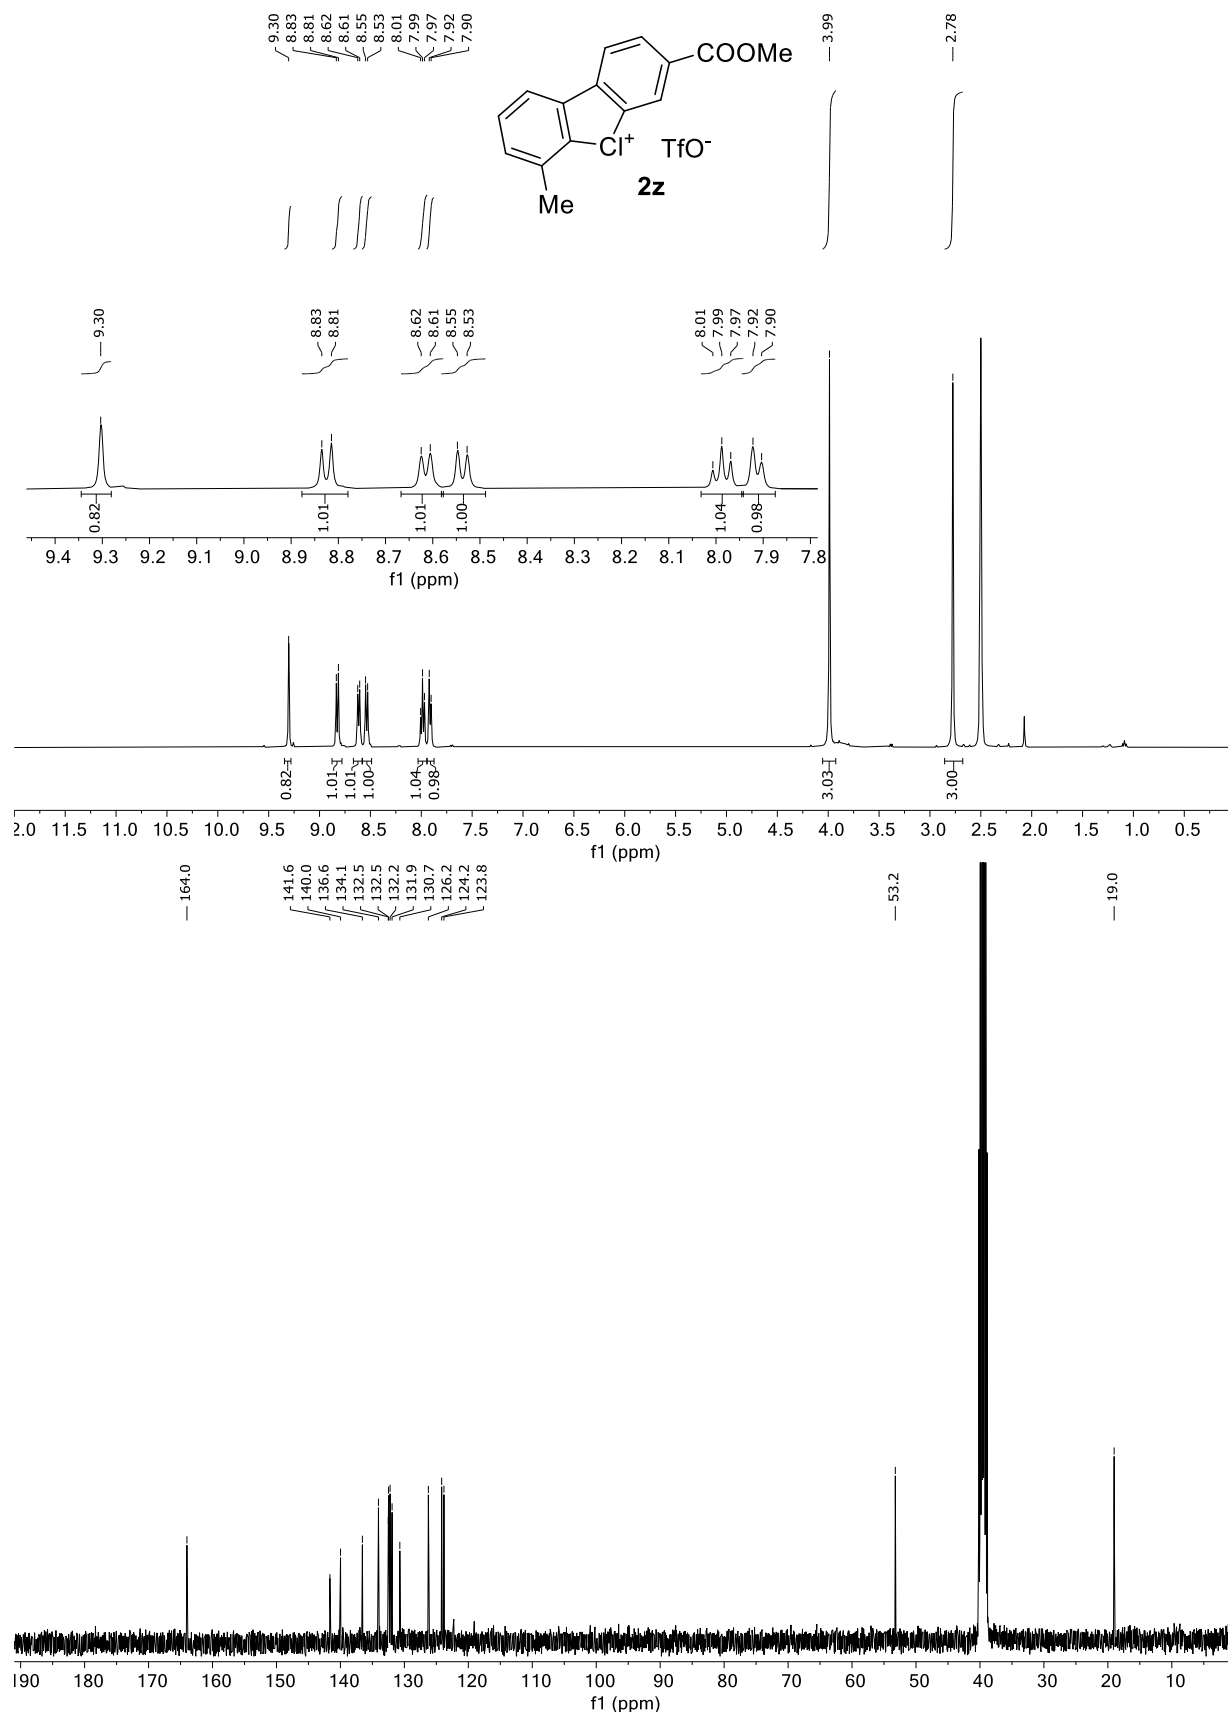

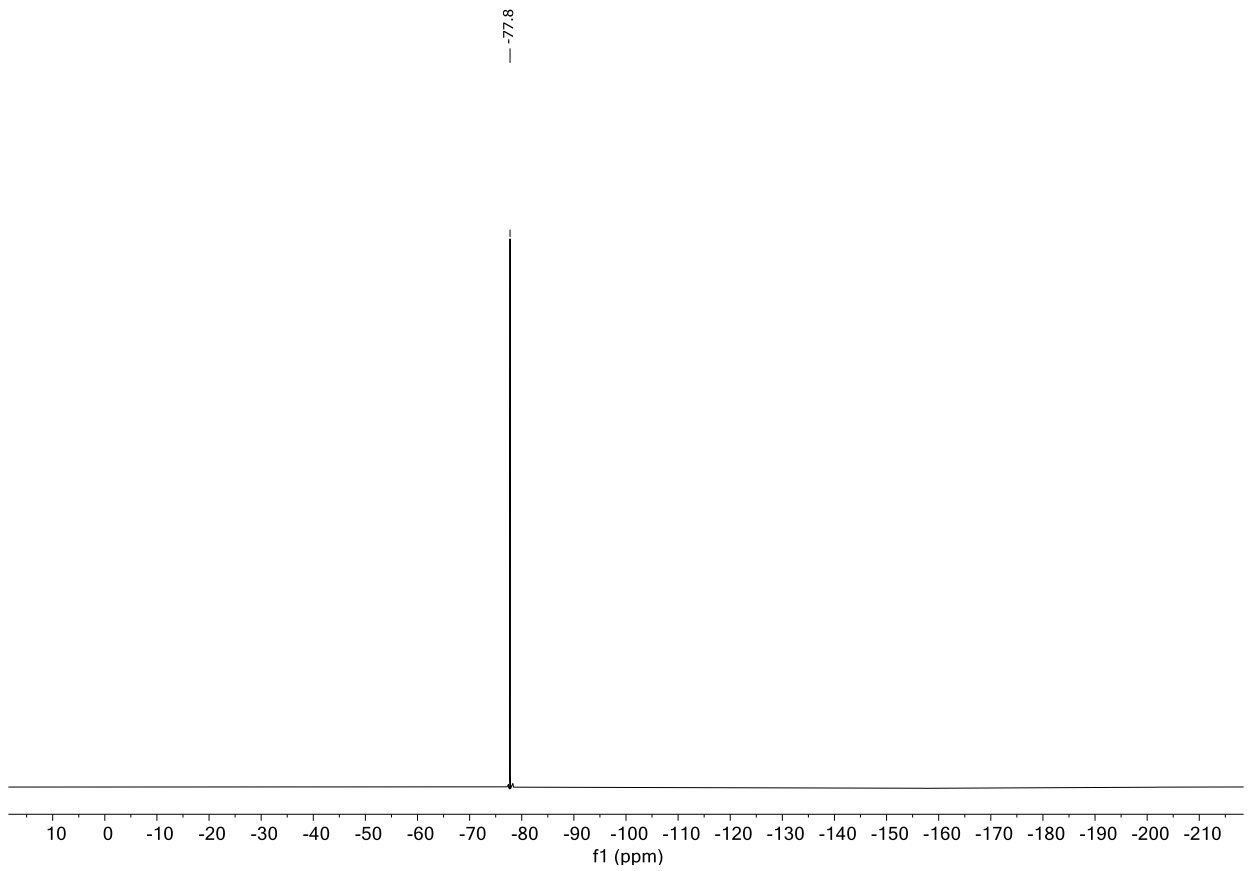

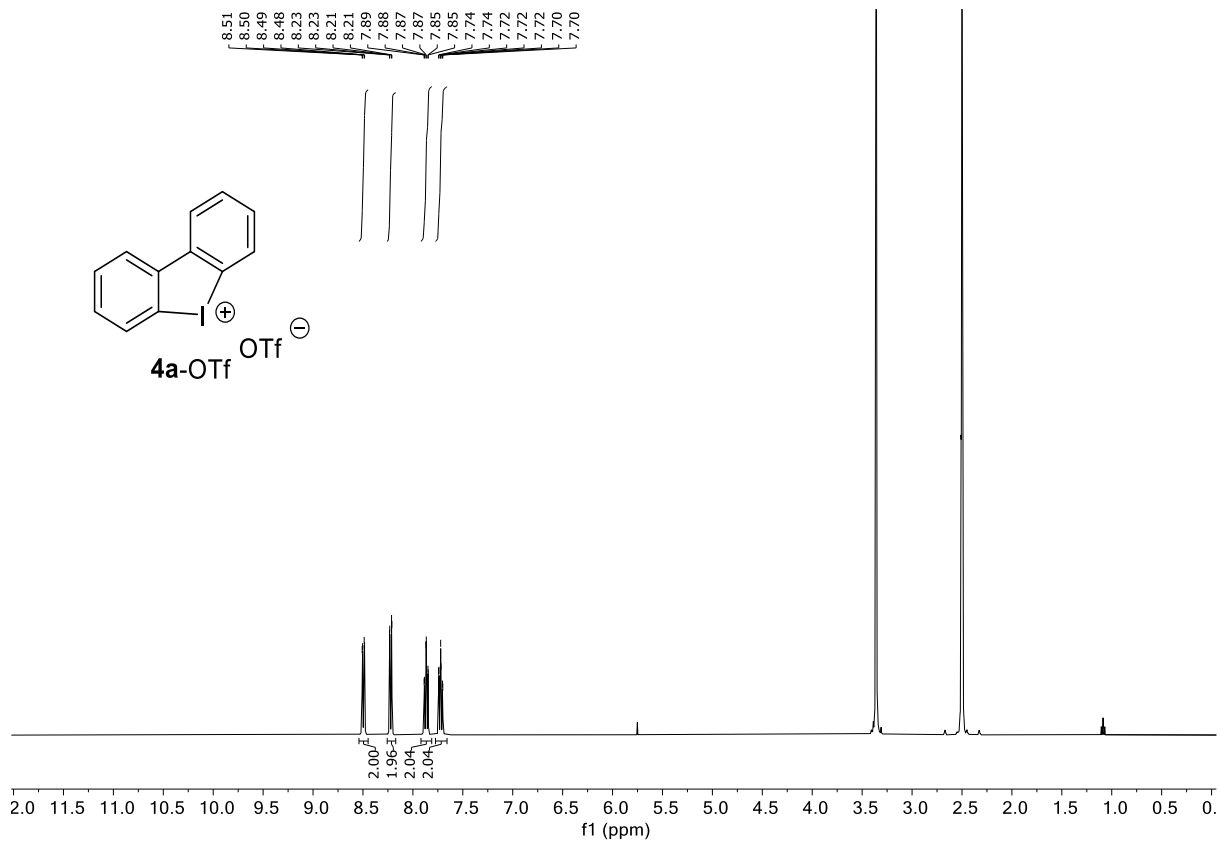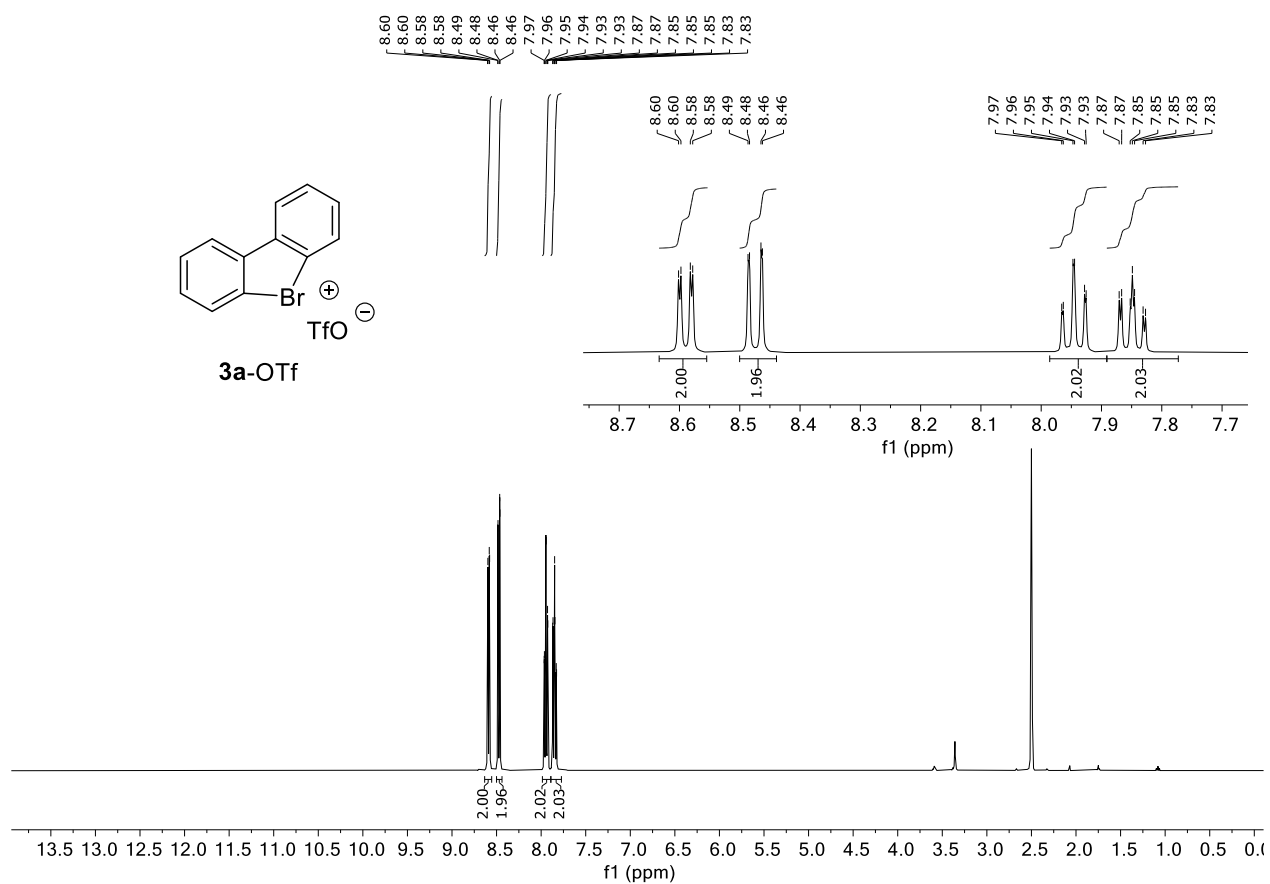



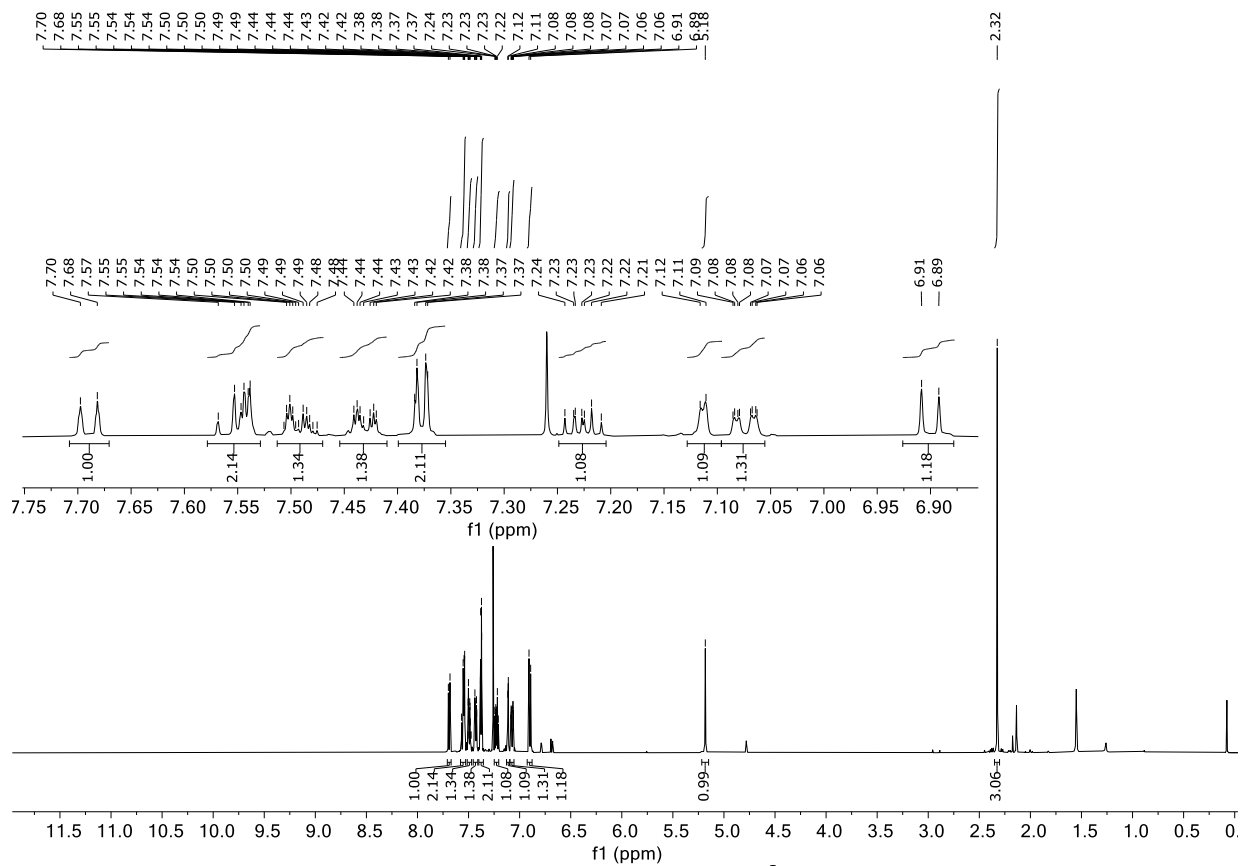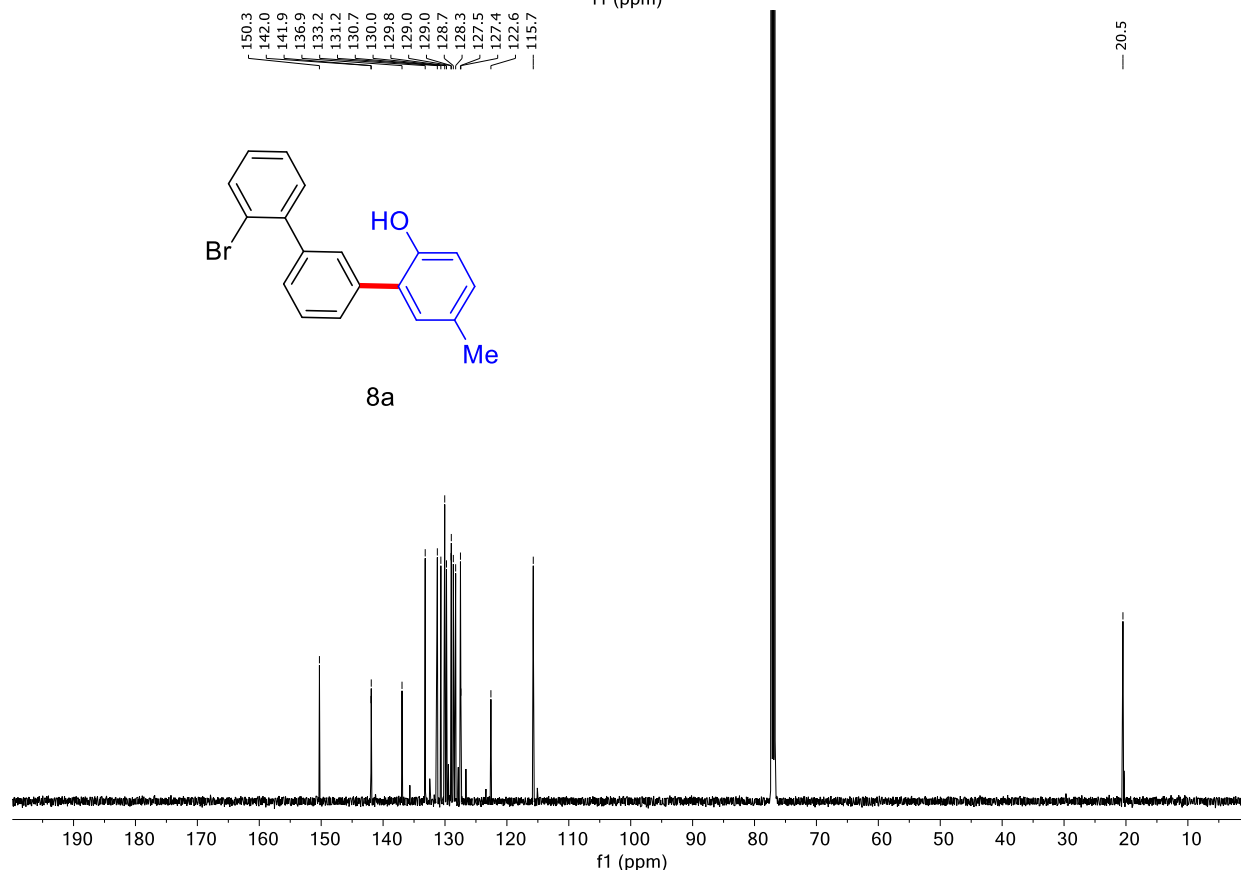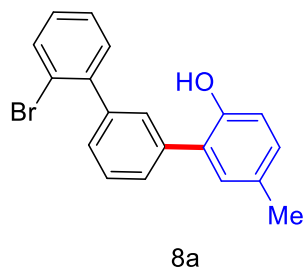

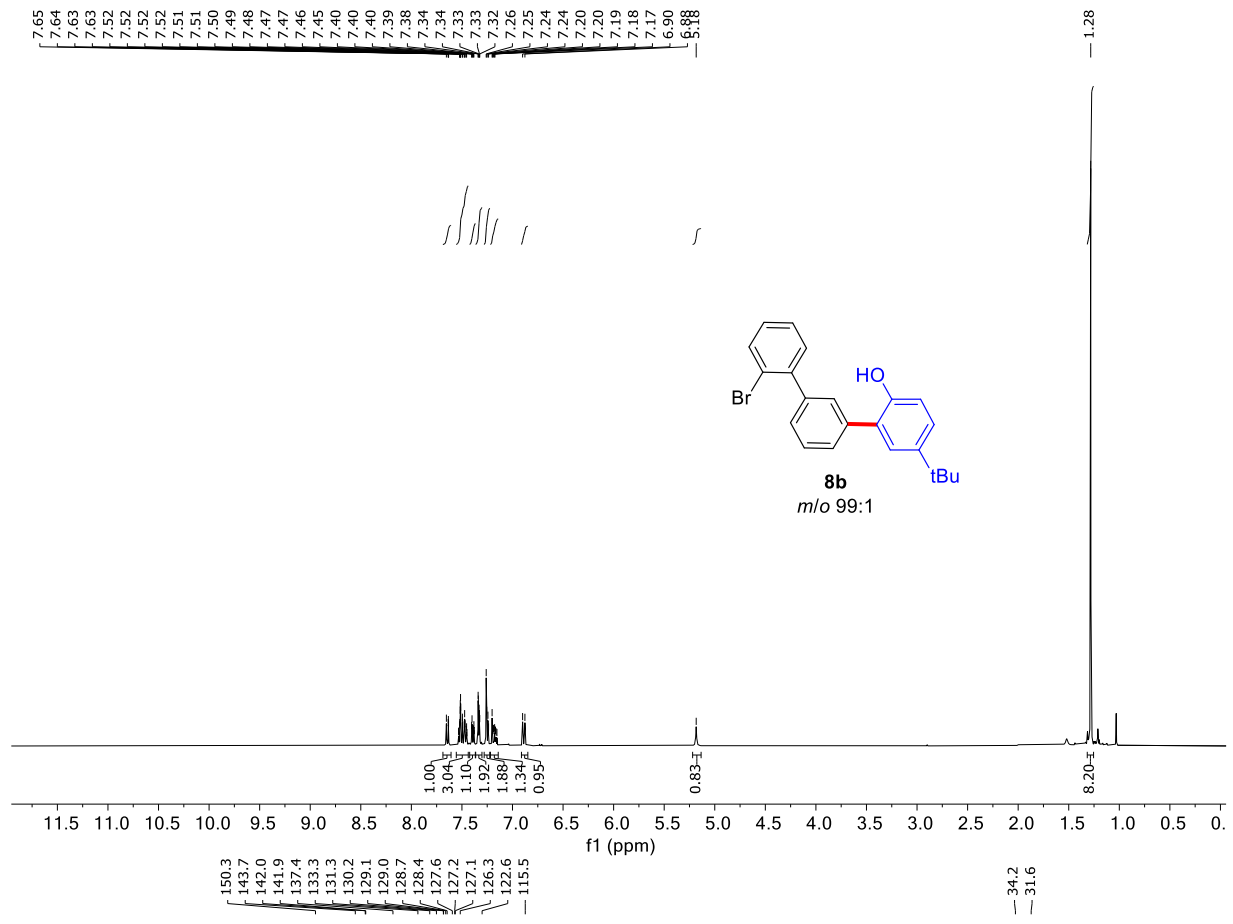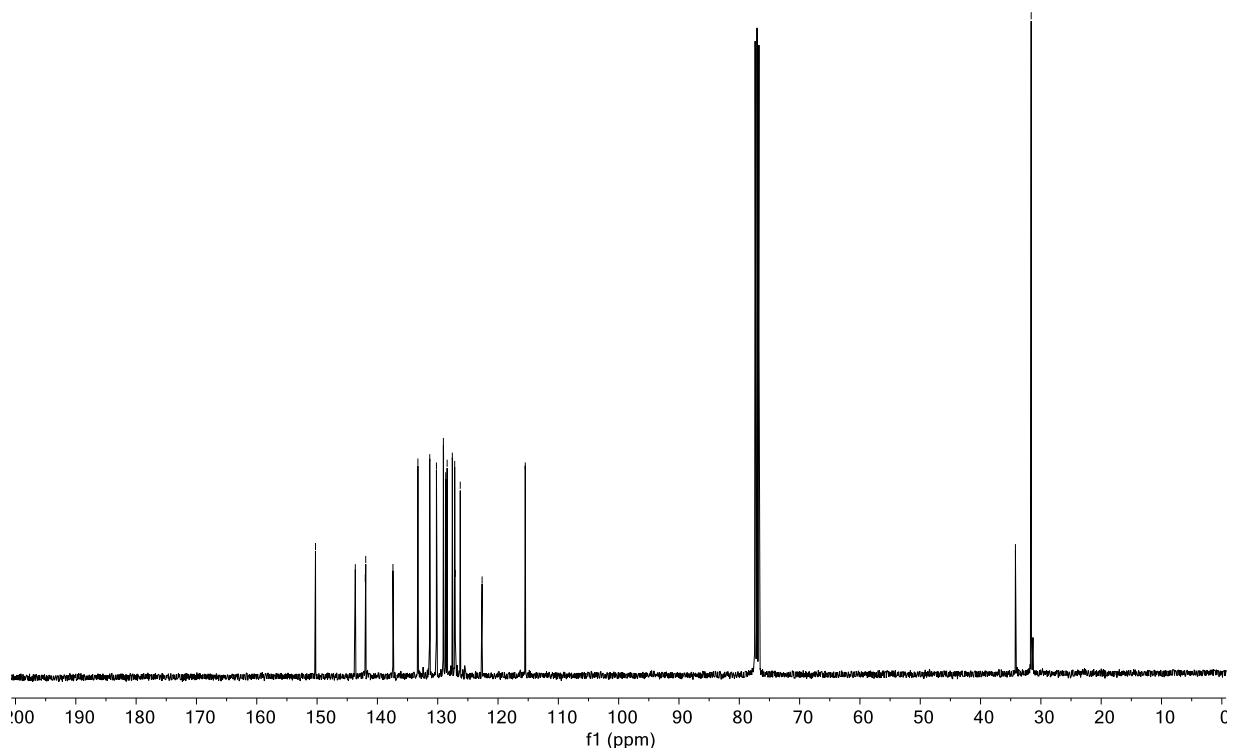

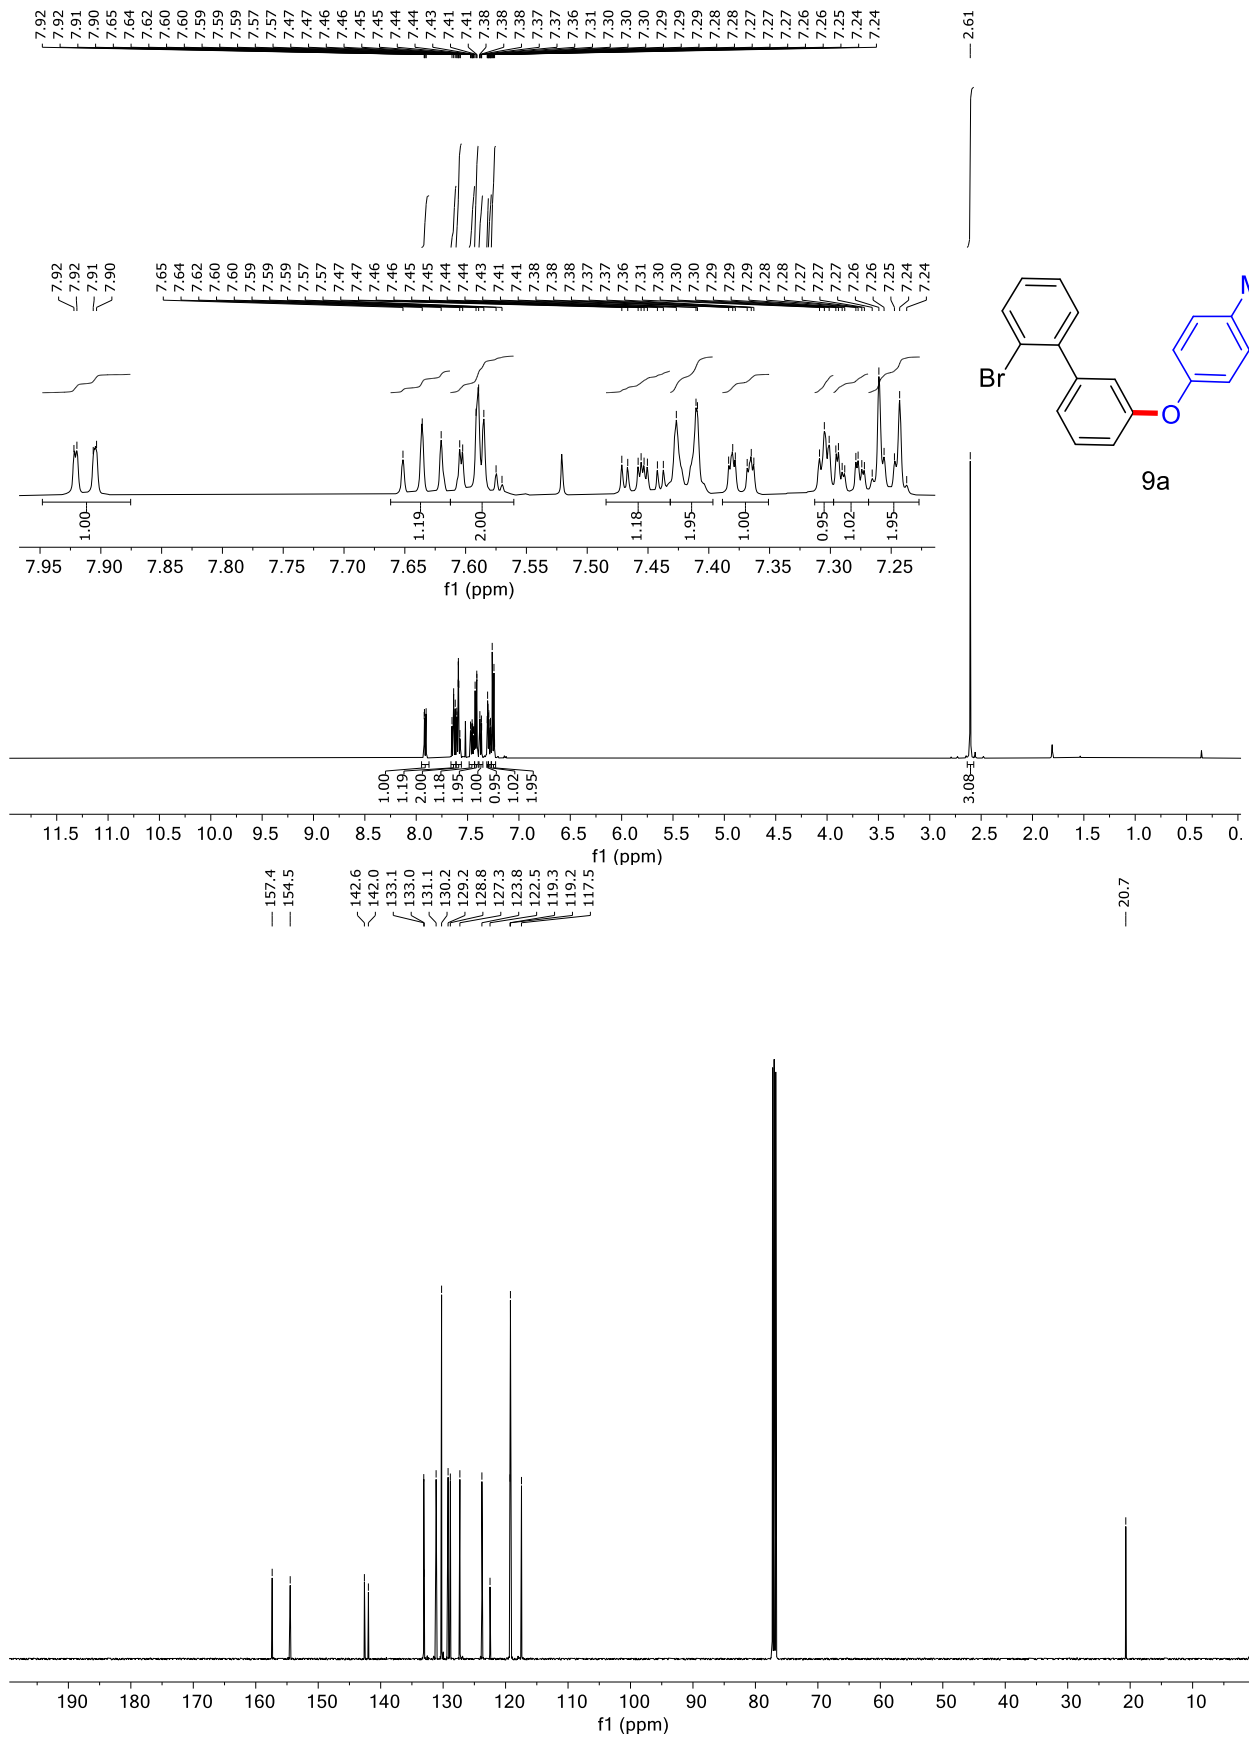

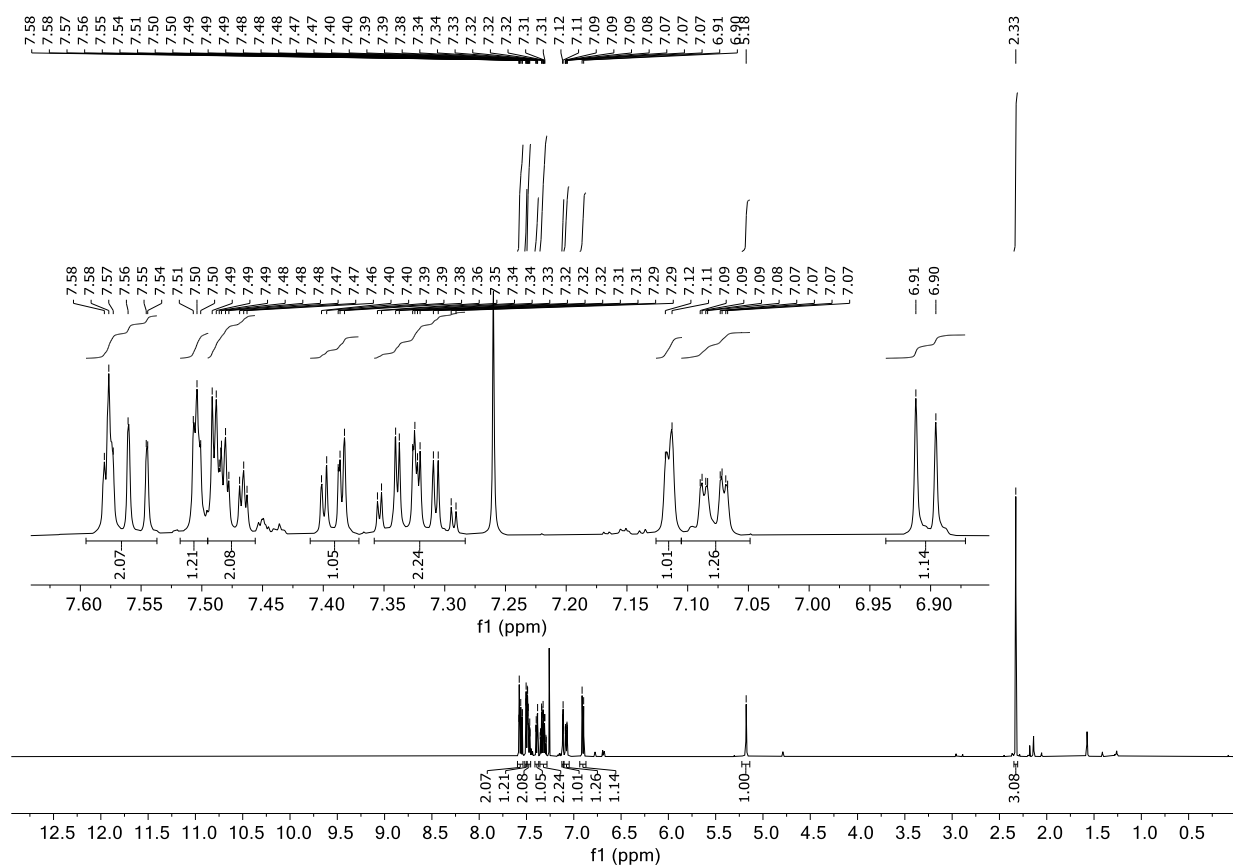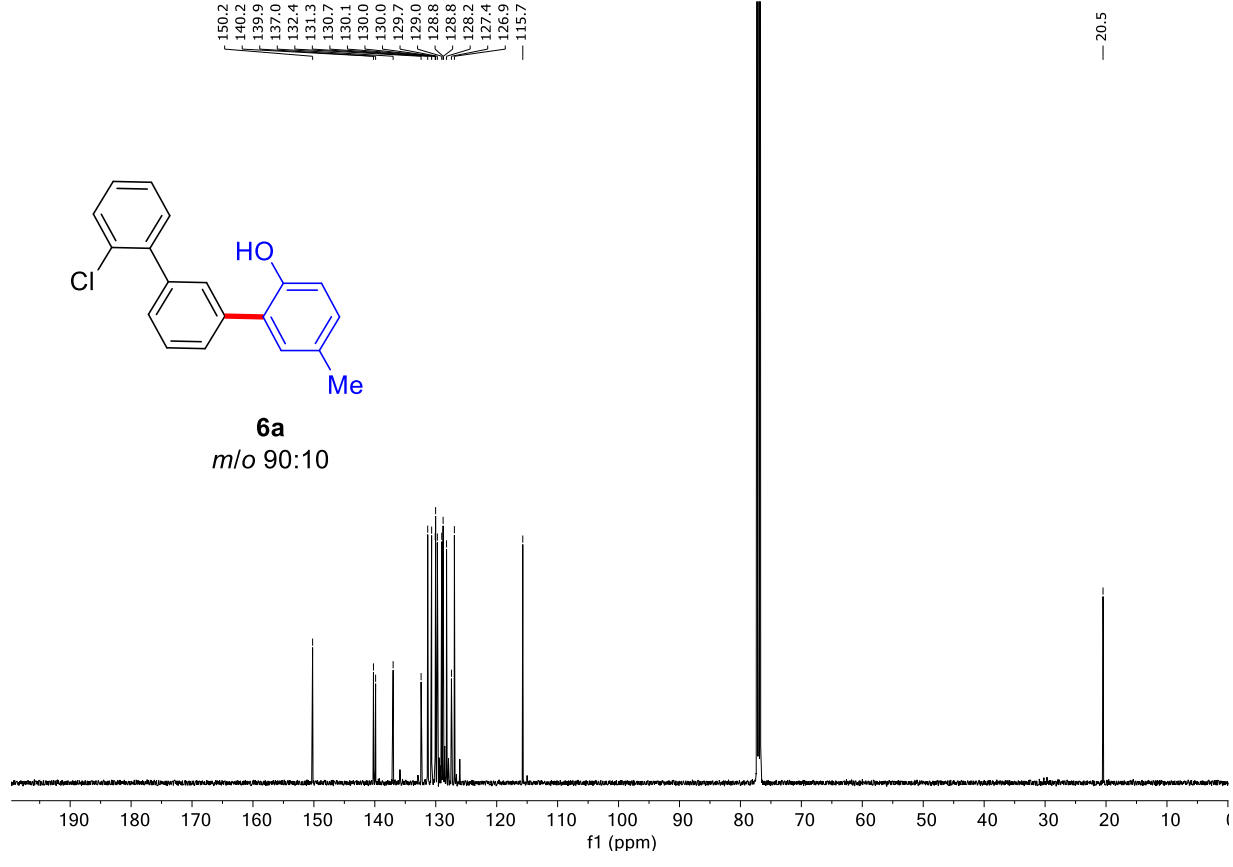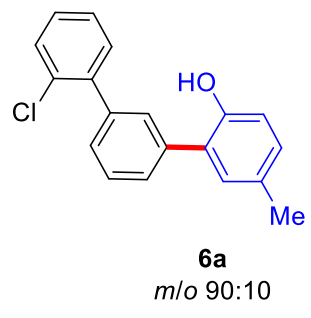

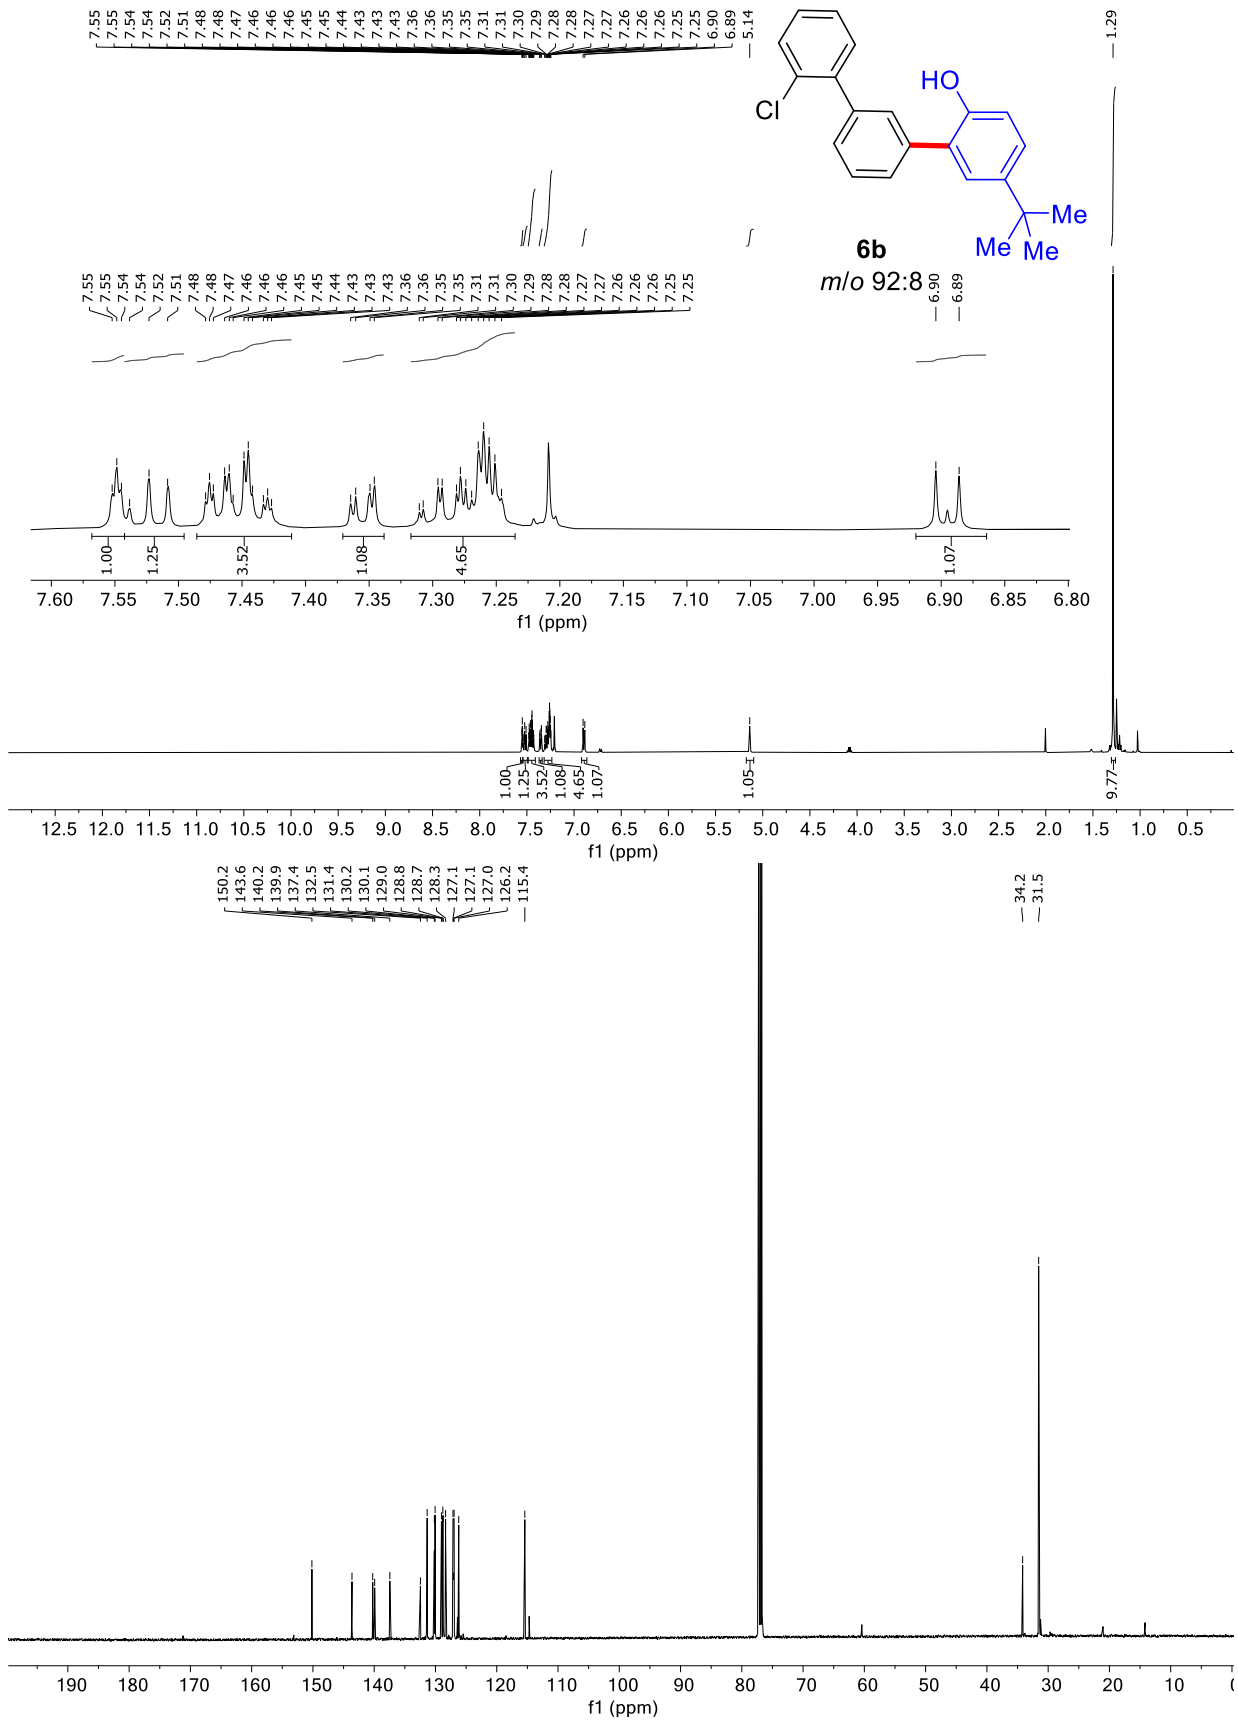

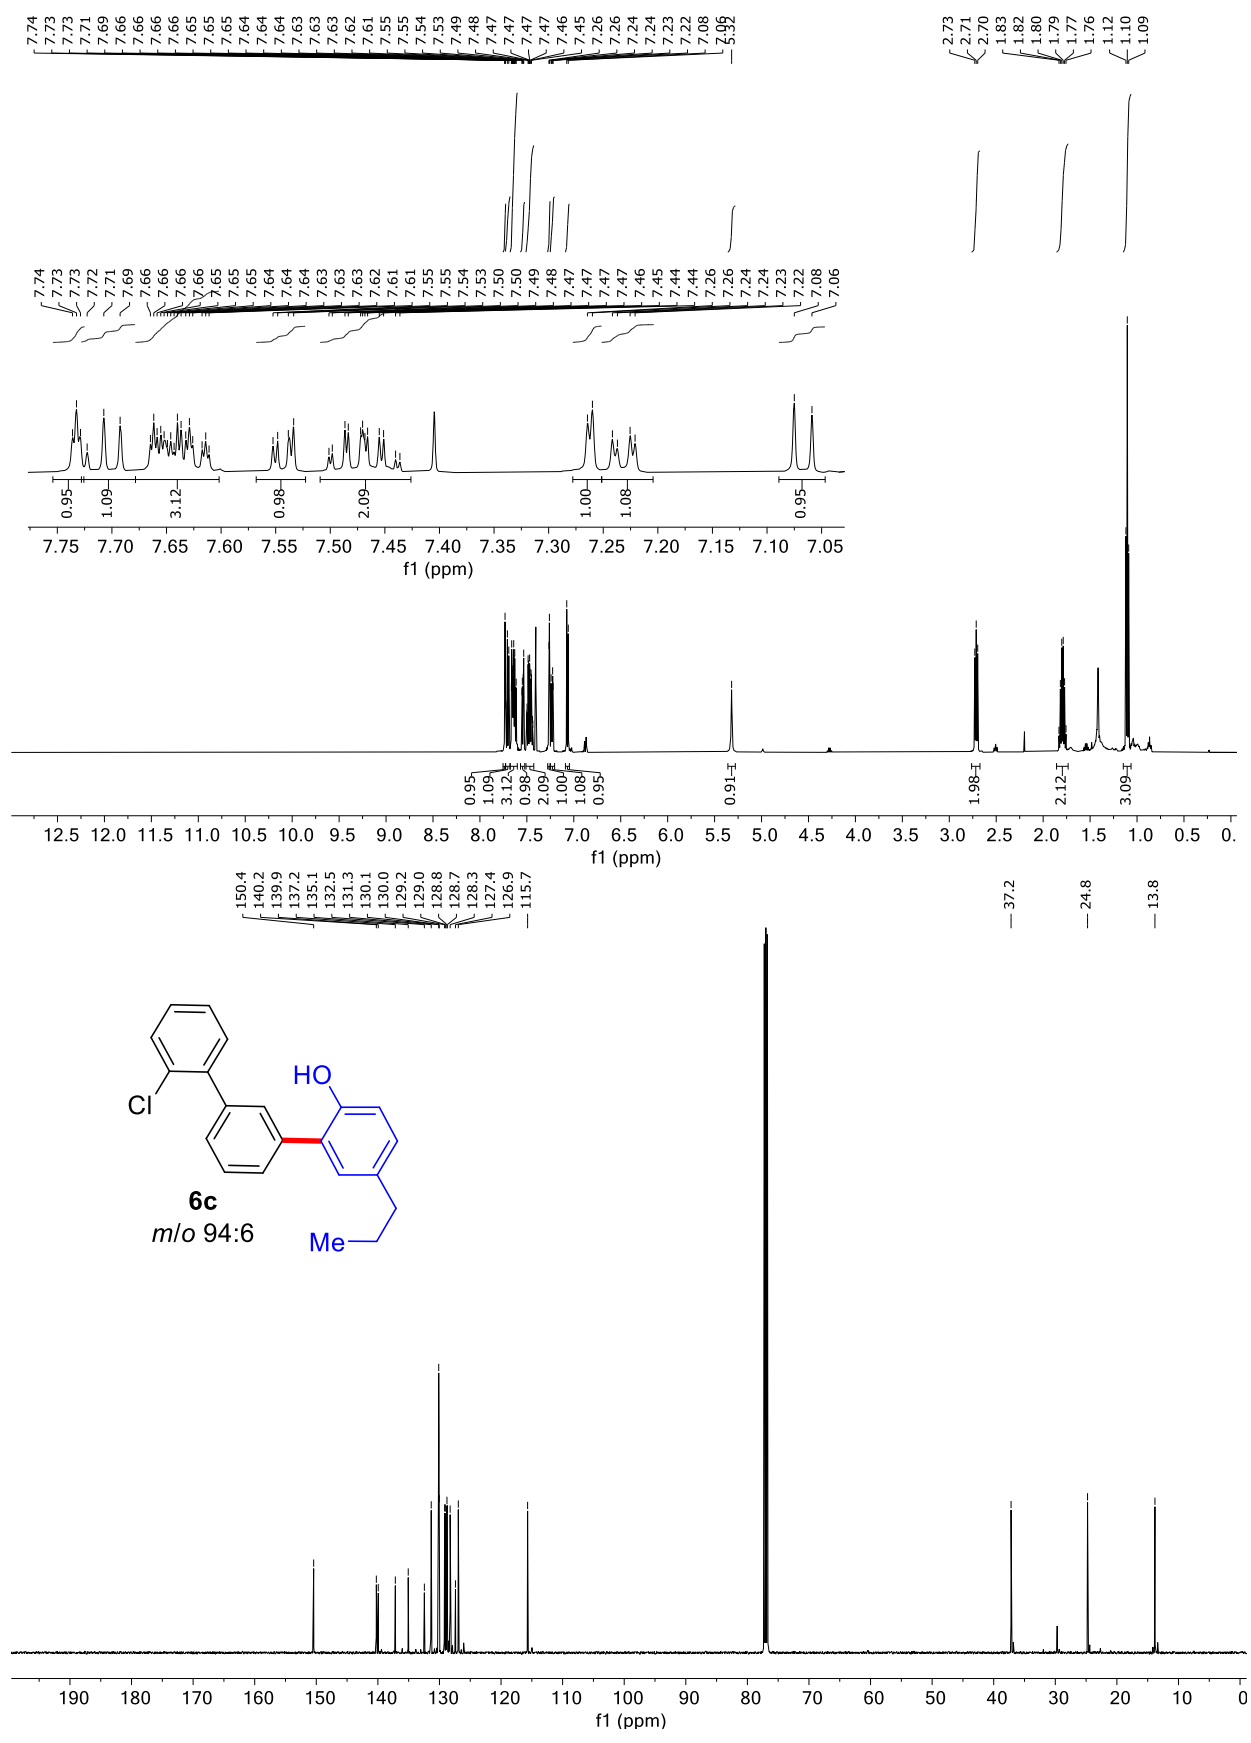

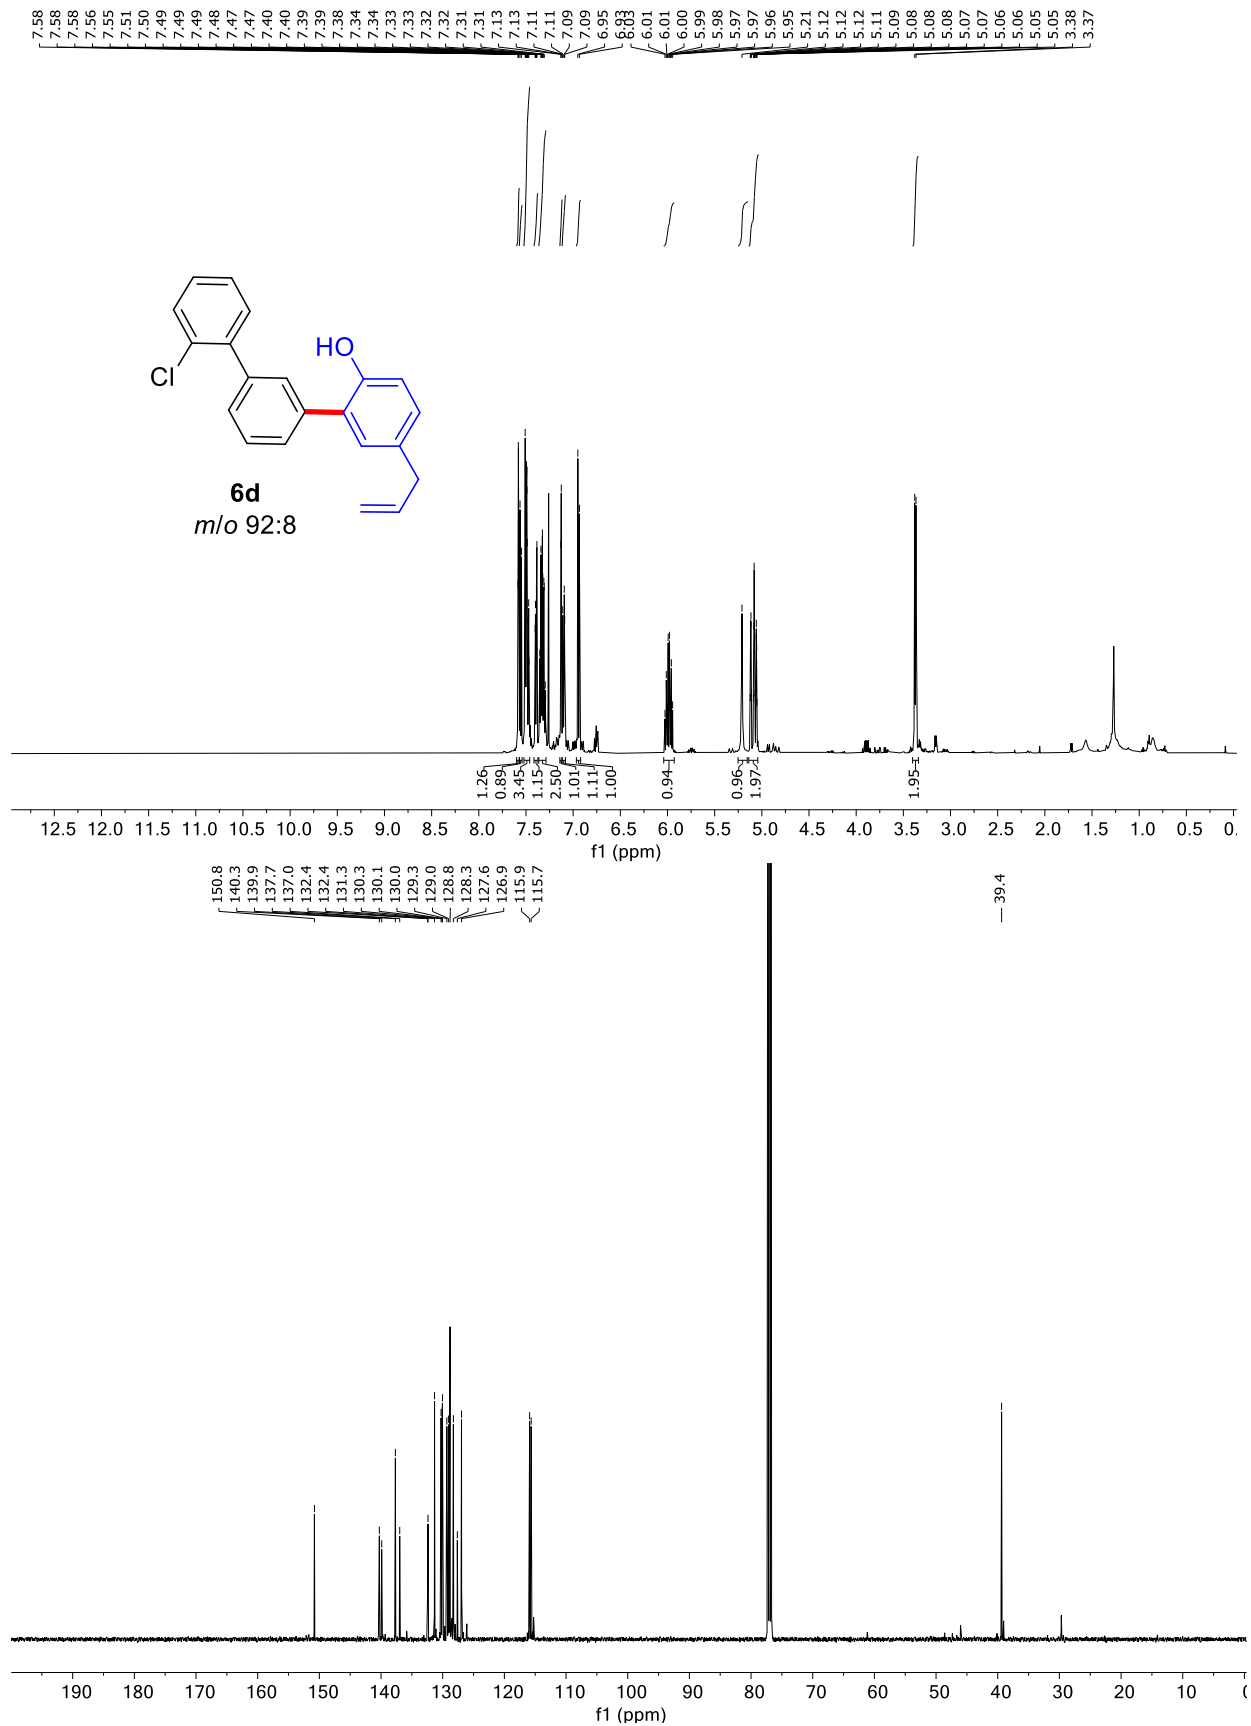

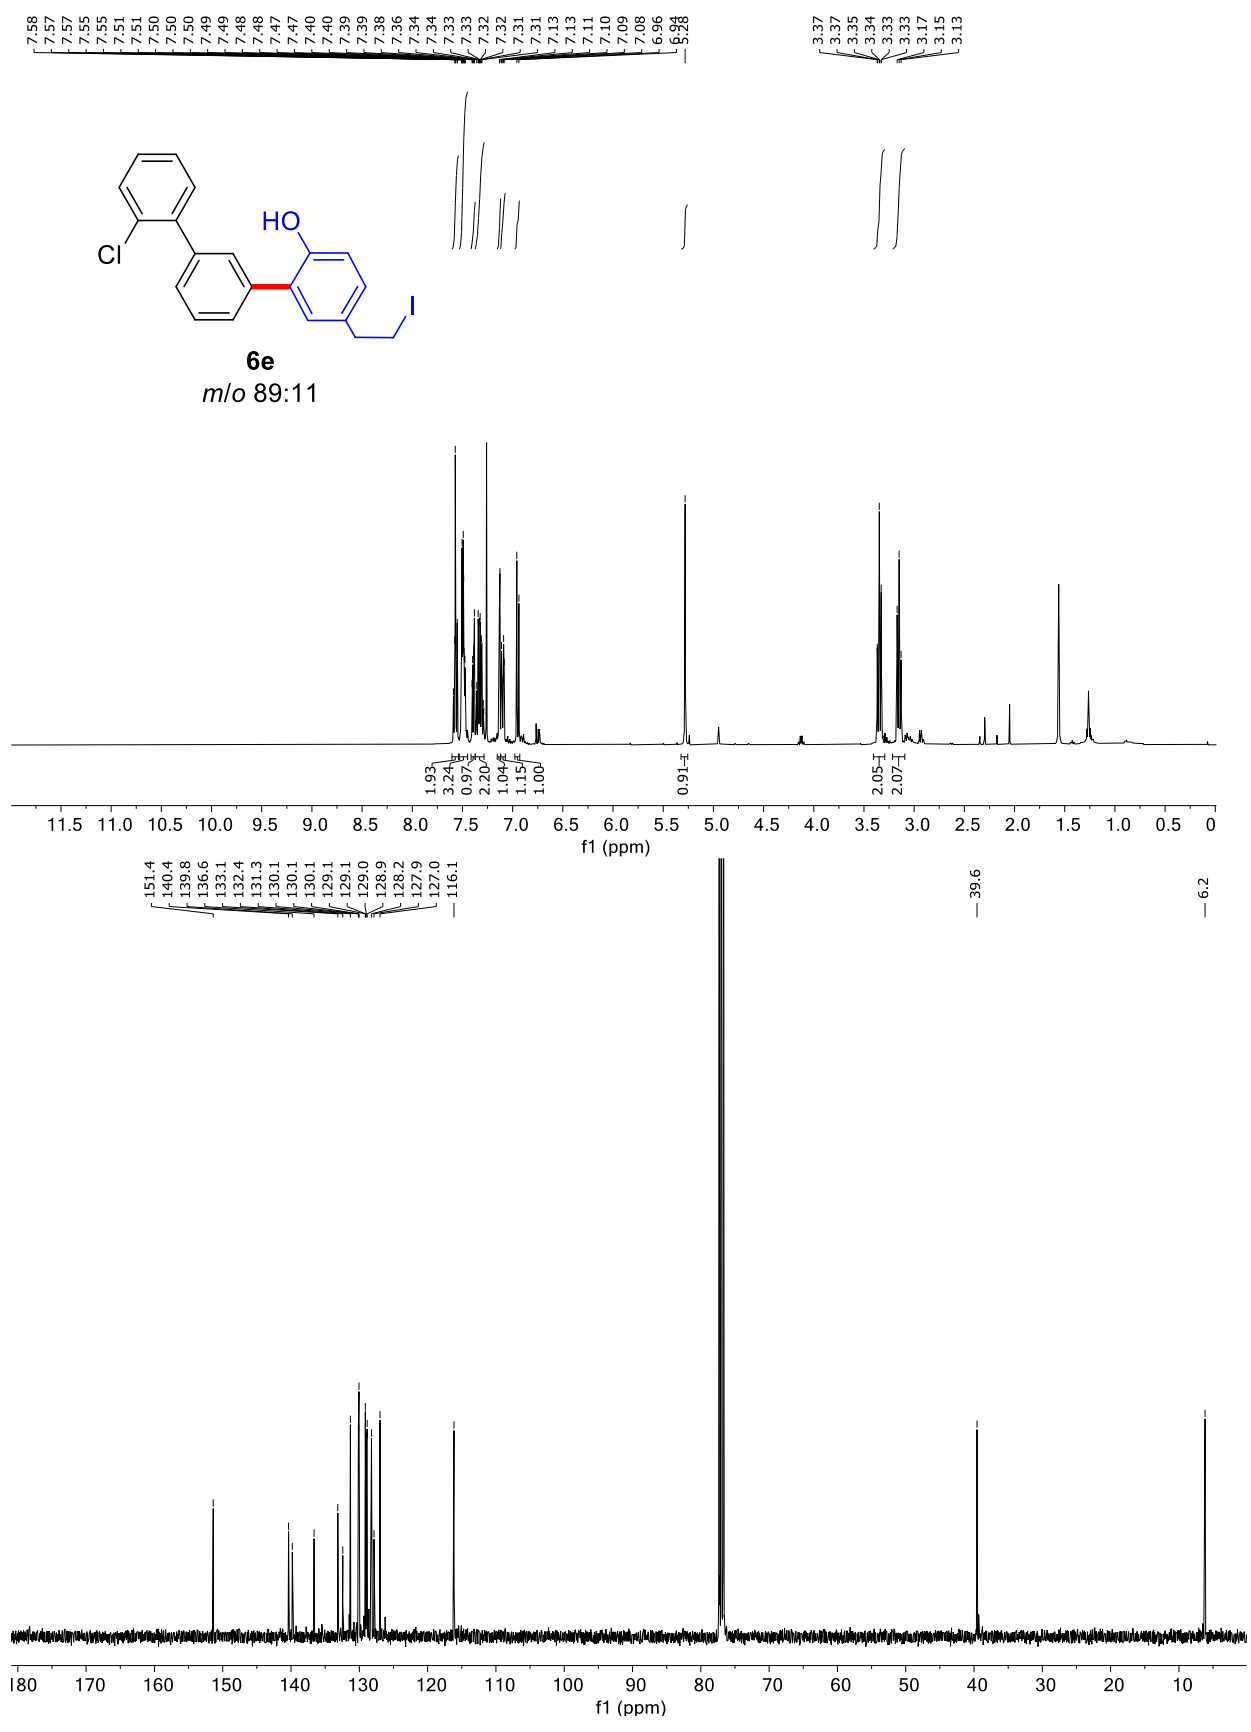



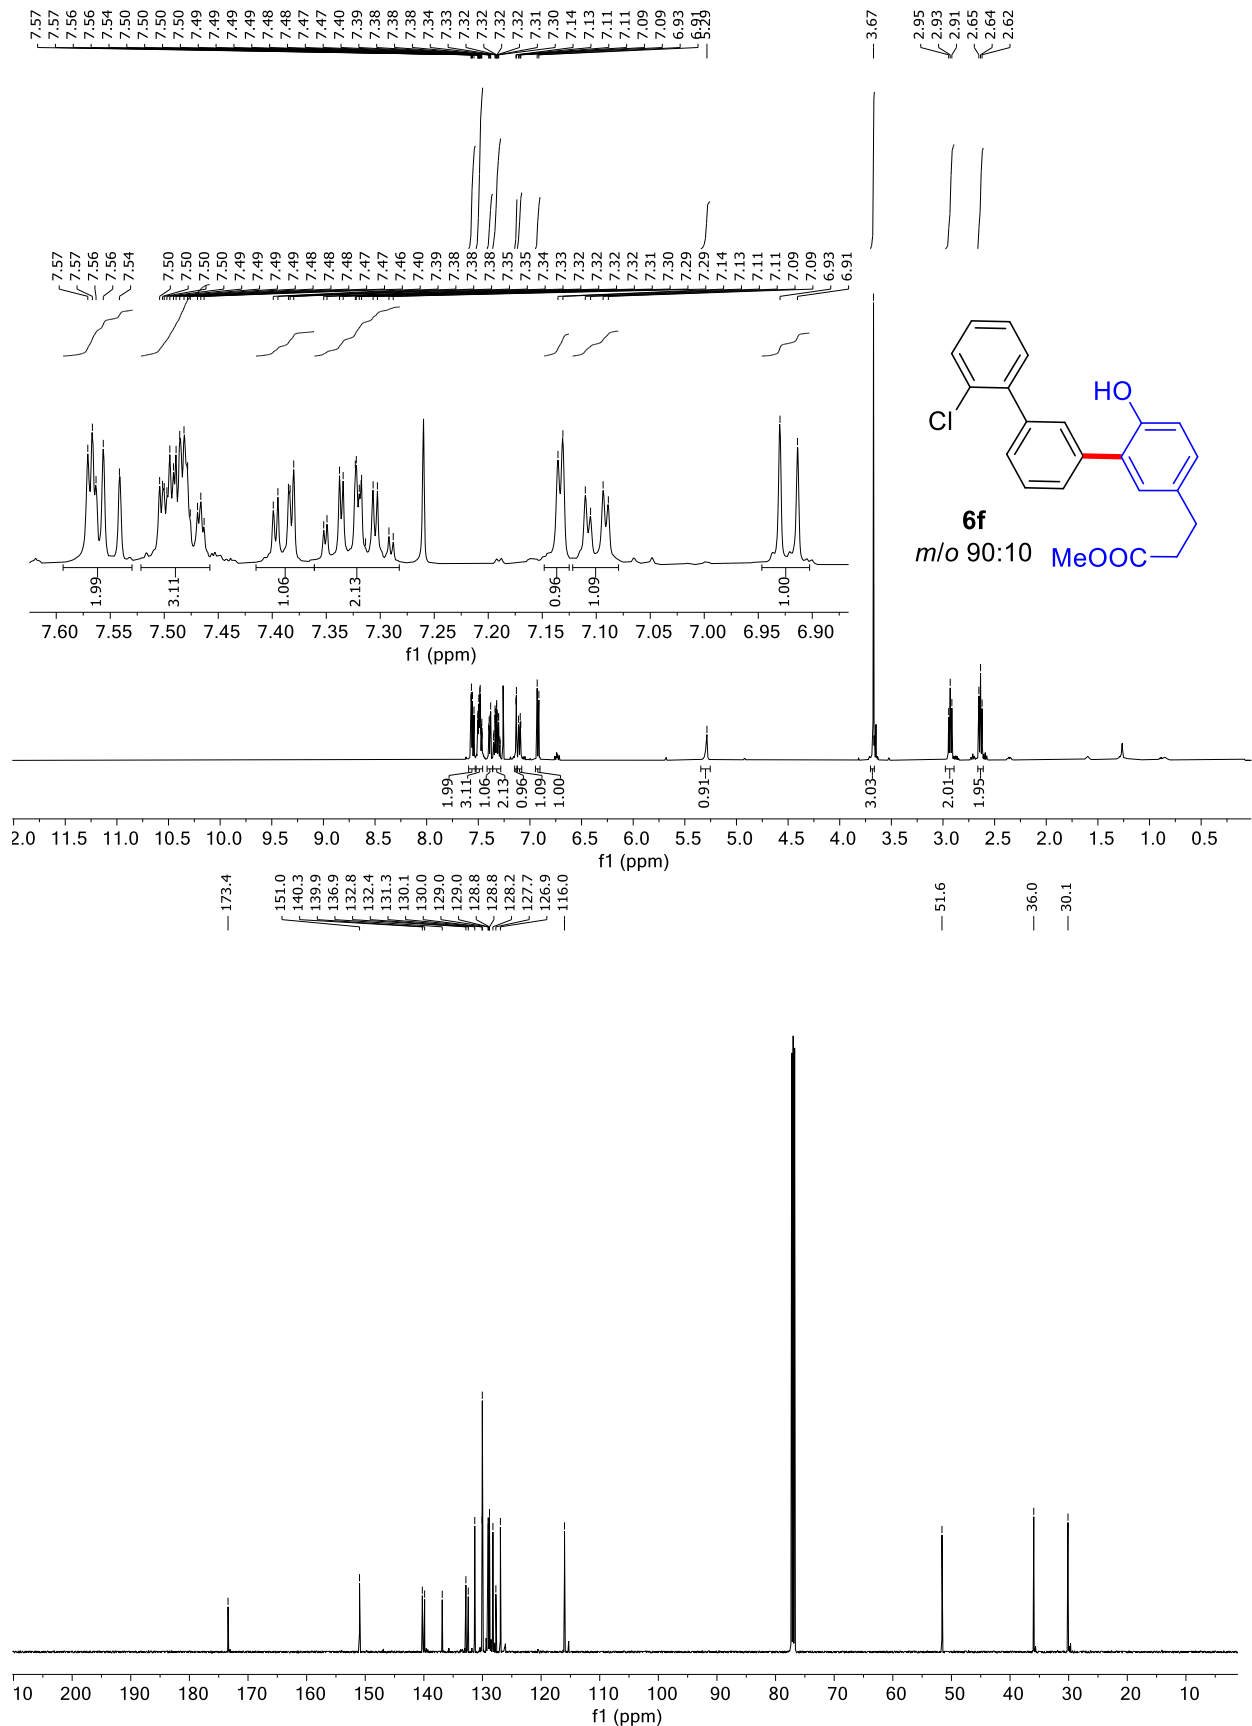

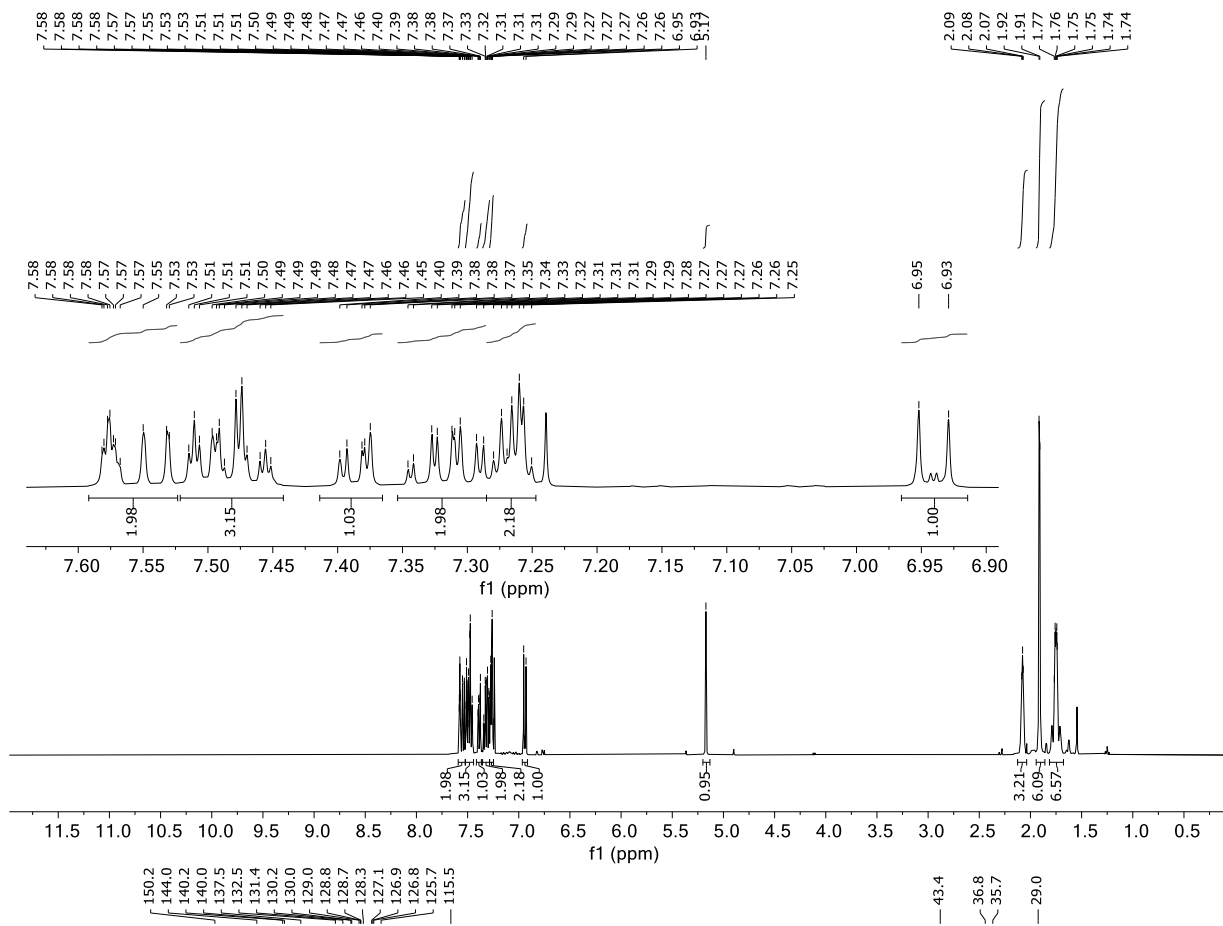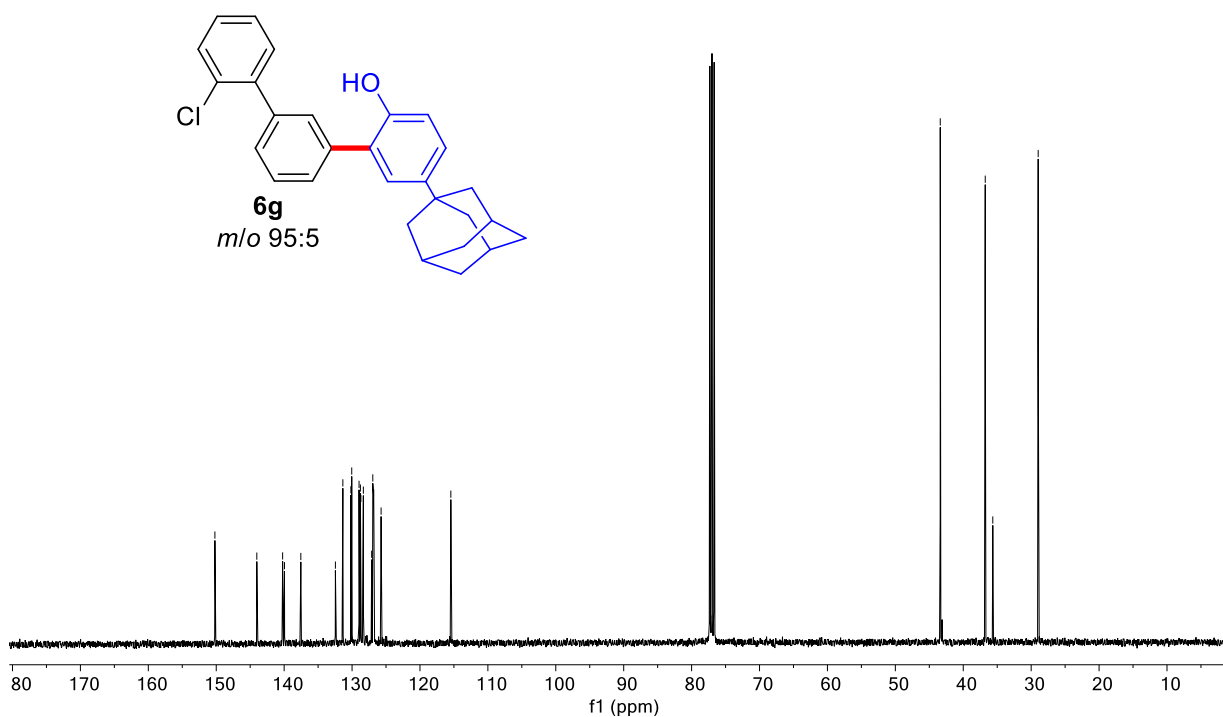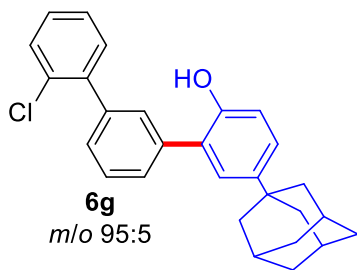

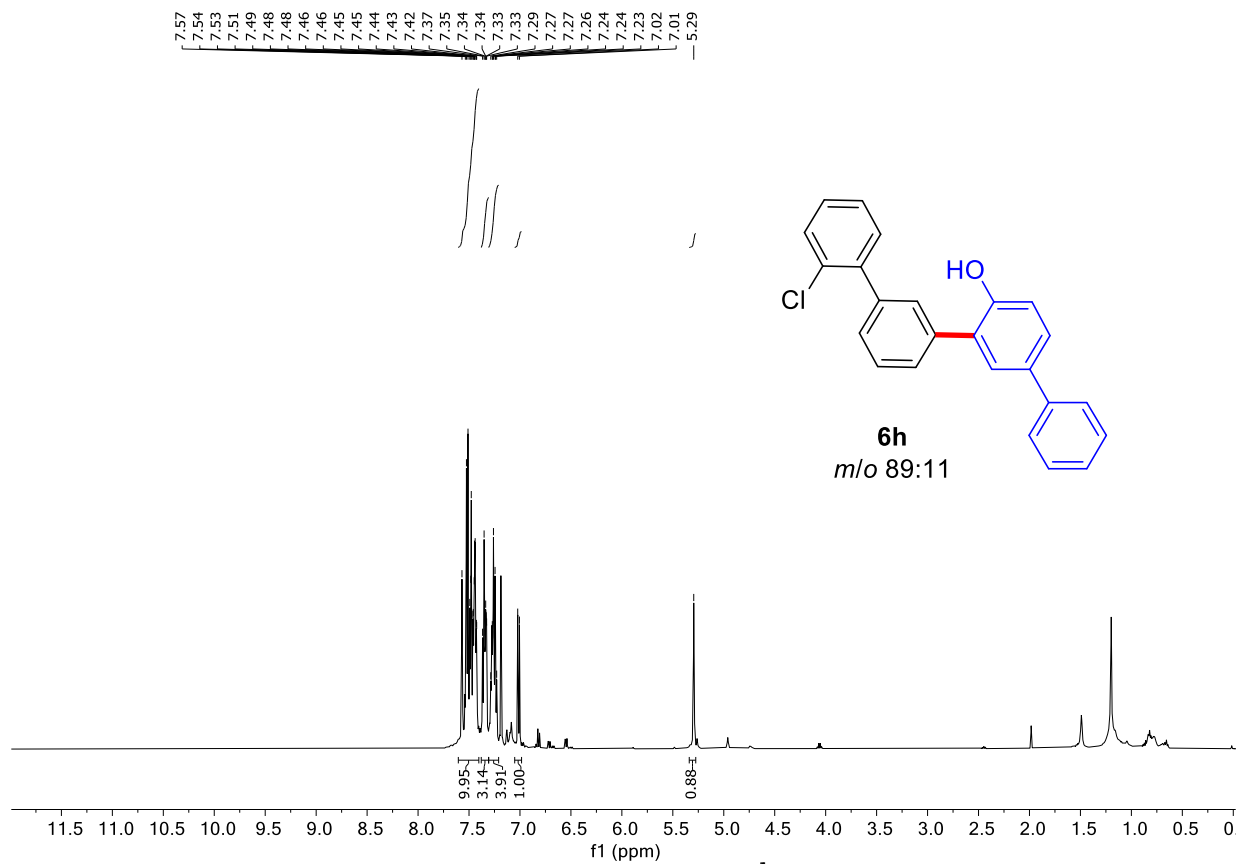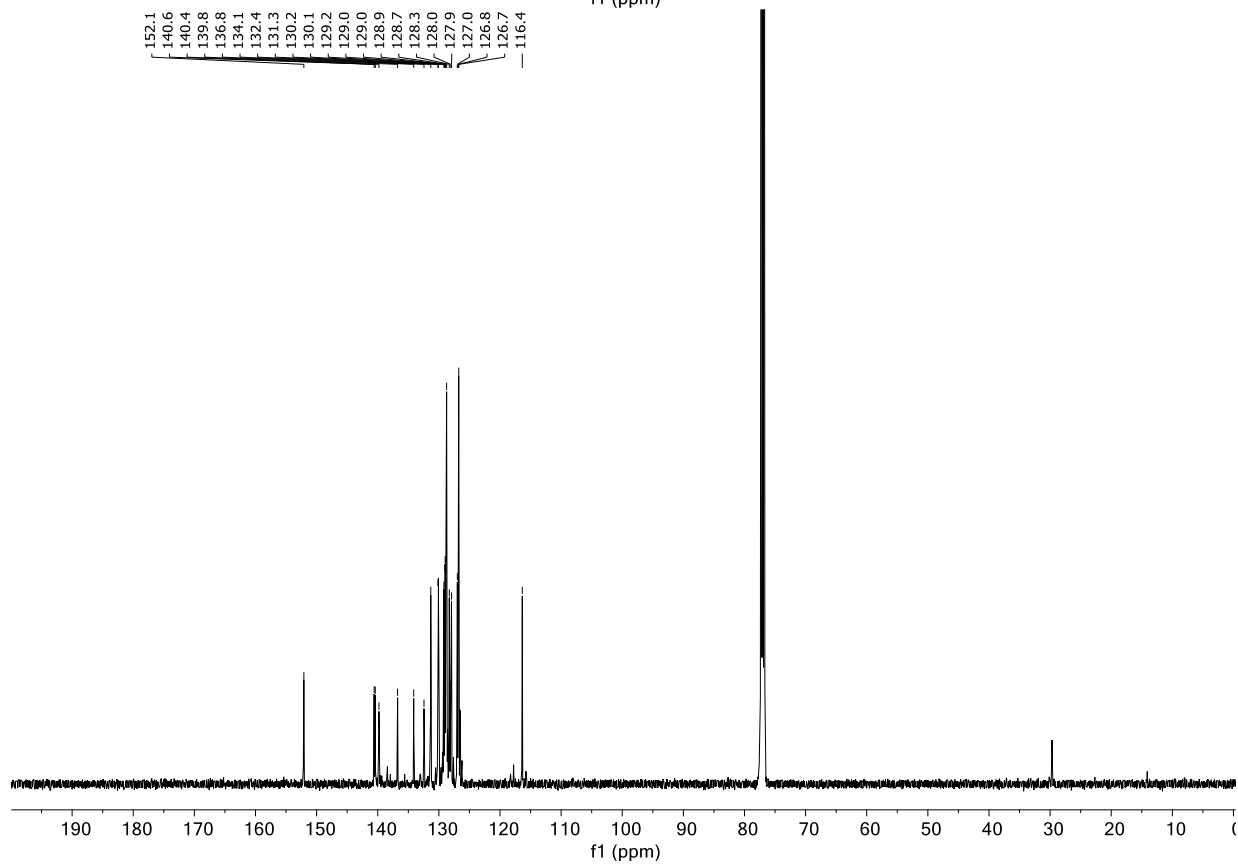

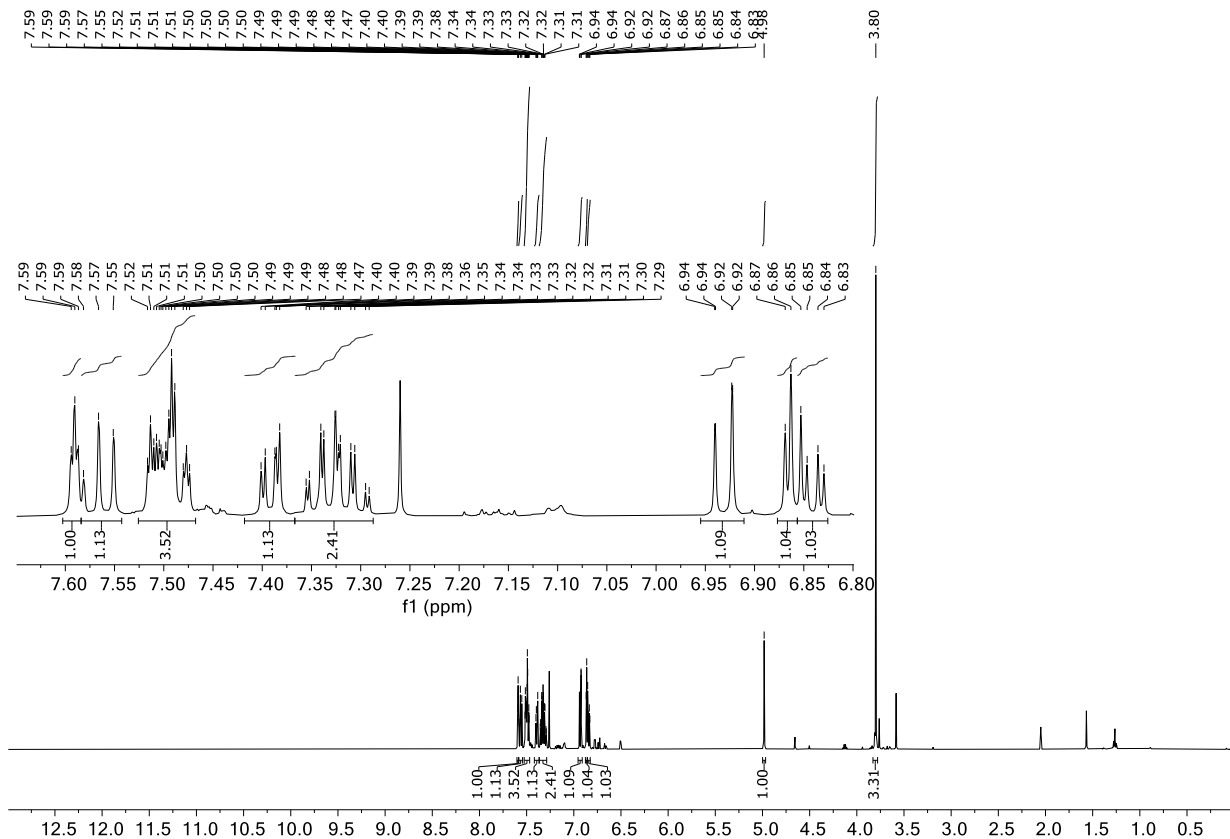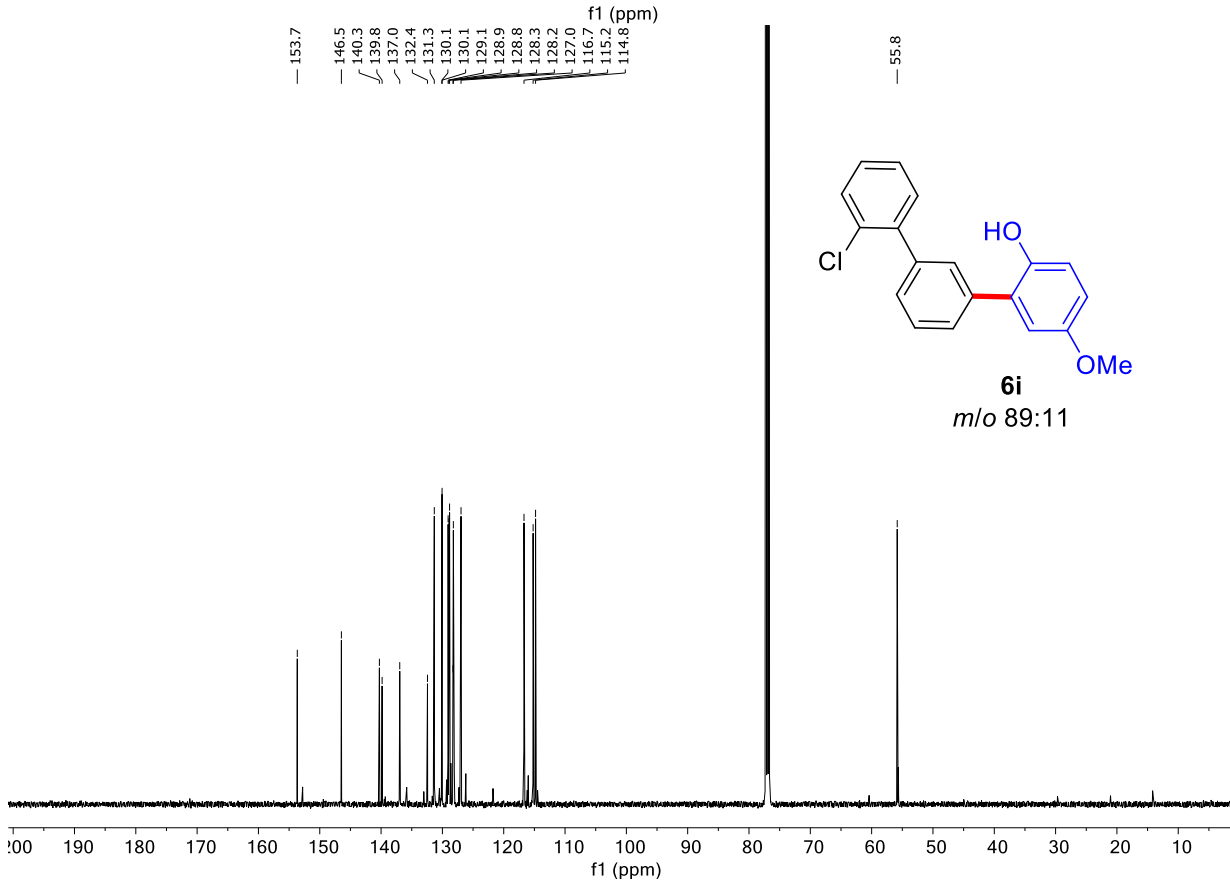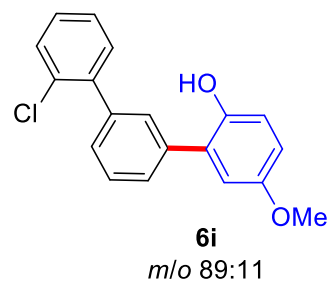

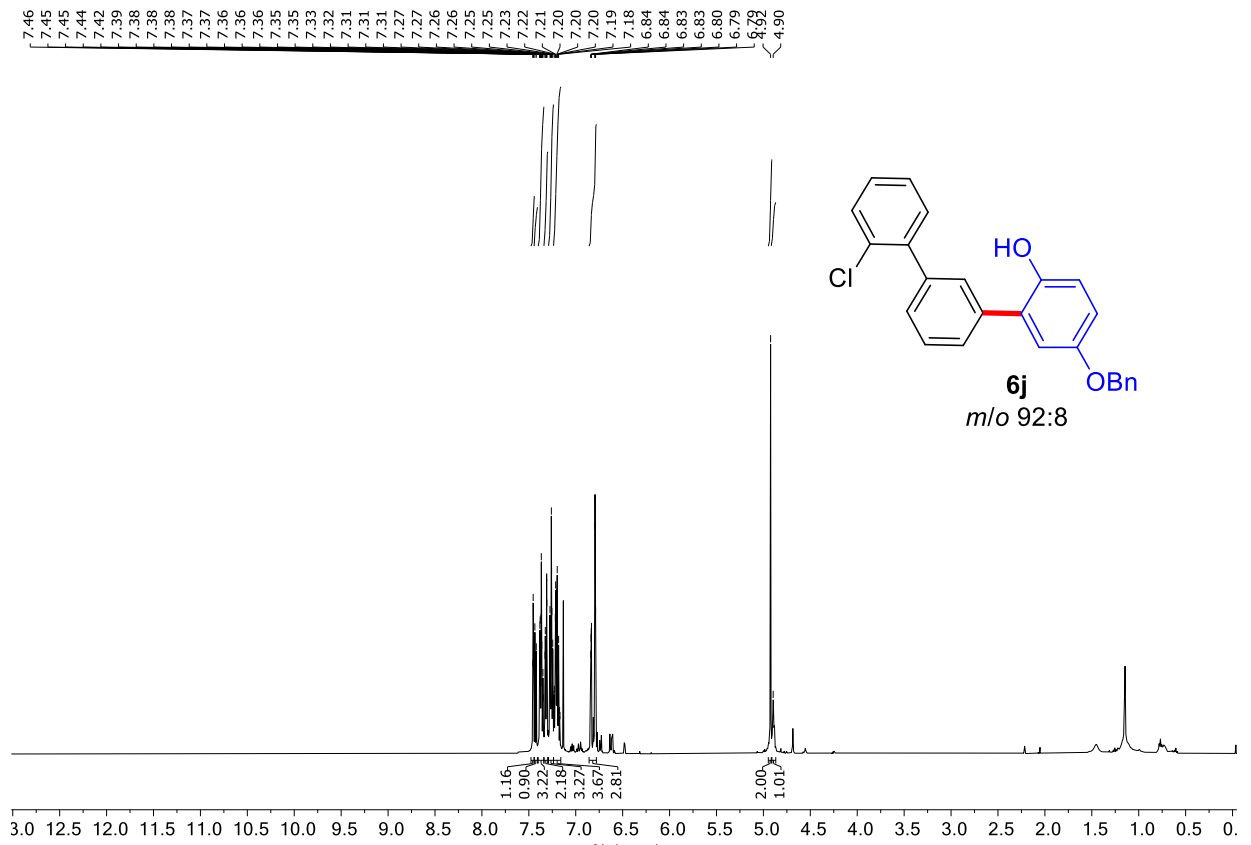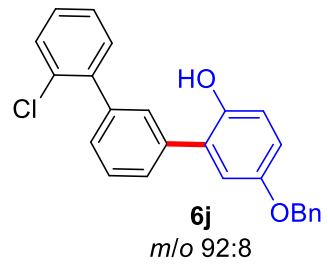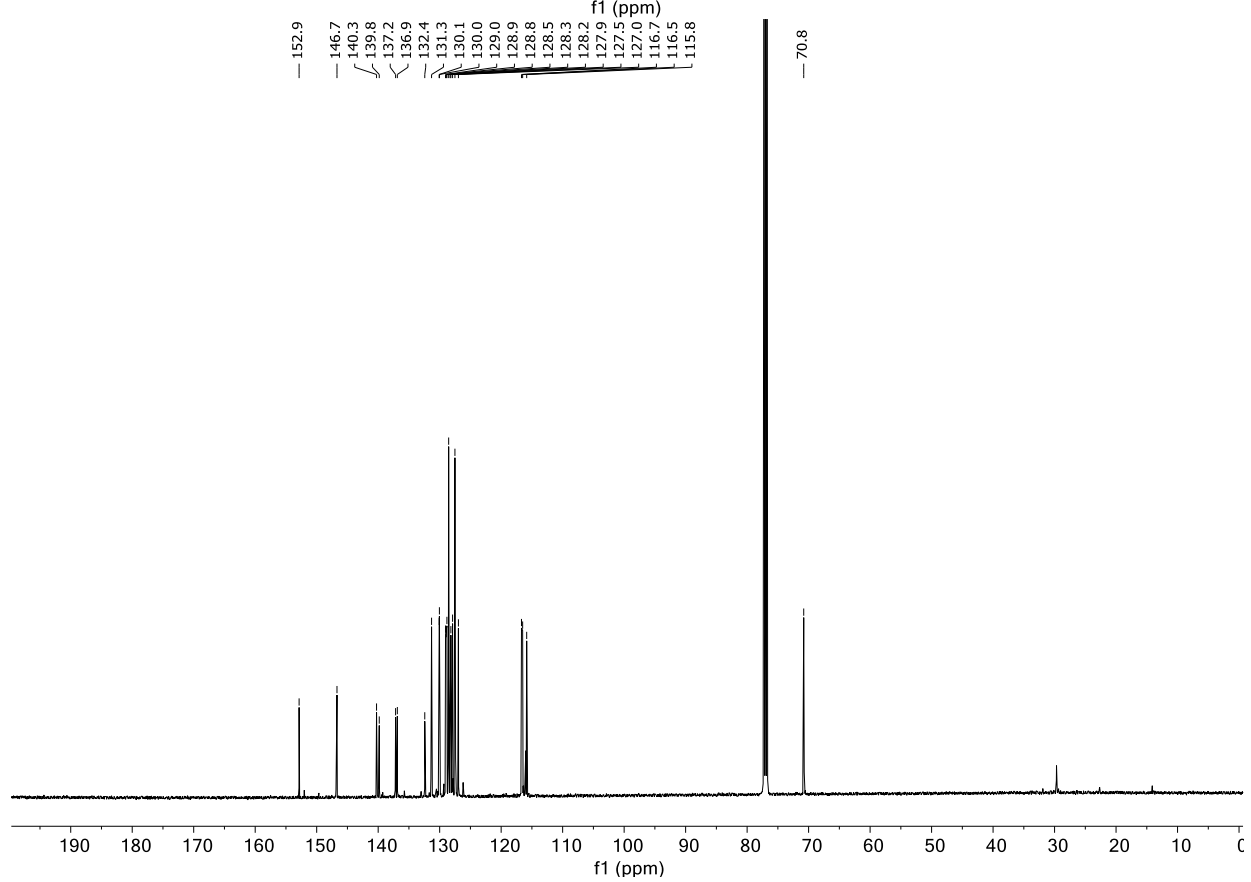

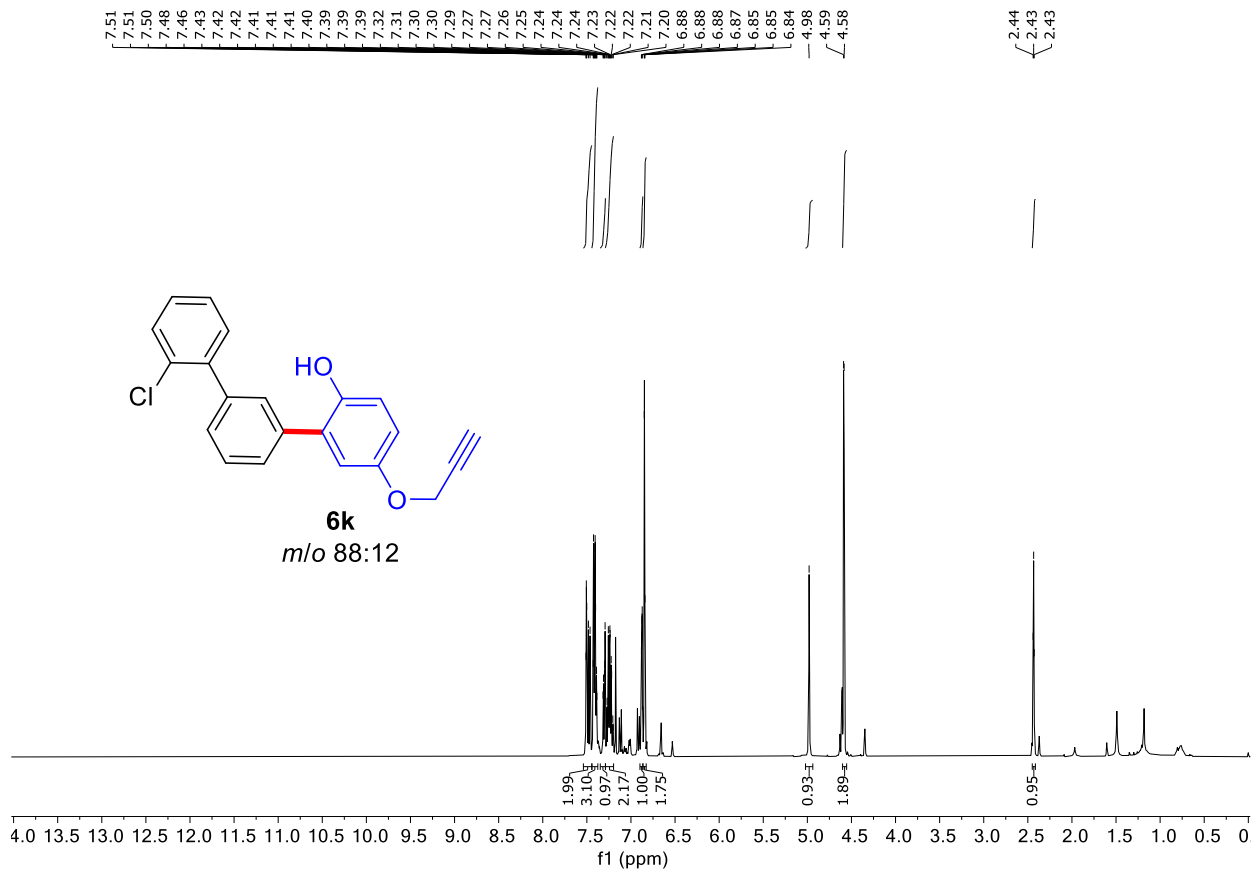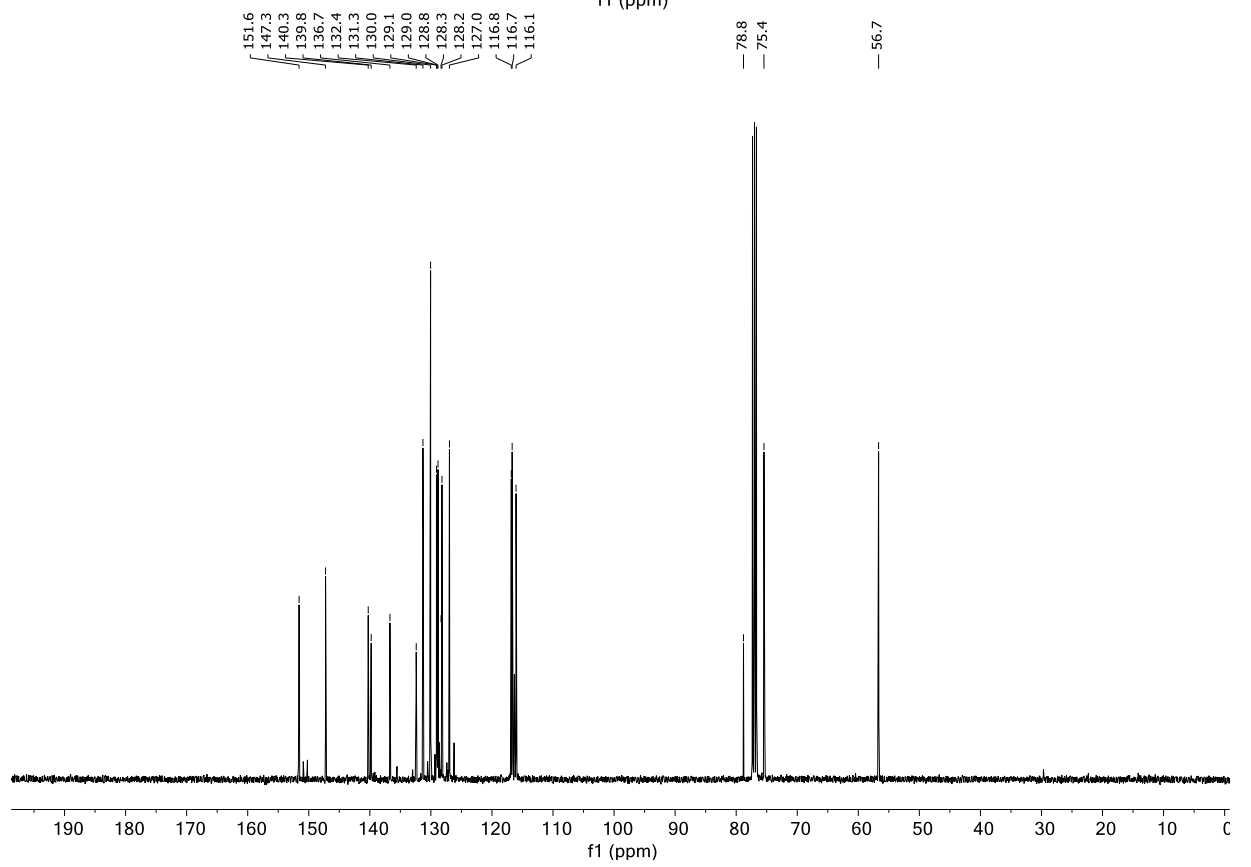

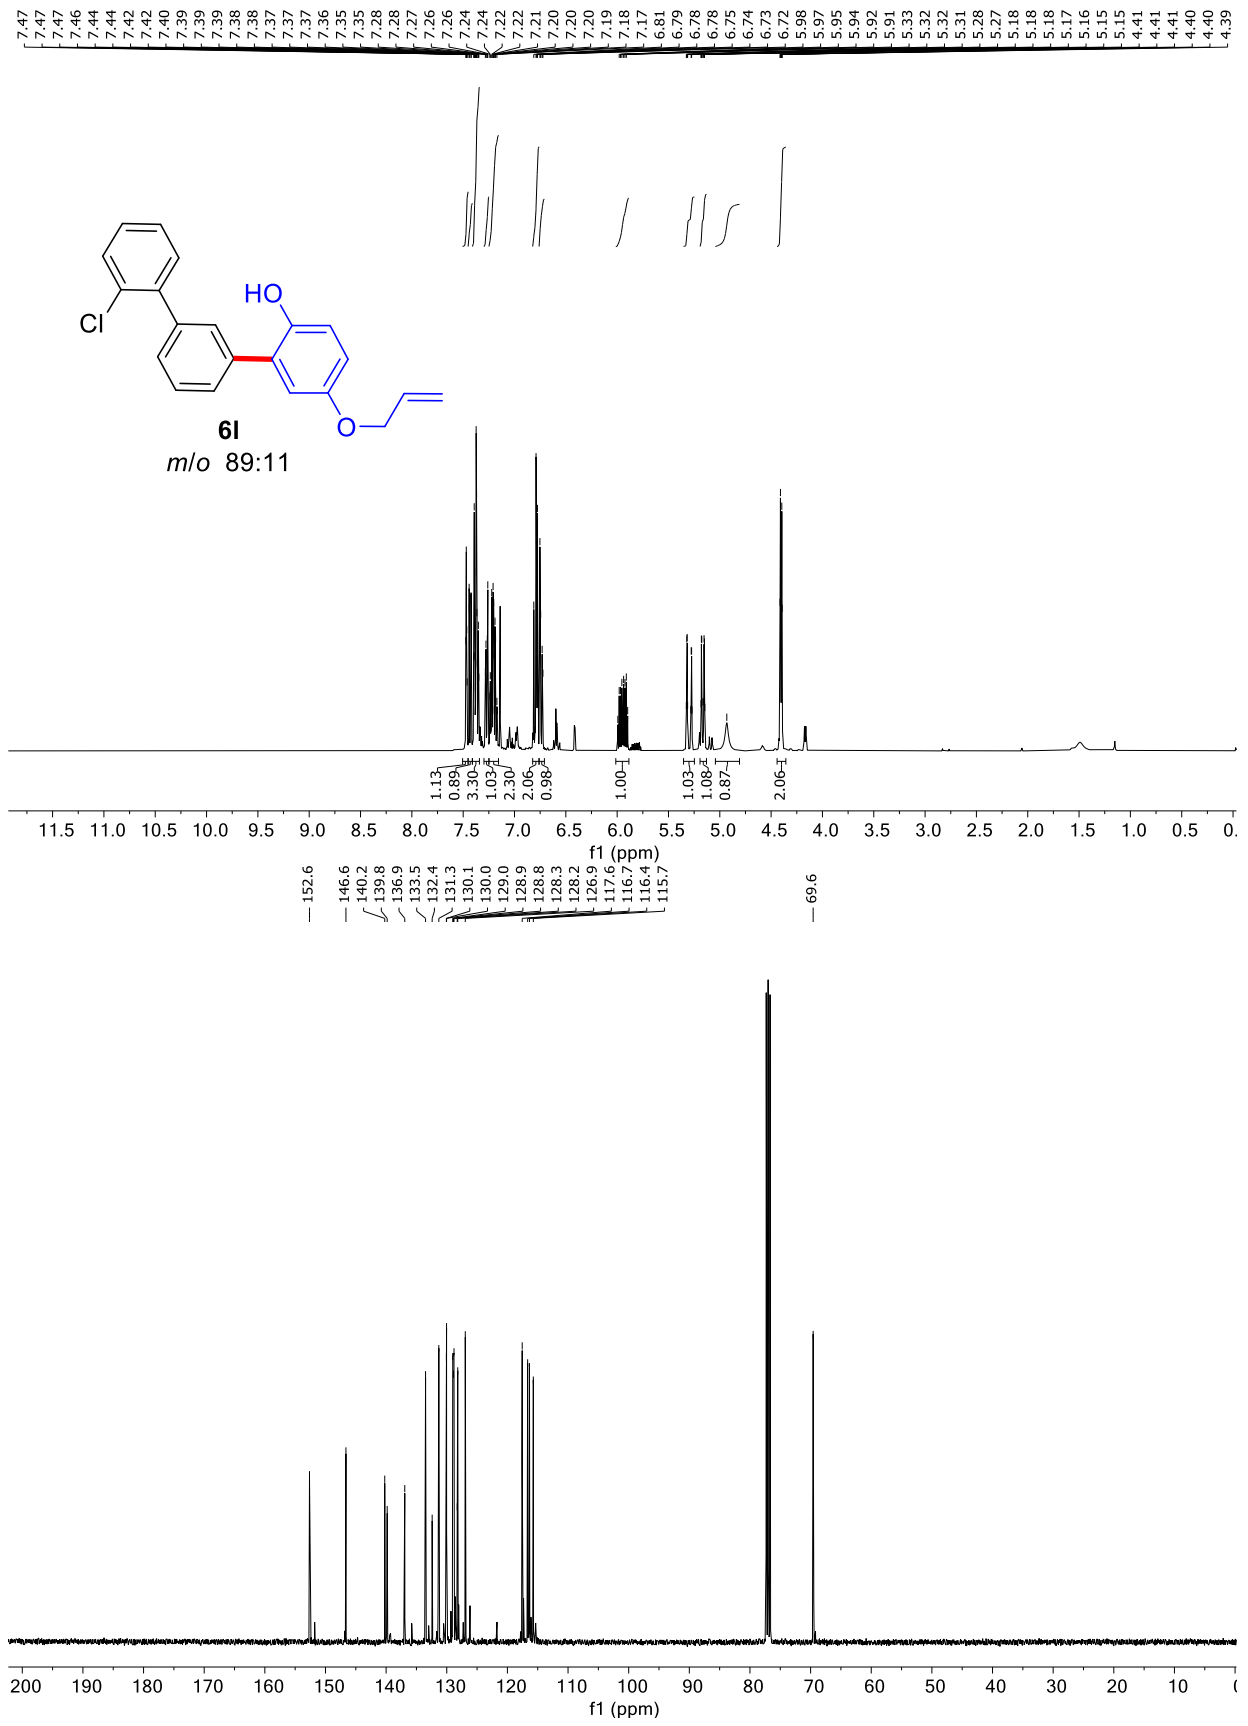

7.51  
7.51  
7.50  
7.48  
7.48  
7.46  
7.44  
7.43  
7.43  
7.42  
7.42  
7.41  
7.41  
7.41  
7.40  
7.39  
7.38  
7.38  
7.32  
7.32  
7.30  
7.30  
7.30  
7.27  
7.26  
7.26  
7.25  
7.24  
7.24  
7.24  
7.23  
7.22  
6.85  
6.85  
6.83  
6.82  
6.81  
6.80  
6.78  
6.77  
6.76  
6.75  
3.72  
3.70  
1.19  
0.58  
0.57  
0.57  
0.57  
0.56  
0.56  
0.55  
0.55  
0.55  
0.54  
0.53  
0.28  
0.27  
0.27  
0.26  
0.26  
0.25

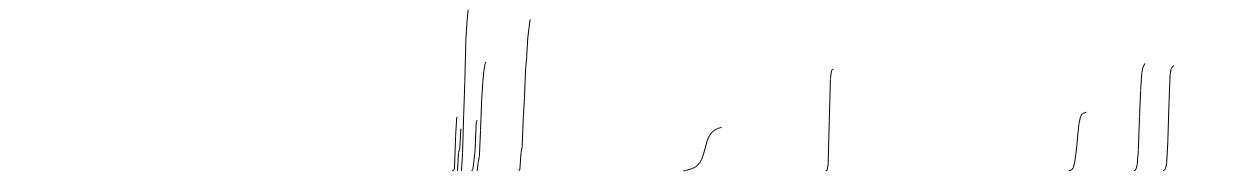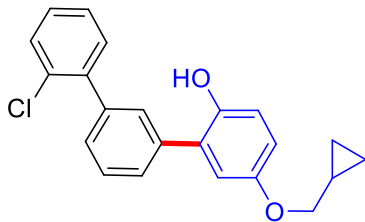

**6m**  
m/o 89:11

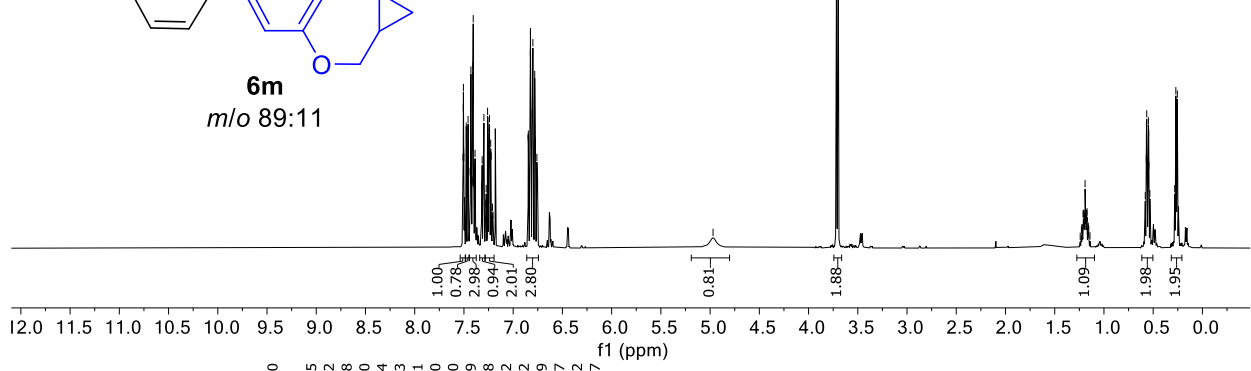

153.0  
146.5  
140.2  
139.8  
137.0  
132.4  
131.3  
130.1  
130.0  
129.0  
128.9  
128.8  
128.2  
128.2  
126.9  
116.7  
116.2  
115.7  
73.6  
10.4  
3.1

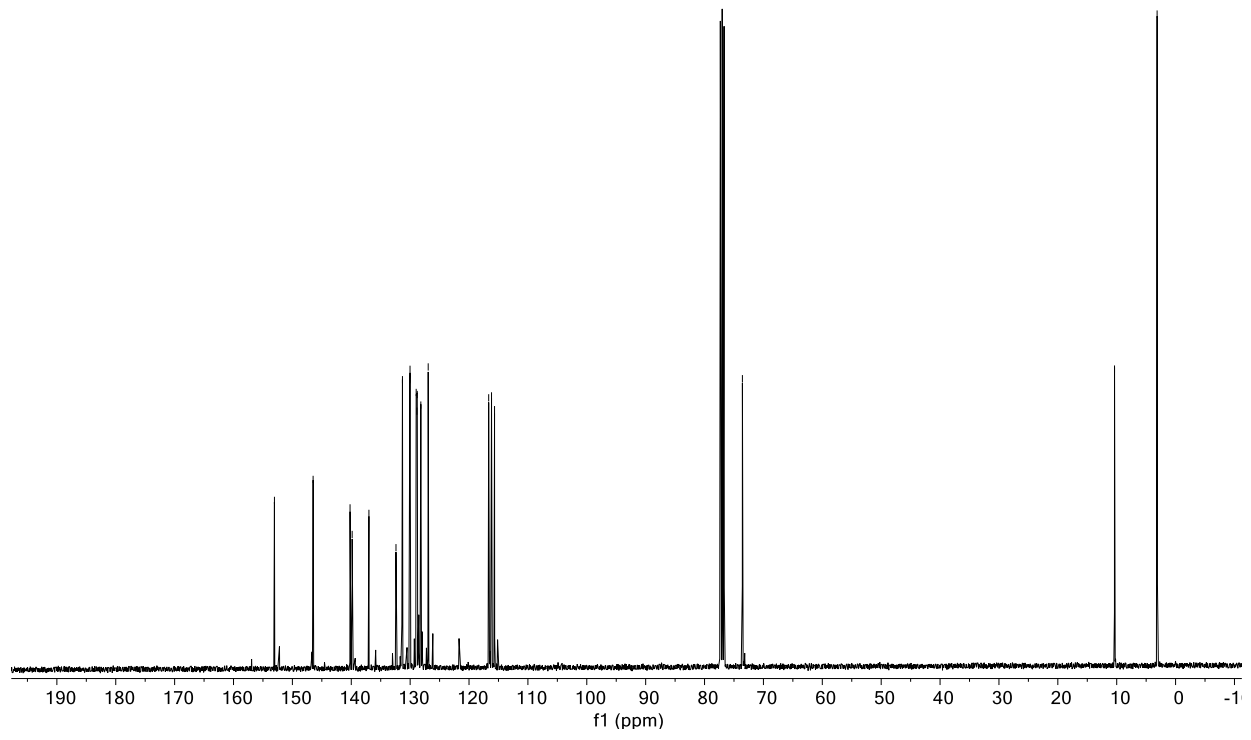



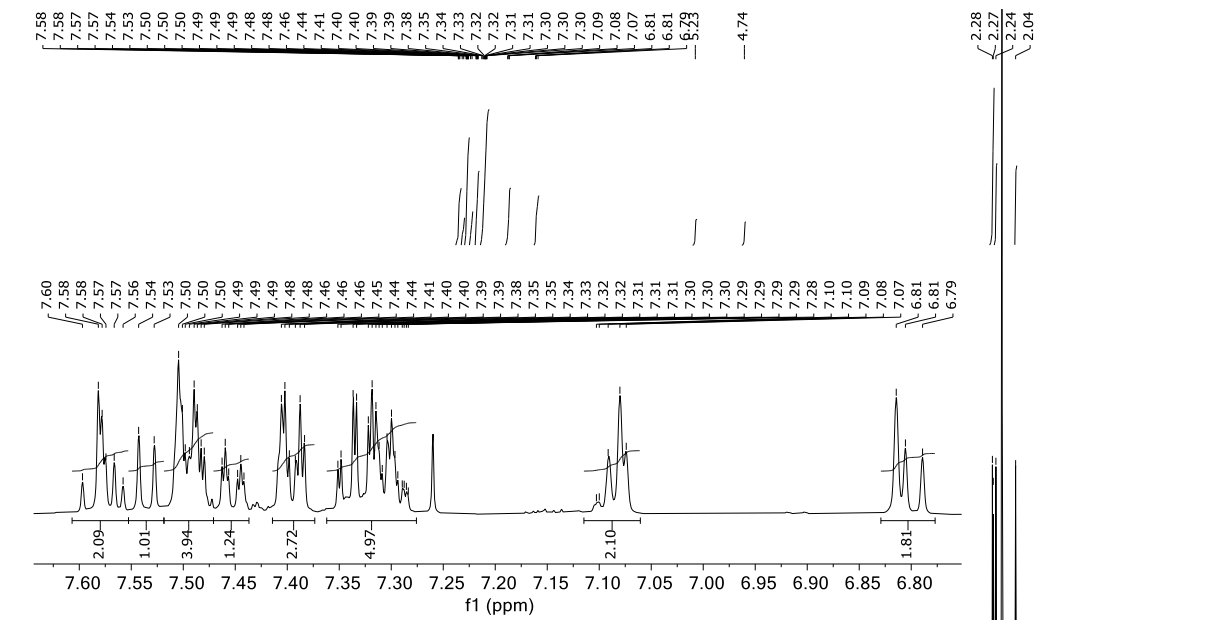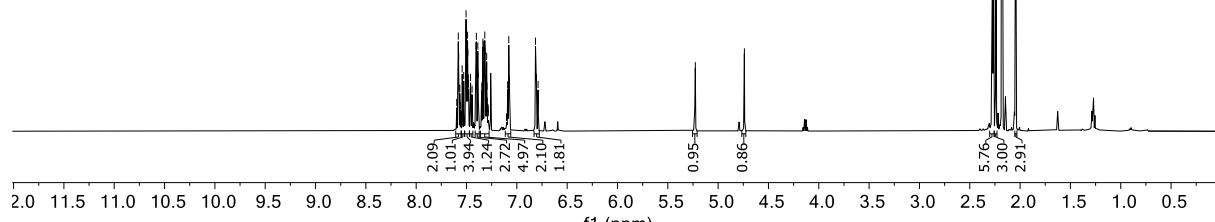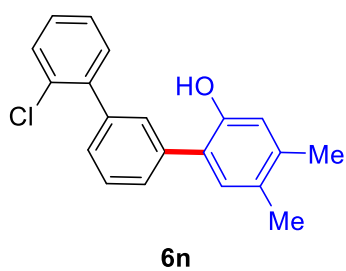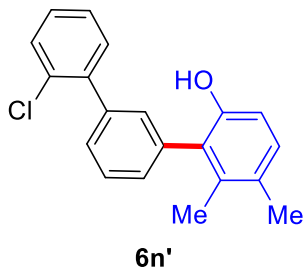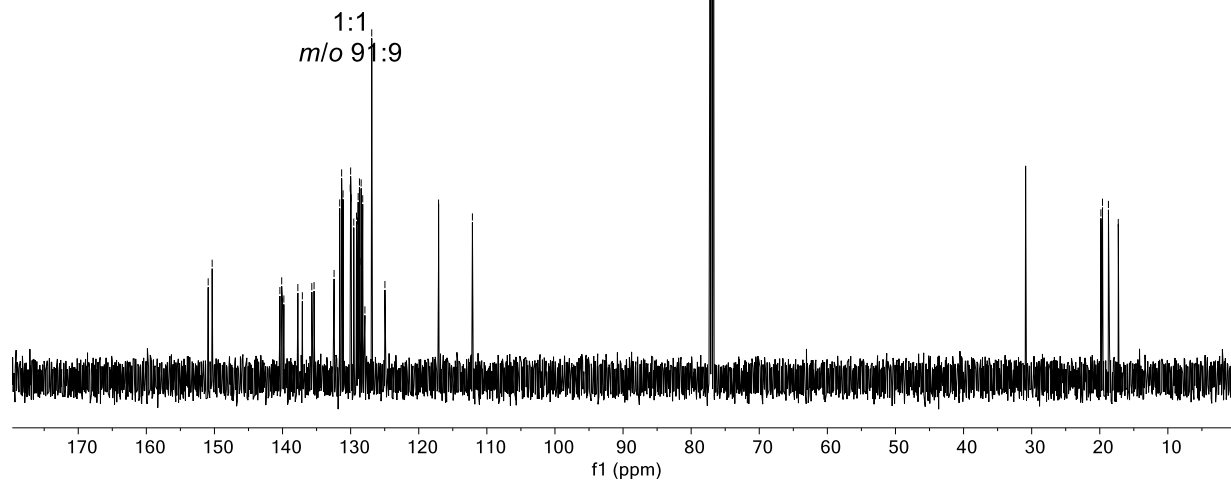

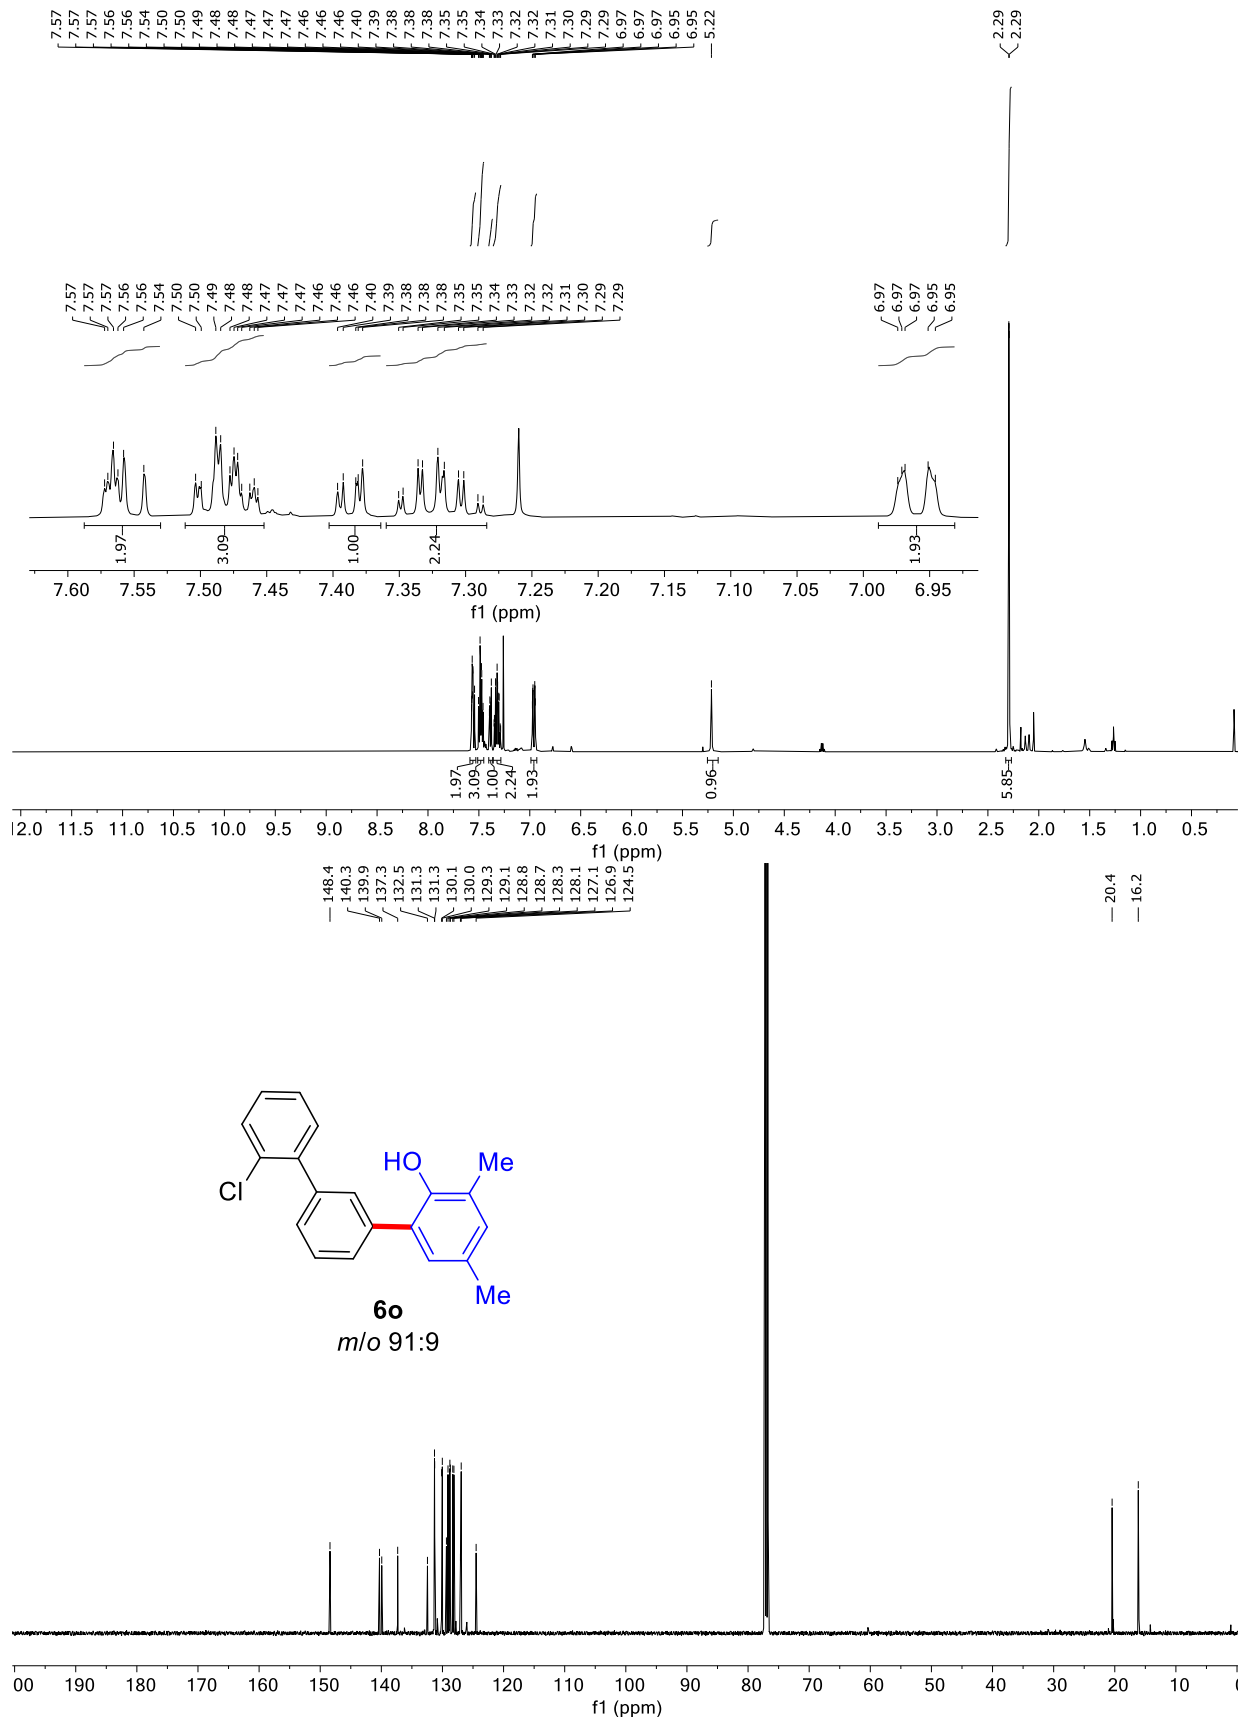

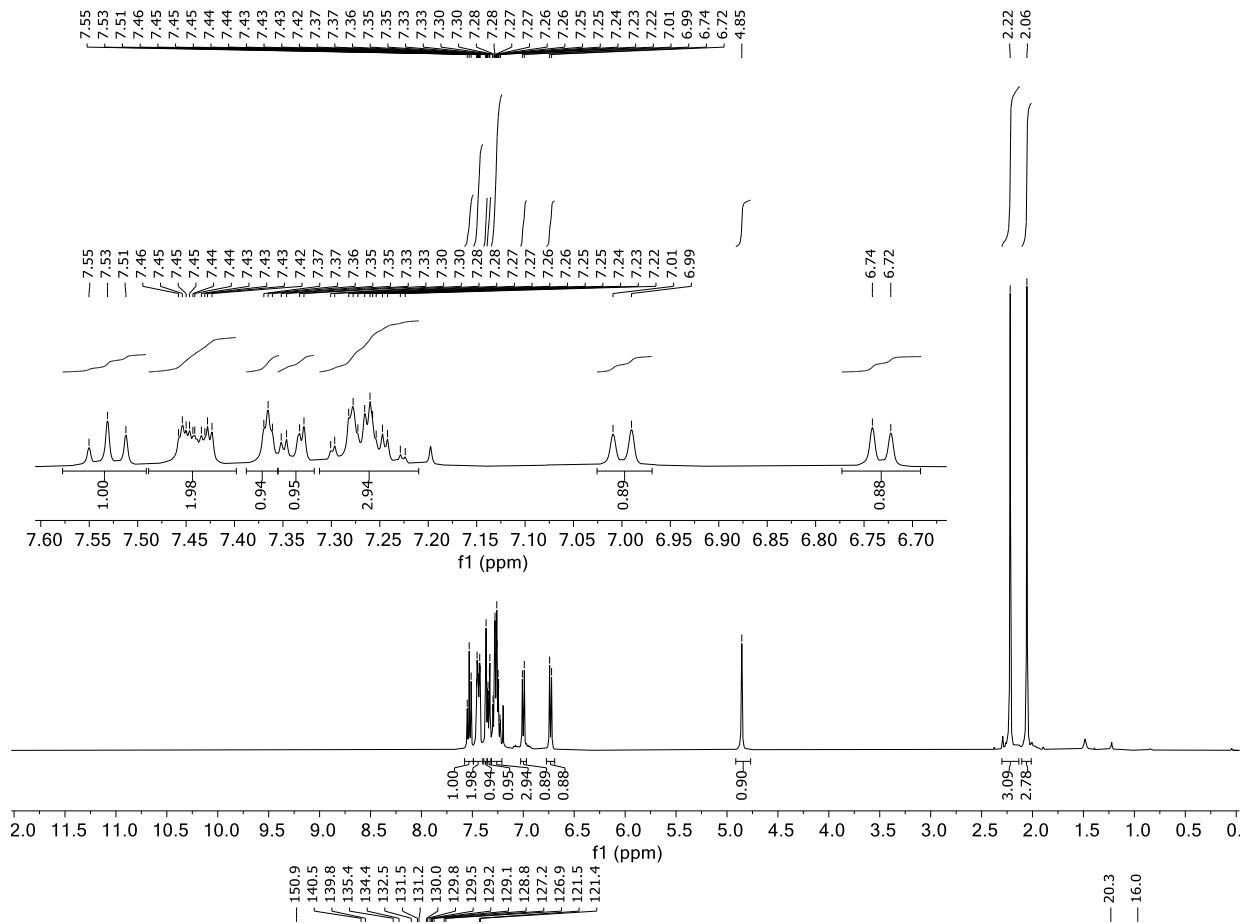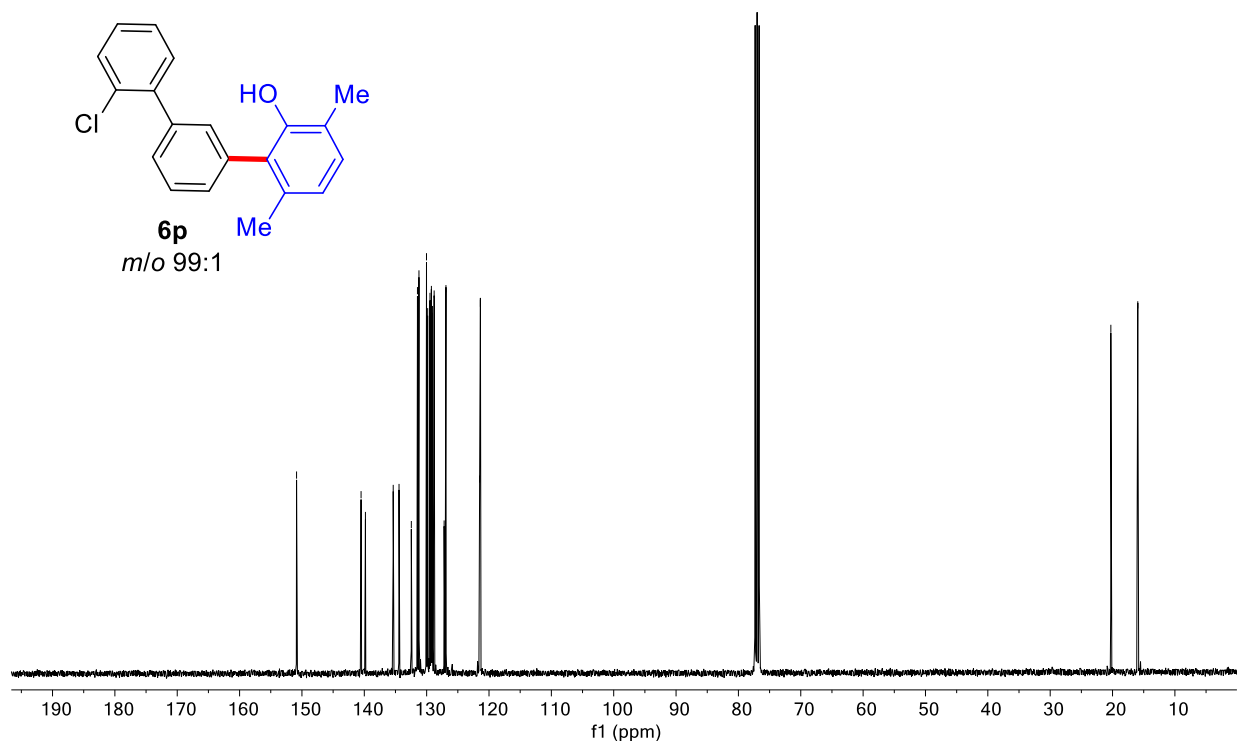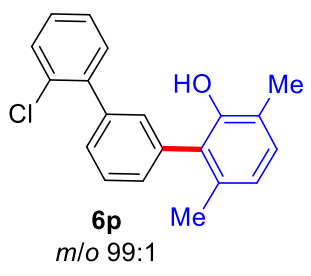

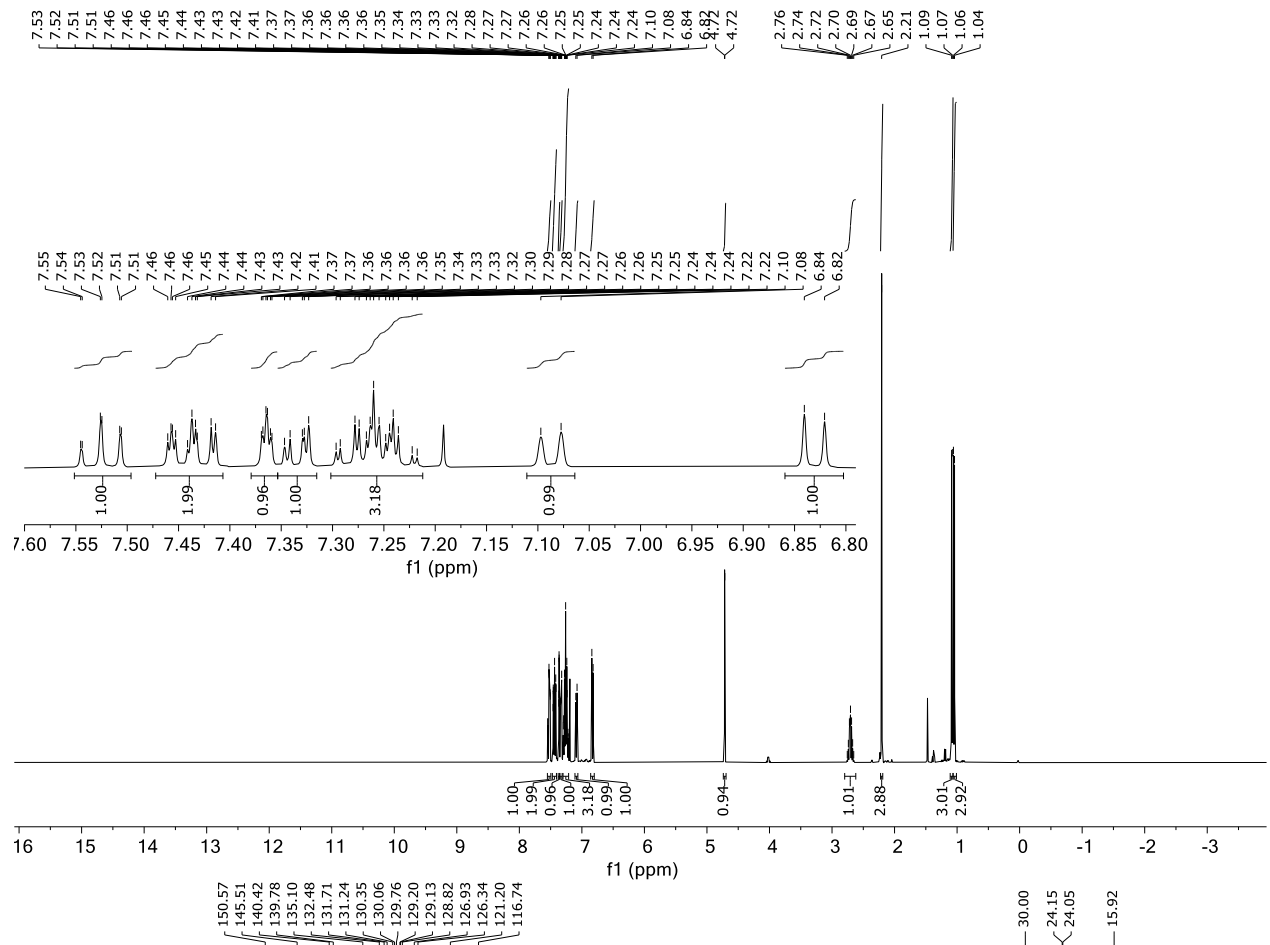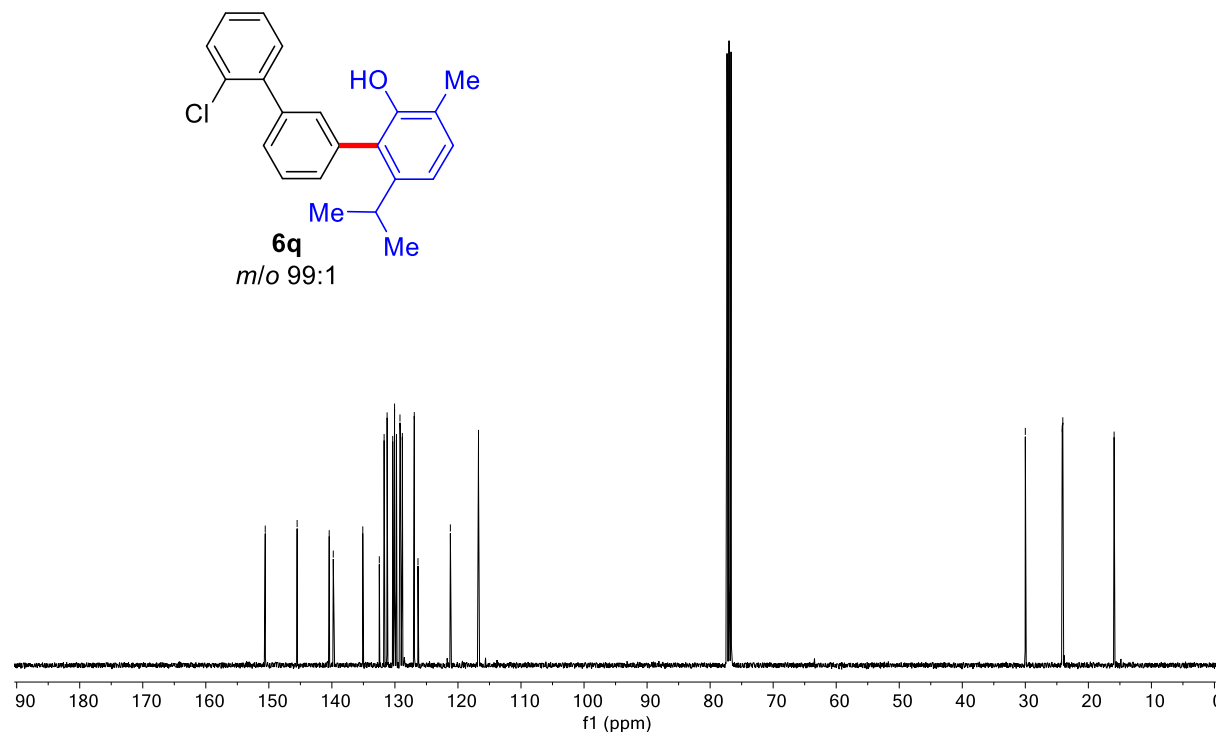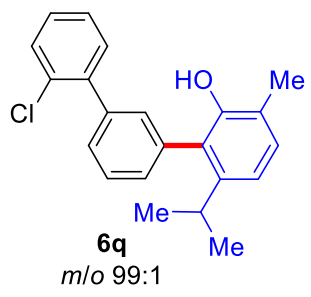

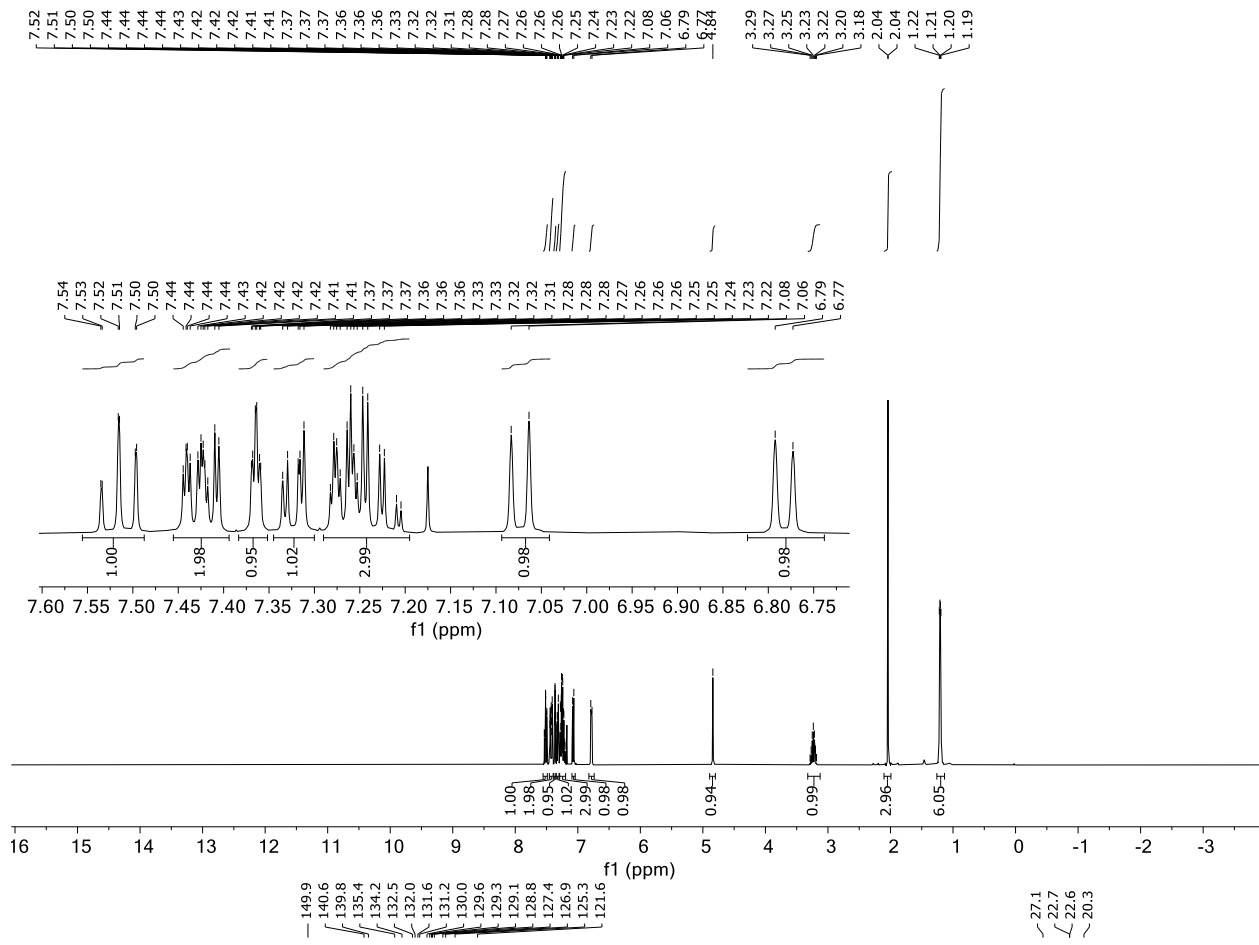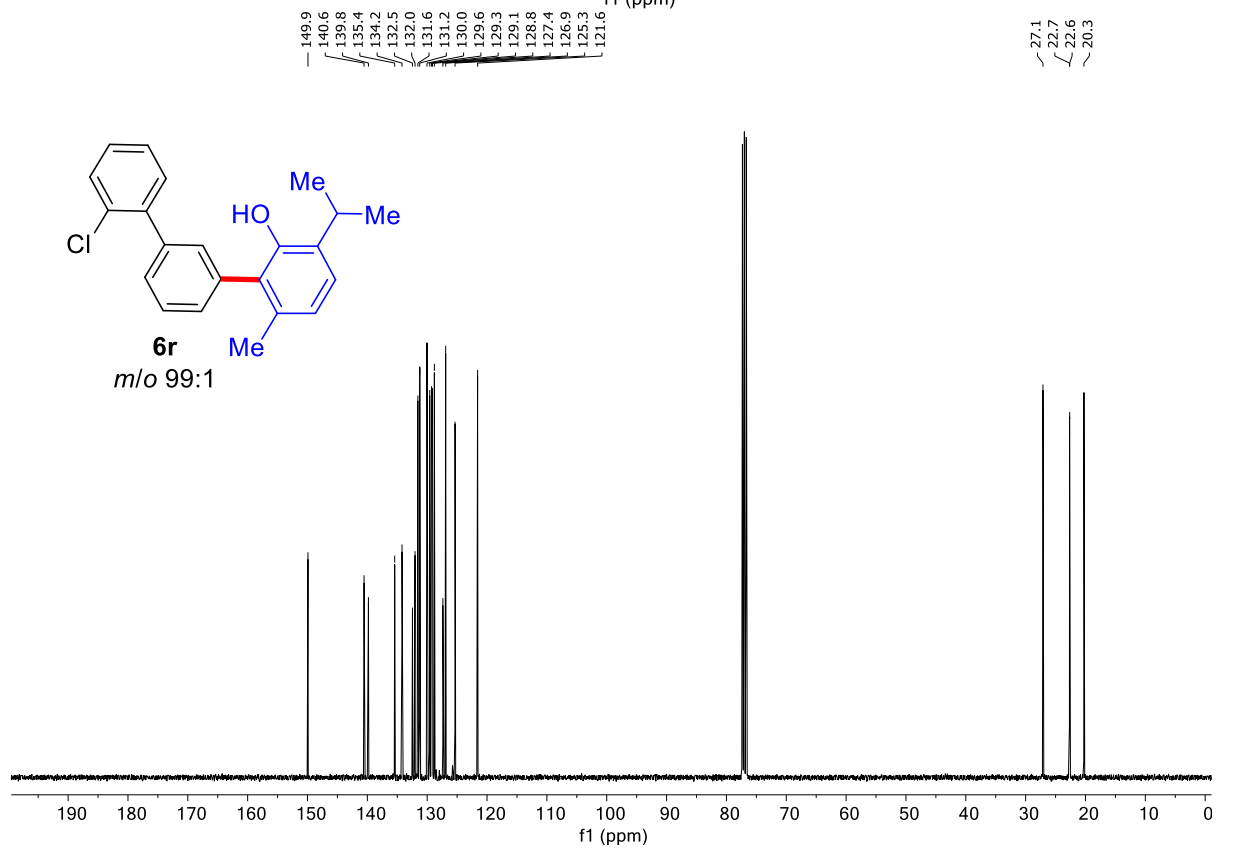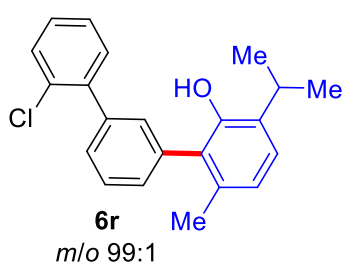

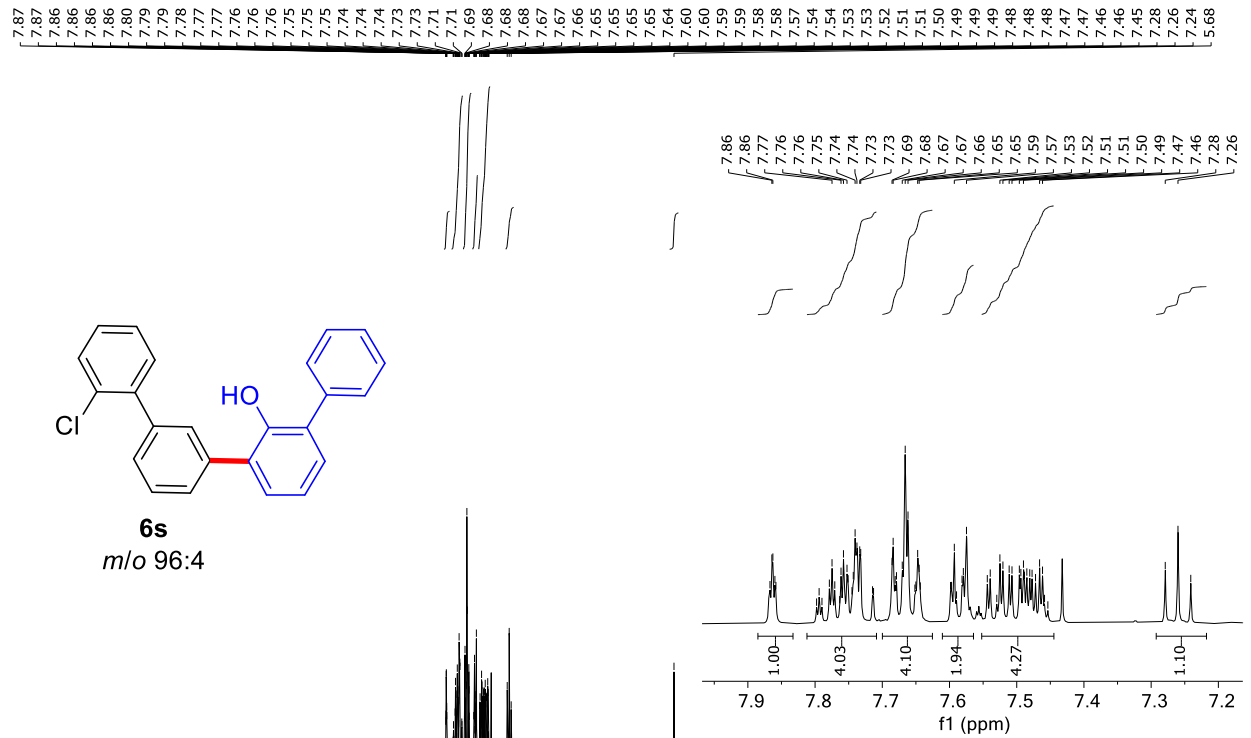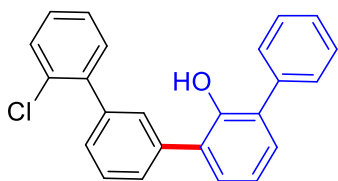

**6s**  
*m/o* 96:4

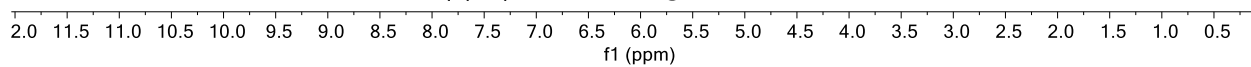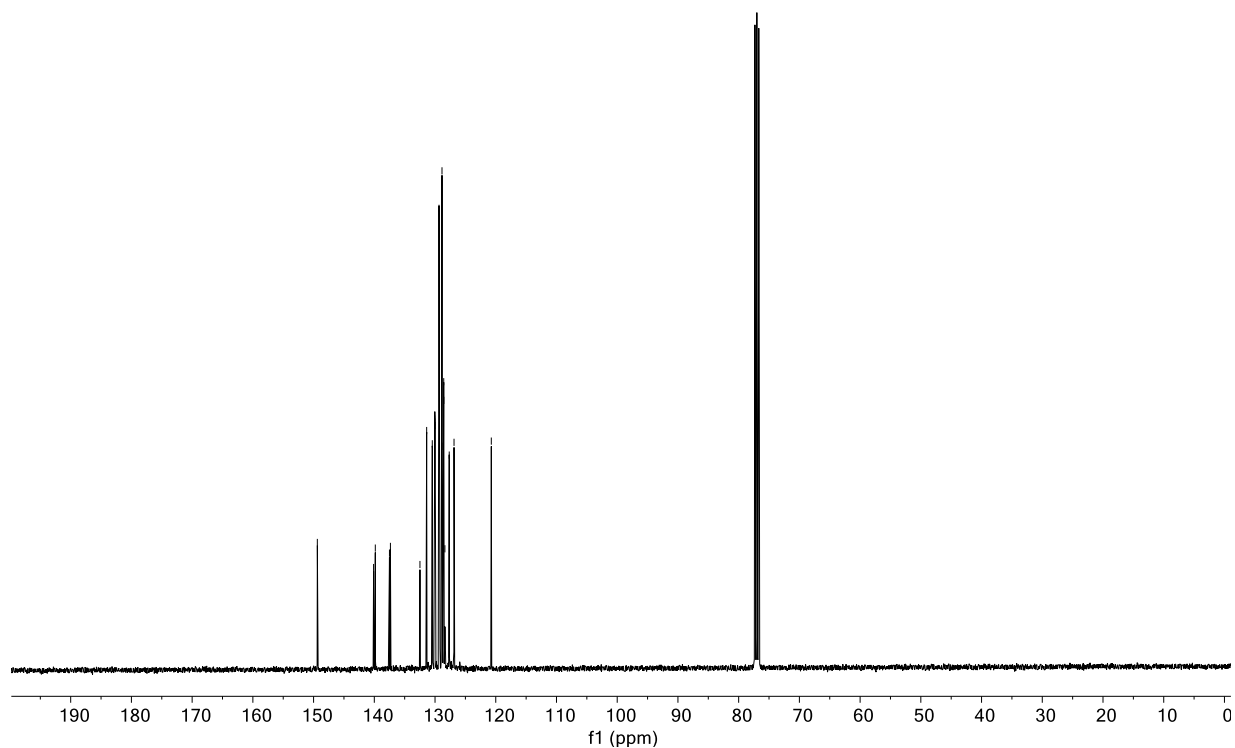



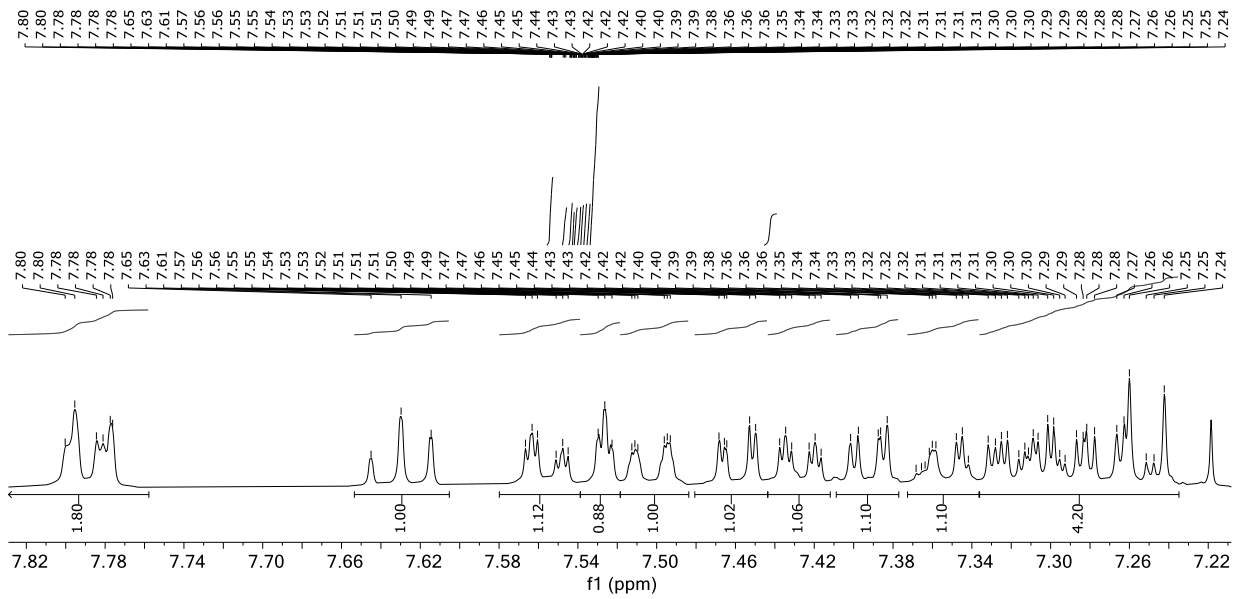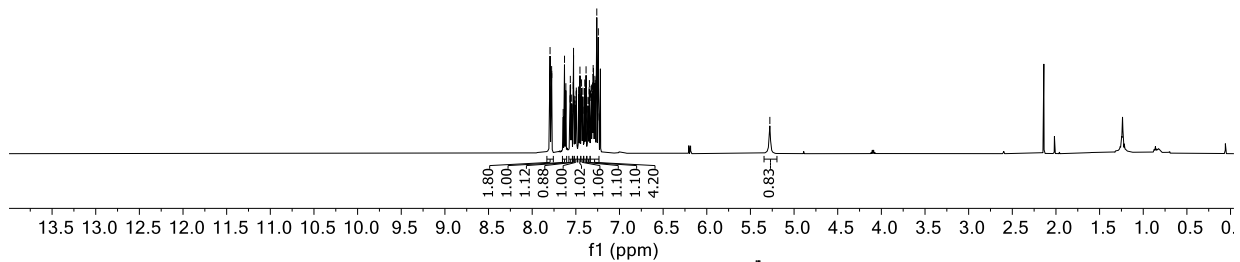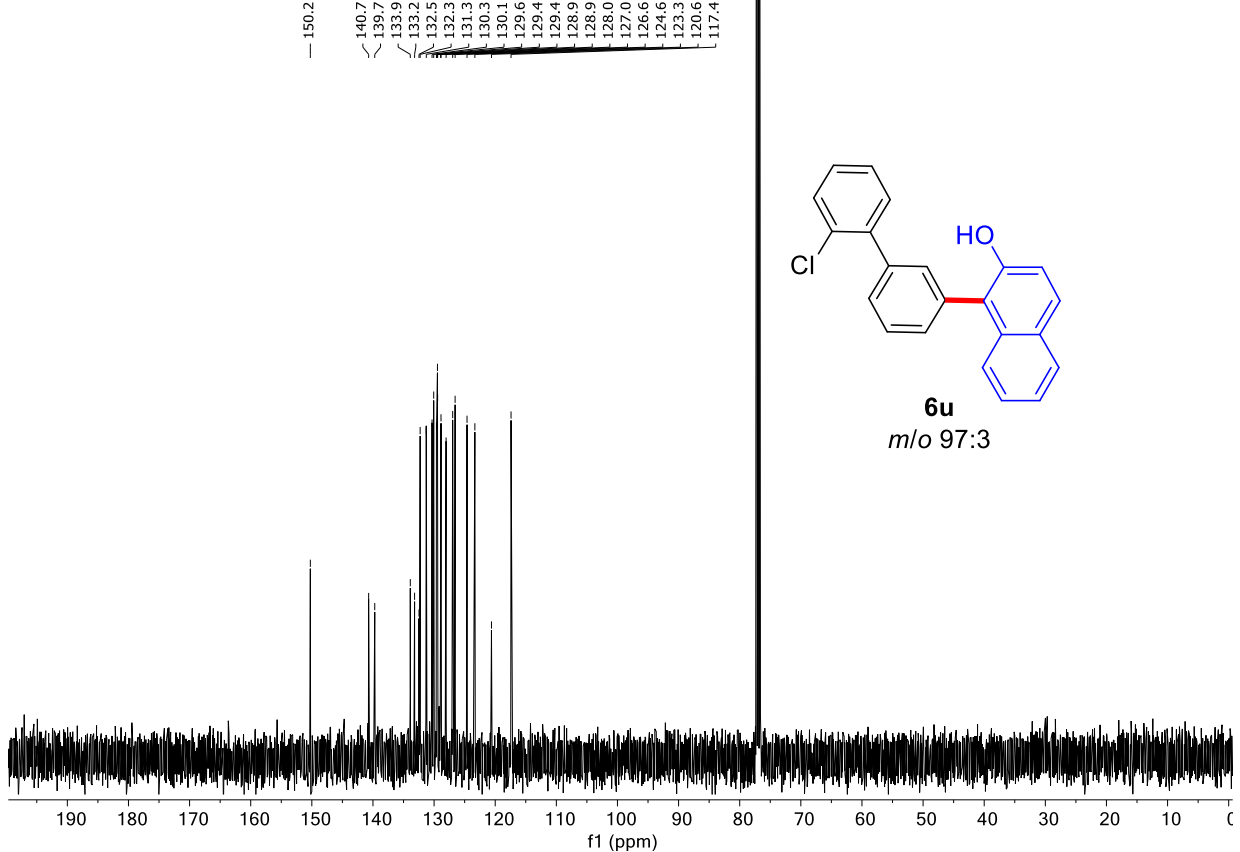



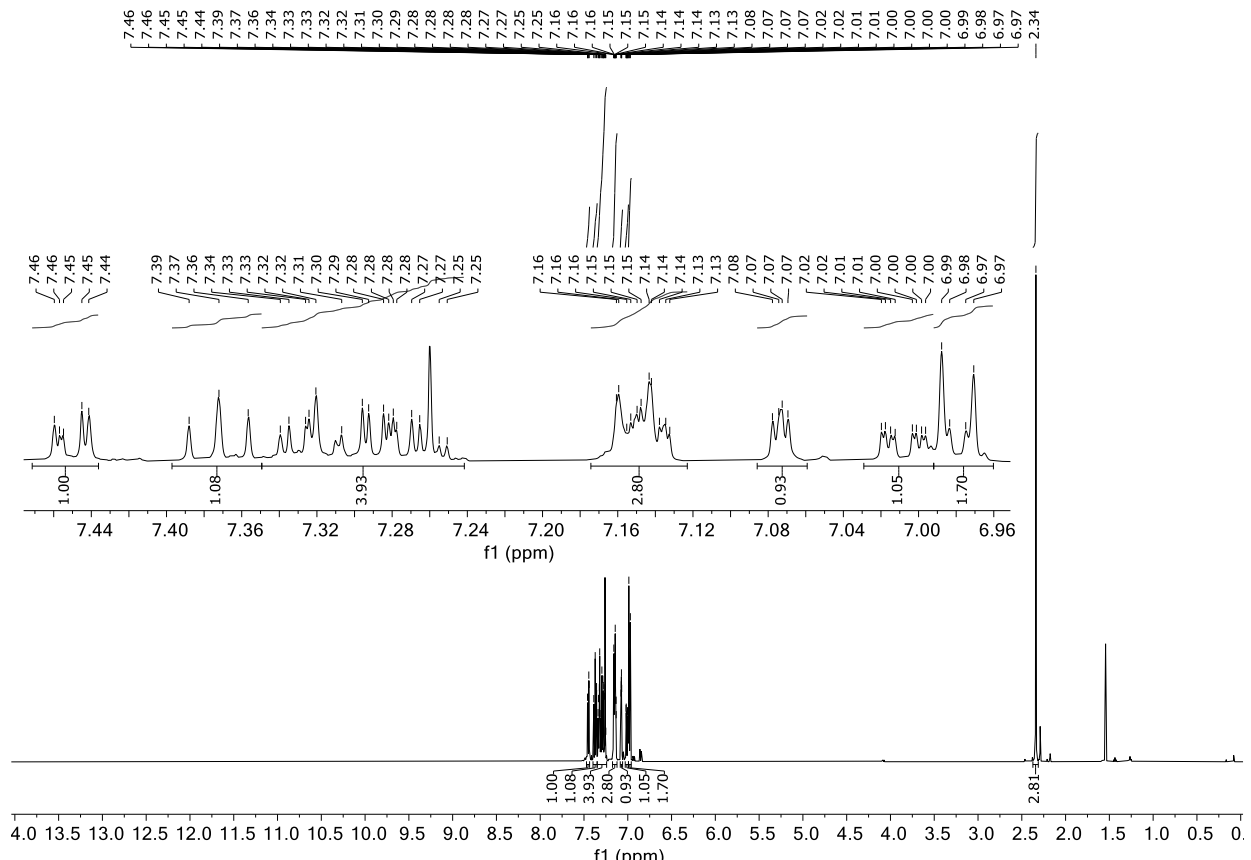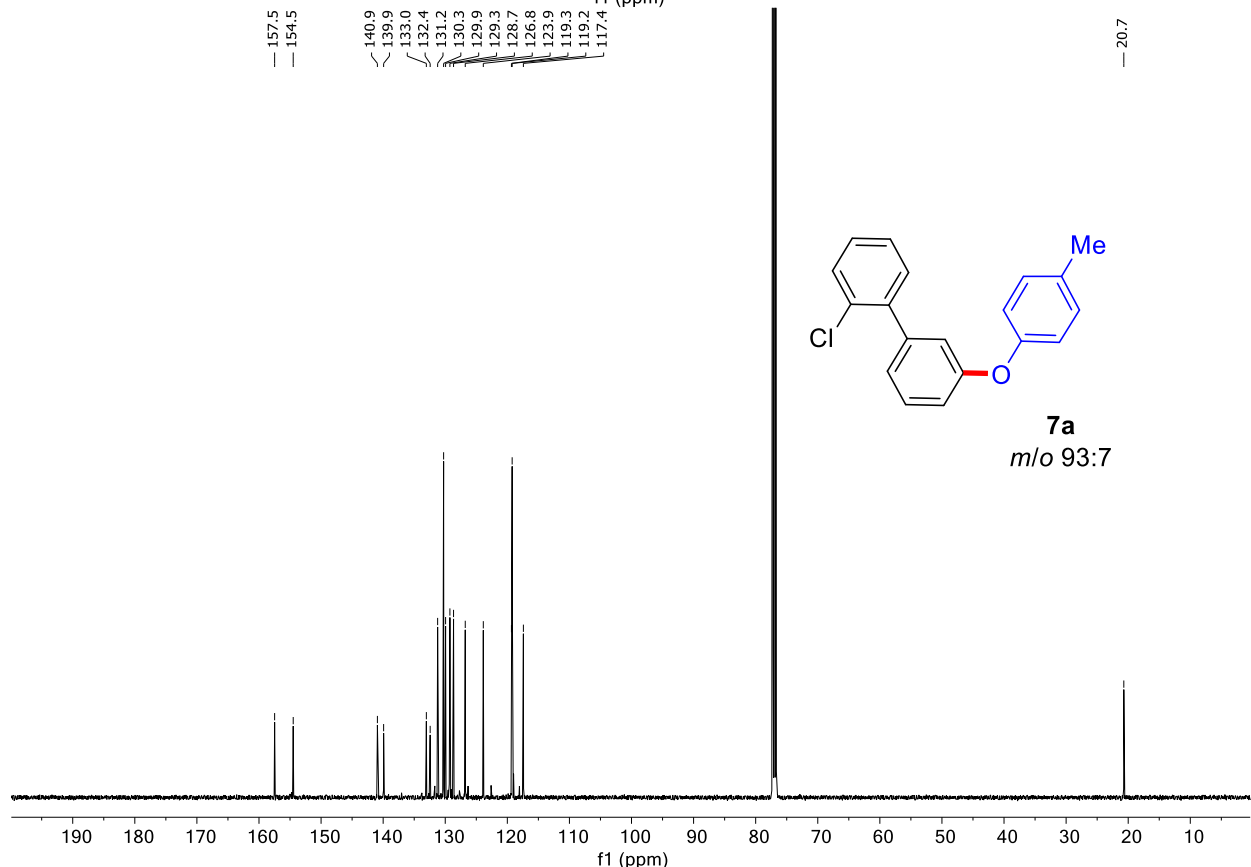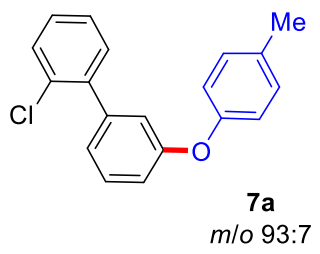

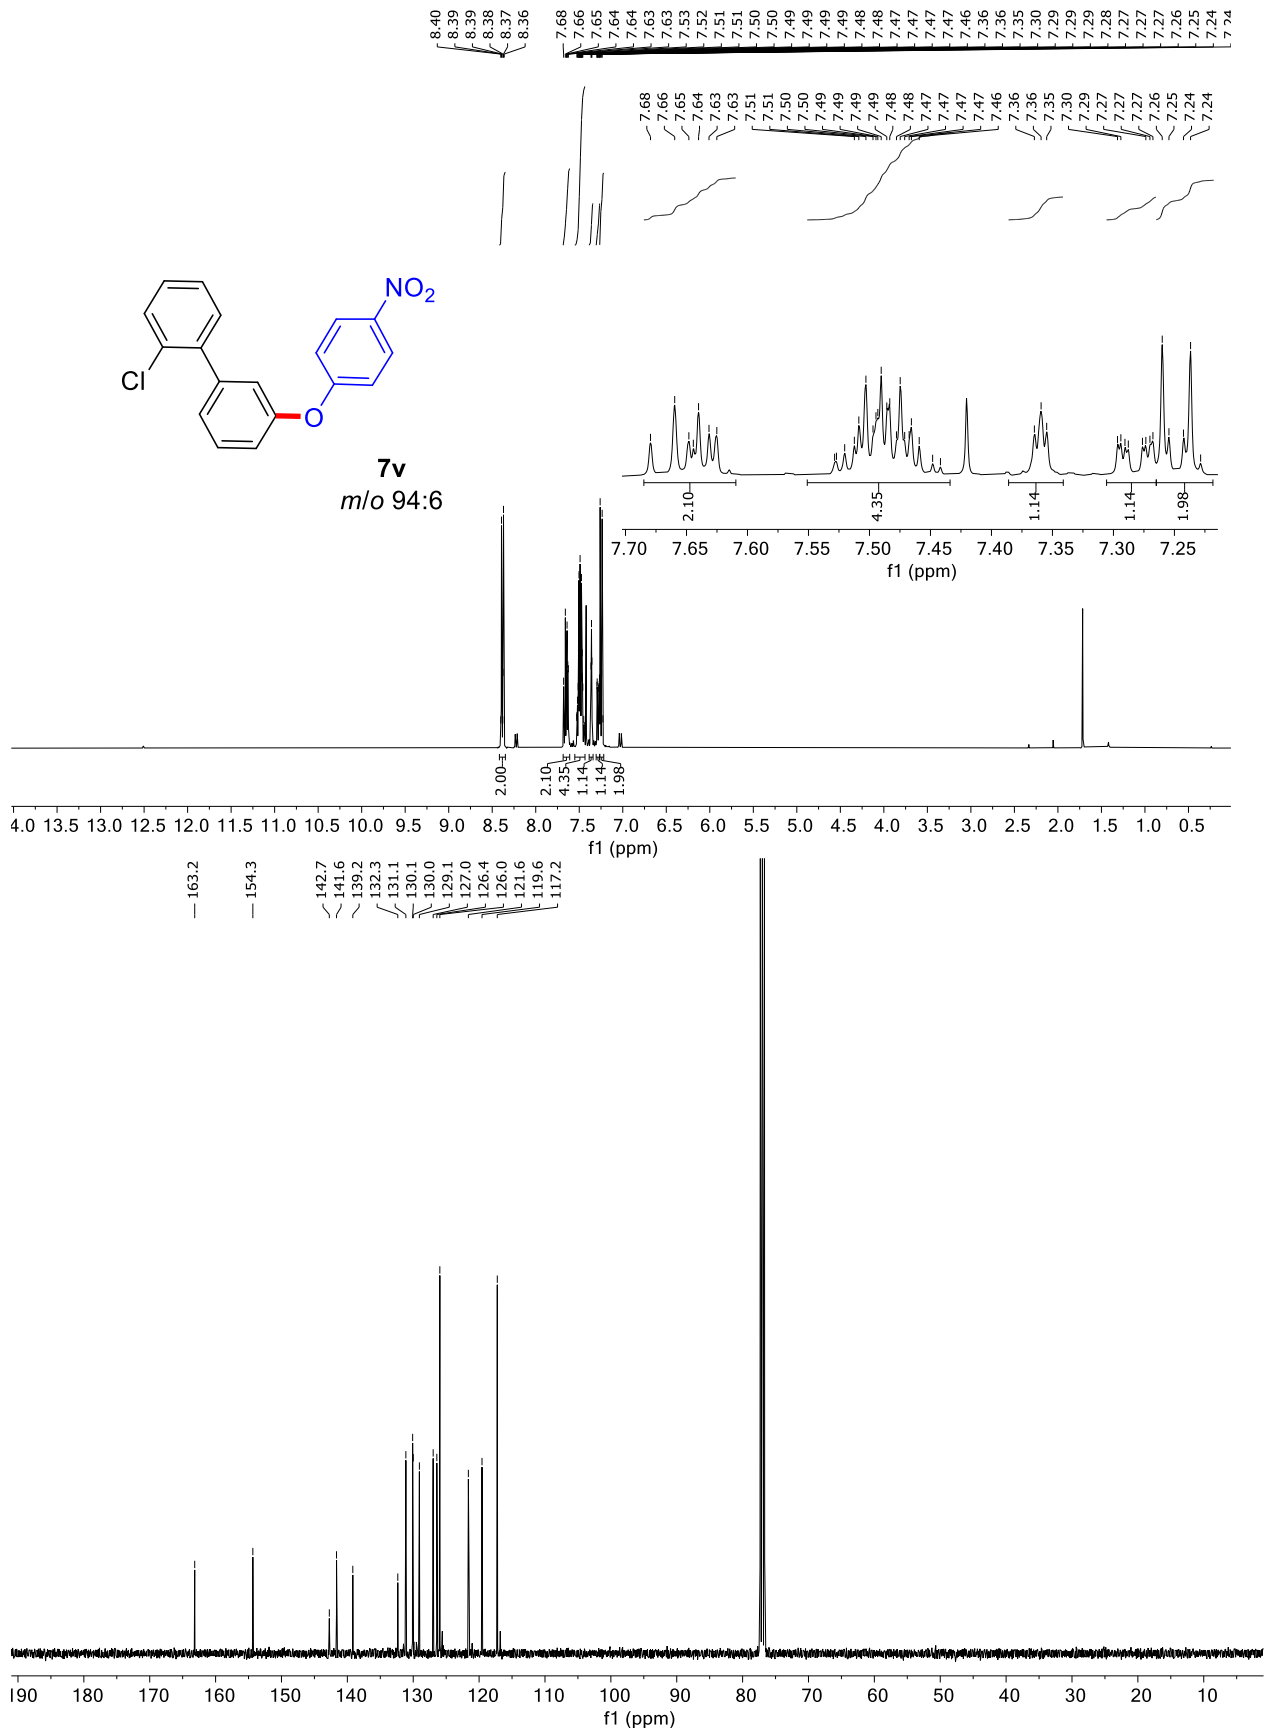

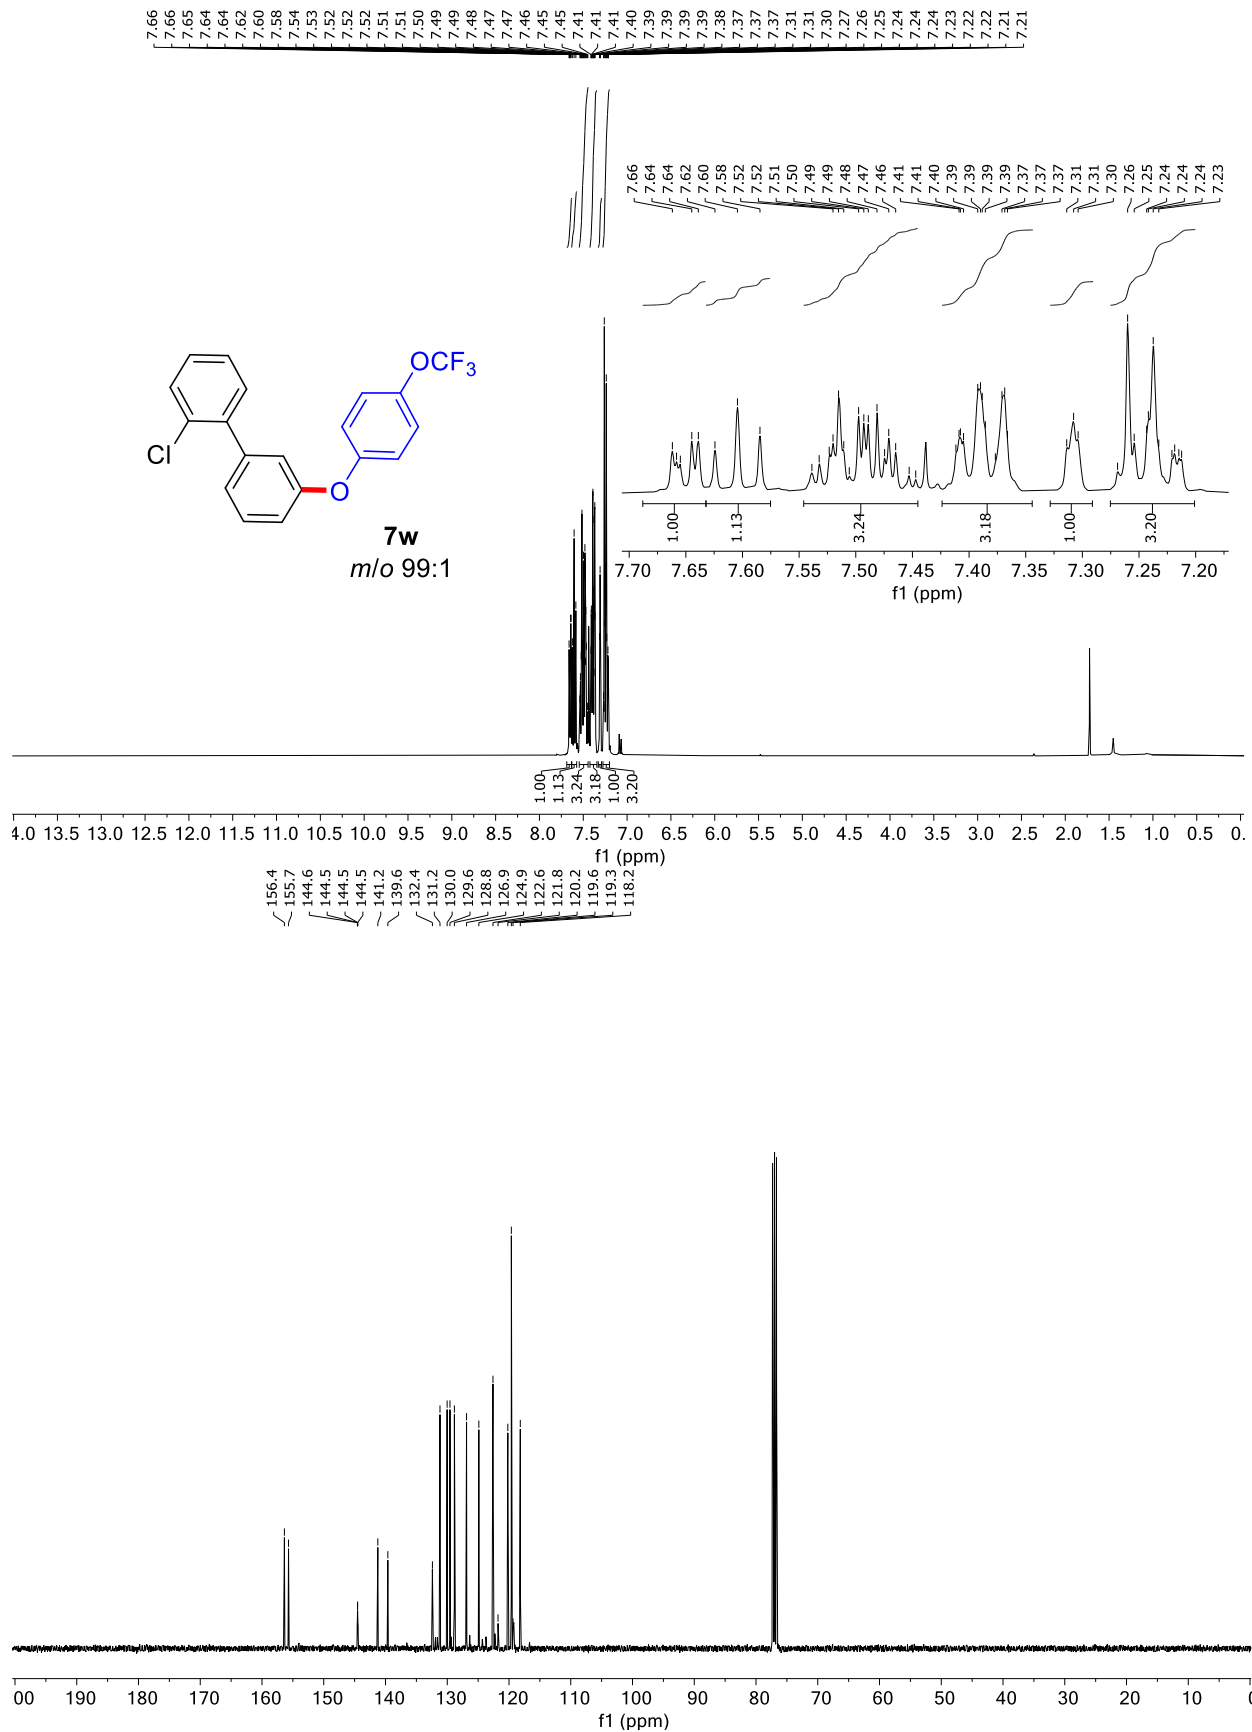

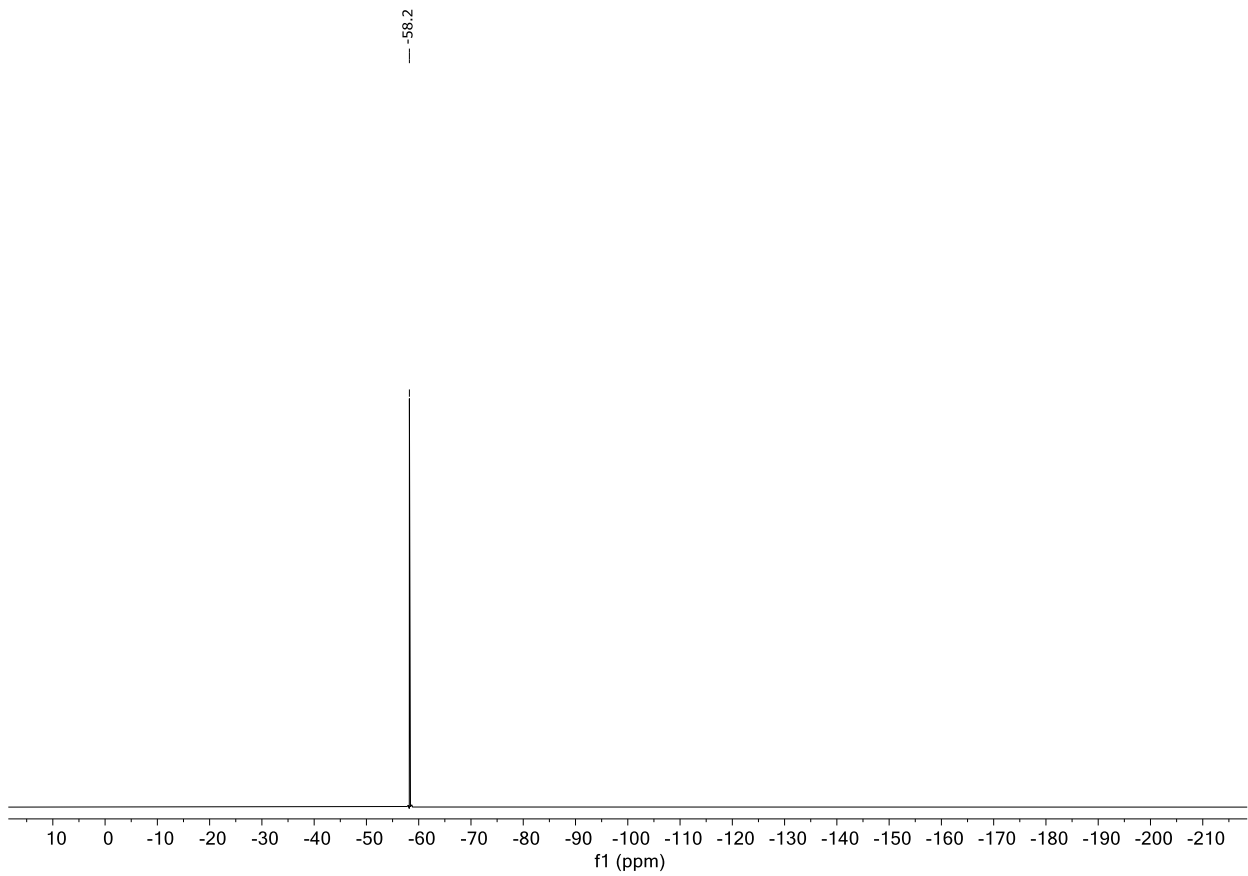



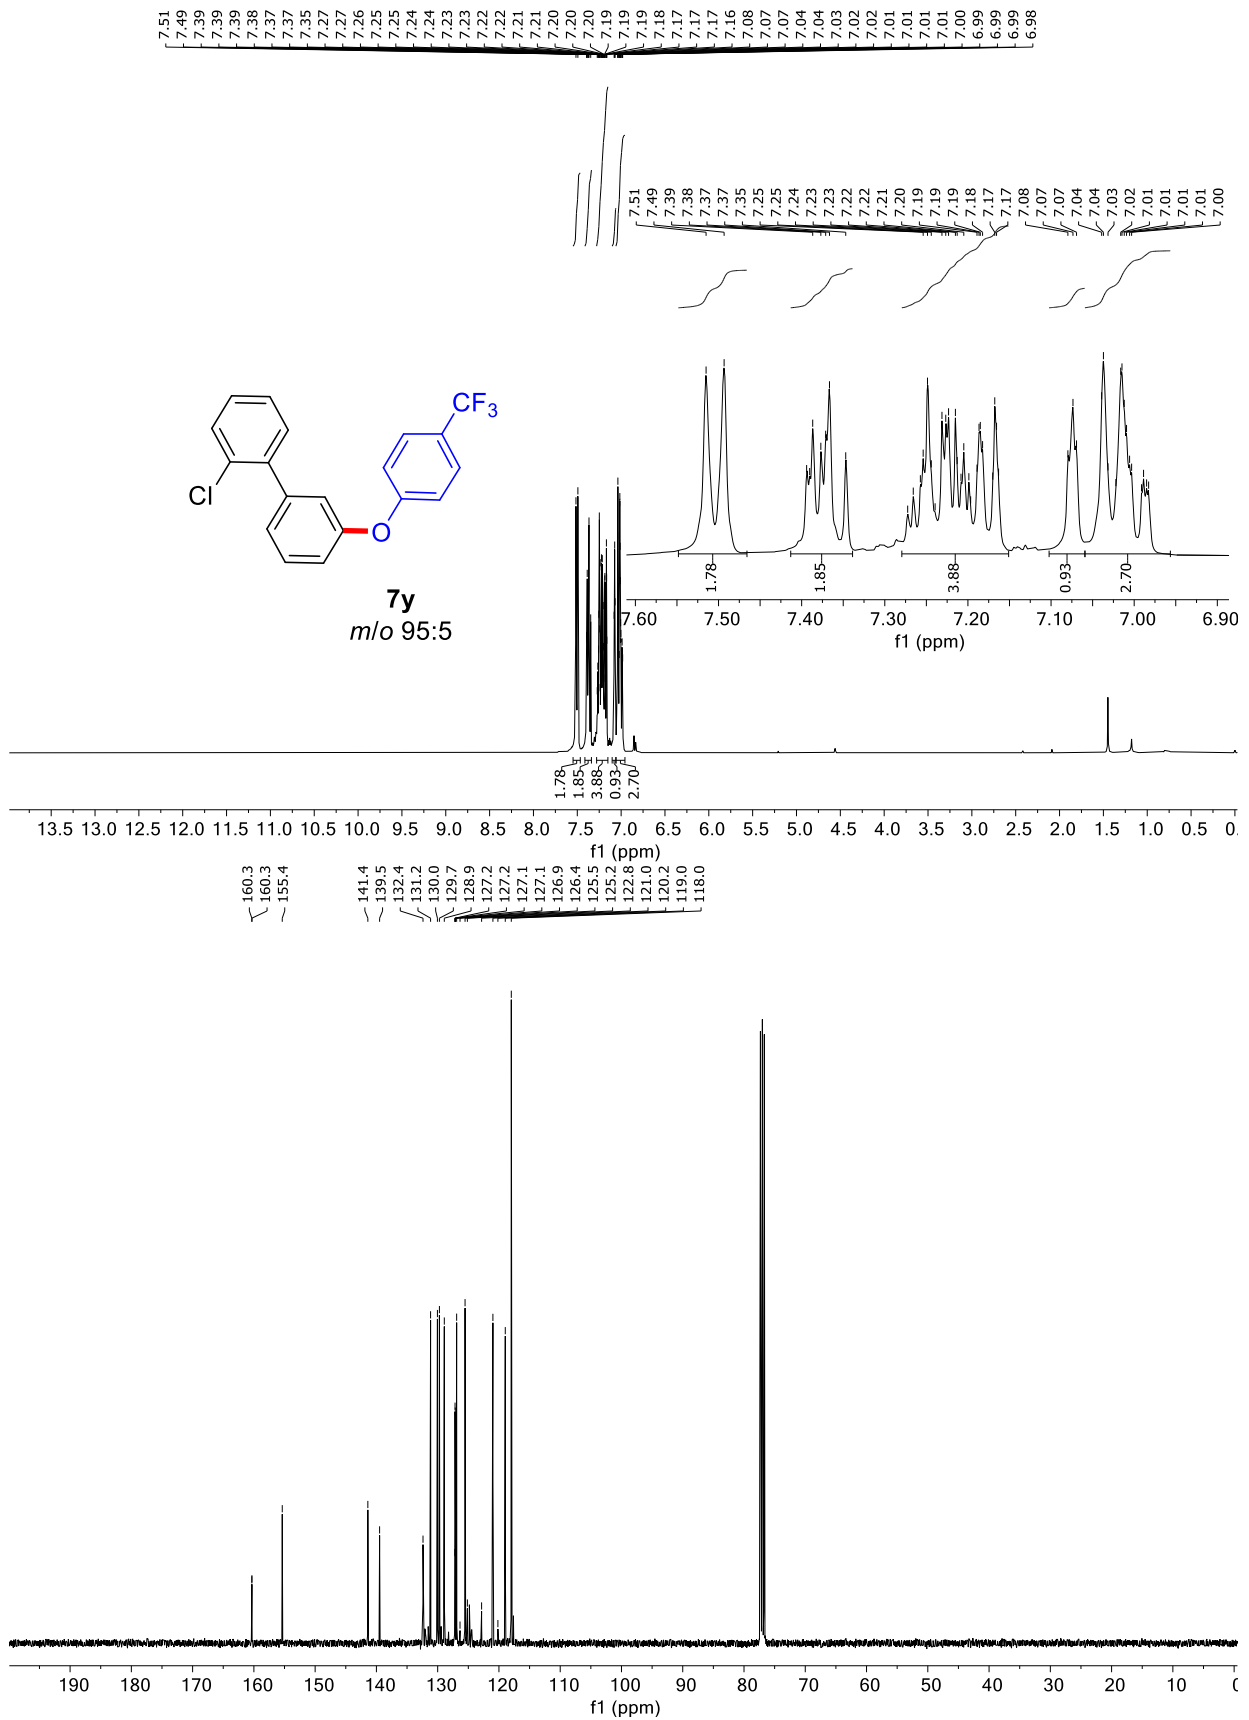

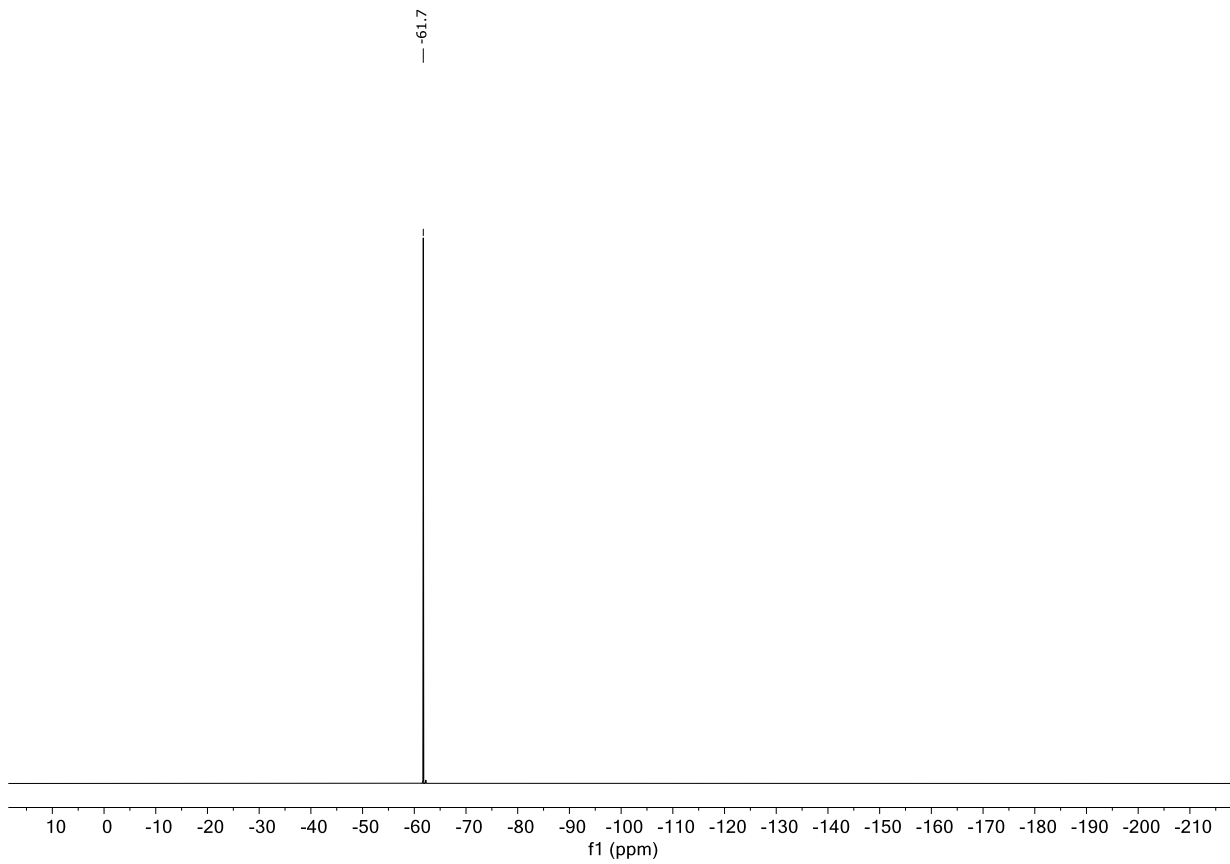

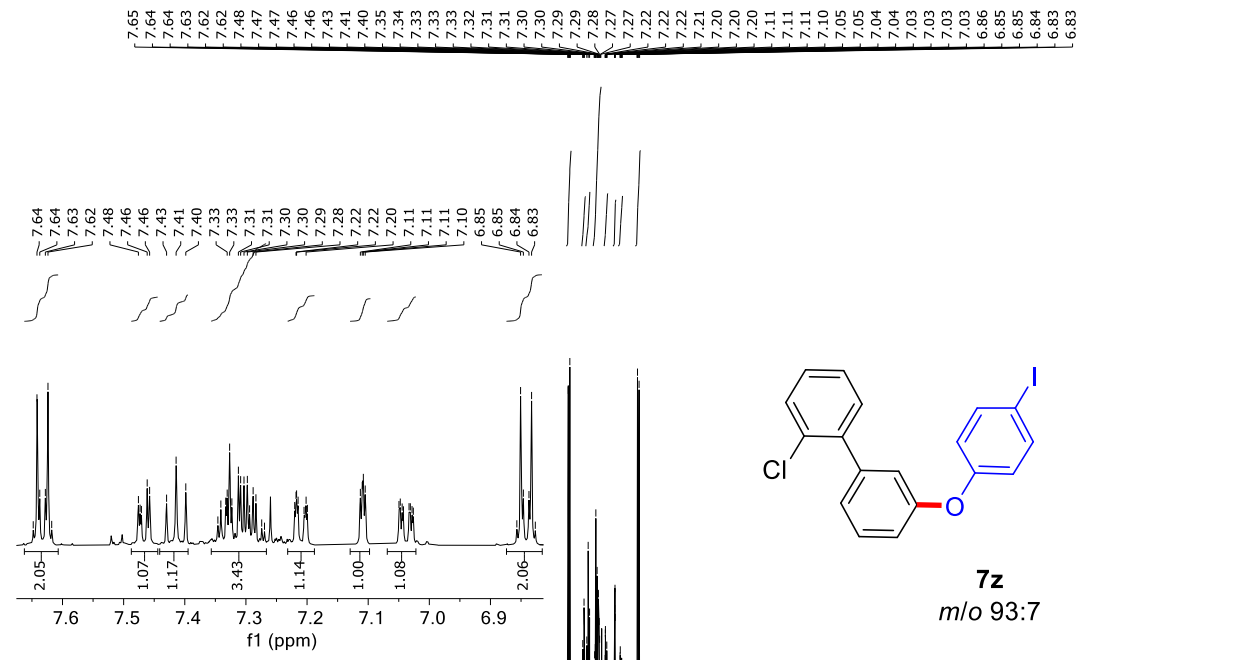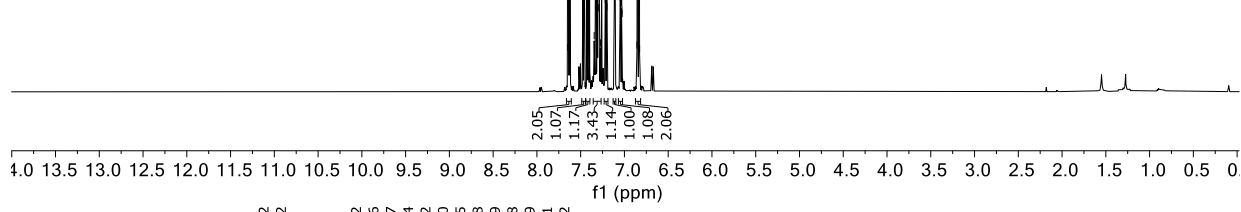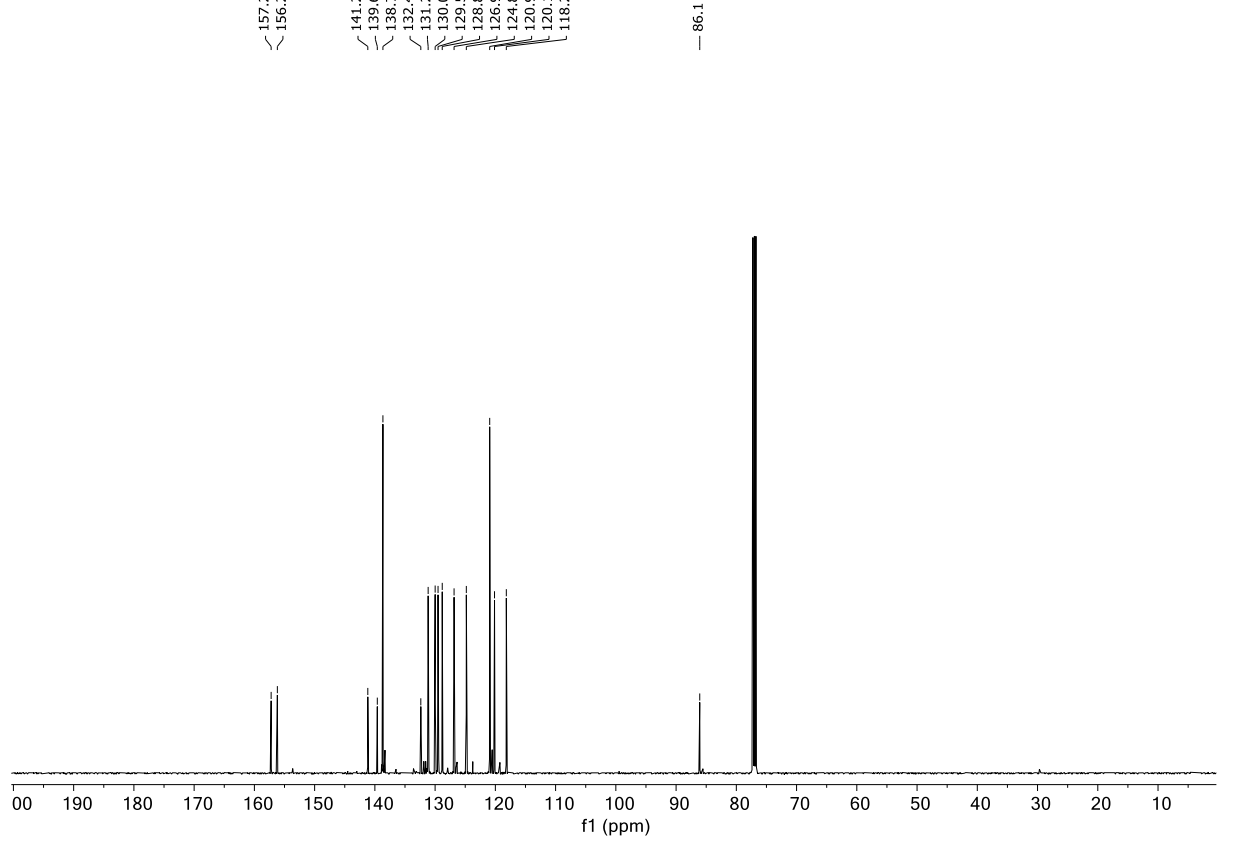



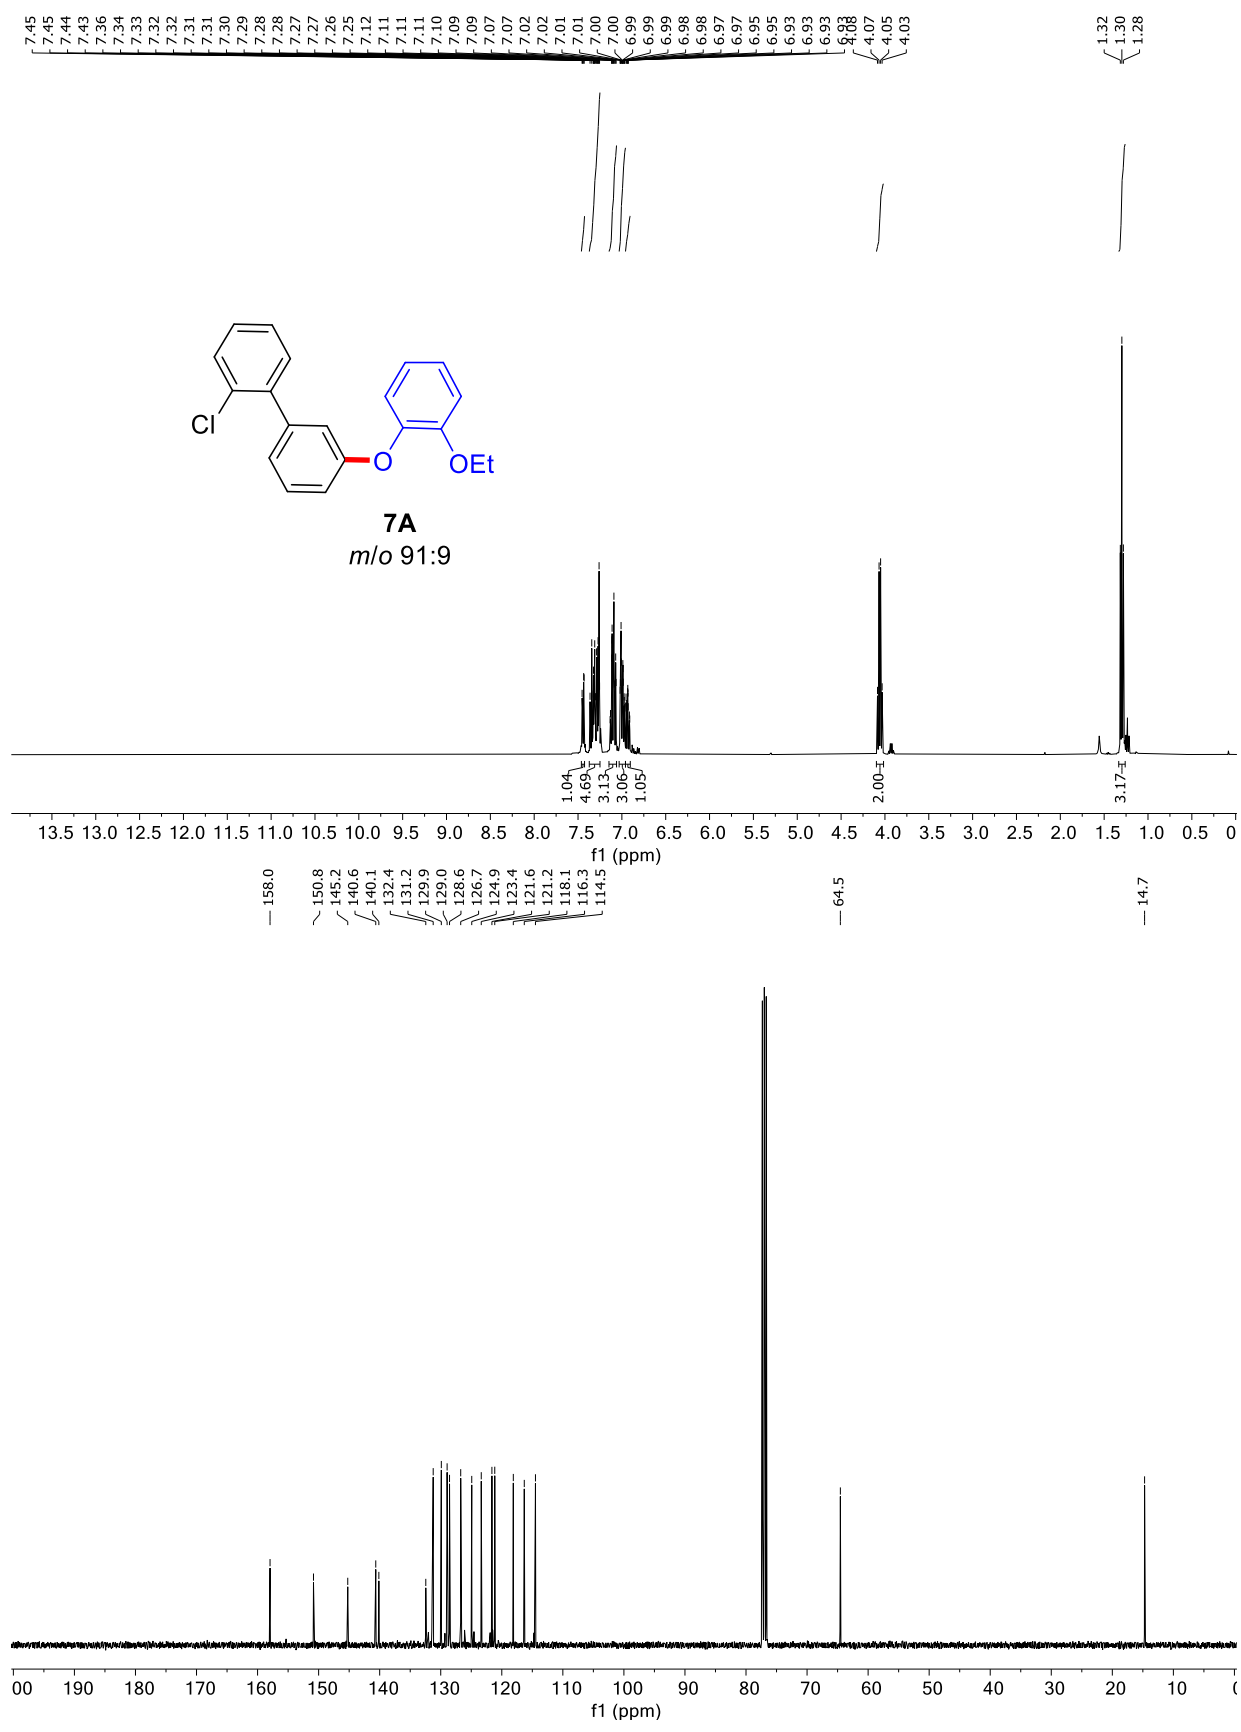

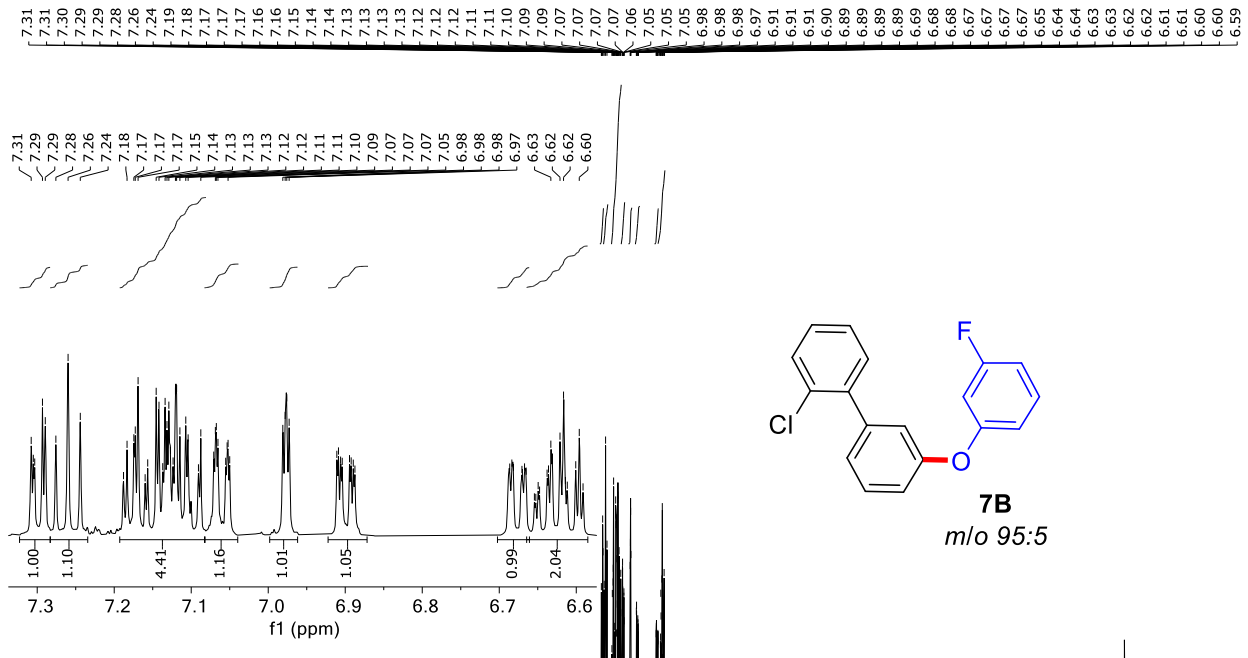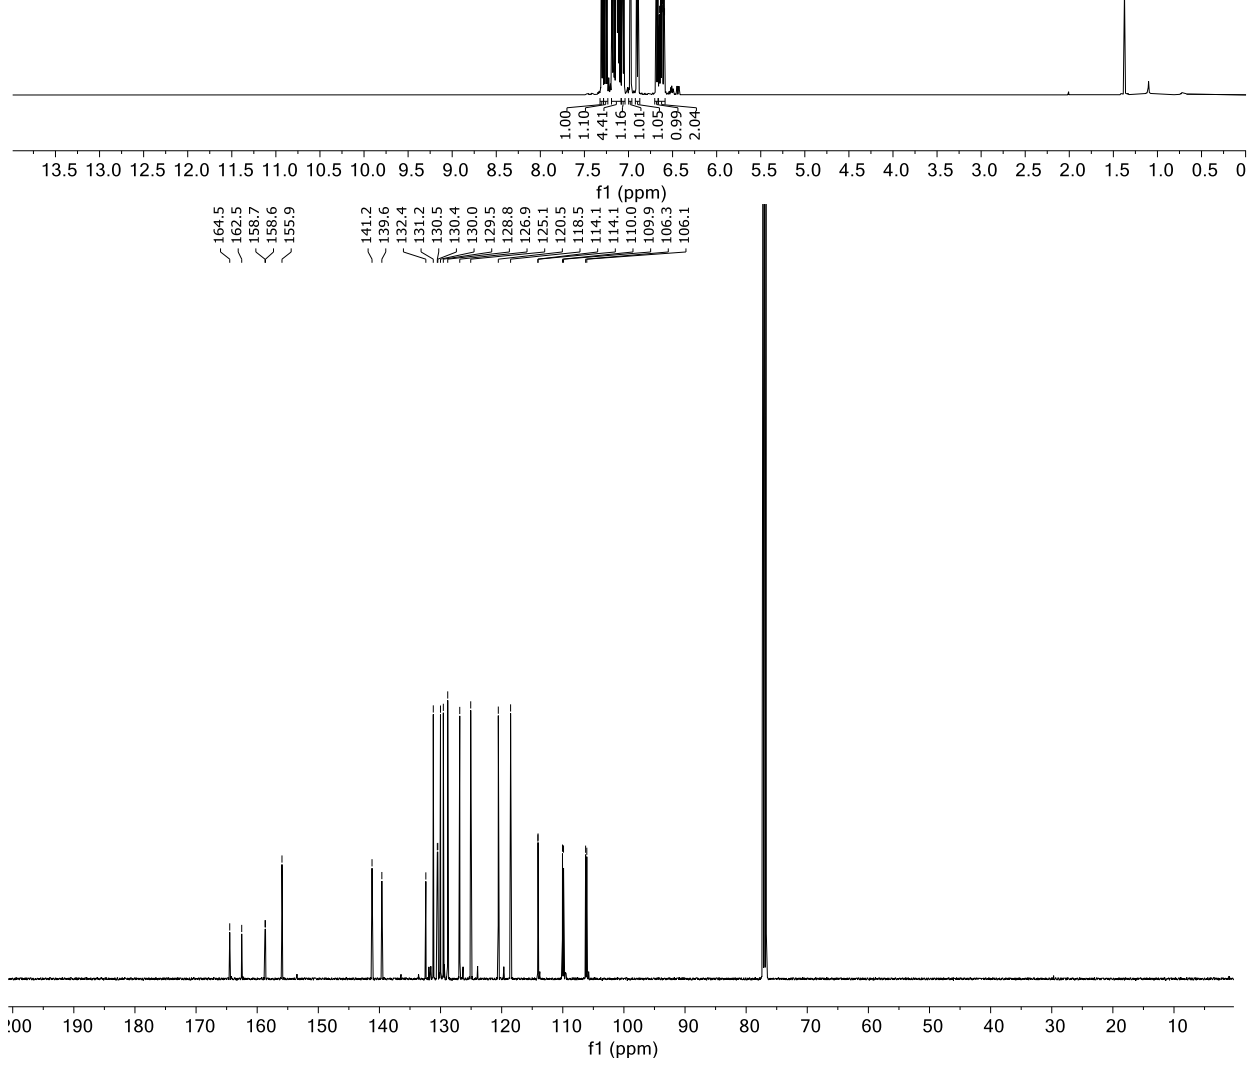

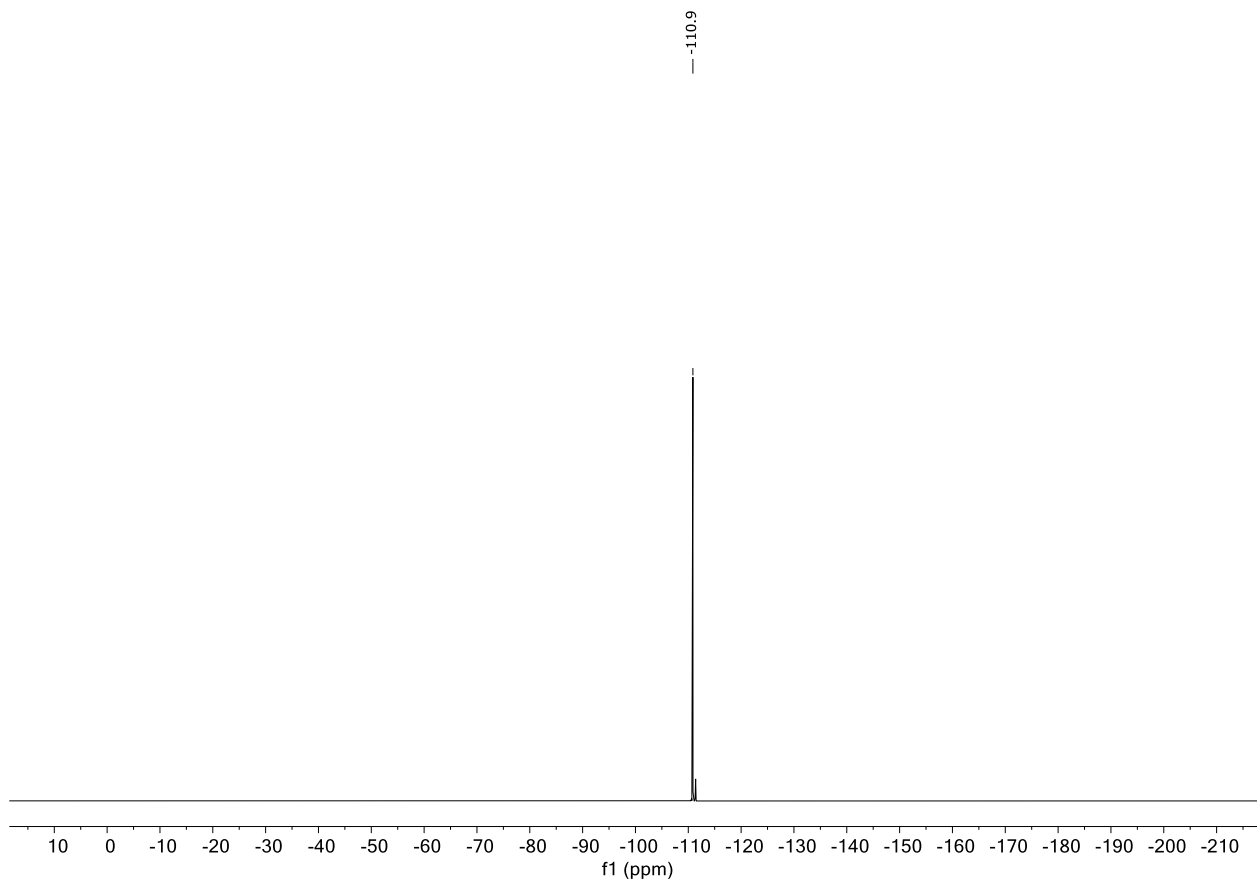

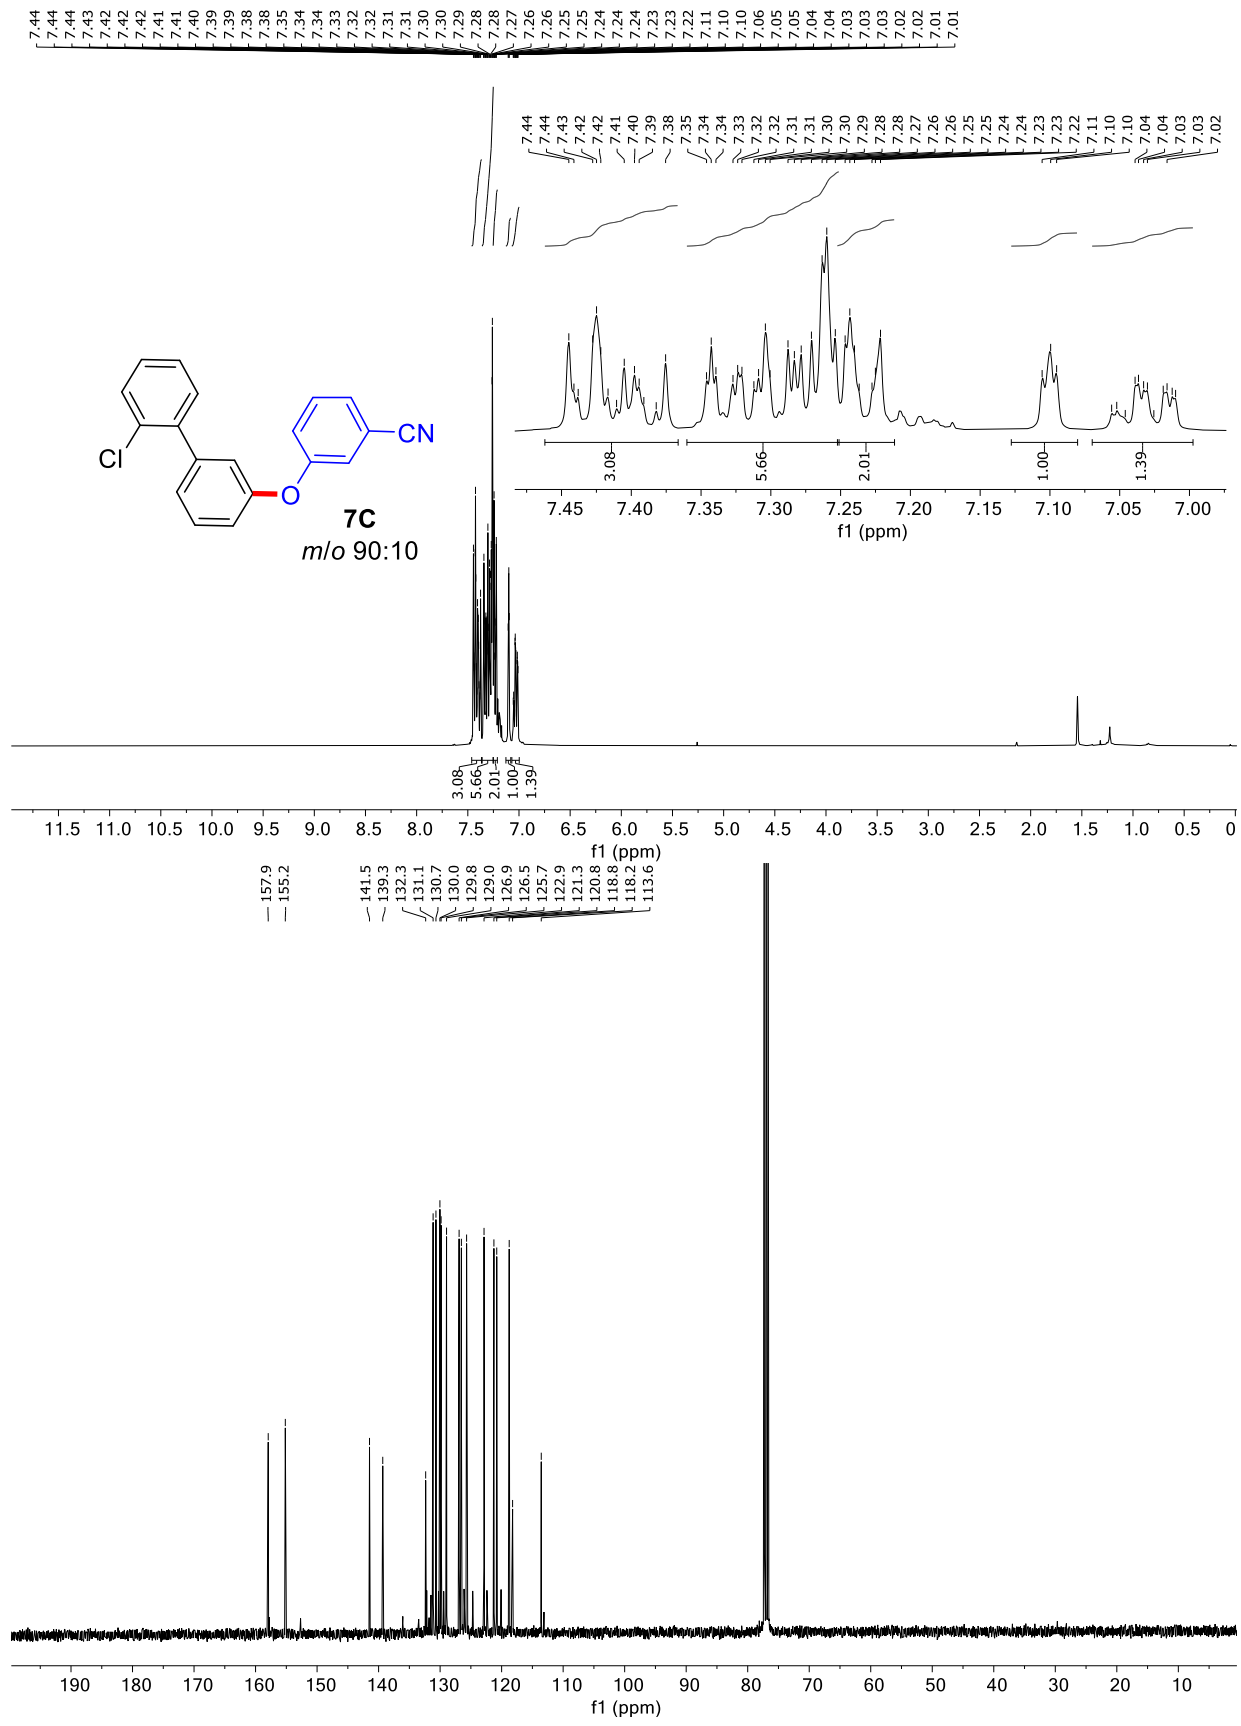

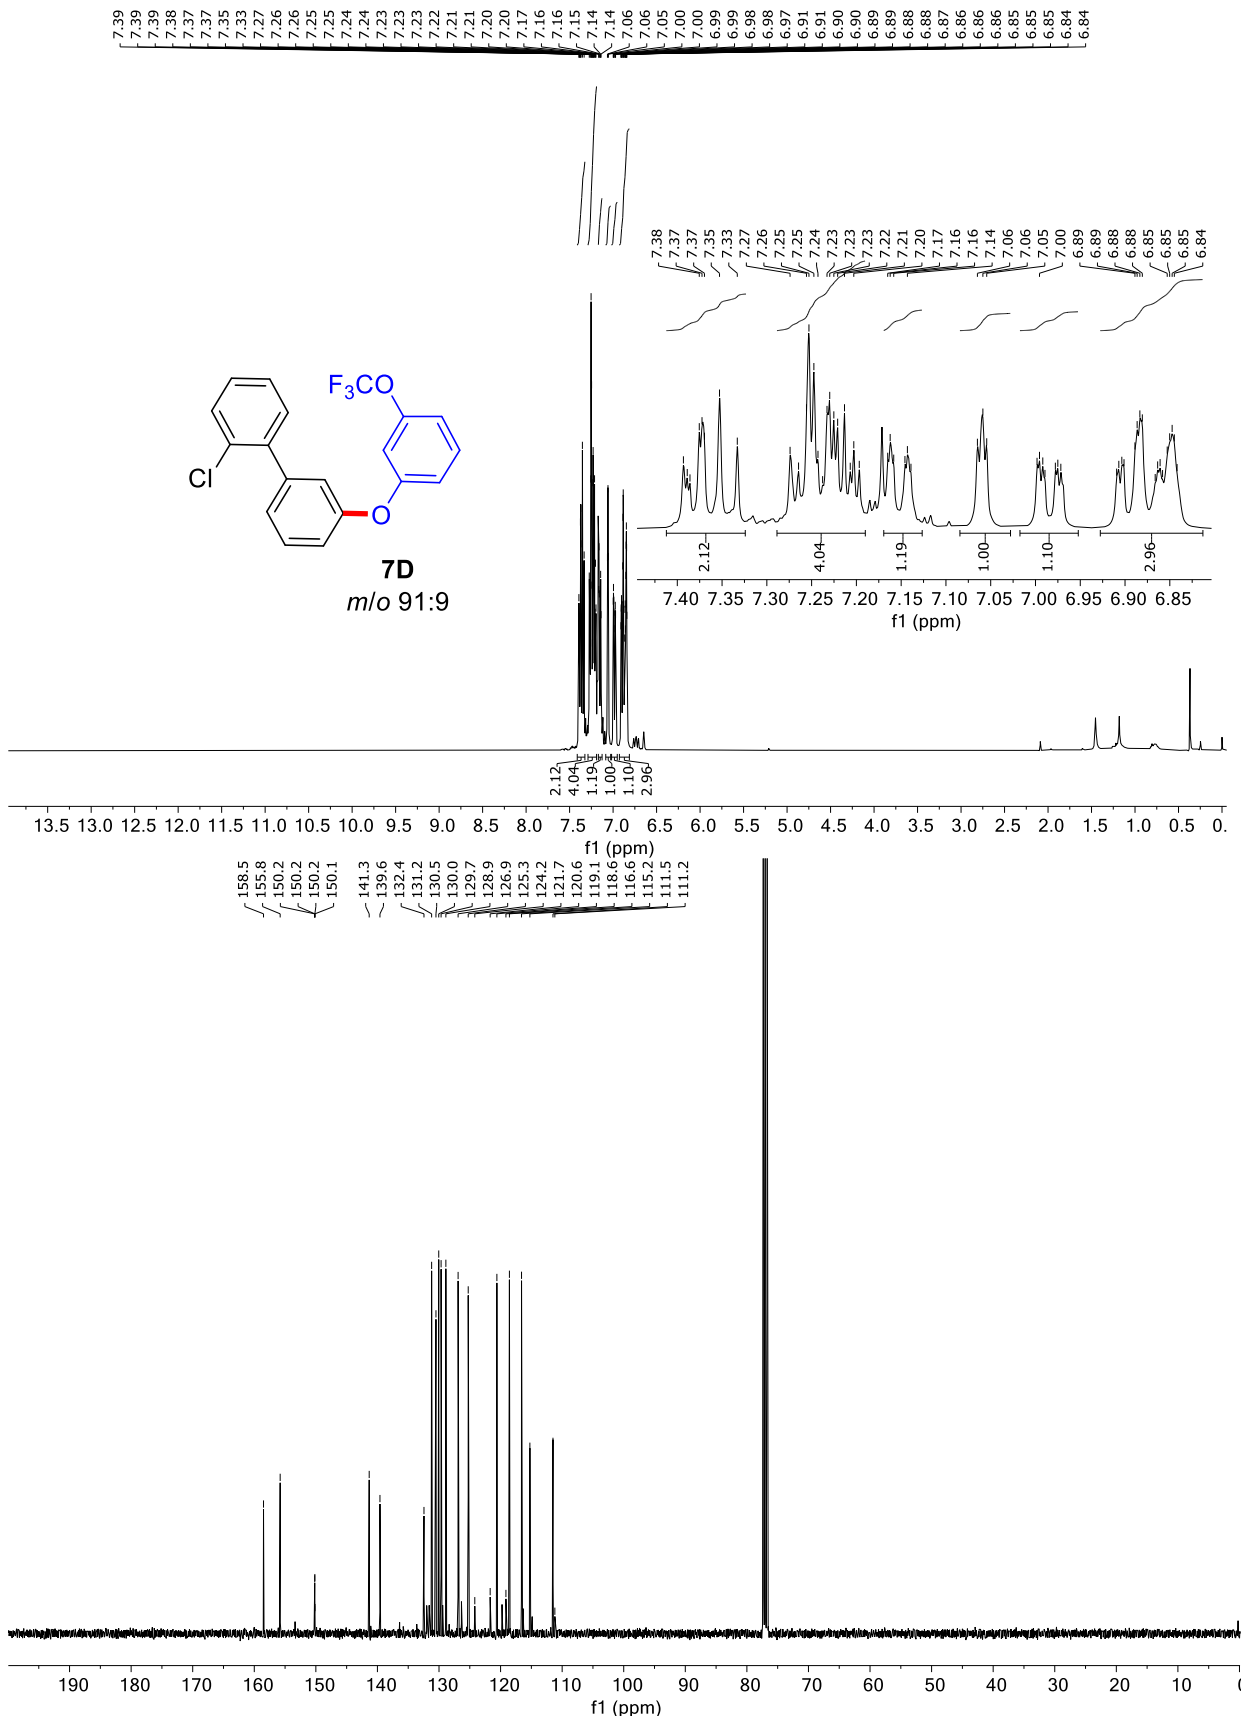

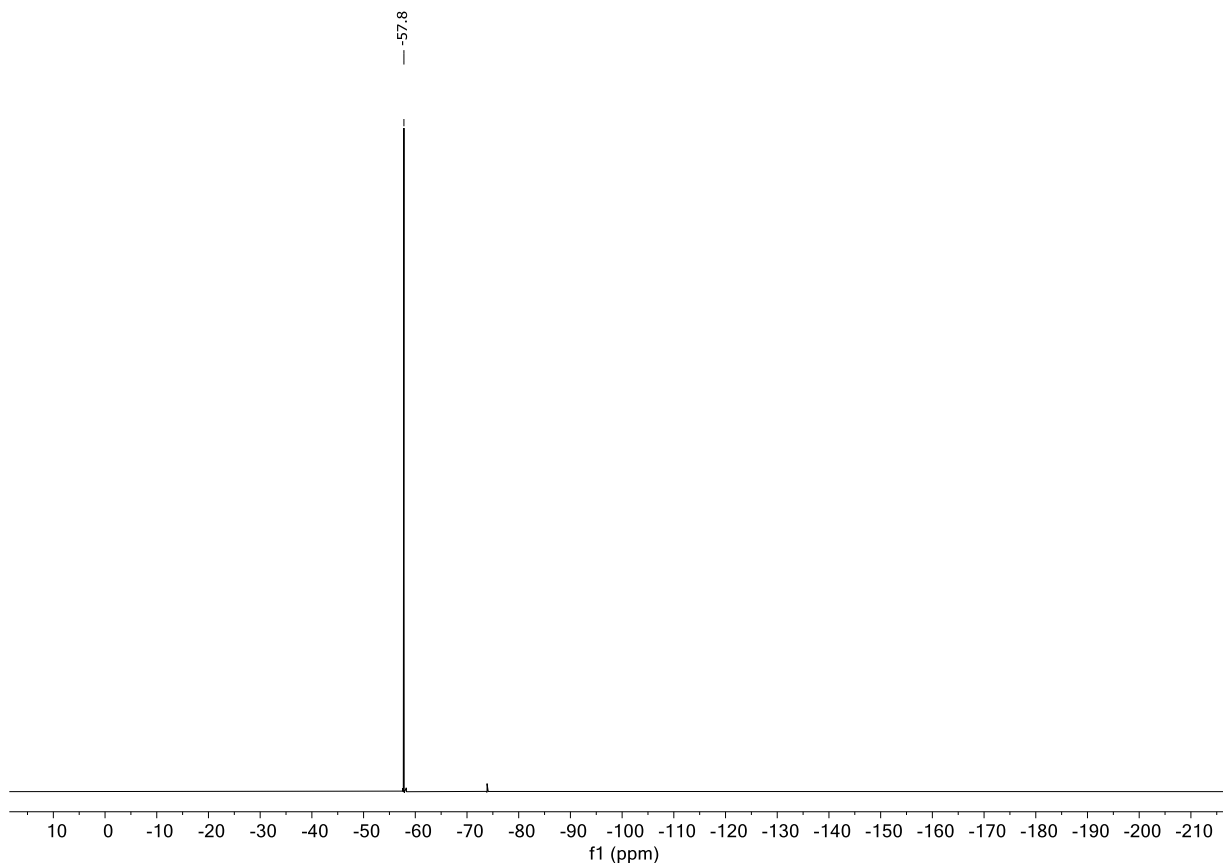

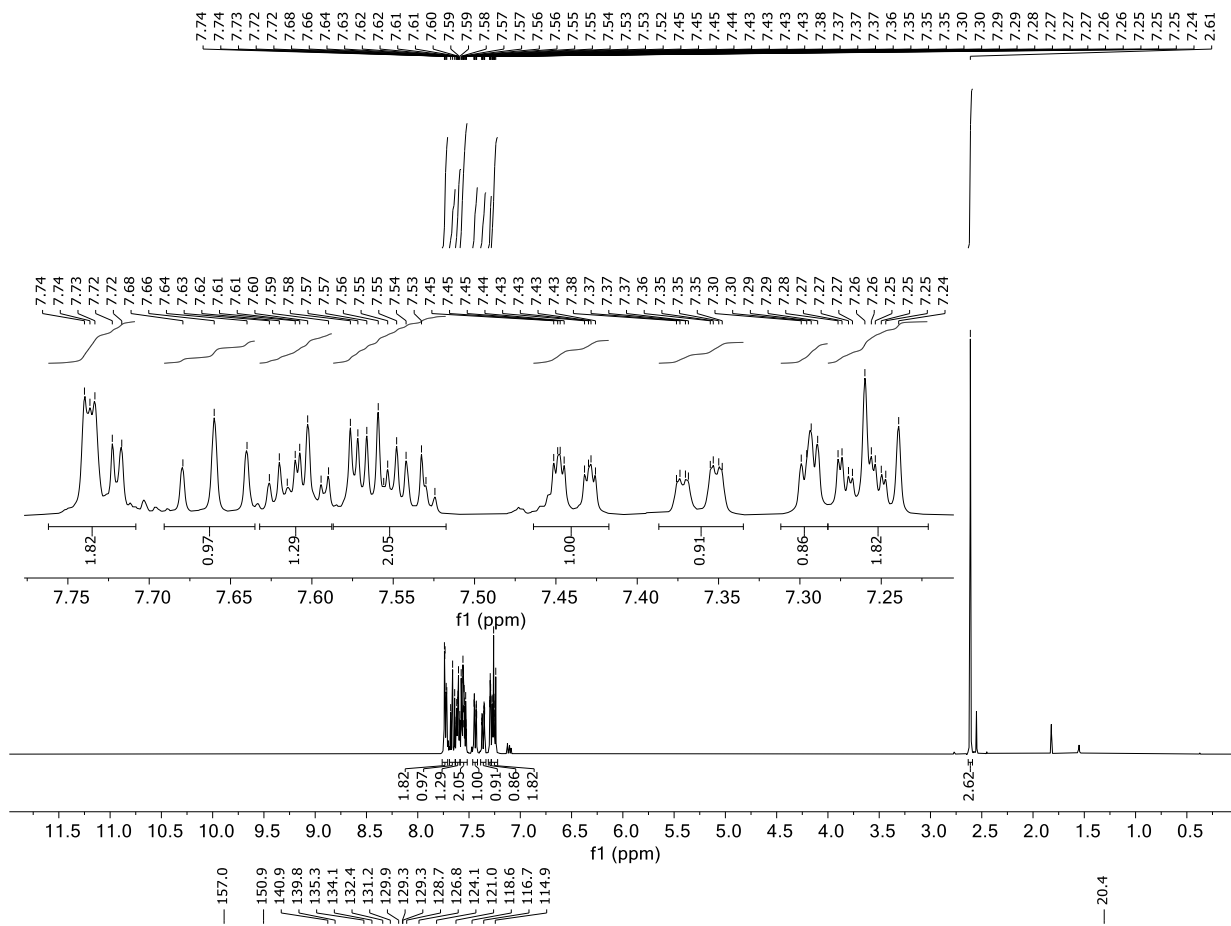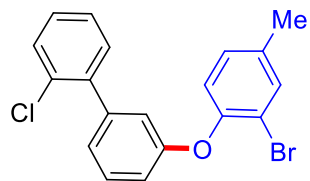

**7E**  
m/o 91:9

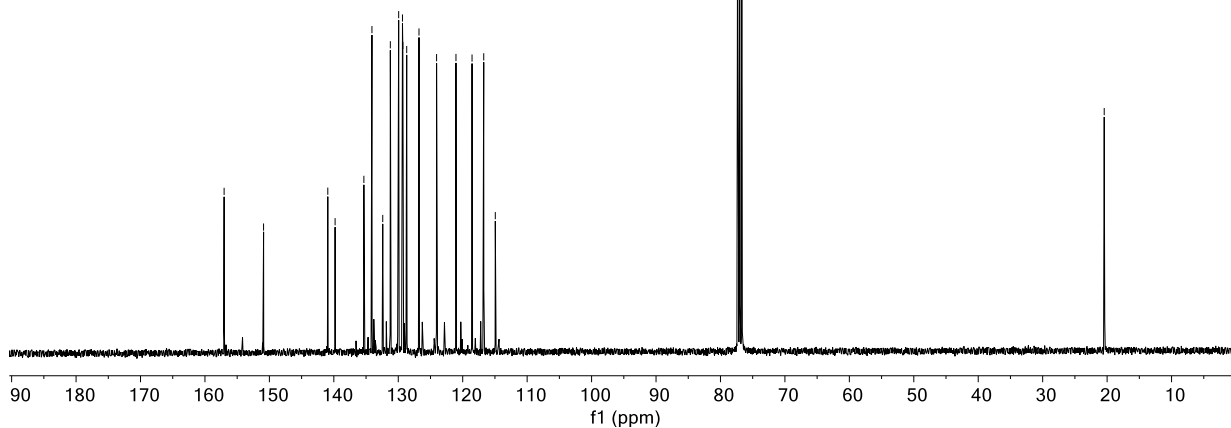

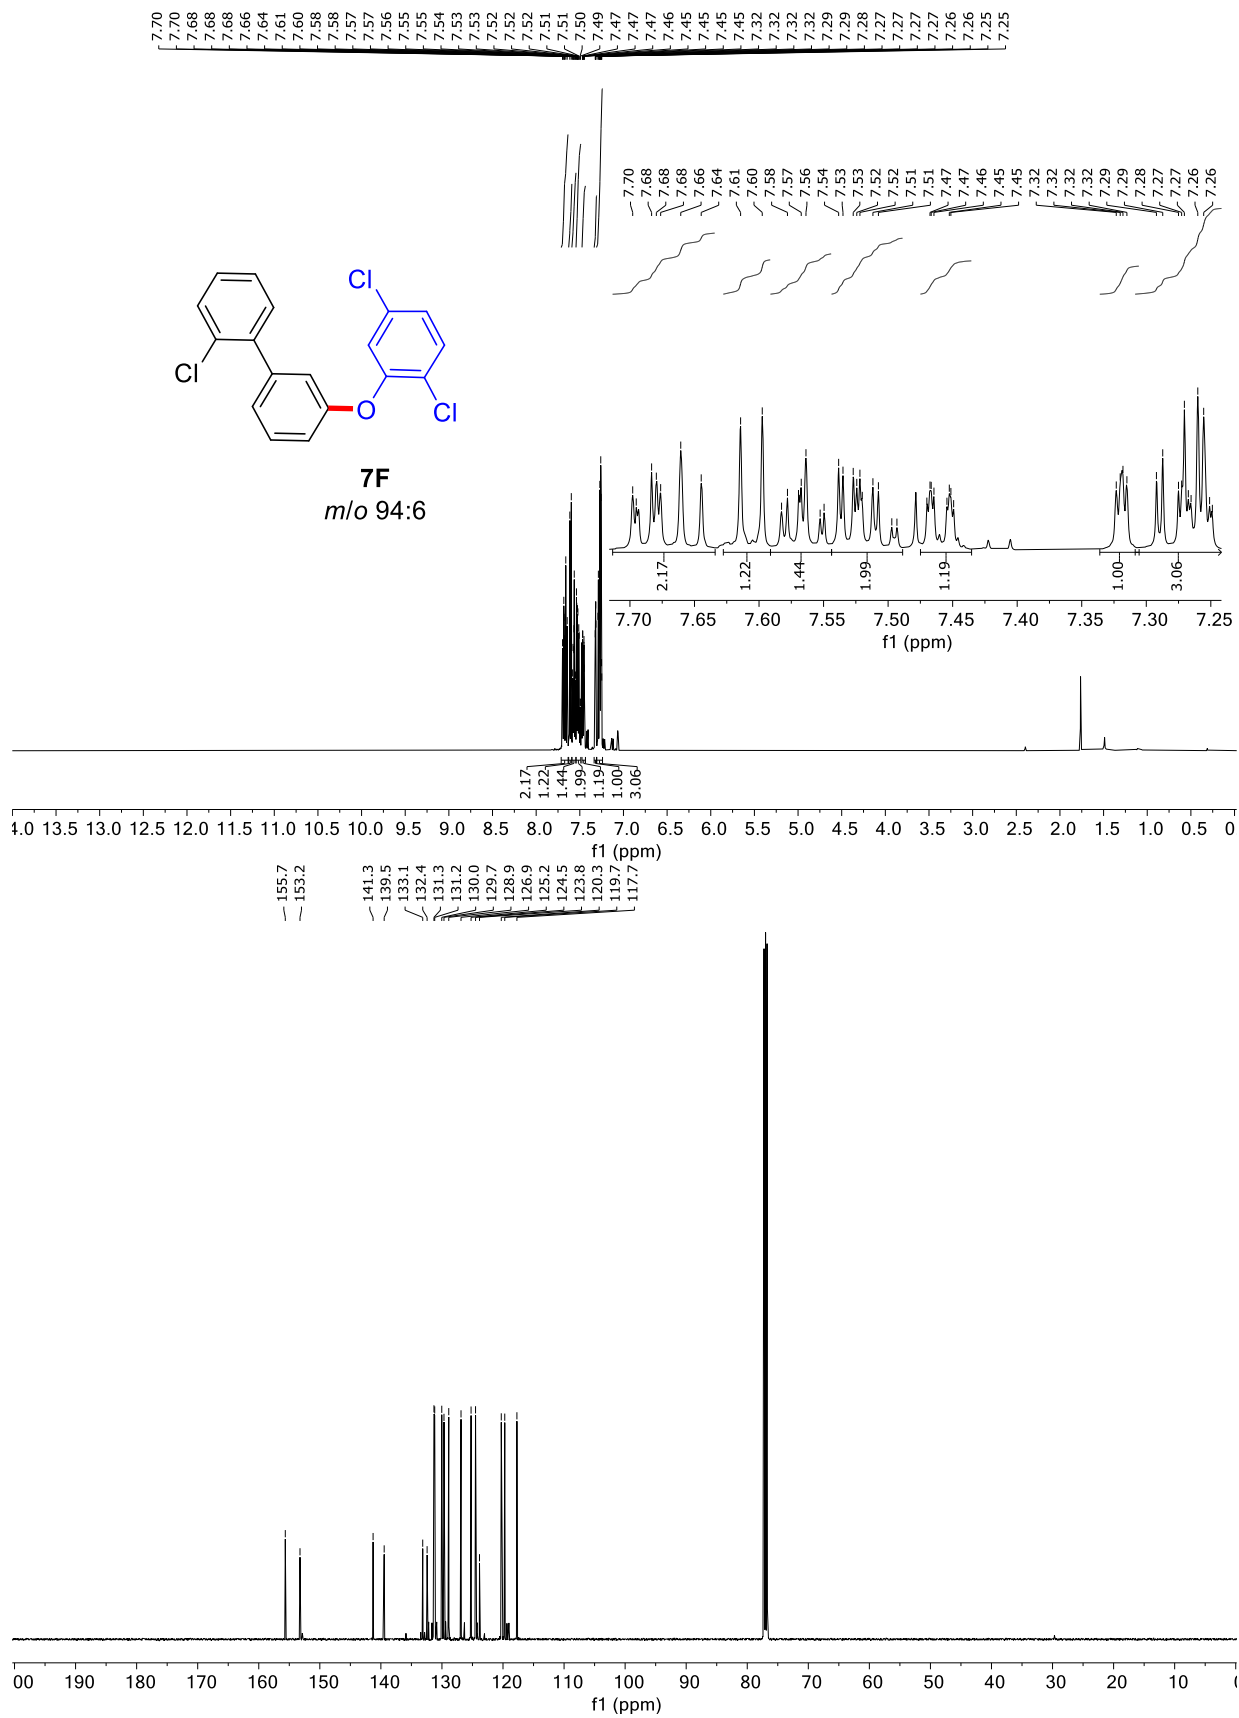



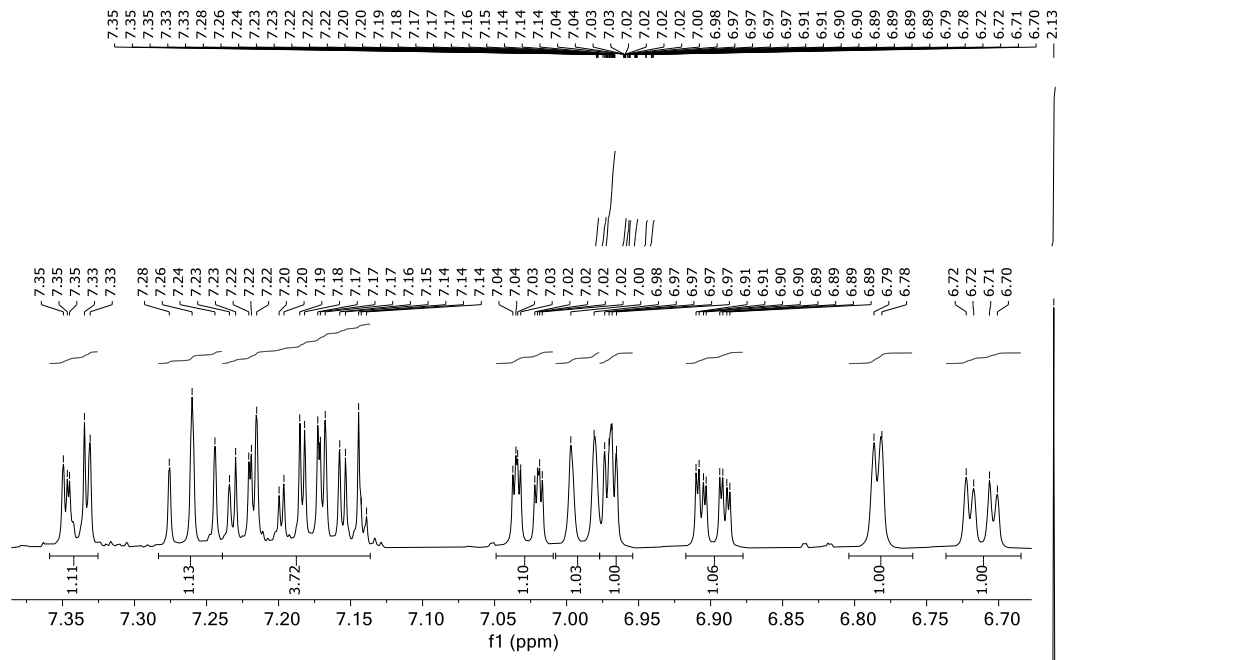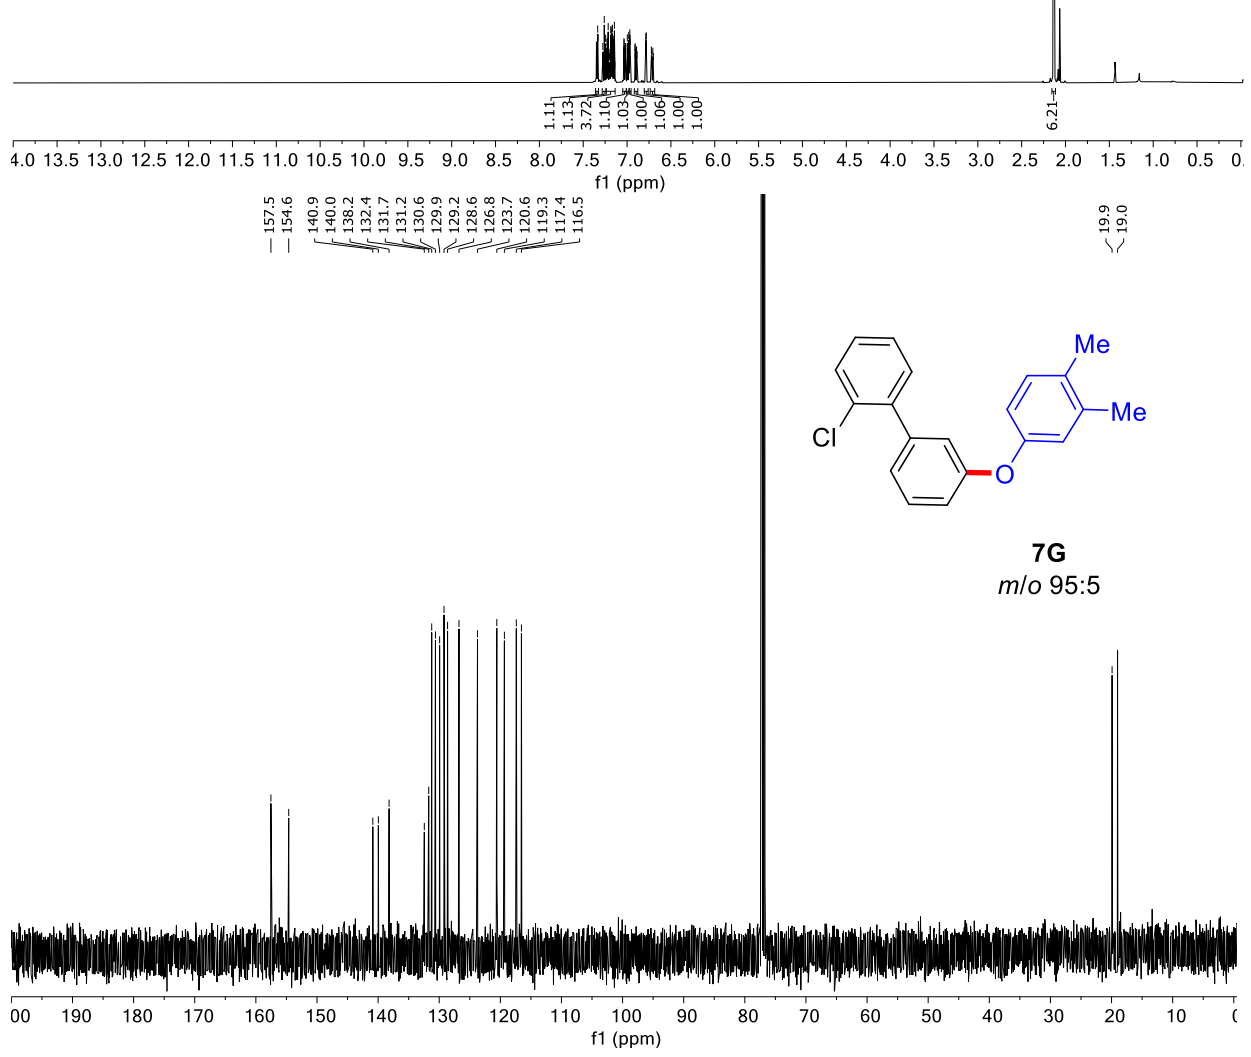

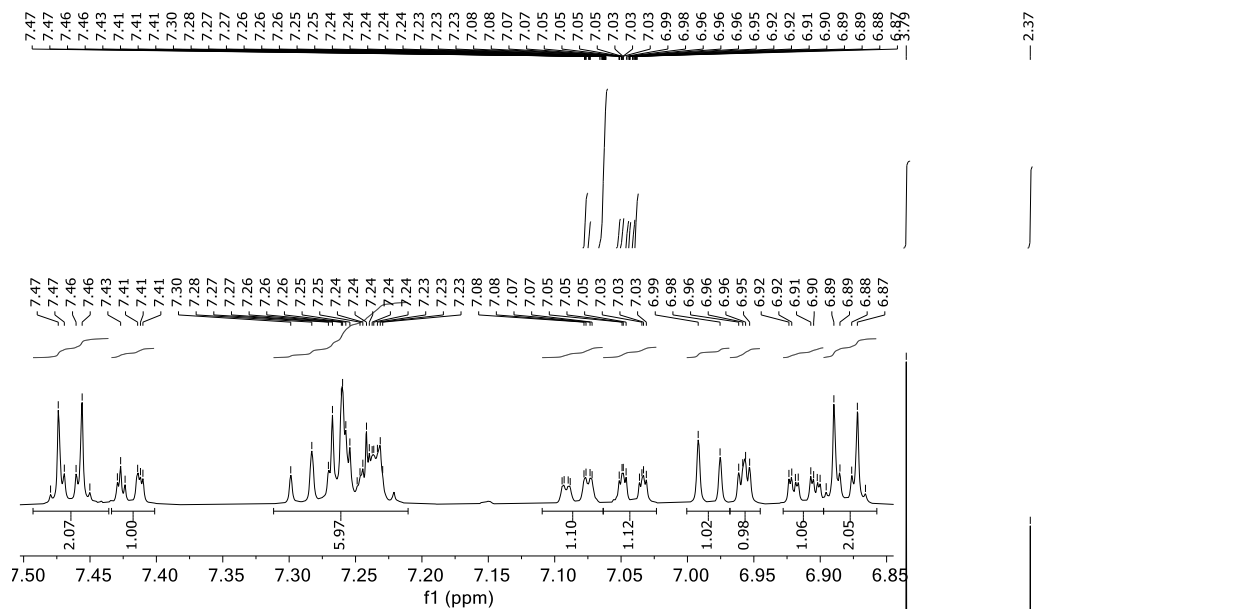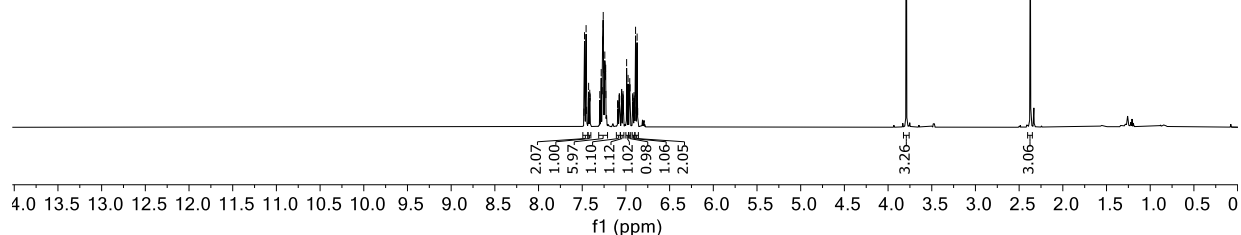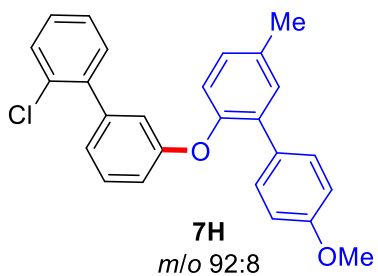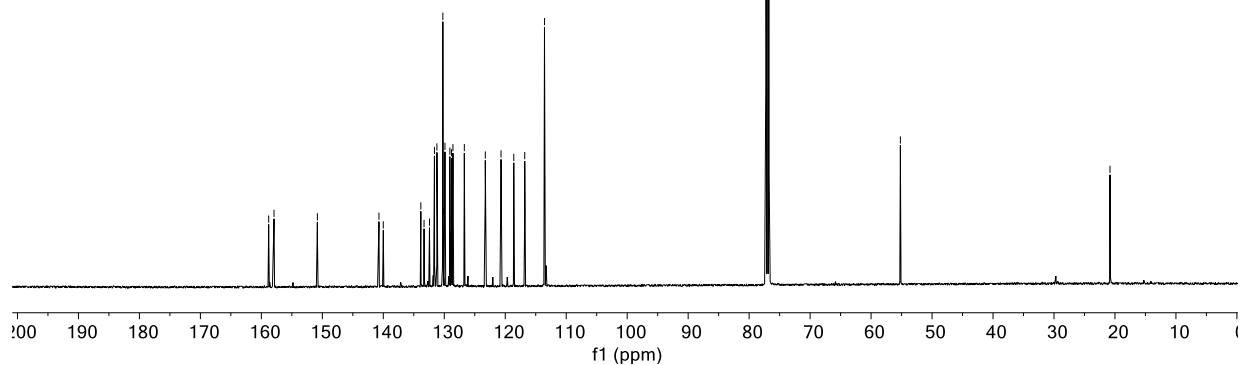

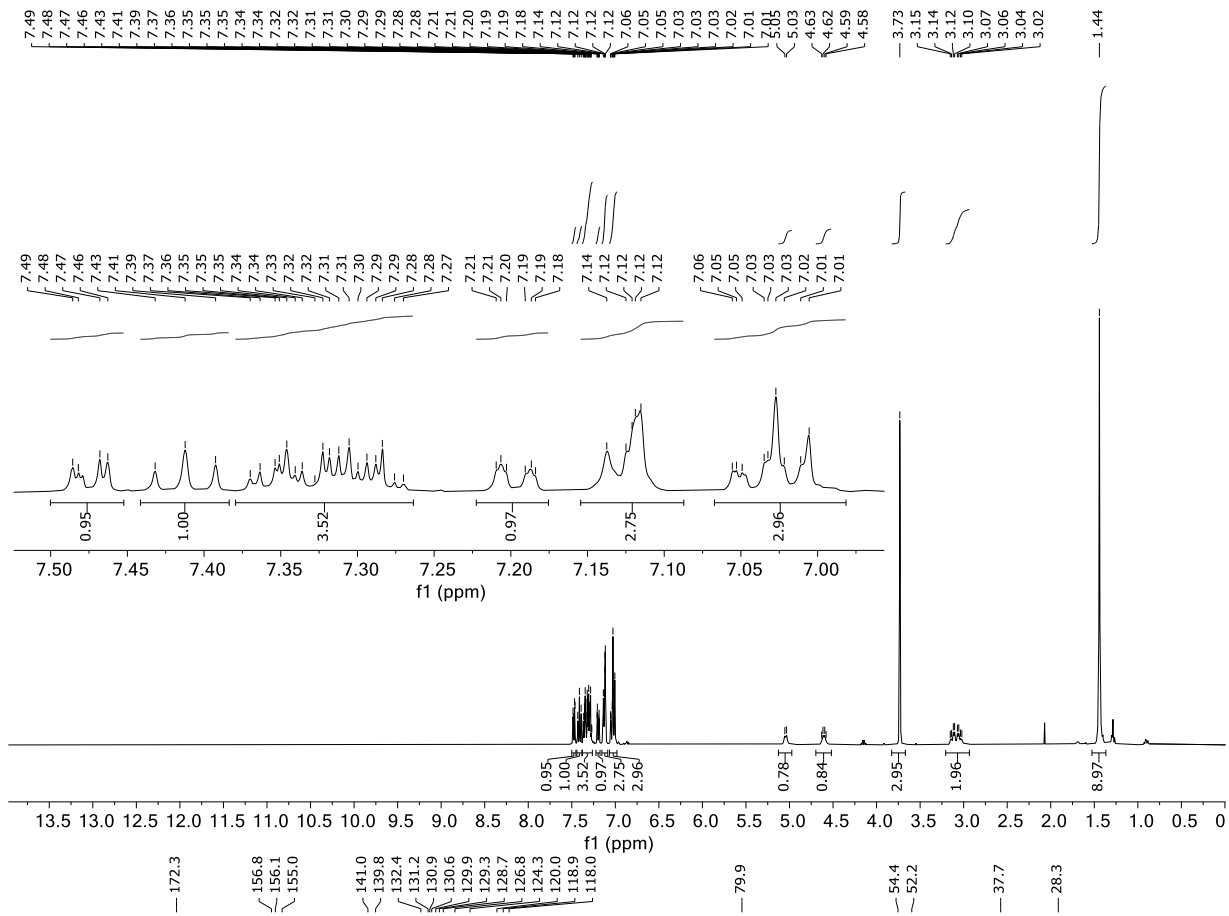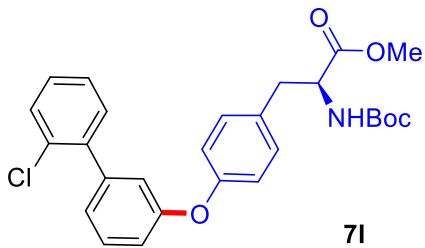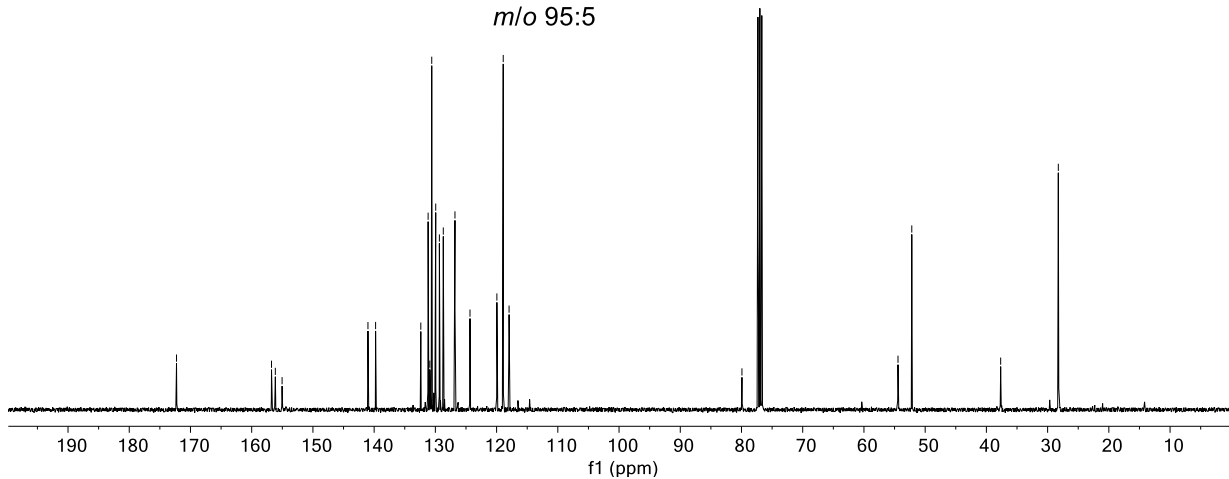

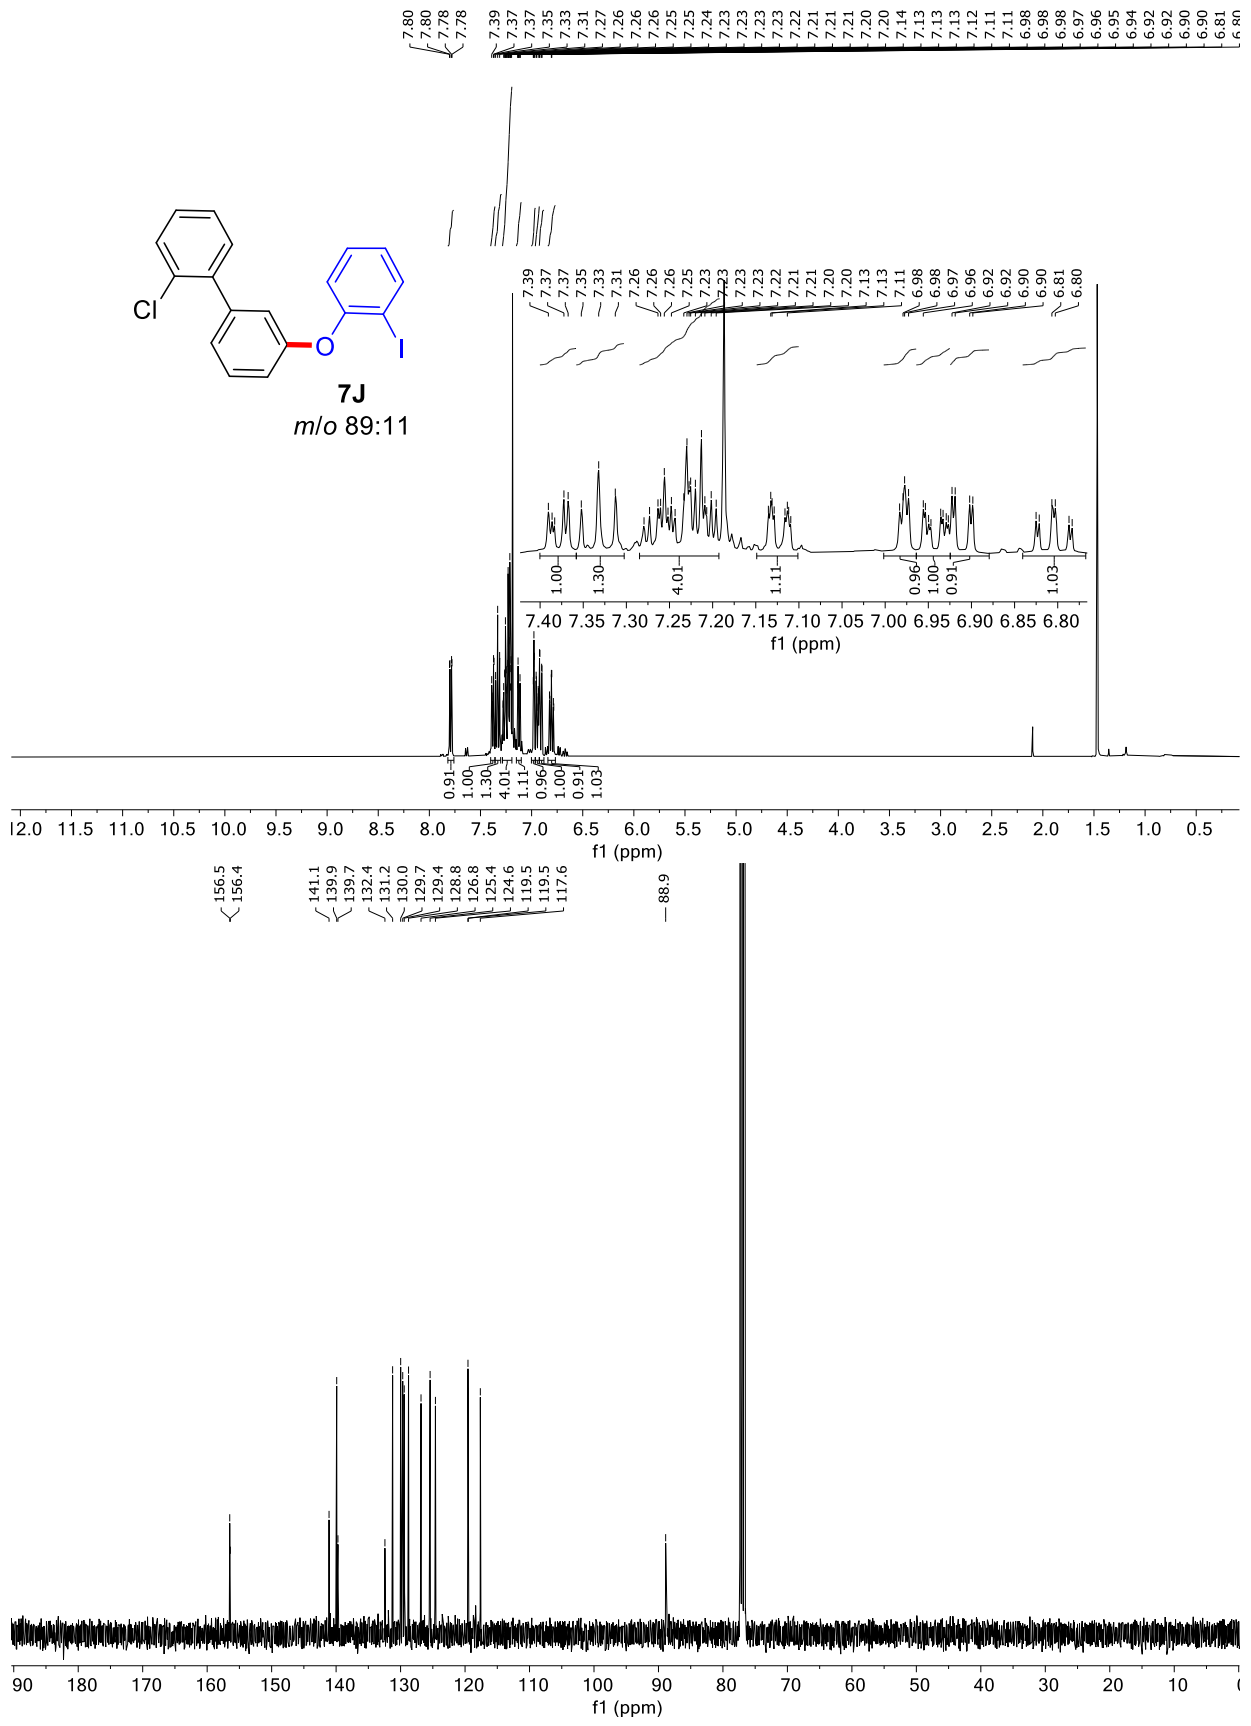

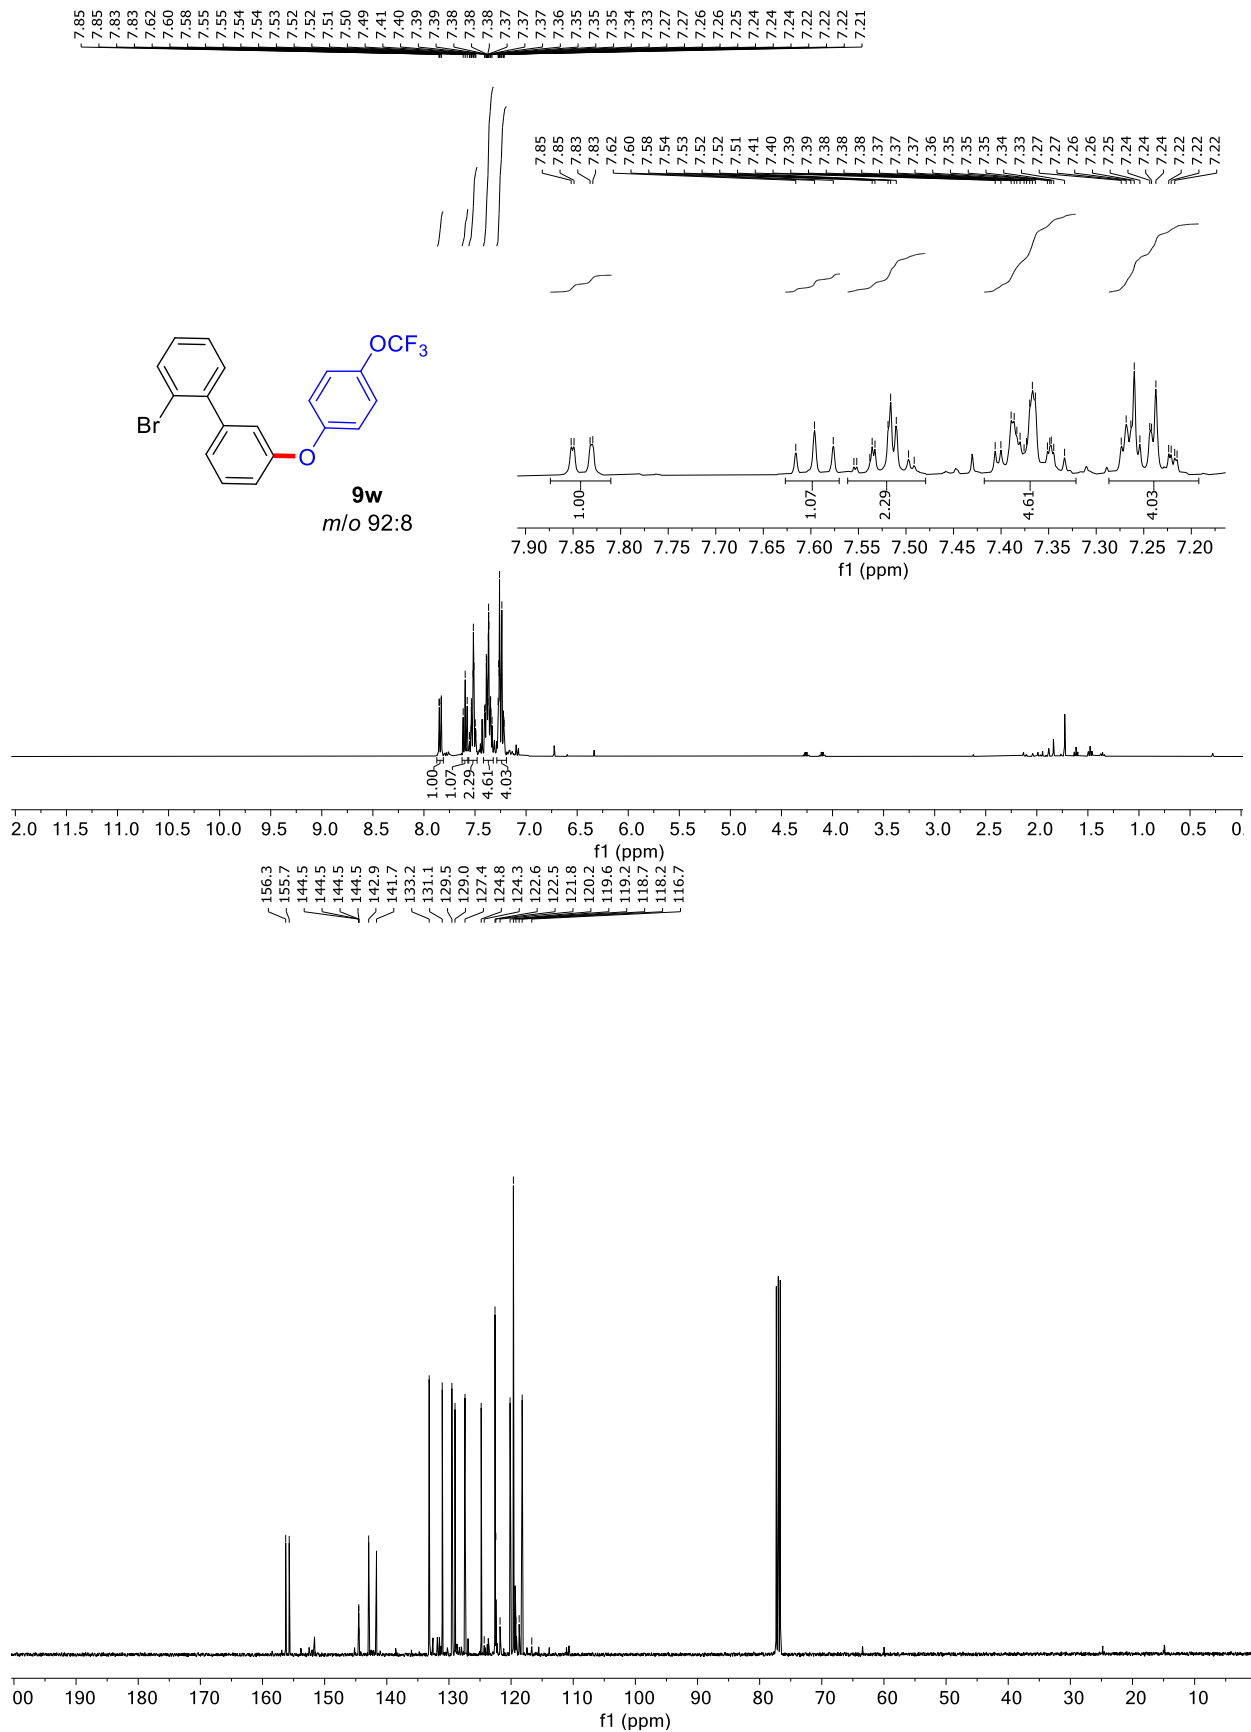

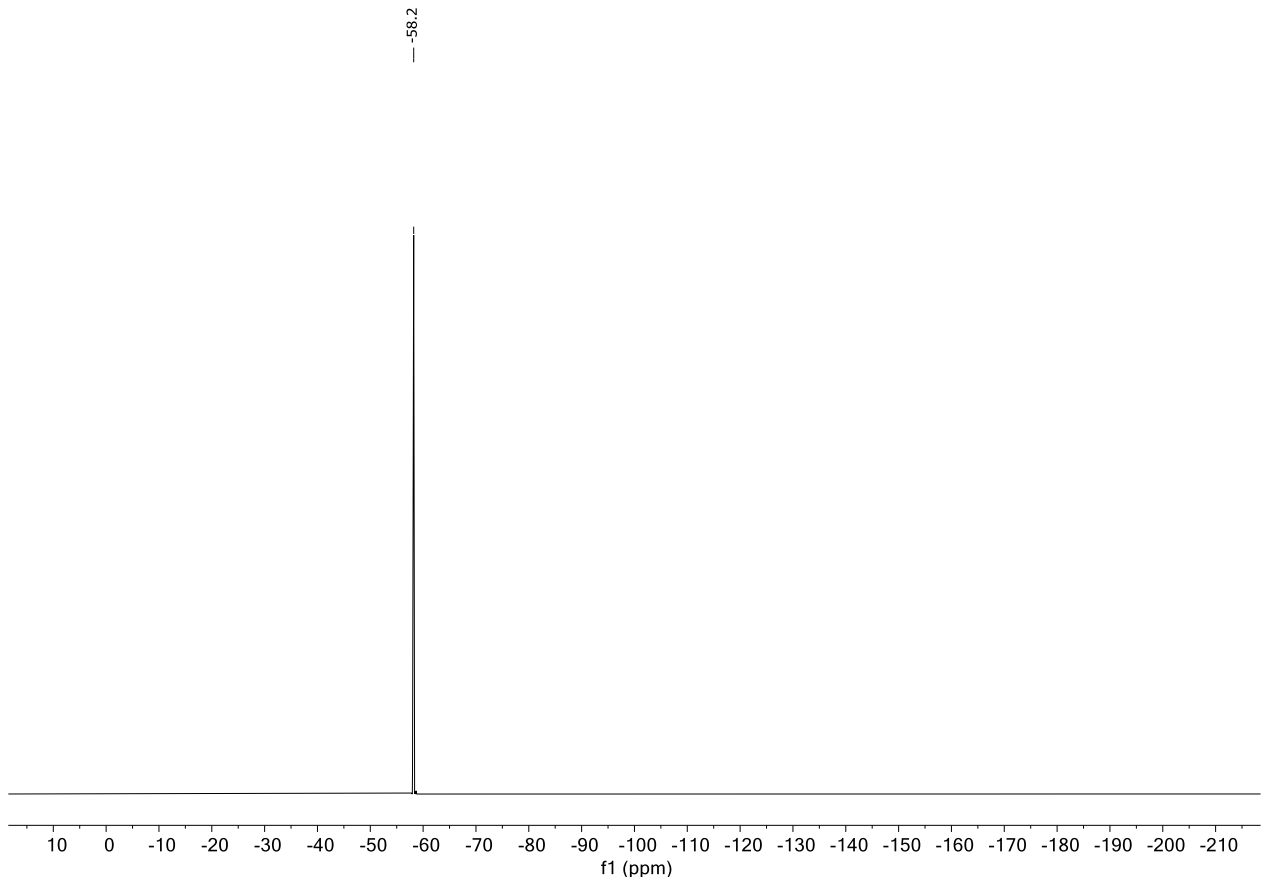

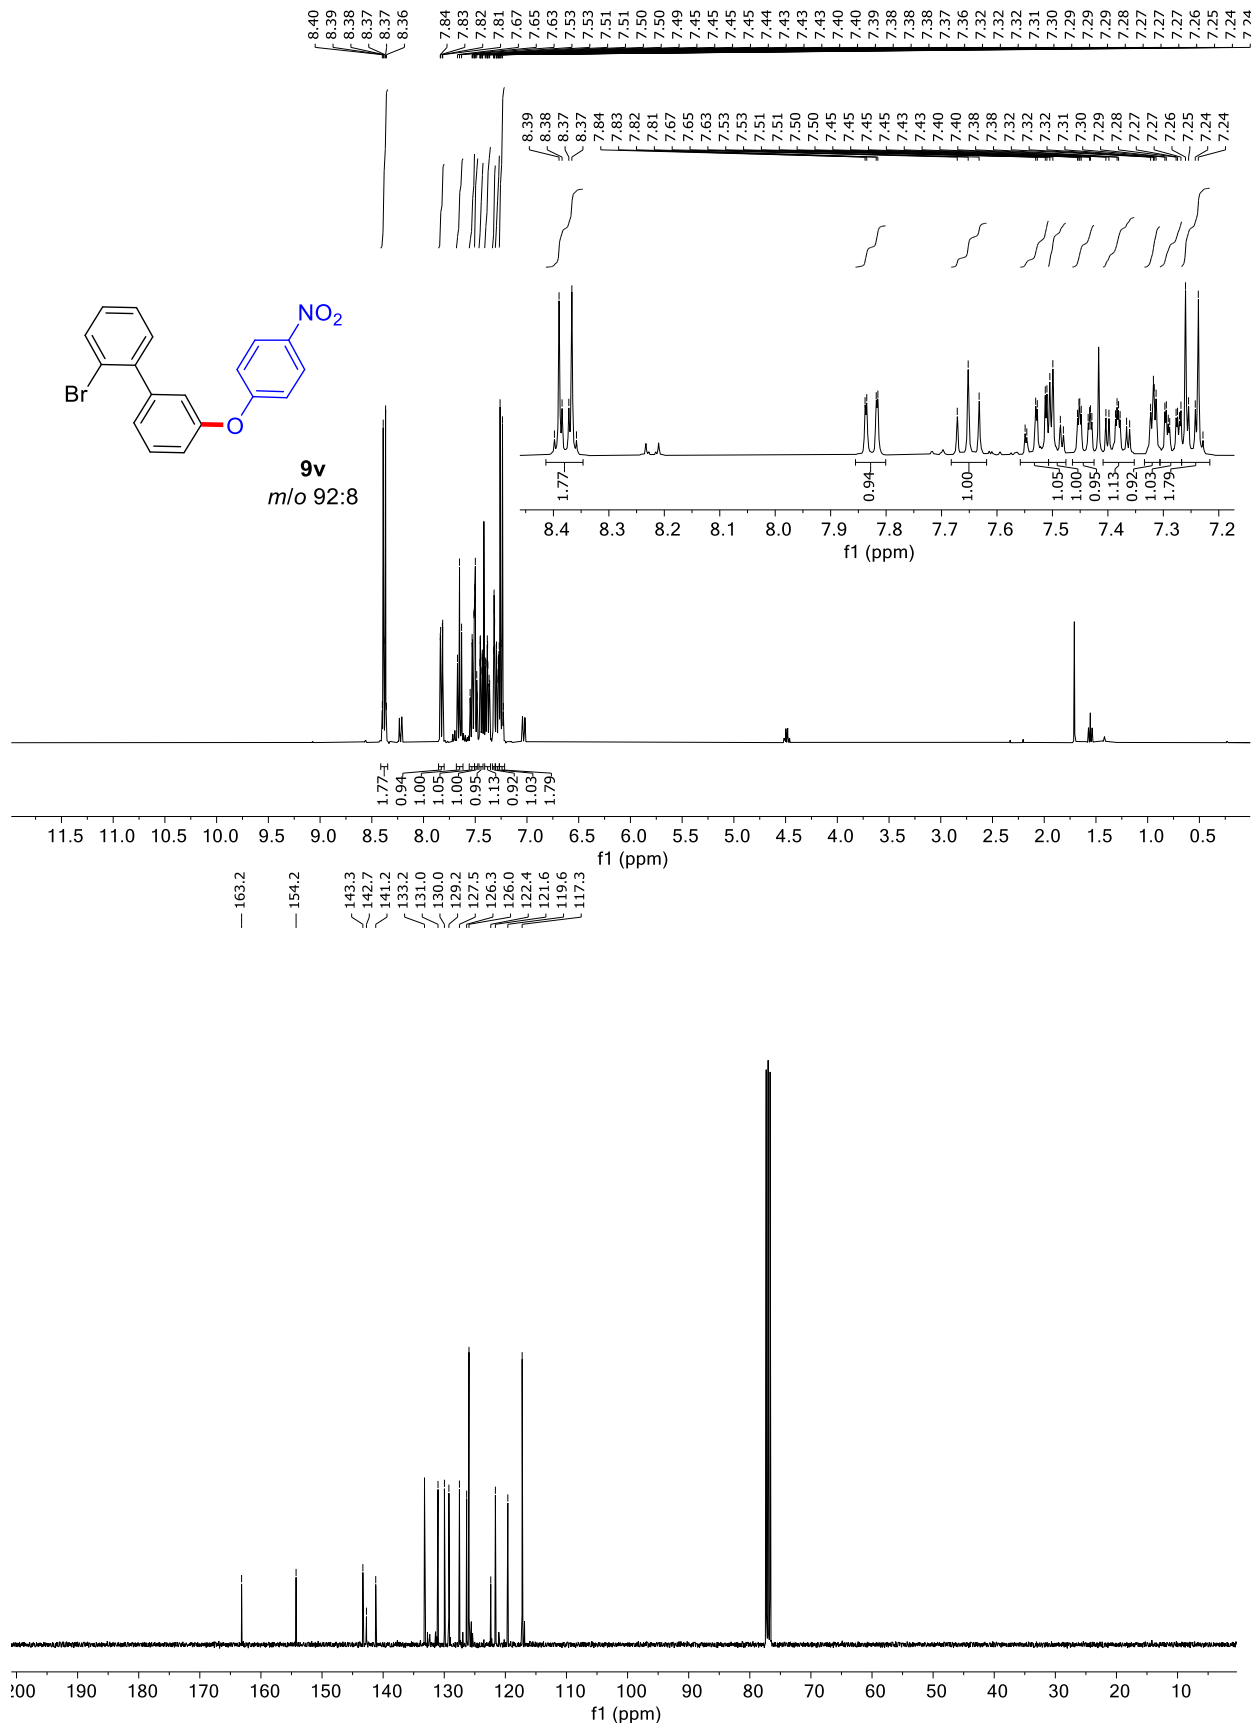

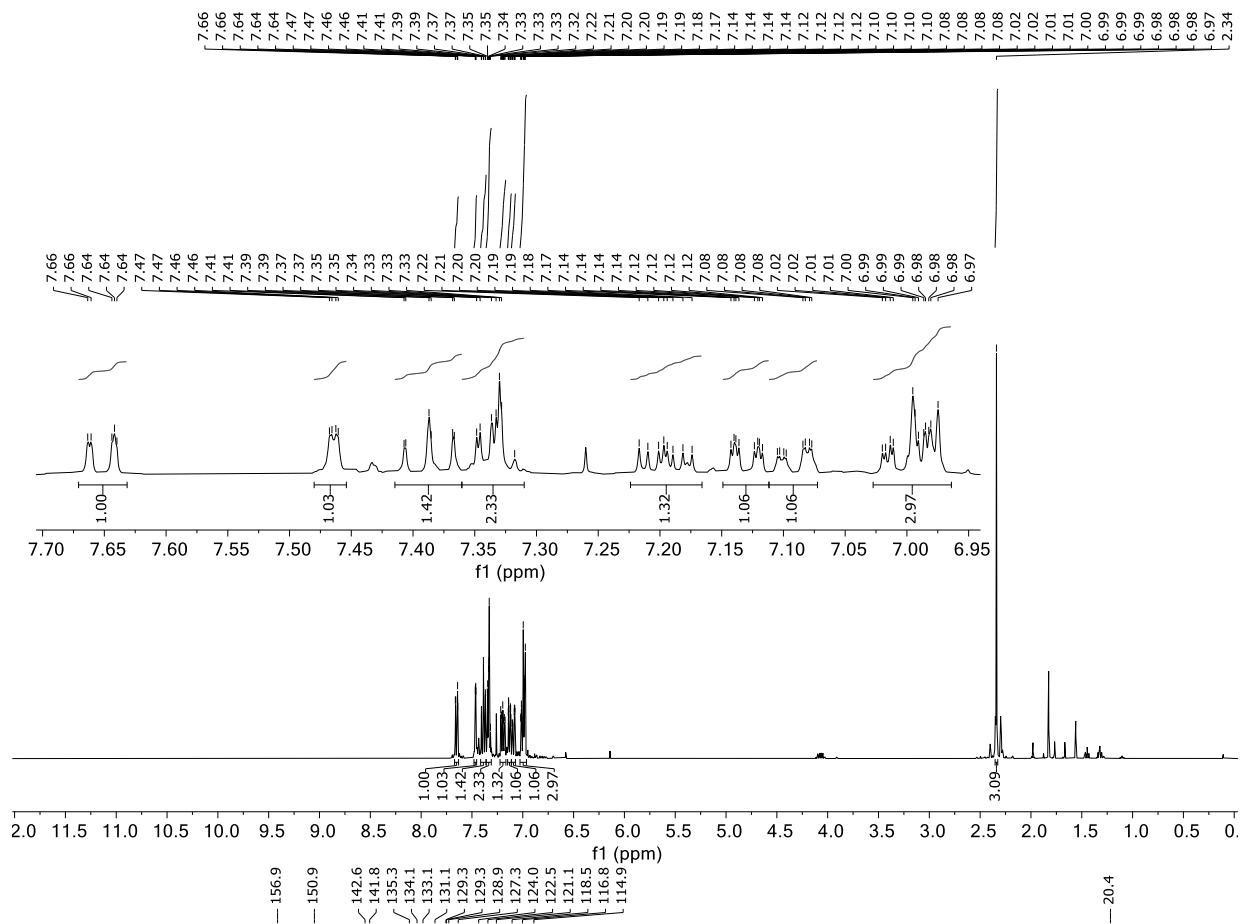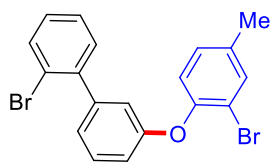

**9E**  
m/o 94:6

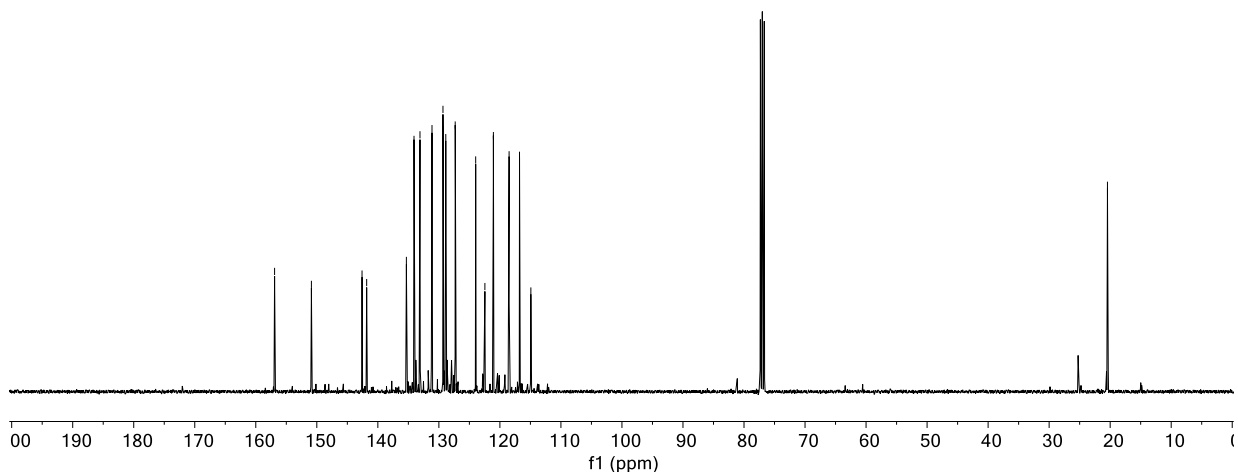



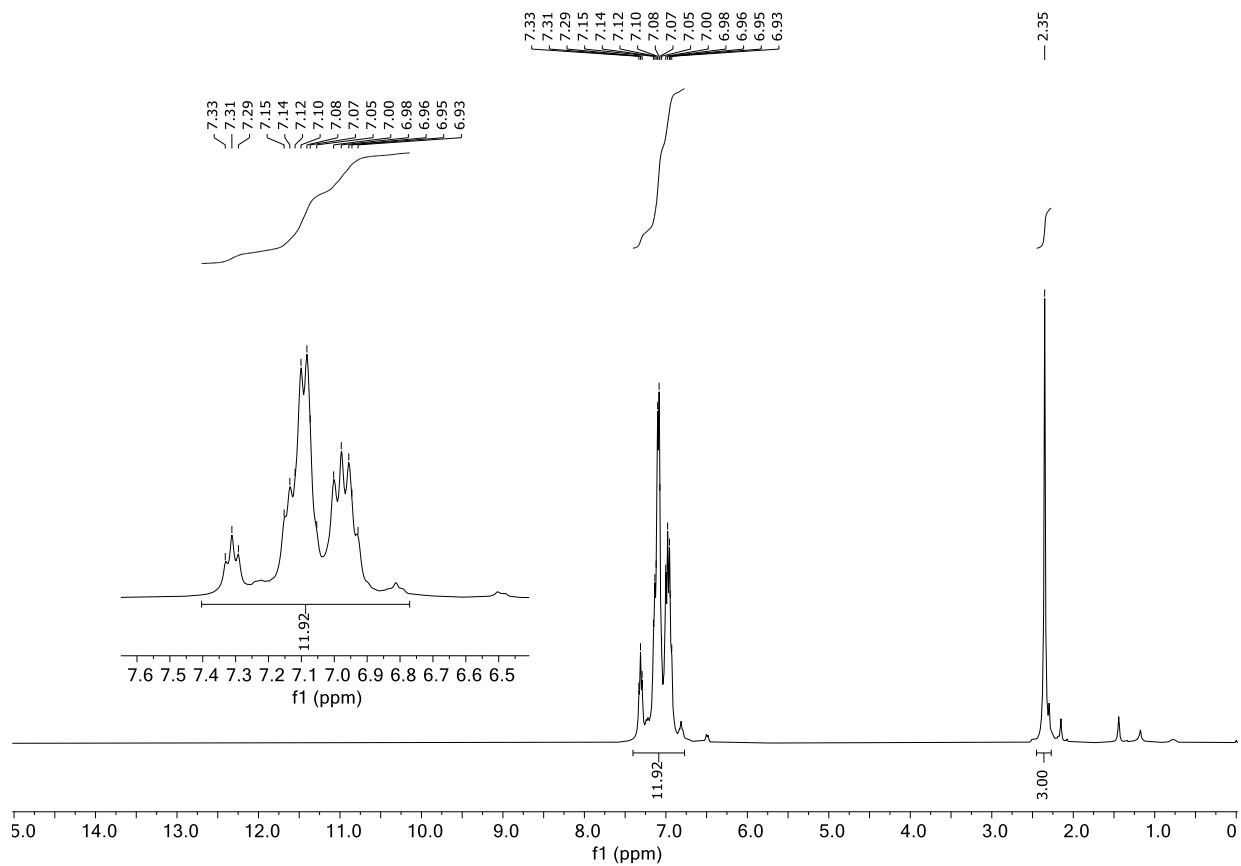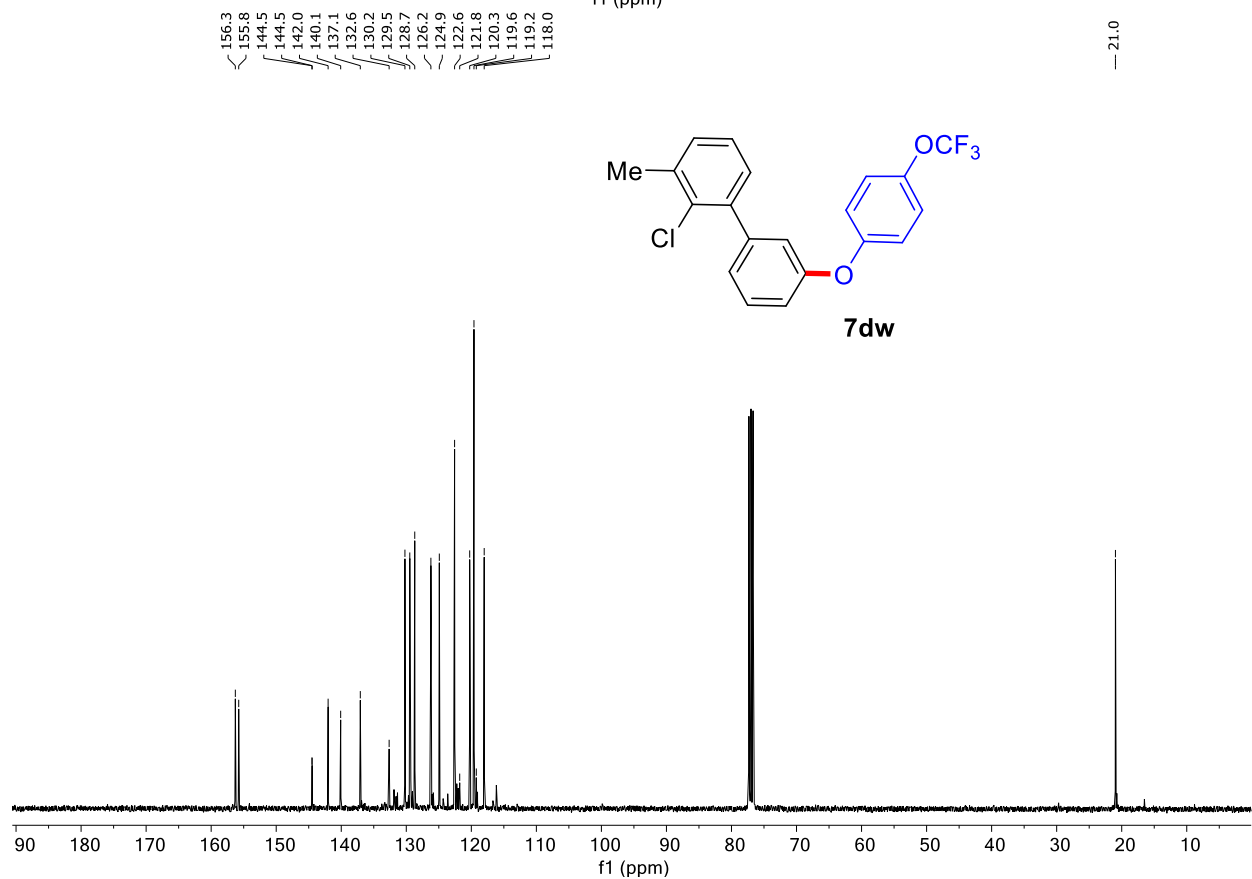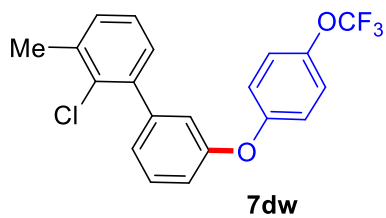

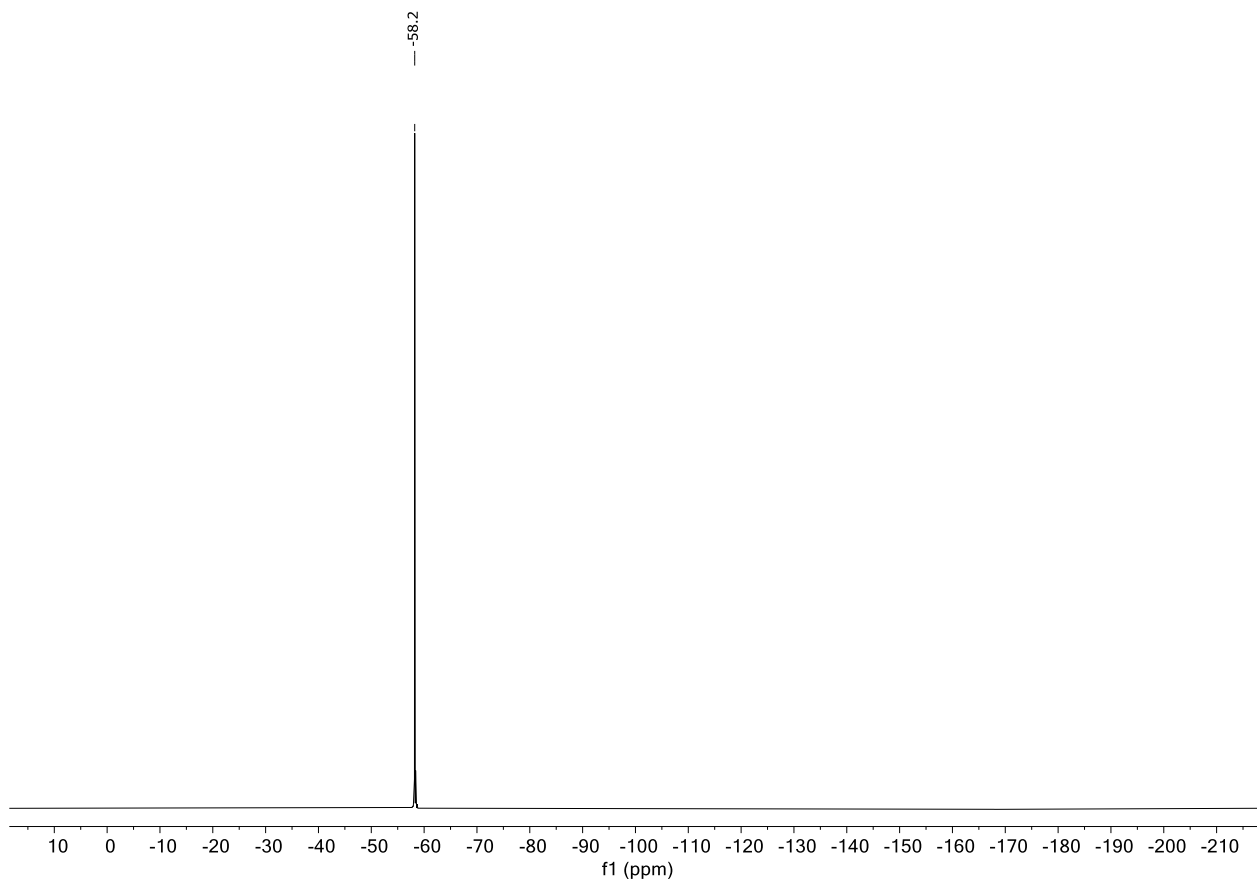

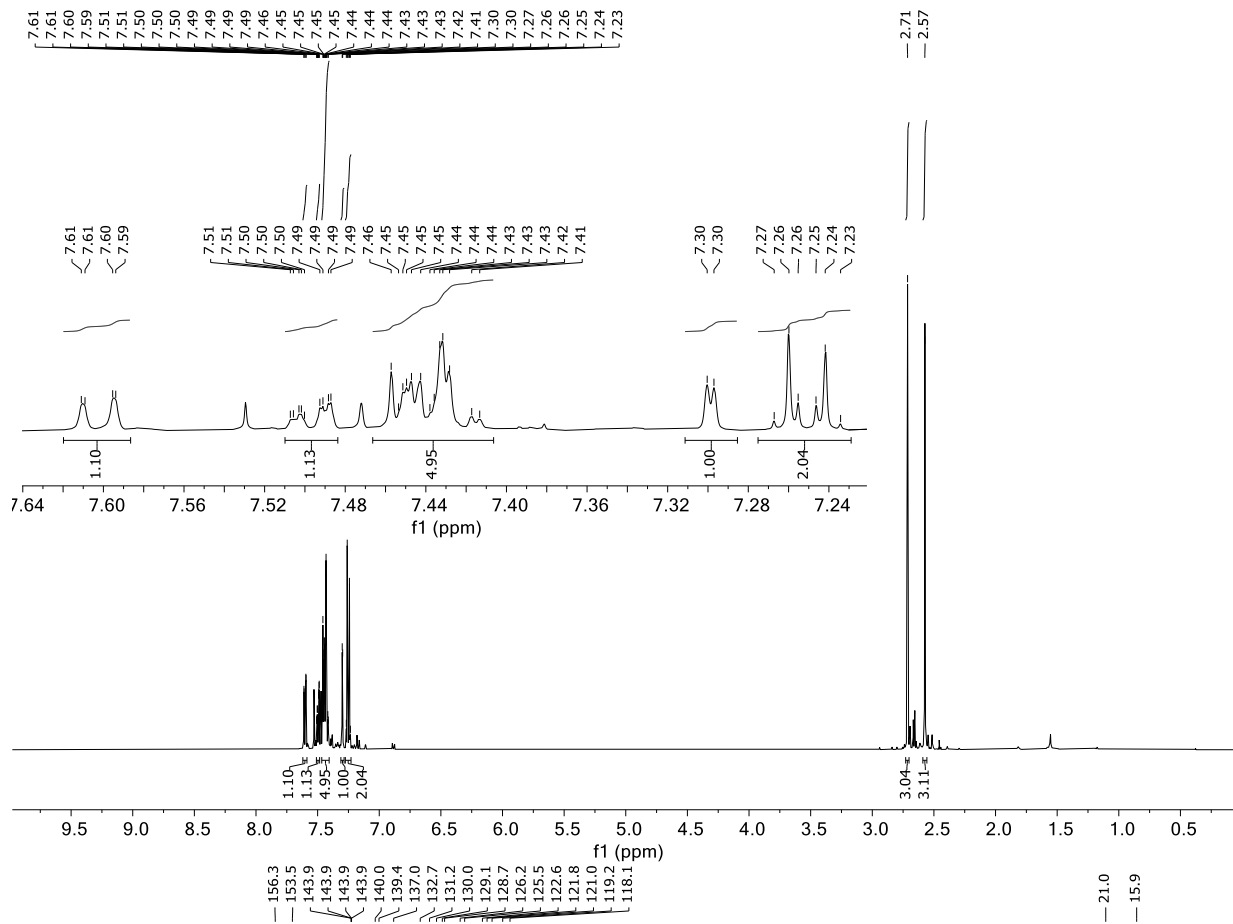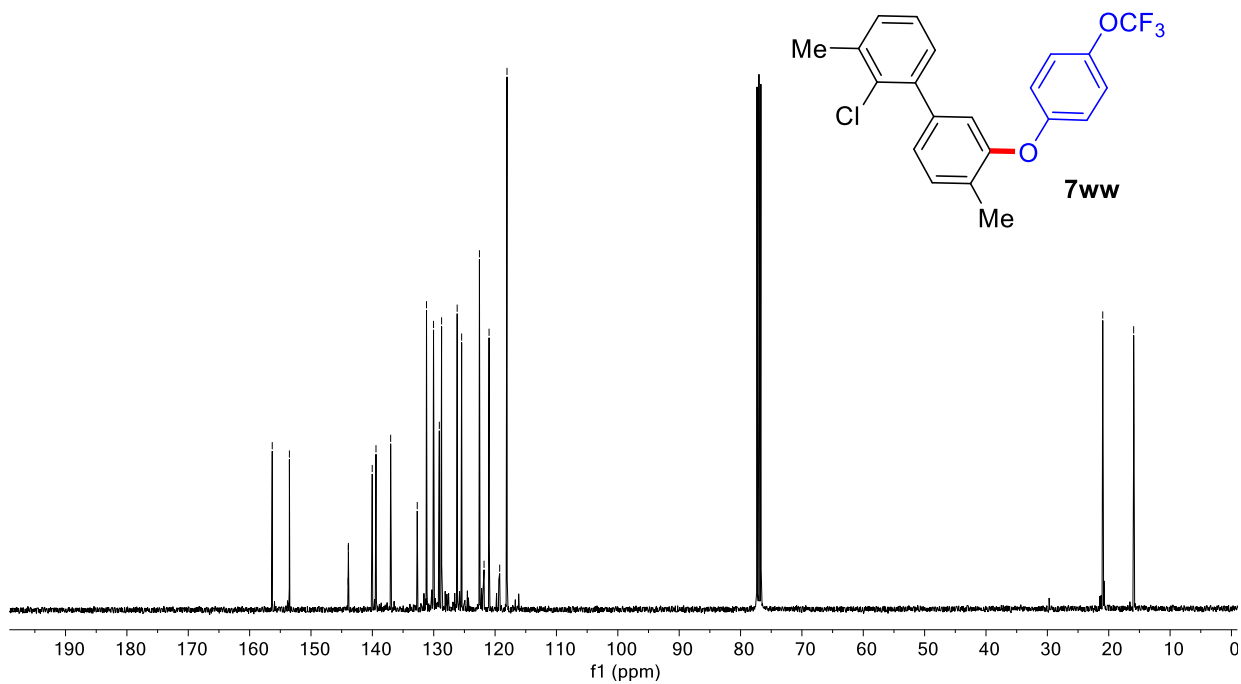

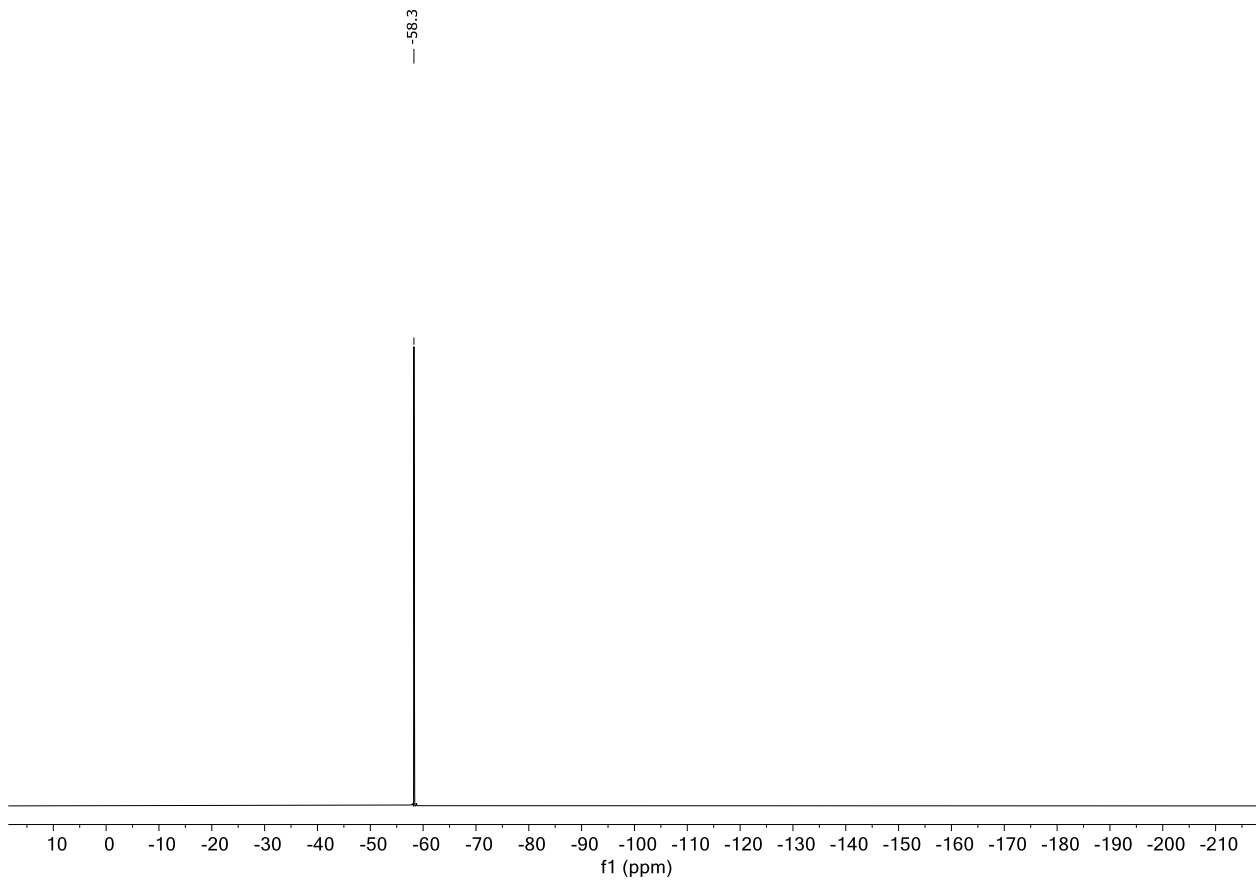

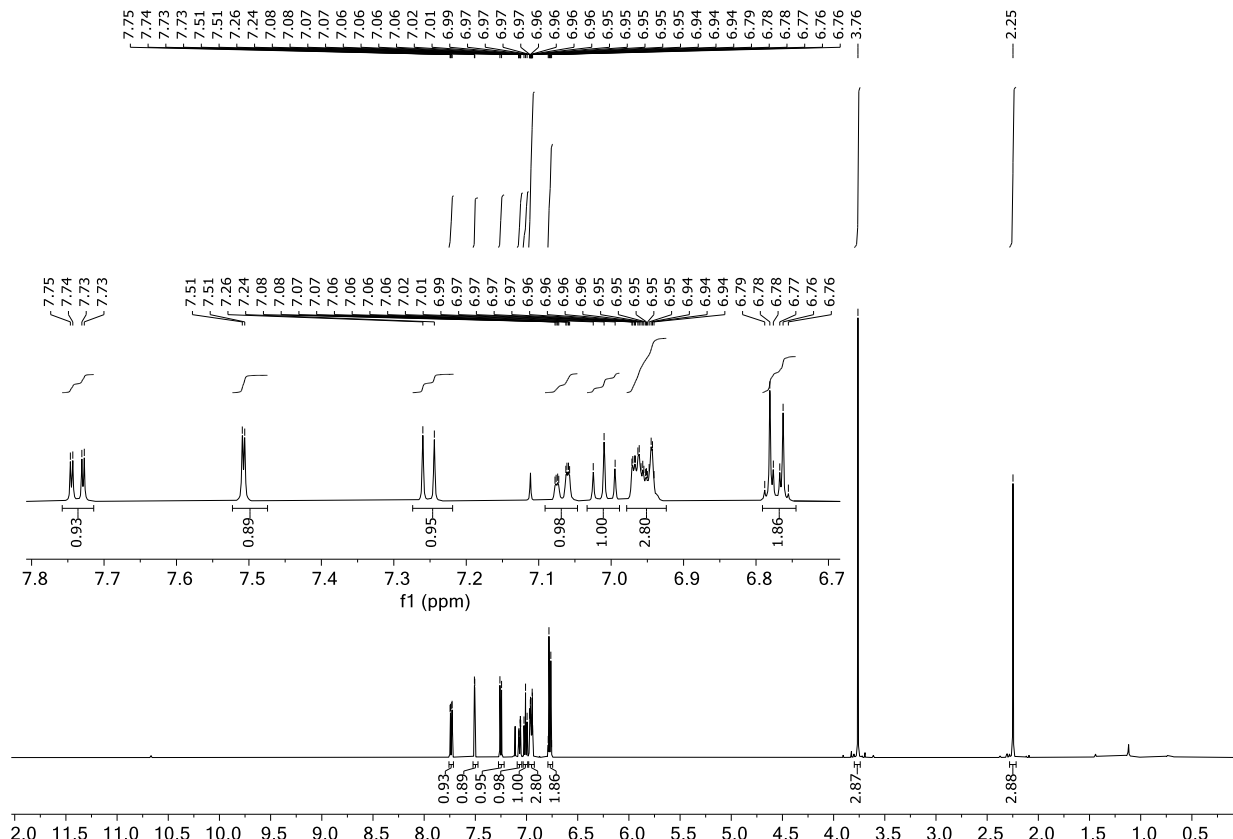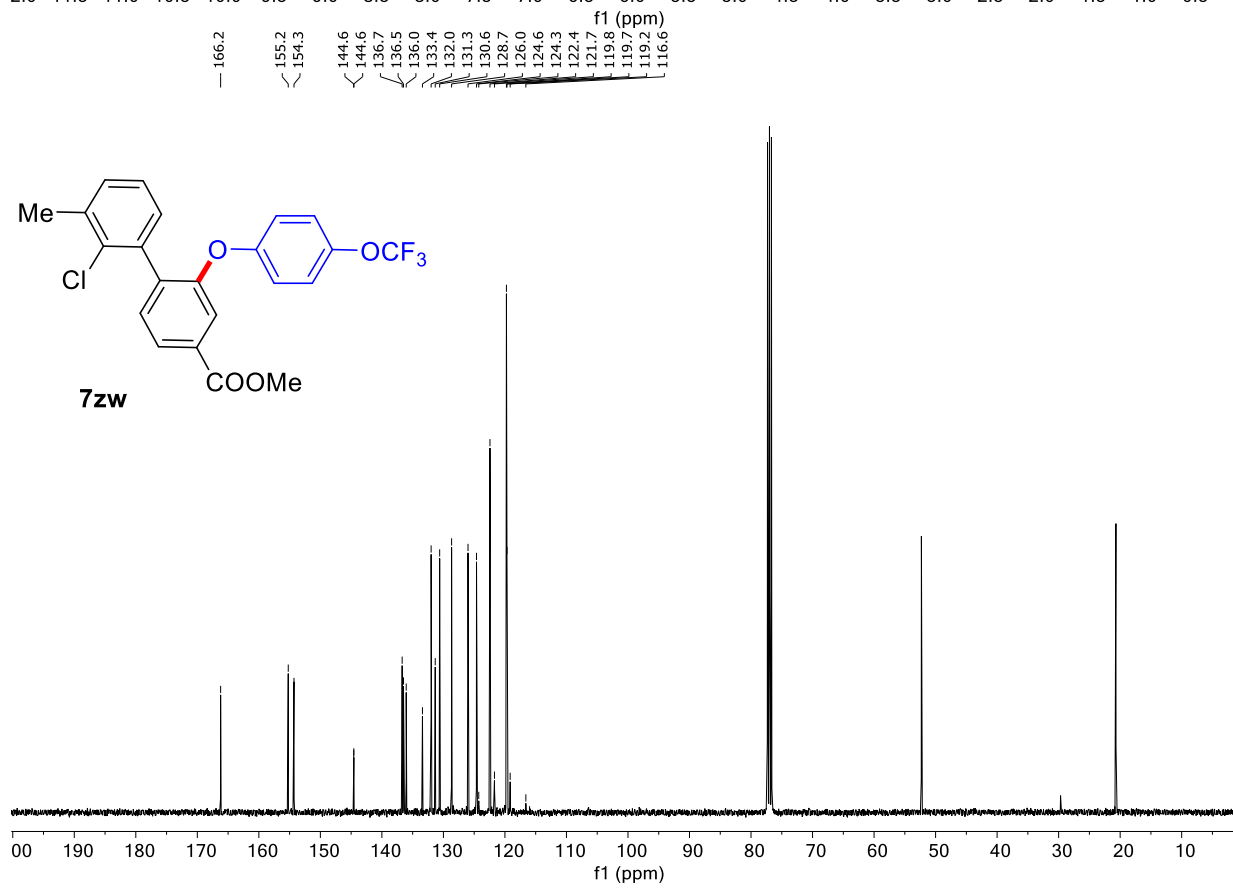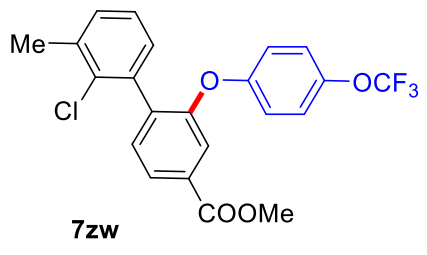

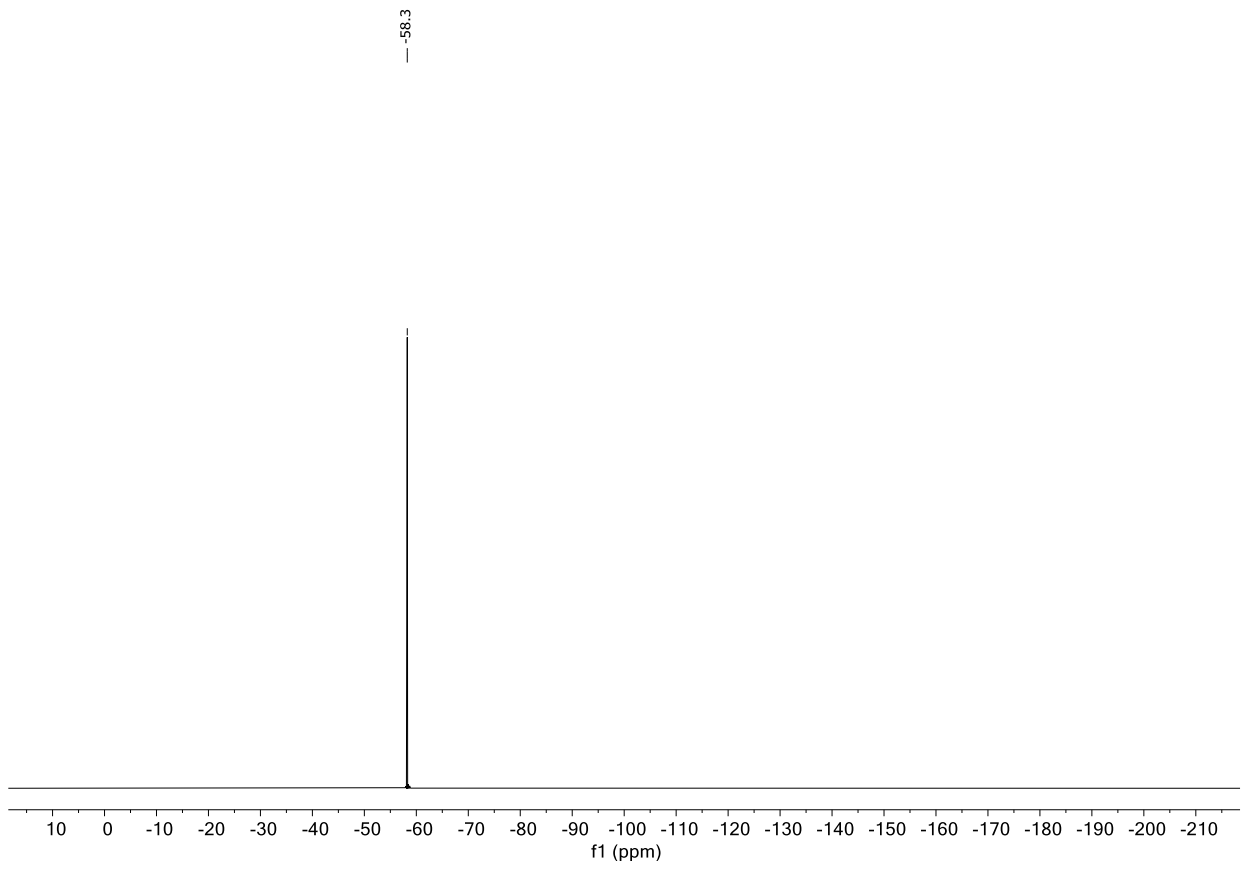

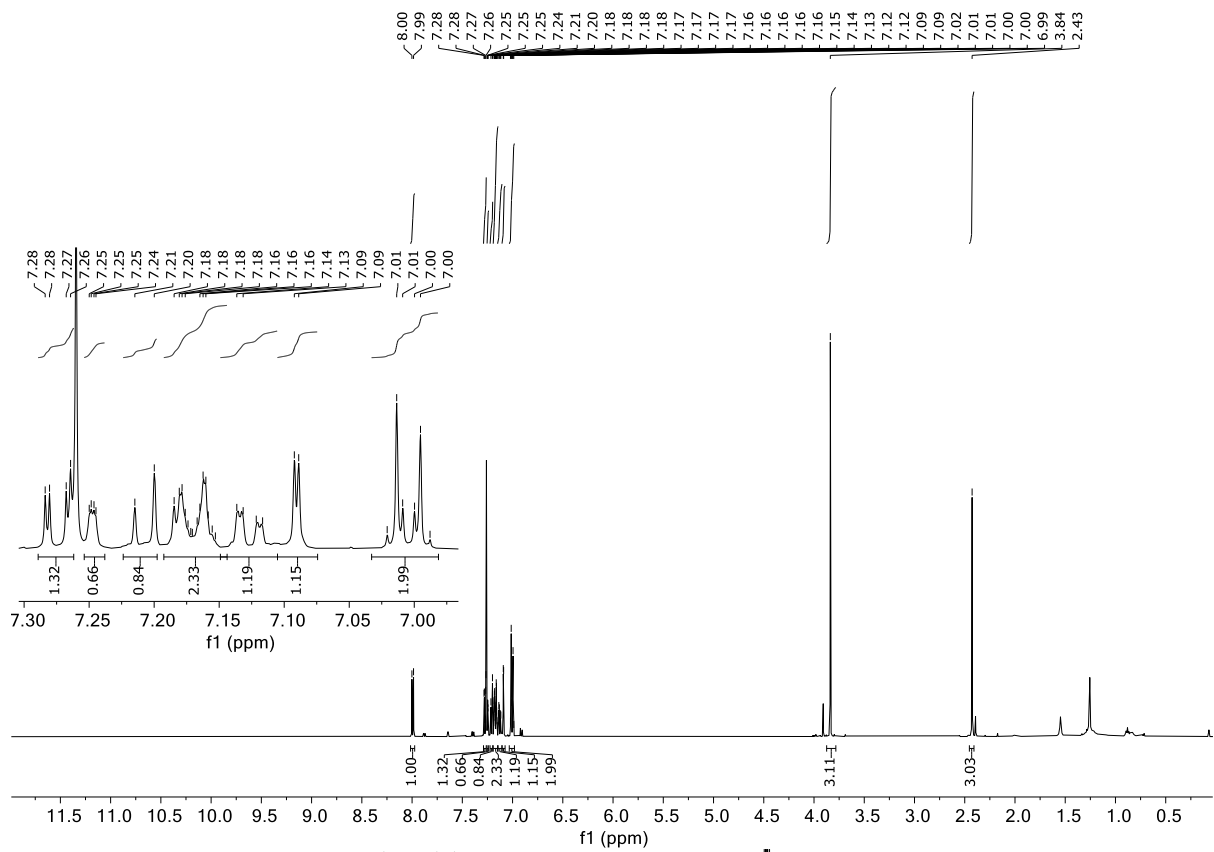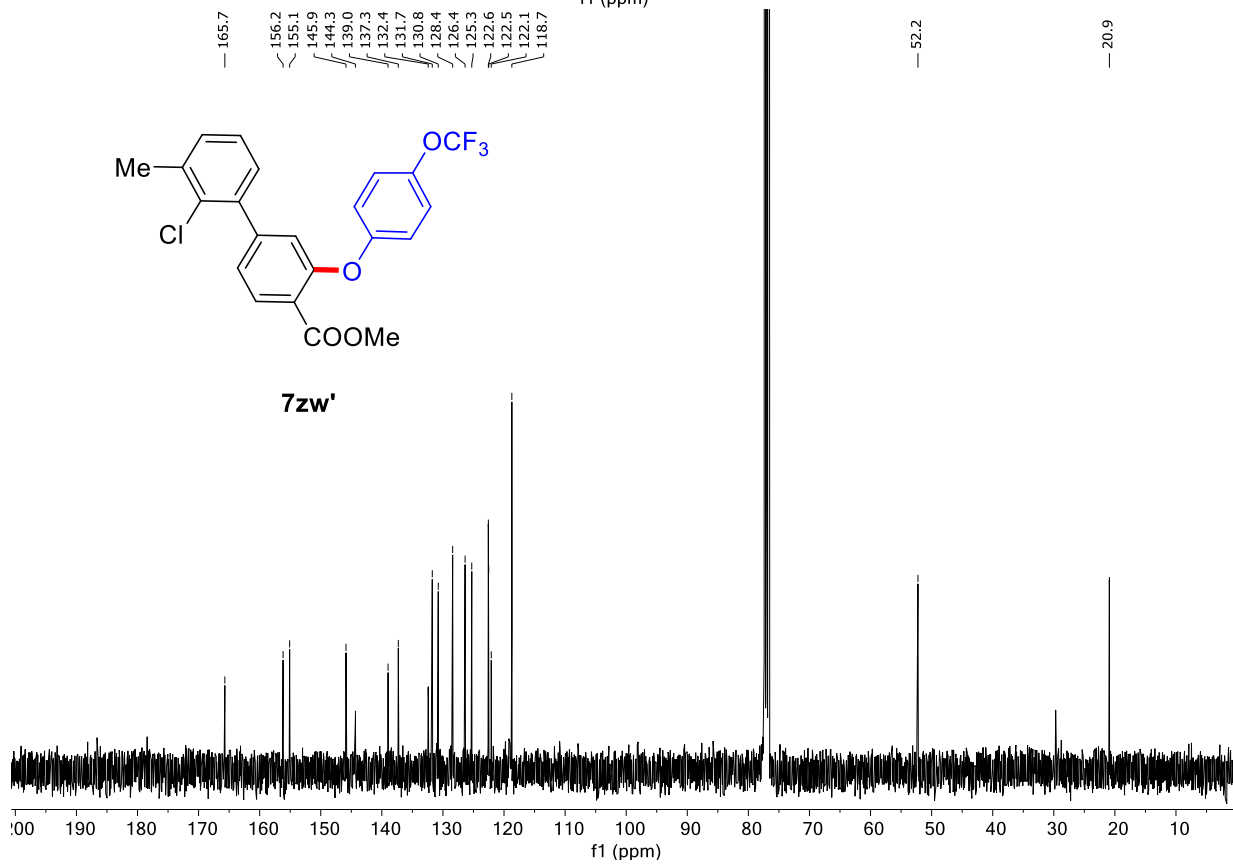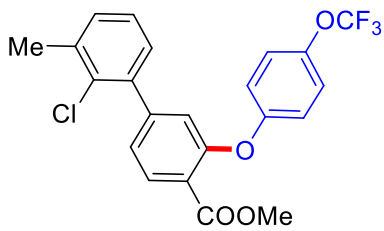

**7zw'**

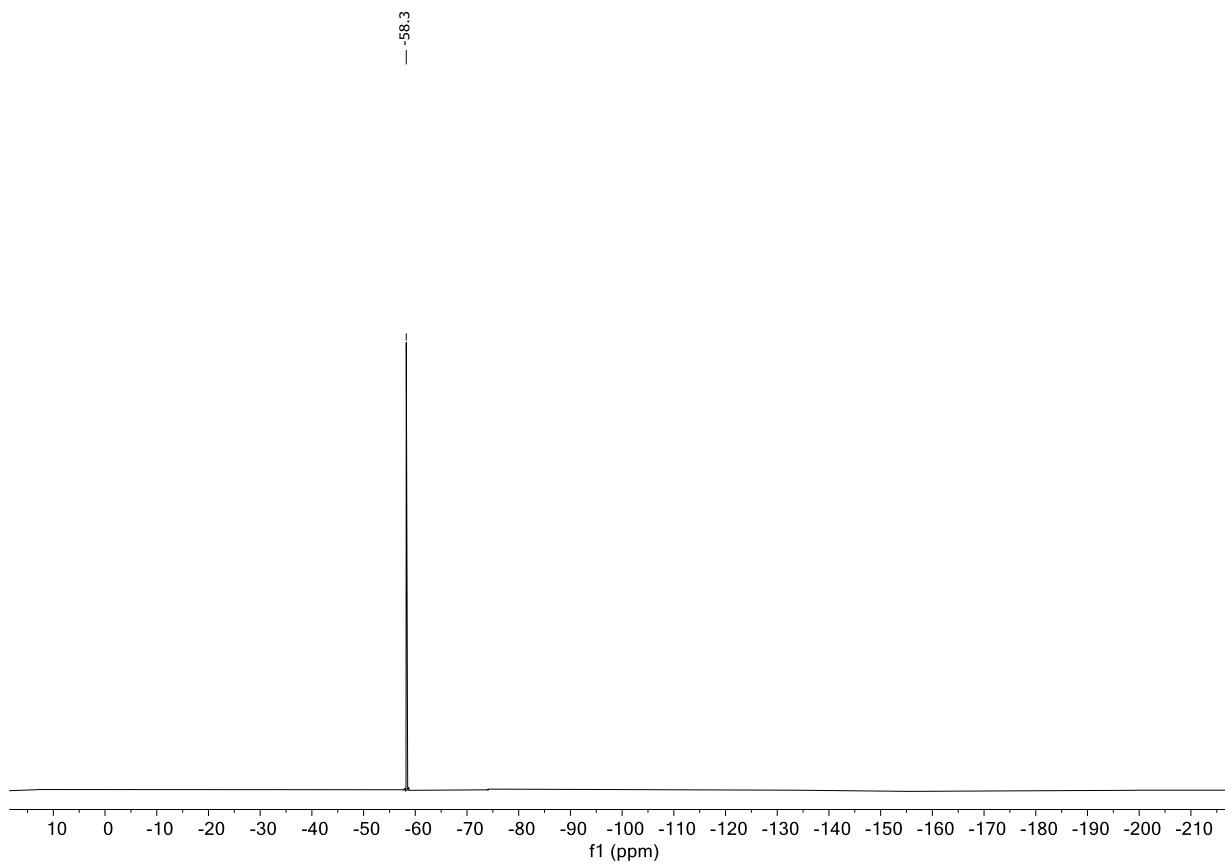



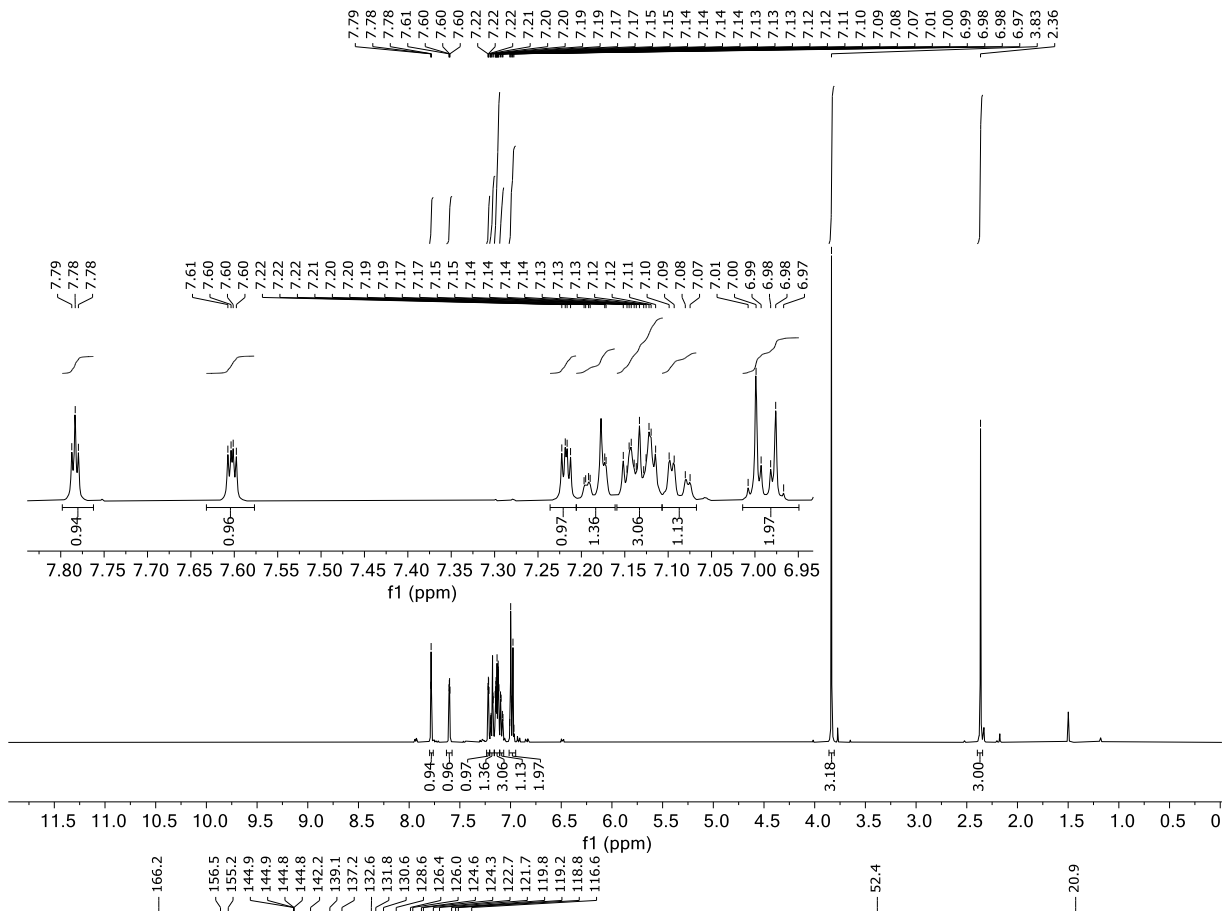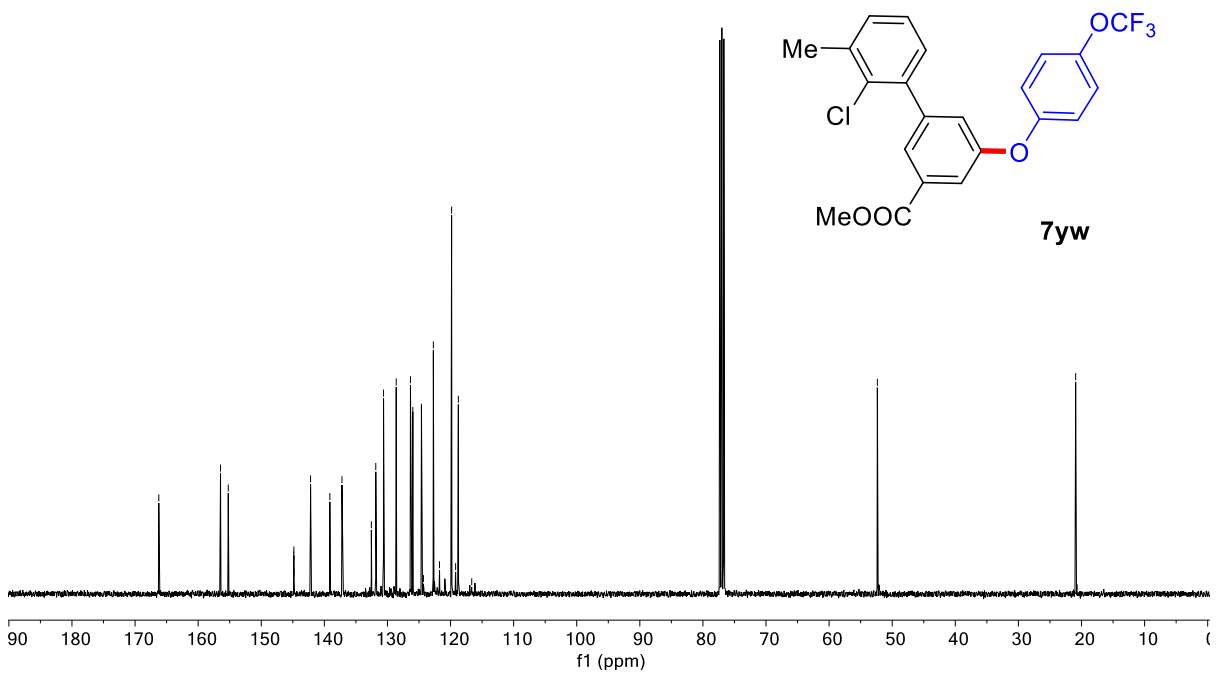

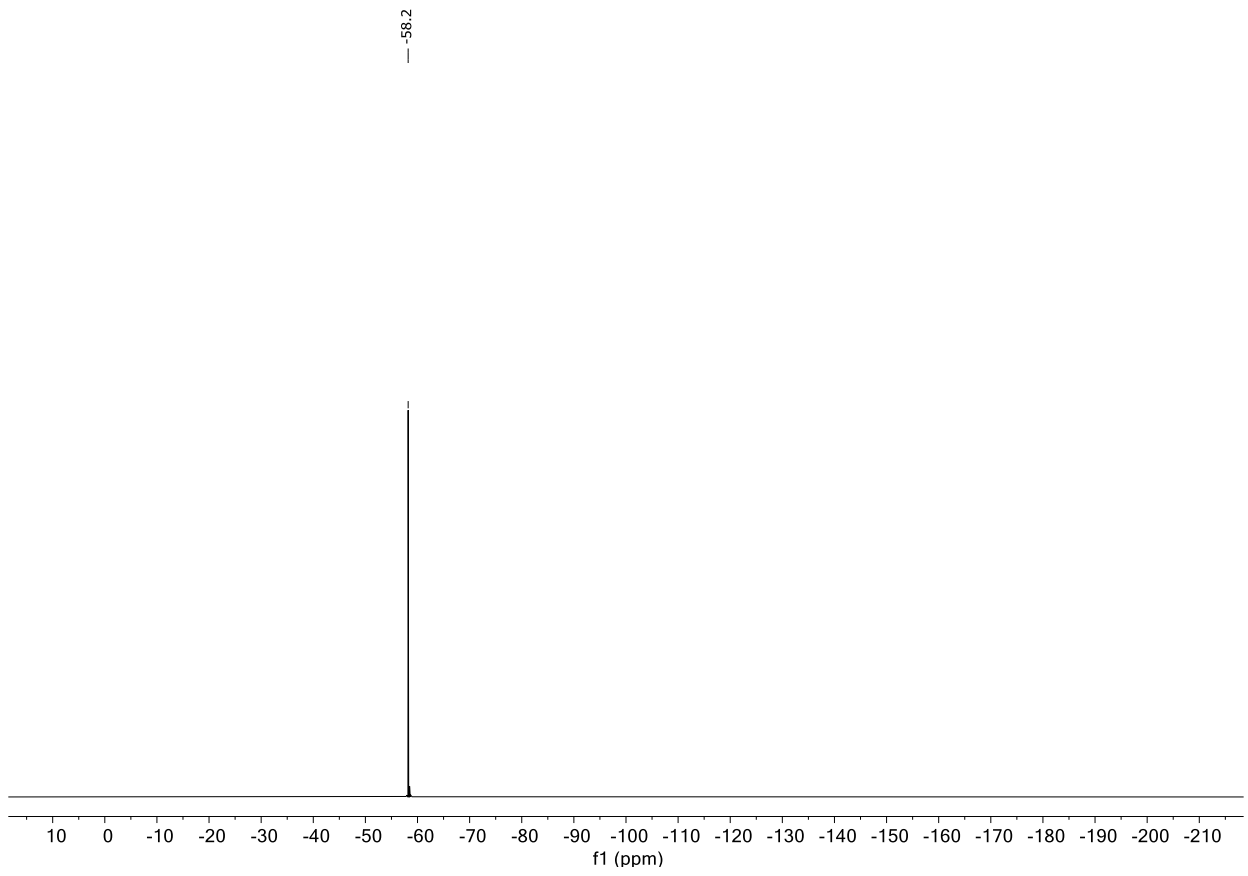

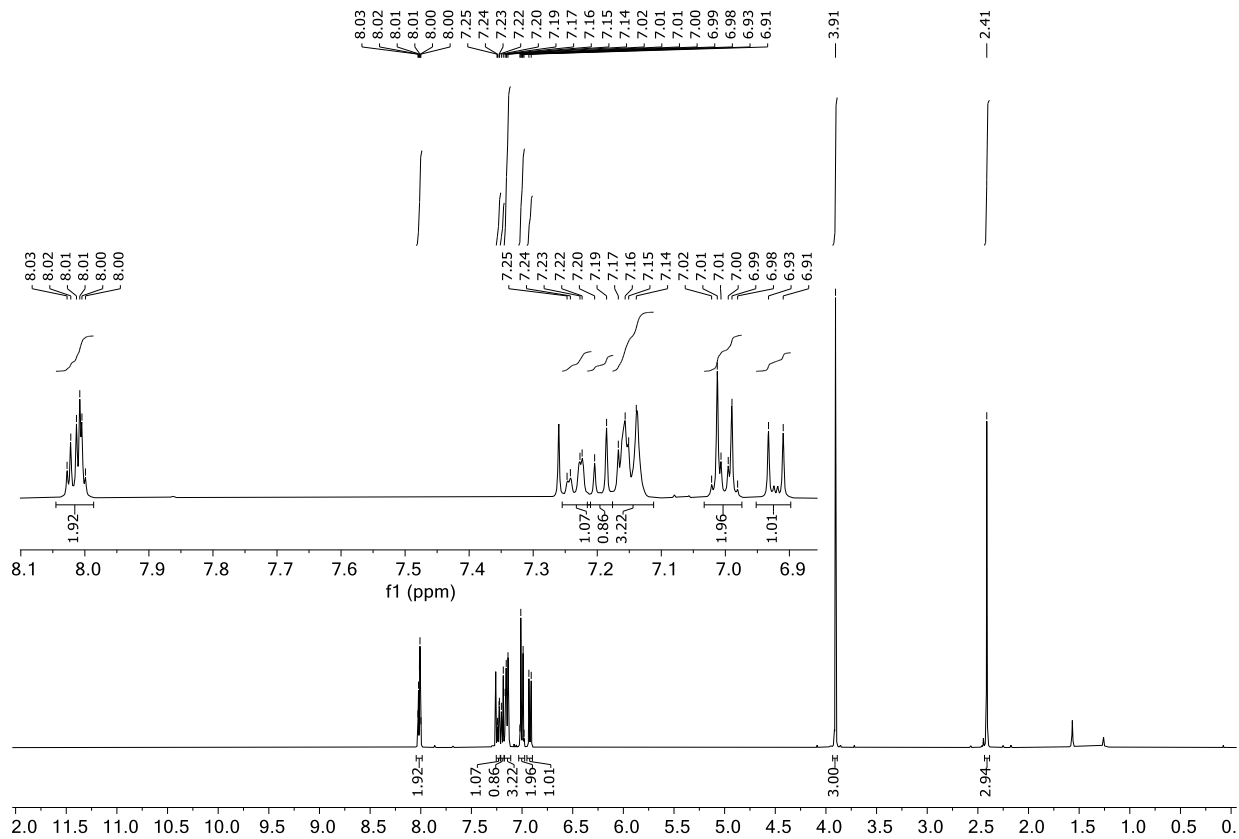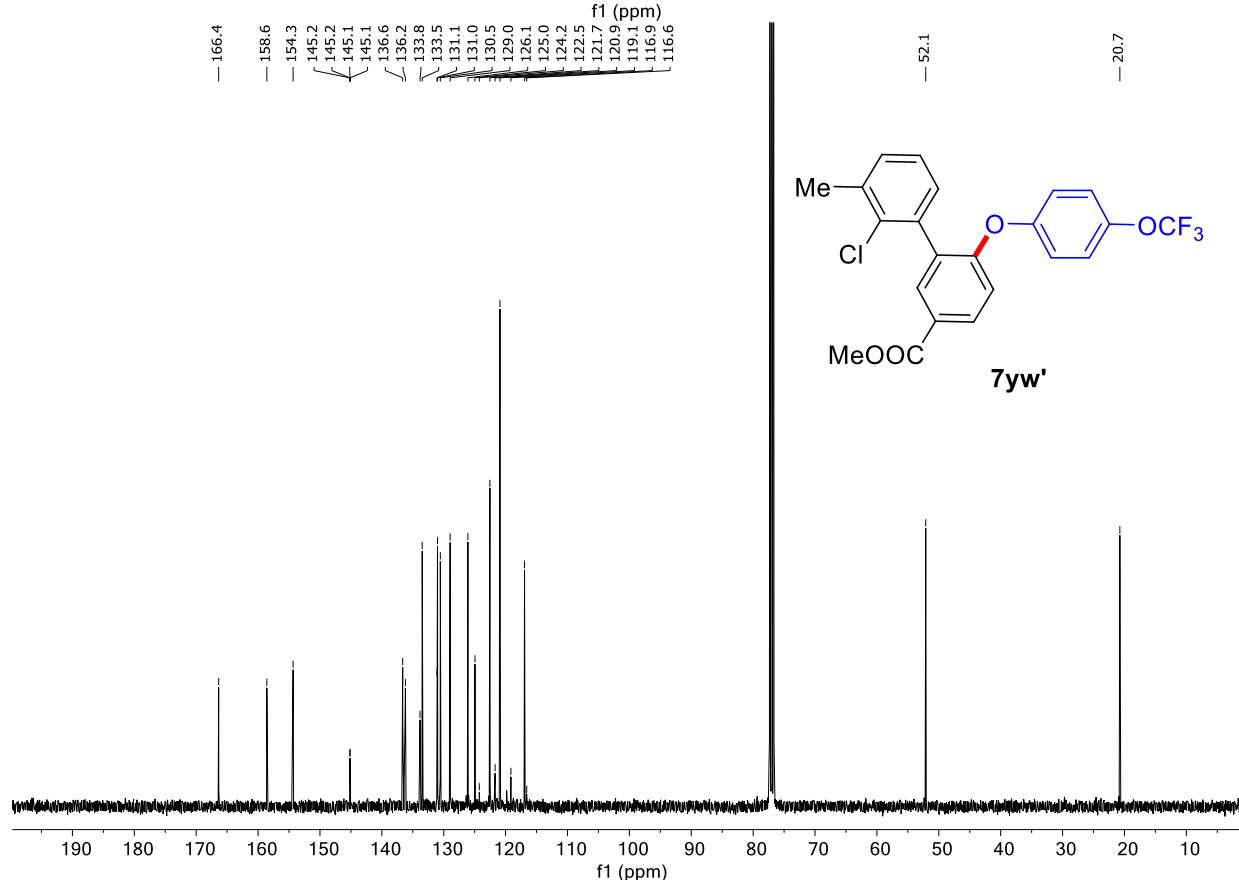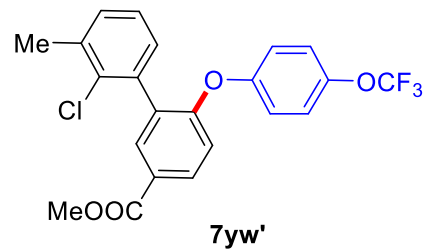

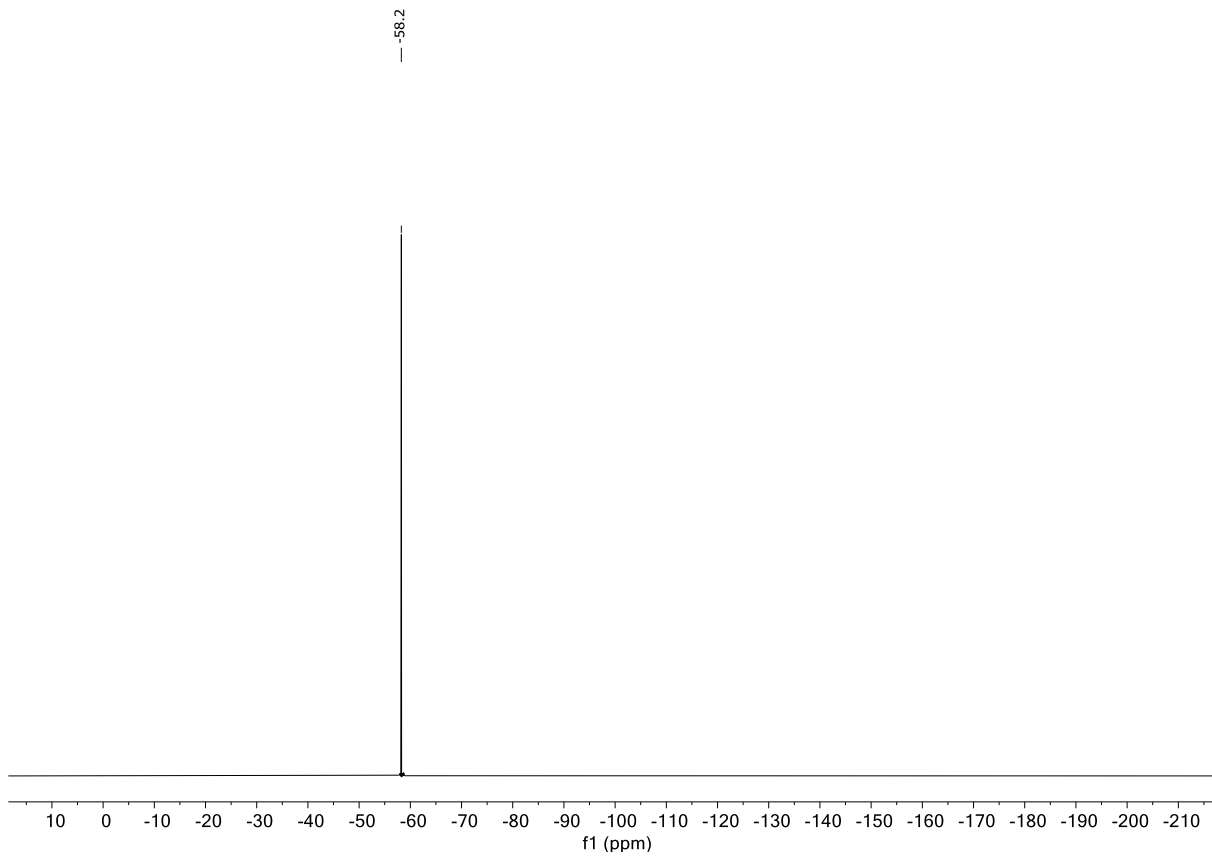

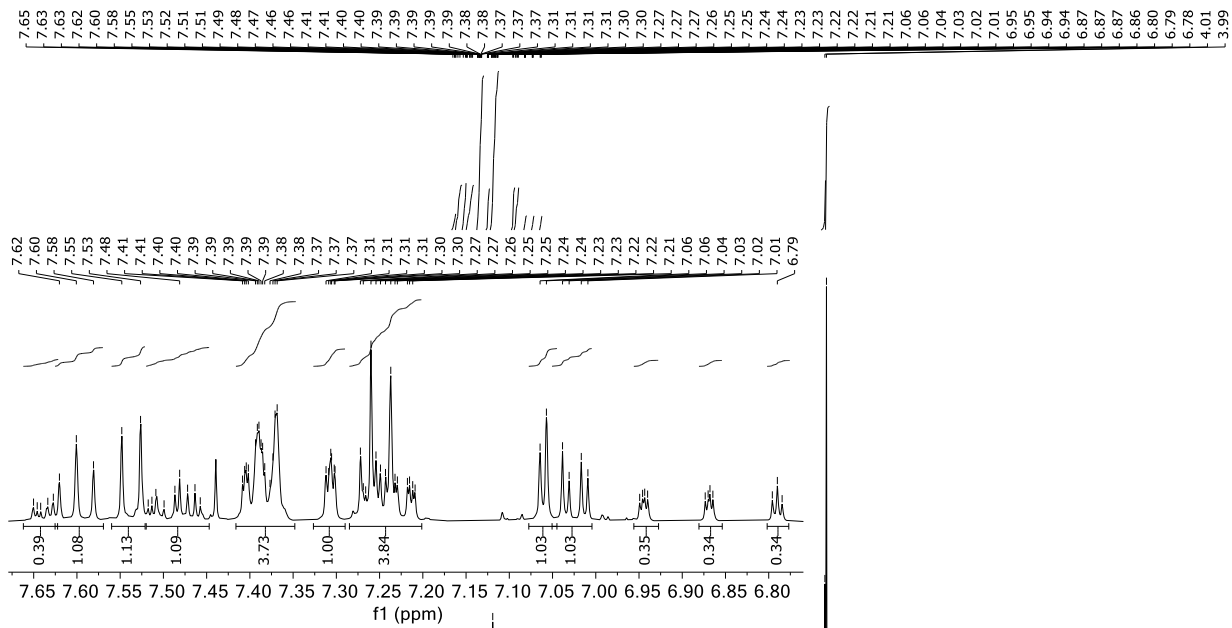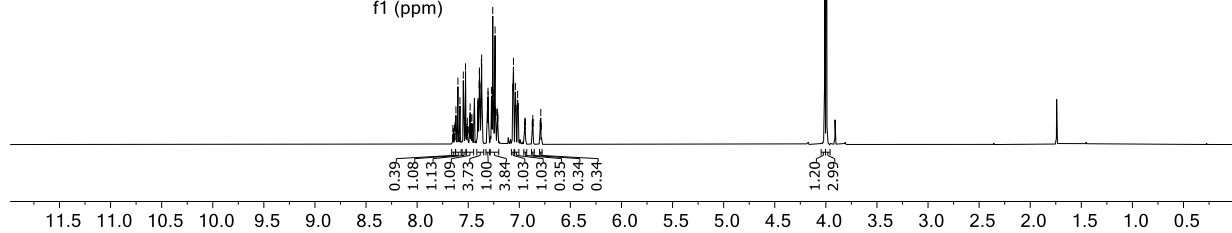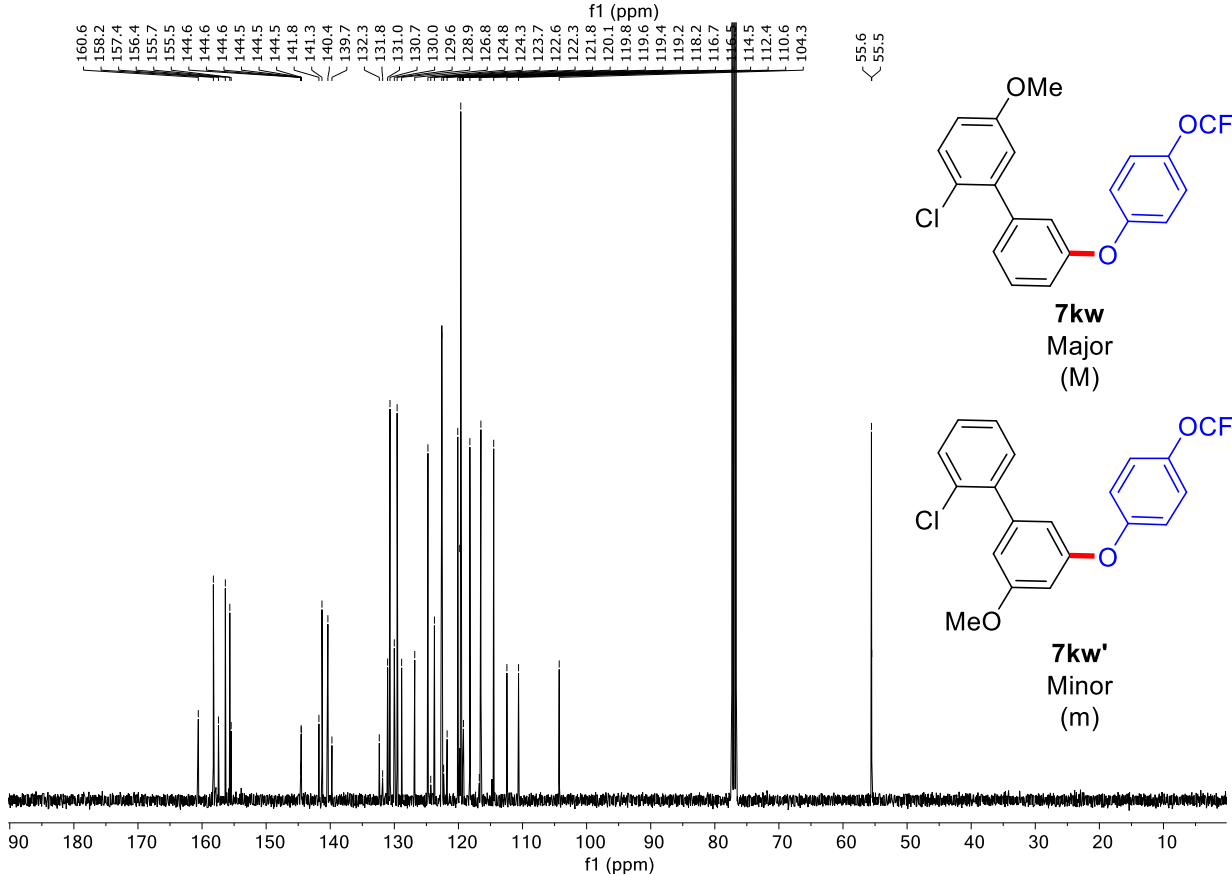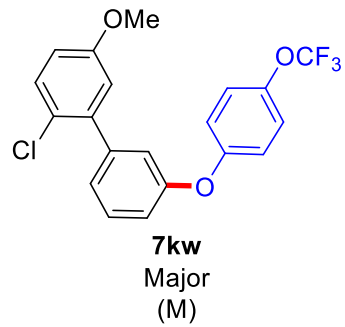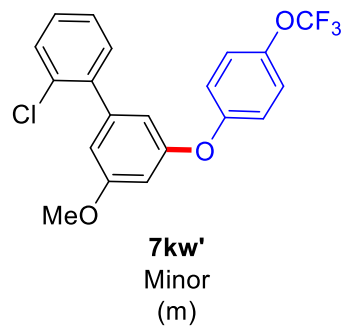

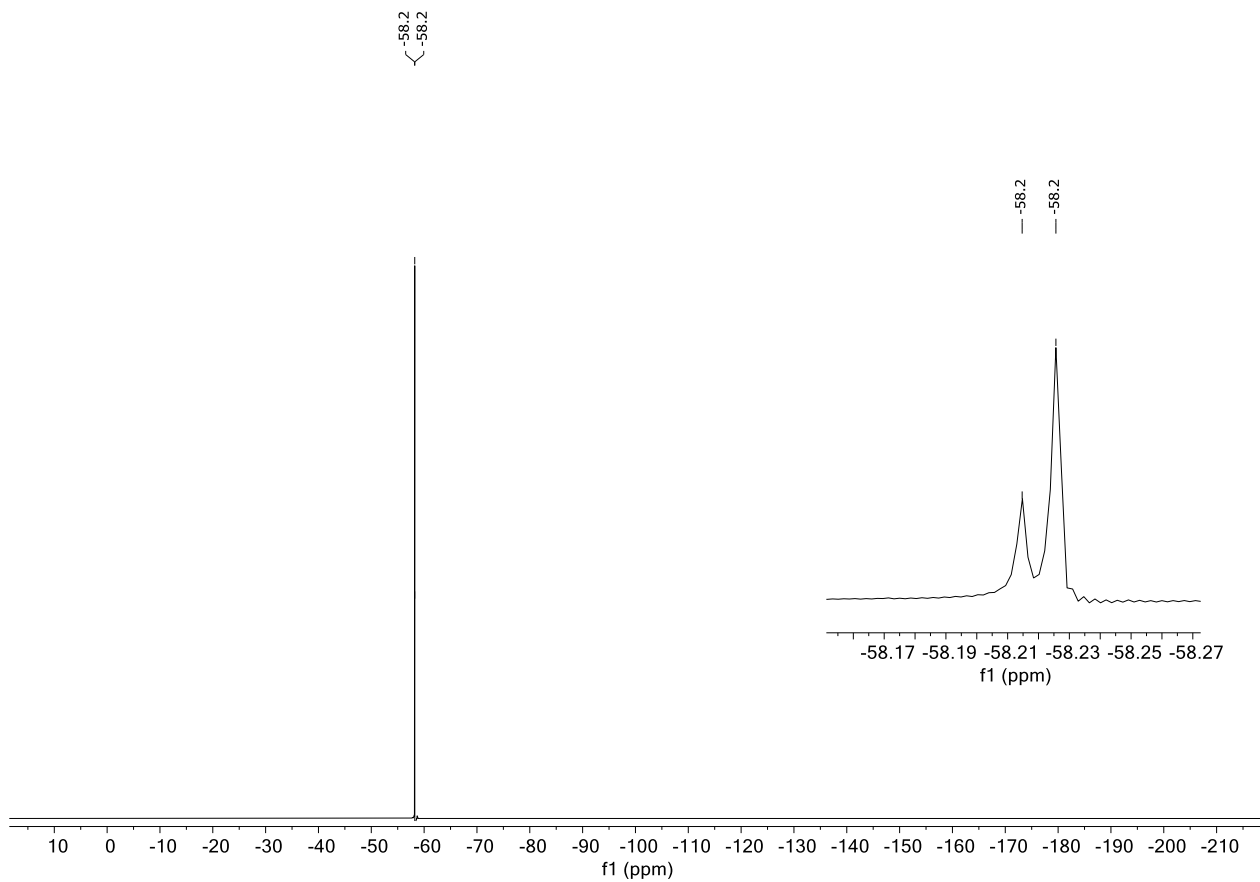

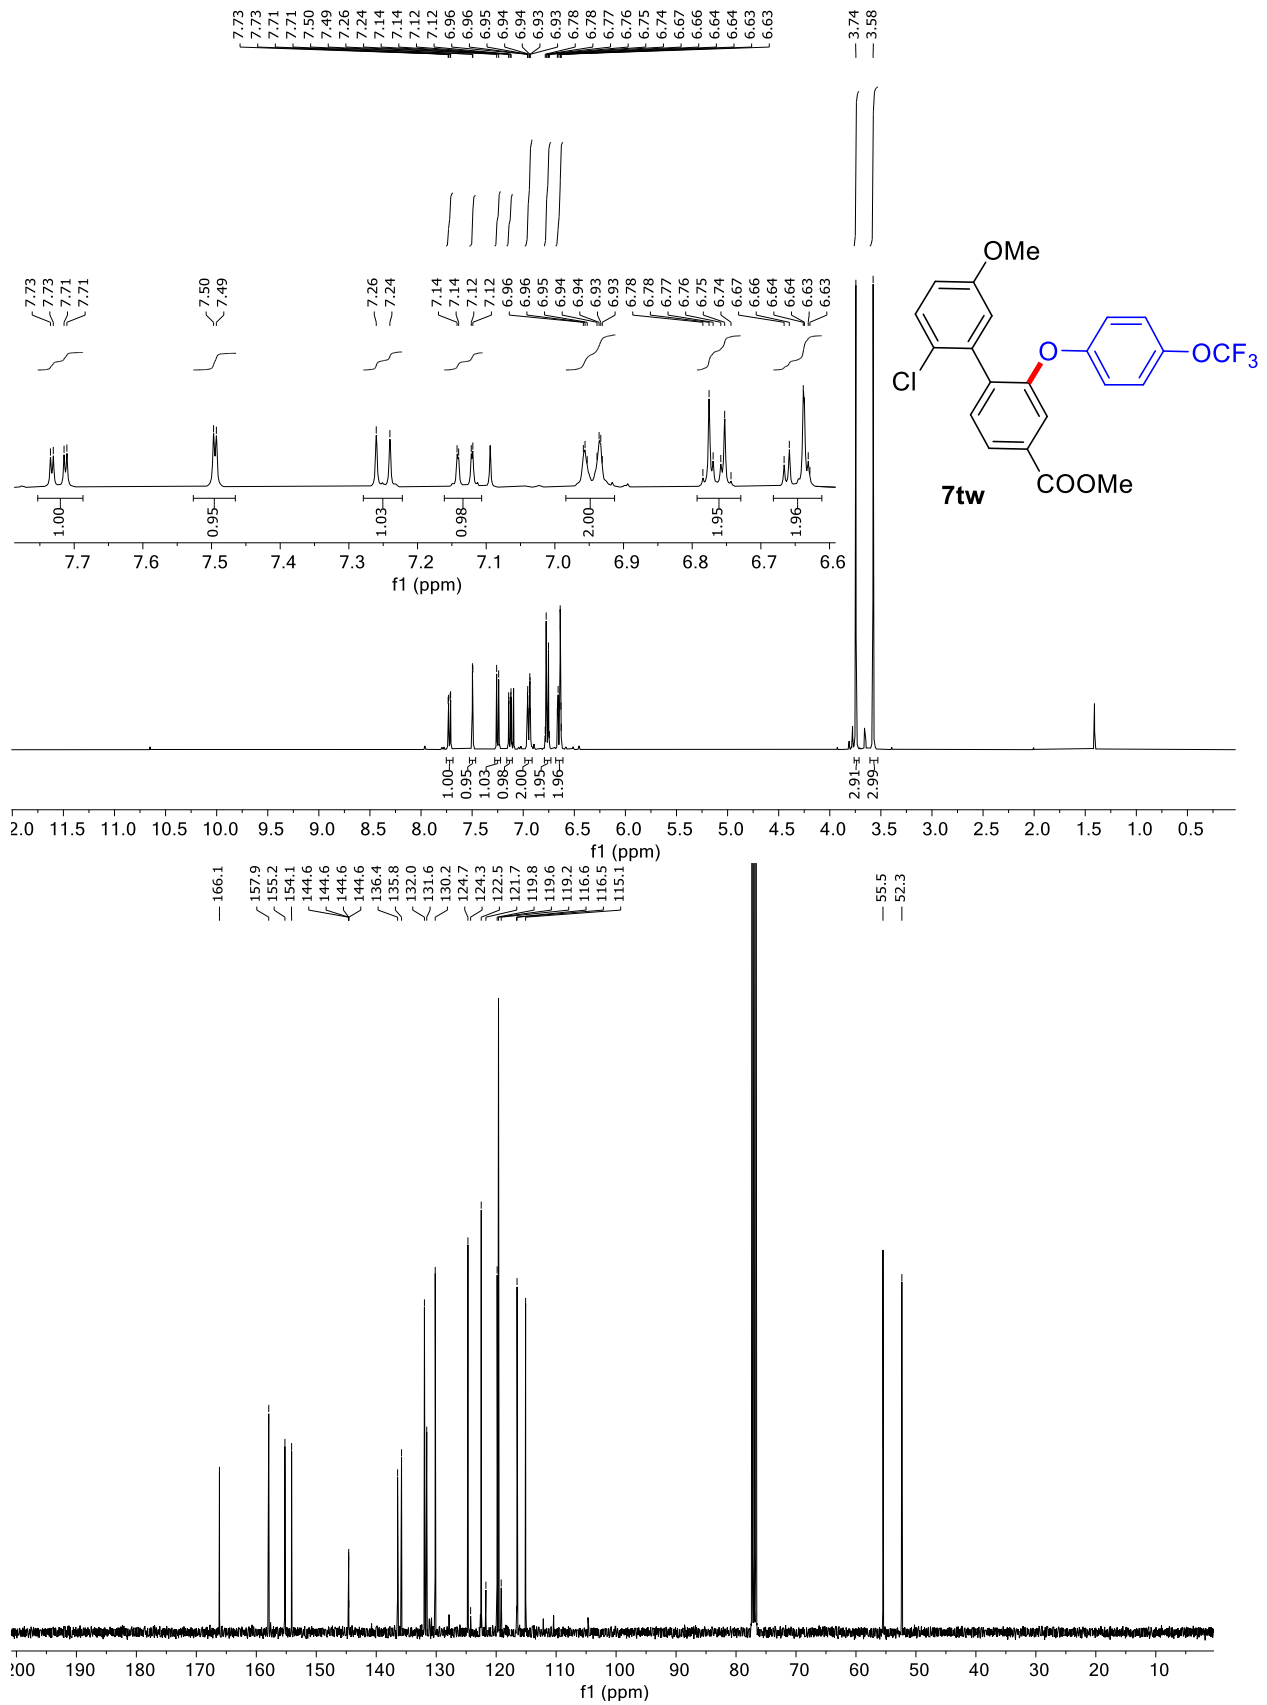

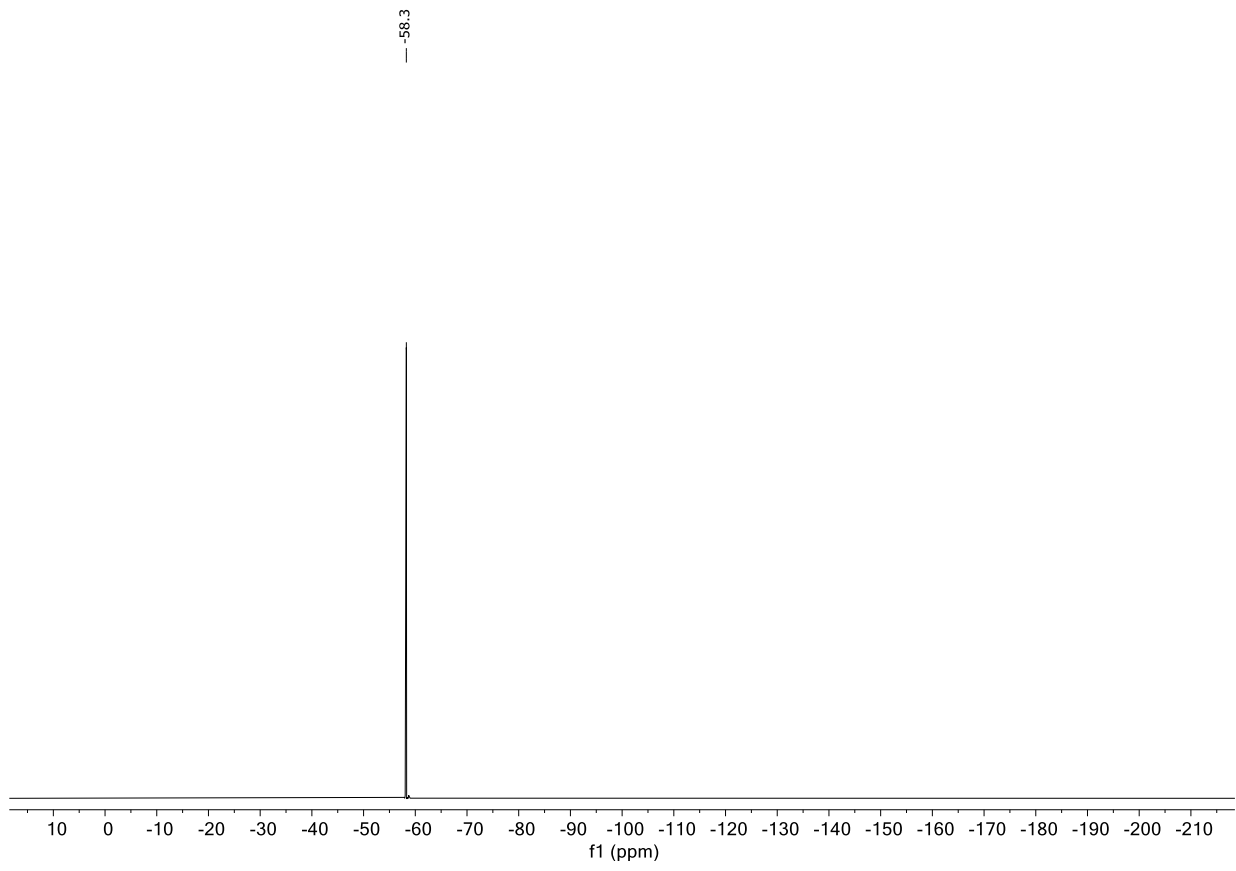



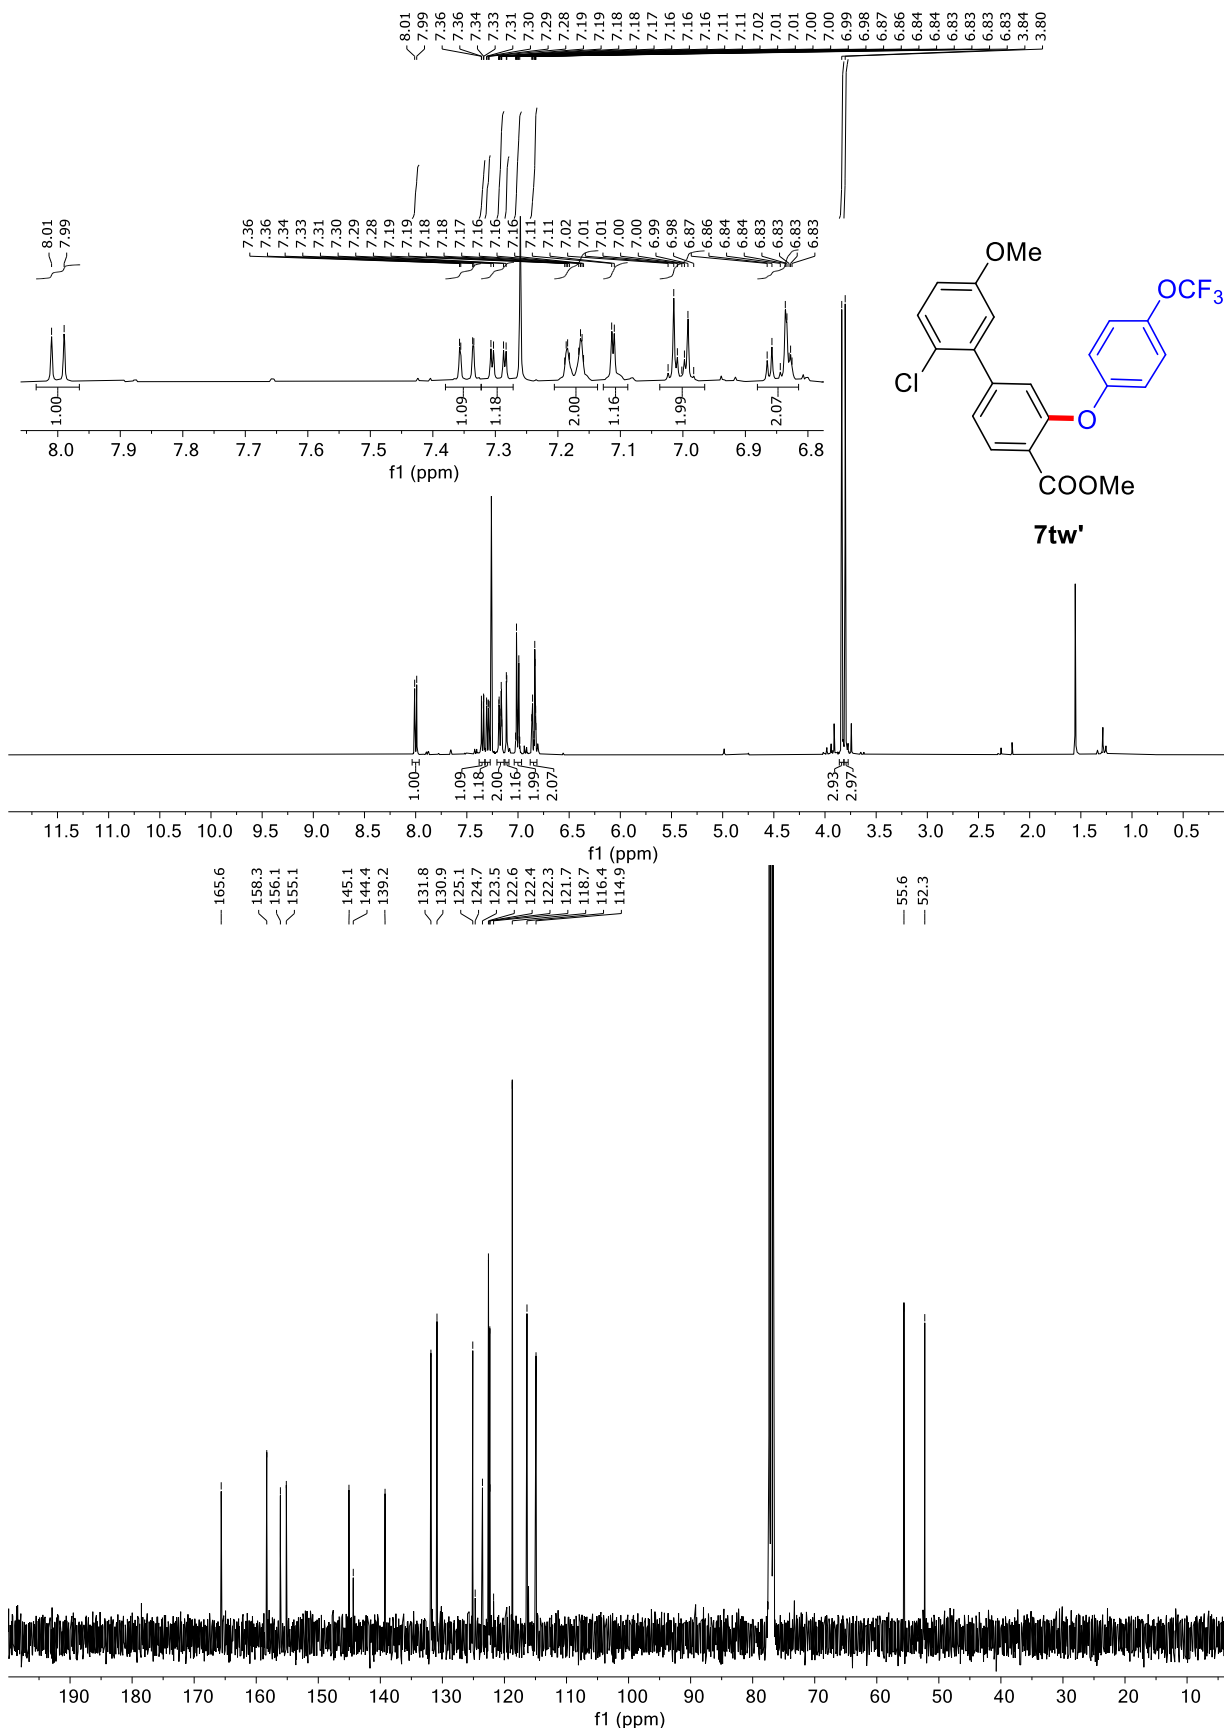

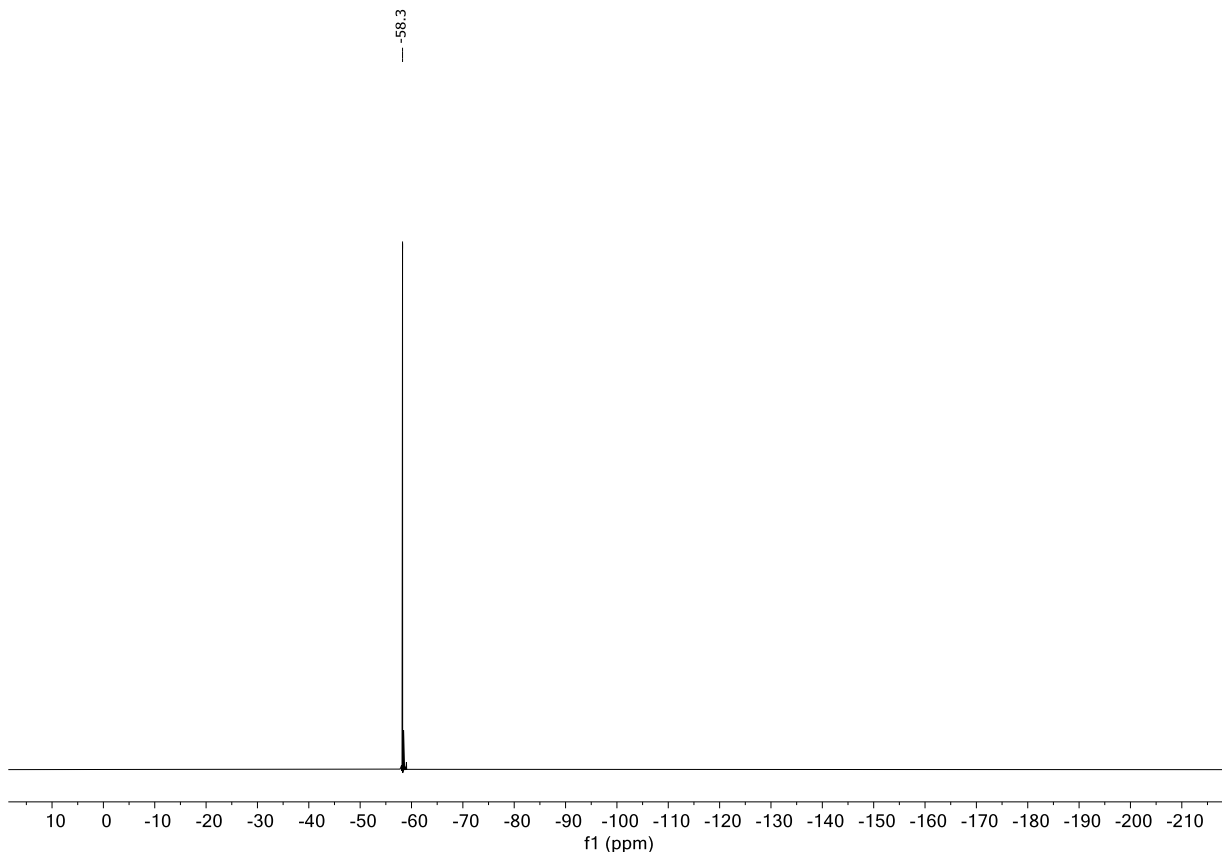

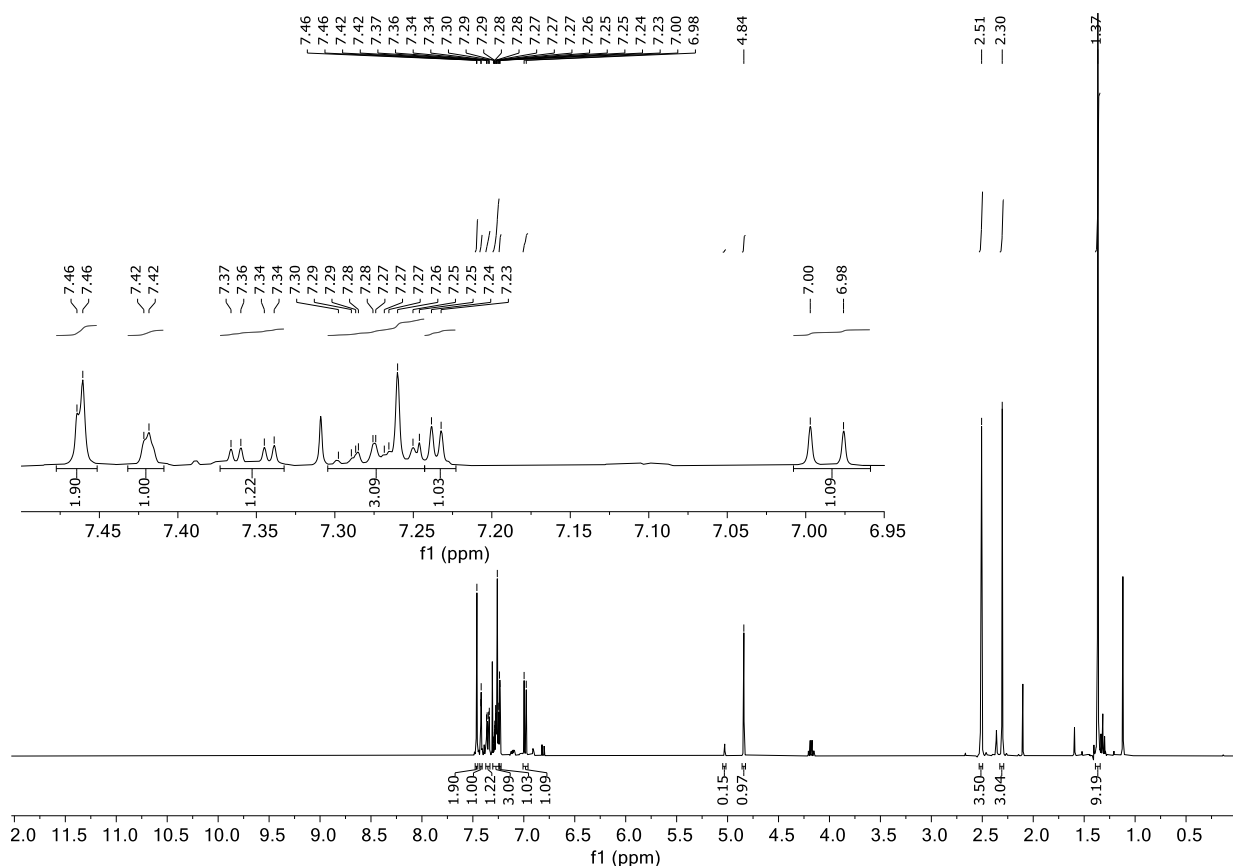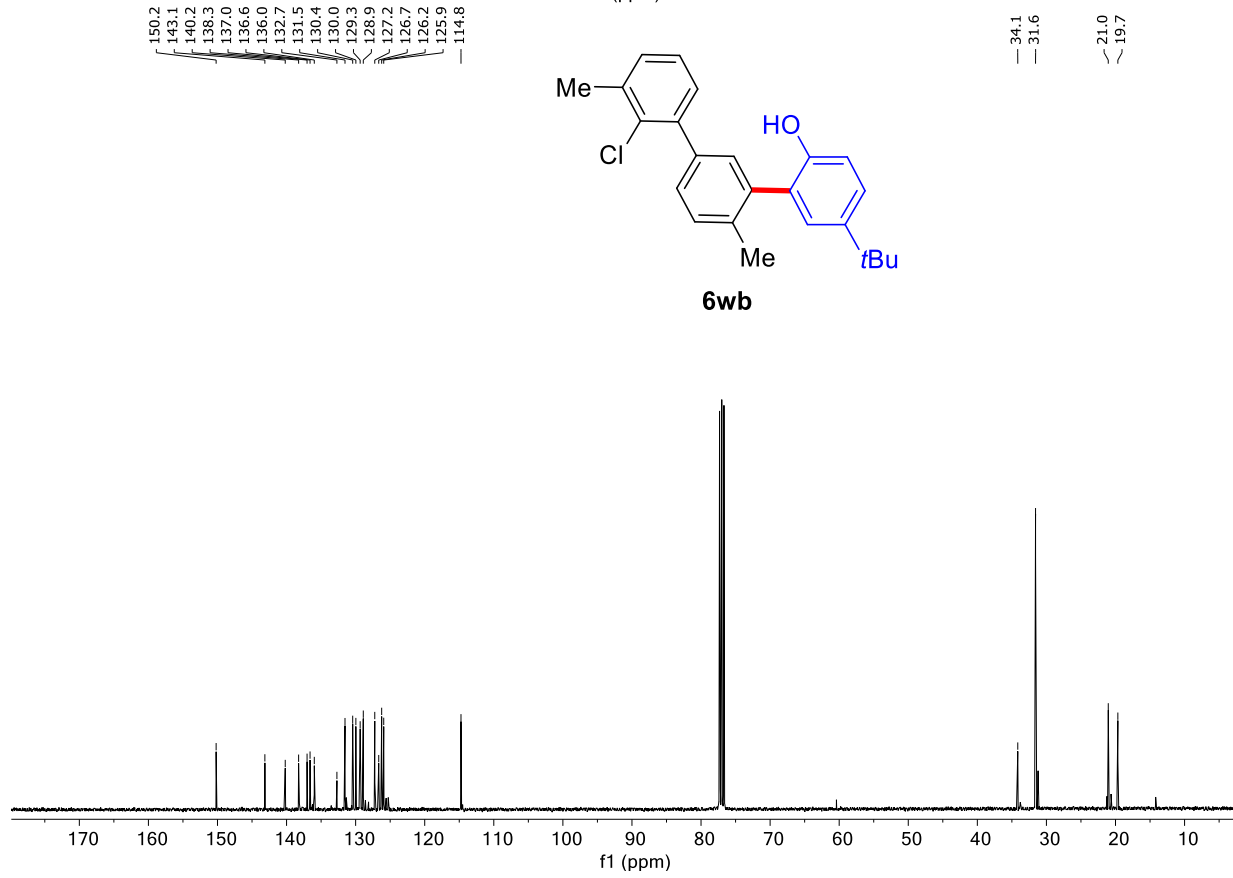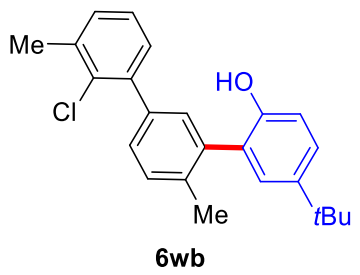

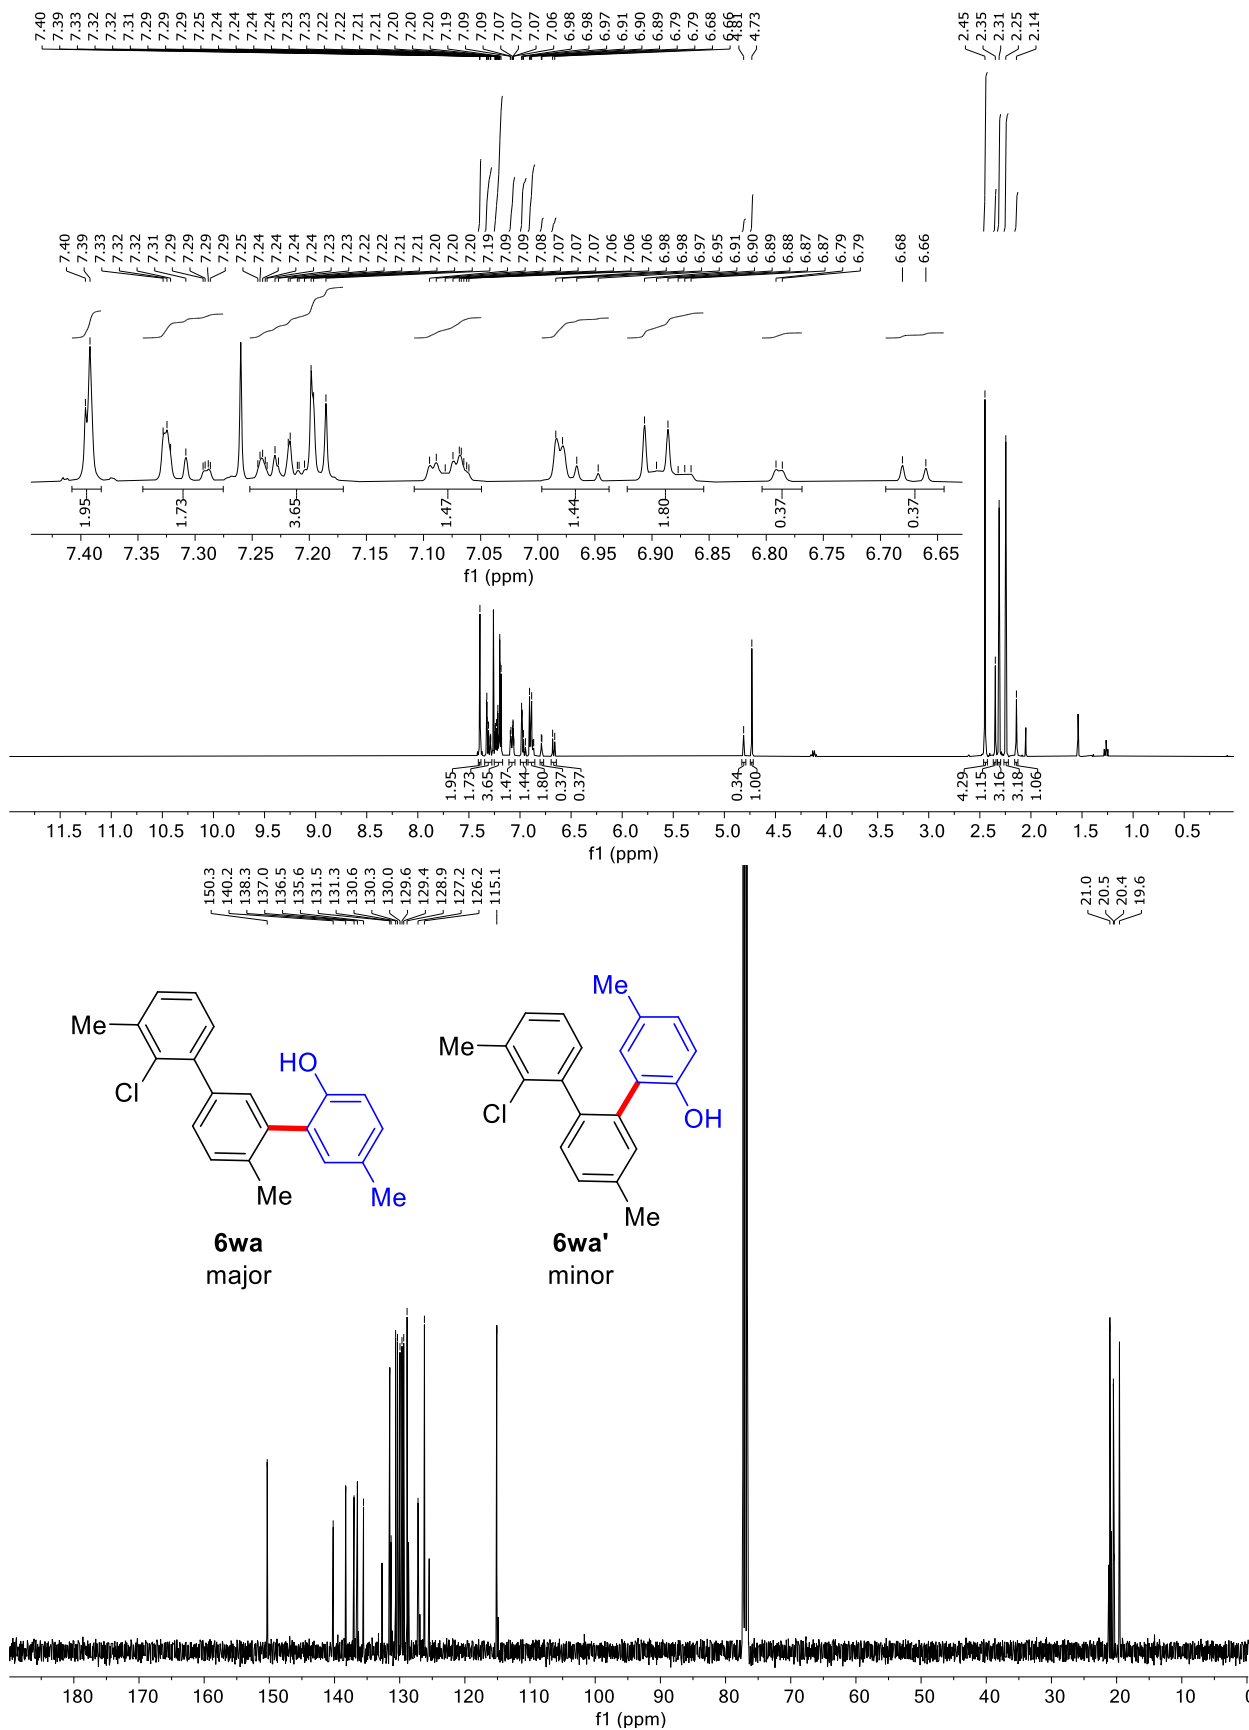

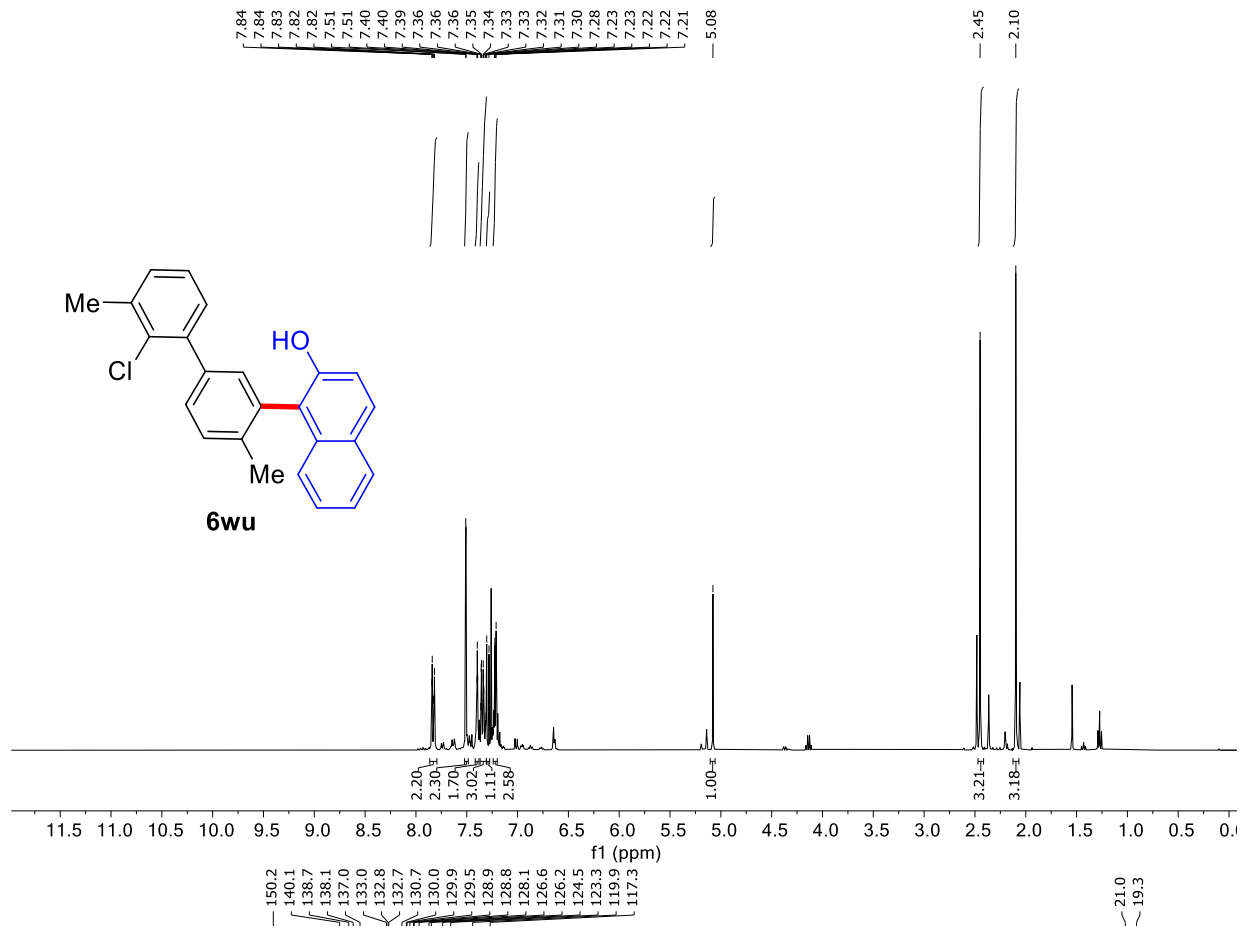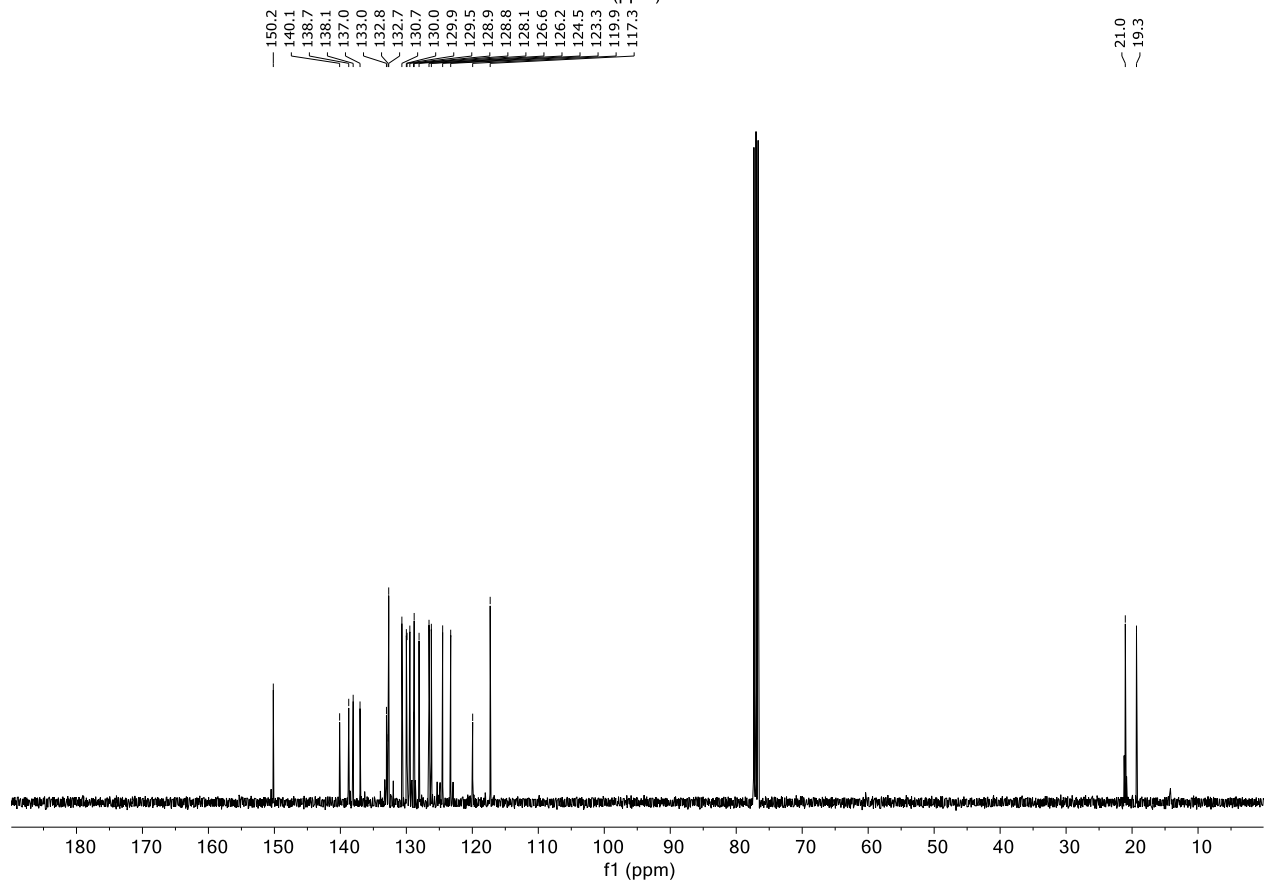

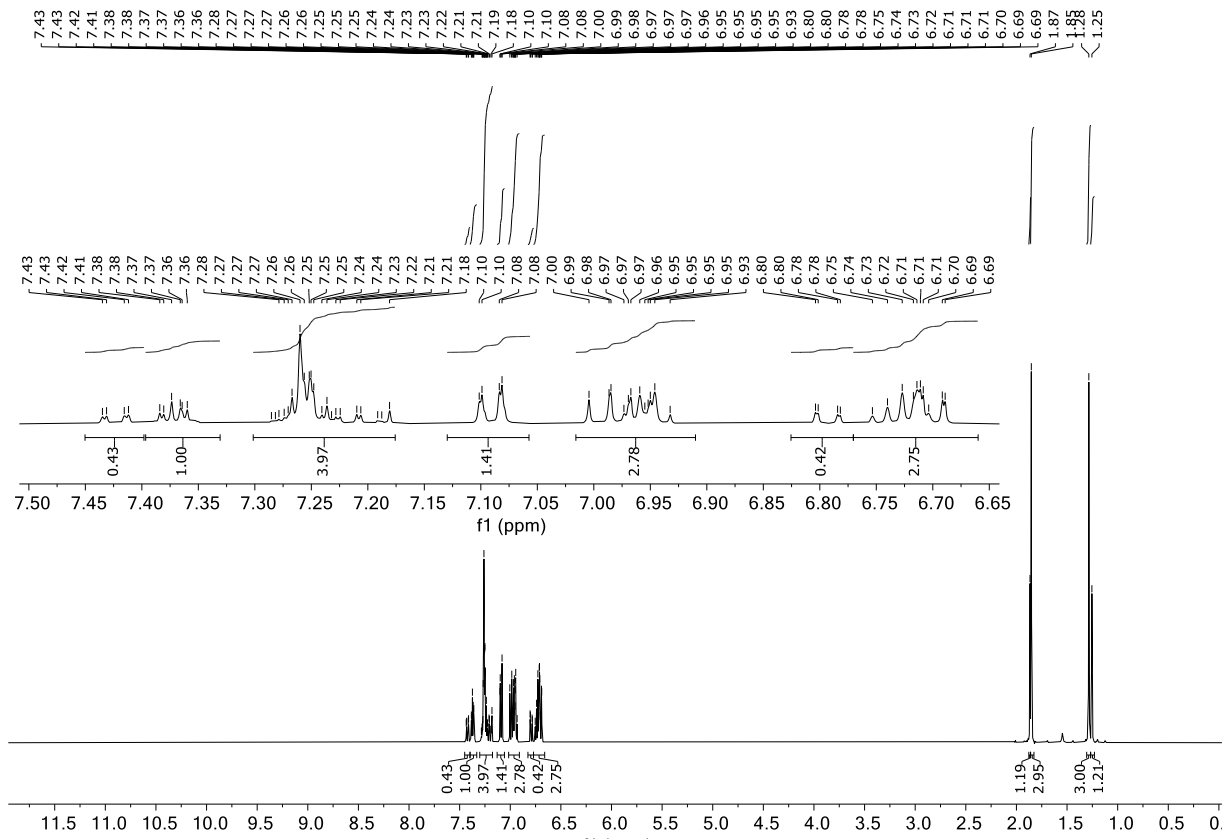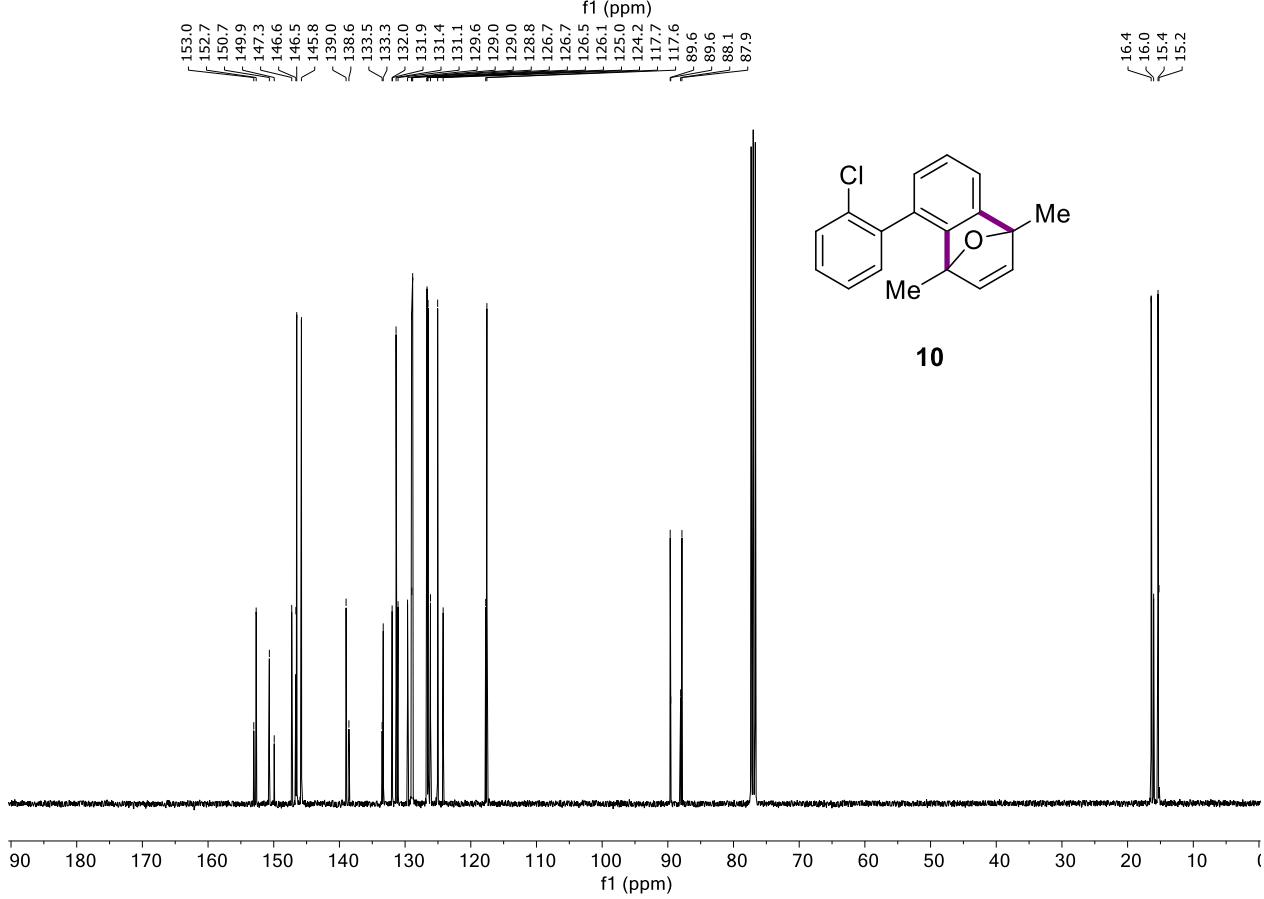

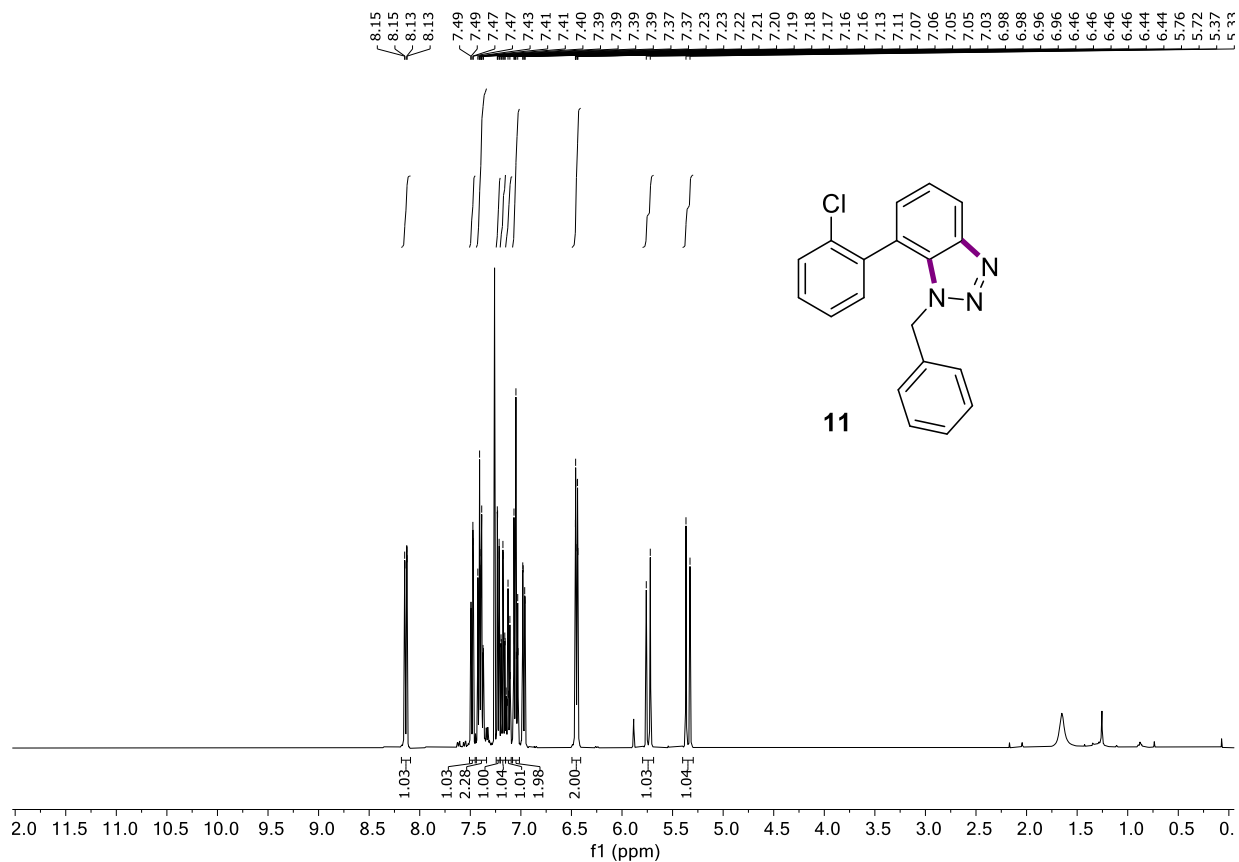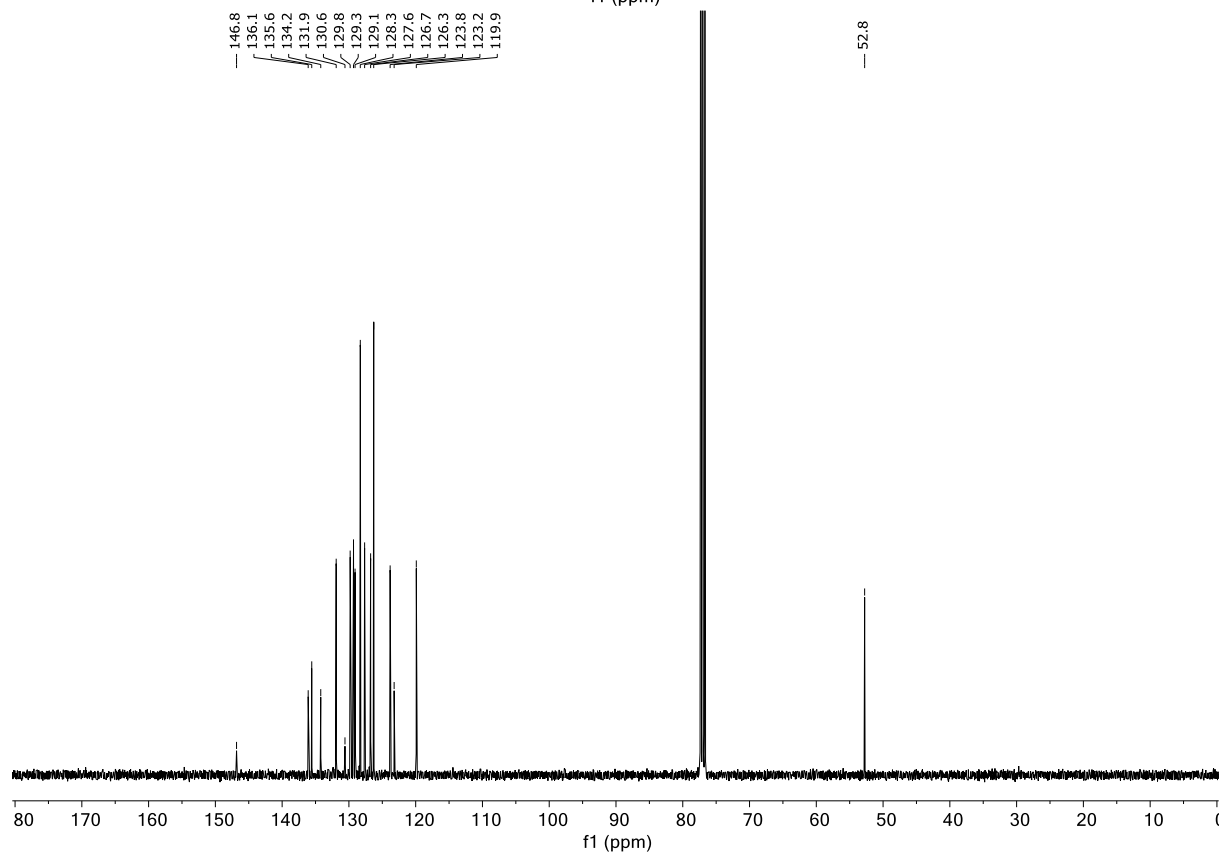

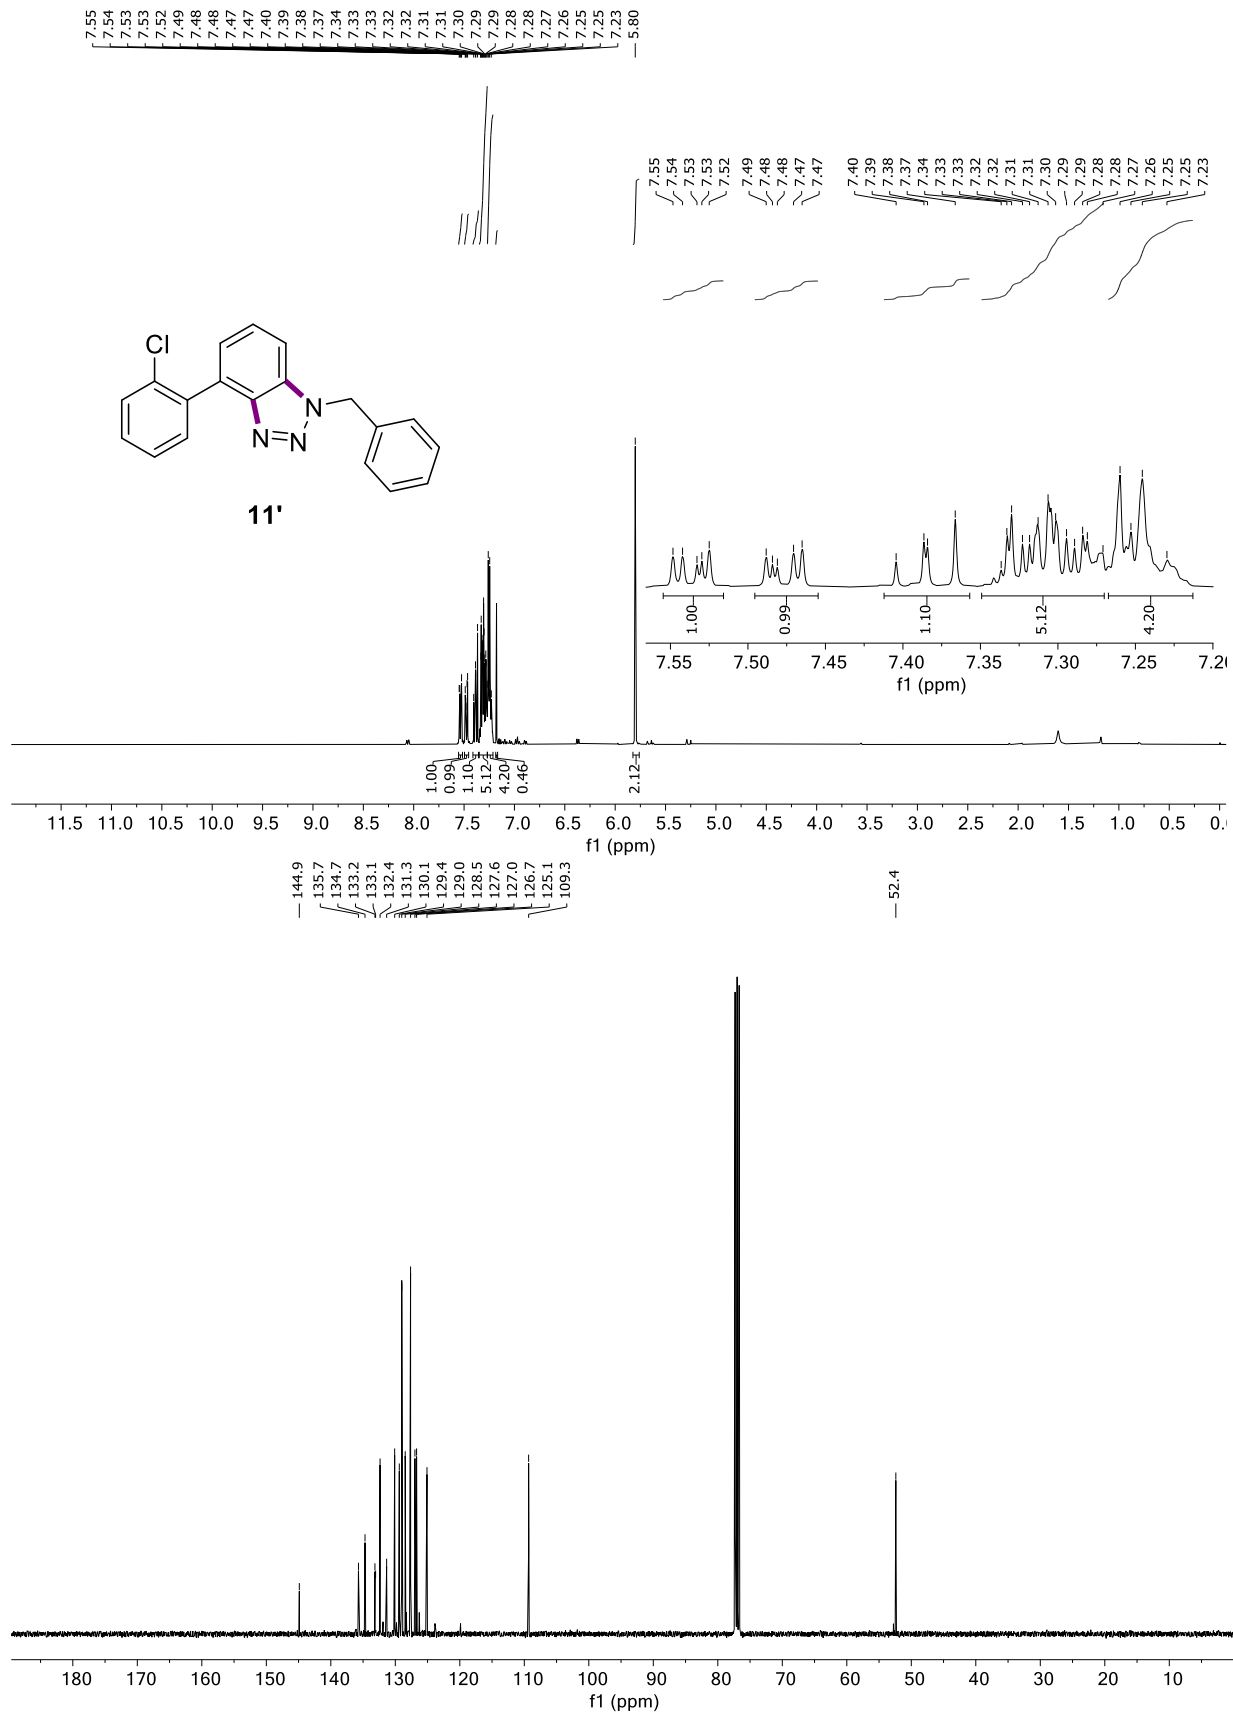



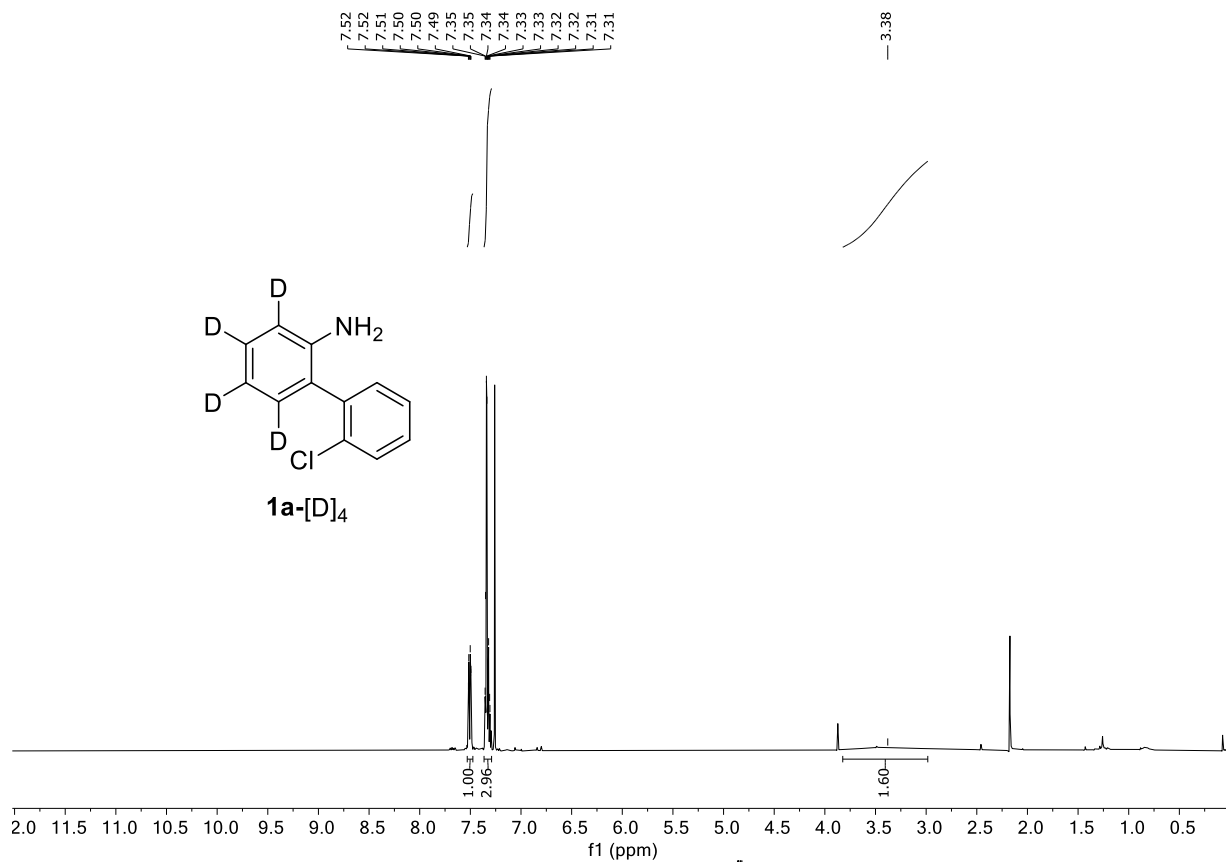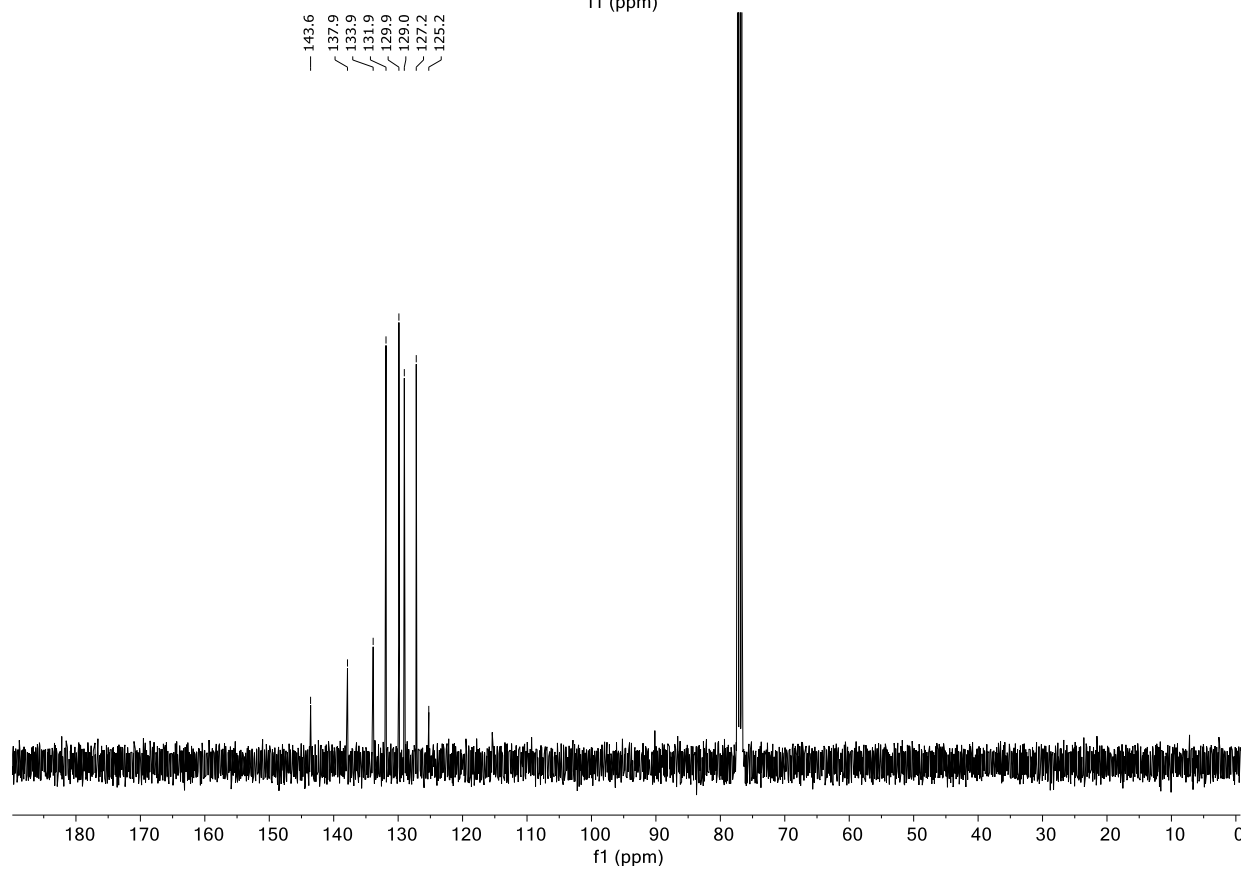

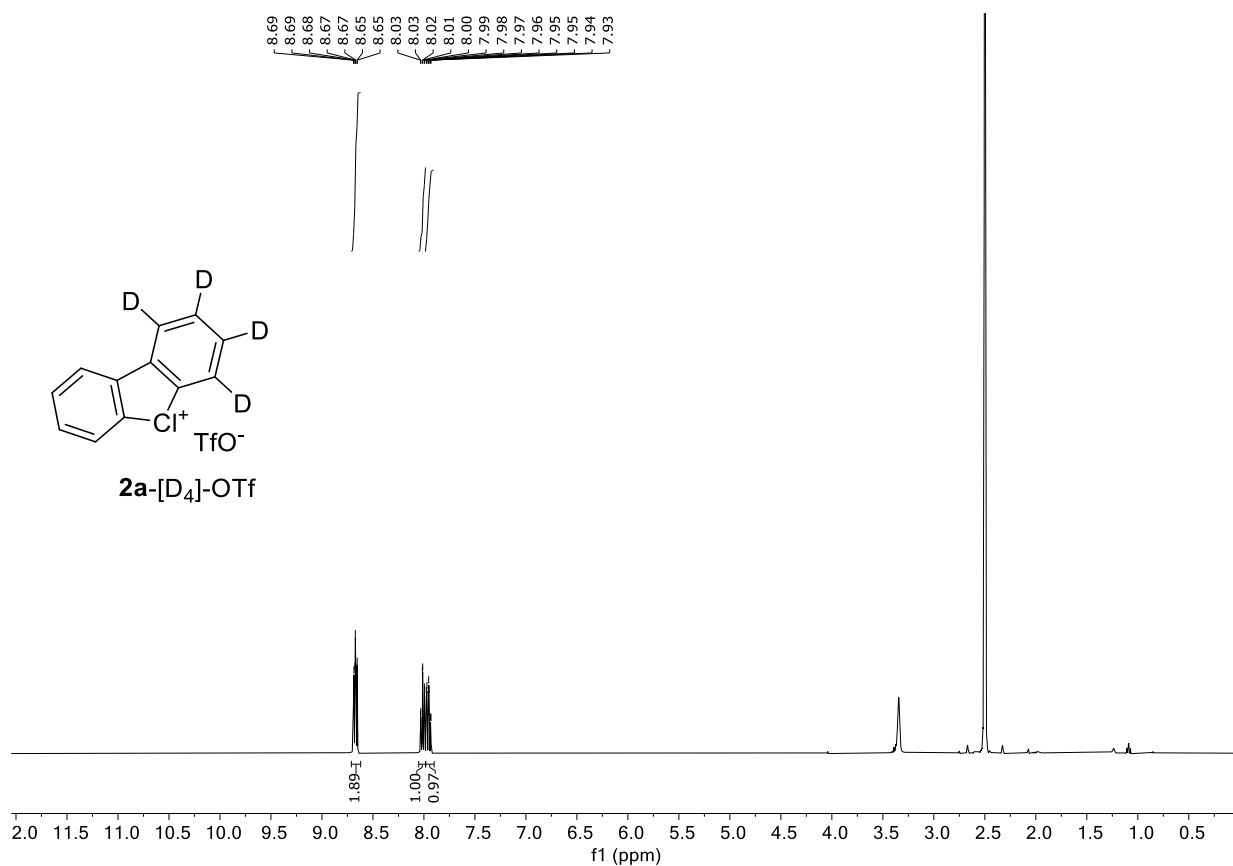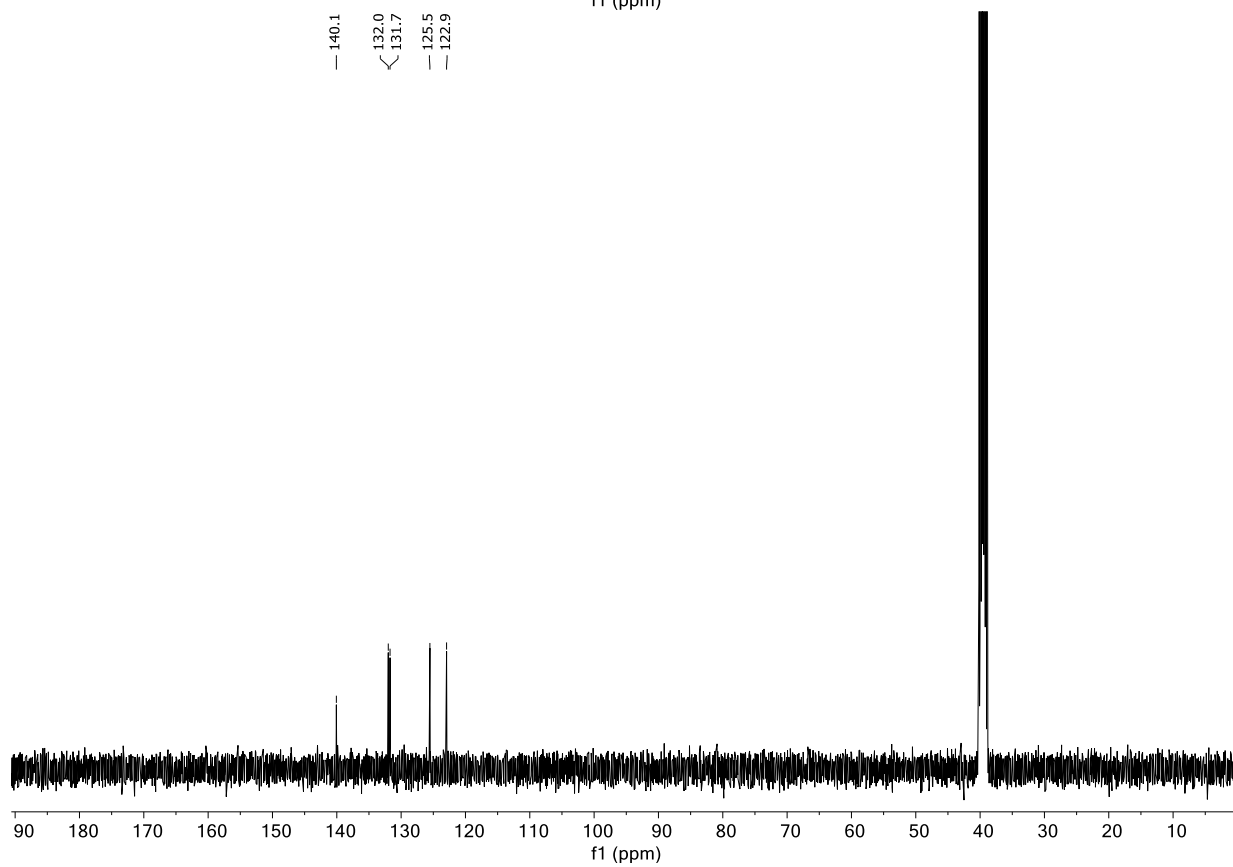

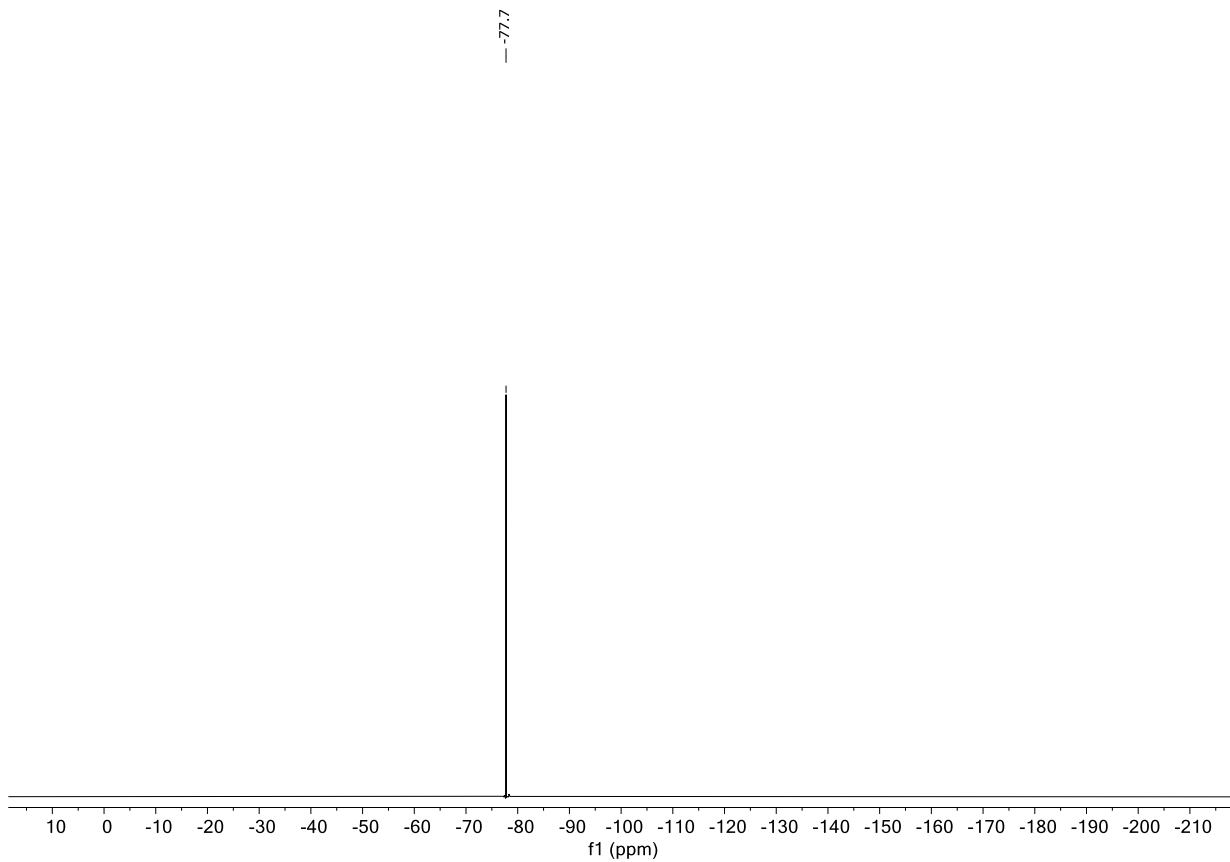

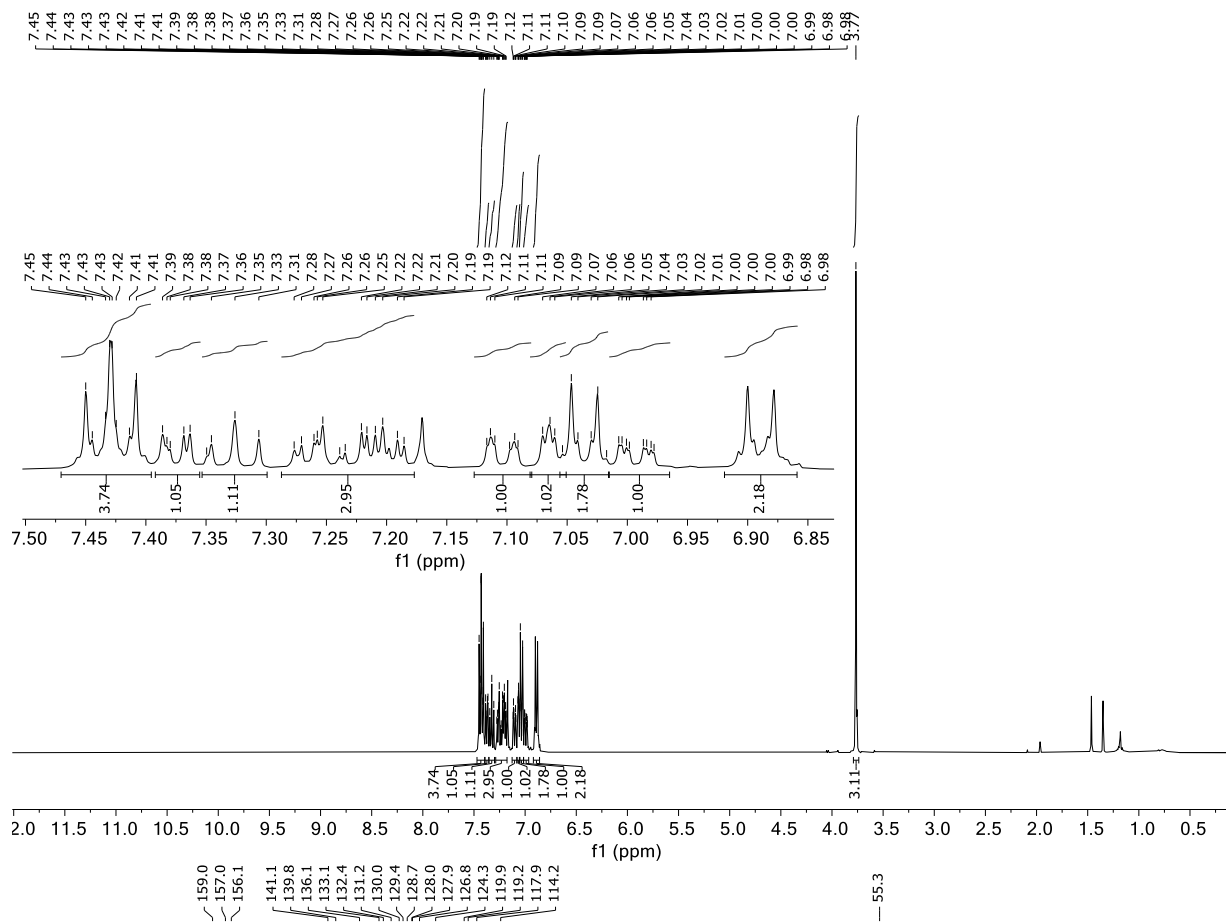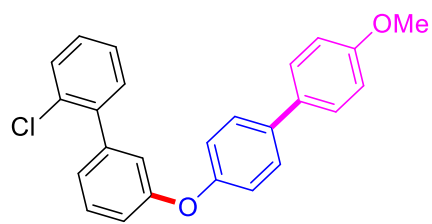

17

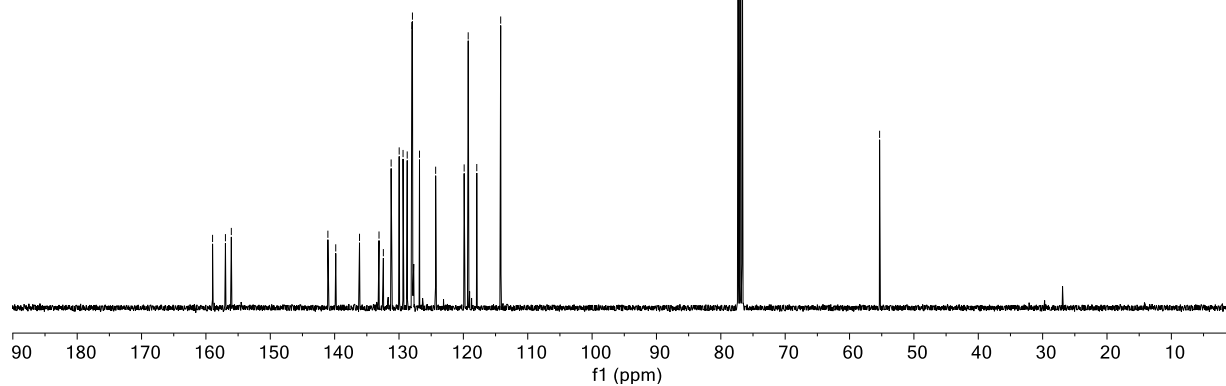

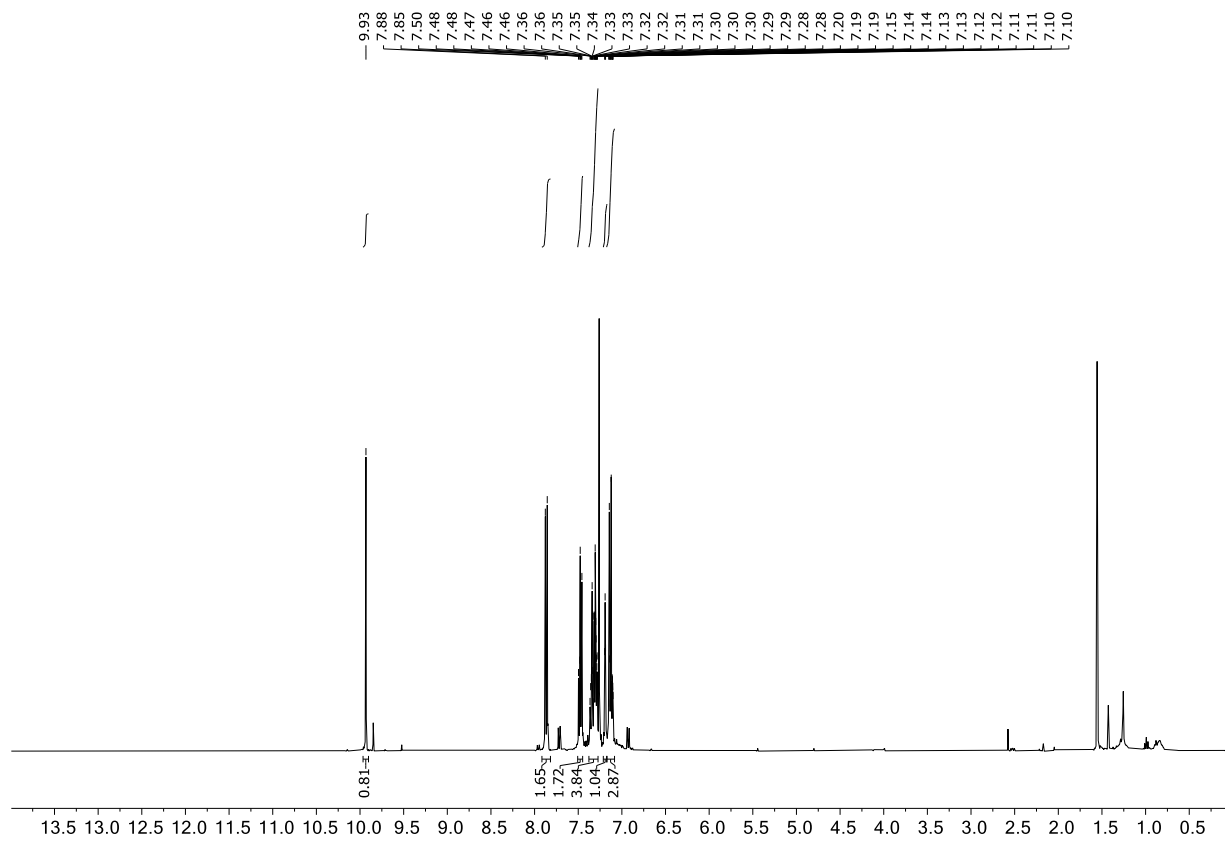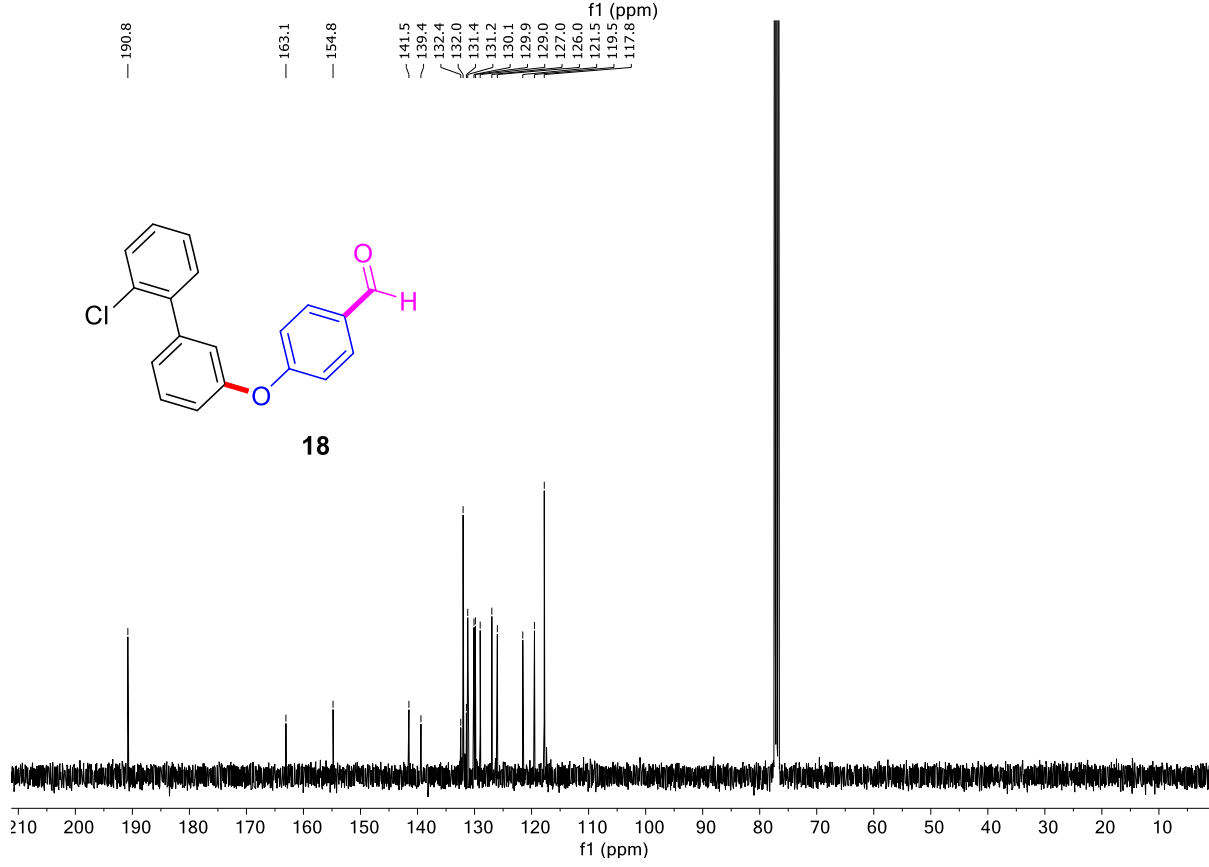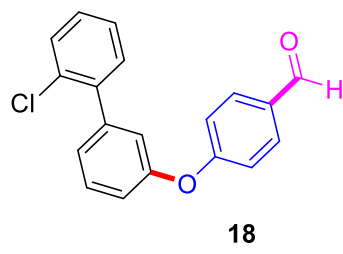



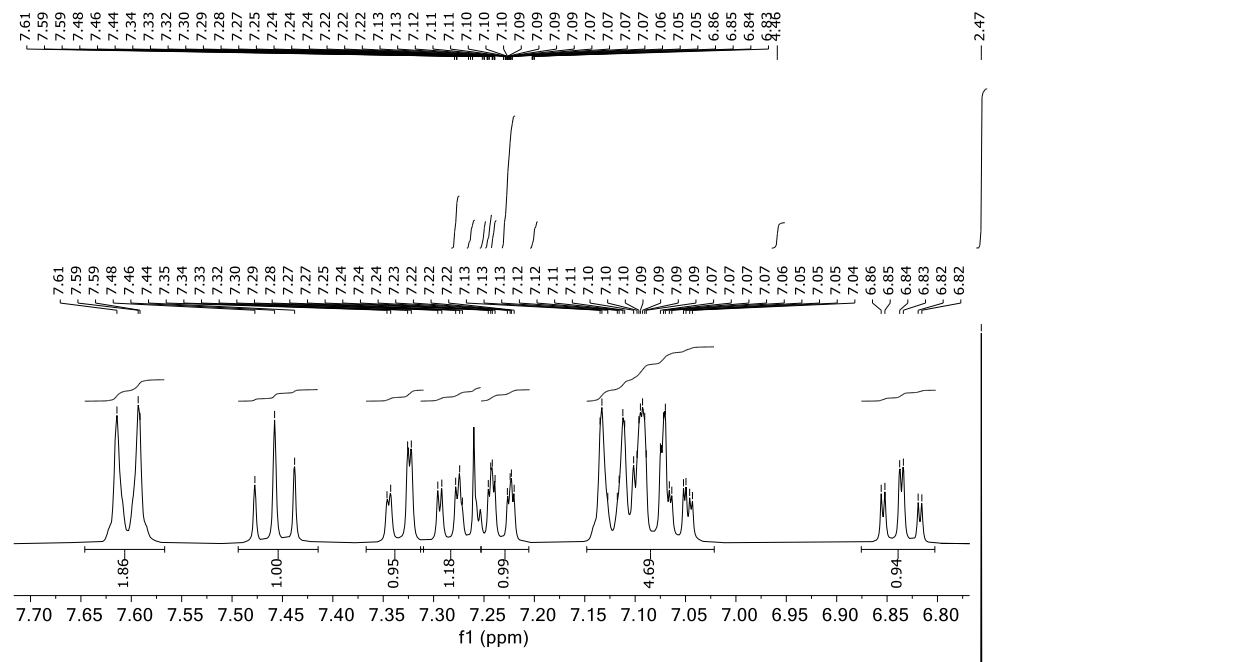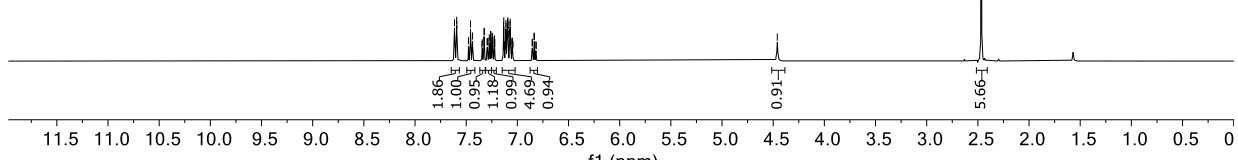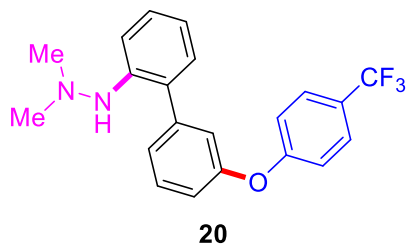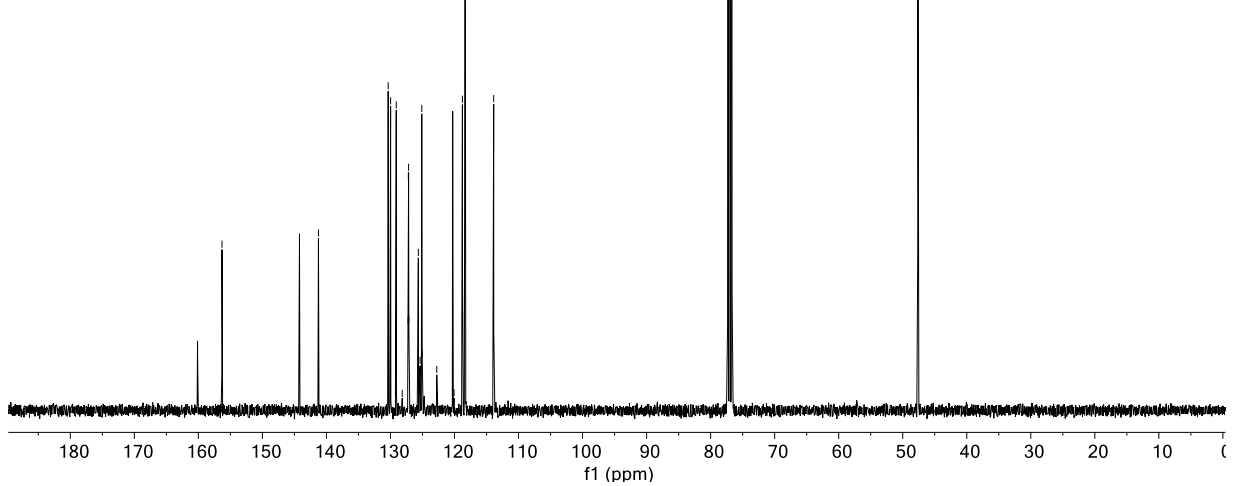

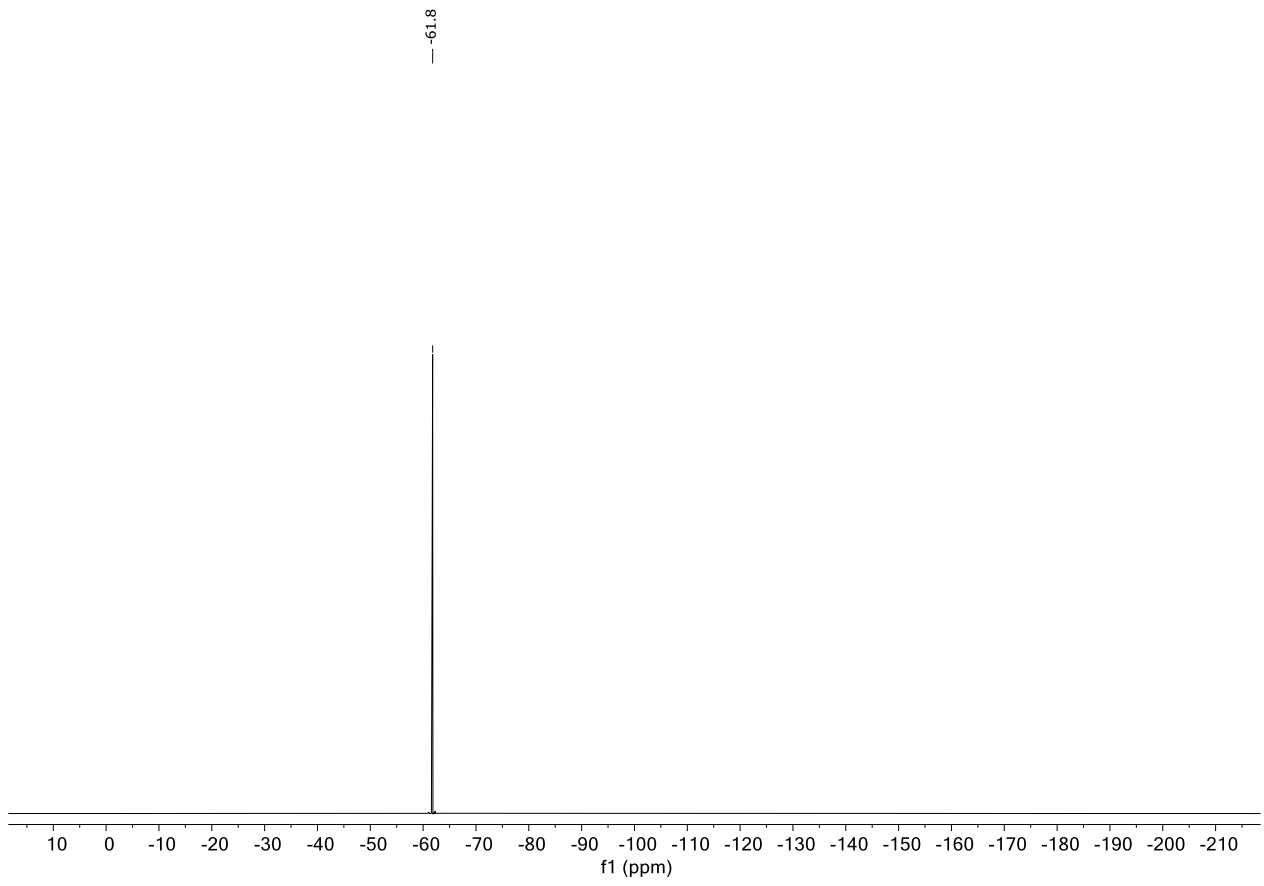



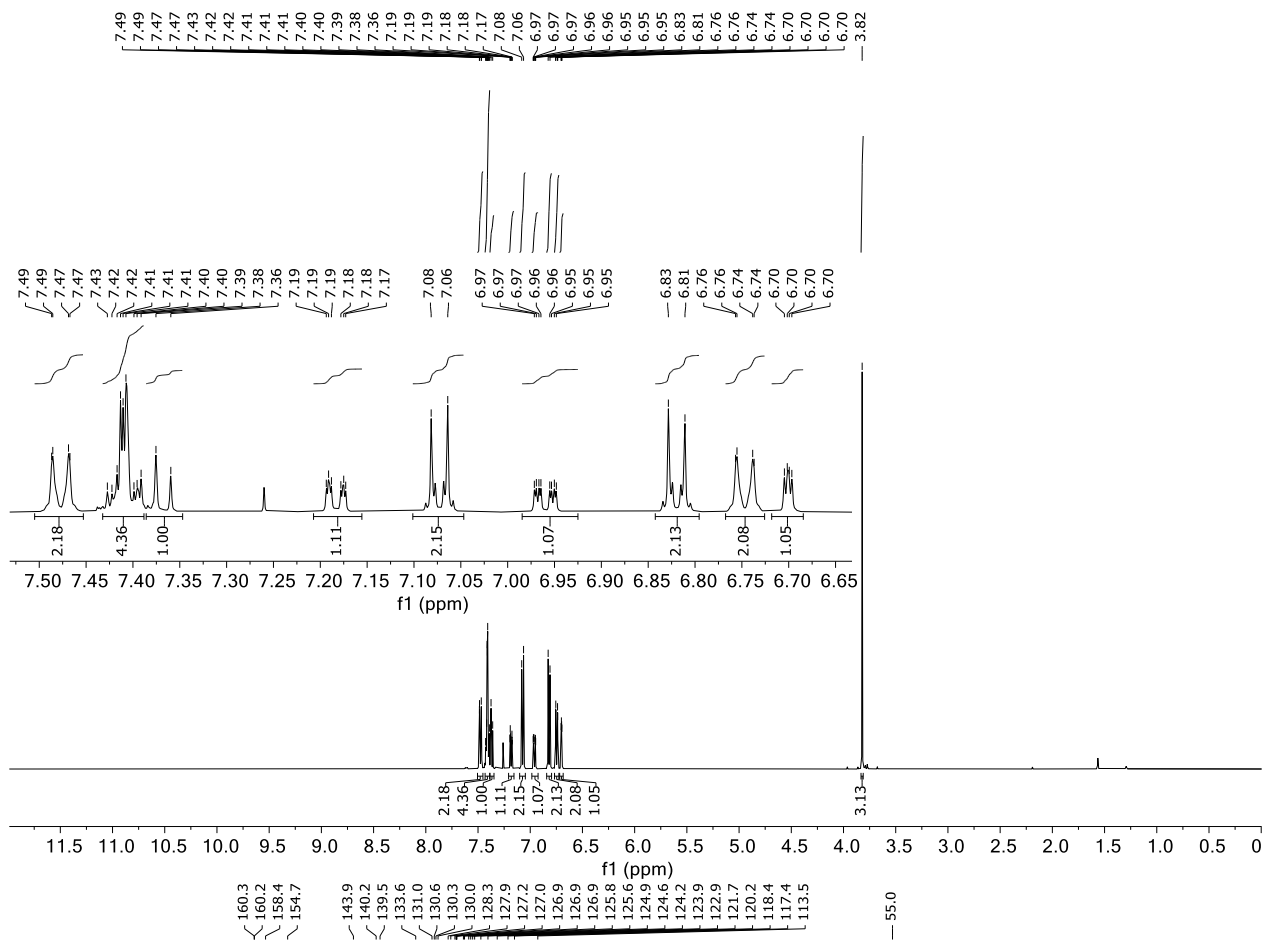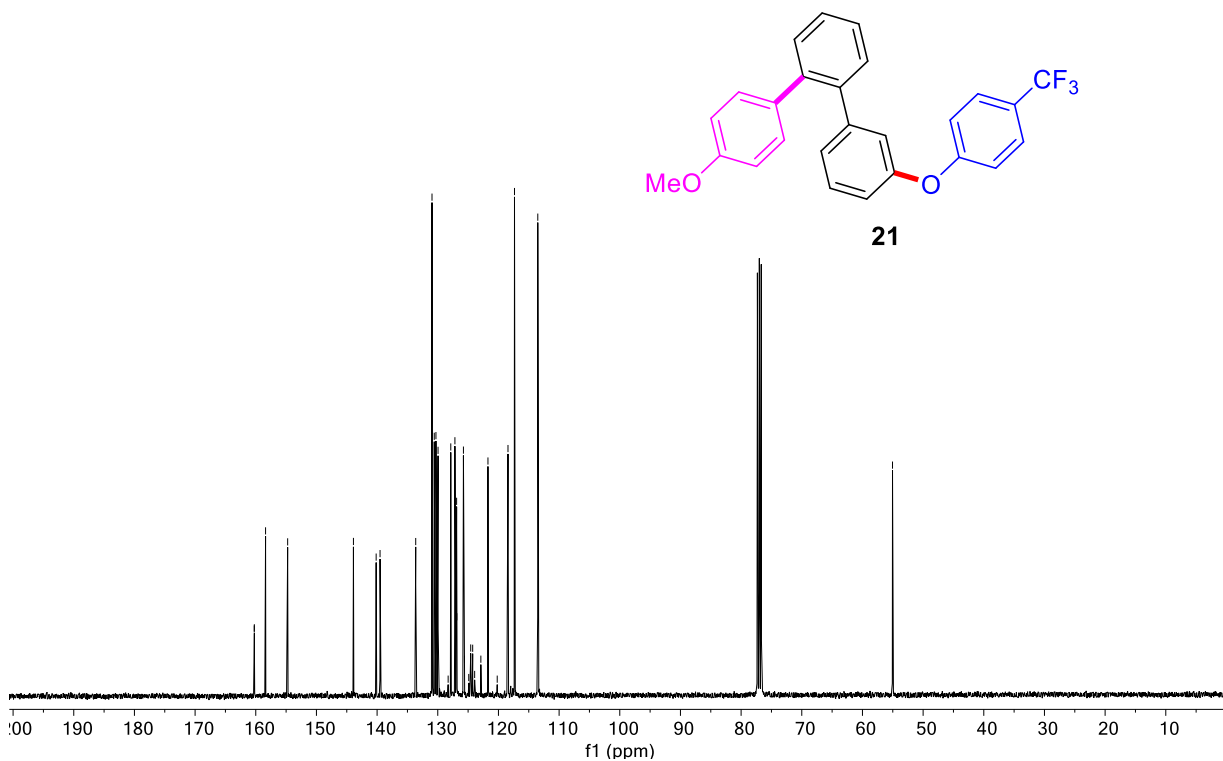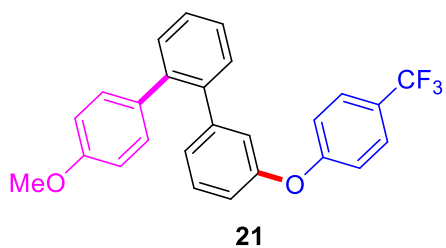

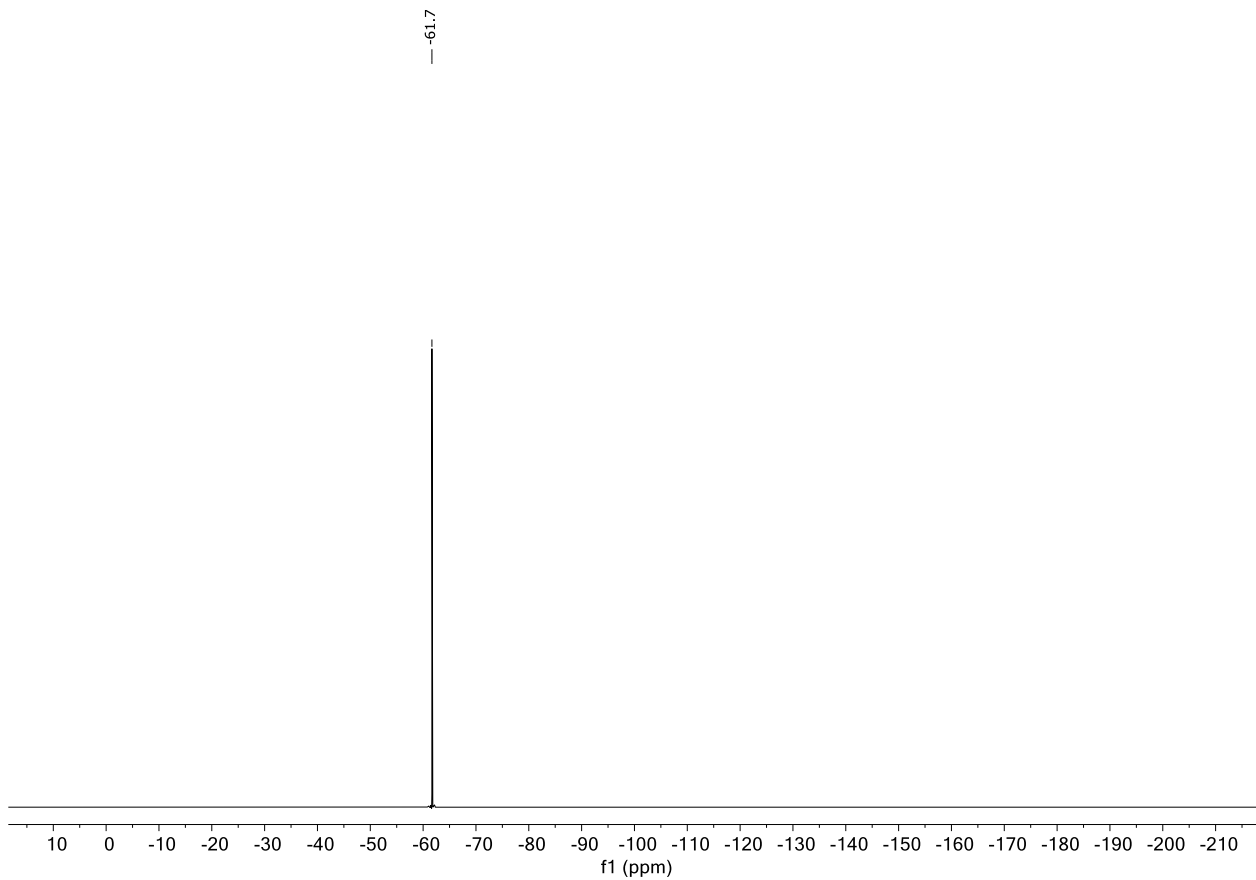

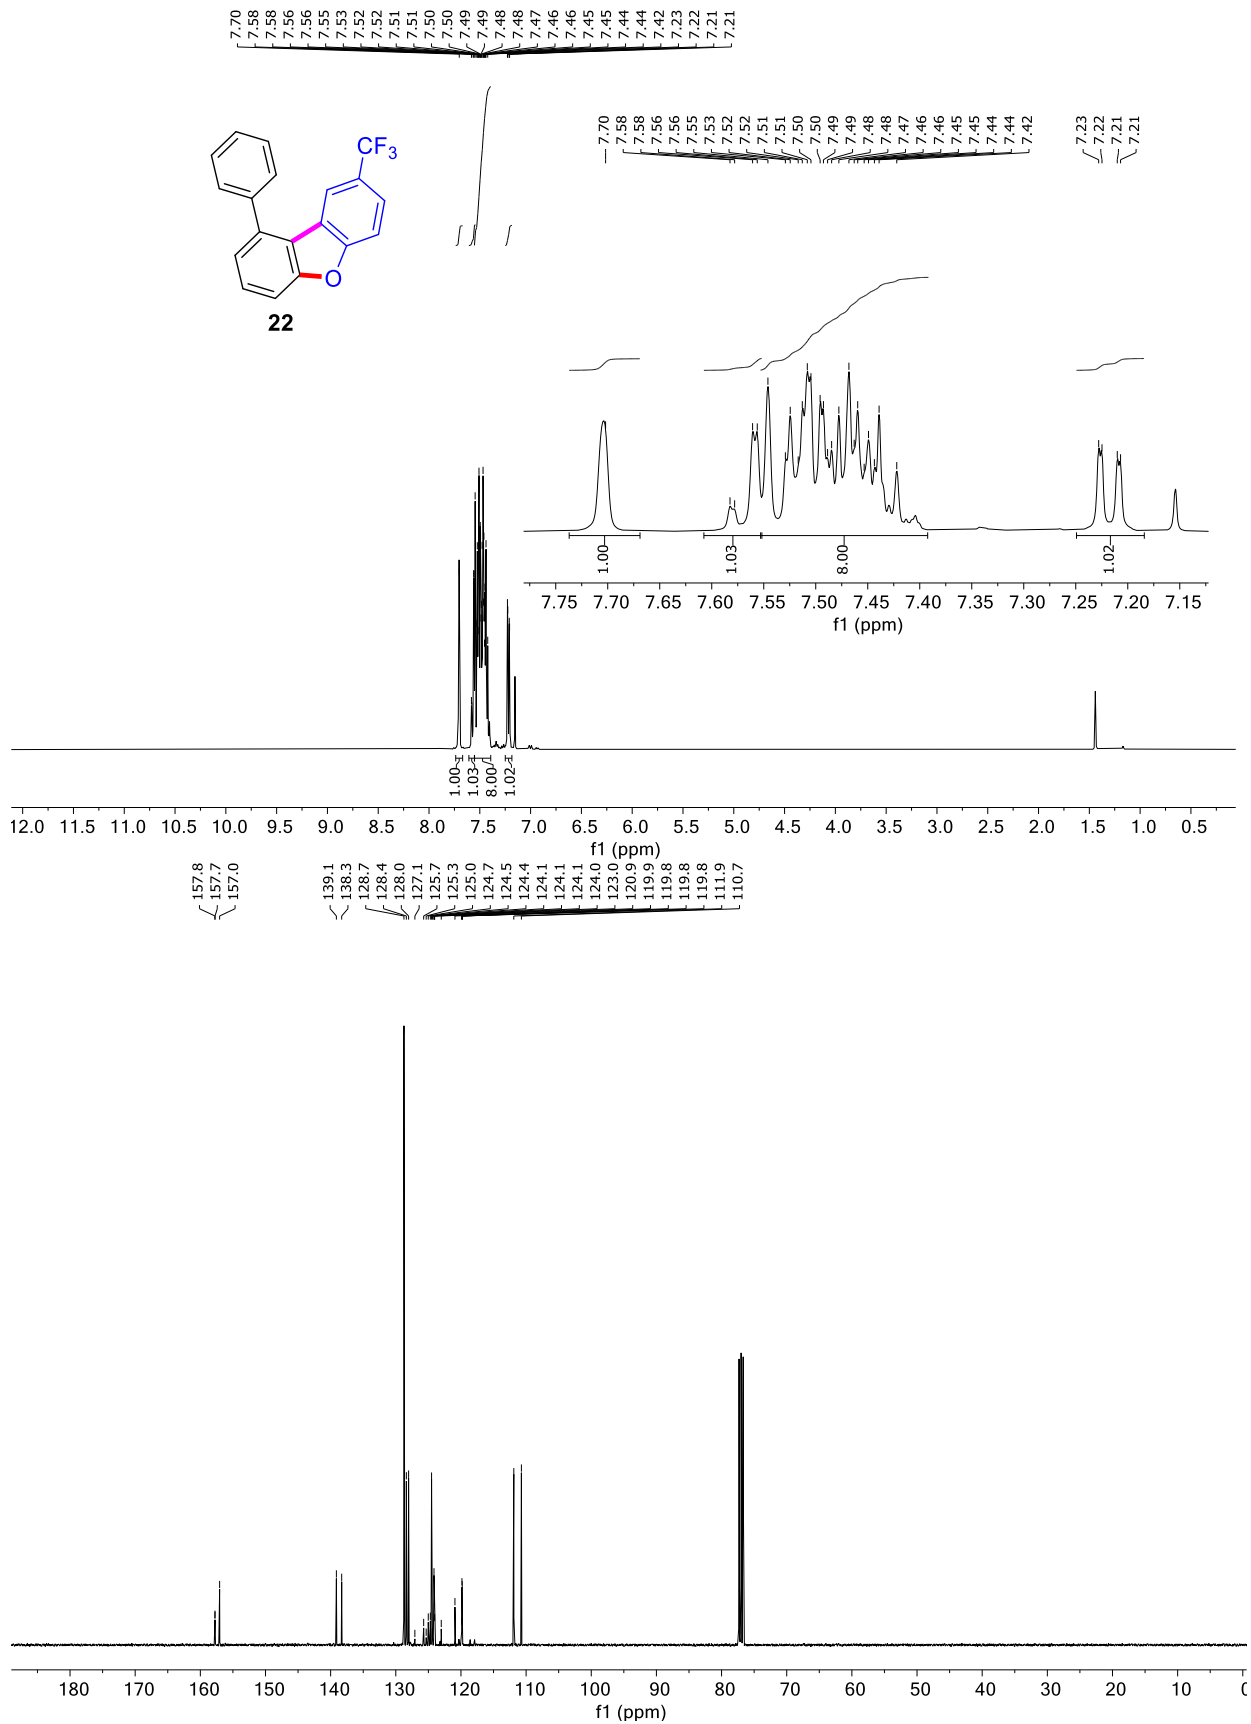

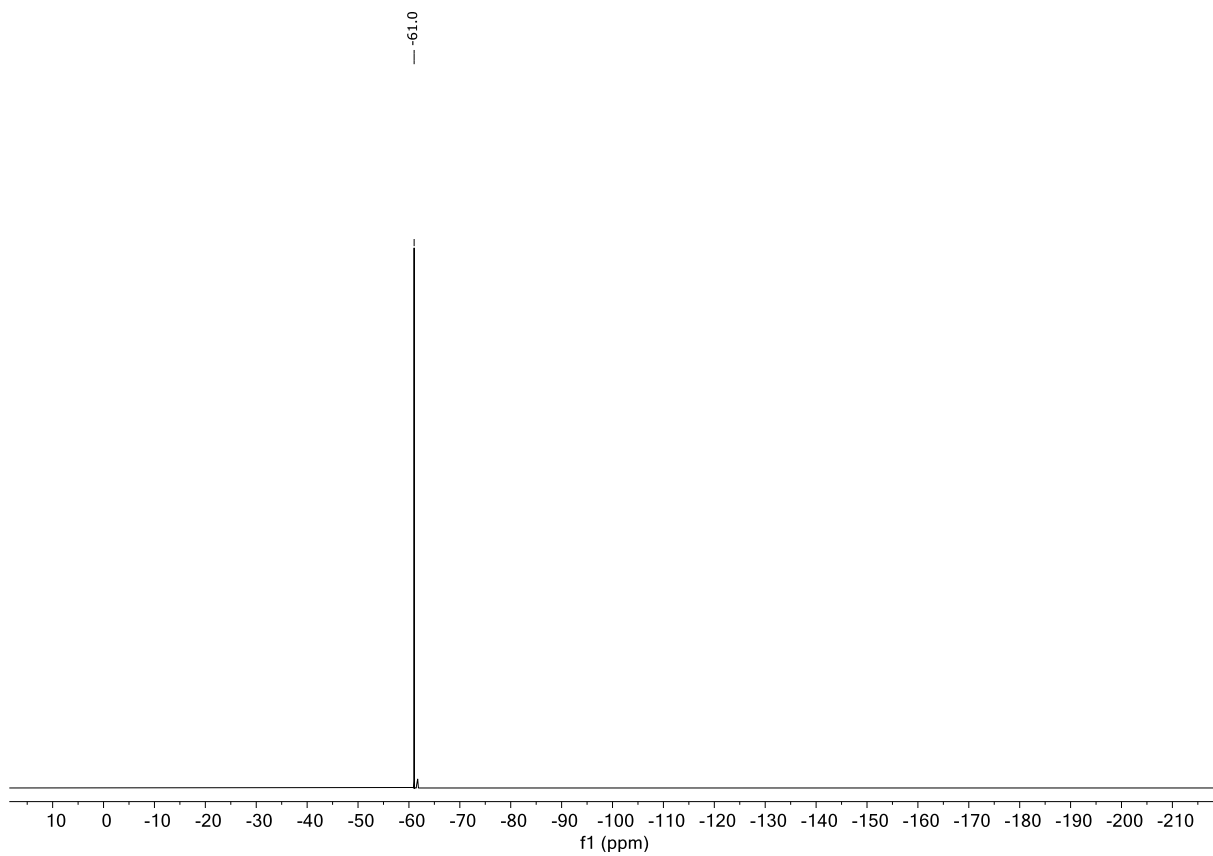

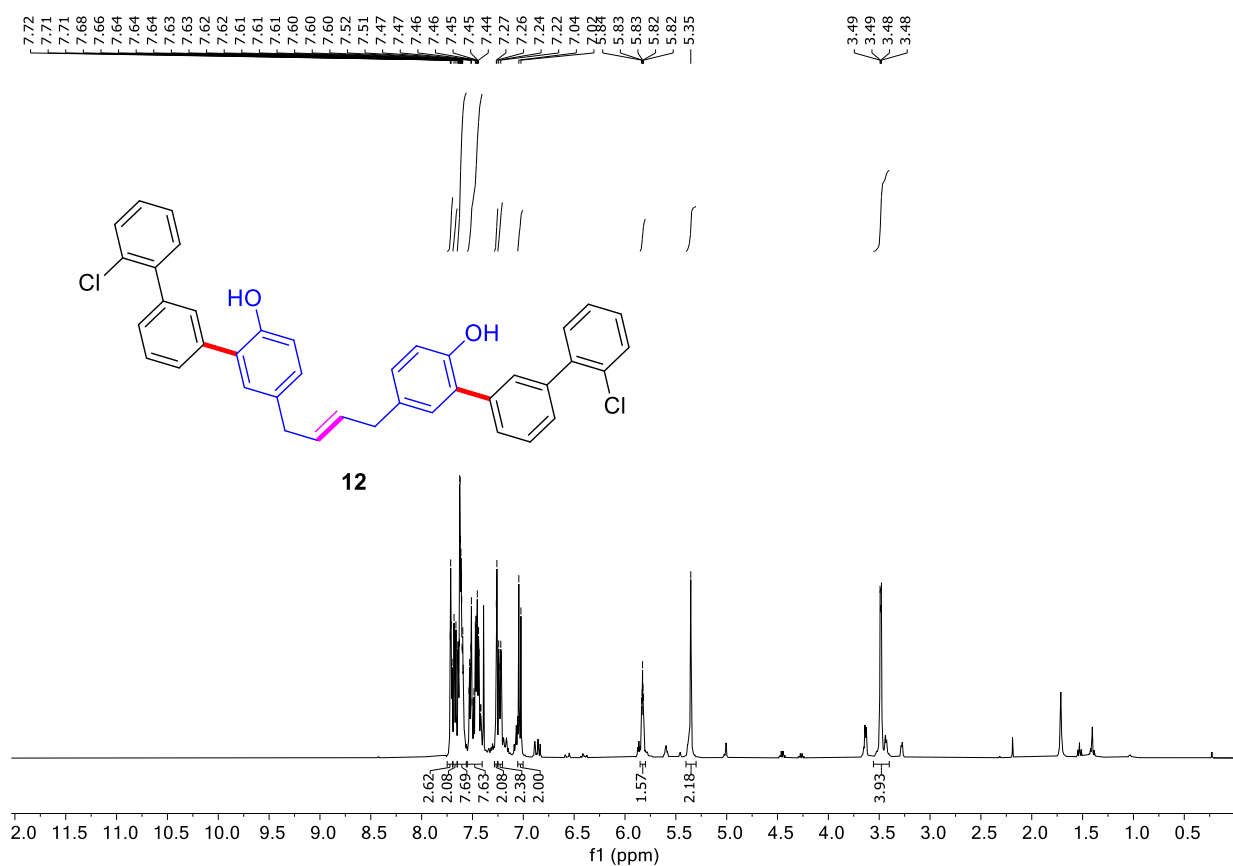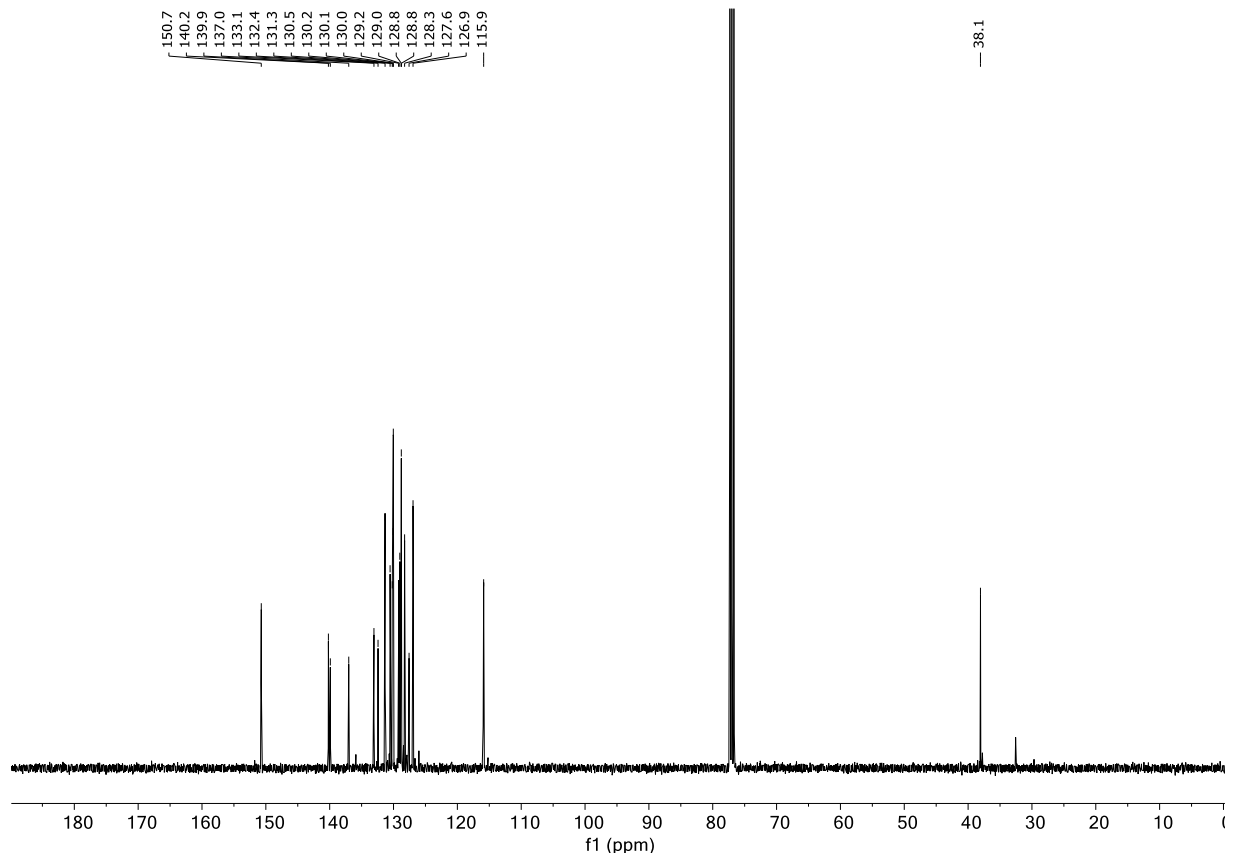

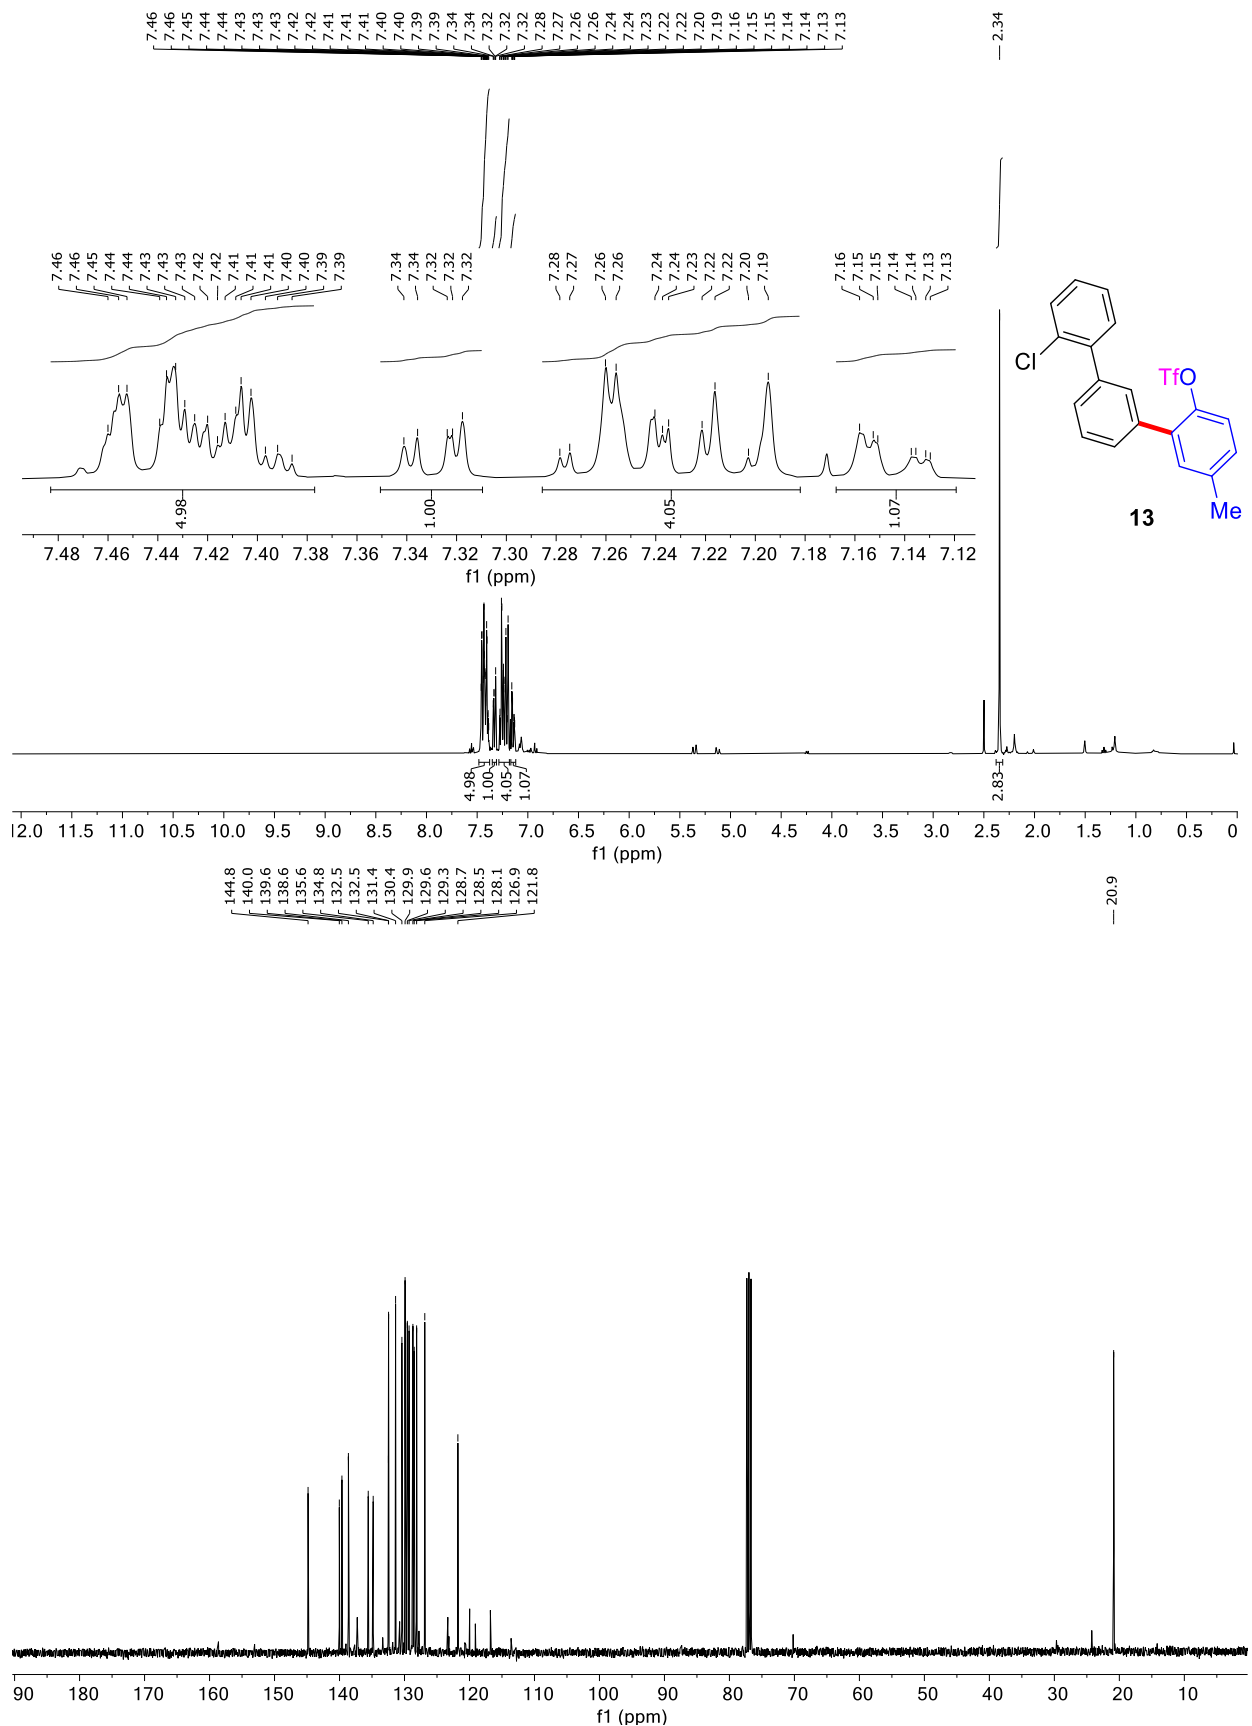

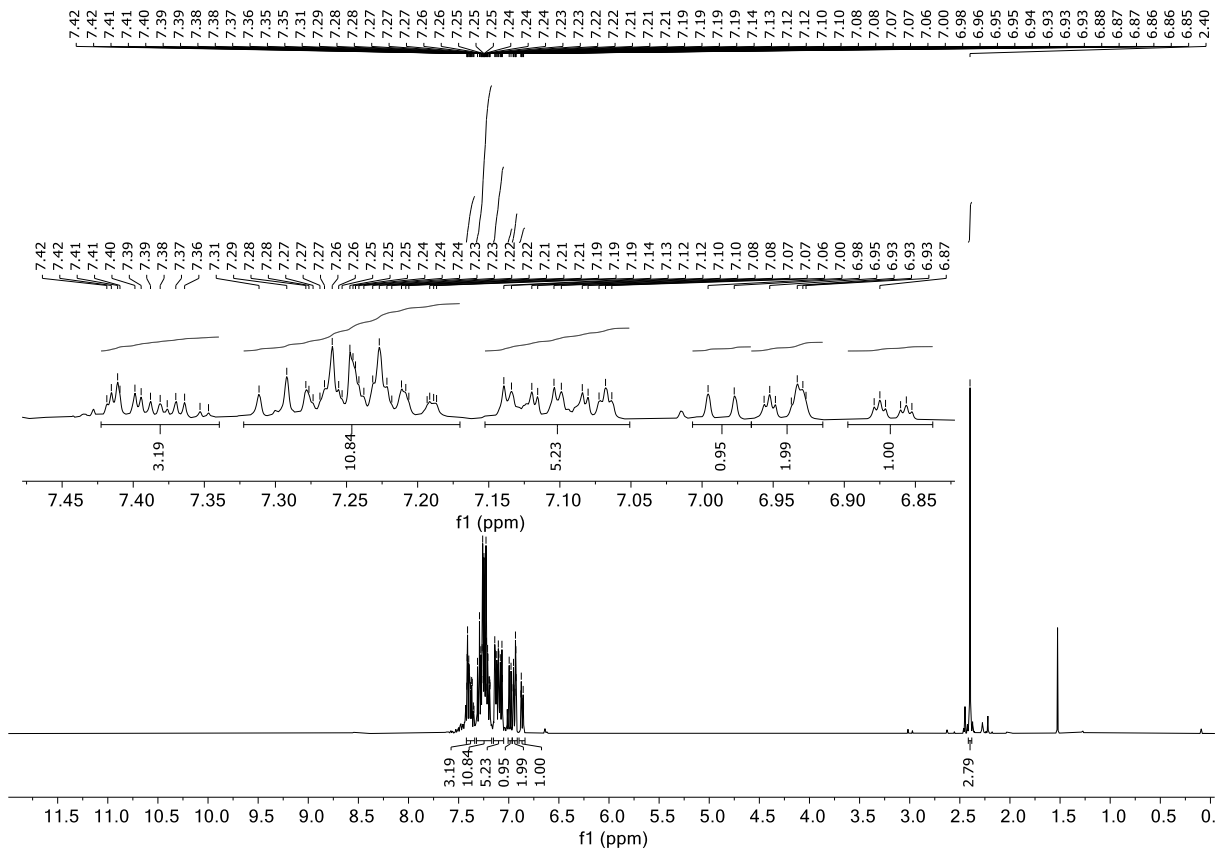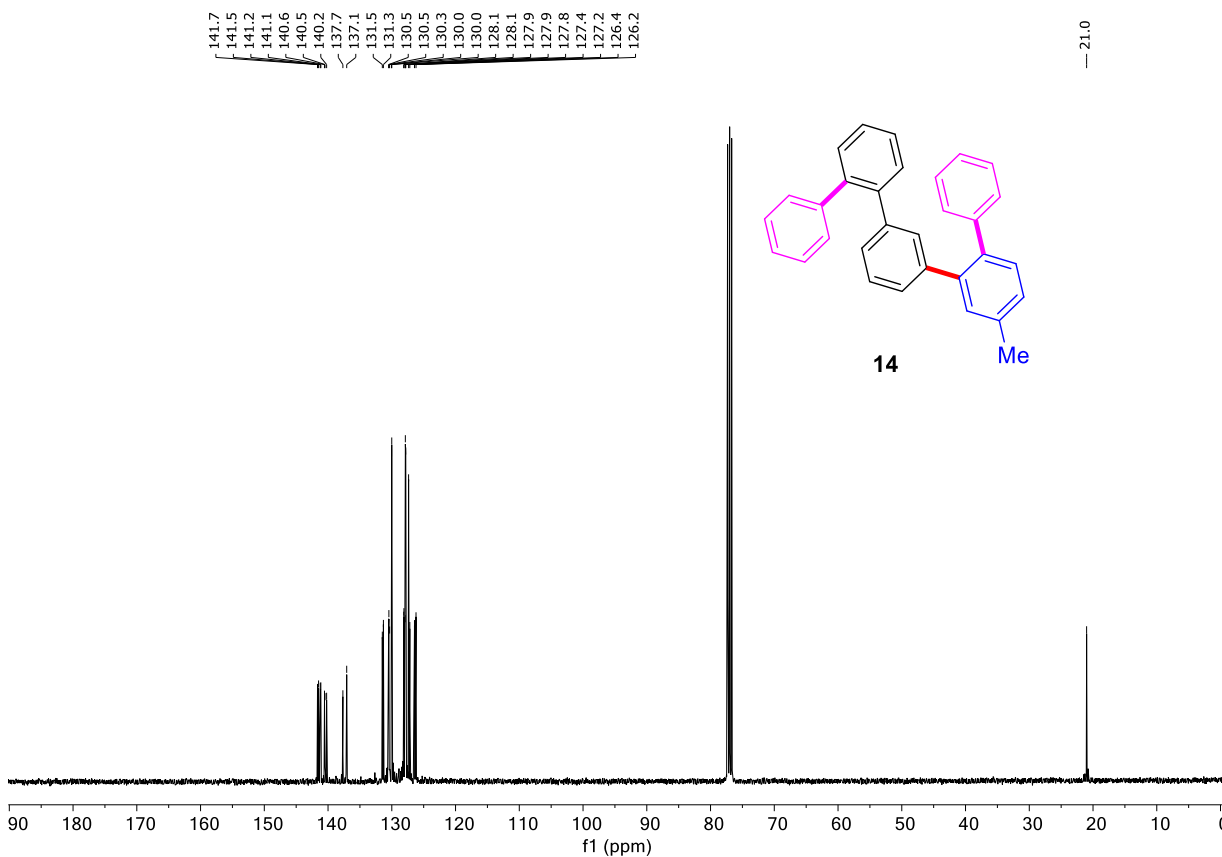

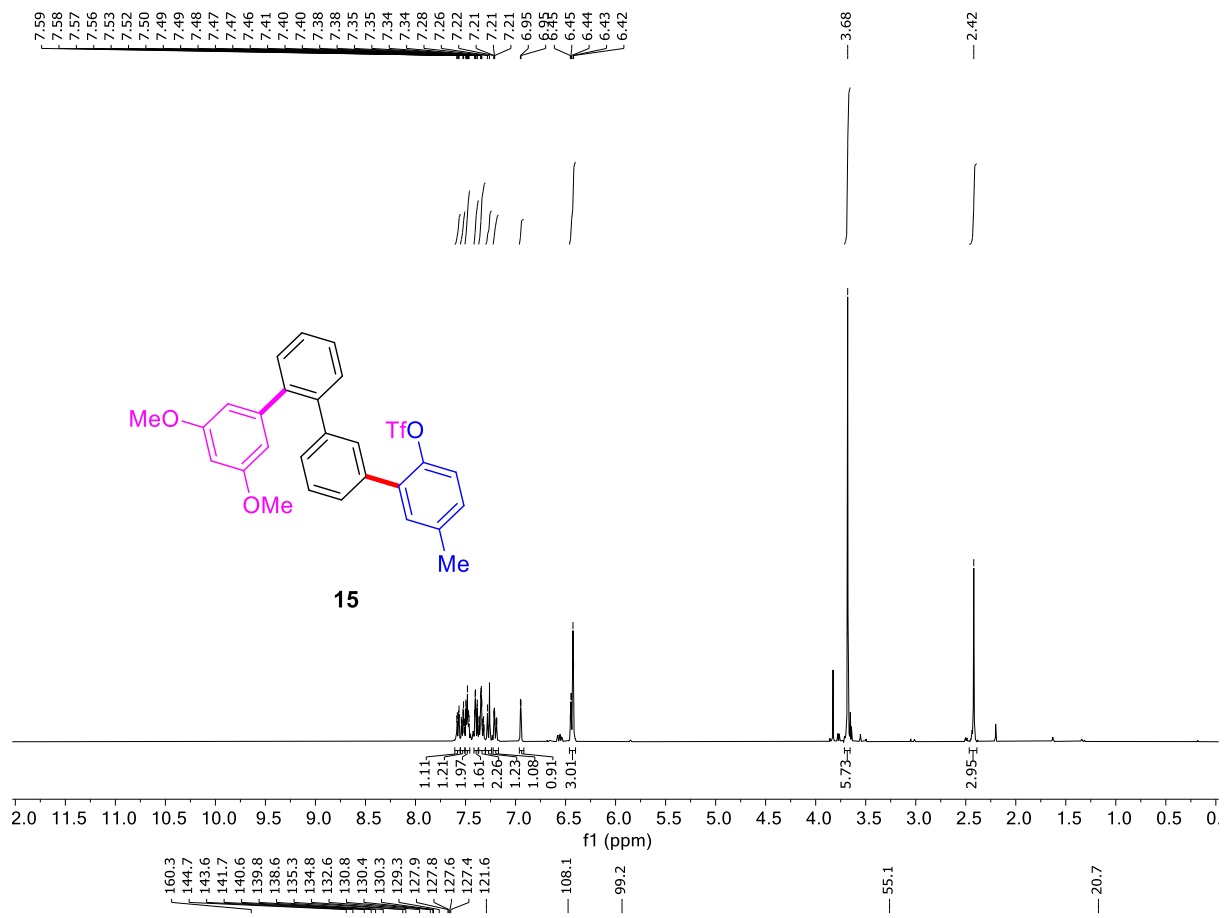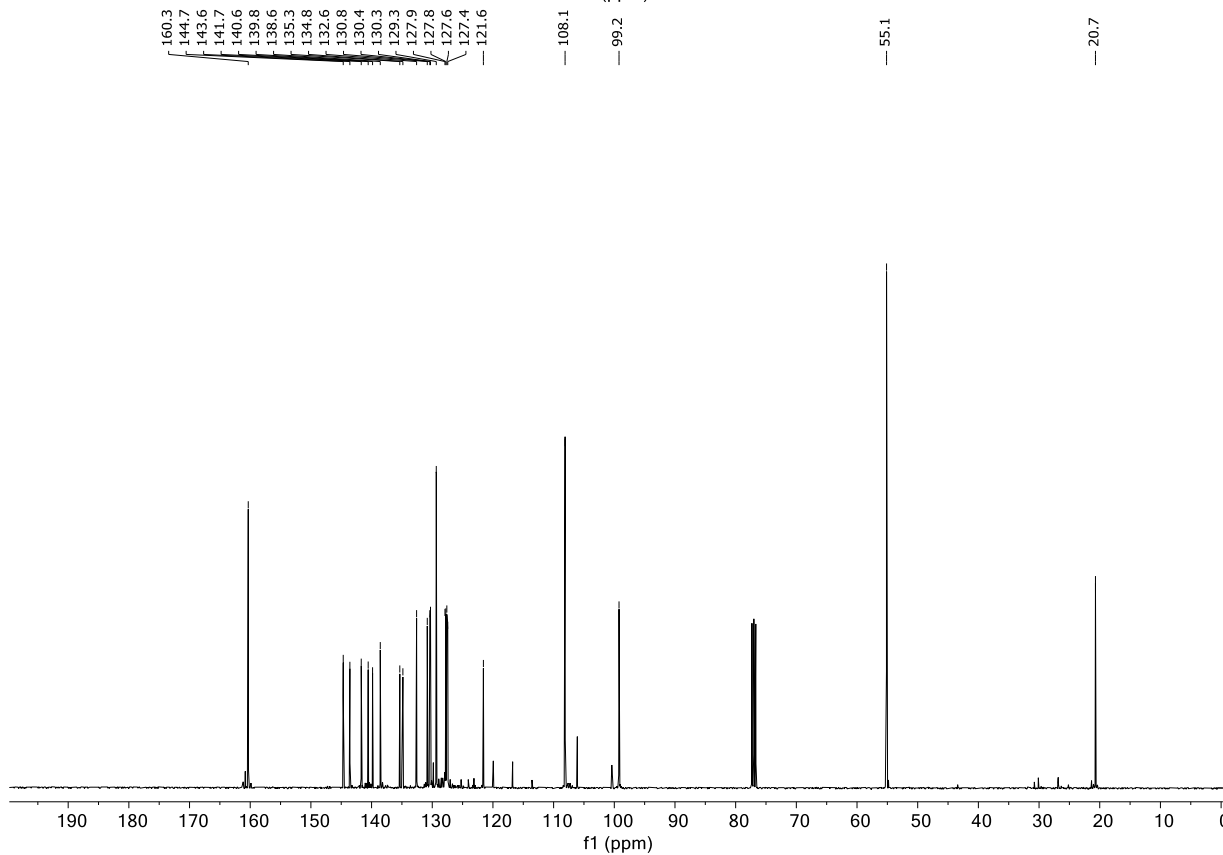



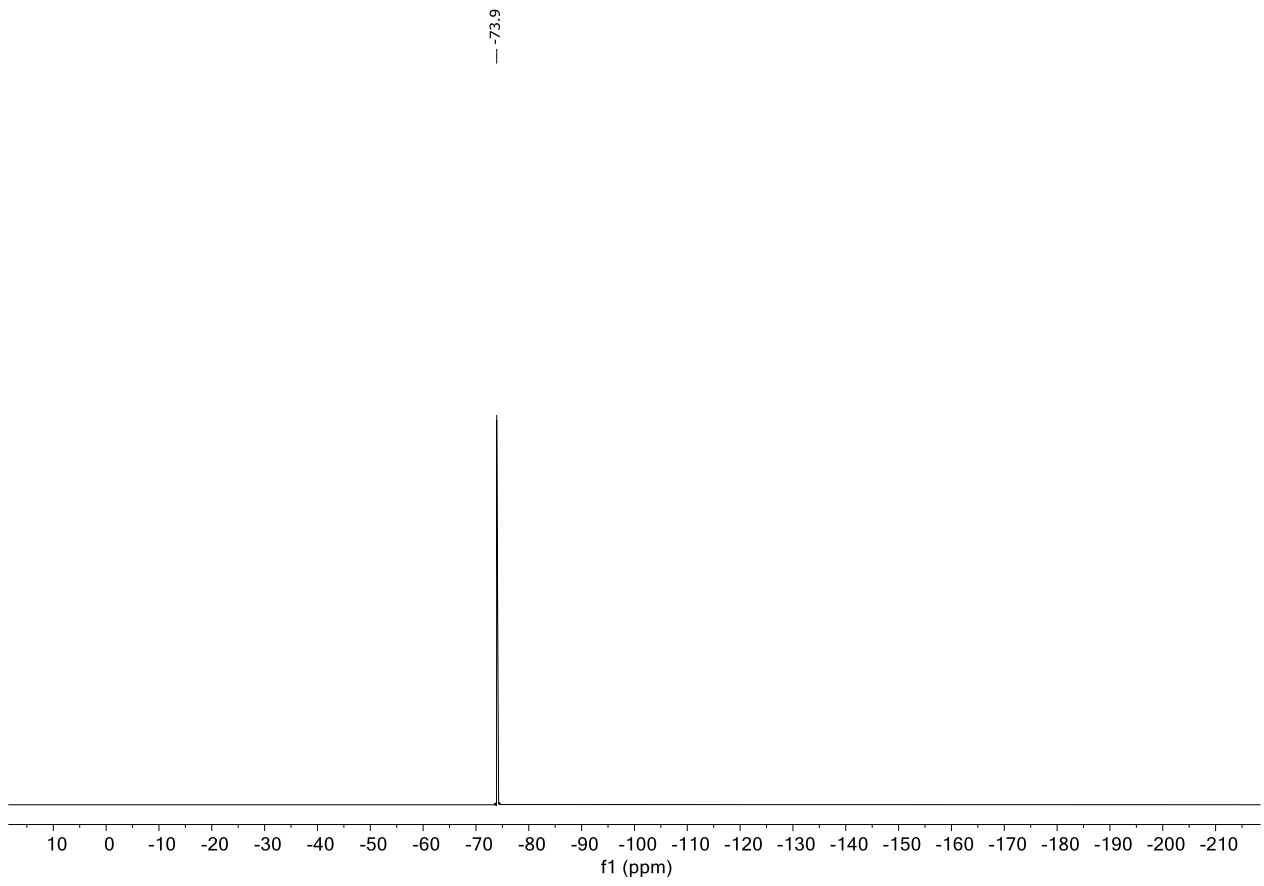

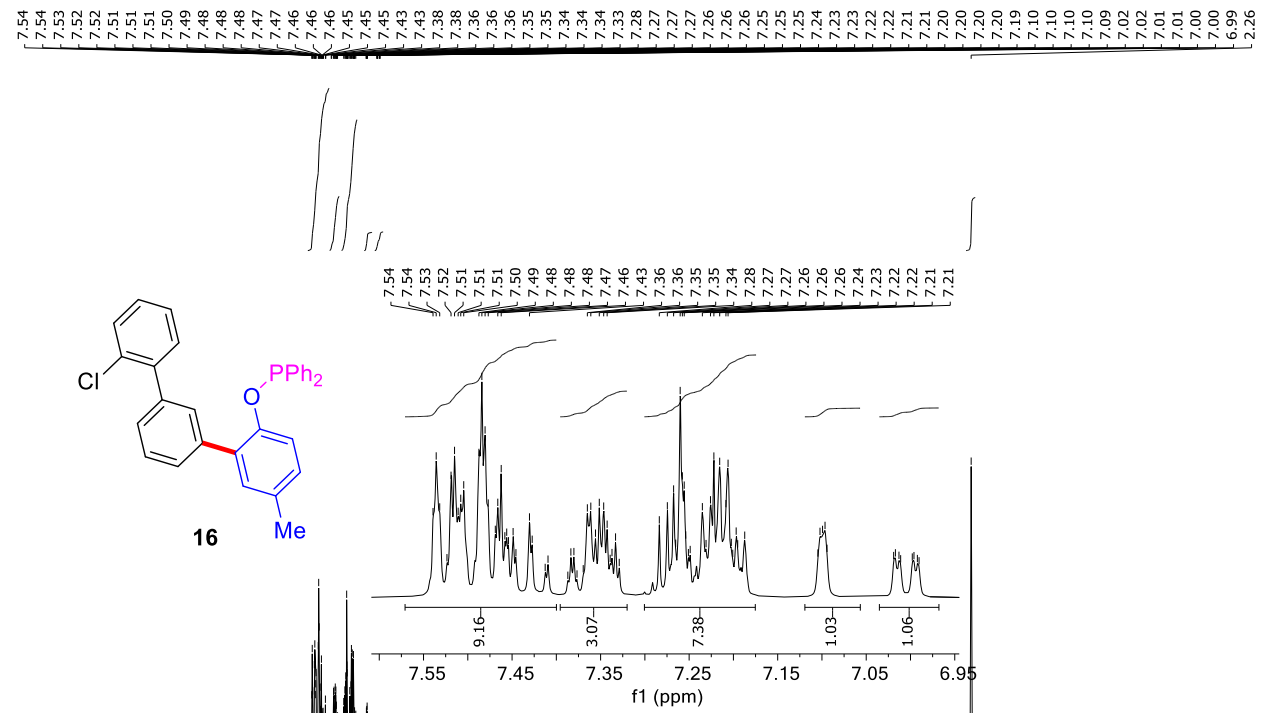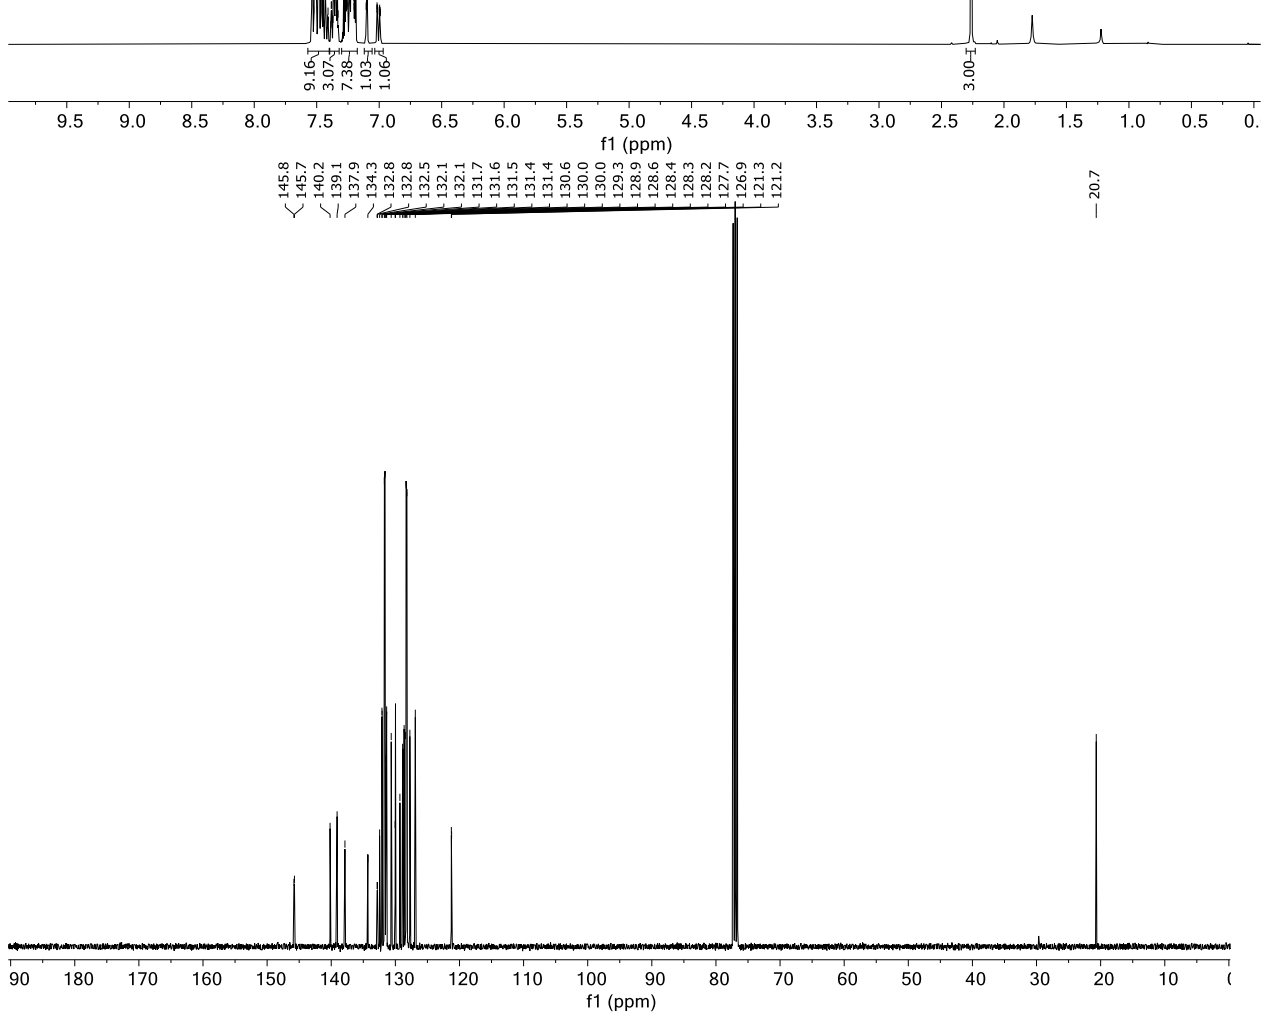

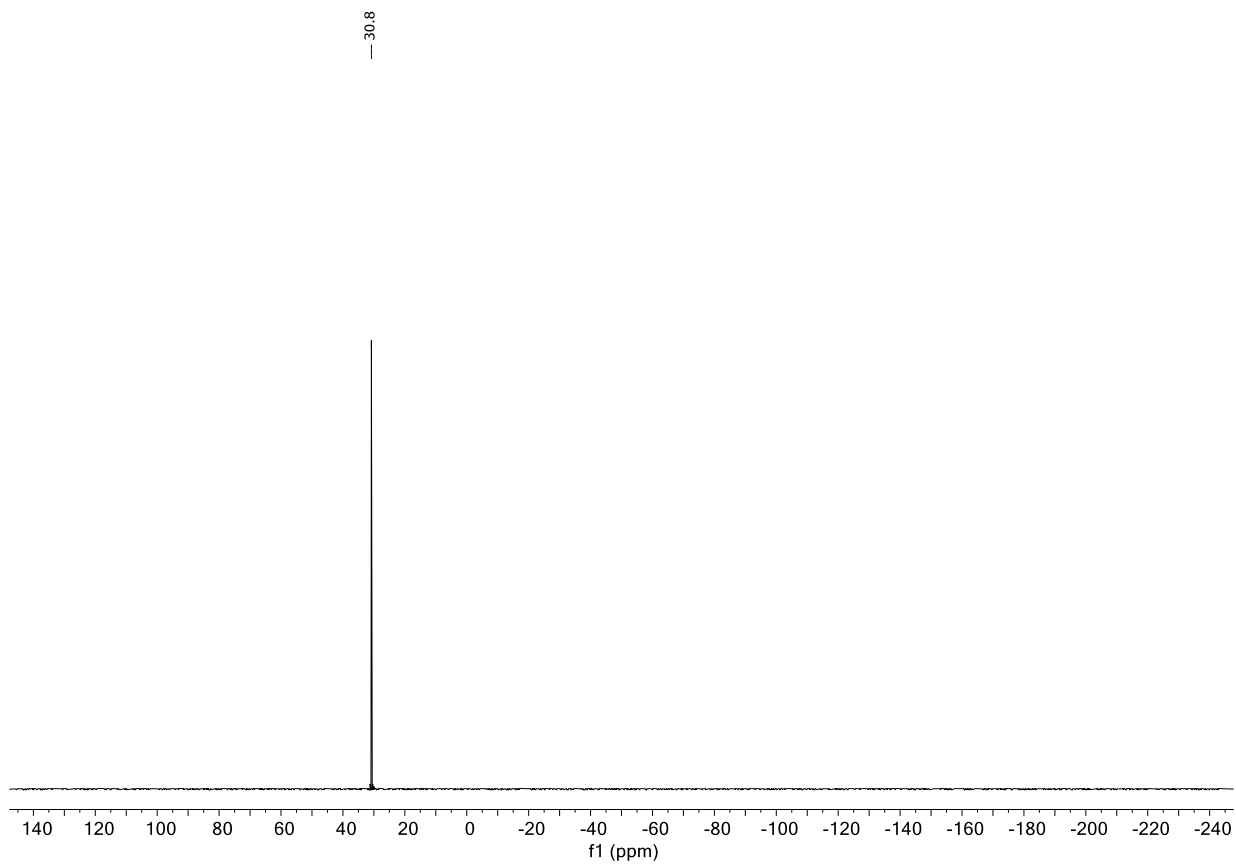

Supplement: ja2c10090_si_001.pdf [file ja2c10090_si_001.pdf]
